# Supplementary material for: The human amniotic epithelium confers a bias to differentiate toward the neuroectoderm lineage in human embryonic stem cells
Source: eLife. 2022 Jul 11;11:e68035. doi: 10.7554/eLife.68035 (PMC9313526; doi:10.7554/eLife.68035)
Supplement: Supplementary file 1. [file elife-68035-supp1.xlsx]

## Sheet: vs AMIQ hESC-iMEF
gene_symbol	logFC	P.Value		gene_symbol	logFC	P.Value
LHX5	6.65363	3.24598e-09		RP11-347C18.1	-6.80424	2.7793e-09
FEZF1	6.91981	4.3464e-08		RP3-406A7.1	-7.07234	3.60768e-09
GREB1L	6.43112	5.23088e-08		RP11-109P14.8	-7.11804	4.34484e-09
SOX21	4.50767	6.97932e-08		RP5-837J1.1	-7.03329	6.75219e-09
ZNF677	4.53451	1.51979e-07		RPSAP23	-7.34049	7.58698e-09
PKDCC	3.01847	3.22714e-07		RPSAP25	-7.34049	7.58698e-09
SIX3	5.2602	3.92951e-07		GAPDHP63	-6.39733	8.65181e-09
C1orf21	2.24363	7.13656e-07		RP11-543E8.2	-6.75054	9.76082e-09
FEZF2	6.15613	8.59582e-07		RPS4XP6	-7.45814	1.03416e-08
LIX1	5.8119	1.16262e-06		EEF1A1P10	-6.59647	1.58693e-08
OLIG3	4.5585	1.45952e-06		RPSAP28	-6.98061	1.90963e-08
HES3	3.16169	2.10578e-06		CTD-2061E19.1	-6.2087	2.04057e-08
IGFBP3	3.38073	2.3752e-06		GAPDHP65	-8.95517	2.17645e-08
RAX	4.81978	2.63487e-06		RPS15AP25	-6.58564	2.54473e-08
SMOC1	4.0809	3.60856e-06		MTND5P10	-7.26016	2.58718e-08
NRP2	1.86626	3.71261e-06		RP4-803A2.1	-7.76812	2.60361e-08
COL3A1	4.13813	3.80786e-06		EEF1A1P27	-6.5508	2.69315e-08
ZNF253	3.33554	4.03494e-06		RP11-28P17.3	-7.0011	3.13347e-08
PTHLH	5.71086	5.89516e-06		CTC-398G3.2	-5.75522	3.19545e-08
IRX2	2.09827	7.29971e-06		RPL18P13	-6.54949	4.34526e-08
CRB2	2.80903	7.64204e-06		RPLP1P11	-7.46254	4.74466e-08
KRTAP13-4	4.23109	7.84064e-06		RP11-307I14.2	-6.90123	4.92255e-08
FEZ1	2.25712	8.78517e-06		RP11-204K16.1	-6.63851	5.72239e-08
PLSCR5	5.22142	9.2361e-06		RP11-343B5.1	-6.0451	5.84604e-08
GNRHR2P1	4.79876	9.68049e-06		NACA3P	-5.58027	5.91124e-08
RSPO3	5.45953	1.11974e-05		AF131215.1	-6.22056	6.36396e-08
TNF	4.09595	1.15765e-05		RP11-416L21.2	-6.53898	6.70669e-08
C6orf141	3.2824	1.19168e-05		PGAM1P2	-6.57725	7.452e-08
SFRP1	2.8029	1.26316e-05		RPS23P7	-7.3333	7.5691e-08
SOX1	4.59639	1.29582e-05		RP11-92C4.4	-6.78213	1.09498e-07
TRPC4	2.9766	1.56837e-05		NPM1P8	-6.39576	1.13104e-07
MN1	2.10758	1.71849e-05		ATP5BP1	-6.16596	1.23192e-07
NNAT	2.71407	1.79016e-05		EEF1B2P2	-6.89218	1.24554e-07
CMTM5	5.75035	1.83223e-05		RP11-388B24.4	-6.89395	1.29024e-07
SOX9	2.31714	1.83658e-05		RPL7P5	-6.71912	1.40116e-07
TGFB2	3.32821	2.01139e-05		AC016739.2	-5.20878	1.41266e-07
ZNF521	2.78401	2.02045e-05		AC099535.4	-5.3074	1.41695e-07
PLCL2	2.14077	2.03157e-05		RPSAP31	-6.56361	1.47873e-07
TNFAIP3	2.18301	2.10651e-05		AC108039.1	-6.2352	1.52614e-07
CCDC80	2.07868	2.14718e-05		FTH1P5	-8.62401	1.53947e-07
DLK1	4.32383	2.26029e-05		EEF1A1P12	-4.67454	1.63903e-07
LEF1	3.17368	2.26757e-05		ATP5G2P1	-6.3868	1.64247e-07
DSG3	3.60272	2.40158e-05		RP11-543B16.2	-6.45257	1.64636e-07
CYP1B1	2.44836	2.43509e-05		PDIA3P1	-4.9913	1.64938e-07
FAP	4.32432	2.5095e-05		RPS4XP21	-6.65967	1.74612e-07
FHOD3	2.20537	2.80064e-05		RP11-215P8.1	-6.93286	1.80356e-07
ZIC1	3.91368	2.81524e-05		RP11-313E4.1	-6.2883	1.89643e-07
SNAI2	3.54178	2.87222e-05		RP11-305L7.5	-6.92086	2.01436e-07
ZNF662	3.2621	2.95133e-05		AGTR2	-6.58418	2.10621e-07
PKNOX2	2.44217	3.05242e-05		BTF3P7	-6.18724	2.10791e-07
LRRTM1	2.61548	3.10018e-05		RPL5P29	-6.14296	2.11034e-07
EDN1	2.55578	3.17976e-05		GAPDHP44	-7.68639	2.32349e-07
PLEKHB1	2.14367	3.37644e-05		PKIB	-3.09576	2.45027e-07
ODAM	4.09677	3.59179e-05		RP11-214N15.5	-5.19535	2.54025e-07
GDPD2	1.99327	3.59917e-05		RP3-486I3.4	-7.26767	2.58963e-07
MEOX1	4.62129	3.81353e-05		RP11-759L5.2	-7.11564	2.63506e-07
LRP2	2.3447	4.0081e-05		FTH1P2	-4.95291	2.64343e-07
GLI3	1.90844	4.03772e-05		RP11-267D19.2	-6.19002	2.77e-07
HMX2	3.69855	4.08695e-05		MMP3	-7.94647	2.99114e-07
OTX2	1.94516	4.09041e-05		TBCAP1	-6.07376	3.33856e-07
KRT16	4.0237	4.23252e-05		RP1-146I3.1	-6.05249	3.49734e-07
CPXM2	1.7434	4.82539e-05		ASS1P6	-5.67992	3.52431e-07
PAX6	4.21544	4.92478e-05		RPL17P20	-6.6958	3.64583e-07
CTSF	3.04274	5.45103e-05		RPL4P4	-4.42954	3.83388e-07
PRTG	3.86202	5.55794e-05		TUBB4BP7	-6.05397	4.16933e-07
IER3	2.62077	5.58388e-05		RPS17P2	-6.19831	4.20991e-07
ZIC4	3.7439	5.65971e-05		PPIAP22	-6.08945	4.21389e-07
OTX1	3.43317	5.70615e-05		GAPDHP51	-6.52268	4.26965e-07
FBN2	1.78197	5.82423e-05		HSP90B2P	-5.05294	4.27096e-07
GNA15	3.20883	6.00579e-05		EEF1A1P5	-2.70679	4.51479e-07
C15orf48	4.27748	6.04064e-05		EBF2	-4.49557	4.62228e-07
GREM1	3.45251	6.22954e-05		RP11-334L9.1	-6.21304	4.77392e-07
AGR2	4.37764	6.27811e-05		AC104076.2	-5.37011	5.15953e-07
PAPPA	2.59457	6.30451e-05		HINT1P2	-6.4067	5.45411e-07
IGF2	5.23864	6.35572e-05		AC113404.1	-6.39241	5.46289e-07
MMP1	6.4301	6.35727e-05		RP11-389O22.4	-5.72164	5.51904e-07
CYP26C1	4.01792	6.39372e-05		NPM1P43	-5.59135	5.63464e-07
ZNF732	4.61609	6.83687e-05		LA16c-3G11.7	-5.5256	6.02392e-07
ZIC2	1.83189	6.91984e-05		RP11-538P18.1	-4.85059	6.07519e-07
WNT6	5.87259	6.93698e-05		COX5BP1	-5.93646	6.4019e-07
FN1	2.65363	6.9651e-05		CTC-260E6.2	-6.39223	6.45695e-07
FBLN7	3.40302	7.53103e-05		PEBP1P2	-6.47415	6.54449e-07
ITGB6	5.96454	7.91736e-05		PGK1P2	-7.36826	6.90578e-07
IL22RA1	3.28272	8.08656e-05		PTMAP2	-4.79775	7.03432e-07
GLIS3	2.98728	8.18371e-05		RP11-672L10.5	-6.39336	7.10028e-07
FOXJ1	2.0043	9.00429e-05		RPLP0P6	-4.34877	7.56804e-07
KRT17	5.48554	9.18279e-05		VDAC1P2	-5.75344	7.59585e-07
GBP2	3.73186	9.25601e-05		RPS4XP17	-6.36471	7.75859e-07
SALL1	1.54194	9.51615e-05		UBBP4	-4.07032	8.24807e-07
TNNT3	6.12708	9.64649e-05		CAP1P2	-6.08248	8.26703e-07
COL1A2	2.14223	9.71668e-05		ARSE	-3.07955	9.11833e-07
SIX6	4.60827	0.000100417		GNAI2P1	-5.7524	1.02115e-06
CHI3L2	4.10419	0.00010315		RP4-570O12.2	-6.18501	1.09798e-06
LRRC17	3.60816	0.000107613		INHBB	-4.93475	1.14067e-06
SEZ6	2.98715	0.000109002		AC006445.6	-5.73916	1.14507e-06
CERCAM	2.68894	0.000115451		RP11-829H16.2	-5.74326	1.18178e-06
C16orf45	1.57795	0.000121316		PKMP2	-6.7538	1.19882e-06
MYF6	3.39776	0.00012244		POTEKP	-7.25516	1.236e-06
COL5A1	2.59932	0.00013146		HSP90AB6P	-5.57786	1.2799e-06
MOV10	1.64824	0.000141076		MSNP1	-5.275	1.28644e-06
TIMP3	3.80916	0.000141513		AC104651.2	-5.61507	1.33122e-06
FJX1	2.11605	0.000151762		PRR13P4	-5.3069	1.36904e-06
PYGM	1.9254	0.000152279		RPL4P3	-6.32898	1.40828e-06
ATP1A2	1.90497	0.000156629		UBBP1	-6.25	1.48356e-06
DSC3	2.28097	0.000160864		AC068137.13	-5.0233	1.53603e-06
FGFBP3	1.80092	0.000163899		RPS6P12	-4.06795	1.56572e-06
TRIM55	4.07164	0.000166475		RP11-296A18.5	-7.29662	1.56843e-06
GALNT5	2.75257	0.000167812		TECRP2	-5.57415	1.59834e-06
RRAD	3.00373	0.000170776		RP11-147K6.2	-5.5953	1.62674e-06
LY6D	4.47992	0.000174222		LDHAP7	-5.92076	1.64e-06
TGFBI	4.76567	0.000175314		RPL21P6	-5.48326	1.79722e-06
CUZD1	3.9415	0.000176851		RPL10L	-7.27973	1.79731e-06
PALLD	1.53942	0.000178195		EEF1A1P29	-5.56083	1.80645e-06
COL17A1	4.61553	0.000182518		RP11-166J22.1	-5.94368	1.8348e-06
ILDR2	2.6882	0.000185548		KB-1205A7.1	-5.86959	1.90226e-06
PAMR1	2.5787	0.000199521		AC017079.3	-5.46645	1.94386e-06
LMO1	4.11025	0.000201651		OLR1	-4.98412	1.94671e-06
KANK4	3.51237	0.000212121		C1QBPP2	-5.37658	2.14679e-06
NOG	2.99122	0.000216298		TOMM20P2	-5.15098	2.37194e-06
TRIM29	5.14152	0.000216563		AC092569.2	-6.17012	2.38e-06
MAP2	3.22791	0.00021715		RP11-567G24.1	-5.40446	2.38278e-06
TNFRSF19	3.23662	0.00021731		CTD-2122P11.1	-5.13549	2.38738e-06
CRISPLD2	2.55599	0.000222739		AC114755.4	-6.01174	2.39264e-06
SLITRK2	2.89714	0.000223819		RPS3AP22	-5.0618	2.42161e-06
GGTLC2	2.84822	0.000223955		EIF4A1P6	-5.74945	2.52569e-06
LAMB3	3.33005	0.000229336		RPL24P4	-6.08632	2.7085e-06
DAZL	2.49377	0.000232676		HSPA8P14	-5.02561	2.97395e-06
TH	3.50837	0.000237964		LGMNP1	-5.15965	3.16115e-06
SMOC2	2.82646	0.000238605		RANP3	-4.89087	3.26091e-06
GPC3	1.99019	0.000239115		SERPINH1P1	-5.85492	3.39006e-06
CACNA2D4	4.70376	0.00024338		RP11-369G6.2	-4.90065	3.49307e-06
HES1	2.40055	0.000246045		RPSAP53	-5.23127	3.53542e-06
C8orf4	4.69067	0.000251127		AC010132.11	-4.71582	3.56999e-06
THSD4	1.61278	0.00025519		CPO	-5.06531	3.64329e-06
ID2	2.37865	0.000255212		RPL7P11	-5.21022	3.72427e-06
LAMA3	3.25384	0.000267297		HSPA9P1	-5.00871	4.10467e-06
WNT10A	3.52849	0.000274725		HNRNPA3P15	-4.85625	4.16854e-06
PLAGL1	2.47393	0.000284147		SHC1P2	-4.80663	4.27035e-06
GAS1	2.47592	0.00029199		HMGA1P6	-5.48042	4.38656e-06
SEMA5B	1.65666	0.000294128		MPP1	-2.69952	4.41676e-06
LOXL2	1.67217	0.000297909		VDAC1P10	-4.5905	4.44307e-06
TGM2	3.44078	0.000306387		AC016712.2	-5.10246	4.54744e-06
FZD2	2.32173	0.000311961		LINC01057	-2.73386	4.6027e-06
CDKN2A	3.22211	0.000317293		PSMD8P1	-5.10463	4.62856e-06
LMX1A	4.56853	0.000317429		NDUFB9P2	-4.91005	4.85827e-06
TGM1	2.35798	0.000323445		TESPA1	-2.90226	4.87856e-06
EPHA4	2.30963	0.000325592		ZNF578	-3.98537	4.92969e-06
KRT14	5.71915	0.000329818		RPL29P24	-5.46113	5.11533e-06
BEAN1	2.681	0.000334669		PKMP1	-6.2333	5.11995e-06
DPYSL5	1.80468	0.000343678		MMP10	-5.79333	5.17211e-06
DAPP1	3.38362	0.000345322		RP11-356M20.1	-4.7113	5.39772e-06
CDKN2B	2.6494	0.000347043		ANP32AP1	-4.52262	5.71951e-06
CNTN4	3.26346	0.000347508		RPL3P2	-3.05613	5.75173e-06
EPGN	4.91741	0.000348343		HSP90AA6P	-5.58279	6.23659e-06
BNIPL	2.90175	0.000348614		SEC63P1	-4.84537	6.29198e-06
SCN4B	2.0725	0.000360164		PRKAR1AP1	-4.49164	6.33294e-06
CDSN	6.15395	0.000360976		RP11-364L4.1	-4.38376	6.51113e-06
ZIC5	1.76248	0.000364768		IFIT2	-2.38708	6.62134e-06
THBS3	1.75048	0.000367468		RPL17P51	-4.46592	6.62322e-06
TREX1	2.4324	0.000373973		EIF4A1P10	-4.34368	6.62615e-06
CST6	3.07668	0.000378781		HRG	-3.9676	6.63579e-06
LTB	2.99963	0.000379915		RP11-77P16.1	-5.29435	6.70456e-06
POU3F1	1.60573	0.000380371		PROS2P	-4.53495	6.73085e-06
KCNN4	2.3137	0.000381203		RPS15AP9	-5.77575	6.92531e-06
HES5	3.44811	0.000381386		RPS8P3	-5.57617	6.94193e-06
SPATA31A3	3.38674	0.000386862		USH2A	-3.90954	7.06222e-06
RP11-640N20.6	2.21308	0.000390077		RP11-481K9.4	-5.55234	7.11915e-06
SCUBE3	2.14107	0.000392267		SNRPGP8	-5.19032	7.29084e-06
NPTX1	3.1274	0.000395239		RPS19P1	-4.88582	7.42564e-06
HPSE2	2.52499	0.000404789		RP1-182O16.1	-5.55033	7.54678e-06
PSG5	3.22137	0.000406229		SLC38A11	-4.70033	7.54929e-06
KRT5	5.83436	0.000414355		CCT5P2	-4.883	7.84934e-06
KRT223P	3.04764	0.000416427		RAD23BP2	-4.38672	7.9196e-06
CDKN1B	1.59663	0.000419713		CTB-85P21.1	-5.45766	8.07346e-06
AC006116.27	2.39574	0.000428527		ATP5F1P7	-4.43113	8.12393e-06
NPR3	2.81253	0.000428633		NACAP1	-4.02544	8.27549e-06
SPRR3	4.99802	0.000429467		RP6-218J18.2	-4.38855	8.45261e-06
CDH9	4.13004	0.000446744		RP11-467N20.7	-5.44888	8.53129e-06
S100A14	2.58809	0.000467158		RBBP4P2	-4.61583	8.68652e-06
ALPK2	2.55271	0.000472729		PAICSP2	-4.35474	8.72715e-06
UPK2	3.50753	0.000484374		EIF2S2P4	-4.5274	8.89694e-06
STOML3	3.54729	0.000503493		SAR1P1	-4.3637	8.92439e-06
HTRA3	2.45764	0.000503997		AC111200.7	-4.50224	9.08123e-06
BAHCC1	2.58116	0.000506419		RPL19P14	-5.51441	9.15799e-06
HIST2H4A	2.29323	0.000517228		CLIC1P1	-5.49644	9.32907e-06
MOXD1	1.91823	0.00051945		PKMP4	-5.25678	9.42515e-06
WSCD2	2.29941	0.000522886		RP11-275F13.3	-4.4979	9.54061e-06
PPP1R1B	1.56954	0.000523938		ACTG1P21	-5.03971	9.66292e-06
HMX3	3.41643	0.000550905		PRMT1P1	-5.03256	9.72555e-06
TMEM169	2.54131	0.00057219		AC009502.1	-4.46649	9.83073e-06
MSLN	4.70357	0.000577699		MAGEB17	-4.87035	9.90401e-06
NT5E	3.34117	0.000583735		SHC1P1	-5.06603	1.03874e-05
MAF	1.87528	0.000603771		BEX5	-2.58676	1.06662e-05
LHX8	3.95217	0.000606006		RP11-451J24.1	-5.75402	1.06959e-05
ADGRL4	2.62968	0.000608814		CTA-714B7.4	-4.76025	1.08791e-05
RSPO2	3.77457	0.000611208		UBE2NL	-4.42083	1.09062e-05
ZNF585B	2.07621	0.00063088		GDA	-3.56857	1.14175e-05
CTD-2514C3.1	2.89795	0.000633615		CSNK1A1L	-4.1736	1.1926e-05
EEF1E1-BLOC1S5	3.53824	0.000636027		RP3-426I6.2	-4.64622	1.19722e-05
ZNF503	3.14256	0.000643122		LEFTY2	-4.48582	1.20339e-05
MYLPF	2.6256	0.000649501		CTD-2538A21.1	-4.52822	1.39904e-05
KRT6A	6.15552	0.000666187		SLC52A3	-1.9343	1.44533e-05
DERA	1.54325	0.000675283		LRFN5	-2.84955	1.44802e-05
SORCS2	2.28687	0.000692472		HPGD	-2.24291	1.45057e-05
CRABP2	1.95605	0.000715457		TRDN	-3.13662	1.52543e-05
BST2	2.03577	0.000718364		BTF3P9	-4.64243	1.52838e-05
NEDD9	1.52965	0.000720275		RP6-29D12.3	-5.62961	1.54065e-05
C10orf107	2.66569	0.000727534		AC092573.2	-4.10951	1.65432e-05
ECM1	2.39925	0.000739562		HSP90AB3P	-3.81594	1.66574e-05
WNT5A	2.21192	0.000747618		COX6CP10	-5.0038	1.68926e-05
CAPS	1.76786	0.00074827		DNAJA1P3	-4.17166	1.70223e-05
NTM	1.52322	0.000750152		ALDOAP2	-5.04907	1.73187e-05
FXYD6	1.76148	0.000772559		PABPC3	-3.36527	1.73909e-05
PRSS23	1.54166	0.000777324		GPX1P1	-4.42662	1.74445e-05
DHRS2	2.35244	0.000783106		EEF1A1P15	-5.0414	1.79152e-05
ADAM12	3.07885	0.000790833		RPL30P14	-4.4327	1.82336e-05
GPR162	2.61766	0.000792525		PSMA6P1	-5.10245	1.87914e-05
FOXP4	1.54677	0.000799754		TCEAL5	-3.05775	1.9046e-05
FIGNL2	1.97454	0.000801438		RPSAP11	-5.69817	1.93899e-05
CEACAM21	2.49492	0.000803931		FAAH2	-2.11346	1.94506e-05
PHC2	2.16852	0.000807981		RP11-39C10.1	-5.51495	1.95005e-05
ENC1	1.62412	0.000839203		CCDC129	-3.95831	2.00596e-05
CITED2	2.15049	0.000851343		RPL36AP6	-5.42169	2.01623e-05
HS3ST5	1.96204	0.000876786		SLC25A5P5	-4.35514	2.08665e-05
TRPM3	1.69627	0.000887612		RP11-52I18.1	-4.20057	2.12262e-05
BTBD17	1.82875	0.000907299		TMEM200B	-2.10248	2.15784e-05
C11orf87	2.24827	0.000913908		RP1-319M7.2	-4.08081	2.24094e-05
FAM180A	2.63316	0.000922449		AHCYP7	-3.92943	2.28294e-05
KRT23	5.00075	0.000926827		RPL7AP38	-4.1013	2.33731e-05
LIN7A	1.60989	0.00093627		ALDH7A1P3	-3.85544	2.39444e-05
COL9A1	1.57886	0.000940454		COX6CP16	-4.20568	2.44859e-05
PCDH8	2.75336	0.000959524		PTP4A1P2	-4.61135	2.4712e-05
CLIC3	4.09778	0.000963576		DYNLL1P3	-4.22053	2.48063e-05
LHX2	2.70308	0.00097079		NCLP2	-4.81762	2.49497e-05
DLX2	2.75588	0.000971556		RP11-697N18.1	-4.01942	2.5004e-05
KLHL14	2.02549	0.000979403		VDAC2P2	-4.19578	2.50277e-05
ARID3C	3.84789	0.00097957		RAB1C	-4.73513	2.55767e-05
DUSP1	1.62419	0.000984437		RP11-322A17.1	-3.78199	2.57192e-05
PSTK	1.50474	0.00100085		RP11-329A14.2	-4.92989	2.6139e-05
SLC16A9	1.57643	0.00100431		RP13-75G22.1	-3.96784	2.61672e-05
PLAU	2.07159	0.00101095		ACTN4P1	-4.30516	2.69679e-05
SHISA2	1.79166	0.00101131		IQSEC2	-1.96178	2.70267e-05
ADGRG1	2.15054	0.00102211		SLC5A9	-3.96537	2.74935e-05
LAMC2	1.72659	0.00102885		HOXB6	-3.83803	2.86975e-05
BOC	2.37976	0.00103228		EEF1A1P24	-3.99109	2.87428e-05
HHIP	2.26123	0.00106281		PHKA1	-1.91863	2.95901e-05
LRRC4	1.93519	0.00107447		ELL2P1	-4.41177	2.96136e-05
DMRTA2	2.95091	0.0010781		HOXC6	-4.35117	2.97331e-05
HDC	3.25514	0.0010833		HOXC10	-4.7726	2.98299e-05
VTCN1	4.72126	0.00108988		SEPT7P7	-3.88911	3.01068e-05
CTB-60B18.15	2.3963	0.00111875		ACADL	-3.19466	3.0601e-05
NECAB2	2.28311	0.00113444		RP11-168J18.6	-4.48618	3.13807e-05
ARL4C	1.85527	0.00113994		CTD-2620I22.2	-4.05066	3.15781e-05
TTYH1	1.51708	0.00115043		SMPX	-3.78758	3.32414e-05
RHBDL3	1.99536	0.00115382		RP11-286H14.4	-4.56627	3.34181e-05
NID2	1.9352	0.00116072		RP11-446E9.1	-4.45729	3.41406e-05
LUM	3.89222	0.00116193		AC079305.5	-4.27014	3.42775e-05
VIM	1.57	0.00116377		FKBP9P1	-4.33565	3.43068e-05
ATP10D	1.67737	0.0011933		PIN4P1	-4.5416	3.52075e-05
HAPLN1	2.76469	0.00119397		RPL34P33	-4.25634	3.54251e-05
COL13A1	1.83749	0.00120245		TWIST2	-2.63113	3.56439e-05
SSC5D	1.60824	0.00124317		RP11-30M20.1	-3.93929	3.5843e-05
POU3F4	3.125	0.0012882		POTEJ	-5.19418	3.58989e-05
TNFRSF6B	5.13051	0.00128879		CCT5P1	-4.68941	3.64703e-05
ZNF880	1.76559	0.00129867		ANP32BP1	-4.21572	3.73086e-05
TMEM132C	2.97244	0.00133517		RP11-51O6.1	-3.55611	3.77747e-05
NTF3	3.49099	0.00134152		HSPD1P2	-3.69819	3.95793e-05
SLC44A2	1.74212	0.00134923		CFL1P4	-4.3524	3.96974e-05
GABRA2	2.80338	0.00135513		SBF1P1	-3.91116	4.23394e-05
RPS27P25	2.71542	0.00136005		HOXC8	-4.39919	4.237e-05
MFGE8	1.52652	0.00136369		GOLGA6D	-3.83567	4.36454e-05
TRIL	1.52708	0.00136608		EEF1GP3	-4.26094	4.48354e-05
IRX1	3.20401	0.0013668		AC009299.4	-4.55794	4.50753e-05
LUZP2	1.73368	0.00137431		LAMC3	-2.26683	4.64699e-05
CLDN9	2.17633	0.00138307		RP11-32B5.1	-3.95041	4.65762e-05
TYRP1	3.76025	0.00140194		PCDHB5	-2.2391	4.71106e-05
C5orf38	1.88824	0.00140299		RP11-64K7.1	-4.48679	4.78238e-05
HOMEZ	1.50087	0.00141756		NPM1P52	-3.8375	4.81005e-05
RP11-478C6.6	2.51266	0.00144563		SNRPCP15	-3.59865	4.87674e-05
RP11-252P18.1	2.23444	0.00145936		OAF	-2.86709	4.91768e-05
RP11-29O6.2	2.23444	0.00145936		IMPDH1P4	-3.85922	5.0344e-05
DRD4	2.15661	0.00146487		LOXHD1	-5.13757	5.2876e-05
LFNG	1.7849	0.00149933		HOXB8	-3.88486	5.30004e-05
NPFF	3.3479	0.0015074		MAGEA2	-3.38684	5.32622e-05
OR7E91P	2.33712	0.00151463		UBBP3	-4.51663	5.41657e-05
HESX1	1.80477	0.00153582		MORC4	-2.12994	5.42514e-05
CH507-152C13.3	4.92622	0.00154099		HSPA1L	-2.99755	5.45476e-05
SRCIN1	1.80237	0.0015559		RP4-580O19.2	-4.07161	5.4662e-05
RAB7B	3.21687	0.00157723		AC005795.1	-4.46386	5.49729e-05
ARX	2.82852	0.0015946		HOXC9	-3.69583	5.54362e-05
RSPO1	2.55328	0.00159993		YWHAQP7	-3.76647	5.7071e-05
CDH6	3.18205	0.00161417		CT45A10	-4.64227	5.74831e-05
ASTN1	1.7313	0.00164011		CBR1	-1.61876	5.75522e-05
DAPL1	3.38049	0.00164581		AC083862.6	-3.81636	5.87632e-05
DUOXA1	2.81863	0.00165196		ACTG1P17	-3.11876	5.87727e-05
MFAP5	2.16243	0.00165937		HOXA5	-3.7556	5.95397e-05
ME3	1.82112	0.00170467		SYCP3	-3.69565	6.16808e-05
PAPLN	1.95258	0.00171239		RP11-549B18.3	-3.44644	6.18276e-05
GRHL3	2.63168	0.00171644		AC004920.2	-3.81417	6.20261e-05
LGI1	3.79886	0.00174881		FAM149B1P1	-3.55531	6.20933e-05
GJB3	2.77107	0.00181211		TUBB8P9	-3.57463	6.37679e-05
FAM181A	3.44502	0.00182074		EEF1A1P17	-3.22141	6.39601e-05
LGALS3BP	1.59936	0.00183668		CFP	-2.50301	6.49929e-05
NPHS2	2.1348	0.00186356		WDR82P2	-3.49313	6.67169e-05
CHCHD2P6	2.1348	0.00186356		RP11-440K22.1	-3.92253	6.77204e-05
HSPD1P21	2.1348	0.00186356		ZBTB45P2	-3.84734	6.98874e-05
SYNC	2.64189	0.00191521		RP11-235E17.2	-3.84734	6.98874e-05
BARHL1	4.74888	0.00197128		KBTBD11-OT1	-4.6246	6.99206e-05
ANXA8	2.88728	0.00201867		HOXB9	-4.08259	7.00031e-05
TEKT5	2.54544	0.00203667		RP11-697E2.7	-3.44641	7.03725e-05
GLIPR2	1.88228	0.0020521		DPP3P1	-4.14231	7.10506e-05
BMP3	2.53396	0.00209902		NUS1P1	-4.08643	7.12477e-05
POU3F2	2.482	0.00210929		PA2G4P2	-4.30571	7.41022e-05
AC006449.2	2.60152	0.00211534		AC064850.4	-3.75097	7.45649e-05
AC006449.1	2.60152	0.00211534		VAV1	-2.34537	7.68544e-05
ANXA8L1	3.03002	0.00214717		EEF1DP3	-4.69208	7.7463e-05
FOSL2	1.55718	0.00216989		TUBBP10	-4.0316	7.92356e-05
ACOT12	2.44558	0.0021837		BHMT2	-2.75331	7.9678e-05
TMEM173	2.16899	0.00220444		RP11-512F24.1	-4.27206	8.08018e-05
HSPB7	2.79971	0.00221607		AC009413.2	-3.80568	8.09544e-05
MAPK10	1.91312	0.00225987		KRT16P2	-3.43494	8.14293e-05
FAXDC2	1.66918	0.00226438		ATP6V1E1P1	-3.49152	8.1513e-05
CYP1A1	3.97978	0.00226946		EIF4BP7	-2.8823	8.42843e-05
VIPR2	2.8533	0.00232086		TREML2	-3.80875	8.52302e-05
SDK2	2.34303	0.00232551		RANP4	-4.06848	8.71524e-05
SLITRK1	2.19933	0.00233483		RPL7AP11	-3.67587	8.79215e-05
KCNA1	2.08698	0.00233635		TUBBP8	-3.77563	8.82761e-05
GRM3	2.30067	0.00233778		RAP1AP	-3.26552	8.88196e-05
CSPG4	1.67664	0.00233922		ALDOAP1	-4.93808	8.99338e-05
MUC16	3.02616	0.00236479		CSAG2	-4.03499	9.16432e-05
PCDHGB6	1.76739	0.00250743		CLN8	-2.42315	9.17809e-05
SHANK1	1.65177	0.00257721		CCT4P1	-3.28641	9.18105e-05
KRTAP2-3	4.16972	0.00261624		MYL6P2	-4.60201	9.32069e-05
SGMS2	1.9296	0.00264609		EEF1A1P7	-3.11413	9.44406e-05
TSPAN11	2.02759	0.00267871		AIMP1P1	-3.87823	9.48786e-05
SCGN	3.15343	0.00268626		PABPC1P10	-3.37211	9.79698e-05
FOXC2	2.54444	0.00271819		GYG1P3	-3.35339	0.000100657
NCAM2	2.30962	0.00275245		DNM1P33	-3.42497	0.000101603
SP8	1.7265	0.00275664		GATA4	-4.31395	0.000102165
ZBED2	3.61118	0.00276244		BLOC1S2P1	-3.28867	0.000102615
NIPAL4	2.47626	0.00278013		PA2G4P1	-3.93913	0.000102845
GLUD1P8	1.9851	0.00279478		EIF2S2P3	-3.43315	0.000103488
AL772307.1	1.9851	0.00279478		SPOCK3	-3.41094	0.000105292
C8orf86	1.9851	0.00279478		RP11-396C23.3	-3.48749	0.000105312
RP1-139D8.6	1.9851	0.00279478		WDR44	-1.71437	0.000105429
ERP27	3.13554	0.00279563		SEPT7P8	-3.56995	0.000105545
SLAMF8	2.95547	0.00282499		RPS7P6	-3.31397	0.000105762
CCDC177	1.75831	0.00286473		TMED10P1	-4.61666	0.00010585
BCO1	2.21224	0.00288164		HOXA11	-3.82247	0.000106339
COL2A1	2.61708	0.00290797		DPT	-4.48675	0.000107706
RAB25	1.57856	0.00299725		C17orf51	-1.76676	0.000114983
GPBAR1	2.41306	0.00303639		RP11-57K17.1	-3.39792	0.000116432
VMO1	2.69926	0.00307075		HHLA1	-2.3668	0.00011741
XKR5	1.82812	0.00310091		SPIN4	-1.79809	0.000118272
SLITRK6	3.18406	0.0031955		RP11-344L21.1	-3.93925	0.000118448
C10orf10	1.7432	0.00331176		RGN	-2.79499	0.000120794
MAFB	1.60196	0.00331446		HNRNPA3P2	-4.17411	0.000121422
GPER1	2.03915	0.00337206		RAPSN	-3.20186	0.000123235
PKP1	2.0913	0.0033784		SLC25A5P8	-4.15468	0.000124607
OLFM3	3.15167	0.00344635		PHBP21	-3.63816	0.000124984
NR2F1	3.47062	0.00347196		RP11-241F15.9	-3.16739	0.000128728
C5orf46	2.56272	0.00347233		STK24P1	-3.16739	0.000128728
LLNLR-285B5.1	3.10311	0.00350996		XXcos-LUCA11.5	-3.16739	0.000128728
EPAS1	1.88599	0.00351703		RP1-91J24.1	-3.42905	0.000129268
SYNDIG1	1.79882	0.0035347		MMP12	-3.35738	0.000129646
CDH23	2.15106	0.00353668		GDF3	-2.57463	0.000131963
SEMA3C	1.69318	0.00353812		RP4-655L22.4	-3.49294	0.000132272
RP11-420K14.1	2.22477	0.00354115		C1DP2	-3.27583	0.000134485
MAB21L2	4.6504	0.0035501		MDGA2	-2.88082	0.000134868
PRMT8	1.71083	0.00356305		HNRNPA1P7	-3.19214	0.000136797
RP11-136C24.3	2.1537	0.00361799		ACTBL2	-3.46752	0.000139742
ZFHX4	1.54356	0.00366876		CTD-2313D3.1	-5.45259	0.000140417
HCK	1.9891	0.00368646		IL13RA1	-1.58683	0.000141869
RP11-540D14.8	1.91293	0.00374524		RP11-229A12.2	-4.24547	0.000142043
OSR1	2.90701	0.00376596		RPL10P1	-3.86247	0.000143903
RELN	3.67814	0.00379885		MT1A	-3.40993	0.00014413
LYPD1	2.03981	0.00381214		ANP32BP3	-4.51176	0.000145505
NCALD	1.52671	0.00384738		CYCSP42	-3.29915	0.000145923
RP11-478C6.5	2.42752	0.00386649		AC007238.1	-3.29915	0.000145923
C19orf33	3.22219	0.00386814		PCDH10	-1.77113	0.000147842
CAMK1G	2.45006	0.00392638		RFWD2P1	-3.22449	0.000148891
TENM2	1.70482	0.00399927		MMP13	-3.8257	0.000152121
NR2F2	1.76471	0.00400618		NPM1P49	-4.10775	0.000154522
CTGF	1.61638	0.00404187		RPL12P4	-3.24773	0.00015468
CLEC10A	3.90405	0.00405534		ABCF2P1	-3.17272	0.000155368
RTL1	2.40428	0.00408791		RIOK3P1	-3.17272	0.000155368
NCF2	1.97084	0.00413383		CASP10	-1.74534	0.00015555
TBX18	1.79463	0.00413438		TGIF1P1	-3.19542	0.000157451
PAX2	3.42652	0.00418645		HNRNPCP10	-3.91336	0.000158682
EPN3	1.71656	0.00421776		TPTEP1	-1.8616	0.000158689
HILS1	2.1715	0.00423242		EIF3EP1	-2.75255	0.00015964
PPP1R14C	1.83788	0.00424767		RP11-298I3.5	-5.11165	0.000161233
FLRT3	2.23543	0.00425001		FOXA2	-3.29211	0.000165211
CSF1R	2.05735	0.00428096		RP11-560G2.2	-4.12327	0.00016697
PTGES	1.60344	0.00432492		CTC-512J14.7	-4.29424	0.000167339
EFNA1	1.69536	0.00439255		FGF7	-2.65914	0.00016876
TMEM265	2.7369	0.00440419		MT1JP	-3.39196	0.000169462
IL1R1	1.99792	0.00440699		RP11-553L6.3	-3.10972	0.000170514
BAALC	1.66088	0.00455172		PES1P2	-3.41227	0.000170977
ADGRF5	3.55753	0.00464591		RP11-126D17.1	-3.46842	0.000171014
HMGB2P1	2.00787	0.00465507		RP11-44N17.1	-3.09484	0.000174046
NCR3	2.05365	0.00465713		HNRNPA1P43	-3.82257	0.000174647
AL049829.1	2.02552	0.00467358		RP11-438L7.3	-3.88639	0.000174714
RP11-162P23.2	3.31512	0.0046992		RP11-482L11.1	-3.14891	0.000175208
CTD-2138O14.1	1.99395	0.00477593		NBEAL1	-2.06064	0.000176745
PCDHGB7	1.58164	0.00478517		PRSS21	-3.07657	0.000180028
IL36RN	2.94562	0.00492734		SDC4P	-3.51825	0.000181162
FNDC7	1.97776	0.00496206		SAPCD2	-1.58178	0.000184706
SEZ6L	2.48586	0.00498689		UAP1L1	-1.99261	0.000195314
XAGE2	3.249	0.00498959		BRDT	-3.11769	0.000201015
WNT4	2.2677	0.00499332		RP11-718B12.1	-3.09799	0.000202564
IFIH1	1.68789	0.00500144		CASP12	-3.04889	0.00020598
DBX1	2.33007	0.00502168		GREM2	-2.44438	0.000207075
TNXB	2.03187	0.00505212		ADH1B	-3.19049	0.000207551
WNT11	2.14295	0.00505508		AKR1B10	-4.11131	0.000207664
TLR4	1.69286	0.00506206		MT1F	-2.03197	0.000210637
TCTE1	2.24035	0.00508273		CCT8P1	-3.08978	0.000212101
CXCR5	4.96067	0.00515702		RP11-516A11.1	-3.69986	0.00021332
CYP26A1	1.68881	0.00525272		KDR	-1.51146	0.00021606
MAP6	2.24176	0.00530985		NMD3P1	-2.99849	0.000216231
ARL4AP2	2.30003	0.00531002		SNX18P7	-2.98803	0.000216905
DRD2	1.87641	0.00533553		AC006026.9	-2.98803	0.000216905
AC007318.5	2.51772	0.00535974		ZNF600	-2.30808	0.000217316
COX6B2	1.77755	0.00538809		ACTR3P3	-3.62077	0.000219172
ID4	2.08462	0.0054008		RP11-18B16.1	-3.07148	0.000220115
FAM198B	1.75024	0.0054282		KDELC1P1	-3.07148	0.000220115
LRRC4B	1.86028	0.0054671		EDNRB	-1.91889	0.000220319
VGLL1	3.91769	0.00546917		SNRPCP8	-3.87884	0.00022155
FOLR1	2.64406	0.00550425		RP11-72K17.1	-2.96858	0.000222732
LMO3	2.15714	0.00550543		TCEAL2	-1.84362	0.000228625
FAM84A	1.72377	0.00551581		HMGB1P12	-3.22691	0.000230866
WNT7B	2.83847	0.00551863		SUCLA2P3	-3.66907	0.000231187
JPH2	1.93661	0.00552405		RCC2P4	-2.97066	0.000232932
AC068533.7	3.58762	0.00553117		AC016716.1	-2.97066	0.000232932
LA16c-380H5.3	1.66096	0.00555222		C1orf61	-2.34501	0.000238483
DLX5	4.06151	0.00559185		RP11-295H24.3	-3.08681	0.000243726
FRZB	2.07933	0.00566129		KRT8P48	-3.12806	0.000243926
AC254944.1	2.1918	0.00569669		PPP2R2C	-2.18377	0.000243966
RP11-546B8.5	2.02054	0.00571294		EIF5P1	-3.04959	0.000248883
PLA2G2F	2.02054	0.00571294		ACTBP11	-3.93636	0.000249712
CNTN3	2.64939	0.00580783		CSHL1	-3.59767	0.000252877
GSX1	2.70451	0.00582911		RP11-1029M24.4	-3.41816	0.000253719
RBBP8NL	3.60739	0.00585502		AC091654.7	-4.02645	0.000257788
KRT7	2.32617	0.00591282		PIWIL1	-3.04164	0.000268005
HMCN2	1.79933	0.00593374		PLBD1	-1.54709	0.000268168
DGKI	1.8851	0.0059737		MTHFD1P1	-2.99071	0.000270085
NECTIN4	2.02686	0.00606935		SLC9A2	-2.97267	0.00027102
RP13-582O9.6	3.12388	0.0062538		RP11-360K13.2	-3.10197	0.000272571
ART4	2.63091	0.0062603		RP3-507I15.1	-3.75786	0.000274608
EMP1	2.14998	0.00627339		MC2R	-2.88887	0.000275895
SERPINE1	2.52205	0.00627361		GTF2IP9	-2.88887	0.000275895
ABLIM3	2.27843	0.00627867		PRSS41	-3.12729	0.000277028
TPBG	1.5681	0.00632901		RP11-524L6.2	-3.84132	0.000277856
RP3-347M6.1	1.88102	0.00638776		PLSCR2	-3.51334	0.000279745
KLHDC7B	2.55844	0.00643903		RP11-8J9.5	-2.84409	0.000280912
SSTR3	2.40577	0.00644062		ANKRD20A8P	-3.15557	0.000281762
SERPINB5	2.32612	0.00647665		RP5-934G17.6	-3.48172	0.000283858
ANPEP	1.5848	0.00652897		RP11-490K7.1	-2.87289	0.000286007
FOXL1	1.64421	0.00660284		VEGFD	-3.60801	0.000287427
C6orf118	2.47619	0.00661681		RP11-716A19.3	-3.05867	0.000287809
KCNJ15	2.01404	0.0068079		RAP1BP1	-3.25534	0.000288731
KCNA5	1.93577	0.0069909		DHX9P1	-3.33624	0.000290158
RPL12P16	2.9778	0.00713461		CTD-2311M21.2	-2.17124	0.000290772
KCNJ13	2.23146	0.00713507		HNRNPA3P16	-3.73712	0.000296399
SDHDP6	2.20807	0.00720028		SAA2	-4.51394	0.000297607
AC011530.4	2.43298	0.00723965		ADCY8	-1.97985	0.000303105
HAND1	3.59301	0.00726712		CSH2	-3.32662	0.000304415
PCDHGC4	1.63285	0.00731439		RANP6	-3.21974	0.000305785
WNT1	4.77374	0.00735648		HSPE1P9	-2.97862	0.000310017
ROPN1	2.06434	0.00741312		IL23A	-2.04092	0.000312829
CAMK2A	1.92799	0.00742698		NPM1P30	-3.20987	0.000313889
RP11-96L14.8	1.75935	0.00751328		CD180	-3.3271	0.00031397
CH17-385C13.2	1.75935	0.00751328		SUCLG2P2	-2.89608	0.000316204
RPL5P34	1.75935	0.00751328		AFG3L2P1	-2.83063	0.000317859
AC010091.1	1.75935	0.00751328		RP11-274B18.3	-2.87779	0.000319314
CDC37P1	1.75935	0.00751328		FARSBP1	-2.87779	0.000319314
NPM1P38	1.75935	0.00751328		SRP72P1	-2.87779	0.000319314
RPL21P67	1.75935	0.00751328		TFF1	-2.74158	0.000320986
CRYL1	1.64981	0.0075141		DEC1	-2.35783	0.000325888
UPK1B	2.67138	0.00753149		GS1-590J6.2	-3.35212	0.00032589
CXCL8	3.61337	0.00755615		CDK7PS	-3.19555	0.000326819
GLUD2	1.99162	0.00761193		POU2AF1	-2.41151	0.000328518
RP11-977G19.10	1.77488	0.00765035		CYCSP45	-2.76873	0.000328651
CTNNA2	1.78419	0.00765393		CALM2P3	-3.10347	0.00033052
CDH20	1.79618	0.00771758		SUPT16HP1	-3.10347	0.00033052
LRRC24	2.01787	0.007829		FOXQ1	-3.26779	0.000337019
CFAP77	2.08407	0.00784802		RP1-101G11.2	-3.40196	0.000344207
AC006486.9	3.83657	0.00790869		NPM1P37	-3.30676	0.000345831
MFNG	1.91721	0.00808537		HOXA13	-3.06237	0.000359298
DLL1	1.72469	0.00817433		STEAP4	-3.24405	0.000360337
ST8SIA6	1.71472	0.00819219		CNN2P10	-3.71817	0.000361603
TINCR	1.67831	0.00819385		CBR3	-2.31998	0.000366452
NRCAM	1.60938	0.00821424		CER1	-3.08873	0.000366963
TMEM114	1.88259	0.00822925		NEDD4	-1.87625	0.000372335
GABRG1	3.26062	0.00836341		FCF1P6	-2.88231	0.00037622
BANF1P2	2.57799	0.00839463		RP11-164H5.1	-3.49748	0.000378028
PTPRT	2.7815	0.00849169		MGAT4A	-2.2766	0.000394022
PTPRO	1.9237	0.00866133		CDV3P1	-2.75168	0.000399983
KIRREL3	2.09065	0.00868265		TYRO3P	-3.24736	0.000404173
CABP7	2.12339	0.00893227		RP11-367O10.1	-3.07114	0.000409003
SKIDA1	1.71705	0.00903298		TNPO1P3	-3.07114	0.000409003
RP11-544M22.13	2.01085	0.00904842		MRPL2P1	-3.71086	0.000411977
AQP1	3.11535	0.00912502		TMC8	-2.60769	0.000415412
AL513412.1	3.24498	0.00916509		FAM120C	-1.52255	0.000432153
CYP26B1	2.37246	0.00918302		RENBP	-2.04049	0.000432284
ANKK1	2.43966	0.00923846		EIF1P4	-3.14852	0.000436015
RHCG	2.14767	0.00946508		MAGEE1	-1.50353	0.000440382
CDH10	1.88459	0.00952091		CD300E	-4.03625	0.000447441
BMS1P13	2.41064	0.00957305		CT45A1	-2.67426	0.000448983
GALP	4.69463	0.00978673		RP11-429H5.1	-3.16054	0.000456007
RP11-295K3.1	2.18268	0.00993439		RPLP0P11	-3.16054	0.000456007
TMEM119	1.76539	0.00993561		RP3-467N11.2	-2.93564	0.000456536
CPA4	2.96091	0.00998361		CYBB	-3.40689	0.000456663
CGB8	3.04334	0.0100993		TUBB8P6	-3.39645	0.000457415
SFTPA2	1.98368	0.0101407		C4orf51	-3.90309	0.000459123
AC104532.2	3.35529	0.0102431		HCLS1	-2.03091	0.000459598
MGLL	2.23281	0.0102613		ASB9	-1.95998	0.000462687
ZNF385D	1.52988	0.0104238		ENTPD2	-1.86134	0.000465103
TBX2	3.13756	0.0105056		EVI2A	-3.19439	0.000466179
DACH1	2.04648	0.0105962		AC109631.1	-2.7107	0.000467342
PAX8	3.12751	0.0106459		CDX4	-2.64347	0.000475415
METTL11B	2.2287	0.0106534		PPEF1	-3.17266	0.00047615
BNC1	1.9769	0.010731		OR10A3	-3.06342	0.000483325
C17orf96	1.7754	0.0107845		SERBP1P6	-3.0117	0.000485747
SMIM5	2.1893	0.0108478		AP000593.5	-2.90991	0.000487312
GDF6	1.91104	0.0108514		SMARCE1P3	-2.90991	0.000487312
MYF5	2.40226	0.0109087		DPPA2	-1.82245	0.000489832
KCNH1	2.77382	0.0109288		AC006028.11	-3.30129	0.000489933
ZNF436	1.50694	0.010981		GRIA3	-1.71517	0.000492803
ZNF705A	1.77193	0.0111628		GBP4	-2.09961	0.000493237
MIP	2.27113	0.0113117		ITM2A	-1.96145	0.000497135
WFIKKN1	1.63758	0.0113163		LCE1D	-2.99384	0.00049874
SLC16A4	1.61525	0.0113353		PRG4	-2.80892	0.000499599
KCNC3	1.53796	0.0114245		API5P1	-2.80892	0.000499599
TM4SF1	2.23678	0.011444		CCDC58P5	-2.80892	0.000499599
PDYN	1.69166	0.0115596		GJA6P	-2.80892	0.000499599
SERPINB7	3.48409	0.0115601		KLHL34	-2.40164	0.00050844
MAP1LC3C	1.54691	0.0116313		RP3-406A7.3	-3.33744	0.000513351
PLAUR	1.58275	0.0116353		BCAS2P2	-2.76179	0.000524104
XCR1	2.17323	0.011642		GAB3	-2.1683	0.000525027
ALOX15	1.6825	0.0116604		SNX6P1	-3.00074	0.000532498
WNT7A	2.17913	0.0117781		GUCY1B2	-2.72004	0.000534094
AC037459.4	1.95888	0.0121406		CDR1	-2.60066	0.000544048
NNMT	2.90906	0.0121591		AZIN2	-2.25926	0.000546712
TMEM88	1.87584	0.0122258		RPRM	-1.6316	0.000553226
CLEC7A	1.81207	0.0122477		OMD	-2.58141	0.000556452
CTB-60B18.23	2.44727	0.0122904		SUPT20HL2	-3.93742	0.000562061
SPAG6	2.43456	0.0124513		RPL5P8	-3.28362	0.00058504
OTOF	2.49065	0.012492		AC104131.1	-3.66197	0.000585201
MEIS2	2.30433	0.0125119		ARL2BPP2	-3.18396	0.000587203
RPL18AP3	2.75377	0.0125846		PCSK9	-1.96146	0.000589374
CTD-2116N17.1	2.15478	0.0125907		EIF3LP3	-3.30374	0.000590332
ACKR2	1.51264	0.0126023		POSTN	-2.20154	0.000599441
ULBP2	2.8687	0.0126133		RBPJP6	-2.88189	0.000599708
UNC5C	1.99814	0.0126312		BZW1P1	-2.7631	0.000601907
CSF2RB	2.01745	0.0126401		WNT3	-2.04797	0.000603902
NEUROG3	2.02029	0.0126914		ADAMTS16	-1.69705	0.000612902
RP11-497H16.5	2.43709	0.0127816		SDHDP2	-3.23399	0.000624437
ITGA11	1.95027	0.0128266		SLCO4A1	-1.8264	0.00062971
PRSS57	2.07085	0.0129218		SMARCE1P5	-3.09776	0.000634384
RPL29P19	1.99777	0.0130718		PNKDP1	-2.81722	0.00064372
WNT8B	1.56493	0.0131988		RPL15P1	-2.71626	0.000643734
CCDC92	2.04069	0.0132045		CSPG4P13	-2.71626	0.000643734
C11orf96	1.61366	0.0132046		CYP4F23P	-2.71626	0.000643734
MORN5	2.23885	0.0132619		LLNLF-176F2.1	-2.04207	0.000647422
SLC38A3	1.74342	0.0133653		FRMPD4	-3.51204	0.000648121
SECTM1	1.83867	0.0133862		RP11-384B12.2	-3.04789	0.000651251
CH17-260O16.1	2.62272	0.0134818		WISP2	-3.00978	0.000662991
PGLYRP4	2.62272	0.0134818		ERAS	-3.21921	0.000664916
TMSB4XP1	2.10847	0.013517		RP11-613H2.2	-3.06685	0.000671461
ZNF467	2.0641	0.0135469		CSNK2A3	-3.62733	0.000683935
DKKL1	1.51296	0.0138243		FCF1P4	-3.34609	0.000692044
FAM69C	2.65194	0.0138966		HOXA10	-3.16249	0.000696998
UROC1	1.6329	0.0140522		ICAM3	-1.52571	0.000697112
RP4-595K12.2	1.6329	0.0140522		AL161905.1	-3.32099	0.000703302
SERPINA9	3.05354	0.0140607		RP1-261D10.1	-2.58953	0.000705831
ST13P4	1.98475	0.0140948		RBMXP1	-2.9033	0.000722549
TRBJ2-2P	1.98475	0.0140948		CLUHP6	-3.13294	0.000730673
CBLN4	2.19705	0.0140965		RPL36AP53	-3.75757	0.000733591
CNTN6	2.24437	0.0141811		RP11-342M1.7	-3.07904	0.000747077
ENDOU	2.93535	0.0142889		YY2	-2.7316	0.000751702
IGFBP5	2.05373	0.0145576		VTA1P2	-2.58941	0.000759928
IL1A	1.58551	0.0146562		ATXN3	-2.05078	0.000768436
SPATA31A7	1.91551	0.014809		COPS5P1	-2.59399	0.000775501
MYL3	1.89783	0.0148697		CDC42P6	-3.39374	0.000787363
UCMA	1.74152	0.0150179		PCED1B	-1.69176	0.000798143
EDN3	2.5731	0.0151867		AC006987.4	-3.31393	0.000800007
SIRPAP1	1.91866	0.0153634		MIXL1	-2.66885	0.00080129
KLHL10	1.88716	0.0153777		SLC25A14P1	-2.46535	0.000816723
VWF	2.13969	0.0154175		RP11-185N2.1	-2.46535	0.000816723
TACSTD2	2.38019	0.0154432		BRD7P5	-2.46535	0.000816723
RP11-640N20.9	2.46045	0.0155123		TAS2R15P	-2.46535	0.000816723
CRYBA1	2.33606	0.0156296		LA16c-60G3.7	-2.46535	0.000816723
PRDM12	2.18528	0.0158183		HNRNPKP3	-2.46535	0.000816723
ACTC1	1.50823	0.0158448		RP11-430C1.2	-2.51206	0.000821853
STK32A	1.55899	0.0159574		AHCYP5	-3.28351	0.000822333
CD24P4	1.81915	0.0161		RP11-325P15.2	-2.97196	0.000824255
EREG	2.30256	0.0161119		AC016577.1	-1.72597	0.000827975
TCP11	2.01657	0.0161814		TUBB8P7	-2.03295	0.000833328
CFTR	2.61563	0.0162332		GLIPR1L1	-2.34641	0.00083499
RP11-140L24.4	3.19194	0.0162749		GRAMD4P3	-2.68865	0.000853061
ZNF536	2.17327	0.0164157		RP11-571E6.1	-2.82795	0.000867616
RPS4XP13	2.14422	0.016546		APOL6	-1.64898	0.000871012
SLC6A16	1.57484	0.016637		RP11-265B8.5	-2.73173	0.000894126
DMBX1	2.92208	0.0167978		RP11-615I2.3	-2.9659	0.000898758
ACTG2	2.10123	0.0168115		ABCA8	-2.46639	0.000900062
CD274	2.69652	0.0173044		CPA6	-3.05156	0.000903841
MYO7B	2.60229	0.0173472		KRR1P1	-2.54905	0.00091975
ZAR1	1.81912	0.0173806		NXF2B	-3.16514	0.0009278
F13A1	2.33523	0.0174235		ETV4	-1.62992	0.000928422
GUCY1B3	1.68445	0.0179805		HNRNPKP1	-3.05259	0.0009291
FGF3	2.5918	0.0180066		GAPDHP62	-3.02412	0.000935567
RP11-807H22.6	2.94578	0.0181222		CTB-52I2.4	-2.49099	0.000938496
TMEM132E	2.04767	0.0182567		PITX2	-2.04227	0.000939906
CCIN	1.91673	0.0186432		HSH2D	-1.94486	0.000947588
SPRR1B	3.00962	0.0186481		AC073065.3	-2.5388	0.000956548
GATA3	2.89659	0.0189293		RP4-814D15.2	-2.41937	0.000966481
TMEM40	2.12011	0.0190736		LRTM1	-2.41937	0.000966481
RP11-613M10.9	2.27285	0.0191185		OLIG1	-2.84733	0.00097223
TTC29	1.96054	0.0191407		NFIA	-2.83483	0.000974978
EBF4	1.61206	0.0194047		CRYGB	-3.03537	0.00097854
TTR	3.19171	0.0202412		PLEKHS1	-3.40972	0.000978633
FNDC1	2.09356	0.0202692		TBC1D8B	-2.1077	0.000979287
MMRN1	3.73638	0.0203724		HSPD1P1	-3.43249	0.000980364
NXPH2	2.13626	0.0204954		TEX13C	-2.33105	0.000992087
ENKUR	1.82363	0.0206767		AC073109.2	-2.70142	0.000994274
HMGCLL1	2.32613	0.0208254		RP11-157J24.1	-2.60084	0.000998712
ZNF354C	1.85875	0.0208999		ITGB2	-1.98055	0.00102654
COX4I1P2	1.93737	0.0209411		RP11-555H23.1	-2.47369	0.00102865
DCST2	2.04156	0.0210518		RPL21P13	-2.78533	0.0010468
NOD2	1.78955	0.0211358		PITPNM2	-1.57783	0.00106257
KLHL38	1.84448	0.0211917		RP11-400K9.2	-3.5315	0.00106848
SMIM11B	1.69398	0.0212943		NUPR1	-2.21795	0.00108409
HK2P1	1.6691	0.0214107		AC226119.4	-2.6712	0.00111013
RP11-346I3.2	1.6691	0.0214107		HERC2P5	-2.49176	0.00112433
ETV3L	1.99975	0.0215631		MPEG1	-2.92102	0.00112945
ADGRF4	2.70013	0.0218023		SDF2L1	-1.57427	0.00113046
CH17-13I23.3	1.78717	0.0218317		CTD-2179L22.1	-2.59447	0.00113322
ODF3B	2.21423	0.0219163		NPM1P26	-2.60305	0.00114114
SCEL	2.89544	0.0221785		CTD-2647E9.1	-2.53676	0.00114174
SLC22A7	1.67942	0.0223707		RP11-804H8.5	-2.81699	0.00115381
RLBP1	2.5321	0.0224076		CTC-448F2.6	-2.81699	0.00115381
MICAL2	1.86129	0.0224159		CLRN1	-2.8494	0.00115677
EDN2	2.25786	0.0225594		AF111168.1	-2.44257	0.00115819
STPG2	1.6434	0.0226861		POTEF	-2.88462	0.00115871
TFAP2A	2.77529	0.0227559		SCGB3A2	-2.13764	0.00116053
KCNIP1	1.69178	0.0228045		RP3-339A18.3	-2.6069	0.00116159
SLC38A8	2.33301	0.0230455		RPS4XP10	-3.05253	0.00116162
KCND3	1.69172	0.0234198		WDR72	-1.78618	0.00116388
SPATA31A6	2.79972	0.0235663		HNRNPA1P8	-2.70775	0.00116759
RPS2P32	2.16921	0.0237752		SCARF1	-1.92976	0.0011757
IP6K3	1.88777	0.02395		XIAP	-1.54016	0.00118337
MSX2	2.46065	0.0241536		SYCP2	-2.72663	0.00118722
CXCL2	1.57219	0.0242906		ST13P18	-2.98887	0.00118992
LA16c-306E5.1	1.56975	0.0243888		DPP3P2	-2.91982	0.0011912
RPL23AP92	1.56975	0.0243888		LRRC3	-1.62602	0.00119189
GBP3	1.8536	0.0243924		SHROOM4	-1.703	0.00119879
GJA10	2.46638	0.0245378		RP4-775C13.1	-3.04533	0.00120489
ABCA12	1.9663	0.0246744		GAPDHP37	-2.65984	0.00121043
RGS22	1.91099	0.0251577		CTAGE4	-1.91294	0.00121664
HIST1H2AD	1.97681	0.0251644		TPSB2	-2.67654	0.00124753
ANKRD1	1.83412	0.0256621		RP11-506H20.2	-2.48037	0.00124772
AC027612.6	1.98278	0.0258444		PROK1	-2.48037	0.00124772
BIK	1.52396	0.0258986		CTB-158E9.2	-2.48037	0.00124772
RGCC	1.58748	0.0260159		S1PR5	-1.70908	0.00125497
PSD2	1.62004	0.026144		PMPCAP1	-3.20529	0.00126546
FAM196B	1.79793	0.0261821		THEG	-2.50505	0.00126672
RPS11P6	1.81813	0.0263064		GP6	-2.29218	0.00126821
NAALADL2	1.52086	0.0263332		GOT2P2	-2.8206	0.00127908
RP11-96L14.7	2.2177	0.0264566		RP11-603K19.1	-2.6634	0.0012865
ANKRD30B	1.65499	0.0264597		LRRC34	-1.66385	0.00129008
IL11	1.62579	0.0265895		MAGEA12	-2.91196	0.0012929
GPR55	1.73889	0.0267045		PPEF2	-2.03058	0.00129946
RPL35P5	1.73889	0.0267045		CTD-2545M3.6	-4.13088	0.00130129
KLHL30	2.25075	0.026975		NRN1	-2.27991	0.00130398
LHX4	2.21135	0.0270161		UBE2L4	-3.17175	0.00130447
RNF223	2.13172	0.0273737		RHBDF1P1	-2.71281	0.00130458
GPR142	1.74069	0.0276628		RAB17	-2.58546	0.00130943
ASTL	1.60277	0.0278293		CTNNAP1	-2.30357	0.00132205
GCKR	1.97266	0.0280617		RP11-687F6.4	-2.30357	0.00132205
HRH1	1.61181	0.0281435		KRT17P7	-2.7158	0.0013257
AC004231.7	3.11066	0.028292		ACTG1P10	-2.2496	0.00133934
PDE3A	1.76182	0.0284291		H3F3C	-3.0287	0.00134111
PENK	1.80863	0.0285322		STARD8	-1.88738	0.00135639
WBP1LP2	1.58736	0.028835		API5P2	-2.44373	0.00136178
RPL29P12	1.50337	0.02937		UBE2D3P2	-2.44373	0.00136178
IL31RA	1.50337	0.02937		AZGP1P1	-2.47637	0.00136492
RPSAP17	1.50337	0.02937		PF4	-2.80524	0.00137008
TMEM71	1.50337	0.02937		CYP2B6	-2.7583	0.00138262
FAIM2	1.75453	0.0298567		SOCS5P5	-2.43114	0.00138436
S100A3	1.65692	0.0300055		OR5P3	-2.43114	0.00138436
CYP4A22	2.70883	0.0302545		ALOX15B	-3.27918	0.00138561
HTR1A	1.78394	0.030375		PIP5K1P1	-3.00152	0.00138852
PDZK1P1	2.49766	0.0305168		RP11-795H16.2	-2.41529	0.00139825
GAPDHP33	1.59509	0.0305762		HOXD8	-3.17299	0.00139896
OR52K3P	1.59509	0.0305762		SLITRK4	-1.62225	0.00140189
GC	1.59509	0.0305762		NPM2	-2.45088	0.00143358
ADRA2A	1.60979	0.0305889		RASAL3	-1.82837	0.00143997
BLOC1S5-TXNDC5	4.02925	0.031006		GUCY2F	-2.92529	0.00144133
SYT10	1.8205	0.0312051		LRRK1	-1.90047	0.00145228
ABCA4	1.86498	0.0314037		GSC	-3.13571	0.00145304
BAK1P1	1.76534	0.0315025		PGM5P2	-2.68695	0.00146649
RP11-100N21.1	1.65568	0.0317893		PSAT1P2	-3.08476	0.0014732
RP11-178C3.8	2.11844	0.0320896		TFCP2L1	-2.04683	0.00148751
RP5-994D16.12	2.01357	0.0322928		NRSN1	-3.17851	0.00149531
DRD5	1.83473	0.032429		APOOL	-1.59587	0.00150252
COX7A2P1	1.5314	0.0324613		PALMD	-2.75447	0.00151822
MYH7	2.27728	0.032932		VDAC1P11	-2.51217	0.00155993
CIDEB	2.69815	0.0331607		INTS4P2	-2.51217	0.00155993
CCDC140	2.63476	0.0337567		AC104389.32	-2.80788	0.00157322
ERAP2	1.51351	0.0339879		ABHD12B	-2.09965	0.00157612
SYCE3	2.20423	0.0352049		DUSP9	-1.54979	0.00157882
DKK1	2.63712	0.0353012		TRPA1	-2.18121	0.00159437
NEUROG2	1.64341	0.0353518		TIMP4	-2.06528	0.00159443
AC073551.1	1.79361	0.0354019		AC125238.2	-2.76462	0.00159743
AC090498.1	2.16163	0.0358378		AC112497.1	-1.83857	0.00160221
P2RX3	2.19146	0.0358422		RP11-51L5.5	-2.32246	0.00160933
RPL10AP6	1.78153	0.0361041		GPR149	-2.32246	0.00160933
ADAMTS18	1.81	0.0362809		AC007899.3	-2.32246	0.00160933
RP11-153M3.1	1.73085	0.0363732		DNM1P46	-2.78409	0.00161096
KRT33B	1.73085	0.0363732		RP13-228J13.5	-2.50454	0.00161218
EN2	1.9806	0.0367755		HMCN1	-1.59852	0.00161835
RGS4	2.06023	0.0369017		FAM78B	-1.53997	0.00162437
DEFB4B	1.61031	0.0369799		NLRP7	-2.29278	0.00165337
YWHABP2	1.61031	0.0369799		RP11-299H22.3	-2.82738	0.00165542
PEG3	1.67103	0.0372397		CDK5PS	-2.7067	0.00166114
WLS	1.95616	0.0372866		SDCCAG8	-1.50032	0.00167732
HBZ	1.94877	0.037299		ONECUT1	-2.34969	0.00168108
REG4	1.94877	0.037299		GP2	-3.50684	0.00168707
CYP17A1	1.51364	0.0376556		NDUFB4P11	-2.74792	0.00169156
RP13-130D24.1	1.51034	0.0376734		MT1M	-2.45771	0.00169421
PXDNL	1.78189	0.0385162		RP11-172C16.4	-2.74176	0.00171322
MEIOB	1.54228	0.0386212		CD7	-2.3054	0.00173052
CTB-33G10.1	1.95729	0.0388655		PDE6G	-1.54223	0.00173322
SERPINB2	3.73298	0.0388883		PLA2G5	-2.35336	0.00176487
RPL7AP30	1.56169	0.0395021		PHF2P2	-2.35336	0.00176487
NPAS4	1.86266	0.0395102		LDLRAD4	-2.83428	0.00177387
CLDN4	1.58213	0.0395736		ZFP92	-1.98904	0.00180242
SLX1B	2.34275	0.0396685		CHMP1B2P	-2.28789	0.00180766
A2M	2.01454	0.039849		HIST1H2BB	-3.28163	0.00182218
ACSM1	2.444	0.0403813		RP11-815J4.5	-2.88034	0.00182294
SMYD1	2.22782	0.0410667		RP13-33H18.1	-2.3487	0.00182491
CXorf49B	1.97634	0.0412938		FAM157A	-1.77063	0.0018264
CXorf49	1.97634	0.0412938		ZNF444P1	-2.65716	0.00185096
ROBO4	2.18169	0.0418784		CSMD1	-2.29989	0.00187039
BLNK	1.71353	0.0425372		RP11-54I5.1	-2.57969	0.00190993
SLC39A2	2.13335	0.0425377		FOLH1B	-2.35652	0.00191255
KRT34	4.43093	0.042573		NUTF2P6	-2.25599	0.00191923
ZNF763	1.76923	0.04325		IMMTP1	-2.44584	0.00194137
RFX4	1.88317	0.0433869		NUS1P4	-2.44584	0.00194137
SLAMF9	2.08236	0.0434431		AC010240.2	-2.44584	0.00194137
PYDC1	1.56848	0.0436284		RP11-627K11.1	-2.44584	0.00194137
IFI6	1.85187	0.0438193		PARP15	-2.60995	0.00194248
SLIT1	1.64542	0.0440049		MEPE	-2.47893	0.00198014
ATP6V1G2-DDX39B	3.99059	0.044056		ACTG1P11	-2.56345	0.00198923
DASS-161H22.6	3.99059	0.044056		ACTG1P2	-2.56345	0.00198923
RP11-468E2.2	2.41231	0.0441825		TARDBPP1	-2.31911	0.0019954
SGCA	1.5816	0.0443259		FABP3P2	-2.31911	0.0019954
C1orf105	1.78698	0.0445247		TLK1P1	-2.31911	0.0019954
PGAM1P6	1.78698	0.0445247		HOXD10	-2.51352	0.00199803
TNFRSF4	1.95992	0.0452395		AC006987.5	-2.54683	0.00200077
HCG4P3	1.78366	0.0452804		SEC1P	-2.07191	0.00201727
ACPT	1.85357	0.0453309		RPL7P57	-2.73241	0.00202304
SERPINA2	1.94709	0.0455047		CBX3P5	-2.94047	0.00202884
GPR61	2.08624	0.0461242		DSEL	-1.66582	0.00206641
CLVS1	2.05923	0.046395		ENO1P1	-1.78873	0.0020805
DLX3	2.57892	0.0467484		HOXA9	-2.63072	0.00210624
C1QL4	2.17359	0.0470111		RP11-161H23.10	-2.63361	0.00210644
AQP9	2.00641	0.047183		GSTM5P1	-2.20619	0.00210669
HCG22	1.78786	0.0473357		RPL7AP6	-2.07402	0.00210812
NWD2	1.78786	0.0473357		LIPJ	-2.78915	0.00211786
MTCYBP14	1.62653	0.0480975		RP1-190J20.2	-2.20644	0.0021201
MYOZ2	1.6552	0.0490187		RPS4XP1	-2.20644	0.0021201
C4orf26	1.99002	0.0490747		AC016549.1	-2.20644	0.0021201
C1orf87	1.60229	0.0491344		CYP4F11	-2.5638	0.00212452
VN1R108P	1.73154	0.0494239		IFIT1P1	-2.32907	0.00212485
SPRR2A	1.81079	0.0499184		ECM1P2	-2.32907	0.00212485
CH507-42P11.2	1.81079	0.0499184		ABCC9	-2.20849	0.00213706
PLCH2	1.60653	0.0499803		CCDC172	-1.70814	0.0021401
				RP11-104D3.2	-2.60809	0.00214208
				HOXB7	-2.73415	0.00215969
				OR5H8	-2.53555	0.00216747
				MAPRE1P1	-2.43642	0.00217737
				GPR34	-2.43642	0.00217737
				PDZD4	-2.03244	0.00218013
				HSPD1P5	-2.49386	0.00220342
				CSH1	-2.25758	0.00222773
				ACHE	-1.63597	0.00222782
				BNIP3P1	-3.93766	0.00223031
				TRAPPC3L	-1.89412	0.00224526
				RP11-153M7.3	-2.39624	0.00228331
				MAGEB2	-2.76406	0.00230998
				ALG1L7P	-2.62841	0.00232651
				SGCD	-2.2698	0.00232811
				WASF4P	-2.15884	0.00233407
				GABBR2	-1.52288	0.00236729
				IGBP1P4	-2.471	0.00239152
				HNRNPA1P46	-2.57222	0.00239616
				RPSAP15	-2.5507	0.00240183
				RP11-347C12.12	-2.16004	0.00240508
				CTB-25J19.1	-2.16004	0.00240508
				AC111200.2	-2.16004	0.00240508
				NLRP4	-2.14894	0.00240652
				RPS3AP42	-2.14894	0.00240652
				FAM58DP	-2.14894	0.00240652
				CTB-95D12.1	-2.14894	0.00240652
				AC090602.2	-2.14894	0.00240652
				CTD-3236F5.1	-2.14894	0.00240652
				MANEAL	-1.56147	0.00244756
				FKBP1C	-2.40347	0.00245878
				RP11-471G13.2	-2.65634	0.0024653
				RP11-420L9.2	-2.56957	0.00247262
				UGT3A1	-1.55542	0.00247983
				MT3	-2.65152	0.0024838
				ARRB1	-2.35222	0.00251785
				BSND	-2.30962	0.00252057
				ISCA2P1	-2.77215	0.00252165
				LRRK2	-2.45571	0.00253753
				FOXF2	-2.344	0.00254161
				RP1-290F12.3	-2.92598	0.00255462
				FGF17	-3.4659	0.00261667
				LIMS4	-2.46704	0.00265274
				RP6-191P20.3	-2.34302	0.00269195
				RP11-1081M5.3	-2.34302	0.00269195
				CTC-448F2.3	-2.34302	0.00269195
				EEF1A1P16	-2.44508	0.00269791
				GBP6	-2.25376	0.00273693
				TNR	-2.14102	0.00274474
				NTS	-2.10153	0.00278898
				RP3-509L4.3	-2.84691	0.00280296
				HHLA2	-1.57777	0.00282185
				IL16	-2.82802	0.00282904
				AC010970.2	-2.2149	0.00283067
				PRELID1P4	-2.08606	0.00283098
				PABPC1P4	-2.38718	0.00283387
				RNF5P1	-2.26593	0.00283389
				EIF2S3L	-2.26593	0.00283389
				RNF126P1	-2.13809	0.00285498
				C9orf153	-2.51748	0.00285763
				LST1	-2.10376	0.00285936
				SOWAHD	-1.55528	0.00286439
				CNTD2	-1.71753	0.00287872
				TBX15	-1.97443	0.00288108
				ADGRE1	-2.18608	0.00288418
				HERC2P8	-2.37477	0.00289572
				EIF4BP6	-2.8723	0.00291515
				LAMA2	-1.55119	0.00293288
				PROZ	-2.45628	0.0029602
				TNFSF14	-3.10901	0.00297073
				ARL6IP1P1	-2.04418	0.0029915
				RP4-764D2.1	-2.04418	0.0029915
				GMNC	-2.04418	0.0029915
				FTH1P11	-2.04418	0.0029915
				FTH1P1	-2.04418	0.0029915
				NBPF20	-1.65755	0.00304106
				ACE2	-3.66745	0.00305804
				RP11-168P6.2	-3.08797	0.00306503
				GAL	-2.04276	0.00306611
				EOMES	-2.50948	0.00311438
				HIST1H2BN	-1.64733	0.00312848
				APBB1IP	-1.73553	0.00313142
				ASPN	-3.26628	0.00316271
				NPIPB15	-1.72747	0.00316343
				GOLGA8J	-2.22246	0.00316956
				AC080125.1	-2.17347	0.00317122
				MTRNR2L5	-2.17347	0.00317122
				NSRP1P1	-2.17347	0.00317122
				CXorf65	-2.46085	0.00318998
				C1orf162	-2.78487	0.00320633
				TNFRSF13B	-2.97754	0.00320983
				MTCO1P24	-2.58863	0.00322425
				RP11-203L2.3	-2.27063	0.0032556
				OR4A14P	-2.35935	0.00327165
				TUBB7P	-2.96417	0.00329652
				CALB1	-1.74686	0.00331018
				RPL7P14	-2.45672	0.00331139
				ICAM2	-1.98513	0.00334654
				AC105402.3	-2.22849	0.0033503
				RP1-136J15.5	-2.22849	0.0033503
				RP11-364B14.3	-1.7493	0.00337347
				HS6ST1P1	-2.68999	0.00341178
				VSIG1	-1.735	0.00347674
				VTI1BP1	-2.5935	0.00348723
				CTC-250P20.2	-2.5935	0.00348723
				DNMT3L	-2.14976	0.0035127
				SCGB1D2	-3.87169	0.00353158
				TNFSF9	-1.6051	0.00355796
				RP11-163G10.2	-2.37106	0.00356005
				AC006539.2	-2.20085	0.00356291
				C9orf152	-2.54216	0.00357256
				CD19	-1.69616	0.00360437
				ARMCX4	-1.50275	0.00360909
				PNPT1P1	-2.05148	0.00362288
				RP11-1070B7.1	-2.05148	0.00362288
				RP11-582E3.4	-2.18857	0.00362407
				SLC3A1	-2.23751	0.0036245
				PMM2	-1.60193	0.00363321
				GPC4	-1.5045	0.00364424
				RP11-382D8.5	-2.21614	0.00365089
				RP13-88F20.1	-2.15263	0.00366339
				LGALS12	-1.95681	0.0036873
				VCX	-2.26646	0.00372663
				MYCT1	-2.5536	0.00376978
				KCNG4	-2.09547	0.00378691
				TLL1	-2.77521	0.00380411
				EEF1A1P38	-2.01601	0.00381334
				IGHA2	-3.27063	0.00382461
				CFAP100	-3.0925	0.00386699
				FSCN1P1	-2.45938	0.00387138
				ZNF808	-1.60786	0.00389194
				AIRE	-2.08839	0.00390938
				RBM46	-2.32632	0.00392115
				RP11-447H19.1	-2.32354	0.00392518
				HBA2	-2.05422	0.00394096
				CALML5	-3.47499	0.00395338
				RP11-7D5.2	-2.73985	0.00396
				RIMKLBP2	-2.66418	0.00396801
				DSCAM	-2.25198	0.00396925
				RP11-57C19.2	-2.05795	0.00397725
				CCR3	-2.05795	0.00397725
				SEPT7P6	-2.05795	0.00397725
				LARP4P	-2.05795	0.00397725
				AC002543.2	-2.05795	0.00397725
				SPDYE2	-2.95535	0.00398469
				CLNK	-2.63155	0.00398679
				SLC5A1	-2.2172	0.00399925
				CHST9	-1.7017	0.00403117
				EEF1DP5	-3.00351	0.00404797
				NRK	-2.42686	0.00404818
				FAM163A	-2.49434	0.00406035
				SEC14L4	-1.86246	0.0040645
				HP	-1.98294	0.00411448
				SCML2P1	-2.34852	0.0041339
				AL590235.1	-2.24562	0.0041419
				CCDC81	-2.30006	0.00415116
				SOX18	-2.28457	0.00415269
				MTRNR2L13	-3.13609	0.00424699
				C9orf84	-2.21986	0.00432147
				RLN2	-1.97029	0.0043283
				SDCCAG3P2	-2.47365	0.00436623
				C1GALT1P1	-2.52894	0.00437628
				ACTG1P9	-2.35669	0.00439011
				C12orf50	-1.98138	0.00439337
				IZUMO2	-1.63535	0.00440821
				HOXD9	-2.3728	0.00440825
				CD93	-2.69675	0.0044479
				XAF1	-1.70947	0.00450817
				FOXP2	-2.13941	0.00459884
				NODAL	-2.7383	0.00460677
				ZNF525	-1.57591	0.00462136
				C10orf90	-2.23999	0.00463455
				SV2C	-2.04377	0.00464335
				CCDC144A	-1.86706	0.00469811
				RP11-432M8.17	-2.24622	0.00470727
				DNAJB1P1	-2.24622	0.00470727
				USP50	-2.24622	0.00470727
				RPS6P20	-2.40068	0.00470818
				CYP2B7P	-3.57683	0.00474731
				MARK2P8	-1.88957	0.00476699
				CACYBPP1	-1.88957	0.00476699
				LINC00264	-1.88957	0.00476699
				AC018442.1	-1.88957	0.00476699
				SNRPCP2	-1.88957	0.00476699
				RPL23AP35	-1.88957	0.00476699
				MOGAT1	-1.88957	0.00476699
				PON3	-2.24032	0.00482402
				HLA-F	-1.60349	0.00484517
				RP11-956A19.1	-2.2421	0.00485422
				FPR3	-2.2421	0.00485422
				KHDC1L	-2.29281	0.00485686
				RP11-597D13.7	-2.50391	0.00487212
				RIT2	-2.26652	0.00488037
				PARP1P1	-2.29075	0.00489513
				RP11-129H15.4	-2.70099	0.00496848
				ACTG1P12	-3.28936	0.00497548
				TEX101	-2.21966	0.00501425
				CHIAP2	-3.26241	0.00502358
				GTSF1	-1.74629	0.00502398
				SLC26A5	-2.14246	0.00503156
				MDS2	-2.14246	0.00503156
				VN1R2	-2.17305	0.00505059
				RP3-454G6.2	-2.63545	0.00505155
				RP11-85G20.2	-2.24562	0.00507356
				SMARCE1P1	-2.19666	0.00509823
				ITLN2	-1.58631	0.00511753
				RP11-215A19.2	-2.11216	0.00516936
				PCDHA13	-1.68378	0.00520261
				FAM153A	-2.47712	0.00521378
				RP4-809F18.1	-2.40388	0.00523163
				GLRA3	-2.22797	0.00527122
				ITGAL	-2.06399	0.00530555
				FAM83F	-1.53772	0.00532083
				SOCS5P4	-2.42341	0.00532574
				RFPL2	-2.60374	0.00537558
				GHR	-1.75097	0.00539725
				FGF8	-2.30202	0.00541326
				RP11-240B13.2	-1.85396	0.0054165
				SLCO4C1	-1.82757	0.00546135
				FAM81A	-1.85042	0.00547211
				PRSS30P	-2.44508	0.00549226
				RP11-434I12.5	-2.20134	0.00549412
				AHCYP2	-2.58858	0.00549614
				AL360294.1	-2.21553	0.00550936
				OLA1P1	-2.52628	0.00553089
				BX842568.2	-1.84089	0.00553383
				PRAC1	-2.07432	0.00554616
				PRPF38AP1	-2.07432	0.00554616
				EVX2	-2.07432	0.00554616
				VTI1BP3	-2.07432	0.00554616
				UBASH3A	-2.07432	0.00554616
				RNMTL1P2	-2.07432	0.00554616
				AC097523.3	-2.07432	0.00554616
				TTC4P1	-2.07432	0.00554616
				RHOXF1	-2.1976	0.00556365
				CRLF1	-1.54673	0.00557322
				PDXDC2P	-1.52228	0.00558366
				AC129492.1	-3.39853	0.00561054
				DPY19L1P2	-2.73748	0.00563865
				AC002310.17	-2.21948	0.00564762
				AJAP1	-1.7586	0.00570827
				C1QTNF3-AMACR	-3.01727	0.00577561
				DUXA	-2.07633	0.00577569
				RP11-510M2.4	-2.07633	0.00577569
				RP11-820K3.3	-2.07633	0.00577569
				GGTA1P	-2.04689	0.0057918
				AC007040.11	-2.34142	0.00579446
				RAB43P1	-3.51792	0.00581788
				CDKL4	-2.08304	0.00582518
				KHSRPP1	-2.14686	0.00588717
				BOD1L2	-2.39191	0.00588895
				AC005014.5	-2.87697	0.00589282
				HSP90AB7P	-2.4337	0.00592538
				FAM90A12P	-2.00597	0.00592631
				TIMM9P2	-2.00597	0.00592631
				CCDC187	-2.00597	0.00592631
				GAPDHP2	-2.20724	0.00595742
				ATP1B4	-2.20724	0.00595742
				PFN1P11	-2.46776	0.00602801
				HMGB3P24	-2.06522	0.00603476
				B3GAT3P1	-2.45588	0.00606205
				METTL7A	-1.59776	0.00620464
				ITPR2	-2.14525	0.00620773
				REEP1	-1.63884	0.0062403
				AC012513.4	-1.90377	0.00626982
				RPS26P3	-1.90377	0.00626982
				GAGE2A	-1.90377	0.00626982
				CYP2T3P	-1.90377	0.00626982
				BNIP3P37	-1.90377	0.00626982
				AC079112.1	-1.90377	0.00626982
				GAPDHP64	-1.90377	0.00626982
				GMCL1P1	-1.90377	0.00626982
				GAPDHP55	-1.90377	0.00626982
				RP3-510O8.3	-1.90377	0.00626982
				RP11-430C7.2	-1.91353	0.00630376
				USP26	-1.91353	0.00630376
				MRPL50P1	-1.91353	0.00630376
				AP000350.10	-3.1001	0.00633052
				ULK4P2	-2.71948	0.00634563
				RP1-22N22.1	-2.22368	0.00635287
				PAGE2	-3.10513	0.00636956
				HOXC5	-2.52147	0.00642776
				SBSPON	-1.63116	0.00644922
				TAS2R2P	-1.95077	0.00646505
				PSAT1P1	-1.95077	0.00646505
				AC000077.2	-2.21212	0.00648753
				IYD	-1.97305	0.00649164
				RP11-113I24.1	-1.71844	0.00649168
				HLA-DQA1	-1.55438	0.00655268
				HOXB13	-2.20298	0.00657801
				CYP4F12	-2.43133	0.00659452
				TPT1P9	-2.0854	0.00670009
				RP11-713P14.1	-2.0854	0.00670009
				RP11-463O9.1	-2.0854	0.00670009
				IGLC1	-2.75375	0.00670337
				RPSAP46	-2.39705	0.00672663
				CHCHD3P1	-2.36114	0.00676432
				PLA2G4B	-1.72355	0.00681498
				FSIP2	-2.23419	0.00682117
				C11orf45	-1.64831	0.00684302
				VDAC1P3	-2.36824	0.00692686
				RP11-132A1.6	-2.46963	0.00692956
				RP11-749H20.3	-2.00565	0.00693603
				HOXC11	-2.46885	0.0069492
				AC010492.2	-2.46885	0.0069492
				MAGEA6	-2.527	0.00697176
				ARHGEF15	-1.54295	0.00698759
				LMNTD1	-2.40663	0.00708327
				C11orf16	-1.8566	0.00709591
				BX842568.1	-2.43519	0.00713134
				SPINK8	-2.7624	0.00717813
				HNRNPCP7	-2.14422	0.00721491
				PABPC5	-1.63657	0.00726302
				SLC16A7	-1.6487	0.00727712
				CD163	-1.77782	0.00732093
				HCST	-1.70259	0.00734023
				HIST1H2AJ	-2.87521	0.00734538
				PDCL3P3	-1.79797	0.00734979
				AC087499.5	-1.79797	0.00734979
				AC012066.1	-1.79797	0.00734979
				OR5H6	-1.79797	0.00734979
				SP3P	-1.79797	0.00734979
				RP11-10L12.2	-1.79797	0.00734979
				MTCO2P27	-1.79797	0.00734979
				RP4-724P12.1	-1.79797	0.00734979
				HMGN2P40	-1.79797	0.00734979
				CTD-2290C23.1	-1.79797	0.00734979
				MTCO3P11	-1.79797	0.00734979
				RP11-71H17.1	-1.79797	0.00734979
				AC092798.2	-1.79797	0.00734979
				MYH13	-1.79797	0.00734979
				AZGP1	-3.78478	0.00735347
				CD79B	-1.981	0.00747383
				OR52A1	-2.60372	0.00753244
				CD226	-2.31504	0.00753295
				ZFYVE28	-1.81438	0.00754207
				CTD-2537I9.19	-1.86022	0.00757462
				DNAJC19P9	-2.31879	0.00760833
				LHFPL1	-1.59979	0.00765094
				SYT5	-1.58067	0.00769295
				PFN1P10	-2.80856	0.00770271
				EML6	-1.90546	0.00777372
				ITIH6	-1.91521	0.00777421
				RP1-28C20.1	-1.91521	0.00777421
				RP11-90D4.4	-1.91521	0.00777421
				AP1B1P2	-1.91521	0.00777421
				HPRT1P2	-1.91521	0.00777421
				RP3-400B16.2	-1.91521	0.00777421
				RP13-1056D16.2	-1.91521	0.00777421
				FAM58CP	-1.91521	0.00777421
				FAF2P1	-1.91521	0.00777421
				RP11-226E21.4	-1.92606	0.00778127
				GSTM5	-2.08013	0.00781486
				MAB21L3	-2.01793	0.00787773
				FGL1	-2.08475	0.00790004
				SH3GL1P2	-2.2001	0.00790606
				PDCL3P4	-1.99473	0.00791203
				GOLGA6L4	-1.95211	0.00792046
				FGF4	-2.08723	0.0079356
				AKAP17BP	-1.93541	0.00794985
				NR5A2	-1.81927	0.00801408
				CITED1	-1.6534	0.00807429
				SLC22A25	-1.91482	0.0080879
				NPM1P9	-1.87536	0.00814145
				BMS1P17	-2.39362	0.0081441
				BX004987.1	-2.31478	0.00814948
				NEURL1	-1.73092	0.0081552
				EYS	-1.84215	0.00816301
				RRM2P3	-2.25201	0.00818031
				GIMAP2	-2.25759	0.00819939
				GOLGA6L7P	-2.24135	0.00823744
				RP1-315G1.1	-1.81587	0.00824403
				ASS1P10	-1.81587	0.00824403
				CTD-2062A1.2	-1.81587	0.00824403
				NPAP1	-1.95868	0.00825251
				LINC00431	-1.94542	0.00833243
				TDRD1	-2.21717	0.00833953
				TREML1	-2.02815	0.00836815
				RP11-674I16.1	-2.16538	0.00845238
				RP11-730G20.2	-2.10286	0.00849954
				ENPP7P1	-2.28879	0.00864405
				LEFTY1	-3.35042	0.00865824
				RHOXF1P1	-2.75824	0.00869627
				CYSLTR1	-1.91999	0.00871097
				RP11-231C18.3	-2.9951	0.00872769
				KCNJ3	-2.79142	0.00886688
				ZNF799	-1.58381	0.00895332
				RAET1E	-2.06133	0.00900851
				IGHA1	-4.2464	0.00902608
				RP11-631M21.7	-1.83488	0.00903422
				C14orf105	-1.83488	0.00903422
				RP11-258C19.4	-2.16323	0.00904047
				RP11-40A7.2	-2.38549	0.00906563
				FBXL21	-1.77375	0.00912988
				DNM1P47	-1.93025	0.00913201
				DUX4L9	-2.69751	0.0091462
				C17orf99	-2.01446	0.00914972
				RP11-311P8.2	-2.27728	0.00915051
				OC90	-2.10653	0.00917109
				BUB1B-PAK6	-3.55529	0.00920159
				MID2	-1.64488	0.00921447
				AC005682.6	-2.07089	0.00921447
				RP13-93L13.2	-2.31397	0.00926135
				RP11-216M21.1	-2.13756	0.00929073
				ANXA13	-2.10905	0.009308
				MDN1	-1.68743	0.00931074
				MSR1	-2.42526	0.00935634
				CXorf67	-2.67206	0.00941698
				AC026271.5	-2.26382	0.00941907
				AC090945.1	-1.89407	0.00950839
				TFF3	-1.56348	0.00951873
				ITGB1BP2	-2.21528	0.0095638
				EBF1	-1.94856	0.00959474
				AC009263.2	-1.82359	0.00967184
				DST	-1.59943	0.00967285
				CASQ1	-1.63812	0.00970064
				RP11-436M15.1	-2.03431	0.00972999
				EVI2B	-2.1934	0.0097321
				STK31	-2.11773	0.00975977
				ULK4P3	-2.85243	0.00981322
				PDE6C	-1.83877	0.00988949
				RP4-744I24.4	-1.93796	0.00989003
				PTPRVP	-2.23241	0.00996561
				ADAM29	-2.22351	0.0100331
				SAGE1	-2.43083	0.0100965
				MOG	-1.75788	0.0101363
				FCGR1A	-2.29538	0.0102214
				NPM1P39	-2.28568	0.0102268
				NHS	-1.5778	0.0102419
				ACRC	-1.92947	0.0102593
				OR2A42	-2.37584	0.0103317
				KLK2	-1.99563	0.0103391
				OR2A1	-2.44635	0.0104152
				RP11-390M11.1	-1.64374	0.0104843
				RP11-562A8.1	-1.64374	0.0104843
				TRPC5OS	-1.64374	0.0104843
				TRIM51BP	-1.64374	0.0104843
				SLC31A1P1	-1.64374	0.0104843
				RPS2P35	-1.64374	0.0104843
				RP11-642E20.3	-1.64374	0.0104843
				AC004980.10	-1.64374	0.0104843
				AC243790.1	-1.64374	0.0104843
				ANAPC10P1	-1.64374	0.0104843
				BTF3P6	-1.64374	0.0104843
				CCDC168	-1.64374	0.0104843
				CLEC4C	-1.64374	0.0104843
				CTC-235G5.2	-1.64374	0.0104843
				CTD-2553L13.7	-1.64374	0.0104843
				CTD-2666L21.2	-1.64374	0.0104843
				GPR21	-1.64374	0.0104843
				HMGN2P17	-1.64374	0.0104843
				RAD17P1	-1.64374	0.0104843
				RP11-274B21.13	-1.64374	0.0104843
				RP11-548K12.1	-1.64374	0.0104843
				RP11-411B10.8	-1.85292	0.0105868
				CLCA3P	-1.81726	0.0106292
				RPSAP69	-1.81726	0.0106292
				IAPP	-1.81726	0.0106292
				STRA8	-1.81726	0.0106292
				ZFP3	-1.66888	0.0106301
				CNR1	-1.52799	0.0106525
				SLC40A1	-2.38063	0.0106782
				MRPS18AP1	-2.07189	0.0106866
				ACSM4	-2.82622	0.0107127
				RP11-99A14.1	-1.76162	0.0107383
				ZIM3	-1.76162	0.0107383
				HNF4A	-2.79701	0.0107703
				RP11-403I13.9	-1.80482	0.0108701
				HOXA7	-2.21234	0.0108721
				RP11-69L16.5	-1.71459	0.0108921
				ATP2B3	-2.41122	0.0109012
				NANOG	-1.65364	0.0109148
				AKR1D1	-2.06451	0.0109876
				TRPM2	-1.90865	0.0110642
				ACSM2A	-1.63761	0.0110998
				RP11-12A20.7	-2.02256	0.0111203
				CDHR4	-1.8487	0.0111647
				STX16-NPEPL1	-2.39783	0.0112094
				PABPC1L2B	-2.46438	0.0112629
				AC139143.2	-1.91635	0.0113364
				RASL10A	-2.1489	0.0113574
				LRRC69	-1.84907	0.011498
				RP11-544O24.2	-2.07938	0.0115213
				CHRM5	-1.9241	0.0115249
				MTND5P11	-2.22112	0.0116317
				NUTF2P7	-2.06733	0.0116547
				RBM44	-2.50352	0.0116557
				CHAD	-1.7876	0.011678
				SLC6A14	-1.76582	0.0116848
				RP11-177C12.4	-2.70595	0.0117453
				NMNAT3	-1.51649	0.0117702
				TRPC5	-1.65927	0.0117941
				SLC15A1	-1.79799	0.0118249
				SIDT1	-2.3285	0.0118557
				CYP4F3	-2.04083	0.011911
				PLEK	-2.30598	0.011922
				C4BPB	-1.80002	0.0119787
				RP11-428L21.2	-1.85036	0.011981
				CTC-756D1.1	-2.17799	0.0120788
				GOT2P3	-2.40997	0.0121282
				HOXC4	-1.77496	0.0121571
				RYKP1	-1.84436	0.0121667
				OVCH2	-1.86585	0.0121975
				CTSLP2	-1.78791	0.0122387
				PCDHGA1	-1.88832	0.0122612
				MAGEA4	-1.71443	0.0122765
				ZAP70	-3.01704	0.0123534
				BTBD10P1	-1.66914	0.0124256
				RP13-672B3.2	-1.66914	0.0124256
				TRGV3	-1.66914	0.0124256
				MS4A7	-2.28363	0.0124891
				IFITM4P	-2.11222	0.0125605
				RP11-248C1.3	-2.09131	0.0125844
				RPL7AP60	-2.19404	0.0126241
				MEFV	-1.84534	0.0126466
				LINC01207	-1.87383	0.0126466
				RP11-393K19.1	-1.65549	0.0126495
				SLC6A20	-1.50518	0.0127727
				MARCH11	-1.6851	0.0127971
				MNX1	-2.13253	0.0128427
				RP11-290H9.2	-3.59772	0.0128739
				PALM2	-2.43422	0.0129017
				RAB11FIP1P1	-2.66371	0.0129177
				IKBKGP1	-1.72262	0.0129368
				MUC5B	-1.74876	0.0129725
				UNC93B6	-2.37364	0.0129876
				RP11-109N23.6	-1.77391	0.0130465
				AC004893.10	-2.08952	0.0130921
				RPL17P26	-1.65577	0.0131319
				CA1	-1.65577	0.0131319
				KRTAP10-3	-1.65577	0.0131319
				SDR9C7	-1.65577	0.0131319
				ERP29P1	-1.65577	0.0131319
				IGLV2-23	-1.65577	0.0131319
				AWAT2	-1.65577	0.0131319
				HMGB3P6	-1.65577	0.0131319
				BTBD6P1	-1.65577	0.0131319
				ANKRD7	-1.65577	0.0131319
				TIMD4	-1.65577	0.0131319
				IGLV3-19	-2.58887	0.0131377
				PTPN22	-2.03013	0.0132389
				ADAM32	-1.57247	0.013276
				CTAGE1	-1.95976	0.0132826
				HSF4	-1.64238	0.0133778
				GBA3	-2.04376	0.013427
				RP11-641C17.1	-2.33096	0.0135278
				TMEM45B	-2.15407	0.0135745
				PSAPL1	-2.17074	0.0135867
				THRSP	-2.70991	0.0136712
				C2orf88	-1.66653	0.0137557
				LLNLF-173C4.2	-3.76267	0.0138503
				DOCK11P1	-1.94097	0.013855
				AC131097.4	-2.05343	0.0139088
				ARR3	-2.09322	0.0140833
				MROH7	-1.98002	0.0141992
				RERG	-1.82573	0.014209
				RNASE1	-2.53755	0.014241
				OR1F1	-1.8881	0.0142937
				RP11-344H11.5	-2.81117	0.0143114
				CD163L1	-1.82259	0.0143718
				PDE7B	-2.86311	0.0143727
				RP5-966M1.4	-1.96828	0.0144027
				CYP4B1	-1.96828	0.0144027
				RP11-967K21.2	-1.96828	0.0144027
				CSAG1	-1.82229	0.0144083
				ZPBP2	-2.09016	0.0145175
				C1orf64	-2.17498	0.0145494
				HOXA6	-2.06952	0.0145574
				RP11-392E22.9	-1.70025	0.0145574
				RP13-313G19.2	-1.84123	0.0146649
				ME2P1	-1.84123	0.0146649
				RP4-654C18.1	-1.84123	0.0146649
				VSIG2	-1.71747	0.0146738
				ECM2	-1.90782	0.0146792
				CXorf36	-1.78428	0.0146883
				GPRIN3	-2.0495	0.0146945
				AVP	-1.86879	0.0147032
				SHOX2	-2.34293	0.0147673
				FOXL2NB	-2.16769	0.0148735
				SPACA4	-2.03914	0.01495
				PGPEP1L	-2.03415	0.0150871
				CFL1P5	-1.73742	0.0152284
				CD33	-1.73742	0.0152284
				ANGPTL7	-2.03577	0.0152436
				AP006285.2	-1.77107	0.0154055
				AP006285.1	-1.77107	0.0154055
				FBXW10	-1.73436	0.015408
				AZGP1P2	-1.73436	0.015408
				RP5-966M1.7	-1.67225	0.0155029
				SPINK9	-2.16616	0.0155414
				IL2RG	-1.62089	0.0155765
				GOLGA6C	-2.45636	0.0156672
				YWHABP1	-2.6958	0.0157465
				AC026248.1	-1.50705	0.0158211
				GUCY2D	-2.10738	0.0158406
				PATE4	-1.96304	0.0159025
				TRIM6-TRIM34	-2.42727	0.0159121
				PMP2	-1.55361	0.0161271
				MAN1A2P1	-2.34654	0.0161446
				HTR5A	-3.11801	0.0161902
				RP11-254B13.4	-1.67069	0.016248
				RP11-775J23.2	-1.67069	0.016248
				RPS6P16	-1.67069	0.016248
				CTD-2132H18.3	-1.67069	0.016248
				RP11-241J12.3	-1.67069	0.016248
				FPR2	-1.67069	0.016248
				PTGES3P2	-1.67069	0.016248
				AC007163.1	-1.67069	0.016248
				C11orf21	-1.67069	0.016248
				PDC	-1.67069	0.016248
				ATP5A1P7	-4.19963	0.0163083
				RP11-288H12.3	-1.62005	0.016379
				TCL1A	-1.69707	0.0163829
				TUBB8P1	-1.89206	0.0164797
				CSAG3	-1.96352	0.0165558
				TM6SF1	-1.69398	0.0166744
				PRDM9	-2.19618	0.0166972
				OR2A7	-1.53124	0.0167739
				IL15RA	-1.8619	0.0167884
				CT45A5	-1.86783	0.0168699
				GABRE	-2.03919	0.0169047
				RP11-34P13.16	-2.17808	0.0169249
				AP002962.1	-2.45018	0.0170079
				SCGB2A2	-4.43779	0.0170321
				RP11-122L4.2	-2.15691	0.0171744
				ERBB4	-2.28088	0.0172701
				NCF1B	-2.35869	0.0174654
				RPL31P11	-1.78283	0.0174905
				SLAMF7	-2.01857	0.0175596
				ZNF528	-2.01917	0.0176372
				NXPH1	-1.69282	0.0176537
				SMCO2	-1.69282	0.0176537
				KRT18P17	-1.96318	0.0176557
				NUTM2E	-1.86765	0.0177045
				CTB-75G16.1	-1.8677	0.0177423
				EEF1GP5	-1.8677	0.0177423
				SPDYE11	-1.86774	0.0178011
				SPDYE9P	-1.86774	0.0178011
				MZB1	-2.56505	0.0178911
				PCDHA5	-1.7704	0.017915
				NLRP12	-1.83799	0.0180641
				GCOM1	-2.44393	0.0181107
				PYY2	-1.65753	0.0181296
				MEI1	-1.76477	0.0182074
				ABO	-1.9408	0.018276
				MCF2	-1.95359	0.0183134
				TMEM56-RWDD3	-1.94195	0.018386
				VPS13C	-1.63169	0.0184822
				TMEM63A	-1.65765	0.018566
				GPT	-2.07692	0.0187242
				RP11-3K24.1	-1.81764	0.0187388
				FLI1	-1.57025	0.018753
				SULT1B1	-2.35689	0.01879
				ACSL5	-2.54251	0.018832
				IGLL5	-2.3714	0.0189522
				RP11-65E22.2	-1.76852	0.0189651
				RP5-1155K23.4	-2.11219	0.0189952
				T	-2.74659	0.0190757
				DNAJC19P5	-1.57633	0.0191845
				PTPRC	-2.43308	0.0192815
				RP5-1041C10.3	-2.13142	0.0193075
				CLEC2B	-1.79414	0.0193264
				EIF1AXP1	-3.09356	0.0193721
				PRR29	-1.78495	0.0194538
				KB-1125A3.13	-1.86775	0.0194856
				HSP90AA5P	-2.82654	0.0195237
				SPDYE10P	-2.78041	0.0195494
				HMGA1P1	-2.13054	0.019681
				AP000351.13	-2.19809	0.0197458
				NEPNP	-1.79082	0.0198368
				RP11-345K20.2	-1.56594	0.0198482
				AC008746.5	-1.56594	0.0198482
				GATA1	-1.56594	0.0198482
				UBE2Q2P1	-1.95455	0.0200179
				TNFAIP8L2	-1.90958	0.020306
				SRPK3	-1.83196	0.0203862
				CXCR6	-1.79654	0.0205439
				ONECUT2	-1.55079	0.0205501
				VWA3B	-2.43828	0.0205963
				AACSP1	-2.22157	0.0206234
				RP1-217P22.2	-1.86721	0.0207985
				MARCKSL1P2	-1.86721	0.0207985
				ANKUB1	-2.19858	0.0208357
				EIF4A1P2	-1.92831	0.0209219
				PDK4	-1.60244	0.0209858
				ALG1L15P	-1.90477	0.0212886
				GPS2P1	-2.11418	0.0214591
				PF4V1	-1.92609	0.0215033
				CPN2	-1.64452	0.0215338
				KRT16P3	-2.31411	0.021615
				OR2W3	-2.20316	0.0216293
				CNTD1	-1.7388	0.021674
				NCLP1	-2.06382	0.0217103
				AVPR2	-1.60124	0.0217172
				IFNL3P1	-1.70171	0.0218798
				AC008072.1	-1.83889	0.0219094
				GBP1P1	-1.70495	0.0219603
				KIAA2022	-1.64158	0.0222393
				TAC4	-2.03672	0.0222816
				LRRTM2	-2.27212	0.0224501
				RP11-813P10.2	-2.19201	0.0225186
				RP11-404K5.1	-1.7783	0.022782
				AC104534.3	-2.55587	0.0228974
				AL365202.1	-1.94694	0.0230158
				TRPM6	-1.52357	0.0231104
				FAM169B	-2.25777	0.0232636
				MYLK2	-2.49098	0.0233274
				NKAPL	-1.7161	0.0233598
				CEACAM5	-1.57756	0.0234479
				CTC-459F4.6	-1.85735	0.0235761
				LANCL3	-1.5265	0.0236377
				RPL39P36	-1.78596	0.0238603
				GATA6	-2.23597	0.0238663
				GCSAML	-1.80786	0.0239831
				GPR6	-1.66049	0.0240724
				ABCA13	-1.53902	0.0240974
				HNRNPA3P1	-1.89823	0.0241887
				AP000351.3	-1.57735	0.0242785
				SIGLEC17P	-1.57735	0.0242785
				C1DP1	-1.99804	0.0243147
				TBC1D3P5	-1.99804	0.0243147
				CXCL9	-3.34142	0.0243978
				CD3E	-2.13444	0.0244563
				MAGEB1	-1.66725	0.0245383
				TRPC7	-1.92573	0.0245762
				CCR8	-1.6987	0.024698
				AC131263.1	-1.65959	0.0247137
				CTC-559E9.13	-1.65959	0.0247137
				RP11-380G5.3	-1.65959	0.0247137
				PFN1P4	-1.65959	0.0247137
				FAM9C	-1.55147	0.0247222
				NLRP11	-1.8269	0.0248065
				IGSF10	-1.64882	0.0251947
				NAP1L4P1	-1.58053	0.0252456
				KCNJ10	-1.79097	0.0252557
				GRM7	-1.56022	0.025371
				NR0B1	-2.31392	0.0256063
				AC018892.9	-1.59361	0.0257606
				RPL7AP2	-1.59361	0.0257606
				HNRNPH1P3	-1.59361	0.0257606
				RPL36AP15	-1.59361	0.0257606
				RP11-213G2.1	-1.59361	0.0257606
				HTR2A	-1.59361	0.0257606
				RP3-352A20.1	-2.28696	0.0258394
				RP11-777B9.5	-4.68877	0.0259814
				REXO1L1P	-1.62528	0.0259907
				RP11-264F23.1	-3.4677	0.026015
				SPATA2P1	-1.72307	0.02604
				ASB14	-2.07171	0.0260571
				RPL12P21	-1.58224	0.026084
				PLEKHA3P1	-1.58224	0.026084
				NECAP1P1	-1.58224	0.026084
				HTN1	-1.74448	0.0261111
				RPL9P29	-1.61668	0.0261806
				NXF3	-1.9227	0.0262586
				FCRL5	-1.59703	0.0264328
				CALHM1	-1.83995	0.0264541
				SLPI	-3.06734	0.0266796
				PRDM7	-1.5193	0.0266952
				HOXD11	-2.23572	0.0267895
				SLFN12L	-1.5103	0.0268276
				DDX50P1	-1.67146	0.0270254
				RP11-887P2.3	-1.85415	0.0271244
				KLF18	-1.69101	0.0271871
				WFDC10B	-1.67561	0.0272606
				TTLL13P	-1.78591	0.0273235
				MFSD1P1	-1.81774	0.0273329
				CAPN8	-1.63394	0.0273688
				C1QB	-2.69385	0.0273814
				IGFL4	-1.65142	0.027424
				ANKRD20A5P	-1.58727	0.0274468
				SUCLG2P4	-1.58927	0.0275604
				RP11-586E1.1	-1.5167	0.0276195
				COX20P2	-1.5167	0.0276195
				RP11-415I12.2	-1.5167	0.0276195
				AP000859.4	-1.5167	0.0276195
				BRI3BPP1	-1.5167	0.0276195
				RP11-727F15.14	-1.88701	0.0277861
				RPS3AP34	-1.9353	0.0277925
				SUMO4	-2.21404	0.02783
				TET1P1	-1.65982	0.0278752
				UBBP2	-2.01457	0.0282084
				APOD	-3.28796	0.0283601
				ARHGAP20	-1.78642	0.0285421
				CTSS	-2.23703	0.0285688
				SULT1C2P1	-1.73577	0.0286412
				AC004383.3	-1.96902	0.0288182
				HAO2	-1.83624	0.0289357
				IL7	-1.82362	0.0294021
				TUBA3D	-1.7428	0.0296833
				TUBB4AP1	-2.7529	0.0297541
				MED28P3	-1.59033	0.0297956
				PAGE2B	-2.63587	0.0297978
				RP11-536C10.3	-1.68005	0.0298094
				FAM3D	-1.75598	0.0298659
				SCGB3A1	-1.75598	0.0298659
				RP11-805L22.2	-1.86425	0.0298705
				APOC4-APOC2	-1.86425	0.0298705
				RPS15AP10	-1.76116	0.0300819
				IGLV8-61	-2.53879	0.0300901
				LRRC25	-1.65412	0.0304181
				CD84	-1.89311	0.0304966
				CLEC3A	-2.26823	0.030538
				PIP	-3.62148	0.0306583
				RP11-381E24.4	-2.03308	0.0306698
				RP11-452N17.1	-2.81493	0.0306776
				MTCO1P25	-1.77551	0.030691
				RP11-157G21.2	-2.33965	0.0307557
				PGAM1P5	-1.82179	0.0308165
				PTBP1P	-1.72553	0.0309215
				SNRPEP4	-2.3457	0.0309587
				RGPD6	-2.57061	0.0309683
				RP1-179N16.3	-1.94419	0.0311158
				TACR1	-2.26371	0.0312857
				PRDX1P1	-1.59429	0.0314507
				FTLP12	-1.68259	0.0315149
				RP11-368J21.3	-1.67225	0.0315331
				RP13-210D15.8	-1.89251	0.0315621
				CYP4F8	-2.20385	0.0315665
				PTMAP8	-1.80441	0.0315694
				HSPA8P5	-2.21346	0.031581
				POU5F1P4	-1.71054	0.0315874
				CBX3P4	-1.53399	0.0315933
				RP11-1023L17.2	-1.90518	0.0316848
				TECRP1	-3.12828	0.0316954
				RP11-174N3.4	-1.61101	0.0317549
				MAGEA3	-2.64249	0.03178
				IPO7P2	-1.76688	0.0318099
				CTD-3199J23.6	-2.05049	0.0318697
				SCN3A	-1.77962	0.0320304
				RP11-814E24.3	-2.26734	0.0321614
				AL354822.1	-1.63085	0.0322355
				HMGN1P37	-1.85827	0.0322595
				NCR1	-2.69366	0.0322694
				NUGGC	-1.55453	0.0324189
				RLIMP1	-1.59714	0.0326491
				RP5-877J2.1	-2.20236	0.0327115
				ASS1P2	-1.6439	0.0329458
				CDC27P1	-1.98913	0.0329833
				RP11-249C24.12	-2.13646	0.0330296
				GGT6	-1.62228	0.0330403
				PFN1P2	-2.26806	0.0330822
				RP11-573M3.3	-1.85975	0.0330922
				AL358852.1	-1.5859	0.0331051
				TICAM2	-2.30961	0.0331602
				CTD-2369P2.12	-1.97427	0.0332268
				AC008265.2	-1.69539	0.0333085
				RP11-93O17.2	-1.69539	0.0333085
				TMEM233	-1.83708	0.0333864
				NRBF2P1	-1.76802	0.0333937
				CTC-260E6.12	-1.76802	0.0333937
				SASH3	-2.19004	0.033503
				RP11-1016B18.1	-1.68012	0.0335035
				RP4-613B23.5	-1.98474	0.0336963
				RP11-23F23.3	-1.98474	0.0336963
				IGLV1-40	-2.3515	0.0338339
				IGLV3-10	-2.3515	0.0338339
				ACTG1P14	-1.53747	0.0339437
				DPY19L2P4	-1.59082	0.0339816
				SCN1A	-1.51976	0.0340732
				NCF1C	-1.80118	0.0340808
				RAB6C	-2.03034	0.0342593
				TMC2	-1.71889	0.0343283
				TREM2	-1.69952	0.0343439
				APOA2	-2.44265	0.0343595
				PLD4	-1.64179	0.0344391
				RP11-486O13.5	-1.59374	0.0344981
				NEB	-1.94759	0.0346185
				GRK6P1	-1.82478	0.0348247
				RPS2P48	-1.83868	0.0348647
				PIK3AP1	-1.94917	0.035013
				GLRB	-1.77118	0.0351
				RP11-266L9.1	-1.9026	0.03515
				MCOLN2	-1.61663	0.0351705
				CILP	-1.58077	0.0352341
				FCGR2A	-1.66896	0.0353176
				HIST1H2BF	-1.65743	0.0354109
				AC112229.1	-1.60257	0.0355487
				CYP3A5	-1.7554	0.0355549
				ADAM20	-1.645	0.0356451
				STK25P1	-1.645	0.0356451
				CFAP99	-1.58209	0.0357033
				SHISA8	-1.89508	0.0358838
				RPL7P50	-1.69163	0.0359119
				AC006042.8	-1.88402	0.0359208
				RPS4XP5	-1.97516	0.0362593
				VPS35P1	-1.90811	0.0364321
				RP11-486M3.3	-2.0483	0.0365168
				BNIP3P17	-2.01659	0.0365945
				TNFSF10	-2.163	0.0368163
				RP11-1012A1.7	-1.94385	0.0368736
				AL591806.1	-1.94385	0.0368736
				MAGEA9	-2.03412	0.0369385
				RP11-328C8.2	-2.03412	0.0369385
				IL6	-1.5699	0.0370458
				RUNX3	-1.58449	0.0373715
				EPPIN	-1.51115	0.03741
				RP11-392E22.5	-2.23333	0.0375784
				PSMC1P1	-3.13999	0.0378816
				MUCL1	-3.7445	0.0379371
				RP11-536L3.4	-2.0124	0.0379535
				ELF5	-1.75445	0.0383512
				MS4A6A	-1.90295	0.0384093
				SLC47A1P1	-1.59781	0.0384524
				AL138479.3	-1.59781	0.0384524
				GOLGA8O	-1.59781	0.0384524
				RP11-360O19.5	-1.59781	0.0384524
				RP11-457D20.2	-1.59781	0.0384524
				RP5-935K16.2	-1.59781	0.0384524
				RP11-60C6.8	-1.59781	0.0384524
				PCDHB1	-1.93507	0.0384945
				RP11-323I15.2	-1.93674	0.0385588
				RP5-854E16.2	-2.18872	0.0386039
				TRIM64B	-1.97343	0.038643
				RPS7P11	-1.54188	0.0392581
				LHX9	-1.63676	0.039406
				IGFALS	-1.53858	0.039418
				NCMAP	-1.61682	0.0396517
				NAA11	-1.54358	0.0396619
				RP11-348H3.5	-1.61479	0.0396818
				ALS2CR11	-1.96978	0.0397219
				RP11-599B13.6	-1.95864	0.0398613
				TGM5	-1.78972	0.0400154
				C2orf50	-1.587	0.0401104
				RAB6C-AS1	-1.80041	0.0402247
				HSP90AA4P	-2.44396	0.0402935
				IL21R	-1.80684	0.0405166
				KIAA1210	-1.54396	0.0407026
				CHTF8P1	-1.81622	0.0408049
				LYG1	-1.71338	0.0409316
				FCRL3	-1.5166	0.0409928
				AC004076.7	-2.03728	0.0410499
				BRINP3	-1.62567	0.0412214
				RP11-30L15.4	-1.88073	0.0417346
				CTD-2535L24.2	-1.81337	0.0417916
				TRPM1	-1.67013	0.0421196
				NPHP3-ACAD11	-1.87727	0.0421588
				RPL5P23	-1.60766	0.042274
				RP11-758I14.3	-2.69828	0.0424133
				HIST1H2BM	-1.81574	0.0428224
				KRT16P1	-1.80922	0.042849
				JCHAIN	-2.94627	0.0429945
				ZNF556	-1.53698	0.0429963
				KRT8P4	-2.7456	0.0431222
				GOLGA6L5P	-1.56375	0.0431979
				XXbac-B562F10.11	-1.80661	0.0432469
				FANCD2OS	-1.59354	0.0432669
				EHF	-2.89458	0.0433648
				HIST1H2BL	-1.53213	0.0435137
				MYT1L	-1.53252	0.0437208
				POTEH	-1.52539	0.0440512
				XPOTP1	-1.82905	0.0442783
				AC136616.1	-1.82905	0.0442783
				ITK	-1.59841	0.0442995
				HIST1H4B	-1.81742	0.0444028
				TP53AIP1	-1.73668	0.0447019
				RP11-114F3.5	-1.71832	0.0448501
				NLRP10	-2.41765	0.0450776
				RP11-723O4.3	-1.59394	0.0452501
				RP5-961K14.2	-1.53769	0.0453722
				SLC8A3	-1.61374	0.0458927
				RP11-261C10.7	-1.51731	0.0460084
				HBB	-1.75378	0.046097
				RP11-108K14.8	-1.99272	0.0461045
				BLK	-1.59855	0.0462418
				AK3P5	-1.61969	0.0463508
				HBE1	-2.41413	0.0465148
				EXOSC3P1	-1.81516	0.0466792
				GOLGA6L10	-1.74026	0.0467091
				TNFAIP8L3	-1.90376	0.0467178
				EEF1A1P3	-1.50194	0.0469371
				RASSF9	-1.59379	0.0471063
				CD2	-1.96169	0.0472781
				HIST2H3D	-2.0405	0.047413
				DPH3P1	-2.05806	0.0478345
				FAM186A	-1.67913	0.0479595
				TMEM171	-1.57475	0.0480165
				AC114812.9	-1.65522	0.048068
				SERPINB10	-1.86963	0.0482935
				RORC	-1.97442	0.0483138
				CORT	-1.80137	0.0484618
				TUBB4BP2	-1.70139	0.0485267
				RP5-836E8.1	-1.70139	0.0485267
				FXYD6-FXYD2	-1.70139	0.0485267
				PP2D1	-1.84708	0.0486867
				C19orf18	-1.69943	0.04874
				XRCC6P1	-2.1435	0.0489828
				PSMC1P3	-1.64482	0.0494131
				SPANXB1	-1.64482	0.0494131
				RP11-558O12.1	-2.53656	0.049619
				PDE6A	-1.81439	0.0496908
				ST13P13	-1.54464	0.0498757

## Sheet: vs H1 hESC-iMEF
	gene_symbol	logFC	P.Value		gene_symbol	logFC	P.Value
	ITGB6	6.29426	7.65884e-09		GAPDHP65	-9.87676	1.60152e-07
	LHX5	6.85012	1.32421e-08		MTND5P10	-7.48566	1.71723e-07
	TGFBI	5.19709	9.81517e-08		PGAM1P2	-7.34331	1.98507e-07
	TRIM29	5.40532	1.55147e-07		RPS4XP6	-8.16215	2.72843e-07
	COL17A1	5.01762	1.55798e-07		RP11-347C18.1	-7.67681	2.99101e-07
	KRT17	5.97734	2.73954e-07		EEF1A1P27	-6.97633	3.01304e-07
	ZNF677	4.60066	3.63606e-07		GAPDHP63	-7.46006	3.29658e-07
	CDSN	7.57566	3.75181e-07		RP11-109P14.8	-7.85527	3.50946e-07
	SIX3	5.08462	4.01175e-07		EEF1A1P10	-7.36585	4.70568e-07
	KANK4	4.76197	4.27379e-07		RPSAP23	-7.30067	4.79758e-07
	GREB1L	5.69522	5.70708e-07		RP3-406A7.1	-7.95049	5.52238e-07
	TNNT3	6.89475	7.74058e-07		AGTR2	-6.62631	5.88842e-07
	CCDC80	2.3804	1.06178e-06		RP5-837J1.1	-8.01298	6.06333e-07
	IRX2	2.49084	1.23397e-06		RPL18P13	-7.33956	6.20516e-07
	DSC3	3.6268	1.69485e-06		RP4-803A2.1	-8.45541	7.33363e-07
	LY6D	5.96245	1.97401e-06		ATP5BP1	-7.08709	9.20774e-07
	KRT14	5.7418	2.20353e-06		ARSE	-3.19598	9.66673e-07
	C1orf21	2.20978	2.33108e-06		PGK1P2	-8.1348	1.02164e-06
	ZNF732	4.88722	2.56626e-06		MSNP1	-5.85624	1.10426e-06
	TGM2	3.82436	2.82725e-06		RP11-28P17.3	-8.04122	1.13151e-06
	HES3	3.65715	2.89242e-06		RP11-416L21.2	-7.14075	1.19187e-06
	PKDCC	2.95695	3.18345e-06		RPS23P7	-8.26982	1.2327e-06
	WNT6	6.66015	3.48358e-06		CTC-398G3.2	-6.84692	1.29101e-06
	KRT5	6.10134	3.84279e-06		RP11-204K16.1	-7.52177	1.29362e-06
	IGFBP3	3.29414	3.88139e-06		GAPDHP51	-7.08938	1.44902e-06
	CRB2	2.64186	4.55148e-06		RPLP1P11	-8.25823	1.46488e-06
	ZNF662	4.21525	4.73015e-06		RP11-543B16.2	-7.38143	1.46974e-06
	MUC16	5.16485	5.176e-06		RP11-543E8.2	-7.56218	1.49637e-06
	MSLN	5.31088	5.30194e-06		RPSAP28	-7.94603	1.51191e-06
	VTCN1	5.05625	5.59001e-06		CTD-2061E19.1	-7.15781	1.52732e-06
	C8orf4	4.77647	5.91716e-06		MAGEB17	-5.46283	1.66377e-06
	OLIG3	4.45017	6.37503e-06		GAPDHP44	-8.74695	1.67604e-06
	ANXA8	3.5397	7.08101e-06		RP11-343B5.1	-7.1397	1.77907e-06
	IGF2	5.1326	8.54543e-06		AF131215.1	-7.26843	1.89813e-06
	SPRR3	6.13819	9.49691e-06		PPIAP22	-7.25203	1.94586e-06
	CERCAM	2.74937	1.0541e-05		RPSAP31	-7.39478	2.01231e-06
	TIMP3	3.50558	1.14638e-05		RP11-92C4.4	-8.08971	2.01259e-06
	KRTAP13-4	4.32045	1.18672e-05		POTEKP	-8.08301	2.14248e-06
	ZBED2	4.50518	1.41131e-05		RP11-307I14.2	-7.67926	2.15194e-06
	DSG3	4.26966	1.45134e-05		RP3-486I3.4	-8.27281	2.1801e-06
	RP11-807H22.6	4.41197	1.45579e-05		RP11-305L7.5	-8.20117	2.29392e-06
	GLI3	1.94688	1.61081e-05		PEBP1P2	-7.32324	2.34617e-06
	PTHLH	5.08725	1.62104e-05		RPS15AP25	-7.37032	2.38474e-06
	COL3A1	3.79526	1.71912e-05		PKMP2	-7.32499	2.52936e-06
	PLSCR5	5.2955	1.94245e-05		FTH1P5	-9.57747	2.62876e-06
	FEZF2	5.50145	2.01551e-05		RPS4XP21	-7.75092	2.63071e-06
	CPXM2	2.09678	2.03111e-05		CAP1P2	-6.77834	2.6705e-06
	SOX1	4.69663	2.5064e-05		NPM1P8	-7.07581	2.67752e-06
	ZNF253	3.96265	2.6175e-05		LDHAP7	-6.9005	2.72489e-06
	LAMB3	4.07585	2.6212e-05		RP11-388B24.4	-7.6876	2.73815e-06
	LIX1	5.21269	2.7367e-05		RP1-146I3.1	-7.05041	2.96455e-06
	SOX21	3.9486	2.84212e-05		HSP90B2P	-5.84099	2.99161e-06
	EDN1	2.94354	2.87937e-05		ATP5G2P1	-7.2817	3.15616e-06
	KRT7	3.17989	2.90981e-05		RP11-759L5.2	-8.17118	3.26415e-06
	CRISPLD2	3.20891	3.21041e-05		RP11-215P8.1	-7.83614	3.26854e-06
	RAX	3.81747	3.3394e-05		AC108039.1	-7.23998	3.31932e-06
	DLK1	4.4565	3.58725e-05		EEF1B2P2	-7.80418	3.35156e-06
	LRP2	2.86303	3.60033e-05		RPL7P5	-7.86277	3.58273e-06
	KRT6A	7.83484	3.76141e-05		RP11-672L10.5	-7.25474	3.60564e-06
	SALL1	1.77683	3.79464e-05		EIF4A1P6	-6.84618	3.76735e-06
	PYGM	2.28361	3.98968e-05		RP11-567G24.1	-6.38855	3.89713e-06
	SLC30A1	1.73497	4.01871e-05		HINT1P2	-7.5276	4.01524e-06
	PLEKHB1	1.96016	4.15105e-05		IFIT2	-2.58719	4.02257e-06
	IL22RA1	3.31597	4.17947e-05		EEF1A1P12	-5.11719	4.10434e-06
	CST6	3.39758	4.63249e-05		TESPA1	-3.10034	4.19344e-06
	FEZF1	4.83281	4.7197e-05		RPS17P2	-6.98735	4.23579e-06
	RP13-582O9.6	4.37776	4.7587e-05		OLR1	-5.96623	4.34484e-06
	MN1	2.17419	4.86198e-05		BTF3P7	-7.02224	4.37049e-06
	EPGN	5.48461	5.00512e-05		TBCAP1	-6.91147	4.57309e-06
	ODAM	4.17818	5.23828e-05		RPL17P20	-7.87408	4.63594e-06
	LAMA3	4.18505	5.73699e-05		RP11-267D19.2	-6.89834	4.68588e-06
	EPAS1	2.86458	5.83203e-05		PTMAP2	-5.3555	5.24185e-06
	GDPD2	1.9052	5.94941e-05		AC099535.4	-6.35713	5.24622e-06
	COL9A1	1.91542	6.57416e-05		SERPINH1P1	-6.38386	5.86068e-06
	TNF	3.66448	6.81703e-05		HOXC10	-5.95568	5.97246e-06
	LRRC17	2.82289	7.15339e-05		RP11-313E4.1	-7.09687	5.98951e-06
	DLL1	2.59314	8.48843e-05		MMP3	-8.83522	6.11613e-06
	SOX9	2.09785	8.89546e-05		LA16c-3G11.7	-5.84095	6.12693e-06
	BMP7	1.67817	9.0343e-05		AC006445.6	-6.89827	6.38623e-06
	PSG5	3.49647	9.38628e-05		AC110615.1	-6.88804	6.70247e-06
	TLE4	1.67994	9.85016e-05		EIF2S2P4	-5.81595	6.89865e-06
	SNAI2	3.14139	9.90667e-05		AC009502.1	-4.83872	7.3323e-06
	TNFAIP3	1.93952	0.000108869		ALDOAP2	-5.80504	7.33332e-06
	PAPLN	2.41921	0.000118795		NACA3P	-6.19514	7.40145e-06
	LAMC2	2.04718	0.000120174		UBBP1	-7.09228	7.51693e-06
	CTSF	2.66003	0.000125825		SHC1P2	-4.86467	7.65803e-06
	RSC1A1	4.45251	0.000131377		PKMP1	-7.41226	7.82649e-06
	C6orf141	2.62336	0.000131612		HSP90AB6P	-5.86125	8.02668e-06
	UPK1B	3.50632	0.000134241		VDAC1P10	-5.20304	8.09508e-06
	TEF	2.11671	0.000141147		NPM1P43	-6.49395	8.60662e-06
	LEF1	3.02165	0.000141796		PAICSP2	-5.08769	8.78842e-06
	OTX1	3.61386	0.000142391		INHBB	-5.47128	9.15176e-06
	SEMA5B	1.62269	0.000143448		COX5BP1	-7.06111	9.20828e-06
	NPFF	4.24717	0.00014352		RP11-214N15.5	-6.27136	9.277e-06
	ZNF521	2.55255	0.000144622		EEF1A1P5	-2.99659	9.80742e-06
	ATP1A2	2.42504	0.000154323		RP11-108K14.8	-4.57712	9.84232e-06
	TMEM132C	4.60714	0.000154735		PRKAR1AP1	-5.42548	9.86162e-06
	KCNMA1	1.97484	0.000160285		RPL4P4	-5.23796	1.00644e-05
	XAGE2	4.11225	0.000166004		CTD-2313D3.1	-5.43342	1.02182e-05
	PPP1R1B	1.98995	0.000178004		AC016739.2	-6.12674	1.02569e-05
	PDZK1P1	4.06881	0.000186596		AC113404.1	-6.92149	1.03065e-05
	MAP2	3.53101	0.000203447		AC104076.2	-6.25406	1.03598e-05
	CHI3L2	4.05631	0.000207006		RPL10L	-8.04777	1.04618e-05
	LRRTM1	2.37893	0.000209593		ASS1P6	-6.97263	1.05321e-05
	CH507-42P11.8	1.96473	0.000210476		PCDH10	-2.39425	1.08806e-05
	TGM1	2.86824	0.000212559		RP11-829H16.2	-6.6732	1.10111e-05
	PKNOX2	2.02647	0.000225776		RPL5P29	-6.49492	1.13187e-05
	ACKR2	2.96917	0.000226826		RPLP0P6	-5.03802	1.14015e-05
	TGFB2	2.94987	0.00022942		NDUFB9P2	-6.6942	1.17841e-05
	GGTLC2	2.93394	0.000232498		PRMT1P1	-6.0939	1.18063e-05
	TTYH1	1.93926	0.000242435		RP11-389O22.4	-6.60703	1.18611e-05
	FIGNL2	2.31565	0.000244359		RP11-296A18.5	-7.99069	1.19648e-05
	VGLL1	4.75337	0.000245714		PDIA3P1	-5.66751	1.20798e-05
	SEZ6	3.14865	0.000247522		RPSAP53	-6.33538	1.22636e-05
	PRTG	3.59597	0.000257485		RP11-481K9.4	-6.83357	1.22684e-05
	FRG1CP	3.02676	0.000263157		SLC40A1	-3.7886	1.22695e-05
	C19orf33	2.4824	0.000271479		RP6-218J18.2	-4.99749	1.24792e-05
	ZIC5	1.74259	0.000273822		PKMP4	-6.31993	1.27358e-05
	SLC16A9	1.70324	0.000279468		HOXC6	-5.42379	1.27565e-05
	ZNF880	2.43469	0.000283015		HMGA1P6	-6.24511	1.29548e-05
	RP11-478C6.6	3.1225	0.000290623		RP11-334L9.1	-6.51939	1.31102e-05
	CLIP3	1.66639	0.00029101		RAD23BP2	-5.09068	1.35126e-05
	MEDAG	2.00424	0.000302502		HSPA8P14	-5.9368	1.35799e-05
	WNT5A	2.26467	0.000305376		VDAC1P2	-5.9898	1.36515e-05
	FBLN7	3.36824	0.000323465		TOMM20P2	-5.582	1.37019e-05
	FHOD3	1.95567	0.000329464		TUBB4BP7	-6.82494	1.41284e-05
	MOXD1	2.03292	0.000341711		RP11-356M20.1	-5.35176	1.4674e-05
	ILDR2	2.51875	0.000343		SDHDP2	-5.18578	1.46841e-05
	CDO1	1.51339	0.000343725		MIXL1	-3.55289	1.47137e-05
	HES5	3.4314	0.000343949		ATP5F1P7	-5.65855	1.47176e-05
	RP11-640N20.6	2.51448	0.000348729		TUBBP8	-5.29163	1.49356e-05
	KRTAP2-3	5.05884	0.000352157		CTC-260E6.2	-5.80863	1.49372e-05
	PAMR1	2.51246	0.000357326		RP4-570O12.2	-6.8695	1.55611e-05
	OSR1	3.2572	0.000374808		RP11-364L4.1	-5.4709	1.56056e-05
	PCDH8	3.69661	0.000374966		AC092569.2	-6.95549	1.60583e-05
	PLAGL1	2.37078	0.000417509		ACTG1P21	-5.49473	1.62365e-05
	TRPM3	1.84966	0.000486301		GNAI2P1	-6.1389	1.63887e-05
	TRIM55	3.35178	0.000508328		DPP3P1	-5.55562	1.6849e-05
	KISS1	3.96922	0.000519507		RPL21P6	-6.4477	1.69015e-05
	GNA15	2.91869	0.000540588		C1QBPP2	-6.35261	1.69394e-05
	RP11-446E24.4	3.05289	0.000547641		FOXA2	-4.50699	1.71457e-05
	ASTN1	1.96321	0.000555452		RPL24P4	-7.14543	1.7413e-05
	MAPK4	1.77563	0.000559448		CSNK1A1L	-4.5517	1.82152e-05
	CTGF	1.705	0.000560519		LEFTY2	-4.63491	1.83783e-05
	LA16c-380H5.3	2.93752	0.000561272		RPL4P3	-6.9478	1.84499e-05
	RP11-420K14.1	2.80707	0.000592324		SAR1P1	-5.38222	1.84902e-05
	JAG1	1.64557	0.000595698		UBBP4	-4.70075	1.86952e-05
	DAPP1	3.50425	0.000596158		RPL29P24	-6.50933	1.87274e-05
	POU3F1	1.83981	0.000623298		RPL7P11	-6.18083	1.92712e-05
	KRT16	4.20921	0.00062794		HSP90AA6P	-6.01298	1.97921e-05
	C11orf87	3.04956	0.000632224		RP11-290H9.2	-4.60993	2.06346e-05
	C5orf46	3.43647	0.000639057		CTB-85P21.1	-6.69595	2.12445e-05
	TEK	1.8951	0.000644753		KB-1205A7.1	-6.86122	2.12446e-05
	GNRHR2P1	3.60405	0.000645714		RP11-275F13.3	-5.63687	2.12605e-05
	IL36RN	3.31351	0.000665021		PABPC1P10	-4.37893	2.15633e-05
	PRRT2	1.93164	0.000690115		CCT4P1	-4.55272	2.17316e-05
	NPTX1	3.37427	0.000701689		AC114755.4	-6.91888	2.20486e-05
	HMX3	3.50529	0.000702698		CLIC1P1	-6.69635	2.23237e-05
	COX6B2	1.96657	0.000709611		SHC1P1	-5.27803	2.31437e-05
	STOML3	3.62561	0.000723487		POTEJ	-6.55481	2.31954e-05
	ZIC1	3.24573	0.000730585		EIF4A1P10	-5.38234	2.45292e-05
	RP11-136C24.3	2.62496	0.000745192		MPP1	-2.40269	2.45502e-05
	NNAT	2.4174	0.000766724		AC016712.2	-5.95047	2.48102e-05
	CUZD1	3.72626	0.000767181		RPS4XP17	-7.24952	2.54479e-05
	CDH20	2.9928	0.000784358		AC017079.3	-6.59025	2.55322e-05
	LMO1	3.52573	0.000811782		SDC4P	-4.46715	2.56031e-05
	MAP1LC3C	1.96453	0.000855022		RP11-39C10.1	-6.23478	2.63859e-05
	TNXB	2.53687	0.000909034		AC068137.13	-6.2221	2.65627e-05
	TNFRSF19	2.88538	0.000912369		RP1-319M7.2	-4.32791	2.66584e-05
	KCNA1	2.91513	0.000919693		PSMD8P1	-5.96221	2.70365e-05
	C1orf87	2.99208	0.000920024		HOXA9	-4.1267	2.7197e-05
	GPR162	2.43527	0.000970955		RP11-286H14.4	-5.41879	2.7948e-05
	PKP1	2.82731	0.000994205		HSP90AB3P	-4.62363	2.81564e-05
	FXYD6	1.60077	0.000994489		GLIPR1L1	-5.03118	2.88524e-05
	TH	2.61621	0.00100893		HSPA9P1	-5.92453	3.08203e-05
	CLDN9	2.31321	0.00101534		RPS8P3	-6.35044	3.09864e-05
	FAM107A	2.71462	0.00102301		RPS3AP22	-6.22374	3.17434e-05
	THBS3	1.60774	0.00102999		CTA-714B7.4	-5.58171	3.2376e-05
	WNT10A	3.03618	0.00105339		RP11-451J24.1	-6.72703	3.26191e-05
	CTB-60B18.15	2.48491	0.00105777		RPS15AP9	-6.92169	3.29747e-05
	SCN4B	1.8258	0.00106483		RP1-101G11.2	-4.42551	3.29982e-05
	SLITRK6	2.45682	0.00106538		RP11-166J22.1	-6.46821	3.30126e-05
	ATP6V1G2-DDX39B	5.26566	0.00108124		RP11-467N20.7	-6.31836	3.36262e-05
	DASS-161H22.6	5.26566	0.00108124		RPS19P1	-6.24002	3.36637e-05
	MFNG	1.93577	0.00108126		FTH1P2	-5.70837	3.36648e-05
	HSPB7	3.37004	0.00108909		SLC5A9	-4.80063	3.46379e-05
	NID2	1.8785	0.00109311		BTF3P9	-5.69254	3.51166e-05
	COL1A2	1.80673	0.00112289		RP11-293I14.2	-4.0827	3.62669e-05
	AC006116.27	3.69872	0.00113609		RANP3	-5.86201	3.64686e-05
	NOC2LP1	3.0485	0.00114127		RP1-182O16.1	-6.20437	3.73249e-05
	FEZ1	1.72425	0.00117746		CPO	-4.61973	3.77079e-05
	SFRP1	1.83722	0.00117964		RPL3P2	-3.84866	3.85196e-05
	POU3F2	2.77031	0.00119661		RP11-538P18.1	-5.85697	3.85629e-05
	HPSE2	2.29273	0.00120673		RP11-804H8.5	-4.88203	3.88851e-05
	KCNG3	2.08271	0.00121791		RP11-168J18.6	-5.55721	4.00519e-05
	GLIS3	2.64459	0.00126236		GPX1P1	-5.51618	4.00732e-05
	CRABP2	1.77317	0.00127201		AC079305.5	-5.45942	4.08989e-05
	MFAP5	1.71462	0.00127532		HNRNPA3P15	-4.75202	4.22375e-05
	PAPPA	2.55722	0.00127747		SLC25A5P8	-5.2829	4.23132e-05
	MAFB	1.65061	0.00128344		ANP32AP1	-5.27047	4.3468e-05
	LRRC4	1.57552	0.00130222		MYL6P2	-6.04435	4.41978e-05
	PPY2P	2.32359	0.0013067		C1orf61	-2.9804	4.4298e-05
	RP11-252P18.1	2.32359	0.0013067		PRR13P4	-6.02084	4.47023e-05
	GAS1	1.99034	0.00131748		TECRP2	-6.20194	4.51495e-05
	ZNF354C	3.11291	0.0013271		DYNLL1P3	-5.51454	4.6535e-05
	LRRC4B	2.14076	0.00136208		EEF1A1P29	-5.99788	4.70654e-05
	ZNF883	2.4751	0.00136275		RP11-147K6.2	-6.36593	4.71143e-05
	AC104532.2	3.70925	0.00139053		DPT	-5.41665	4.80402e-05
	CLIC3	3.18115	0.00141718		RCC2P4	-3.8024	4.81679e-05
	ID2	2.06346	0.00141953		CCT5P1	-5.7024	4.86275e-05
	ECEL1P1	2.4405	0.00144775		TMEM200B	-2.09875	5.07225e-05
	PROM2	2.39712	0.0014709		PTP4A1P2	-5.39057	5.12734e-05
	ERP27	3.18257	0.00149908		RPL17P51	-5.55244	5.20865e-05
	GRHL3	2.92685	0.00149976		EEF1A1P15	-6.0073	5.24906e-05
	BNIPL	2.69371	0.00160068		AC111200.7	-5.66055	5.44814e-05
	RHBDL3	1.95401	0.00160842		FKBP9P1	-4.44306	5.47481e-05
	GYS2	2.21991	0.00161121		RPSAP11	-6.78849	5.54537e-05
	AC090286.2	2.21991	0.00161121		RP6-29D12.3	-6.67881	5.68438e-05
	EDN3	2.42982	0.00161761		AC104651.2	-5.96608	5.74073e-05
	CYP26C1	2.8958	0.00164328		EEF1A1P24	-5.4225	5.75536e-05
	SIX6	3.70902	0.00167031		SNRPGP8	-6.03626	5.82084e-05
	PPP1R14C	2.16918	0.00168373		RP11-329A14.2	-6.13744	5.82091e-05
	ART4	2.80301	0.00168939		RP11-52I18.1	-5.59923	5.8416e-05
	TACSTD2	2.98185	0.00169425		RPL36AP6	-6.54573	5.84241e-05
	SSC5D	1.68983	0.00172857		RP11-524L6.2	-5.06186	5.8528e-05
	NECTIN4	1.94245	0.00173484		RAB1C	-5.23875	5.9309e-05
	CMTM5	3.77952	0.00173688		MMP10	-6.42391	5.96383e-05
	SPON2	1.83006	0.00174833		AC010132.11	-5.41251	5.97087e-05
	POU3F4	3.28944	0.00175075		RP11-369G6.2	-5.88167	6.03271e-05
	BOC	2.33127	0.0017828		RP11-32B5.1	-3.77333	6.03646e-05
	NUAK2	1.62311	0.00180589		RP3-426I6.2	-5.87925	6.12537e-05
	LUZP2	2.37781	0.00183046		PSAT1P2	-3.79821	6.17106e-05
	FSBP	1.7459	0.00183606		AC005795.1	-5.09462	6.26472e-05
	DBX1	2.35995	0.00185635		TMED10P1	-5.7167	6.29326e-05
	SESN3	2.00516	0.0018643		USH2A	-3.59503	6.5419e-05
	KRT23	4.83618	0.00186499		RP5-934G17.6	-3.598	6.56752e-05
	ENDOU	3.48783	0.00187774		CCT5P2	-5.69594	6.77174e-05
	KCNIP1	3.16364	0.00192087		ACTN4P1	-4.93449	6.80104e-05
	DLX2	2.72641	0.00193003		RP11-697N18.1	-5.18903	6.93958e-05
	BIK	2.25565	0.00193367		MT1A	-3.61529	7.23348e-05
	STXBP6	1.57583	0.00194934		RP11-64K7.1	-5.55556	7.3235e-05
	HTRA3	2.0203	0.00195569		PKIB	-2.36065	7.44949e-05
	ARHGAP19-SLIT1	2.95159	0.00196054		BEX5	-2.25067	7.51836e-05
	SMOC1	3.04216	0.00200917		RBBP4P2	-5.29119	7.58714e-05
	MYLPF	2.1927	0.00201439		CYP4F23P	-4.00873	7.64808e-05
	CTNNA2	2.13092	0.00208463		HOXC8	-4.84661	7.65929e-05
	RP11-468E2.2	3.43241	0.00211658		CCDC129	-4.42779	7.67328e-05
	CAMK1G	2.9898	0.00213139		SPDEF	-2.91242	7.69562e-05
	FN1	2.38426	0.00214238		EEF1GP3	-4.76413	7.89236e-05
	SYT11	2.17807	0.00215417		RP11-54I5.1	-3.93151	7.94978e-05
	CAPS	1.68572	0.00217638		HNRNPA1P43	-4.44937	7.96019e-05
	KCNN4	2.18559	0.00218116		LINC01057	-3.35265	7.99187e-05
	NAALADL2	2.19385	0.00219968		LGMNP1	-5.37446	8.08157e-05
	LLNLR-285B5.1	3.21754	0.00224095		SPOCK3	-3.80334	8.10483e-05
	DAZL	2.502	0.00225979		RPL30P14	-5.50274	8.13701e-05
	FAM181A	3.54968	0.00226632		GATA4	-5.43688	8.14632e-05
	EGR2	2.04616	0.00228302		AIMP1P1	-4.9531	8.2088e-05
	STK32A	2.03424	0.0022901		COX6CP10	-5.86261	8.25707e-05
	AL772307.1	2.0732	0.00231663		LA16c-60G3.7	-3.48717	8.31522e-05
	KRT9	2.0732	0.00231663		PSMA6P1	-5.99661	8.41249e-05
	OR7E125P	2.0732	0.00231663		CTD-2538A21.1	-5.63813	8.59333e-05
	GLUD1P8	2.0732	0.00231663		CTD-2122P11.1	-4.99454	8.59423e-05
	RTL1	3.62629	0.00239986		C1DP2	-4.5006	8.63672e-05
	RSPO2	2.51866	0.00240871		HOXB9	-4.7566	8.67774e-05
	ISLR2	2.60709	0.00244003		RP11-77P16.1	-5.75577	8.68013e-05
	GALNT5	2.07581	0.00244109		ZFP42	-4.48691	8.68122e-05
	SPATA31A7	2.7395	0.00244275		CTC-512J14.7	-5.56752	8.75225e-05
	C5orf38	2.01657	0.00244612		SEPT7P7	-4.17339	8.91234e-05
	FAM196B	2.9623	0.00254104		PHBP21	-4.93526	9.06865e-05
	SHANK1	2.02562	0.00257325		PROS2P	-4.32247	9.2149e-05
	LMOD1	1.90188	0.00262124		HOXA5	-4.53815	9.32741e-05
	AL365181.1	2.56341	0.00264317		COX6CP16	-5.50287	9.35475e-05
	ZIC4	2.40396	0.00269352		HNRNPA3P2	-5.46499	9.40623e-05
	RHCG	3.01494	0.00270636		AC091654.7	-5.47543	9.46833e-05
	TJP3	1.68681	0.00275664		RP11-57K17.1	-3.85958	9.61899e-05
	LYNX1	1.59437	0.00277157		NPM1P30	-4.70914	9.91589e-05
	RAB7B	2.92632	0.00282934		RPL10P1	-5.28324	0.000101619
	ACBD7	1.89135	0.00284352		CTC-448F2.6	-4.08694	0.000107342
	TINCR	2.04405	0.00285296		AL161905.1	-5.69623	0.000107346
	WFIKKN1	1.61861	0.0028791		RP11-172C16.4	-3.82534	0.000108167
	PER3	2.45742	0.00289501		RP11-615I2.3	-4.07231	0.000109982
	BAHCC1	2.30802	0.00289506		BEX1	-1.6268	0.000114261
	TNFRSF6B	5.13529	0.00290095		SLC25A5P5	-5.13908	0.000116608
	COL5A1	2.02739	0.00292182		NUS1P1	-4.105	0.000116668
	SDK2	2.18485	0.0029587		LRRN2	-2.09748	0.00011757
	SOX15	1.66195	0.00297223		ALG1L7P	-3.8766	0.000117665
	PAX6	3.35605	0.0029846		ALDOAP1	-5.93545	0.000119135
	SLC44A2	1.63063	0.00298536		SMPX	-3.7416	0.000120073
	UCMA	2.35184	0.00301823		SNRPCP8	-5.04364	0.000120956
	RP11-478C6.5	2.51884	0.00302131		RP11-161H23.10	-3.93776	0.000123678
	SLC6A16	1.99852	0.00307733		IL13RA1	-1.86242	0.000123977
	NTF3	2.66333	0.00310845		RNASE1	-3.90431	0.000124084
	MYOZ1	1.78755	0.00311536		FGF17	-4.40196	0.000124949
	SCGN	3.26033	0.00313816		RP11-440K22.1	-5.45664	0.000126865
	SERPINB5	3.1084	0.0031851		GSC	-4.50508	0.000128666
	BARHL1	4.89196	0.00322368		TWIST2	-3.56702	0.000130318
	OPCML	1.93486	0.00322431		CTD-2620I22.2	-4.71663	0.000130961
	WSCD2	2.94754	0.00323382		C17orf51	-1.83406	0.000132455
	CNTN3	2.76871	0.00324347		XXcos-LUCA11.5	-3.36772	0.000134195
	KCNC3	1.99194	0.00329138		EEF1A1P7	-3.78408	0.00013612
	SCUBE3	2.01424	0.00333901		WNT3	-2.33113	0.000136454
	CDH9	3.14527	0.0033485		AHCYP7	-4.0019	0.000137058
	ANKK1	3.14206	0.00337293		HOXD10	-4.44112	0.000137351
	CADM2	1.54171	0.00337824		ELL2P1	-4.297	0.000137989
	KIF17	1.6399	0.00346146		SNX6P1	-3.94432	0.000138024
	SORCS2	1.96529	0.00348673		HOXA13	-3.70654	0.000138067
	SSFA2	1.54836	0.00349628		WISP2	-3.82802	0.000141005
	GREM1	2.38069	0.00351472		TNPO1P3	-3.29735	0.000141018
	HMCN2	1.85718	0.00351919		ANP32BP3	-5.66816	0.000141106
	SLC16A8	2.04176	0.00352913		RPL7P14	-3.66748	0.000141903
	HS3ST5	1.62085	0.0035999		AHCYP5	-4.20263	0.000143819
	EPHA4	1.64641	0.00361149		GTF2IP9	-3.60696	0.000144782
	NEUROG3	2.14756	0.00364535		AC125238.2	-3.35917	0.000148682
	KLHL14	1.71182	0.00371628		TIMP4	-2.27008	0.000148887
	RASA4B	1.80647	0.00372996		HOXC9	-4.56279	0.000148957
	SRCIN1	1.80297	0.00374284		FAM50A	-1.50405	0.000150056
	DNAH8	2.22133	0.00382419		RPL34P33	-5.10236	0.000150972
	CNTNAP1	1.53584	0.00382819		PA2G4P2	-5.3859	0.000151318
	SCUBE1	1.73028	0.00385904		RP11-553L6.3	-4.09077	0.00015186
	RP11-162P23.2	3.63601	0.00390025		HNRNPCP10	-4.61023	0.000152991
	SLC17A7	1.78986	0.00393678		GAPDHP37	-3.51959	0.000153764
	C10orf11	1.61653	0.00393925		YWHAQP7	-4.67422	0.000154146
	TMEM169	1.6917	0.00395927		RP11-164H5.1	-5.10796	0.000156833
	HILS1	2.26593	0.00397247		NACAP1	-5.14366	0.000157103
	NEUROG2	2.26593	0.00397247		RP11-549B18.3	-3.86238	0.000158633
	RP11-463D19.2	3.36141	0.00406324		HOXC5	-3.44213	0.000159334
	SVOPL	1.77226	0.00409512		HSP90AA4P	-4.08318	0.000161041
	SLC6A7	2.10168	0.00409683		RP13-75G22.1	-3.77777	0.000162877
	FAM60CP	2.10168	0.00409683		SLC38A5	-1.72082	0.00016558
	RP11-674E16.1	2.10168	0.00409683		AC083862.6	-3.55202	0.000167316
	VIPR2	2.61029	0.00414081		RFWD2P1	-3.46281	0.000169392
	BAALC	1.7634	0.00427034		WDR82P2	-3.39012	0.000170283
	RP11-295K3.1	2.10941	0.00427627		RP11-446E9.1	-5.23373	0.000171097
	ADGRG1	1.88706	0.00427671		MTHFD1P1	-3.31951	0.000171219
	MYLK	1.63814	0.00430169		RGPD2	-4.59235	0.000171757
	BCO1	2.21591	0.0043063		SEC63P1	-5.38426	0.000172722
	MYF6	2.17708	0.00431787		HSPD1P2	-4.40786	0.000172763
	GJB3	2.26554	0.00433504		INTS4P2	-4.00436	0.000172848
	WNT11	2.24925	0.00436113		PCED1B	-2.01599	0.000173165
	FGF3	3.48614	0.00437563		HRG	-3.3025	0.000173255
	RRAD	2.86145	0.0044567		LRRTM2	-3.17184	0.000174409
	ATP6V0A4	1.9411	0.00450472		NRN1	-2.75577	0.000180041
	SMOC2	2.89826	0.00454622		MORC4	-1.9248	0.000180311
	IGFN1	2.48621	0.00455162		PHBP10	-4.43876	0.00018086
	MMRN1	4.96265	0.00466035		RP1-34B20.4	-3.53142	0.000185447
	MEIOB	4.15833	0.00466321		EIF2S2P3	-4.16155	0.000186585
	SPATA31C1	1.99602	0.00469386		EEF1A1P17	-4.23979	0.00018986
	HTR1D	1.72265	0.00470606		ACTBL2	-4.40244	0.000190972
	IGFBPL1	1.72059	0.00492774		AC004920.2	-4.16219	0.000191466
	BANF1P2	2.89353	0.00496505		ATP6V1E1P1	-4.67027	0.000192451
	APOC2	2.42958	0.00496994		TUBB8P9	-5.09455	0.000192891
	ANXA8L1	2.06334	0.00498752		AC010240.2	-3.28115	0.000193572
	FAP	2.38827	0.00502738		CFL1P4	-5.26739	0.000194503
	LHX2	2.11318	0.00503206		RP4-580O19.2	-5.26618	0.000194735
	CLEC10A	4.01892	0.00507577		SOX17	-4.87551	0.000195405
	PLA2G2F	2.11688	0.00512893		RP11-438L7.3	-4.64493	0.00019703
	RPL8P2	2.11688	0.00512893		ASB5	-3.28684	0.000198296
	RP11-360D2.2	2.11688	0.00512893		DNAJA1P3	-4.70878	0.000201332
	IL1R1	1.60572	0.00520818		PA2G4P1	-4.65899	0.000201598
	PSCA	2.40656	0.00523413		PIN4P1	-5.56756	0.000206316
	SLC30A2	2.00373	0.00528039		RP11-512F24.1	-4.76721	0.000207131
	SLITRK3	2.07647	0.00528301		ARL6IP1P1	-3.46936	0.000207608
	CDH23	2.16253	0.00531173		ACTG1P2	-3.84785	0.00020802
	CTD-2105E13.6	2.27101	0.00538009		ACTG1P11	-3.84785	0.00020802
	PDGFRB	1.56868	0.00543848		EIF3EP1	-3.69439	0.000214451
	MLLT10P1	2.24644	0.00544564		IMMTP1	-4.32657	0.000214528
	SKIDA1	1.95261	0.00548951		EOMES	-3.79362	0.000215691
	KIRREL3	1.77198	0.00559285		RANP4	-5.28303	0.000217042
	MEGF11	1.58911	0.00560414		BRDT	-3.52562	0.000217546
	CRYL1	1.67329	0.00567552		HOXA11	-3.8814	0.000219291
	GPC3	1.57904	0.00584269		SLC38A11	-4.5226	0.000219421
	MEOX1	4.0341	0.00586531		GRIA3	-2.1095	0.00022317
	NR1I2	2.50849	0.00589165		GJA6P	-3.17981	0.000223783
	PRMT8	1.85146	0.00591426		CTD-2311M21.2	-2.36049	0.000224548
	ASTL	2.78384	0.006024		FOXQ1	-5.07947	0.000224679
	C11orf96	1.63564	0.00612354		NCLP2	-5.44178	0.00022548
	DHDH	1.60702	0.00612944		ATP5A1P7	-6.29847	0.000227523
	SLC5A8	1.85132	0.00612989		TREML2	-3.79969	0.000228409
	NPM1P38	1.85132	0.00612989		CH507-9B2.2	-4.11134	0.000231751
	MKRNP2	1.85132	0.00612989		ACTG1P17	-3.94549	0.000233225
	RPL21P67	1.85132	0.00612989		RPS7P6	-4.66646	0.000233236
	RP11-480G7.2	1.85132	0.00612989		TPTEP1	-1.90245	0.000234766
	CDK4PS	1.85132	0.00612989		ACTBP11	-4.41429	0.000234792
	UNC93B2	1.85132	0.00612989		RP11-44N17.1	-3.79595	0.000236929
	ARHGAP42P4	1.85132	0.00612989		SLC9A2	-3.044	0.000236969
	AC112198.1	1.85132	0.00612989		EEF1DP3	-5.53434	0.000240125
	ZNF585B	1.98522	0.00612991		UBE2NL	-4.89393	0.00024693
	FMO4	1.51539	0.00613261		TUBB8P6	-4.4592	0.000250845
	LAYN	1.53207	0.00616471		MT1F	-2.22906	0.000253664
	ABLIM3	2.12341	0.00630517		VDAC2P2	-4.52383	0.000255595
	FAXDC2	1.63309	0.00633979		PSAT1P1	-3.35932	0.000257786
	SLC5A7	2.19607	0.00637845		RP4-655L22.4	-4.64735	0.000258319
	GSX1	2.80103	0.0064071		ANP32BP1	-5.53499	0.000268074
	SYT7	1.51791	0.00646338		FOXA1	-3.43605	0.00027278
	TSPAN11	1.93188	0.00646524		CASP12	-3.18699	0.000278006
	PAX8	2.99179	0.00647809		AP000593.5	-3.89049	0.000278968
	CSPG4	1.55462	0.00650592		HPGDS	-3.07439	0.00027908
	TCEA1P4	2.26168	0.00652836		RP11-30M20.1	-3.07439	0.00027908
	ARID3C	3.17037	0.00655307		CD180	-4.0214	0.000280899
	CTCFL	1.64042	0.00659038		CLN8	-2.24141	0.000282695
	FAIM2	2.35187	0.00662765		NPM2	-3.1166	0.000289812
	CCL25	2.67591	0.00670292		RP11-488L18.3	-3.03539	0.000290281
	ELAVL4	1.97215	0.00677479		S1PR5	-2.08215	0.000291982
	FAM19A2	1.75826	0.00680865		TFF1	-4.45956	0.000292136
	APOBEC2	2.0731	0.00686434		PABPC3	-3.33505	0.000292975
	RP11-438J1.1	4.77415	0.00688274		API5P2	-2.99958	0.000293394
	SMTNL2	1.67053	0.00700265		CSPG4P13	-2.99958	0.000293394
	RBBP8NL	2.63117	0.00702929		RP4-775C13.1	-4.09369	0.00029653
	NGEF	1.57647	0.00704967		NPM1P49	-4.28029	0.000302081
	SERPINA2	2.60799	0.00715827		LDLRAD4	-3.5941	0.000313287
	DAPL1	2.96555	0.00718961		RP3-352A20.1	-3.32812	0.000314842
	RPL7P42	2.14869	0.00719927		RPRM	-1.78039	0.000316634
	CITED2	1.83975	0.00726378		NPM1P52	-4.34314	0.000317768
	CH17-296N19.1	3.56275	0.00728904		OLA1P1	-3.56067	0.000319578
	RP11-287D1.3	2.56341	0.007358		ACADL	-3.59535	0.000320765
	DPF3	2.00977	0.00755125		KCNG1	-1.64587	0.000328626
	SGMS2	1.76458	0.00755355		RAPSN	-2.98419	0.00032963
	COX4I1P2	2.19976	0.00764528		MT1M	-3.1427	0.000333386
	MYO16	2.33829	0.00775344		RPL7AP6	-3.09014	0.000335208
	TBX18	1.78209	0.00784762		EDNRB	-1.93782	0.000336084
	IRX1	2.65551	0.00788056		CYCSP42	-4.15221	0.000340657
	SLAMF8	3.5699	0.00788078		RP11-1029M24.4	-4.14941	0.000341134
	NECAB2	1.82874	0.00821174		AC010970.2	-1.83364	0.000342692
	BEAN1	1.90347	0.00822715		MTND1P23	-1.81014	0.000349335
	DKKL1	1.68109	0.00825693		DSEL	-1.83219	0.000351029
	FAM228A	2.55889	0.00831024		KIAA1161	-1.82204	0.0003511
	TCP10L	2.05102	0.0083193		RP11-69L16.5	-3.04063	0.000353048
	CYP1B1	1.66566	0.00836169		ATP5A1P10	-3.70159	0.000353617
	SYCE2	1.60069	0.00836935		CASP10	-1.78804	0.000354927
	RAET1K	2.25583	0.00840855		RP11-560G2.2	-4.86145	0.000356912
	IDO1	1.88565	0.00841924		RP11-229A12.2	-4.94304	0.000359411
	PLAU	1.74544	0.00842742		SNRPCP15	-4.65687	0.000365834
	NCR3	2.2338	0.00843147		RP11-34P13.15	-1.81423	0.000366209
	KCNJ15	2.14426	0.0085548		UBBP3	-4.72592	0.000368909
	RPL12P16	3.05107	0.00856802		RP11-322A17.1	-4.03793	0.000370286
	CYP1A1	3.35748	0.00867092		BSND	-2.53268	0.000385118
	ID4	2.07603	0.00868892		DPP3P2	-3.91357	0.000385753
	CFAP61	2.10539	0.00871325		HOXB8	-4.80427	0.00038772
	PIWIL2	2.20135	0.00873089		RIOK3P1	-3.09366	0.000391625
	SERPINB7	3.49486	0.00874993		RP1-136J15.5	-3.14698	0.000393226
	TYRP1	3.18482	0.00881948		GGTA1P	-3.51503	0.000393384
	AC254952.1	2.99989	0.00899762		TARDBPP1	-2.90603	0.000393623
	MMP1	3.34865	0.00911823		AHCYP8	-3.72992	0.000397829
	P2RX2	1.84928	0.00912881		RP11-555H23.1	-3.84165	0.000398574
	NCAM2	2.27031	0.00917993		OAF	-3.63967	0.000399386
	SYN3	1.79385	0.00929902		PITX2	-2.27294	0.000399434
	NPAS4	2.48433	0.00934507		RP4-764D2.1	-3.51849	0.000402803
	KRT223P	2.1086	0.00936543		NMNAT1P3	-4.0885	0.000403171
	SLC2A12	1.65087	0.00942174		TGIF1P1	-3.21966	0.000407434
	SLC16A4	1.64323	0.00951638		SDF2L1	-2.05104	0.000416479
	SLC38A3	2.0926	0.00952457		RP3-406A7.3	-4.34783	0.000417657
	TCAF1P1	2.34977	0.00952956		AC092573.2	-4.82259	0.000419748
	ZNF876P	1.83732	0.00955036		ABCF2P1	-3.64201	0.000421823
	GAB4	2.52518	0.00959261		CER1	-3.96947	0.000422712
	SYT10	1.94832	0.00975279		RP11-51O6.1	-4.6187	0.00042635
	UPK2	2.18993	0.00984275		HNRNPA3P16	-4.49397	0.000426462
	OTOF	2.37656	0.00990606		RP11-367O10.1	-3.55783	0.000436325
	GABRG1	3.34387	0.0100209		HSPA1L	-3.9394	0.000437593
	ICAM5	1.64173	0.0101024		AZIN2	-2.9722	0.000438186
	KIF19	1.76591	0.0101172		CBR3	-2.22024	0.00043819
	CYP4F22	3.29895	0.010244		PRDX1P1	-3.33363	0.000443294
	JPH2	1.85456	0.010286		RP11-758I14.3	-5.70285	0.000443381
	NCAN	1.62043	0.0103035		TRDN	-2.9453	0.000445924
	GNG8	1.73646	0.010359		PTPRN	-1.73222	0.000449926
	AC255361.1	1.78255	0.0103758		FCF1P4	-4.55698	0.000454471
	SSTR3	2.29613	0.0105712		CBSL	-6.56224	0.00045831
	INSM1	1.52049	0.0106765		GAPDHP62	-2.77743	0.000459081
	OR7E91P	1.91336	0.0106931		CCT8P1	-4.34216	0.000463299
	CBLN4	2.31498	0.0107846		RPL15P1	-3.82094	0.000467867
	XG	1.63544	0.010789		AC007238.1	-4.48482	0.000468878
	HHIP	2.07314	0.0108733		PFN1P11	-3.85853	0.000473883
	CTD-2575K13.6	2.31399	0.010913		CTSK	-1.97326	0.000478725
	PCDHGB2	2.02804	0.0110441		RP11-420L9.2	-3.30548	0.000478946
	C6orf118	2.06517	0.0111061		RP11-507K13.6	-2.88155	0.000481051
	DLX1	3.05739	0.0111675		C4orf51	-4.07052	0.000484354
	DUOXA1	2.07882	0.0111942		AC007040.11	-3.69509	0.000488136
	ADAM12	2.10851	0.0112272		RP11-396C23.3	-4.42049	0.000492426
	RP11-613M10.9	2.58662	0.0112312		MMP13	-3.63047	0.000499174
	RP11-29O6.2	1.81581	0.011238		AKR1B10	-4.82624	0.000501129
	AL034550.1	3.32834	0.0113221		SMARCE1P1	-3.14207	0.000501631
	NT5E	2.05085	0.0113354		HOXD9	-2.88315	0.000504413
	ZNF503	2.09069	0.0114188		GP2	-2.88315	0.000504413
	SPX	2.10824	0.0114492		PIP5K1P1	-2.90184	0.000511252
	MYO3B	2.08035	0.0114963		BNIP3P1	-4.5209	0.000511504
	GEM	1.50051	0.0114986		EIF2S3L	-2.84325	0.000512925
	MGLL	2.31697	0.0115737		MPEG1	-3.82389	0.000513881
	AC037459.4	2.83712	0.0117714		HOXA10	-4.3985	0.000520651
	WNT1	4.58169	0.0118131		HMGB1P12	-3.6588	0.000522831
	NOD2	2.5404	0.011842		AFG3L2P1	-3.136	0.000534066
	MYF5	2.48054	0.0118615		PES1P2	-4.54505	0.000539674
	GABRA2	2.07873	0.0119446		FKBP1C	-4.21308	0.000543764
	ADGRF5	2.85711	0.011995		HSPD1P1	-3.98143	0.000544444
	ADGRG3	2.55544	0.0120617		RP1-91J24.1	-4.22953	0.000544602
	RP11-216L13.17	2.82498	0.0121202		SUCLA2P3	-4.47729	0.000554619
	RASGRF1	2.13714	0.0121727		MDGA2	-2.50479	0.000556937
	SHOX	2.69556	0.0122169		RP11-1070B7.3	-3.206	0.000560617
	KCNAB3	1.53418	0.0123761		LGALS12	-2.36462	0.000560799
	C4orf26	2.82769	0.0123781		HOXD8	-3.6133	0.000562611
	CLEC18B	2.81592	0.0126803		PLEKHS1	-3.37055	0.000573875
	CYCSP6	1.96367	0.0127186		CDK5PS	-3.9342	0.000574083
	RP11-475I24.9	2.8151	0.0128083		HOXC4	-2.93462	0.000579202
	CGB2	2.97074	0.0128234		RP11-447H19.1	-3.46998	0.000580328
	CYP4A22	3.19513	0.0129029		BTF3L4P3	-3.51746	0.000580859
	CXCL8	3.53498	0.0133715		RP3-507I15.1	-5.02866	0.000584144
	ARL4C	1.51902	0.0134128		CNN2P10	-3.83645	0.000586926
	HCG4P3	1.7935	0.0134142		NUTF2P6	-4.15418	0.000587347
	PDYN	1.98889	0.0135576		MRPL2P1	-4.70896	0.000590183
	RP11-561B11.2	3.28044	0.0136423		CDC42P6	-4.07048	0.000599153
	HCG4P5	2.33609	0.0136477		AC009413.2	-4.67449	0.000600148
	GBP2	1.94126	0.0137726		CYCSP45	-2.75849	0.000601821
	ZNF469	1.61956	0.0138122		PCSK9	-1.79364	0.000610328
	EPHA5	2.06388	0.0138563		RPL7AP66	-4.57396	0.000614999
	CH507-152C13.3	4.02792	0.0140659		RP11-361A23.3	-3.55343	0.000615352
	C2orf40	1.53644	0.0141249		CBX3P5	-3.48103	0.000615537
	TMEFF1	1.51181	0.0141632		GOT2P2	-3.21114	0.000624973
	ZNF542P	2.81766	0.0141954		PMPCAP1	-3.99761	0.000626734
	ACSM1	1.79899	0.0144521		PDE6G	-1.63998	0.000636566
	FAM109B	2.51526	0.0144888		HNF4A	-4.3713	0.000636979
	MLNR	1.82482	0.0145733		AC004556.1	-5.96945	0.000637779
	CYP26B1	1.93872	0.0146711		TUBBP10	-4.65925	0.000638323
	RP11-251G23.2	2.15288	0.0147058		TRPA1	-3.04299	0.000638666
	BST1	1.64307	0.0147281		FAM19A1	-2.97688	0.000654677
	PGLYRP4	2.71269	0.014833		AC026271.5	-3.84417	0.000662123
	RPS2P32	1.71832	0.014915		ALDH7A1P3	-4.54984	0.000666807
	HMX2	1.8083	0.0149733		GYG1P3	-3.36024	0.00067146
	CD24P4	1.89741	0.0150493		RP11-392E22.5	-2.69851	0.000673932
	WNT8B	2.4256	0.0150657		STK24P1	-3.04886	0.000681618
	ULBP2	2.48097	0.0151686		CDC42P1	-2.65957	0.000685129
	AC069368.3	2.31842	0.0151884		RP11-627K11.1	-2.65957	0.000685129
	LRRC3B	1.58628	0.0153205		DNAJC19P9	-3.64653	0.000685758
	MAPK10	1.61458	0.0155679		OLIG1	-3.34395	0.000693421
	RLBP1	2.94819	0.0155814		DHX9P1	-3.04972	0.000695391
	VWDE	1.56515	0.0156033		RPLP0P11	-3.82255	0.000697343
	KLRF1	2.1487	0.0156685		RP11-429H5.1	-3.82255	0.000697343
	HSPD1P21	1.70972	0.0156957		TCEAL9	-1.62192	0.000698978
	UROC1	1.70972	0.0156957		RP11-730G20.2	-3.46044	0.000702025
	NDUFC2-KCTD14	1.67151	0.0157594		GDF3	-2.41218	0.000720534
	PDE3A	1.59194	0.0157977		TRBC1	-4.21039	0.0007319
	CRB1	1.75382	0.0159829		SEPT7P8	-3.44769	0.000735424
	AL031664.1	3.17124	0.0160452		GBP4	-2.53203	0.000736913
	SLX1B	2.82687	0.0160524		BLOC1S2P1	-4.05951	0.000737074
	ACRBP	1.66097	0.016287		THAP12P3	-3.43987	0.000739373
	SLIT1	2.56731	0.0162959		RP11-384B12.2	-4.28764	0.000748127
	ADHFE1	1.59602	0.0163006		STEAP4	-2.99897	0.000750907
	RNF225	1.98176	0.0163918		GBGT1	-1.55613	0.000756767
	BLNK	2.03973	0.0164535		SLC25A14	-1.6454	0.000757001
	SMYD1	2.21561	0.0165328		MTRNR2L13	-3.74712	0.000768068
	RP11-640N20.9	2.5513	0.0166256		CDV3P1	-3.54435	0.000771152
	SLC4A9	2.23083	0.0166827		RP11-342M1.7	-4.07601	0.000771933
	C10orf107	2.00936	0.0173162		CD163	-2.52411	0.000775008
	MYH7	2.27909	0.0174738		HHLA1	-2.02368	0.000775972
	FIBCD1	1.51355	0.0174922		SOX18	-2.72519	0.000777689
	PAX3	3.42802	0.0175115		RP11-298I3.5	-5.20696	0.000780125
	ARX	1.7279	0.0175677		AIFM2	-1.93918	0.000780927
	FFAR1	1.99594	0.017727		RAP1AP	-3.47594	0.000784274
	PCDHB7	2.35006	0.0177502		RENBP	-1.86487	0.000784316
	DGKI	1.66798	0.0177839		RP11-344L21.1	-4.54333	0.000789725
	PEBP4	2.38598	0.0177865		BZW1P1	-3.11418	0.000794992
	CLDN4	1.87826	0.0177868		RP11-482L11.1	-3.35862	0.000797036
	CNGA1	1.90805	0.0177871		RPL13P12	-4.22869	0.000798918
	SYNC	2.87577	0.0179968		PSMC1P3	-3.16969	0.000799099
	IFITM10	2.14286	0.0182441		PF4	-3.61916	0.000817194
	DDX43	1.93267	0.0182536		SUCLG2P2	-3.38222	0.000819917
	MYADML2	1.78604	0.0183483		LRRC3	-1.77916	0.000826541
	RP11-728K20.1	1.91655	0.0184768		RPL7AP38	-4.37858	0.00083086
	RAB4B-EGLN2	2.57786	0.0185284		THEM6	-1.95325	0.000832396
	ABCA12	2.56674	0.0186833		CLDN11	-1.77375	0.000835295
	SPATS1	2.04052	0.0187292		PPP2R2C	-2.06119	0.000835595
	COL2A1	1.8867	0.0189304		RP3-510O8.3	-3.05589	0.000846814
	PCDHGB7	2.30143	0.019002		HSPE1P9	-4.19191	0.000858092
	KRT16P4	1.75431	0.0190601		SMARCE1P5	-3.9404	0.000864007
	CTD-2086L14.1	1.75431	0.0190601		RP11-8J9.5	-3.64904	0.000869846
	TM4SF1	1.54342	0.0191411		GREM2	-2.5226	0.000870167
	PSD2	1.86843	0.0192031		PARP1P1	-3.00978	0.000882678
	VN1R108P	2.35904	0.0192743		CTC-448F2.3	-3.94107	0.000888249
	DRC1	2.88849	0.0193095		EIF4BP7	-2.65132	0.000891507
	GALR3	2.01957	0.0193995		HOXB6	-4.32615	0.000892416
	SLC24A5	2.12136	0.0195456		RP11-241F15.9	-3.06751	0.000892829
	WDR49	2.00747	0.0198422		POU2AF1	-3.5709	0.000894644
	CPLX3	1.95374	0.019957		HOXD11	-3.19227	0.000896232
	SCN11A	1.9329	0.0200073		KRT8P4	-4.12943	0.000901194
	CRISP2	1.84245	0.0200696		UBE2D3P2	-3.26553	0.000902514
	CACNA2D4	1.65456	0.0201715		RP11-325P15.2	-3.47036	0.000910356
	SPRR1B	3.12838	0.0202067		VDAC1P11	-3.05202	0.000910814
	CDH6	2.45192	0.0202111		PABPC1P4	-3.04663	0.000925469
	BNIP3P10	1.94632	0.0207351		SBF1P1	-3.98975	0.000932878
	WNT4	2.22586	0.0208838		AL591806.1	-2.98933	0.000935452
	SPNS3	1.56678	0.0209293		RPS4XP10	-4.39806	0.000943944
	SNX19P3	1.65122	0.0209593		RP11-18B16.1	-2.77415	0.000952038
	UGT2B15	1.65122	0.0209593		CTD-3141N22.1	-2.77415	0.000952038
	AC000095.9	1.80742	0.0210084		SAA2	-5.11963	0.000952898
	FAM92B	1.85189	0.0211381		VTI1BP1	-3.30777	0.000963136
	CYCSP10	1.81355	0.0213348		RP11-603K19.1	-2.99271	0.000963423
	CGB8	2.60437	0.0214576		NFIA	-3.03799	0.000988185
	SCRT2	1.62071	0.0215227		TLK2P1	-2.90745	0.000997669
	CABP7	1.85571	0.02172		YWHABP1	-3.78392	0.00100082
	FRG1DP	2.04223	0.0219397		RP6-191P20.3	-2.48756	0.00100188
	PTPRO	1.58492	0.0220961		CH17-8C20.5	-2.99271	0.00100314
	LHX8	2.52559	0.0221896		MGAT4A	-2.18176	0.00100404
	LINC00684	1.84989	0.0221944		RP5-854E16.2	-3.74154	0.00102456
	PCSK2	2.52856	0.0221947		ASS1P10	-2.69305	0.00102895
	SECTM1	2.19562	0.0223165		CYP2B7P	-3.83109	0.00103063
	NIPAL4	2.39759	0.0223227		VEGFD	-4.2122	0.00103806
	PRSS56	2.76096	0.0225699		NBEAL1	-2.25042	0.00103818
	PKD2L1	2.14933	0.0226372		CD300E	-4.11364	0.0010476
	WDR45BP1	1.77557	0.0227705		PNKDP1	-4.21812	0.00105079
	BTNL2	1.56226	0.0229921		AC006028.11	-4.29592	0.00106011
	AC073551.1	1.83698	0.0229986		CALM2P3	-3.16994	0.00106118
	LMX1A	2.87697	0.0231599		NPM1P37	-4.34222	0.00106262
	FILIP1	1.66064	0.0233201		THAP12P6	-2.93221	0.00107866
	DLX5	3.6732	0.0234162		VTA1P2	-2.93221	0.00107866
	KCNT1	1.79296	0.0235231		RPL7P57	-3.25866	0.00108536
	GRM3	1.81577	0.0239513		FCF1P6	-4.05401	0.00108691
	RP11-777F6.3	1.876	0.0240377		HNRNPH1P3	-3.40983	0.00109523
	RP5-850E9.3	3.65861	0.0243017		CPB1	-2.67287	0.00109939
	AL049829.1	3.6737	0.0243643		CTB-54O9.9	-2.67287	0.00109939
	SFTPA2	1.57212	0.0245194		EIF5P1	-3.98334	0.00110113
	KRTAP8-1	1.50921	0.024583		MNX1	-3.61189	0.00110255
	MTRNR2L2	1.50921	0.024583		RP11-674I16.1	-3.20117	0.00111909
	CTD-2301A4.1	1.50921	0.024583		HIST1H2BL	-2.7181	0.001126
	CICP5	1.50921	0.024583		MRPL50P1	-2.82929	0.00112776
	CD200R1L	1.50921	0.024583		TBX4	-2.62719	0.00112897
	SLC17A3	1.50921	0.024583		RP11-85G20.2	-3.62345	0.00113675
	PIRT	1.50921	0.024583		GATA6	-3.89681	0.00113834
	PSPHP1	1.50921	0.024583		RP5-836E8.1	-2.98464	0.00114367
	RP5-878I13.2	1.50921	0.024583		AC018442.1	-2.99595	0.00115979
	RPL21P4	1.50921	0.024583		TTC4P1	-2.99595	0.00115979
	TRBJ2-4	1.50921	0.024583		HSPA7	-3.29349	0.00115996
	GAPDHP70	1.50921	0.024583		RP11-795H16.2	-3.61537	0.00117987
	RPL29P19	1.66888	0.0245922		MMP12	-3.82157	0.00119343
	RSPO1	1.86169	0.0246774		HIST1H2BB	-4.04932	0.00119669
	EGR4	2.06918	0.0246918		AC073065.3	-2.78004	0.00121432
	NAALADL1	1.89469	0.0246961		SAA1	-3.08976	0.00123177
	NOS1AP	1.5111	0.0247947		HNRNPA1P8	-3.05247	0.00124635
	RASGEF1C	1.66643	0.0248028		BCAS2P2	-3.79338	0.00126134
	FAM180A	1.80103	0.0248902		CCDC58P5	-3.66976	0.00126814
	RP11-508N22.9	1.7875	0.024938		FGF7	-2.63383	0.00126869
	SPATA31A6	2.91215	0.0251088		EIF3LP3	-4.4934	0.00127028
	AC009950.1	2.65574	0.0251713		CPA3	-2.98106	0.00127326
	TMEM40	2.15831	0.0253991		CTD-3199J23.6	-2.59815	0.00127832
	FNDC1	2.39139	0.0259089		NECAP1P1	-2.63581	0.00130316
	ACPT	2.06429	0.0259763		RP11-178C3.1	-2.79327	0.00130758
	ACER2	1.76935	0.0261944		GOT2P3	-3.11782	0.0013078
	GJB5	1.52226	0.02635		CROCCP1	-2.36973	0.0013154
	HDC	2.49399	0.0264252		ARPC3P1	-2.36973	0.0013154
	RP11-729L2.2	2.20971	0.0266002		CYP4F9P	-2.73349	0.0013209
	ZNF736P9Y	2.20971	0.0266002		RPL5P8	-4.29921	0.00132189
	PSG4	3.31954	0.026628		GS1-590J6.2	-3.10746	0.00134057
	HNRNPA1P4	1.79643	0.0270532		CPA6	-3.21938	0.00134131
	RP11-342L8.2	1.67518	0.0273817		LRRK2	-2.85225	0.00134187
	RP11-119F19.4	1.67518	0.0273817		GIMAP2	-3.08515	0.00134679
	GAGE1	1.67518	0.0273817		CTB-52I2.4	-2.60784	0.00134691
	CD69	2.09243	0.0274256		ACHE	-1.7297	0.00134708
	PCDHGB4	1.76041	0.0275757		CTD-2545M3.6	-4.35339	0.00135532
	PTH2	2.08058	0.0275996		RANP6	-3.92698	0.00135548
	LRRC37A15P	2.19734	0.0277055		HLA-DRB4	-2.81365	0.00136016
	TMEM265	1.63773	0.0277155		NEDD4	-1.57875	0.00136576
	DPYS	1.71372	0.0279065		HNRNPA1P7	-2.63306	0.00136961
	AL592183.1	2.8122	0.0281626		TDGF1P3	-2.6741	0.00138434
	CLEC7A	1.85722	0.0281732		RP11-104D3.2	-3.08292	0.00138922
	METTL11B	1.6078	0.0283051		FAF2P1	-2.50187	0.0013928
	SLC39A2	2.19493	0.0283056		POSTN	-2.61834	0.00139812
	PADI1	1.75566	0.0283351		DCAF13P3	-3.74171	0.00139921
	TRAPPC13P1	1.89656	0.0284628		HIST1H2AJ	-4.36297	0.00140746
	RIIAD1	1.95264	0.0285155		SDCCAG3P2	-3.14931	0.00142725
	MAP6	1.50601	0.0285366		UBE2L4	-3.51075	0.00142848
	C9orf50	1.59287	0.0286398		AC073109.2	-3.42998	0.00143265
	SGCG	1.83457	0.0288984		KHDC1L	-2.82077	0.00144149
	EREG	2.08194	0.0289632		PRG4	-4.04228	0.00144417
	AC254944.1	1.77857	0.0290184		HSP90AA5P	-4.2985	0.00144494
	OR6E1P	1.77857	0.0290184		EEF1A1P38	-2.74938	0.00144625
	LHX4	2.07256	0.0291145		SEC1P	-2.27543	0.00144683
	TRPM8	1.78218	0.0292602		TPSB2	-2.74115	0.00147371
	MYO7B	1.67137	0.0303311		RBMXP1	-3.46152	0.00149572
	KCNH1	1.8509	0.0305889		SCARF1	-1.93622	0.00151167
	SUB1P2	1.77408	0.0308687		RP11-295H24.3	-2.72769	0.00151205
	RPL15P2	1.58834	0.0308989		RPL7AP60	-3.37684	0.00151663
	RP1-169I5.4	1.58834	0.0308989		EIF1P4	-3.90504	0.00151719
	RPL29P12	1.58834	0.0308989		FOXP2	-2.78571	0.0015487
	AC006014.7	2.35551	0.0310173		METTL7A	-2.06762	0.00156075
	HES2	1.67735	0.0310542		RP1-97D16.1	-2.95526	0.00156299
	SMIM5	1.86211	0.0310562		TGFB3	-2.26799	0.00156357
	MC5R	1.95839	0.0310918		RP11-400K9.2	-3.48137	0.00156366
	RP11-216N14.5	1.81832	0.0312632		ENPP7P1	-2.70232	0.00157318
	CXCL2	1.94465	0.0316291		CTC-539A10.7	-2.41531	0.00159425
	C1orf101	2.14659	0.0316671		PLSCR2	-4.18884	0.00161881
	CTD-2116N17.1	1.56979	0.0318882		H3F3C	-3.75076	0.00164051
	ADCYAP1	3.25995	0.0319334		APBB1IP	-2.19245	0.00165168
	TNXA	2.88099	0.0322044		GPR149	-3.01186	0.00166468
	PCDHGA11	1.69965	0.0322448		CD2	-3.36065	0.00167057
	PARK2	1.63605	0.032315		AC064850.4	-3.91536	0.0016911
	GALP	4.14115	0.0323452		NBPF20	-1.80221	0.00169832
	OTOR	1.60679	0.0323646		TMPRSS11E	-1.84283	0.00170076
	ZNF259P1	1.78158	0.0324145		UNC93B6	-3.24393	0.00172123
	AQP9	2.12267	0.0325022		TCF15	-1.60039	0.00172293
	OLFM3	2.04282	0.0326949		FARSBP1	-3.74645	0.00173956
	NPR3	1.70177	0.0328104		GSTM5P1	-2.57597	0.00175914
	IVL	2.17812	0.0329023		CTD-2200P10.1	-2.42515	0.00176356
	GTF2IRD1P1	2.17812	0.0329023		ETV4	-1.50945	0.00177096
	CNTFR	1.85048	0.0336088		USP18	-1.62065	0.00177232
	CEACAM7	1.52389	0.0339209		CALML3	-2.63871	0.0017766
	RP3-336K20__B.2	1.52389	0.0339209		HOXD4	-2.49211	0.00178738
	C17orf78	1.52389	0.0339209		HNRNPKP3	-3.76575	0.00178834
	RP11-630I5.1	1.52389	0.0339209		RP11-113I24.1	-2.46308	0.00179308
	KRT24	1.52389	0.0339209		SEPT7P6	-2.32887	0.00181742
	TRIML1	1.52389	0.0339209		CDC27P2	-2.32887	0.00181742
	RP11-778D9.4	1.54063	0.0339428		MT1JP	-2.69089	0.00181934
	BPIFB9P	1.54063	0.0339428		DNMT3L	-2.55801	0.00182111
	ERAP2	1.66189	0.0340304		RNF19BPY	-2.51424	0.001827
	GALNT9	2.22125	0.0342102		GOLGA8CP	-2.51445	0.00183552
	NRAP	2.29795	0.0345861		TBX15	-2.63243	0.00185279
	PNLDC1	1.6784	0.0348683		RP11-430C1.2	-3.70444	0.00186064
	CFHR1	1.76235	0.0351128		API5P1	-2.38541	0.00187787
	CCDC140	2.75327	0.0351977		PIP	-2.80517	0.0018831
	KLHL40	2.05703	0.035393		RP11-382D8.5	-2.69774	0.0019016
	REG4	2.05703	0.035393		FAM58BP	-3.11075	0.00193076
	TUSC1	2.08632	0.035549		ICAM2	-2.22043	0.00193504
	TNS4	1.85971	0.0359857		RP11-235G24.2	-2.3867	0.00193532
	CTD-2331H12.8	3.0062	0.0360142		MYL12BP1	-2.3867	0.00193532
	CTD-2192J16.17	2.06899	0.0370629		HNRNPKP1	-3.35527	0.00193748
	EN2	2.06899	0.0370629		RP11-391L3.5	-2.2885	0.00194685
	CNTN4	1.63395	0.0370829		COPS5P1	-3.33077	0.00199629
	KCNH5	1.72072	0.0371126		NUPR1	-2.05654	0.00201206
	DMBX1	2.63838	0.0372623		RP11-516A11.1	-3.88332	0.00206777
	AGR2	2.88951	0.0377558		ATP6V0E2	-1.53226	0.00206798
	ZNF826P	2.31935	0.0380255		CYCSP52	-3.18991	0.00208986
	FNDC8	1.70038	0.0382147		SCGB2A2	-3.18991	0.00208986
	ZNF682	2.02785	0.0386919		HAS2	-2.19444	0.00209116
	TCP11	1.60992	0.0393175		CSHL1	-2.34112	0.00209159
	RPS9P1	2.02633	0.0394257		FSHR	-3.68279	0.00210948
	FAM69C	2.51267	0.0394417		MRPS18AP1	-2.46798	0.00211874
	SGCA	1.68171	0.0394539		PFN1P10	-4.4755	0.00212875
	RNF223	1.59713	0.0394928		SLC16A3	-1.69132	0.0021483
	BGLAP	2.3977	0.03964		EIF4BP6	-3.01662	0.00215043
	HHIPL2	1.88867	0.0398907		NCF1B	-2.93689	0.0021509
	UGT2B7	1.82963	0.039932		CHCHD3P1	-3.32387	0.00219044
	UTY	1.95279	0.0405259		RP11-471G13.2	-4.20608	0.00224406
	GS1-259H13.7	2.48419	0.041034		LAMC3	-1.91531	0.00224513
	C1orf105	1.89064	0.0415451		DSCAM	-3.05186	0.00225191
	CGB5	1.89064	0.0415451		ADAMTS7P4	-3.19242	0.00225665
	LTB	1.52042	0.0418771		T	-3.73817	0.00227517
	RP11-96L14.7	2.07302	0.042324		RPS24P8	-2.21218	0.00230158
	EDN2	1.64589	0.042438		PNPT1P1	-2.21218	0.00230158
	RP11-318C24.1	1.57232	0.0425768		RP11-484D2.3	-2.21218	0.00230158
	CDH17	2.06918	0.0428014		RP11-34P1.1	-2.21218	0.00230158
	PCDHGB5	1.63146	0.042944		PRR29	-2.35895	0.00230483
	RGS4	1.95675	0.043214		RP11-490K7.1	-3.46505	0.00231477
	AL354828.1	1.50315	0.0434627		GAL	-2.12717	0.00233263
	SERPINB2	4.18707	0.0437002		ABCC9	-1.98899	0.00233594
	C7orf57	1.61122	0.0444367		UBA52P8	-2.26422	0.00233942
	DSG1	2.23312	0.0447144		PALMD	-2.60336	0.00234362
	NR2F1	2.48101	0.045002		SRPK2P	-2.21357	0.00237835
	SLAMF9	2.17636	0.0450195		FGF8	-2.54752	0.00238349
	TMEM173	1.63095	0.0450834		ADAMDEC1	-2.3165	0.00239728
	OTOA	2.28168	0.0451284		AC087499.5	-2.3165	0.00239728
	RASA4DP	1.93212	0.0452835		IGLV1-47	-2.3165	0.00239728
	C22orf31	2.09379	0.0454223		AC005014.5	-3.54665	0.00240113
	MAB21L2	3.13279	0.0456016		ENTPD2	-1.61737	0.00240942
	HCG22	1.88219	0.0456196		HLA-F	-1.76139	0.00243732
	CTC-559E9.12	1.7441	0.0462034		AC226119.4	-2.87322	0.00244863
	GRK7	1.58502	0.0464276		RP11-364B14.3	-1.8758	0.00245855
	DCT	2.14957	0.0469697		HIST1H2BF	-2.72921	0.00246688
	SPRR2A	1.91514	0.0470654		ST13P13	-2.72921	0.00246688
	GNL3LP1	2.4239	0.0474146		TYRO3P	-3.4577	0.00247751
	RP11-565P22.6	1.6433	0.0479551		ARG1	-2.55567	0.00248209
	NR5A1	1.62108	0.0481276		PPEF1	-3.4473	0.00249234
	LRCOL1	1.56214	0.0483768		RP13-88F20.1	-2.46549	0.00254668
	RP11-435I10.3	1.56214	0.0483768		ACTG1P9	-2.58119	0.00256174
	EIF5AP2	1.56214	0.0483768		RP11-641A6.5	-2.86798	0.00257236
	KIF25	1.73954	0.0485654		BTBD6P1	-2.94633	0.00260274
	TFAP2A	2.17629	0.048639		RP11-611O2.2	-2.22289	0.0026029
	PSG1	1.69951	0.049132		TIMM9P2	-2.22289	0.0026029
	CNBD2	1.5526	0.0494916		AC139143.2	-3.04127	0.00262229
	AL109923.1	3.18353	0.0497674		HIST2H2AB	-3.04127	0.00262229
					PLEK	-3.06868	0.00263724
					FABP3P2	-3.64065	0.00264434
					RP11-452N17.1	-4.50513	0.00265306
					ERBB4	-3.93818	0.00267661
					PARP15	-2.40927	0.00267776
					RAB40A	-1.81643	0.00270956
					ASPN	-4.10342	0.00272189
					SERBP1P6	-3.40847	0.00273045
					ACSM4	-4.10238	0.00275539
					VAMP8	-1.71556	0.00275662
					SULT2A1	-3.0968	0.00275968
					TNFSF14	-3.06159	0.00277894
					HOXB13	-2.65177	0.00278558
					RP11-299H22.3	-2.67101	0.0027873
					RP11-134F2.8	-2.05051	0.00279492
					RP11-20L24.1	-2.99374	0.00279737
					WTH3DI	-3.58523	0.00283317
					MYCT1	-3.42213	0.00286949
					OR52A1	-3.15475	0.00287771
					TAC4	-3.00545	0.00287863
					BRD7P5	-3.03488	0.00290946
					RPS8P6	-3.03488	0.00290946
					NUTM2E	-2.6033	0.00299497
					ARHGEF15	-1.83117	0.00300075
					MID2	-2.04428	0.00300348
					PRAME	-2.17206	0.0030168
					RP11-177C12.4	-4.01163	0.00302596
					WBP11P1	-3.075	0.00310025
					PSAPL1	-3.23976	0.0031142
					RP11-72K17.1	-2.92648	0.00311715
					ARL2BPP2	-3.30505	0.00312897
					CTD-2179L22.1	-2.90096	0.00313754
					TFF3	-2.1427	0.00314963
					AC016716.1	-3.45613	0.00316069
					MSMB	-3.53689	0.00316388
					EEF1DP5	-3.99048	0.00316449
					CDC20P1	-2.85855	0.00317596
					HIST1H2AI	-1.97205	0.00319749
					RP11-597D13.7	-2.76426	0.00320101
					ITGAX	-1.82174	0.00320413
					SPRR2G	-3.11	0.00320782
					ZAP70	-4.19703	0.00321714
					DNAJB1P1	-2.87483	0.00322127
					GPR62	-2.53436	0.00322556
					FAM83F	-1.7403	0.00322674
					UAP1L1	-1.5383	0.00322927
					TUBB7P	-3.22949	0.00323822
					HERC2P8	-2.32893	0.00324822
					RP11-97C18.1	-2.22967	0.00329732
					AC016700.6	-2.22967	0.00329732
					RPL5P33	-2.22967	0.00329732
					TUBB4BP2	-3.70177	0.00330053
					RPL31P11	-3.14329	0.0033042
					RP11-613H2.2	-3.71409	0.00337069
					DNM1P33	-3.14481	0.00339347
					KLK2	-2.35926	0.00340245
					CD7	-2.0999	0.00340463
					TCP1P1	-2.8897	0.00340526
					KRT8P48	-3.66572	0.003411
					RP1-22N22.1	-3.12222	0.00342438
					CYP2B6	-2.54495	0.00343194
					LMNTD1	-3.45778	0.00345715
					RP11-281P11.1	-2.46144	0.00345785
					PHBP13	-2.46144	0.00345785
					FAM58DP	-2.73879	0.00349163
					AC012066.1	-3.17526	0.00349533
					HERC2P5	-2.23806	0.00350902
					SLC1A1	-1.53387	0.00352312
					HOXB7	-3.49891	0.00353797
					CTAGE1	-2.94838	0.00356877
					ISCA2P1	-2.72448	0.00357349
					RAB17	-2.31818	0.00359753
					SH3RF3	-1.91436	0.00362094
					FAM58CP	-3.06093	0.00362116
					MYLK2	-3.35055	0.00362795
					HIST1H2BI	-2.5683	0.00365494
					RPL12P14	-2.54679	0.00367447
					RP11-157J24.1	-2.54679	0.00367447
					AZGP1P1	-2.96251	0.00367994
					RPL23AP43	-2.0563	0.0037892
					RP11-9E13.4	-2.0563	0.0037892
					RP11-347C12.12	-2.0563	0.0037892
					CELA1	-2.0563	0.0037892
					RP11-571E6.1	-2.88714	0.00379743
					FGFRL1	-1.55952	0.00382562
					QRFPR	-2.1544	0.00383254
					CHMP4C	-1.61166	0.00384975
					NADSYN1	-1.54108	0.00386431
					C10orf90	-2.29255	0.00387438
					MRC1	-3.30075	0.00388523
					RP4-724P12.1	-2.61992	0.00391408
					HMGN2P40	-2.61992	0.00391408
					RP4-654C18.1	-3.18827	0.00391945
					FTLP5	-3.37718	0.00394402
					SOCS5P5	-2.15822	0.00395584
					CLRN1	-2.41425	0.00402349
					ARHGAP40	-2.52089	0.00403289
					NYAP2	-2.3029	0.00404106
					RP11-60C6.8	-2.3029	0.00404106
					MYRIP	-1.90129	0.00411336
					SLC9A9	-2.08301	0.0041308
					CTB-95D12.1	-2.48505	0.0041346
					RP11-328C8.2	-3.04084	0.00414029
					RP11-654F3.1	-2.65643	0.00414063
					AMH	-3.72211	0.00414316
					SPANXB1	-2.06479	0.00415102
					SLAMF1	-2.06479	0.00415102
					RP11-249C24.12	-3.48198	0.00415222
					SSX5	-2.68375	0.0041627
					AC129492.1	-3.70591	0.00417099
					RP11-956A19.1	-3.02556	0.00417402
					NLRP7	-2.22396	0.00418637
					LLNLF-176F2.1	-1.71418	0.0041937
					MSR1	-3.06676	0.0042644
					CDK7PS	-3.08314	0.00426452
					CYP4F3	-2.79238	0.00430363
					RNF126P1	-3.20196	0.00431793
					LCN1	-2.055	0.00433406
					GHR	-2.2287	0.00436967
					MTCO1P24	-2.06721	0.00437581
					RP1-274L7.4	-2.06721	0.00437581
					SLC1A4	-1.88966	0.00437753
					SNX18P7	-2.30719	0.00438071
					SCGB1D2	-2.0007	0.00439114
					NODAL	-2.83814	0.00439729
					RP13-33H18.1	-2.27239	0.00444442
					AC009263.2	-2.23683	0.00444943
					ACE2	-5.21202	0.00446441
					RHBDF1P1	-3.22443	0.00448025
					SUPT20HL2	-3.52455	0.00451938
					AC112497.1	-1.59149	0.00452714
					ASB9	-1.65244	0.00454554
					TMC8	-2.36029	0.00462696
					NUCKS1P1	-2.91729	0.00463553
					ST13P18	-3.39318	0.00465231
					NLRP2	-2.08468	0.00465677
					RP11-47F1.1	-2.79118	0.00465968
					PLA1A	-2.86706	0.00467727
					SH3GL1P2	-2.58048	0.00469285
					HLA-DRB5	-4.00624	0.00470556
					KCNJ10	-2.39072	0.00472331
					RAP1BP1	-2.78489	0.0047434
					CHCHD3P3	-2.49498	0.00477959
					CTB-159G17.4	-1.94798	0.0048125
					ANKRD7	-1.94798	0.0048125
					SLC31A1P1	-1.94798	0.0048125
					GMNC	-1.94798	0.0048125
					RP11-23F23.3	-1.94798	0.0048125
					CTB-14A14.2	-1.94798	0.0048125
					RP11-154D3.1	-1.94798	0.0048125
					PM20D1	-1.94798	0.0048125
					GPC4	-1.5307	0.00481282
					HCST	-1.83043	0.00483187
					DEC1	-1.94833	0.00487514
					AKR1D1	-2.33728	0.00487751
					CTD-2666L21.2	-2.58042	0.00489478
					HNRNPA1P18	-2.58042	0.00489478
					SMARCE1P3	-2.58042	0.00489478
					EEF1A1P16	-3.20257	0.00491241
					EIF3CL	-2.26562	0.00492217
					NXPH4	-1.73782	0.004924
					RP3-454G6.2	-2.68749	0.00492889
					ENO1P1	-1.83937	0.00493742
					SBSPON	-1.74256	0.00496279
					USP26	-1.94939	0.0049666
					UBASH3A	-1.94939	0.0049666
					SGCD	-2.69604	0.00497944
					RP11-126D17.1	-3.65612	0.00500036
					RP11-122G18.7	-2.2632	0.00504266
					HNRNPA1P46	-2.65354	0.00506136
					RP11-958J22.2	-2.65354	0.00506136
					RPL12P12	-3.23258	0.00506521
					SERPINI2	-2.33885	0.00507852
					CTD-2102P23.1	-3.04491	0.00510725
					ATG4A	-1.73958	0.00517149
					RP11-641C17.1	-3.36318	0.0051841
					RP11-129H15.4	-2.83357	0.00520605
					HMGB3P24	-2.30529	0.00521409
					MAPRE1P1	-3.08111	0.00526215
					ACSL5	-3.78558	0.00528609
					BCL2L2-PABPN1	-2.37168	0.00530074
					RP11-497H16.7	-2.20212	0.00534902
					TISP43	-2.39276	0.0053496
					NPM1P9	-2.20643	0.00537185
					TXNDC2	-2.26769	0.00538976
					PRRX1	-1.59367	0.00539236
					C22orf46	-1.61741	0.00539561
					PRSS1	-3.69054	0.00543929
					MT3	-2.88015	0.00544083
					CHTF8P1	-2.77401	0.00545451
					RPL12P21	-3.41768	0.00545621
					AC026248.1	-1.83843	0.00547146
					MTHFD2P7	-2.72139	0.00547837
					UGT2B11	-2.26034	0.00552013
					HP	-4.058	0.00552695
					TMEM74B	-1.54437	0.00553784
					GP1BB	-3.7672	0.00559733
					HIST1H2BN	-2.09655	0.00562654
					PTBP1P	-2.69569	0.00562703
					GPR75-ASB3	-2.32347	0.00563587
					CYCSP48	-2.8248	0.00566299
					RPSAP25	-6.48705	0.00573703
					MC2R	-2.61256	0.00580835
					GUCA2A	-3.61923	0.00580917
					ELOVL2	-2.06023	0.00603614
					PTPRB	-1.57758	0.00603973
					RP11-483G21.3	-1.88436	0.00609276
					HPRT1P2	-2.27619	0.00611997
					HNRNPA1P74	-2.27619	0.00611997
					KCNJ3	-3.12486	0.0061244
					LLNLF-173C4.2	-4.58787	0.00612577
					AC007899.3	-2.08979	0.0061389
					RP11-163G10.2	-3.22039	0.00615516
					ARSF	-2.01652	0.00618026
					IGSF10	-2.38659	0.00618504
					RP11-718B12.1	-3.516	0.00618829
					NUS1P4	-2.37909	0.0062336
					HOXA6	-2.14693	0.00627904
					NFIX	-1.93064	0.00630446
					NPL	-1.90871	0.00631039
					CD93	-3.0967	0.00632895
					ONECUT1	-2.00026	0.00633931
					CTD-2537I9.19	-1.95377	0.00633993
					AJAP1	-1.88307	0.00634715
					ITM2A	-1.52758	0.00635131
					CRLF1	-1.58607	0.00638175
					OLIG2	-2.76971	0.00639168
					RPSAP69	-2.27965	0.0063979
					RP11-411B10.8	-2.57257	0.00641492
					AC109631.1	-1.96034	0.0064696
					AC000077.2	-2.98842	0.00647448
					CST1	-3.97028	0.00653368
					CYBB	-3.23634	0.00654314
					DMTN	-1.50152	0.00660231
					RP11-438O11.1	-2.09431	0.00660417
					BET1P1	-2.09431	0.00660417
					MARCH11	-2.33629	0.0066324
					REP15	-2.84583	0.00663358
					AKR7A3	-1.79088	0.00663554
					C1QA	-3.54227	0.00666407
					RPS4XP1	-2.53743	0.00672461
					RP11-10L12.2	-2.53743	0.00672461
					RP11-497H16.8	-2.53743	0.00672461
					RPS4XP19	-2.53743	0.00672461
					GIP	-1.78787	0.00675417
					VDAC1P3	-2.29804	0.00675724
					PLA2G12AP1	-2.33466	0.00679324
					CYP4F12	-2.84346	0.00684031
					LLNLF-173C4.1	-3.22267	0.00685795
					CAT	-1.7876	0.00692159
					SGIP1	-2.24605	0.00697472
					AC005682.6	-2.08451	0.00697587
					RPL10P3	-1.79187	0.00697713
					RP11-536C10.11	-1.79187	0.00697713
					RP11-631M6.2	-1.79187	0.00697713
					FAM157A	-1.51281	0.00701487
					PTPN22	-2.5053	0.00702459
					RP11-44D5.1	-2.01728	0.00702996
					CTC-250P20.2	-3.08364	0.00703566
					RP11-434I12.5	-3.17667	0.00714733
					PLAC8L1	-2.54157	0.0071726
					TDRD7	-1.75375	0.00718452
					LST1	-2.13239	0.00718626
					NMD3P1	-3.11172	0.00721303
					RPS13P2	-2.60458	0.00721894
					LEFTY1	-3.63072	0.00724177
					CYP4F11	-2.6742	0.00727809
					RPL7L1P12	-1.97358	0.00728739
					RPL12P8	-1.97358	0.00728739
					STAP1	-1.97358	0.00728739
					B3GNT2P1	-1.97358	0.00728739
					SRP72P1	-1.97358	0.00728739
					DHX40P1	-1.97358	0.00728739
					GAPDHP64	-1.97358	0.00728739
					RP11-848G14.2	-2.03047	0.00730557
					BRD7P2	-2.02568	0.00737655
					AZGP1	-3.56322	0.00743121
					RPS7P11	-2.02683	0.0075429
					CDR1	-1.99371	0.00770009
					RPL5P5	-1.97712	0.00771792
					NBL1	-1.83085	0.00772286
					RP11-428L21.2	-1.95215	0.0078623
					RP11-1012A1.7	-3.53179	0.00788578
					KRT8P5	-4.91365	0.00790432
					AHCYP2	-2.88895	0.00796399
					CRYGB	-2.37289	0.00802184
					SLC46A3	-2.14882	0.0080371
					RP11-168P6.2	-2.68598	0.00811402
					ACTG1P12	-1.89848	0.00812952
					THAP12P9	-1.89848	0.00812952
					RP11-265B8.5	-2.30487	0.00813486
					ABCA8	-1.84378	0.00817623
					PLEKHA3P1	-1.84378	0.00817623
					C12orf50	-1.68805	0.00819615
					RGS1	-2.82331	0.00819715
					RASL10A	-2.48559	0.00823604
					GSTM3	-1.62694	0.00826793
					ALS2CR12	-1.89967	0.00833135
					HSPD1P5	-2.41988	0.0083898
					SMCO2	-2.03523	0.00853273
					AC108463.2	-1.84586	0.00856685
					RPS6P12	-2.69855	0.00858994
					FAM78B	-2.09425	0.00867871
					PTPRVP	-2.48626	0.00868646
					CD80	-2.13098	0.00886142
					RGPD1	-2.67836	0.0088724
					CD3D	-2.09006	0.00889005
					FTH1P16	-2.26953	0.00898412
					DAZAP2P1	-1.85819	0.00902534
					KCNK2	-2.80534	0.00908674
					ZNF511-PRAP1	-1.80831	0.00908856
					HOXA7	-3.10339	0.00915123
					PRSS2	-3.34963	0.00923433
					C1orf162	-2.35338	0.00925818
					RP11-137N23.1	-2.74577	0.0092633
					KIF12	-1.5086	0.00934547
					ZACN	-4.37061	0.00935532
					TUBAP2	-2.1414	0.00942264
					LYZ	-2.99531	0.00943132
					TRPC7	-3.52421	0.00950425
					RP11-411B10.5	-2.12097	0.0095238
					NMNAT1P1	-2.12097	0.0095238
					KDELC1P1	-2.12097	0.0095238
					BMI1P1	-2.12097	0.0095238
					CRIP1	-1.52483	0.00953371
					GMCL1P1	-1.99185	0.00954417
					TIMD4	-1.99185	0.00954417
					RP11-555K12.1	-1.99185	0.00954417
					FTH1P11	-1.99185	0.00954417
					HCLS1	-1.55053	0.00955581
					PLA2G5	-1.91139	0.0095917
					HNRNPLP2	-1.82775	0.00962993
					MYL7	-3.11775	0.00964574
					RPL9P25	-2.12577	0.00969485
					JCHAIN	-3.69468	0.00972615
					RNF113B	-2.12307	0.00975408
					ATP13A5	-2.12307	0.00975408
					KCNK4	-2.0568	0.0097739
					RNMTL1P2	-2.22394	0.00980023
					RP11-136G2.1	-2.12658	0.00982745
					CD79B	-1.86428	0.0099517
					PRPF38AP1	-2.22604	0.0100057
					CYMP	-2.22604	0.0100057
					MGP	-3.98219	0.0100503
					FRG1GP	-2.37901	0.0100776
					DNAJA1P5	-2.30956	0.0101824
					ATF4P2	-2.30956	0.0101824
					ATF4P1	-2.30956	0.0101824
					RP11-350O14.18	-2.35031	0.0102349
					CX3CR1	-1.83379	0.0102507
					AK4P6	-1.83379	0.0102507
					CCDC81	-3.12902	0.0103942
					CTSW	-1.94119	0.0103987
					SETP1	-1.81813	0.0105599
					VTI1BP3	-1.81813	0.0105599
					RP11-123M21.2	-1.81813	0.0105599
					ME2P1	-1.81813	0.0105599
					AP000619.6	-1.81813	0.0105599
					CTD-2063L20.1	-1.81813	0.0105599
					AC019109.1	-1.81813	0.0105599
					CST2	-3.71852	0.0105703
					SHOX2	-3.12463	0.0105763
					RP11-963H1.1	-2.38271	0.0106016
					ADH1B	-1.83539	0.0106033
					CTAGE4	-1.58131	0.0106285
					ZNF600	-1.68775	0.0106484
					MZB1	-2.90993	0.0106557
					LRRC25	-2.74001	0.0106558
					RP3-497J21.1	-1.72765	0.0107221
					CECR7	-1.58287	0.010756
					FSIP2	-1.88589	0.0107697
					RP4-744I24.4	-2.3847	0.0107813
					PDZD4	-1.71257	0.0108873
					SFTPB	-1.84869	0.0108888
					MTCYBP19	-1.82038	0.0109094
					HIST3H3	-1.82038	0.0109094
					MTHFD2P3	-1.82038	0.0109094
					FTLP1	-1.82038	0.0109094
					CTD-2501O3.2	-1.82038	0.0109094
					SLC22A16	-1.62417	0.0109767
					PITX1	-3.49344	0.0109918
					GZMH	-1.99616	0.0109948
					CKAP2P1	-1.9185	0.0109996
					RP1-261D10.1	-2.44653	0.0110296
					PHF2P2	-2.35099	0.0110723
					GLRA3	-2.05971	0.0110792
					RYKP1	-2.12768	0.011143
					RP11-713P14.1	-2.44849	0.0112006
					AP000351.13	-1.98551	0.0112692
					HIST1H2BG	-1.90461	0.0112797
					CSNK2A3	-2.99028	0.0113316
					GAPDHP66	-1.82531	0.011375
					RP11-360O19.5	-1.82531	0.011375
					RP11-361M4.1	-1.82531	0.011375
					CNNM1	-1.54471	0.0114047
					IL15RA	-1.87369	0.0114185
					RP11-381E24.4	-2.12096	0.0114213
					CATSPER3	-2.41968	0.0114317
					ZFYVE9P1	-2.50311	0.0114522
					ESR1	-3.24674	0.0114733
					TEX101	-2.45978	0.0115141
					SERBP1P3	-2.47515	0.0115236
					CD300A	-2.44805	0.0116125
					RP11-967K21.2	-2.50507	0.0116149
					USP50	-2.50507	0.0116149
					IGHG3	-4.16587	0.011679
					HLA-DRB1	-2.62681	0.0118673
					RP13-395E19.4	-1.924	0.0118882
					PDE1A	-1.81775	0.0118886
					RNF183	-2.46061	0.0118906
					OR2A1	-2.46587	0.0119893
					CDH12P2	-2.06136	0.0120223
					ZNF571	-1.56326	0.0120744
					SAMD3	-1.59145	0.012137
					RP11-417L14.1	-2.21541	0.012159
					ENPP7P7	-1.83013	0.0122089
					TM6SF1	-1.88463	0.0122139
					RGN	-1.97633	0.0123484
					ZNF799	-1.50291	0.0124913
					HIST1H4H	-1.63665	0.0125008
					CXCR4	-2.47967	0.0125873
					CCKBR	-1.91913	0.012614
					IZUMO1R	-1.70885	0.0126453
					DNAJC5B	-1.70885	0.0126453
					CYP4B1	-1.70885	0.0126453
					XPOTP1	-1.70885	0.0126453
					NDUFB5P1	-1.70885	0.0126453
					TTC24	-1.70885	0.0126453
					CITED1	-1.67883	0.0126928
					ACTR3P3	-3.20772	0.0127651
					MRGPRX3	-1.86463	0.0127651
					RP11-7D5.2	-3.24035	0.0127787
					HIST1H2BJ	-1.67857	0.0128436
					KB-1125A3.13	-1.85204	0.0128461
					HBB	-3.66428	0.0128642
					FCGR2A	-2.08081	0.0128708
					HSP90AB4P	-1.97215	0.0128907
					ABHD12B	-1.67042	0.0129305
					PSMC1P5	-2.54231	0.0129501
					ACTG1P10	-1.67838	0.0130539
					FTH1P20	-2.19968	0.0130933
					CHRNA10	-2.5223	0.0131028
					CHMP4BP1	-1.87072	0.0131293
					SIDT1	-2.55263	0.0131491
					AC006987.4	-2.25878	0.0131557
					BX842568.2	-1.80476	0.0131952
					AP003068.18	-2.10628	0.0132453
					NPY1R	-2.52802	0.0132486
					FMO5	-1.64203	0.0132901
					NPNT	-1.5001	0.0133021
					UNC93A	-2.3771	0.013312
					LANCL3	-1.77225	0.0133711
					DKK4	-2.68806	0.0133824
					RP11-241F15.5	-1.71258	0.0134065
					PDCL3P3	-1.71258	0.0134065
					PAICSP5	-1.71258	0.0134065
					CAMP	-1.71258	0.0134065
					CYP4F8	-2.03345	0.013572
					CASQ1	-1.51914	0.0136372
					EIF1P7	-2.75197	0.0136676
					DPEP2	-1.77064	0.0137568
					RLN2	-1.68133	0.013782
					PCDHA8	-1.88858	0.0138078
					SPDYE11	-1.75195	0.013828
					SNAP23P1	-2.04745	0.0138463
					SEPHS1P4	-2.06126	0.0138801
					FCMR	-1.82275	0.0140134
					IL9R	-2.49793	0.0140416
					KRT8P10	-2.29712	0.0142407
					SLC22A9	-1.95449	0.0143695
					MFSD13B	-1.95449	0.0143695
					KCNG4	-1.74404	0.0143941
					ZG16B	-1.94597	0.0144278
					HIST1H2AM	-1.61025	0.0145005
					RP11-134G8.6	-1.95444	0.0145295
					RPS3AP42	-2.84143	0.0145889
					GUCY2D	-2.24655	0.0146416
					AVP	-1.82524	0.0147702
					NAP1L4P1	-1.62399	0.0148601
					TFEC	-2.19147	0.0149147
					AMIGO2	-1.70229	0.0149668
					DNAJC22	-2.17851	0.0151842
					MCF2	-1.83012	0.0152284
					CFAP100	-2.5962	0.0152303
					PFN1P2	-2.5585	0.0154126
					RP1-241P17.4	-2.45196	0.0154211
					SGK3	-1.58612	0.0155205
					HIST4H4	-1.56504	0.0155869
					ULK4P3	-2.75377	0.0156015
					PDE7B	-2.98664	0.015692
					YY2	-2.13575	0.0157058
					NRK	-1.88465	0.0157634
					HSP90AB7P	-2.85512	0.015765
					CFAP47	-1.82038	0.0157797
					SLX1A	-1.89392	0.0158023
					VSTM1	-1.66751	0.0158579
					LCE1A	-2.96202	0.0159102
					HTR5A	-3.16146	0.0159127
					PSMC1P10	-2.35818	0.0159441
					CEMP1	-4.06659	0.015963
					RP13-1032I1.10	-3.05762	0.0160254
					MTCO1P25	-2.3319	0.0161257
					IL21R	-2.27834	0.01622
					RP11-392E22.9	-1.6468	0.0162226
					PKHD1L1	-1.99387	0.0162435
					SLC6A19	-1.91294	0.0162714
					EEF1GP1	-2.52283	0.0162999
					TACR1	-2.71771	0.016329
					FTH1P8	-2.23938	0.0164138
					LETM1P2	-2.00576	0.0165067
					NUTF2P7	-3.00773	0.0165234
					RP13-93L13.2	-2.50687	0.0165262
					RASSF9	-1.79976	0.0165596
					GSTM5	-2.13676	0.0166093
					NLRP11	-1.91296	0.0166321
					CCDC168	-1.55328	0.0166859
					RPL10P5	-1.55328	0.0166859
					RPS29P6	-1.55328	0.0166859
					RP11-684B2.3	-1.55328	0.0166859
					MTCYBP4	-1.55328	0.0166859
					FBXW11P1	-1.55328	0.0166859
					RP11-481H12.1	-1.55328	0.0166859
					SNX19P2	-1.55328	0.0166859
					ATP1B4	-1.55328	0.0166859
					CTAGE14P	-1.55328	0.0166859
					RP11-447H19.4	-1.55328	0.0166859
					CYP3A4	-1.55328	0.0166859
					THAP12P1	-1.55328	0.0166859
					RP11-439L8.2	-1.55328	0.0166859
					TGM5	-1.55328	0.0166859
					RPL34P34	-1.55328	0.0166859
					MAGEB2	-1.95988	0.0169772
					RPL21P13	-3.05943	0.0170183
					KNG1	-2.17028	0.0172313
					SERPINE2	-1.50402	0.0172794
					C11orf16	-1.67885	0.0172903
					METTL21AP1	-1.5556	0.0172905
					PTCRA	-1.5556	0.0172905
					MTCO1P27	-1.5556	0.0172905
					OR7E117P	-1.5556	0.0172905
					ABHD17AP6	-1.5556	0.0172905
					RP1-34L19.1	-1.5556	0.0172905
					ALG3P1	-1.5556	0.0172905
					MARK2P8	-1.5556	0.0172905
					LLNLR-271C9.1	-1.5556	0.0172905
					MRPL40P1	-1.5556	0.0172905
					HSPE1P10	-1.5556	0.0172905
					RP11-401L13.4	-1.5556	0.0172905
					CCR3	-1.5556	0.0172905
					RP5-966M1.4	-1.5556	0.0172905
					UHRF2P1	-1.5556	0.0172905
					RPL7AP4	-1.5556	0.0172905
					SULT1E1	-1.5556	0.0172905
					SUMO4	-1.5556	0.0172905
					RP4-814D15.2	-1.5556	0.0172905
					COX20P2	-1.90433	0.0173675
					HNRNPRP1	-1.90433	0.0173675
					SERPINB6	-1.62948	0.0174747
					KCNV2	-2.12773	0.0175007
					IL20	-2.70326	0.0176086
					EIF1AXP1	-3.28053	0.0176387
					SCN3A	-2.02279	0.0176397
					PKD1L3	-2.02279	0.0176397
					SCN3B	-1.56317	0.0176628
					AL023806.1	-1.61786	0.0176875
					RP11-710M11.1	-2.52548	0.0177578
					RPL37AP1	-1.57248	0.0178096
					AC004076.7	-1.57248	0.0178096
					ADAP2	-1.82655	0.0178228
					PCDHGA9	-1.67111	0.0178862
					IQCF1	-1.87412	0.0178933
					KCNA2	-1.53753	0.0179298
					HAMP	-1.92623	0.0179428
					CLUHP6	-2.88453	0.0179771
					APOA2	-3.53324	0.0179938
					GPX2	-1.88216	0.0180215
					HHLA2	-2.23197	0.0181945
					ACRC	-1.6476	0.0183537
					ANXA13	-1.62239	0.0185556
					H2BFM	-1.58806	0.0185727
					MTRNR2L3	-1.64006	0.0185876
					CSH2	-2.40972	0.0186311
					FSCN1P1	-1.94505	0.0186618
					LY6G5C	-1.89838	0.0187035
					PLVAP	-2.08501	0.0187342
					ZBTB45P2	-2.6969	0.0188074
					RP11-203L2.3	-1.58328	0.0188603
					CRYAB	-2.20023	0.0188961
					PGAM1P5	-2.09353	0.0189068
					HSPD1P8	-2.41739	0.0189128
					ANKS1B	-1.70833	0.0189131
					USP41	-1.77076	0.0189217
					TRAC	-2.07278	0.0189461
					TUBBP6	-1.97861	0.0189914
					BCAS1	-2.03663	0.0189994
					LRRC46	-2.24908	0.0190178
					NLRP12	-1.91441	0.0190561
					ANKRD30A	-3.6716	0.0191837
					RP11-153M7.3	-1.76081	0.0192721
					SMKR1	-1.75518	0.0192868
					EIF5AL1	-1.79383	0.0193197
					RP11-815J4.5	-3.17488	0.0193232
					CTD-2369P2.12	-2.66622	0.0194068
					POLRMTP1	-2.18191	0.019416
					TLR7	-1.94426	0.0195536
					RP4-809F18.1	-1.83389	0.0195574
					FAM13C	-2.09071	0.0195648
					RP5-867C24.1	-1.58552	0.0196225
					RP11-1305N21.3	-2.173	0.0196642
					GIMAP4	-2.29739	0.0197053
					EBF2	-2.99617	0.0199611
					MED28P3	-2.44256	0.0200634
					HIST2H2AA3	-4.47597	0.0201055
					PIK3CG	-2.13239	0.0201657
					RP11-344H11.5	-4.20337	0.0203544
					SPDYE9P	-1.63407	0.02048
					RP11-87C12.2	-1.78096	0.0205115
					MEIG1	-2.0536	0.0206033
					ANKRD55	-2.22408	0.0206181
					DUXAP7	-1.90409	0.0206463
					HIST1H2BM	-2.03887	0.0206905
					RP11-547M24.1	-2.1077	0.0207309
					RPS3AP34	-2.10448	0.0207993
					GRP	-2.45828	0.020883
					ALOX5AP	-1.73895	0.0209479
					TTC6	-2.16917	0.0209511
					IL7R	-2.66631	0.0210271
					FAM184A	-1.72805	0.0210368
					CD177	-2.09273	0.0210376
					IGLV2-23	-2.65189	0.0212151
					CXorf65	-2.03874	0.021224
					MS4A7	-2.91205	0.0212313
					SLC7A7	-1.7119	0.021429
					ZP1	-1.8397	0.0214483
					TRPS1	-1.69298	0.0214594
					CTC-308K20.4	-2.10963	0.0215151
					ECM2	-2.50454	0.02161
					EEF1A1P36	-1.7303	0.0216371
					SUPT16HP1	-1.8902	0.0216809
					SPATA16	-1.8902	0.0216809
					LIPJ	-2.44111	0.0217155
					RP11-231C18.3	-2.70041	0.021726
					RP11-12A20.7	-2.0766	0.0218147
					HSH2D	-1.74931	0.0218255
					RP5-1158E12.2	-2.04954	0.0219466
					BTBD10P1	-2.21556	0.022004
					VCX	-1.63598	0.022031
					RP11-365F18.1	-1.79657	0.0220764
					GAPDHP2	-1.88629	0.0220814
					RPS4XP7	-3.9987	0.0221137
					CD226	-1.96259	0.0221536
					AIRE	-1.96244	0.0221757
					TDO2	-1.7568	0.0222824
					RP11-757C15.4	-1.7568	0.0222824
					RP11-775J23.2	-1.7568	0.0222824
					ACTG1P15	-1.7568	0.0222824
					RPS26P2	-1.7568	0.0222824
					RP4-765C7.2	-2.26106	0.0222941
					TSHZ1	-1.71315	0.0223279
					AC007256.5	-1.89319	0.0223706
					RS1	-1.781	0.0223755
					RP11-758G22.1	-1.98941	0.0223899
					IMPDH1P4	-3.48461	0.0224141
					HSPA8P15	-1.76634	0.0224962
					RP11-34P13.16	-2.13158	0.0225011
					CP	-2.5538	0.0225078
					GLOD5	-1.93092	0.0226622
					RP11-457K10.2	-2.07498	0.0228786
					ARRB1	-1.84401	0.0230627
					DNAJC12	-1.62131	0.0230957
					RPL21P75	-2.46081	0.023107
					NR0B1	-1.9321	0.0231379
					APOL3	-2.38535	0.0231621
					CSMD3	-1.65116	0.0231881
					FCRL3	-1.93392	0.0233145
					LRRC26	-1.80116	0.0233573
					UBBP2	-2.31042	0.0234995
					TEX13C	-1.75282	0.0236094
					TLE1P1	-2.15424	0.0236353
					RP11-561N12.1	-2.44152	0.0237818
					CTSS	-2.95346	0.0237846
					CTC-756D1.1	-1.85653	0.0237856
					SKINT1L	-2.1056	0.0239099
					CHCHD4P4	-2.21199	0.0239794
					IGLV7-46	-2.59094	0.0240037
					NPAP1	-1.84339	0.0240178
					CXorf36	-1.62107	0.0240462
					ITPR2	-1.72083	0.0240506
					NONOP2	-1.97729	0.0241158
					CTC-340A15.1	-1.58306	0.0241512
					RP11-681N23.1	-1.58306	0.0241512
					LDHAP5	-1.58306	0.0241512
					KRT8P31	-1.58306	0.0241512
					RP11-956J14.2	-1.58306	0.0241512
					HSPA8P11	-1.58306	0.0241512
					FRG2	-1.58306	0.0241512
					CRH	-1.58306	0.0241512
					AC073055.2	-1.58306	0.0241512
					C1GALT1P1	-2.12957	0.0242024
					RIMBP3B	-2.76934	0.0242394
					GJA4	-1.67209	0.0242511
					IHH	-2.89053	0.0242801
					RP11-110I1.5	-1.56655	0.0243267
					MYL6P5	-2.9375	0.0243356
					TMEM235	-1.80983	0.0243514
					RP11-574M7.2	-1.86093	0.0244252
					FLI1	-1.55674	0.0244275
					ANKRD20A8P	-2.25135	0.024456
					Z83313.1	-2.29626	0.024487
					VWA3B	-2.71389	0.0245596
					THEG	-1.79653	0.024617
					RERG	-2.31817	0.0246889
					AACSP1	-2.3023	0.0246976
					HNRNPA3P1	-1.6614	0.0248039
					MDS2	-1.80848	0.0250473
					NTS	-1.66475	0.0251017
					TMEM232	-1.98252	0.0251793
					OSGIN1	-1.71298	0.0252773
					LRRC37A5P	-1.66917	0.0253558
					VN1R48P	-1.55799	0.025375
					RP11-174N3.4	-2.04626	0.0253961
					AC010095.6	-2.36627	0.0255339
					RP11-716A19.3	-2.36627	0.0255339
					SAMD9L	-2.96292	0.025561
					ZNF578	-2.39976	0.0256313
					NCR1	-2.98248	0.0256747
					RP11-144C15.1	-2.13675	0.0256977
					CTD-3105H18.18	-1.73685	0.0258381
					TLL1	-2.22937	0.0259399
					MAN1A2P1	-1.95768	0.0260464
					CD209	-1.55928	0.0260602
					PRR26	-1.94833	0.026062
					RP11-542C16.2	-4.11841	0.0261532
					GPR34	-2.75152	0.0263033
					RNF5P1	-3.47668	0.0263202
					CST4	-2.08033	0.0265156
					PQLC2L	-1.72795	0.0267364
					C9orf47	-2.30486	0.0267618
					NKX6-3	-1.78517	0.0267722
					CLEC2B	-2.31838	0.0268045
					SULT1C2P1	-1.65427	0.0269301
					RLN1	-1.56579	0.0269564
					DACT2	-1.7455	0.0269759
					RP11-1070B7.2	-3.25361	0.0270479
					CFP	-1.57607	0.0271199
					RP4-682C21.2	-2.06095	0.0272494
					SMIM2	-1.76306	0.0272794
					OMD	-2.91358	0.0274316
					GBP1P1	-1.90245	0.0274628
					SLAMF7	-2.78663	0.0276039
					CBX3P4	-1.85932	0.0279466
					GRM7	-2.22906	0.0280485
					PPIAL4G	-1.66676	0.0282011
					CTD-2124B8.2	-2.18649	0.028317
					DNM1P47	-1.58352	0.0283479
					SLC18A1	-1.86337	0.0283772
					CETN4P	-1.74231	0.0285312
					DPH3P1	-3.49749	0.028556
					LHX9	-1.97585	0.028566
					LCE1D	-3.79628	0.0285733
					TNR	-1.51262	0.028591
					GAPDHP61	-2.10959	0.0287643
					CDRT15P1	-1.68594	0.0287726
					CTRC	-1.71269	0.0287929
					WASF4P	-1.62355	0.0287968
					RRM2P3	-1.80206	0.0288136
					SHH	-3.25436	0.0289596
					EMCN	-1.71155	0.0289948
					TNFSF10	-2.26974	0.0290735
					SLC15A1	-1.66497	0.0291219
					PGM5P2	-1.87373	0.0291432
					SERPINB4	-1.72776	0.0292595
					GJD4	-1.68221	0.0293248
					RP11-506H20.2	-2.16716	0.0293591
					SPACA4	-1.87948	0.0294269
					RIT2	-1.7375	0.0296825
					RUNX3	-1.76774	0.0297987
					F8A3	-2.8697	0.0298837
					JAKMIP1	-1.6242	0.0301756
					DPY19L1P2	-2.23325	0.0302463
					RP11-265D19.6	-2.11976	0.0302656
					TMEM63A	-1.56303	0.0305073
					GRK6P1	-2.05114	0.0305172
					HCG27	-1.53945	0.0305459
					HBA2	-1.94245	0.0306522
					BRINP3	-2.09396	0.0306736
					NUDT18	-1.56267	0.030677
					AL589743.1	-2.11339	0.0307145
					CT45A1	-2.07043	0.0307298
					SPP2	-2.01833	0.0307582
					HNF1B	-2.45946	0.0308871
					S100Z	-1.50217	0.0308901
					APOC4-APOC2	-2.00893	0.0309175
					PSMC1P1	-3.40531	0.0309338
					SYCP3	-1.95826	0.030936
					IGHM	-2.68077	0.0312187
					C1orf64	-1.68314	0.0312806
					RP11-122L4.2	-1.6078	0.0315657
					GPR83	-1.61353	0.0316753
					GCM1	-1.51964	0.0316786
					RP11-305M3.2	-2.76286	0.0317029
					FIBIN	-1.72898	0.0317104
					RPL36AP53	-2.55692	0.0318428
					CTSLP2	-1.53843	0.0318668
					LRRC66	-1.82552	0.0318926
					EBF1	-2.14554	0.0319956
					EVI2A	-2.85065	0.0320373
					RP11-697E2.7	-1.94163	0.0321071
					GTF2H2C_2	-2.46256	0.0321329
					IL2RG	-1.76564	0.0321498
					RFPL2	-2.95255	0.032188
					IL5RA	-2.24725	0.0322034
					PCDHB1	-2.08114	0.0323332
					GMPR	-1.90921	0.0323884
					RPL9	-1.61536	0.0324988
					PADI4	-1.65937	0.0326866
					BHLHE22	-2.34846	0.0326973
					NPPB	-2.82511	0.0330243
					ADAM20P1	-1.87336	0.0330888
					TFCP2L1	-1.52378	0.0332279
					NDUFB4P11	-1.74163	0.0332295
					RP11-40A7.2	-1.79314	0.0333385
					RNASE6	-2.04652	0.0333793
					LRRC37A	-1.80709	0.0334448
					CDHR4	-1.59047	0.0334818
					HPX	-2.28429	0.0335292
					LYG1	-1.53801	0.0335398
					YWHAEP5	-1.82206	0.0335748
					NKX3-2	-2.62444	0.0338337
					GYPB	-3.01447	0.0338641
					GOLGA6L7P	-1.86341	0.0339093
					AL356053.1	-1.86319	0.0340164
					SCGB3A1	-1.77106	0.0340782
					IGKV3D-11	-1.86404	0.0342447
					LAMP3	-2.00527	0.0342881
					RP1-217P22.2	-1.78399	0.034464
					AXDND1	-1.63437	0.0347501
					PPIAP9	-1.61996	0.0348924
					LUZP6	-2.14815	0.0349003
					HSPA8P5	-2.12397	0.0350565
					ADCY10	-2.1127	0.0351641
					LHX1	-2.24674	0.0351809
					OR5H8	-1.5006	0.035181
					HNRNPA1P14	-1.5006	0.035181
					SH3GL1P3	-1.67569	0.0353071
					RPS4XP5	-1.92874	0.0354934
					GRAMD4P8	-2.00087	0.0356
					RP11-307N16.6	-2.00087	0.0356
					ADGRG7	-2.38535	0.0356163
					RANP5	-2.59613	0.0356194
					TBR1	-1.64096	0.0357756
					PTGER3	-1.6444	0.0360276
					RP11-159H3.1	-3.49142	0.0362388
					ISX	-2.50989	0.0363013
					IGIP	-2.08227	0.0363257
					RP3-417G15.1	-2.63891	0.0363503
					NBEAP1	-1.51419	0.0364896
					RPS7P14	-1.51419	0.0364896
					CCDC83	-1.51419	0.0364896
					CAPN8	-1.74764	0.036622
					LY86	-1.88975	0.0367341
					ATP8A2P1	-3.10313	0.0370077
					CD34	-1.98593	0.037138
					GUCY2F	-1.90378	0.0372153
					KRT16P2	-1.76914	0.0372719
					MED28P7	-1.94961	0.0373181
					RP11-124D2.7	-1.70456	0.0373359
					RPL12P4	-2.57099	0.0373538
					TMEM56-RWDD3	-1.65234	0.0373848
					MYOG	-1.89891	0.0374582
					MROH7	-1.87727	0.0374693
					AC104389.32	-2.71388	0.0375037
					ACTG1P14	-1.62569	0.0375526
					XXbac-B562F10.11	-1.92668	0.0376232
					RP11-345K20.2	-1.50681	0.0377261
					CTB-158E9.2	-2.36287	0.0377316
					VN1R53P	-1.8226	0.0378645
					RPL19P14	-4.56765	0.0379909
					PECAM1	-1.57456	0.0382201
					TUBBP5	-1.64676	0.0382572
					ACTG1P23	-1.50877	0.0384886
					RP11-345I18.4	-1.50877	0.0384886
					CTD-2370N5.3	-1.85175	0.038552
					ITGB2	-1.62331	0.0385777
					RP13-210D15.8	-1.82527	0.038609
					RP11-360K13.2	-1.82527	0.038609
					LGI3	-2.13786	0.0388436
					RPL39P34	-2.38663	0.038865
					GRIN3A	-1.96293	0.0389919
					CTB-147C22.3	-1.58816	0.0390122
					RGS8	-1.80101	0.0392863
					RP5-1056L3.3	-1.79114	0.0393052
					RPS15AP6	-1.57336	0.0394331
					RP11-466F5.6	-1.63942	0.039516
					SPATA45	-1.64216	0.039615
					CORT	-1.99603	0.0396582
					FFAR2	-1.86853	0.0396711
					OR10A3	-1.74434	0.0397353
					SULT1B1	-2.02946	0.0400724
					TNFRSF13B	-2.08932	0.0403315
					RP11-403I13.10	-1.74633	0.0403332
					RPS15AP10	-1.74633	0.0403332
					CCL8	-1.74633	0.0403332
					RP11-468E2.6	-1.74633	0.0403332
					SYTL4	-1.59176	0.0404285
					C11orf86	-1.53083	0.040529
					SPDYE2	-2.00247	0.0406189
					PRLR	-1.60601	0.04069
					CLNK	-1.5913	0.040899
					RP11-570L14.1	-1.51451	0.0410617
					PDK4	-1.61809	0.0412551
					POLD2P1	-2.74724	0.0413069
					RPL23AP84	-2.74724	0.0413069
					LRFN5	-1.78724	0.0413252
					SH2D1A	-1.51513	0.0414432
					HIST1H2BO	-1.81125	0.0415035
					OR1F1	-1.62907	0.0419577
					CTC-458A3.1	-2.84582	0.0420534
					STK31	-1.58184	0.0422529
					IFI27	-2.54665	0.0423405
					RP13-1056D16.2	-2.40762	0.0424524
					RPL5P23	-1.6512	0.0426838
					CYP21A1P	-1.69198	0.0430187
					CCL19	-1.65041	0.0430205
					IGHA2	-2.53237	0.043055
					B3GAT3P1	-2.22568	0.0430575
					RP11-132A1.6	-1.63621	0.0431186
					PF4V1	-1.65239	0.0431381
					CTD-2643K12.1	-3.17822	0.0432448
					ALOX15B	-2.24075	0.0433106
					AC006987.5	-1.65152	0.0433965
					RP1-179N16.3	-1.65152	0.0433965
					SLC12A3	-1.65152	0.0433965
					SLC47A1P1	-1.65152	0.0433965
					CD33	-1.59659	0.0434229
					DIO2	-1.63466	0.0434468
					ST6GALNAC2	-1.53836	0.0437876
					AL513523.1	-1.69827	0.0438213
					AL513523.2	-1.69827	0.0438213
					NCF1C	-1.86971	0.0439039
					OTOS	-1.64277	0.0439494
					PLCXD3	-2.55798	0.0440611
					FAM163A	-2.1943	0.0441981
					ST8SIA4	-2.03301	0.0442592
					FAM26E	-1.57113	0.0443764
					KCNQ5	-1.64227	0.0444188
					EXOC3L4	-1.99598	0.0445429
					C9orf152	-2.41035	0.0446195
					PTMAP8	-2.35528	0.0449552
					INHBA	-1.51742	0.0449878
					RP11-1016B18.1	-1.58459	0.0450033
					NPPA	-2.03305	0.0450122
					RP11-64B16.2	-1.73938	0.0450153
					AC060834.2	-1.73938	0.0450153
					SPI1	-1.51491	0.0451532
					RP11-311P8.2	-1.97901	0.0452343
					TAS2R14	-1.89687	0.0453017
					SPATA2P1	-1.52107	0.0456374
					RPS2P48	-1.52107	0.0456374
					SIK1	-2.24547	0.0457426
					SPARCL1	-1.58425	0.0457968
					PMP22	-1.51968	0.0458036
					RP11-1070B7.1	-2.16233	0.0459294
					PRDM13	-1.6654	0.0460105
					VSTM2A	-2.43193	0.0460426
					EIF4A1P2	-1.56882	0.0467116
					RP11-1035H13.3	-2.05099	0.0470767
					FOXF2	-2.83924	0.0473568
					HTN1	-1.5625	0.0475639
					MNDA	-1.88834	0.0476274
					RP11-777B9.5	-4.27902	0.0478942
					RPL30P2	-1.83399	0.0479689
					FCRL1	-1.69825	0.048168
					IGKV1-9	-2.2256	0.0484057
					CACNA1D	-1.71145	0.048547
					RP11-455G16.1	-2.74892	0.0486928
					FXYD3	-2.22801	0.0487323
					WISP3	-1.591	0.0488039
					CLEC5A	-1.73055	0.0490497
					IGHGP	-1.73055	0.0490497
					CCL18	-1.89433	0.0492515
					PRSS41	-1.53284	0.0493467
					KLK12	-1.53284	0.0493467
					URGCP-MRPS24	-1.53284	0.0493467
					RP11-572M11.2	-2.18492	0.0494502
					CT45A10	-3.07871	0.0494882
					MYO1A	-2.22671	0.0496423
					RBM44	-1.97732	0.0498205
					RP11-486O13.5	-2.02516	0.0498537

## Sheet: vs AMIQ hESC-iMEF-CM
	gene_symbol	logFC	P.Value		gene_symbol	logFC	P.Value
	TGFBI	5.96014	8.07015e-11		TRDN	-5.5621	5.28937e-08
	IGF2	6.46339	7.96618e-10		PKIB	-3.81034	5.59573e-08
	IGFBP5	5.34131	4.34257e-09		SLC25A3P1	-5.07986	5.47364e-07
	COL17A1	5.85808	5.08115e-09		AC104131.1	-6.86939	1.18232e-06
	LHX5	6.93207	7.15676e-09		UBBP4	-3.52715	1.64955e-06
	GREB1L	7.19657	1.99281e-08		GDA	-4.39216	2.08611e-06
	KRT14	7.69494	3.92717e-08		RPS6P12	-4.75907	2.41302e-06
	KRT17	6.25735	7.92815e-08		FAAH2	-2.92457	3.05598e-06
	FN1	4.62479	1.46428e-07		PCDHB5	-3.18197	3.59226e-06
	KRT5	7.40564	1.53095e-07		MPP1	-2.84516	4.70668e-06
	IGFBP3	3.88147	1.73754e-07		AC110615.1	-6.61898	5.6378e-06
	TIMP3	4.75105	1.83e-07		TCEAL5	-3.79692	6.25299e-06
	COL3A1	7.22345	2.68638e-07		BEX5	-3.163	7.22652e-06
	TNC	3.88137	3.48492e-07		PRSS21	-4.26686	8.94385e-06
	TRIM29	5.40748	4.68041e-07		AC010970.2	-2.22875	9.63102e-06
	OLIG3	6.34557	5.13169e-07		CSAG2	-5.64075	1.8324e-05
	VTCN1	5.80485	5.73e-07		CLRN1	-4.57523	1.86216e-05
	SIX3	5.89721	6.8467e-07		CTD-2510F5.6	-5.65252	1.98206e-05
	COL5A1	4.30972	7.34971e-07		CR1L	-3.28386	2.31682e-05
	ANXA8	4.85455	7.97185e-07		CPO	-5.18254	2.54911e-05
	CDSN	7.43714	1.27737e-06		RASAL3	-3.0113	3.77355e-05
	KANK4	4.9366	1.29954e-06		ERAS	-4.74538	3.91353e-05
	TGM2	3.75699	1.80826e-06		MAGEB17	-4.40329	4.00876e-05
	SNAI2	3.92764	1.98585e-06		RNASE1	-3.90436	4.01593e-05
	LTBP2	3.82676	1.98827e-06		MAGEA2	-3.29246	4.65833e-05
	CERCAM	3.34446	2.07571e-06		LINC01057	-3.08553	4.86696e-05
	FEZF1	5.62529	2.16865e-06		TNFSF9	-3.77606	5.31908e-05
	C8orf4	4.9565	2.32342e-06		AC016577.1	-3.40941	5.8019e-05
	TNNT3	5.59223	2.57143e-06		WDR72	-2.5086	6.06669e-05
	MUC16	4.96754	2.69906e-06		ACOT11	-1.89911	8.88522e-05
	NR2F2	6.26501	2.70127e-06		HLA-DMB	-3.02192	9.09108e-05
	CCDC80	2.30246	2.86529e-06		DPPA2	-2.46678	9.13673e-05
	PKDCC	2.94593	2.94695e-06		CT45A10	-5.43908	9.18209e-05
	WNT5A	4.0788	3.32305e-06		RAB17	-3.55118	9.49234e-05
	PAPPA	4.31361	3.39104e-06		TCL1A	-3.08724	9.88941e-05
	AC027682.1	6.75047	3.66796e-06		CFP	-2.77718	0.000102098
	LRRTM1	4.68945	3.79803e-06		HPGD	-2.5076	0.000114123
	FBN2	2.61709	3.96589e-06		RBM46	-3.91763	0.000114318
	KRT6A	7.72974	3.99691e-06		VAV1	-2.35202	0.000125275
	CYP26A1	3.12544	4.72028e-06		TMEM200B	-2.01059	0.000129089
	ITGB6	6.56226	4.7869e-06		CBR1	-1.76004	0.000131776
	DLK1	5.09314	5.161e-06		AC007326.1	-2.70023	0.000135835
	WNT6	6.34182	5.31369e-06		TCEAL2	-2.18891	0.000138966
	NRP2	2.10824	6.21794e-06		ARSE	-2.07316	0.000150127
	SFRP1	2.68365	7.24673e-06		SMIM11A	-3.40431	0.000152335
	MN1	3.00387	7.4263e-06		BHMT2	-3.14483	0.000166583
	COL1A2	3.30112	8.1874e-06		RAB20	-1.73352	0.000170061
	HAND1	5.25247	8.57881e-06		MDGA2	-2.91307	0.000195763
	ZNF503	5.19869	8.58947e-06		TSPAN7	-1.91463	0.000196018
	ACKR3	3.14338	9.17078e-06		OGFRL1	-2.21616	0.000197768
	KRT16	5.10075	9.63384e-06		SLITRK4	-2.19813	0.000199736
	LIX1	5.28801	9.69406e-06		NEURL1	-3.59981	0.000200273
	NAV1	2.16143	1.03279e-05		MAPK11	-2.40164	0.000210488
	CDH11	2.68439	1.04397e-05		HBA2	-3.47001	0.000224381
	ANXA8L1	3.79751	1.11049e-05		IFIT2	-2.17784	0.000228107
	ADAM12	5.31	1.12005e-05		ACOT9	-1.64533	0.000228761
	ZNF521	3.25636	1.2989e-05		GPR143	-1.73649	0.000234711
	AHNAK	2.18032	1.35841e-05		MOSPD1	-1.73799	0.000237413
	MSLN	6.38973	1.51337e-05		ZNF600	-2.66802	0.00024028
	PLSCR5	5.62937	1.55879e-05		ICA1L	-2.40141	0.000243862
	C1orf21	1.91958	1.6243e-05		KDM6A	-1.51979	0.000285882
	ECM1	3.84367	1.69151e-05		NPY1R	-2.44795	0.00031389
	GAS1	3.5759	1.72627e-05		UAP1L1	-2.04898	0.000345228
	TGFB2	4.17181	1.74929e-05		ZNF525	-2.1952	0.000346253
	SOX21	4.21439	1.80612e-05		TUBB8P7	-2.53244	0.000367548
	PAX6	5.14931	1.80915e-05		CAPRIN2	-2.10486	0.000430847
	GLI3	2.46776	1.90478e-05		TCEAL9	-1.59114	0.000442884
	LRRC17	4.3645	1.91811e-05		CSH2	-4.14405	0.000443034
	ZIC1	4.69522	1.95985e-05		SMS	-1.53671	0.000447249
	NPTX1	4.2994	2.03946e-05		DPEP3	-2.09538	0.000450582
	PTHLH	4.80992	2.04694e-05		ZNF114	-1.64928	0.000455816
	EFNB2	2.24571	2.26082e-05		BEX1	-1.54561	0.000456977
	FRZB	2.76648	2.26892e-05		DNMT3L	-2.70277	0.000507668
	RAX	5.10447	2.30232e-05		SHROOM4	-2.12619	0.000565119
	PRTG	4.32313	2.42063e-05		TMC8	-3.0615	0.000572117
	FBN1	3.7799	2.46118e-05		PCSK9	-2.19448	0.000576052
	OSR1	4.69664	2.50976e-05		HERC5	-1.89614	0.000576925
	ZEB2	3.49244	2.55892e-05		GAB3	-2.5543	0.000598967
	OTX2	2.68309	2.80387e-05		ZNF204P	-2.04533	0.00060114
	PALLD	2.02826	3.03388e-05		BCAN	-1.99721	0.000618083
	SMOC1	3.46168	3.29463e-05		PF4	-3.66875	0.000624691
	IRX1	5.25655	3.68787e-05		MT1F	-2.47445	0.000625317
	FAM198B	3.6539	3.75894e-05		MTRNR2L6	-1.66702	0.000646434
	ZIC5	2.31265	3.9349e-05		C4orf51	-3.29525	0.000648633
	PCDH7	2.7976	3.94454e-05		TESPA1	-2.20182	0.000649104
	FZD2	3.08911	4.01956e-05		CLN8	-2.3796	0.000670653
	LAMB3	3.3148	4.15154e-05		PLLP	-2.48591	0.000673311
	EPHA4	3.27461	4.2336e-05		MTRNR2L1	-1.93122	0.000714979
	FST	2.47552	4.23749e-05		SERPINB9	-1.83389	0.000739353
	PKP1	2.84893	4.33407e-05		LLNLF-173C4.2	-5.4578	0.000747642
	TBX18	4.964	4.42234e-05		SLC25A43	-1.73235	0.000752302
	GBP2	3.39718	4.43979e-05		CCDC172	-2.16043	0.000755506
	UGT1A6	5.09436	4.52639e-05		RGN	-2.92756	0.00076953
	LEF1	3.93861	4.7271e-05		CLC	-4.43469	0.000781069
	WLS	5.38379	4.78836e-05		CSH1	-3.52292	0.000814745
	PKNOX2	3.1013	4.79771e-05		UGT3A1	-2.07309	0.000823464
	LRP2	2.90664	4.93867e-05		CD70	-3.67676	0.000831374
	SLC16A9	2.56353	5.15214e-05		AASS	-1.97196	0.000833762
	FAP	4.97531	5.2406e-05		HLA-F	-2.09239	0.000843974
	FOXB1	3.41208	5.50419e-05		MX1	-1.60956	0.000861929
	C6orf141	3.84021	5.5169e-05		CASP10	-1.65287	0.000864282
	CST6	2.98355	5.52839e-05		SAPCD2	-1.55195	0.000865802
	EPGN	5.55797	5.54015e-05		PON3	-3.63205	0.000878197
	NOG	4.152	5.6271e-05		C4BPB	-2.45386	0.000880177
	CUZD1	4.89172	5.71318e-05		ZNF121	-1.74494	0.000913136
	ENC1	2.51094	6.57112e-05		SPR	-1.73726	0.00091651
	PTGES	2.2429	6.62249e-05		ETV4	-1.8424	0.000944338
	SOX1	5.2828	6.79515e-05		TCF15	-2.08037	0.000952271
	ZFHX4	3.18419	7.04451e-05		ACHE	-1.96605	0.000962382
	VIM	1.97596	7.13695e-05		KANK3	-2.3114	0.00097808
	LAMA3	3.31224	7.45431e-05		HHLA1	-2.11669	0.000990786
	FEZF2	4.11356	7.56401e-05		RP11-686D22.7	-2.16475	0.00100537
	FBLN7	3.59833	7.94447e-05		NAP1L6	-1.80024	0.00100762
	WNT10A	5.28195	8.36139e-05		EDNRB	-2.11991	0.00102983
	KLHL14	3.5188	8.65094e-05		KCNS3	-1.7488	0.00113405
	HSPG2	2.15758	9.23249e-05		IQSEC2	-1.62451	0.00114437
	SLIT3	2.71311	9.35732e-05		IL23A	-2.56845	0.00116859
	CLIC3	3.68469	0.000100564		CCDC129	-2.90206	0.00117255
	BLNK	4.86441	0.000107111		CYCSP45	-3.56779	0.00118949
	CYP26B1	4.16864	0.000110197		RASL10A	-2.96281	0.00122157
	SP8	2.97729	0.000111294		ITLN2	-2.10372	0.00122405
	FILIP1L	3.7426	0.000114406		MORC4	-1.69594	0.00123201
	ZNF423	1.66123	0.000118948		CD79B	-2.69652	0.00123656
	HMGA2	1.75913	0.000118972		PHKA1	-1.52487	0.00126477
	RSPO3	4.25044	0.000122487		FLVCR1	-1.72728	0.00127013
	POU3F4	5.56905	0.000123362		PIFO	-1.52728	0.00127018
	ADGRG1	2.47275	0.000123939		ITM2A	-1.99492	0.0012963
	PLAGL1	3.23601	0.000127918		APOOL	-1.70481	0.00133879
	PHC2	2.46691	0.000128288		GBP4	-2.07371	0.00134525
	PRSS23	2.07351	0.000128916		HBE1	-4.22205	0.00135492
	PLEKHB1	2.066	0.000129356		LLNLF-176F2.1	-2.73133	0.00137165
	CCDC177	3.15184	0.000130083		CNR1	-2.38652	0.00137543
	LY6D	5.03508	0.000140464		KLF18	-3.39209	0.00141743
	TRPM3	2.49946	0.000140667		NRSN1	-5.48559	0.00142028
	PTGS2	4.24621	0.0001407		SH2D3C	-1.86109	0.00142804
	GDPD2	1.88623	0.000141842		GTF2H2C_2	-2.9265	0.00145472
	DAPP1	4.33325	0.000141973		CDX4	-3.04626	0.0014727
	MFAP5	2.41621	0.000142965		SPOCK3	-2.81337	0.00149202
	BMP1	2.19783	0.000144866		TUBE1	-1.53592	0.00149971
	FEZ1	2.09838	0.000145006		RASIP1	-1.74267	0.00150088
	ZBED2	4.85459	0.000146846		NECAB1	-1.55271	0.0015228
	ERP27	4.63593	0.000148295		MGAT4A	-2.45251	0.00153407
	LAMC2	2.02917	0.000152288		BBS9	-1.96139	0.00153663
	TNFAIP3	2.2071	0.000153236		PDCL3P4	-3.24624	0.00154212
	SEMA3C	3.13018	0.000166335		RP11-686D22.3	-2.17268	0.00155554
	SALL1	1.67346	0.000171035		DEC1	-2.56876	0.00158301
	CLSTN2	2.74879	0.000174522		IZUMO2	-2.16441	0.00162028
	DSC3	2.19619	0.000176466		CRLF1	-2.17203	0.00163994
	MEIS2	4.76385	0.000177237		RENBP	-1.90103	0.00165146
	FZD8	2.12887	0.000182619		PPP2R2C	-1.90125	0.0016733
	ATP1A2	1.89449	0.000185913		CBR3	-2.00555	0.00172525
	ZIC2	2.31996	0.000192481		DLL3	-1.98242	0.00175139
	PCDHGA10	2.27548	0.000194334		RAB39B	-1.57284	0.0017682
	LMO1	4.17597	0.000197034		IAH1	-1.52524	0.00183216
	LOXL2	1.88995	0.000197514		GOLGA4	-1.60447	0.00184445
	NYNRIN	1.60736	0.00019987		BSND	-2.76171	0.00187092
	NT5E	3.13828	0.000201921		SYP	-1.61629	0.0018714
	SOX9	2.33335	0.000202568		DUSP9	-1.76903	0.00191141
	CCDC92	3.03239	0.000209229		SLC15A1	-2.39951	0.00191603
	BMP2	3.1875	0.000214019		MYH2	-2.47473	0.00192067
	MXRA5	2.69195	0.000217069		PABPC5	-2.18496	0.00195172
	LGALS3BP	1.90452	0.000218605		AMN	-2.68161	0.00195677
	HK2	1.9403	0.000218776		CDR1	-2.66881	0.00198398
	ADAMTS9	2.63553	0.000220837		H2BFM	-2.68556	0.00202493
	ACKR2	3.56166	0.00023136		RNF2P1	-1.90915	0.00204363
	OTX1	3.56351	0.000234186		MTRNR2L8	-1.51607	0.00210752
	HSPB7	3.91345	0.000238262		GBGT1	-1.60575	0.00211465
	LMX1A	5.28653	0.00024214		PDZD4	-2.0704	0.00213138
	CRB2	2.43773	0.000255159		AL161905.1	-3.23643	0.00218901
	GATA3	3.06232	0.000259217		PABPC1L2B	-3.33584	0.00220065
	PTPRT	3.66535	0.000265788		TBC1D8B	-1.81744	0.00223235
	TNFRSF19	3.58583	0.000265923		TM6SF1	-2.78736	0.0022472
	RTL1	4.2216	0.00026691		ZNF165	-1.99619	0.00225536
	S100A6	2.08932	0.000267326		SLCO4A1	-1.90869	0.00233376
	S100A14	2.59176	0.000270212		GAL	-2.18247	0.00237829
	TNS3	1.81179	0.000276349		GDF3	-1.7722	0.00238831
	SLC2A1	2.02654	0.000277777		MT1G	-1.95002	0.00240024
	AQP1	4.25552	0.000278645		MUC5B	-2.67419	0.00240143
	C1orf226	1.88337	0.000291977		CD7	-2.41535	0.00244506
	RAB4B-EGLN2	4.545	0.000295993		ENTPD2	-2.25126	0.00246433
	BAHCC1	3.27113	0.000299882		OR2A20P	-2.03416	0.0024671
	CYP26C1	3.62484	0.00030247		MBP	-1.67611	0.0024704
	MMP1	5.68093	0.000321826		MEFV	-2.85309	0.0024836
	FHOD3	2.04231	0.000331638		STAC3	-2.2357	0.00248474
	HES3	3.05273	0.000341329		EDA2R	-1.5569	0.00249074
	FGF11	1.74314	0.000352085		SYT5	-2.21577	0.00250458
	P3H2	1.69853	0.000362833		HCLS1	-1.96657	0.00253923
	SLCO2A1	2.56132	0.000370405		GRPR	-1.9561	0.00258409
	AGR2	5.76755	0.000370727		NPW	-1.81134	0.00260619
	EMP1	3.49509	0.000377831		TRIB3	-1.76138	0.0026157
	PSG5	3.38154	0.000390522		TMOD2	-1.89445	0.00262361
	SEMA5A	1.92064	0.000407654		ZNF674	-1.55309	0.00263899
	WSCD2	2.5913	0.000410373		C9orf135	-1.85048	0.00267412
	PAPLN	2.4721	0.00041338		RHEBL1	-1.78149	0.00274254
	MOXD1	2.21877	0.000415772		DTWD2	-1.75103	0.00284248
	NNAT	2.08013	0.000417351		MAGEB1	-2.83933	0.00289414
	GALNT5	2.78041	0.000421427		NPM2	-2.65085	0.00302436
	LOX	2.38599	0.000421809		PRSS3	-2.54794	0.0030255
	BOC	2.77597	0.000423336		AF111168.1	-2.10868	0.00305648
	GABRA2	4.71767	0.000425139		CCNA1	-1.94314	0.00311847
	LGI1	4.64855	0.000444791		RIT2	-2.98236	0.00315259
	MYOF	1.69071	0.000447002		MTND1P23	-2.61029	0.00316332
	ITGBL1	3.05259	0.000453613		NCMAP	-2.48751	0.00317944
	IER3	1.65532	0.000459607		SLC16A7	-2.09885	0.00321161
	FLRT3	3.40242	0.000464138		USH2A	-2.96298	0.00323281
	CDKN2B	3.69798	0.000465903		RAPGEF3	-1.61434	0.00324816
	NKD1	1.86322	0.000469155		TMEM229B	-2.24778	0.00327363
	THBS3	2.005	0.000477769		PARP15	-2.97565	0.00328172
	TRPC4	2.60604	0.00048225		HLA-DRA	-2.09596	0.00333572
	COPZ2	2.9242	0.000486278		TRPC6	-1.958	0.0034857
	EGFR	2.05576	0.000487815		LRFN5	-1.92692	0.00348828
	COL4A6	1.60343	0.000491695		OVCH2	-2.41327	0.00351842
	CNTN4	4.22004	0.000504161		SCARF1	-1.8502	0.00354767
	TRIL	2.14977	0.000512929		SOX18	-2.78582	0.0036051
	FIGNL2	2.0821	0.00051446		NPHP3-ACAD11	-3.02953	0.00363384
	PCDHGC4	2.64608	0.000518958		TCEAL6	-3.27273	0.00371307
	LRIG1	1.6095	0.000523841		ABCC9	-1.92316	0.00373061
	AHDC1	1.61018	0.000540487		IL6R	-1.82643	0.00373822
	GLIS3	3.31264	0.000543644		PABPC1L2A	-2.01599	0.00374964
	CRISPLD2	2.47552	0.000548657		NANOG	-1.9555	0.00385976
	TNRC18	2.01917	0.000581189		HRG	-2.66246	0.00390748
	FOXP4	2.19126	0.000604997		RP11-231P20.2	-2.68985	0.00390789
	FBXO10	1.56379	0.000606136		MAFA	-2.15849	0.00400631
	SPTBN2	1.59452	0.000607535		FADS6	-2.08028	0.00402514
	GREM1	2.91242	0.000617723		DDIT3	-1.86166	0.00413457
	MYLK	1.59952	0.000623613		DYX1C1	-1.54839	0.00415268
	TFAP2A	4.56703	0.000653542		ERVFRD-1	-3.2833	0.00416115
	CTNND2	1.88899	0.00066124		ARRB1	-2.23021	0.00422745
	EPAS1	2.45673	0.000666929		KIAA0226L	-1.6811	0.00427545
	CITED2	2.31018	0.000677095		KLHL34	-2.0373	0.00442323
	SMOC2	2.65936	0.000678651		REEP1	-2.06571	0.00446412
	CDKN2A	2.6826	0.000683357		ZNF578	-2.63247	0.00457818
	SCUBE3	2.25781	0.000694503		SCARA5	-2.48861	0.00464398
	GUCA1A	1.64716	0.000709966		TTC39C	-1.6194	0.00475252
	PCDHGB7	2.18555	0.000735317		MARCH11	-2.45541	0.00477918
	C5orf46	3.22406	0.000745077		MATN4	-2.09307	0.0048081
	RSPO2	4.36119	0.000751379		CHST1	-2.22056	0.00482081
	HTRA3	2.42696	0.000752365		NRK	-2.35787	0.00482874
	SLC44A2	1.9763	0.000753225		KIF12	-1.81263	0.00488569
	CHI3L2	3.21388	0.000755756		FTCD	-2.06014	0.00488615
	SP5	4.18233	0.000771347		TFCP2L1	-1.91127	0.00489226
	MOV10	1.59321	0.000796937		S1PR5	-1.87489	0.00490952
	POU3F2	3.25532	0.000797144		NTN4	-1.67896	0.00493159
	PRKCA	1.59715	0.000826205		SLC38A4	-1.78774	0.00496684
	GNRHR2P1	4.37389	0.000838755		LRRC69	-2.43887	0.00500729
	PYGM	1.65762	0.000846043		C12orf50	-1.86955	0.00503804
	NPR3	3.41047	0.000861124		PKD1L2	-1.53582	0.00509569
	ANKRD1	2.61946	0.000869344		TRAPPC3L	-2.00714	0.00513294
	SLITRK6	4.10157	0.000879734		GRAMD4P3	-2.92274	0.00518968
	RHOBTB3	1.86496	0.00088474		ADCY8	-1.60911	0.00523119
	CNTNAP2	1.55456	0.000885715		TCF24	-2.06402	0.00529048
	LOXL1	1.76385	0.000900389		ACRC	-2.41682	0.00532762
	BCKDHA	1.91086	0.000912721		UTF1	-2.34462	0.00540187
	CPXM2	1.62106	0.000923769		CSAG3	-2.4663	0.00541109
	KRT7	2.33216	0.000942523		FRMPD4	-2.7667	0.00542101
	RP11-140L24.4	4.01455	0.000996275		GABRD	-1.93715	0.00551538
	KDM6B	1.88308	0.00101169		GH1	-2.93555	0.00560014
	NR2F1	4.79021	0.00101275		CALB1	-1.68293	0.00569014
	ATP9A	1.65575	0.0010381		ZNF808	-1.50984	0.00575246
	VWF	2.89207	0.00104002		ZFHX3	-1.74873	0.00583149
	LGR5	3.56784	0.00105351		CXCR2	-2.91157	0.00583834
	TRIM55	3.42068	0.00106799		LHFPL1	-1.91307	0.0058456
	TCAF1P1	2.83738	0.00109171		IL20RB	-1.60937	0.00585466
	ACP2	1.64657	0.00109591		PCP4L1	-1.81752	0.00588098
	SEZ6	2.33602	0.00112011		CEMP1	-4.33076	0.00592518
	GAS6	1.54873	0.00112275		SCARF2	-1.57314	0.00603068
	CSF1R	2.64431	0.00113057		TNFAIP6	-2.6555	0.0060591
	LRRC4	2.33041	0.00113216		EGFL6	-2.05848	0.00606913
	ADAMTSL1	2.71999	0.00113811		ZNF182	-1.60096	0.00614376
	WNT10B	3.16791	0.00116236		STARD8	-1.80603	0.00624502
	IL22RA1	2.62342	0.0011817		DMXL2	-1.59933	0.00626793
	IGDCC4	1.71371	0.00118415		TCEAL7	-1.55348	0.00627179
	RP11-613M10.8	4.28553	0.00118469		ZNF483	-1.64889	0.00633086
	MMP2	1.58119	0.00118956		ABCG1	-2.07363	0.00638244
	ARPIN	1.68495	0.00120319		GPR3	-1.54814	0.00673471
	MAP6	2.68026	0.00122553		CLDN11	-1.56417	0.00674515
	THSD4	1.68469	0.00123144		RBM44	-2.94299	0.00676198
	HAPLN1	3.01264	0.00125982		TMEM232	-2.09302	0.00676646
	CCKBR	1.70253	0.00129172		GP6	-2.47109	0.00676847
	KLF11	1.50501	0.00129424		HBQ1	-1.83688	0.00677346
	WNT7B	4.02152	0.0012985		ACSM2A	-2.05548	0.00678999
	TMEM88	2.88769	0.00129971		RP11-168P6.2	-3.35782	0.00680051
	TACSTD2	2.76745	0.001345		NPNT	-1.59411	0.00680053
	RGMA	1.6049	0.00135258		AZGP1	-3.64387	0.00682074
	TMEM119	3.7653	0.00135611		MCF2	-2.52729	0.00687482
	TNXB	2.52288	0.00136179		ZNF665	-1.76239	0.00687848
	NOS1AP	2.1972	0.00137974		SGIP1	-2.48908	0.00690047
	TMEM169	2.33544	0.00138184		RAB26	-1.55183	0.00694017
	UPK1B	2.8014	0.00139535		ZNF528	-2.18448	0.00696816
	FJX1	2.22846	0.00139814		TRIML2	-1.54028	0.00699088
	CACNA2D4	3.11674	0.00140338		SOWAHD	-1.64603	0.00700864
	ZBTB22	1.53028	0.00141983		TNFSF10	-2.51891	0.00704096
	TNF	3.08703	0.00144846		HHLA2	-1.65395	0.0070527
	EGFLAM	2.50407	0.00147343		EML6	-2.6155	0.00711814
	COL16A1	1.9308	0.00148052		MOSPD2	-1.53662	0.00717355
	RBBP8NL	3.30766	0.00148684		SCML1	-1.74475	0.00720325
	MICAL2	3.22968	0.00150045		ALOX15B	-2.92474	0.00724637
	SORCS2	2.69381	0.00151523		ANKRD29	-2.03619	0.00729987
	APCDD1	2.44563	0.00153643		GDF15	-3.11201	0.00734502
	DKK2	2.83908	0.00158018		SLC7A14	-1.81475	0.00734587
	CYP1B1	1.77824	0.00160762		DPPA5	-2.2204	0.00751882
	OAS3	1.73779	0.00165661		CYSLTR1	-1.9756	0.00753278
	HMX2	3.69986	0.00168407		SPIN2A	-1.87134	0.00760737
	ALPK2	2.86343	0.00170181		BATF3	-1.79361	0.00762366
	ZNF467	2.89227	0.00171108		PCDHA1	-2.17409	0.00764682
	MEOX1	3.54714	0.00173249		KCNJ3	-2.51989	0.00765123
	DUSP1	1.59445	0.00173451		NPIPP1	-1.53641	0.00776027
	ETV3L	2.95166	0.00174131		NLRP7	-1.95778	0.0077792
	HTR1D	2.2778	0.00176681		NUPR1	-1.67992	0.00790373
	ME3	2.21371	0.00177435		SBSPON	-1.78069	0.0079394
	KCNC3	2.2103	0.00177897		CHST9	-1.85005	0.00803331
	SRPX2	3.2252	0.0018024		AL136097.1	-2.00276	0.00823095
	MINOS1-NBL1	5.10858	0.00181111		NMNAT3	-1.89864	0.0082346
	SEMA6D	1.98832	0.00181153		RP11-159D12.5	-2.18004	0.00823834
	NAALADL2	2.47067	0.00182972		VSTM1	-1.97709	0.0082771
	ODC1	2.15036	0.00183129		NEB	-2.32696	0.00832074
	DSG3	2.29194	0.00189019		KLKB1	-1.5088	0.00840837
	PRRX1	3.69369	0.00189024		PRDM7	-1.90467	0.00846169
	AC104532.2	3.37469	0.00191792		PLEKHH2	-1.89191	0.00854331
	CIDEB	3.58545	0.0019908		CPN2	-2.23706	0.00871736
	HHEX	2.35202	0.00199756		KLK8	-1.54988	0.00877441
	SYNDIG1	2.41811	0.00206688		GIP	-2.14637	0.0087878
	PROM2	2.15494	0.00218892		GABRE	-2.39324	0.00879818
	IFIH1	2.16674	0.00219452		CHMP1B2P	-2.03232	0.00884041
	ID2	1.93788	0.00231818		SPRY4	-1.90312	0.00907342
	SSC5D	1.95727	0.00234743		SLC17A9	-1.51398	0.00916861
	SPHK2	1.50763	0.00236386		ZDHHC19	-1.98248	0.00918954
	FZD1	2.21139	0.0024129		LCAT	-1.79342	0.00919994
	IRX2	1.67686	0.0024291		ZNF511-PRAP1	-1.97061	0.00946715
	XKR5	2.00562	0.00243616		RP11-153M7.3	-2.97503	0.00950544
	MAF	1.85455	0.00244319		EPHA10	-1.87416	0.00962575
	NID2	1.85349	0.00245923		GFAP	-2.22774	0.0096714
	NKX6-1	2.80216	0.0024915		TEX13C	-2.22698	0.00970295
	HOMEZ	1.59805	0.00250294		AC112497.1	-3.12856	0.00979072
	EFS	1.66633	0.00250342		PQLC2L	-2.20861	0.00983307
	ARSG	2.05871	0.00250875		IL6	-2.23342	0.00983527
	HMCN2	1.96672	0.00255011		MCOLN3	-1.82903	0.00994221
	NTF3	2.54973	0.0025969		FAM162B	-1.65444	0.00996397
	POU3F1	1.64604	0.00262506		DPPA3	-1.76919	0.0100083
	EFNA5	1.64477	0.00267489		ICAM2	-1.94586	0.010313
	GLUD2	3.09818	0.00273508		MUC12	-1.57038	0.0103365
	PCDH8	2.61252	0.00275265		CXCL6	-1.52246	0.0104023
	CTC-273B12.7	4.43831	0.00280084		SULT1B1	-1.95038	0.010431
	TENM4	1.68284	0.00282908		SCN3B	-1.94835	0.0104422
	LIN7A	1.89804	0.00283626		CCDC68	-1.9298	0.0104746
	LUM	4.37143	0.0028762		ERICH5	-1.6301	0.0105009
	PCDHGB6	1.97149	0.00297725		SLC52A1	-2.08291	0.0106462
	LHX2	3.76726	0.00302553		FBXL21	-1.96888	0.0106929
	RP11-108O10.8	2.43702	0.0030279		VSTM2B	-1.76544	0.0107024
	FOLR1	2.87425	0.00303202		MT1H	-1.55037	0.0108092
	DPYSL5	1.53398	0.00303688		NPY5R	-2.17109	0.0109305
	MAP2	2.49655	0.00303791		GOLGA6L4	-2.66594	0.0109529
	IGFBP7	1.85012	0.00308288		AADACL3	-2.57992	0.0110007
	PAMR1	1.81339	0.00309121		GOLGA2P11	-1.81042	0.0111547
	C15orf48	3.38638	0.00309994		KCNJ8	-2.10997	0.0112562
	RUNX1	2.20846	0.00313972		RP11-34P13.15	-1.65021	0.0113644
	IL1R1	2.53389	0.0031568		ZFYVE28	-2.14821	0.0113755
	SEMA5B	1.78073	0.00317407		GUCY2D	-2.8946	0.011549
	NTM	1.56238	0.00328681		LLNLF-173C4.1	-1.74427	0.0115993
	ITGB4	1.56646	0.00332717		ARHGAP9	-1.83051	0.0116246
	PCDHGC3	1.75904	0.0034256		ACVR1C	-1.70853	0.0116427
	ARL4C	1.69975	0.00346832		SLC13A5	-1.7775	0.0116565
	BBS1	2.53449	0.00347514		SPARCL1	-1.8216	0.0117669
	TMEM40	2.62349	0.00352924		PCDHA7	-1.98004	0.0119209
	FOXJ1	1.6126	0.003595		NPIPB15	-1.7823	0.0121044
	SRCIN1	2.25759	0.00360079		ADAM33	-1.72457	0.0122004
	IRX5	2.53495	0.00362251		LHX6	-1.50314	0.0123139
	RAI1	1.90108	0.00363155		ZFP57	-3.23853	0.0123479
	SKIDA1	2.18343	0.00367136		TENM1	-1.67542	0.0126503
	ALDH1A2	3.37851	0.00368491		KLRD1	-1.58774	0.0127713
	KCNMA1	1.62518	0.00376882		CYP2E1	-2.05553	0.012832
	HECTD2	1.75153	0.00378386		SGK3	-1.5492	0.0132198
	SMPD1	1.73086	0.00381912		RP11-240B13.2	-1.77421	0.0132707
	IFI6	1.84877	0.0038481		DDX43	-2.07362	0.0132938
	MAP1A	1.92066	0.00389979		CSMD1	-2.12463	0.0134317
	GBP3	3.18404	0.00397191		RPL23AP1	-2.18743	0.0134567
	TM4SF1	2.10655	0.00409741		SLC35D3	-2.21216	0.0134799
	MAPK4	1.58971	0.00413872		LGALS12	-1.53225	0.0137891
	SSFA2	1.55885	0.00414473		ITPR2	-1.87132	0.0138852
	THBD	3.54403	0.00428169		MMEL1	-1.70073	0.0138866
	PLCL2	1.80326	0.00432319		AC226119.4	-2.12123	0.0140817
	C19orf33	1.83549	0.00441752		2005-09-01	-1.70216	0.0140911
	DACH1	2.53784	0.00452173		SYT4	-1.8125	0.0141228
	SDK2	2.19664	0.00458217		CNTD2	-1.79079	0.0142433
	CTD-3214H19.4	4.83739	0.00461051		TMEM74B	-1.53219	0.0143926
	STRA6	1.57936	0.0046288		TUBB8	-1.59595	0.0144003
	FOSL2	1.50618	0.00463026		CACNA1F	-1.59708	0.0144013
	KCNN4	2.09543	0.0046858		ZFP92	-1.82269	0.0145064
	GNA15	2.01532	0.00469703		SUSD3	-1.55255	0.0147792
	C11orf87	2.62465	0.00476314		ABCA13	-2.13713	0.0152354
	ACTA2	1.86288	0.00484514		PDCD1	-1.92816	0.0153034
	DPP4	1.58733	0.00486488		CD19	-1.72428	0.0153495
	COL13A1	1.9178	0.00489014		CTAGE4	-1.69072	0.0157303
	SEZ6L	2.94832	0.00493129		RP11-153I24.5	-1.93988	0.0157312
	CDH23	2.41717	0.00495868		SLC22A16	-1.86735	0.0158304
	SNTB1	1.53956	0.00501091		MAB21L3	-1.60561	0.0163078
	TNFRSF6B	2.994	0.00506852		FXYD3	-1.80692	0.0165647
	SCD5	1.87289	0.0051074		GSG1L	-1.65193	0.0167353
	PPP1R1B	1.68444	0.00514931		GOLGA6A	-2.23104	0.0168152
	ZNF436	2.22431	0.00524117		SHISA8	-2.56688	0.0168631
	TH	3.00305	0.00524175		CRYGD	-1.58185	0.0168885
	DDIT4	2.15378	0.00525198		DCDC2	-1.64701	0.0173297
	SLC27A2	1.62517	0.00527236		IL21R	-2.38135	0.0174371
	NCALD	1.69234	0.0053419		TAC1	-1.73048	0.0175198
	RP11-73M18.2	1.57014	0.00553568		NPPC	-2.13465	0.0175973
	ASTN1	1.576	0.00562834		TMSB4Y	-1.56718	0.0176187
	CNTNAP1	1.7399	0.00575426		GREM2	-1.68035	0.0176898
	RIN2	1.90252	0.00585355		KCNH6	-1.67098	0.0178186
	H2AFY2	1.6725	0.0058703		ONECUT2	-1.6292	0.0181146
	GAD1	2.80619	0.00593189		ITGB1BP2	-2.30131	0.0183134
	LSM12P1	5.18095	0.00593337		MAGEA4	-2.04939	0.0185863
	ADRA2A	2.30376	0.00593692		MCOLN2	-2.09024	0.0187585
	C17orf96	2.34439	0.00597475		CHRNE	-1.76481	0.0190701
	VIPR2	2.37922	0.00604859		PGA5	-1.54194	0.0195337
	PTX3	2.60105	0.00621232		TRPM2	-2.1152	0.0195487
	BNIPL	2.00432	0.00640554		RAB33A	-1.51845	0.0201322
	CDH20	2.50709	0.00644159		LEFTY2	-2.34405	0.0201427
	SETBP1	1.66889	0.0065647		KCNH4	-1.98717	0.020209
	SLC16A4	2.37553	0.00677884		SLC9A9	-1.92025	0.0203355
	RHBDL3	1.5922	0.0068119		OVGP1	-1.91508	0.0204376
	SGMS2	1.973	0.00706232		PNMA5	-1.67347	0.0205334
	ZEB1	2.26926	0.00719739		ZNF799	-1.68858	0.0207337
	RP11-598P20.5	3.58313	0.00725132		HSH2D	-1.61737	0.0208244
	AC243587.1	1.53752	0.00735285		TRIM15	-1.77324	0.0209688
	HMGN2P5	1.53752	0.00735285		FSIP2	-2.43102	0.0209859
	PRKCDBP	1.56978	0.00740462		PVALB	-1.68129	0.0209871
	RP11-544M22.13	3.25024	0.00741782		TEC	-1.64996	0.0212242
	EPN3	1.8247	0.007522		PCDHB3	-1.56575	0.0212364
	MMP11	1.50083	0.0075241		GH2	-1.94629	0.0212504
	TGM1	2.04836	0.00752874		TMEM81	-1.57904	0.0215056
	TFEB	1.52285	0.00773137		AIRE	-1.90306	0.0216719
	RP11-61L23.2	2.35345	0.00776981		BCAS1	-2.06277	0.0220123
	ITGA11	2.16965	0.00796124		CR1	-2.03031	0.0225819
	COL8A1	1.79447	0.00803844		CA10	-1.58237	0.0226429
	FNDC1	2.55753	0.00814853		FAAHP1	-2.2241	0.0227115
	MAPK10	1.85206	0.00835487		GNRH1	-1.94565	0.0228466
	WNT11	2.02316	0.00906646		PROK2	-1.55806	0.0229275
	TMEM132E	2.61341	0.00907428		PGAM1P5	-2.06618	0.0236904
	TENM2	1.73997	0.00910958		RP11-455G16.1	-1.80376	0.0237235
	STOX1	1.64184	0.00920989		GOLGA8J	-1.90094	0.0238766
	ABLIM3	2.13736	0.0093064		SEC14L4	-1.73603	0.0246184
	CPA4	2.40272	0.00934369		TNFRSF1B	-1.5279	0.0248297
	CSPG4	1.60285	0.00935166		CACNB4	-1.53789	0.0248453
	SORCS1	1.54566	0.0093671		NUPR2	-1.52274	0.0249963
	TBC1D9	1.58386	0.00940399		RP11-295P9.13	-2.17457	0.0251656
	BNC1	2.45464	0.00944758		CD8A	-1.58979	0.0255288
	PRRT2	1.54422	0.00948108		MOG	-1.6981	0.0255579
	PRMT8	1.89057	0.00965374		MS4A4E	-1.90007	0.0256382
	CDH6	2.67987	0.00968091		GSTT2B	-1.60988	0.0257422
	LMO3	1.89418	0.00974582		CTD-2583A14.11	-1.67845	0.0261832
	MYO3B	2.12777	0.00983294		NAT2	-1.77949	0.0269952
	PSD4	1.58781	0.0102161		EFHB	-2.77667	0.027036
	HHIP	1.92971	0.0104555		ANGPTL6	-2.19215	0.0270658
	COL1A1	1.58813	0.0105054		KCNJ10	-2.00116	0.0276963
	PDK1	1.87211	0.0106121		GLRB	-2.19376	0.0277369
	ZNF469	1.78219	0.0106149		GTSF1	-1.60938	0.0279566
	TMEM173	1.67769	0.0107318		DISP2	-1.60467	0.02824
	GPER1	2.21552	0.0107797		TRPM6	-1.60526	0.0283275
	KRT19	1.86617	0.0113584		ACTA1	-1.92961	0.0287237
	CORO7-PAM16	1.83362	0.0116581		GNA14	-1.51635	0.0287382
	ZNF677	2.48723	0.0118666		TBX1	-2.65714	0.0290797
	MAFB	1.56934	0.0118877		TMEM212	-1.50283	0.0292169
	ARRDC3	1.8206	0.0120519		CYP3A5	-1.56385	0.029303
	FBXL13	1.96487	0.0122696		PYY	-1.81728	0.0294117
	LHX4	2.50174	0.012275		RHBG	-1.65667	0.0296352
	AC090094.1	4.73429	0.0125782		RP11-562I5.1	-2.59764	0.0296557
	FERMT1	1.61593	0.0128192		USH1C	-1.66793	0.0301122
	AC006486.9	4.33746	0.0130465		ZFP42	-1.77575	0.0305407
	DRD2	2.24675	0.0131839		SLC5A9	-1.88108	0.0307966
	MGLL	2.29295	0.013374		DNAJC12	-1.52005	0.0309395
	NDRG1	1.50206	0.0133807		TMEM151A	-1.54776	0.0319669
	SSTR1	1.88744	0.0134511		PIK3AP1	-2.03499	0.0319949
	IQCK	1.83353	0.0135164		AMY2B	-1.55663	0.0322992
	ADGRL4	1.6549	0.0135485		EMX1	-1.6046	0.0326204
	C10orf10	1.78964	0.0136627		RAMP3	-1.71863	0.0326744
	GDF1	3.26465	0.0137016		GDPD3	-1.56131	0.0330065
	CAMK1G	2.22871	0.0140642		ISL2	-1.88994	0.0330346
	SH3RF2	1.57135	0.0142833		SRGAP2D	-3.45056	0.0330875
	JPH2	1.77382	0.0143588		CTD-2369P2.12	-1.89132	0.0332729
	ZNF69	2.05786	0.01443		PTPN7	-1.91092	0.0334117
	SHANK1	1.55879	0.0145044		P2RY1	-1.67285	0.0334214
	KCNK10	1.98582	0.0145053		RP11-364B14.3	-1.64421	0.0336297
	ZNF703	1.71496	0.0145066		RP11-157G21.2	-2.64474	0.0342771
	NOD2	2.16135	0.0145978		GRIN1	-1.85113	0.0344914
	GAD2	2.03771	0.014653		TEPP	-1.62347	0.0347927
	TMEM265	2.22028	0.0148796		TAF7L	-1.56976	0.0349688
	HOXB3	2.39678	0.0149163		MYEOV	-1.50994	0.0354305
	SP100	1.50415	0.0151256		PFN1P2	-2.34941	0.0360493
	GPR162	1.77295	0.0155594		NTS	-1.8003	0.0362272
	STC1	1.65281	0.0156083		GUCY2C	-1.97252	0.0366542
	MBNL3	1.83381	0.0156248		RGPD6	-1.55821	0.0373086
	EVA1A	1.58307	0.0159262		TMEM171	-1.85058	0.0378938
	HOXB2	2.22206	0.0164802		AC009014.3	-2.35738	0.0380323
	BGN	1.68814	0.0166994		C11orf45	-1.5228	0.038814
	DUOXA1	2.29909	0.0167343		RLN2	-1.85047	0.0391732
	ILDR2	1.64831	0.0173165		C2orf88	-1.5865	0.039701
	APBB1IP	2.27144	0.0174104		TULP2	-1.52588	0.0398818
	SYT10	2.09667	0.0176531		GJA3	-1.64177	0.0403196
	COL2A1	1.87783	0.0178031		ARHGEF15	-1.5248	0.0403705
	DGKI	1.7674	0.0178481		AKR7A3	-1.60674	0.0414517
	EOMES	2.19285	0.0179189		RP11-124L9.1	-2.37362	0.04204
	P2RY6	2.06277	0.0179846		NANOGP8	-1.96067	0.0420819
	A2M	2.09127	0.0182694		FAR2P1	-1.7659	0.0432079
	LRRC32	1.78731	0.0183324		TSKS	-1.59204	0.0436917
	BCO1	1.94452	0.0199187		VSIG2	-1.62427	0.0443598
	MPZL2	1.53129	0.0203733		DND1	-1.58439	0.0446891
	MMP23A	3.0249	0.0205325		RP11-1023L17.2	-1.76687	0.0457506
	C5orf38	1.57995	0.0206729		HCST	-1.53467	0.045763
	FGF17	2.09103	0.0208033		C5orf58	-1.66219	0.0459413
	COL6A3	2.26602	0.0209106		RGAG1	-1.59214	0.046004
	CPLX2	1.53043	0.0211817		ANKRD33	-1.64109	0.0468528
	NECAB2	1.6165	0.0216078		TMEM249	-1.63579	0.0469045
	AL049829.1	1.96672	0.0216135		IL16	-2.0728	0.0474047
	HHAT	1.75332	0.0218584		RP11-29H23.5	-1.72988	0.0474722
	SLC22A3	1.78238	0.0221534		NLRP12	-1.6909	0.0482768
	KCTD8	1.99532	0.0222471		HFE2	-2.17516	0.048833
	RP11-565P22.6	1.87339	0.0224176		NEK5	-1.55519	0.0489338
	CST1	2.03194	0.0224752		CELP	-2.13642	0.049552
	PPP1R14C	1.51621	0.0225243		POLR2J2	-2.19675	0.0495736
	IKZF2	1.75309	0.0225502
	ANKRD37	1.58431	0.0227691
	SDSL	2.04874	0.0227883
	YAF2	1.72726	0.0230818
	CTD-2331H12.8	4.27288	0.0237336
	SEC14L2	1.52543	0.0239389
	WFIKKN2	2.15137	0.0243706
	TCEA3	1.87058	0.0250361
	RARB	1.8659	0.0253127
	RRAD	1.91137	0.0253547
	PFKFB4	1.60512	0.0253682
	GJB3	1.55869	0.025515
	SLC24A3	1.57118	0.0255751
	WNT8B	1.58766	0.025775
	THBS2	1.81037	0.0260661
	HPSE2	1.54141	0.0263105
	ZBED6	2.20129	0.0263911
	GRHL3	1.825	0.0264055
	RTN4RL1	2.22917	0.0264459
	CCDC87	1.79901	0.0265332
	RP11-651P23.4	2.00186	0.0266756
	CA9	1.62717	0.0279822
	HSF2BP	1.90756	0.0280217
	RP11-438J1.1	2.92259	0.0283765
	GGACT	1.82479	0.0286559
	VEGFC	1.87247	0.0288396
	CCL2	1.7068	0.0293294
	SRP9P1	3.51453	0.0294647
	AC066615.1	3.49959	0.0298015
	RP11-463D19.2	2.46795	0.0298073
	TMEM132C	2.03052	0.0303072
	MFAP4	1.50988	0.0303369
	MEIS1	1.95743	0.0305915
	IER5L	2.16829	0.0306751
	PDE3A	1.51775	0.0308267
	ADAMTS6	1.51182	0.0314413
	CTC-575D19.1	1.94466	0.0315048
	PIPSL	1.56904	0.0320328
	DRD3	1.71223	0.0323109
	TNFSF4	1.51648	0.0337552
	SLC16A8	1.65625	0.0338252
	PXDC1	1.54155	0.0338681
	PDZK1	1.60941	0.0341458
	FAM3C2	3.30759	0.0341996
	RP1-37E16.12	2.92067	0.0352736
	GPRC5A	1.7711	0.0357667
	NNMT	2.15438	0.0357917
	CASP4	1.62445	0.0361381
	RP11-101E3.5	1.66088	0.0361884
	AP000275.65	1.66005	0.0363082
	WNT4	1.88543	0.0370254
	S100A3	1.55811	0.0373225
	NPIPA5	1.67441	0.0389152
	CAPN9	1.65374	0.0398245
	SOX5	1.51294	0.0408321
	AL109923.1	3.14713	0.042761
	MSX1	2.48996	0.0434269
	TTC30B	1.76733	0.0434645
	BLOC1S5-TXNDC5	3.24503	0.0439655
	ZNRF2P2	2.09305	0.044592
	CTD-2116N17.1	1.58268	0.0448321
	PAX3	2.57541	0.0453075
	IRX3	1.81842	0.0456223
	TBX3	1.6552	0.0464989
	DRD4	1.83547	0.0474882
	AC008522.1	2.52637	0.0478613
	XXbac-BPG246D15.9	2.20383	0.0495625

## Sheet: vs AMIQ hESC-hAEC-CM
	gene_symbol	logFC	P.Value		gene_symbol	logFC	P.Value
	RPL3P4	11.4126	1.41771e-09		POSTN	-8.80407	6.52853e-08
	AGR2	8.93728	8.66576e-07		DKK2	-5.63176	1.55734e-06
	VTCN1	6.4565	3.38391e-06		MTND1P23	-4.45142	2.47692e-06
	CRB2	4.02839	8.08659e-06		LAMA4	-4.70907	4.47938e-06
	IRX2	3.07497	1.0405e-05		LOX	-3.87172	8.78645e-06
	SOX21	3.98459	1.53646e-05		IGFBP5	-2.83818	1.08071e-05
	FEZF1	5.66526	2.22305e-05		COL15A1	-5.85991	1.31557e-05
	IGF2	5.47558	2.37433e-05		COL4A1	-2.61342	1.37614e-05
	TRIM29	5.83993	3.13491e-05		MAP3K7CL	-4.60419	1.56986e-05
	OLIG3	5.36076	3.13494e-05		COL8A1	-4.89279	1.85673e-05
	PLEKHB1	3.19522	3.13602e-05		DDR2	-4.05403	2.21983e-05
	RSC1A1	5.39947	3.2058e-05		NTM	-2.809	2.3009e-05
	CORO7-PAM16	5.88205	3.51903e-05		COL11A1	-2.63147	2.31759e-05
	CTC-273B12.7	5.99233	3.70689e-05		CPA4	-5.47111	2.61214e-05
	C1orf21	2.39171	3.94893e-05		LOXL4	-3.78136	2.80855e-05
	S100A14	4.58449	4.18808e-05		ITGBL1	-3.44666	2.86994e-05
	BTBD17	4.33941	4.34799e-05		AC010970.2	-2.55399	3.38439e-05
	CLIC3	4.74421	5.08481e-05		SPOCK1	-2.84626	3.96848e-05
	CYP26A1	2.52838	5.13667e-05		SCG2	-4.70434	4.32557e-05
	SFRP1	2.36814	5.74266e-05		PLBD1	-2.42068	4.56513e-05
	ANXA8	5.27188	5.87429e-05		HAS2	-2.78121	5.06304e-05
	AC027682.1	6.29763	6.00181e-05		ANTXR2	-2.67269	5.15497e-05
	PLSCR5	5.1803	6.07813e-05		TNFRSF11B	-3.31303	5.8428e-05
	PKDCC	3.71027	6.29176e-05		HTRA1	-3.1029	6.19043e-05
	KRT14	5.59729	6.63509e-05		BGN	-4.95627	6.28965e-05
	C6orf141	4.22553	7.83129e-05		EMILIN1	-3.57212	6.52964e-05
	SOX1	5.29181	7.94978e-05		LTBP2	-3.15699	6.56396e-05
	KRT16	5.98091	8.77444e-05		EDIL3	-2.35705	7.29393e-05
	PPP1R1B	2.81868	8.84457e-05		IGFBP7	-3.04838	7.3705e-05
	RAX	4.65006	9.7233e-05		ADAM12	-4.20697	7.91644e-05
	KRT17	5.29258	9.91533e-05		HMCN1	-2.74117	8.80781e-05
	RSPO3	5.90372	0.000106902		GALNT5	-3.2971	8.82272e-05
	AL034550.1	4.81069	0.000109646		AEBP1	-2.37075	9.35895e-05
	ANXA8L1	3.86282	0.00011152		PRRX1	-3.35259	9.86586e-05
	RPL13AP5	3.93934	0.000117858		TNFSF4	-3.4661	9.88007e-05
	UGT1A6	4.65099	0.000121963		AMIGO2	-3.30364	0.000101242
	KRT5	6.47331	0.000136444		KIF26B	-2.66006	0.000106752
	COL17A1	5.23534	0.000140007		ITGA11	-5.22869	0.000108716
	KANK4	2.93624	0.000172745		GPC6	-2.07217	0.00011768
	OTX2	2.87259	0.000173363		SSC5D	-2.52353	0.000131483
	PKP1	2.62027	0.000178672		TENM2	-3.1774	0.00013665
	ITGB6	5.43154	0.000180062		COL22A1	-4.15674	0.000141272
	TNNT3	6.09082	0.000192081		FAP	-2.81737	0.0001434
	LHX5	6.45055	0.000193761		ADAMTS12	-2.2826	0.000146862
	LRP2	3.11111	0.000202615		FILIP1L	-2.88676	0.000157971
	DAPP1	3.86355	0.000231026		PLAT	-2.87635	0.000172326
	AGR3	4.5098	0.00023541		MRC2	-2.25488	0.000173579
	NPIPA5	4.79551	0.00023565		SSPN	-3.05187	0.000208437
	DRD2	4.68796	0.00024234		INHBA	-4.90751	0.000221048
	EIF3FP3	2.90927	0.000270113		ST3GAL5	-2.46995	0.000229008
	PIPSL	4.37243	0.000272815		NNMT	-5.01918	0.000230924
	CDSN	5.16753	0.000274189		ADGRL4	-2.55106	0.000233068
	TTYH1	2.42228	0.000302879		LTBP3	-2.44629	0.000241138
	ACKR3	2.85968	0.000306637		COL5A2	-3.23581	0.000246024
	OSR1	3.26442	0.000306779		CDH11	-2.04708	0.000247283
	SEMA5B	2.08725	0.000313363		COL8A2	-3.11565	0.00024813
	PLCL2	2.13439	0.000315261		ANKH	-2.19032	0.00025101
	C15orf48	4.76141	0.000327565		COL4A2	-2.06942	0.000269703
	SEPP1	1.93824	0.000343784		DCBLD2	-1.96063	0.000277369
	MT1H	3.58789	0.000344804		COL1A1	-3.20062	0.00028589
	CPLX2	4.29951	0.000347406		MOXD1	-2.27193	0.000286731
	RAB4B-EGLN2	4.90469	0.000347838		F2RL2	-3.93379	0.00028706
	PAX6	4.9812	0.000355501		CEMIP	-5.34325	0.000291335
	C8orf4	2.74696	0.000368771		ENG	-2.85094	0.000294137
	SOX3	1.9764	0.000397802		CYBRD1	-2.1589	0.000319147
	FIGNL2	2.77942	0.000401072		COL6A2	-3.36372	0.000324639
	PSG5	3.66277	0.0004113		SYTL4	-3.20411	0.000336121
	SMOC1	3.15218	0.000418977		ACTA2	-3.16833	0.000352522
	FEZ1	1.87164	0.000430724		ADGRF5	-4.74516	0.000354512
	SCN4B	2.61804	0.000435796		PTX3	-2.9534	0.000362487
	CSF1R	3.54077	0.000441964		NFIX	-3.24207	0.000371058
	GDPD2	2.30218	0.000444937		BICC1	-3.68501	0.000380773
	GREB1L	5.19448	0.00046505		PLA2R1	-3.04843	0.000382078
	CST6	2.9198	0.00048973		RCAN1	-2.84922	0.000382796
	CTC-575D19.1	4.55371	0.000512911		SRPX2	-4.02602	0.000389916
	GNA15	3.38834	0.000561883		PITX2	-3.14699	0.000390275
	CHI3L2	4.25608	0.000575132		MSRB3	-2.32075	0.000395293
	PTGES	2.01931	0.000601995		PKIB	-2.25915	0.000399056
	EEF1A1P11	3.0045	0.000637852		ADAMTSL1	-3.31913	0.000403865
	LGR5	3.45527	0.000649823		NPR3	-3.16197	0.000406943
	KIF19	3.27347	0.000655507		NBPF14	-1.88012	0.000428005
	SLC16A9	2.11291	0.000662331		DAB2	-1.98636	0.000432066
	ATP1A2	2.27314	0.000672321		COL1A2	-2.55723	0.000432783
	NLGN3	1.74082	0.000687459		CTHRC1	-2.69387	0.000432946
	FEZF2	4.68176	0.000718704		TIMP1	-2.72817	0.000433033
	IL22RA1	3.60715	0.000722149		ADAM9	-1.82048	0.000436163
	HAND1	5.49674	0.000766957		PALLD	-1.58004	0.000441878
	EEF1A1P9	3.30478	0.000770105		AFAP1	-1.64367	0.000453952
	BLNK	4.16837	0.000801942		MMP14	-2.50959	0.000458306
	KRT7	3.11531	0.000860194		NT5E	-3.2607	0.000478051
	CNTN2	2.24693	0.000883042		SIX1	-3.41461	0.000484972
	HESX1	2.57545	0.000902964		DYNLT3	-2.13069	0.000491992
	AC022182.2	3.08515	0.000927237		CDH13	-2.03951	0.000492201
	MUC16	4.1453	0.000992252		VEGFC	-3.2569	0.000497774
	LRRC4	2.22934	0.00104864		FBLN5	-2.55374	0.000516695
	DLK1	5.40678	0.00105273		VCAM1	-5.30108	0.0005185
	LAMA3	3.41193	0.00105495		COL6A1	-3.15989	0.000532137
	UQCRHL	3.00708	0.00105853		MBNL1	-2.05508	0.00053359
	CACNA1G	2.3719	0.00106171		COL5A3	-2.51272	0.000536739
	MB	3.39728	0.00107304		RGS4	-5.22459	0.000538094
	SMN2	1.53447	0.00110674		LAMC3	-2.43782	0.000538572
	MFAP5	1.95782	0.00112363		PLOD2	-1.92056	0.000540478
	KCNH2	1.68195	0.00112425		F2R	-1.69973	0.000576751
	MAPK4	2.11972	0.00117366		ADGRA2	-2.60132	0.000591208
	SIX3	5.20271	0.00122509		ITGA1	-2.36282	0.000595611
	CRISPLD2	2.60814	0.00123461		FAM114A1	-2.0426	0.000621473
	C5orf38	2.90456	0.00125676		NRP1	-2.43124	0.000628746
	MTND4P12	2.56026	0.001264		TGFB3	-2.73992	0.00063781
	SEZ6	3.20602	0.00130897		FBXO32	-2.53673	0.000651352
	DPYSL5	2.67936	0.00138421		KIAA1549L	-2.24786	0.000660734
	COL9A1	1.70972	0.00142454		DPYD	-2.57935	0.000670727
	CYP26B1	4.38716	0.00142964		IL13RA1	-1.93134	0.000698042
	MSLN	3.99017	0.0014327		OSMR	-2.70969	0.00070707
	NPTX1	3.72925	0.00143861		HSPB6	-2.31583	0.000721131
	PAPLN	2.19541	0.0014653		APCDD1L	-3.855	0.000749683
	NECTIN4	2.55874	0.00152609		MXRA5	-2.72583	0.000767842
	FXYD6	1.73666	0.00153163		GDF6	-3.12674	0.000786075
	CAPS	2.14026	0.00153969		GREM1	-3.45682	0.000801271
	IGFBPL1	1.57535	0.00157162		ARID5B	-2.46205	0.000805197
	EEF1A1P12	2.68381	0.00161185		GBP3	-2.82425	0.000808148
	CPXM2	1.63126	0.00166218		TLR4	-2.4462	0.000821652
	RP11-598P20.5	4.96883	0.00167103		CALD1	-1.81572	0.000849996
	PYGM	1.89766	0.0017017		PLXDC1	-3.19685	0.000875114
	FRZB	2.45763	0.00170322		GPAT2	-2.80681	0.000889509
	TRPM3	1.88016	0.0017721		FIBIN	-4.2028	0.000904621
	CNTFR	4.61247	0.00179344		ADAM19	-2.03208	0.000904981
	BLOC1S5-TXNDC5	5.36346	0.00182177		TNC	-2.30124	0.000943451
	GPC3	2.06327	0.00186629		COL6A3	-5.55246	0.000970847
	NRXN2	2.12989	0.00187277		CLSTN2	-2.51108	0.00098813
	LAMB3	2.98745	0.00188891		ITGA4	-2.50903	0.00100504
	RP11-371A22.1	3.92626	0.00189215		PDGFC	-1.7254	0.00101699
	CCDC177	2.37951	0.00193815		RP11-34P13.15	-2.09099	0.0010341
	AC090498.1	2.94854	0.00195507		LRP10	-1.96805	0.00103463
	EEF1A1P4	2.70578	0.0020289		ZMAT3	-1.80504	0.00104255
	LIX1	5.79674	0.00203393		ITGB1	-1.52151	0.00106923
	TSGA10IP	2.62781	0.0021061		UAP1L1	-2.06877	0.00109576
	WSCD2	2.16555	0.00211863		CTGF	-2.03375	0.00110043
	GALNT9	4.86768	0.00214013		LRRC17	-2.33671	0.00110688
	LRRC4B	3.14989	0.00216428		TIMP3	-2.32061	0.00110945
	KRT6A	5.94995	0.002177		GREM2	-3.5717	0.00111937
	FST	1.95771	0.00221221		COL10A1	-5.13172	0.0011194
	LHX2	3.83332	0.00237224		SYNE1	-2.16476	0.0011305
	IGHG1	6.20402	0.00237328		VSNL1	-2.03513	0.00113648
	CTNND2	1.87523	0.00240058		LEFTY2	-3.912	0.00116399
	FAM19A2	2.57252	0.00242253		TNFRSF10D	-2.23231	0.00120074
	MAP6	3.3153	0.00244172		MVP	-2.26581	0.00120773
	MPZL2	2.1658	0.00246705		SAPCD2	-1.65532	0.00121772
	LMX1A	4.90866	0.00248857		FKBP9	-1.53566	0.00123416
	LEF1	2.32003	0.00257913		DIRAS3	-5.75702	0.00123835
	IGKC	5.9292	0.00258484		FBN1	-3.0423	0.00124393
	WNT10A	3.04163	0.00270027		KLF2	-3.4804	0.00127017
	HPSE2	2.59216	0.00270949		AFF3	-2.074	0.00127125
	PRRT2	1.6489	0.00271395		MT-ND6	-2.23924	0.00129626
	GJB3	3.52139	0.0027205		NTN4	-2.66305	0.00133012
	HCK	2.64874	0.00272633		PTPRE	-2.89321	0.0013572
	TINCR	2.54604	0.00274126		CHSY3	-3.98839	0.00136451
	ZBTB16	2.92605	0.00274567		COL12A1	-3.31928	0.0013687
	FBLN7	2.54763	0.00285977		GSTM3	-1.97286	0.00139135
	TTBK1	2.21405	0.00286595		MAP1A	-2.1573	0.00141016
	SLITRK6	3.38389	0.00291252		CASP4	-2.37859	0.00144127
	NOG	3.02462	0.00292315		COPZ2	-2.02245	0.00144814
	DISP3	1.71007	0.00295346		PLXNB3	-2.22413	0.00148777
	WNT11	2.37083	0.00295411		LMO7	-2.12917	0.00153561
	P2RY6	2.69841	0.00299288		ITGB1P1	-1.93549	0.00155729
	DUOXA1	2.80007	0.00308116		SYTL5	-2.66763	0.00156892
	CEND1	1.74757	0.00313386		CD68	-2.73956	0.0015781
	UNC13D	1.52042	0.00315727		NBPF10	-2.07824	0.00168932
	POU3F1	1.71567	0.00315882		SULF1	-1.77722	0.0017048
	HES3	2.07706	0.0032483		PLPP4	-3.60411	0.00170841
	TGM1	2.19454	0.00328729		RCN3	-1.96047	0.00171366
	WNT6	4.86526	0.00339327		HSPB7	-2.33066	0.00171611
	FOXP4	1.74617	0.00342968		ELK3	-1.52671	0.00175134
	WNT10B	4.08962	0.00345762		PCDH10	-1.71311	0.00176188
	AC104532.2	3.51057	0.00347339		FAM157A	-1.96646	0.00179512
	MAFB	2.01775	0.00348914		KIAA1755	-3.37686	0.00181601
	MT1G	1.84129	0.00355487		SNED1	-2.62349	0.00182125
	TRPC4	3.1368	0.00357549		ETS1	-1.71106	0.00185403
	NNAT	2.03065	0.00360008		SEMA3C	-2.00676	0.00186584
	BMP2	2.34281	0.00363599		FKBP14	-1.76817	0.00186662
	MEGF11	2.18799	0.00368207		ATP10D	-1.73025	0.00200321
	DSG3	2.84953	0.00377208		DUSP6	-1.57796	0.00202005
	CST1	3.16347	0.00385152		FN1	-2.19558	0.00205702
	MYLPF	2.81789	0.00387482		CDKN1A	-1.81064	0.00209408
	TNF	2.93891	0.00393396		TGFB2	-2.07185	0.00216709
	EPHA4	2.31049	0.00396035		KDELR3	-1.8271	0.00219985
	FABP7	2.255	0.00400719		RPLP0P2	-2.8355	0.00242739
	CLIP3	1.55587	0.00406458		ARHGAP18	-1.96697	0.00248602
	MTRNR2L4	2.37236	0.00407205		FAAH2	-1.64393	0.00250819
	SLC2A1	1.60905	0.00417078		MMP1	-5.62609	0.00252299
	PPP1R14C	2.34511	0.00423244		THBS2	-3.6208	0.00253617
	TMSB15A	1.51938	0.00427566		PTPRB	-2.37852	0.00264276
	DPF1	1.84133	0.00428815		FRMD6	-1.68891	0.00272429
	GTF2H2B	5.17391	0.00444386		BTN3A3	-2.38484	0.00279692
	LSAMP	1.89104	0.00449215		NFIC	-1.76739	0.00297699
	MSI1	1.53226	0.00458204		VCAN	-2.14398	0.00297962
	RHBDL3	2.4629	0.00463991		HPGD	-1.69387	0.00304967
	CTD-2331H12.8	2.21771	0.00464611		CMKLR1	-3.24612	0.00309091
	CASC10	1.6026	0.00466195		ST6GAL2	-1.76643	0.00311469
	SLCO2A1	2.13521	0.00478159		DRP2	-2.41288	0.00311755
	ADGRG1	1.8473	0.00494979		SP100	-1.80132	0.00318123
	C11orf87	2.24116	0.00523513		PHLDB2	-1.82004	0.00324713
	S100A3	2.56574	0.00531638		DLC1	-2.14249	0.00338272
	TJP3	1.57077	0.00536389		TBXA2R	-2.25316	0.00340028
	LMO1	3.65998	0.00536618		MPP1	-1.70236	0.00342476
	NCAN	2.18409	0.00545101		LLNLF-176F2.1	-2.96336	0.00343013
	SRCIN1	2.4297	0.00558463		CSPG4	-2.10393	0.00343188
	C1QTNF4	2.18176	0.00576917		CXCL6	-2.38972	0.00345446
	C10orf11	1.89547	0.00577166		TMEM173	-1.78736	0.00346439
	GPRC5C	2.01047	0.00599112		SERTAD4	-1.77176	0.00355334
	CUZD1	3.29426	0.00600406		STARD13	-1.52167	0.0035591
	UPK3B	2.01564	0.00617779		NCAM2	-2.47592	0.00359146
	PSTK	1.54901	0.00625978		DOCK10	-2.73437	0.00367327
	UPK1B	2.68299	0.00633252		MMP2	-1.6653	0.00370304
	PAMR1	2.11278	0.00633815		ERAP2	-2.86613	0.00370697
	PTH1R	2.23869	0.00635932		NFIA	-2.85764	0.00371865
	CDKL1	2.10755	0.0064724		MGP	-3.57799	0.0037404
	RTL1	2.2435	0.00654539		SORCS2	-2.2052	0.00374948
	NPIPA2	2.33768	0.00664678		GBP1	-3.81612	0.00381057
	TTYH2	1.86722	0.00667065		MSC	-2.4456	0.00382705
	FOLR1	3.15971	0.00679232		ITGA10	-2.82729	0.00382749
	CTD-3074O7.11	4.70542	0.0068299		HOXB3	-2.77421	0.00389272
	PROM2	1.68953	0.00687737		NBPF20	-2.37463	0.00393747
	C17orf96	2.66565	0.00701312		THBS1	-2.97873	0.003953
	EDN1	1.7603	0.00711318		SLC4A4	-2.07687	0.003969
	MAPK10	2.30012	0.00737462		PCDHGC5	-2.7381	0.00403266
	ZBED2	2.46559	0.00757787		ISLR	-2.79709	0.00403708
	HHEX	2.35597	0.00762237		RAB27A	-1.5791	0.00413782
	ETV3L	2.72582	0.0077217		WNT5B	-2.20111	0.00421658
	HS3ST5	1.82708	0.00778738		ZEB1	-2.59497	0.00426943
	CDH23	2.78625	0.00789617		DIRC3	-2.95418	0.00430612
	TMEM132C	3.3645	0.00799394		GDF3	-2.07711	0.00431067
	MISP	2.20829	0.00800211		GDA	-2.47121	0.00437704
	RPL4P4	2.23693	0.00808536		CHRNA1	-4.63806	0.00452133
	ZNF385A	1.52569	0.00821421		CNRIP1	-1.81579	0.00456439
	CTD-3214H19.4	2.69733	0.00840008		COL25A1	-1.84314	0.00458356
	PRTG	3.44772	0.00841957		TGM2	-1.57004	0.00466029
	MBNL3	1.71423	0.00846348		PAPPA	-2.09599	0.00473379
	RPL6P27	2.39447	0.00846554		TAOK3	-1.74894	0.00479007
	ZNF521	1.73497	0.00847114		FGF5	-3.74971	0.00487337
	PTPRT	2.89416	0.00849037		PRNP	-1.89045	0.0049429
	AP000275.65	2.21474	0.00853747		CERKL	-2.22256	0.0050311
	ASTN1	1.67363	0.00874855		PIEZO2	-1.63123	0.00504234
	WNT4	3.03334	0.00895588		HEY1	-2.47252	0.00518016
	FAM83A	1.73931	0.00896047		UBA7	-2.60163	0.00529751
	NPM1P27	2.17661	0.00906291		PTGS1	-1.87769	0.00535602
	HNRNPCP2	3.23261	0.00916599		CLIP4	-3.17312	0.00538361
	TMEM88	2.73331	0.00923862		TRPM2	-2.93251	0.00545208
	PCDHGC4	1.86689	0.00935018		ATP8B1	-1.9164	0.00546035
	POU3F4	2.81578	0.00935391		SRPX	-1.84456	0.00555415
	DHRS2	2.23041	0.00940474		FAM26E	-3.42974	0.00582543
	TAC3	1.97669	0.009418		GXYLT2	-1.68909	0.00584741
	RND1	1.89273	0.00942192		ANPEP	-2.24363	0.00585544
	NXPH3	2.0641	0.00944593		AL513122.1	-6.71636	0.00587291
	BIK	2.29831	0.00945612		PDLIM3	-1.82893	0.0059705
	MEOX1	2.78745	0.00951925		ADAMTS14	-2.2995	0.00605249
	EFNA2	1.86414	0.00978913		RFTN1	-1.71387	0.006119
	LRRTM1	1.57325	0.00985863		OXTR	-3.02049	0.00638483
	BNIPL	2.08282	0.0099365		GATA6	-2.83308	0.00648483
	PDZK1	2.1655	0.0100592		PDGFRL	-1.6544	0.00656574
	KCNC3	1.98478	0.0100663		PRSS12	-1.51118	0.00665414
	EEF1A1P19	1.90189	0.0101649		EREG	-3.4921	0.00683647
	OPTC	2.02305	0.0105583		ABCC3	-1.89544	0.00711647
	MAPK8IP2	1.94236	0.010584		FLI1	-2.54525	0.00713424
	GPR162	2.35229	0.010698		ATP10A	-2.266	0.00722614
	MUC20	2.51124	0.0107833		GBGT1	-1.51221	0.00727358
	NOS1AP	1.83587	0.0108262		GDF15	-1.7988	0.00730107
	ACKR2	1.94693	0.0110204		NPAS2	-1.71657	0.00731287
	RPL17-C18orf32	1.91584	0.0110421		CYTL1	-1.93019	0.00744974
	SLC15A2	1.63239	0.0111588		SOCS3	-1.53452	0.00753915
	APOA1	4.54928	0.0112369		CTSK	-1.73696	0.00756209
	EPSTI1	1.90231	0.0112838		HS3ST3B1	-1.61642	0.00762063
	KLHL14	1.70914	0.0113776		ACTG2	-3.36279	0.007708
	STXBP6	1.54584	0.011418		CD44	-1.59374	0.00790896
	CTD-3138B18.4	4.66147	0.011505		EXTL1	-1.79776	0.00797916
	LA16c-380H5.3	1.95928	0.0115738		TCL1A	-2.12553	0.00805681
	RP11-613M10.8	2.92174	0.0116825		MYH2	-2.44644	0.00806761
	MFSD4A	2.08873	0.0119047		BDKRB2	-2.58009	0.00807928
	NECAB2	2.42989	0.0121519		ITPR2	-2.66672	0.0081021
	KRT19	2.57053	0.0122342		CBR3	-1.83876	0.00813818
	CA3	2.06505	0.0124129		MT-ND5	-1.83418	0.00815041
	OTX1	2.28628	0.0124645		ULBP2	-2.58729	0.00818503
	ILDR2	1.85869	0.0126089		LCP1	-2.55552	0.00819259
	FLRT3	2.79294	0.0127185		SFXN3	-1.53725	0.00855363
	CACNA1E	2.07179	0.0128944		MT-ATP8	-2.20272	0.00858607
	LIN7A	1.53845	0.0129684		RGS16	-1.59573	0.00864576
	LGI1	3.5644	0.0130439		DCN	-2.73566	0.00869577
	TMEM132E	2.00805	0.0131772		RNASE4	-1.57659	0.00879911
	GNG3	1.53213	0.0135322		LRFN5	-1.69999	0.00882295
	CRABP2	1.54349	0.0136034		POU2AF1	-1.82103	0.00884159
	PCSK1N	1.67715	0.0141959		CD274	-3.32547	0.00892485
	TMEM189-UBE2V1	1.84745	0.0142019		CCPG1	-1.78613	0.00900296
	IRX1	3.10902	0.0142737		TMED7-TICAM2	-1.78475	0.00905841
	GLT1D1	1.50493	0.0145291		B4GALNT1	-2.12929	0.00923121
	CABP7	2.68749	0.014564		LLNLF-173C4.1	-1.92047	0.0093241
	PNMT	1.68188	0.0147009		RAB27B	-1.75625	0.0093609
	PDYN	2.30572	0.0147852		MTCO1P12	-1.89392	0.0093768
	MAP2	2.53277	0.0152905		WNT3	-1.72654	0.009395
	SLIT1	3.03322	0.0153502		TNS1	-2.18888	0.00940365
	SLC30A2	1.95754	0.015419		RIN2	-1.54552	0.0095078
	NPIPA3	2.17091	0.0156557		GDF5	-3.92817	0.00963275
	DIO3	3.10543	0.015664		NR2F2	-1.72066	0.00968756
	RPL9	1.526	0.0158157		INPP4B	-1.81005	0.00970588
	PNCK	1.7899	0.0158968		SVEP1	-2.00472	0.00974738
	RPLP0P6	2.1197	0.0160288		HRH2	-1.62828	0.00982786
	CLDN9	1.8766	0.0161285		TMEM171	-2.96089	0.00982882
	ODC1	2.03855	0.0161532		PCED1B	-1.5182	0.00991799
	WNT8B	2.01211	0.0165402		DPPA2	-1.69399	0.00993811
	PLA2G7	1.59999	0.0165446		TNFRSF6B	-2.85937	0.00994359
	LYPD3	1.72318	0.016586		CD82	-1.89049	0.0100401
	P2RX2	1.66006	0.016621		RBMS3	-1.54481	0.0100726
	LRRN4	1.91121	0.0168719		EVA1A	-1.77765	0.0104093
	EPAS1	1.60702	0.0169748		NUPR1	-1.77911	0.0105509
	SKIDA1	2.16542	0.017285		GLT8D2	-1.57587	0.0107037
	CH17-296N19.1	2.88095	0.0174883		PDCD1LG2	-4.11252	0.0108122
	SPTLC1P1	3.40343	0.017788		AQP1	-2.48915	0.0109439
	HRH3	1.56217	0.0178721		SLC30A4	-1.62241	0.0110027
	SERP2	1.69024	0.0180204		ECM1	-1.93307	0.0110032
	C16orf89	1.6019	0.0182207		NCKAP5	-1.81657	0.0111786
	MDK	1.57042	0.0183725		SLC16A7	-1.89936	0.0111875
	MT1E	1.87735	0.0186636		SPIRE1	-1.52073	0.0112314
	VIPR2	2.6274	0.0187227		SERPINA9	-4.43446	0.0112612
	C5orf46	1.78367	0.0187903		SCN9A	-1.62232	0.0112705
	PCDH8	2.37568	0.0188951		CD248	-1.61324	0.0114423
	AC243587.1	1.54098	0.0189766		ALDH1L2	-2.12174	0.0115351
	HMGN2P5	1.54098	0.0189766		SHC3	-1.95831	0.0115602
	ALOX15	1.67058	0.0198292		LGALS1	-1.61937	0.0116633
	SLC8A2	1.6846	0.0200236		CRLF1	-1.73362	0.0117241
	ISCA1P1	1.58978	0.0201971		LRRC15	-2.07971	0.0118014
	ADPRHL1	1.63364	0.0205188		LDLRAD4	-2.86204	0.0118933
	CCDC160	2.07404	0.0206538		SLC8A1	-2.46835	0.0119886
	TBX18	1.63337	0.0208583		KAZALD1	-1.73205	0.0121607
	JPH2	1.90733	0.021011		KLF9	-2.04271	0.0125251
	HTR1D	1.5617	0.0212506		DLG2	-1.76796	0.0125323
	ZIC1	2.11633	0.0213905		SH3RF3	-1.78908	0.0125401
	TRIM34	1.93194	0.0215074		CCL2	-2.5949	0.0125858
	WRBP1	1.51383	0.021641		CD109	-1.69682	0.0128038
	TMOD1	1.75741	0.0217383		RUNX2	-2.26644	0.0129983
	VWF	2.20025	0.0217644		ZNF204P	-1.5345	0.013639
	TMEM265	2.17279	0.021922		MUM1L1	-1.58153	0.0137839
	TNXB	1.97147	0.0219248		SEMA3A	-1.63789	0.013924
	SLC38A3	2.19694	0.0222134		C1QTNF1	-1.82826	0.0140274
	NKAIN4	1.63032	0.0224486		DND1	-2.10069	0.0140727
	MYO3B	2.47387	0.0228882		ANKRD1	-1.79761	0.0140883
	LTB	2.0359	0.0229286		GRIK2	-1.77253	0.0142862
	TACSTD2	2.4452	0.0231246		NMNAT3	-1.92681	0.0142948
	LFNG	1.52891	0.0234869		MCTP2	-1.65427	0.0145154
	HMX2	1.70881	0.024011		HIC1	-2.01874	0.0146462
	NRCAM	1.68065	0.0241113		METTL7A	-2.02286	0.0147602
	MTND2P28	1.60853	0.0246187		GPR68	-2.19869	0.0147677
	EIF4BP7	2.03128	0.0246972		TLCD2	-1.72111	0.0147936
	GJB5	1.88312	0.0247215		MAPK11	-1.55042	0.0150745
	GRM3	2.23269	0.0252642		TMEM119	-2.04347	0.0151395
	SP5	3.52118	0.0255748		TTC3	-1.72534	0.015191
	FAM71F1	1.85706	0.0258604		HHIP	-1.82912	0.0152208
	RP11-438J1.1	3.91958	0.0260308		EPS8	-1.84298	0.0153699
	LMO3	1.89182	0.0263912		CHMP4C	-1.52416	0.0156067
	KCNK10	1.82459	0.0270862		SERPINE1	-2.59546	0.0160266
	TRPV3	1.55406	0.0274687		DLX1	-3.26694	0.016219
	FNDC5	1.91762	0.0275691		HRH1	-2.33972	0.0167281
	GATA3	1.72727	0.0277594		MPP4	-2.38042	0.0168308
	SFN	2.2026	0.0280652		SLCO4C1	-1.82737	0.0168882
	NPPB	2.71559	0.0282204		AZIN2	-1.88225	0.0171701
	CYP26C1	4.03043	0.0284029		AC027612.6	-1.67125	0.0172363
	B3GNT3	2.02895	0.0284155		FAM35BP	-1.74657	0.0172534
	NFE2	1.79947	0.0285745		SP140L	-1.566	0.017432
	EFNB1	1.69062	0.0288846		MAML2	-1.55051	0.0175422
	SEMA6D	1.58999	0.0294582		CD302	-2.19484	0.0176034
	SDK2	1.90067	0.0298371		OAF	-1.52939	0.0178268
	ID2	1.60331	0.0315673		COL5A1	-1.58973	0.017998
	DUOX1	1.50835	0.0316439		CHST1	-1.98752	0.018084
	TMEM40	2.3167	0.0317068		IQGAP2	-1.51521	0.0184087
	LTB4R2	1.72539	0.0317256		FAM212A	-1.99855	0.0187569
	LIMCH1	1.80359	0.032285		HCLS1	-1.72609	0.0188101
	RPS3AP5	1.66887	0.0323665		ONECUT1	-2.13367	0.018845
	ARRDC3	1.93918	0.0324014		GRK5	-1.66891	0.0196656
	BOC	1.86386	0.032517		CH507-9B2.9	-1.76441	0.0198906
	RP1-37E16.12	3.64088	0.0326861		JAKMIP1	-2.2408	0.0199218
	DDIT4	1.94331	0.0329135		ABLIM2	-1.66711	0.0199926
	SMTNL2	1.58683	0.0330706		DCDC2	-1.60918	0.0200229
	CPNE5	1.79086	0.0336693		SCARF1	-1.69332	0.0203954
	FREM1	1.60428	0.0340875		TNFAIP6	-2.41127	0.0206034
	NGFR	1.69256	0.0341756		CDCP1	-1.51395	0.0206612
	ABHD14A-ACY1	2.13555	0.0344259		SYNC	-1.9727	0.0213471
	C1QL3	1.66405	0.0345734		IL6	-2.40365	0.0214711
	OCA2	1.77832	0.0346798		PPP2R2C	-1.6239	0.0216417
	STK32A	1.54495	0.0348307		ARHGEF28	-1.53213	0.0217062
	ANKRD37	1.89789	0.0354281		GNA14	-2.19677	0.0217297
	CITED2	1.65719	0.0385862		VAMP5	-2.05115	0.0221236
	DRD4	1.5129	0.0390092		GRIA4	-1.75253	0.0224324
	FGF17	2.19234	0.0402767		NR4A2	-1.55138	0.0224985
	RHCG	1.82258	0.0407722		PLSCR4	-1.66665	0.0230047
	UBXN10	1.91607	0.0413791		PAX8	-2.42049	0.0235381
	LY6K	1.50619	0.0415974		ITGB3	-3.71595	0.0236593
	CAMK1G	2.20099	0.0416344		ZFYVE28	-2.30345	0.0236683
	PDE1B	2.38046	0.0418147		PCDHGA3	-2.30237	0.0239408
	WNT2B	2.39094	0.0450064		HOXB2	-2.45914	0.0246551
	RP11-274B21.1	1.75078	0.0474262		STAMBPL1	-1.72489	0.0247952
	GRHL3	2.05467	0.049125		EGFLAM	-1.55769	0.0251308
	CFAP77	2.05111	0.0492215		LEFTY1	-3.70952	0.025143
	H2AFY2	1.53685	0.0497724		ELN	-2.09464	0.0254893
					DNAJC12	-1.50554	0.025643
					ARHGAP22	-1.55344	0.0257517
					CRIP2	-1.63182	0.0259291
					KLHL34	-1.81771	0.0266372
					MDN1	-1.7512	0.0269768
					RUNX1	-1.70133	0.0274602
					FAM91A3P	-1.80563	0.028189
					OR2A20P	-1.63898	0.0285706
					TRIM6-TRIM34	-4.3525	0.0295484
					LIF	-2.33771	0.0300107
					CER1	-1.86	0.0302423
					MEIS1	-1.76517	0.0305015
					PDK4	-2.34552	0.0309782
					2005-09-01	-1.57701	0.0310388
					ZNF25	-1.91121	0.0311306
					IDUA	-1.54668	0.0312183
					TBX2	-2.80018	0.0316549
					RAB17	-1.99716	0.0318531
					TRPA1	-1.75031	0.0318921
					ANGPT1	-1.78855	0.0319772
					PDCL3P4	-2.43544	0.0320469
					CHMP1B2P	-1.85609	0.0321599
					MICAL2	-2.31069	0.0322243
					NETO1	-1.87629	0.0322688
					GLIPR1	-2.17928	0.0324459
					TFCP2L1	-1.66518	0.0325213
					TM4SF1	-1.56274	0.0335398
					GPRIN3	-2.21691	0.0338402
					CD70	-1.8747	0.0343706
					ARSJ	-1.55326	0.0343953
					NODAL	-2.43671	0.0346779
					CCDC68	-1.66056	0.03474
					ZNF600	-1.53921	0.034828
					EMP1	-1.92128	0.0360781
					WISP1	-3.22877	0.0361368
					GJB2	-2.59411	0.0364133
					GOLGA6L4	-2.54295	0.0364747
					PTCHD4	-1.71371	0.0368795
					HAPLN1	-2.24519	0.0369015
					ADAMTS18	-2.5216	0.037277
					KCNIP1	-1.60798	0.0379441
					GTF2H2C_2	-2.3543	0.0381696
					NPY1R	-1.5379	0.0384892
					SIGLEC15	-3.26958	0.0386419
					NALCN	-1.52666	0.0386631
					NR5A2	-1.77153	0.0392265
					VDR	-1.70729	0.0401532
					AC093616.4	-1.51082	0.0406053
					KCNK3	-2.36364	0.0407219
					BTBD8	-1.72115	0.041031
					NANOG	-1.621	0.041149
					SPOCD1	-1.52289	0.0411601
					FGF8	-2.03916	0.0415833
					RP11-168P6.2	-2.87807	0.0425285
					MOG	-1.66963	0.0437255
					SPOCK3	-1.79485	0.0442837
					CES4A	-1.58352	0.0442841
					IFI16	-1.64636	0.0443325
					DOK6	-1.54122	0.0444754
					DPPA5	-1.75016	0.0451568
					SNAP25	-1.61729	0.0453202
					GDNF	-1.63249	0.0461528
					UNC5C	-1.86813	0.0465128
					CEMP1	-3.79283	0.0478014
					RARB	-1.65726	0.0479062

## Sheet: vs hAEC
	gene_symbol	logFC	P.Value		gene_symbol	logFC	P.Value
	LIN28A	12.8432	6.38751e-10		MFAP5	-5.90318	5.42228e-09
	FGFR1	6.48317	1.24085e-09		ANXA8L1	-5.89533	7.35516e-09
	ADD2	10.2461	1.37062e-09		DSC3	-5.13153	8.43931e-09
	ALPL	10.8624	1.40607e-09		OSR1	-6.60142	8.94819e-09
	TDGF1	13.5129	1.98467e-09		SNAI2	-4.75256	3.38087e-08
	SOX2	12.5389	2.76469e-09		SLC27A6	-4.72165	6.38569e-08
	CYP26A1	11.4149	2.95677e-09		C5orf46	-5.32504	6.44508e-08
	LECT1	11.403	3.48254e-09		ITGBL1	-5.27875	6.4995e-08
	CRABP1	10.6496	3.54185e-09		KCNMA1	-4.66197	6.58502e-08
	NR6A1	7.4533	3.54626e-09		GPNMB	-4.94028	7.39166e-08
	LARGE2	9.13124	3.97658e-09		VTCN1	-6.29488	7.93625e-08
	POU5F1	11.3164	4.26005e-09		PTGES	-4.47105	8.11915e-08
	SALL4	10.4733	4.32897e-09		WNT5A	-5.40484	8.55439e-08
	ZSCAN10	10.6613	4.66102e-09		ZBED2	-6.61201	8.66539e-08
	KIF1A	13.4333	6.98547e-09		ANXA8	-5.72716	9.86635e-08
	SBK1	7.74299	8.4156e-09		TBX18	-5.16221	9.87773e-08
	ZIC2	12.8417	1.14597e-08		SMPD1	-4.55936	1.11627e-07
	DCLK1	9.57784	1.23309e-08		KANK4	-4.83406	1.15979e-07
	FBN3	8.56892	1.47116e-08		MTMR11	-4.39353	1.20154e-07
	DPPA4	10.4979	1.53158e-08		MATN2	-3.99754	1.43589e-07
	RIMS4	10.428	1.79705e-08		IL1R1	-5.45028	1.45571e-07
	GLDC	11.0642	1.8214e-08		UNC13D	-4.38563	1.56703e-07
	IGLON5	9.69257	1.828e-08		CST6	-5.06409	1.63677e-07
	OTX2	12.3002	1.91875e-08		HSPB6	-4.63249	1.67352e-07
	IGSF1	9.0698	1.9913e-08		PRRT4	-5.11408	1.73842e-07
	RARRES2	10.4009	2.19839e-08		COPZ2	-5.02234	1.7535e-07
	SPP1	10.0683	2.20036e-08		PROM2	-4.74962	1.80312e-07
	VRTN	11.3398	2.3477e-08		SCEL	-6.05584	2.02938e-07
	RBPMS2	7.59732	2.39713e-08		NAALADL2	-5.03484	2.30707e-07
	CECR2	9.27192	2.48862e-08		LPCAT2	-4.43501	2.37064e-07
	PSAT1	5.14481	2.52499e-08		ENDOD1	-4.64326	2.37417e-07
	USP44	10.0928	2.56735e-08		PLEKHA2	-3.98107	2.45904e-07
	RGMA	5.93879	2.63687e-08		PDZK1	-5.47099	2.61009e-07
	TUBB2B	7.46329	2.92135e-08		C1QTNF6	-4.79518	2.68918e-07
	SEMA6B	10.3912	3.06729e-08		CERCAM	-4.85272	2.7606e-07
	ZIC3	10.0513	3.29242e-08		HAND1	-6.41389	2.80221e-07
	NRP2	6.26539	3.51321e-08		PAQR7	-3.50628	2.996e-07
	FZD5	6.82077	3.9002e-08		CCDC80	-5.17212	3.08132e-07
	JPH4	8.7318	4.01344e-08		IL22RA1	-4.3882	3.11219e-07
	GRIK5	8.21361	4.20971e-08		ADAM9	-3.89892	3.31176e-07
	CA14	6.90857	4.21207e-08		CAPS	-4.89233	3.67112e-07
	ENO2	7.53112	4.26395e-08		AGER	-4.05079	3.68675e-07
	DNMT3B	8.03436	4.40099e-08		CDH10	-6.33218	3.73067e-07
	HHLA1	7.73121	4.63931e-08		MPZL2	-4.11986	3.75303e-07
	PRDM14	9.18056	4.73118e-08		EPB41L3	-3.52196	3.90369e-07
	CAMKV	11.6872	4.78391e-08		RNF217	-3.69783	4.00387e-07
	SALL2	5.77678	4.80051e-08		ACSL1	-4.01002	4.0596e-07
	GCNT2	7.34196	4.90719e-08		ACKR2	-4.77341	4.144e-07
	COL11A1	8.61473	5.26906e-08		ADAMTS6	-5.70064	4.70633e-07
	CACNA1H	8.46999	5.69424e-08		PKP1	-4.87013	4.74038e-07
	CBS	6.51392	5.77279e-08		RHOBTB3	-4.3997	4.78541e-07
	PCYT1B	7.47312	6.1337e-08		FKBP9	-3.8714	4.82984e-07
	CACNG7	11.3635	6.18804e-08		DENND2D	-3.99902	5.01569e-07
	ARG2	6.58054	6.26734e-08		HAND2	-5.39996	5.05211e-07
	TUNAR	7.61903	6.50783e-08		MR1	-5.13935	5.06089e-07
	BMP7	6.84406	6.98189e-08		MAN2B2	-3.89629	5.0639e-07
	NKAIN1	6.44601	7.12374e-08		CD40	-4.08907	5.4976e-07
	PIPOX	6.08898	7.15579e-08		SP100	-4.4082	5.59531e-07
	NOVA2	9.56277	7.49787e-08		LYPD3	-4.26427	5.66555e-07
	ATP1B2	7.86302	8.66207e-08		FAM198B	-4.53085	5.72762e-07
	ID1	6.49976	8.91442e-08		SERPINB7	-6.35338	5.79506e-07
	REEP2	6.83082	9.00121e-08		TGM2	-5.22746	5.85902e-07
	PLEKHB1	8.92398	9.04663e-08		THRB	-4.37976	5.9647e-07
	GAP43	9.33263	9.35042e-08		SEMA5A	-4.71502	6.13664e-07
	SCAMP5	5.37957	9.44627e-08		AHNAK	-4.57795	6.44852e-07
	ZIC5	11.3626	9.69112e-08		DAPP1	-4.58876	6.60593e-07
	PPP1R1B	7.28696	9.69681e-08		IL17RC	-3.50448	6.68869e-07
	PTPRZ1	11.7232	9.74618e-08		EPAS1	-5.62912	7.11929e-07
	ATCAY	7.11606	9.81661e-08		PHLDB2	-4.74518	7.21332e-07
	CENPV	5.99197	9.88163e-08		THSD4	-3.36623	7.47515e-07
	FGFR4	5.15021	1.01168e-07		AGR2	-4.78697	7.86568e-07
	RAB3B	5.86387	1.02138e-07		A2ML1	-4.99479	8.07586e-07
	PKDCC	9.20028	1.04497e-07		ACKR3	-4.0345	8.40486e-07
	CARMIL2	8.21544	1.04556e-07		UPK3BL	-4.84219	8.87864e-07
	NELL2	7.88356	1.10861e-07		SEMA3C	-4.11856	9.02285e-07
	PDE9A	7.94156	1.14224e-07		ADGRG1	-3.97256	9.10822e-07
	HLA-DOA	7.82202	1.25719e-07		ANXA4	-3.32735	9.31761e-07
	FXYD6	9.47659	1.28488e-07		TOM1L2	-3.67064	9.53361e-07
	FGF2	8.36478	1.31104e-07		DUOXA1	-4.71693	9.60053e-07
	COL26A1	12.0191	1.31188e-07		LTBP3	-3.76704	1.03207e-06
	RND2	6.71682	1.3374e-07		PSD4	-4.37448	1.0367e-06
	DRAXIN	6.37171	1.34586e-07		UBASH3B	-3.588	1.05102e-06
	TUBB4A	9.62181	1.38386e-07		ATG9B	-4.99176	1.05112e-06
	PYGM	7.06861	1.436e-07		TGFBI	-5.08524	1.05601e-06
	RCOR2	3.77866	1.56769e-07		CDSN	-4.49209	1.07394e-06
	FAM60A	4.16675	1.6252e-07		COL17A1	-5.1857	1.10079e-06
	SOX3	10.662	1.75e-07		CLMN	-3.47903	1.10132e-06
	NRARP	9.14368	1.77764e-07		GALNT5	-4.40288	1.12949e-06
	ABHD12B	7.6102	1.82549e-07		HNRNPA1P33	-6.72567	1.15178e-06
	NMRK2	11.749	1.89278e-07		KIAA0513	-4.12378	1.15533e-06
	2003-09-01	7.0475	1.95962e-07		ITIH5	-3.23327	1.17474e-06
	SLC7A3	12.0299	2.1834e-07		MSLN	-5.3999	1.24362e-06
	B3GAT1	8.71567	2.18858e-07		HACD4	-3.86555	1.29506e-06
	PREX1	8.65736	2.24625e-07		GPR85	-4.95375	1.30116e-06
	MATK	8.50475	2.45022e-07		CEMIP	-6.31177	1.31481e-06
	ATP1A2	10.5236	2.52505e-07		TRADD	-4.0864	1.58348e-06
	ZNF423	4.34334	2.65143e-07		CTSZ	-2.98813	1.64743e-06
	C16orf45	7.3962	2.67636e-07		LAMC2	-4.89891	1.67775e-06
	SERPINB9	9.03747	2.69125e-07		GRHL2	-3.17983	1.73349e-06
	TJP3	5.96251	2.69198e-07		CD109	-4.61168	1.80384e-06
	CD200	9.34557	2.97464e-07		C8orf4	-3.95925	1.86319e-06
	GYG2	4.71259	3.07006e-07		RIPK3	-5.84089	1.88672e-06
	BEX1	8.36363	3.11743e-07		SCARA3	-4.44278	2.03091e-06
	PRR36	5.01992	3.15039e-07		B3GNT3	-4.07985	2.04288e-06
	KCNQ2	8.56238	3.28798e-07		ITGB4	-4.76674	2.07204e-06
	SLAIN1	10.245	3.33829e-07		P2RY6	-4.3248	2.10388e-06
	FEZF1	10.8297	3.37224e-07		RP11-807H22.6	-6.1535	2.14026e-06
	CLDN3	7.69406	3.37737e-07		TIMP2	-3.46703	2.14542e-06
	COL18A1	5.51379	3.49129e-07		TES	-3.6165	2.18238e-06
	TP53I11	9.82999	3.52922e-07		PLSCR5	-5.29618	2.24283e-06
	FRZB	7.55866	3.63556e-07		RASGRF1	-4.9852	2.28235e-06
	HES3	10.3973	3.65406e-07		MUC16	-5.5646	2.29596e-06
	FOXA3	6.28318	3.76812e-07		RP11-61L23.2	-4.42686	2.30545e-06
	PAMR1	7.71824	3.79585e-07		MET	-3.87698	2.3245e-06
	FAM124A	6.52433	4.13511e-07		FUCA1	-3.44045	2.34663e-06
	LRRC8B	6.57711	4.18118e-07		FAM46A	-4.05063	2.36658e-06
	DASS-161H22.6	10.1233	4.27818e-07		PSG5	-5.96486	2.37976e-06
	NTS	11.2216	4.36172e-07		STIM1	-3.1524	2.39067e-06
	PDZD4	7.89613	4.61671e-07		NEDD9	-3.28748	2.39098e-06
	KIF17	6.33499	4.67747e-07		PRSS23	-4.08887	2.39823e-06
	KCNK5	5.5464	4.81055e-07		CD59	-4.38509	2.40712e-06
	TTYH1	5.25935	4.89306e-07		NECTIN4	-3.76985	2.42e-06
	MYEF2	7.06201	5.06884e-07		2008-09-01	-2.78618	2.42792e-06
	PLP1	6.76918	5.08716e-07		NIPAL2	-3.97237	2.4382e-06
	JPH3	8.87883	5.09453e-07		CAT	-5.42477	2.4627e-06
	LHFPL4	10.0121	5.30487e-07		LHFP	-3.41016	2.46973e-06
	SOX21	10.726	5.42956e-07		BLNK	-4.77135	2.47869e-06
	FOXI3	7.53385	5.47607e-07		ATP2B4	-3.33543	2.53978e-06
	TSPAN18	10.3076	5.48888e-07		P4HA2	-3.48528	2.55904e-06
	BEND4	10.5053	5.57122e-07		CAPN2	-3.1898	2.59529e-06
	PSIP1	4.2732	5.57643e-07		TMEM173	-4.03216	2.61284e-06
	KIF21B	6.02565	5.70815e-07		SSFA2	-3.96547	2.61692e-06
	DBNDD1	7.04591	5.73533e-07		GBP3	-5.25132	2.65267e-06
	COL9A1	7.71451	6.10667e-07		SYTL1	-3.81058	2.70996e-06
	RPRM	8.23051	6.24652e-07		THBS3	-3.53038	2.77947e-06
	SERPINF1	5.07746	6.30087e-07		MELTF	-4.35687	2.83671e-06
	SALL1	11.1335	6.3161e-07		COL4A5	-3.43274	2.86731e-06
	KLHL23	5.2324	6.3729e-07		ABHD15	-3.6216	3.00538e-06
	SCNN1A	6.53215	6.41051e-07		ATP10D	-3.77043	3.10131e-06
	ARID3B	4.29626	6.57049e-07		VWA5A	-3.00843	3.11754e-06
	ABCA3	5.65893	6.64415e-07		ADAMTS2	-3.78263	3.14137e-06
	RASL11B	9.51666	6.68471e-07		WNT6	-4.25393	3.16487e-06
	CCDC88C	6.94456	6.68739e-07		GAS6	-3.68083	3.18926e-06
	TBL1X	4.364	6.72576e-07		SDR42E1	-4.63636	3.19391e-06
	SMPDL3B	5.83661	6.73938e-07		HFE	-4.10936	3.27251e-06
	KIF5C	8.75721	6.90183e-07		MXRA7	-3.08912	3.3423e-06
	FADS2	3.41568	6.94855e-07		THNSL2	-4.07643	3.34369e-06
	OLFM2	8.79582	6.95417e-07		CLIC3	-5.09053	3.36433e-06
	GPM6B	6.41752	7.25911e-07		USP40	-2.94504	3.37045e-06
	NPTX1	8.40476	7.31746e-07		MUC20	-4.31543	3.39195e-06
	PLTP	3.79724	7.36552e-07		PPP1R14C	-4.29476	3.39358e-06
	APELA	7.97205	7.40008e-07		CRISPLD2	-4.76299	3.41561e-06
	PDXP	5.52032	7.67501e-07		MOXD1	-3.47135	3.44611e-06
	LOXL3	5.50979	7.98934e-07		PIK3IP1	-4.19989	3.55433e-06
	PHGDH	3.48748	8.06238e-07		SPTLC3	-3.59282	3.61e-06
	SORL1	7.60495	8.10696e-07		PORCN	-3.62337	3.6191e-06
	CNTNAP2	9.97813	8.15163e-07		TK2	-3.06805	3.64892e-06
	FAM131B	4.14903	8.53019e-07		APBB1IP	-4.38492	3.72751e-06
	IDO1	9.11136	8.56877e-07		FBXL8	-4.79336	3.72997e-06
	CHST4	8.26212	8.76502e-07		XG	-4.80934	3.76167e-06
	FSD1	8.02022	8.88442e-07		PKP3	-3.51342	3.8331e-06
	CERS1	6.56199	9.23097e-07		COX7A1	-4.80419	3.92982e-06
	F2R	6.09863	9.49082e-07		SLC30A4	-4.12783	3.93233e-06
	MSI1	6.14758	9.703e-07		GOLGA8N	-4.79941	3.95448e-06
	KIT	9.78855	9.82281e-07		RDH10	-3.47775	3.96962e-06
	RASL12	8.17904	9.91501e-07		EGFR	-3.6716	4.01596e-06
	PREX2	8.53181	9.94577e-07		ARSD	-3.52258	4.04213e-06
	PELI2	9.77725	1.00811e-06		EPN3	-3.46791	4.05129e-06
	SCGB3A2	6.79003	1.04725e-06		LPAR5	-4.94669	4.06203e-06
	JAKMIP2	6.69947	1.05632e-06		MEIS1	-5.12373	4.06666e-06
	NOTCH3	9.14564	1.06131e-06		ZNF541	-6.07635	4.08092e-06
	TERT	9.53371	1.06817e-06		GALNT6	-4.38039	4.10783e-06
	FOXD3	9.5536	1.07166e-06		GSN	-3.52251	4.11005e-06
	WNK2	7.5088	1.08954e-06		TP53I3	-2.87043	4.16952e-06
	PPP1R1A	8.49946	1.09334e-06		TTC22	-3.71652	4.23707e-06
	NRXN2	7.61115	1.10761e-06		CTSO	-3.65568	4.3053e-06
	CBX2	4.15904	1.13423e-06		ZNF736	-5.67013	4.32189e-06
	FAM19A5	6.80434	1.13694e-06		DKK3	-4.59534	4.5423e-06
	COL5A3	8.25533	1.14404e-06		TCAF2	-4.14418	4.62674e-06
	NUP210	7.73459	1.15067e-06		FBLN7	-3.89123	4.63277e-06
	JAM3	5.82814	1.15283e-06		CTSB	-3.63999	4.66012e-06
	ZNF589	3.79825	1.1655e-06		MPZL3	-3.48243	4.6863e-06
	CADPS	7.77359	1.18389e-06		SLC22A5	-3.54843	4.7571e-06
	CRMP1	3.73724	1.18748e-06		KISS1	-5.90839	4.7966e-06
	CRB2	9.98432	1.19533e-06		ADCY7	-3.78103	4.80881e-06
	CXADR	6.77849	1.19688e-06		MXRA8	-3.3441	4.89587e-06
	SPRY1	7.71502	1.24268e-06		PARP3	-3.67946	4.99338e-06
	GRPR	10.219	1.26612e-06		NID2	-3.88121	5.03585e-06
	KNDC1	6.47072	1.26659e-06		FAM83A	-4.00808	5.10361e-06
	CRYM	7.63483	1.32303e-06		PCSK6	-3.08851	5.11155e-06
	C9orf135	9.99047	1.32997e-06		CSF2RB	-4.7269	5.2538e-06
	DPYSL5	8.18665	1.3719e-06		UBL3	-3.26561	5.28042e-06
	NGFR	7.6042	1.38626e-06		PPIC	-3.76513	5.45262e-06
	NUDT11	3.89786	1.39122e-06		EXTL1	-3.9591	5.513e-06
	OGDHL	5.18	1.42276e-06		SDC3	-3.22695	5.54028e-06
	GDAP1L1	8.11459	1.43821e-06		ALDH3B1	-4.34101	5.65459e-06
	CHN1	5.26863	1.47118e-06		TMEM105	-4.83218	5.7354e-06
	PROM1	9.80817	1.48028e-06		IGFBP3	-4.90632	5.75002e-06
	TMSB15A	4.87779	1.54256e-06		RAB27B	-3.96778	5.80368e-06
	LRP2	7.60037	1.56683e-06		SLC30A2	-4.74097	5.83424e-06
	FAM69B	3.91252	1.57027e-06		SMCO3	-5.96141	5.86043e-06
	MFHAS1	4.55616	1.59755e-06		MPZL1	-2.67641	5.90829e-06
	KCNH2	8.03428	1.61131e-06		KCNN4	-3.90799	6.02496e-06
	ADAM23	7.89656	1.61616e-06		FAM110B	-2.90786	6.02902e-06
	SMIM10L2A	5.56516	1.61971e-06		PTPN3	-3.83698	6.05629e-06
	SORBS1	6.38786	1.62027e-06		RNASEL	-3.81925	6.07357e-06
	E2F5	3.57161	1.62611e-06		ARSA	-3.20291	6.15233e-06
	ADAMTS19	8.07345	1.63382e-06		NT5E	-4.2182	6.21381e-06
	LRRK1	6.26685	1.63554e-06		GPR1	-4.05161	6.34294e-06
	SLC16A9	4.9078	1.65819e-06		ALPK1	-4.15231	6.37093e-06
	ZFR2	6.20535	1.702e-06		TEX2	-3.83835	6.39619e-06
	MARC1	4.38353	1.71276e-06		ATXN1	-3.70988	6.42419e-06
	NLGN4X	8.88035	1.72285e-06		CHD3	-2.76847	6.54346e-06
	SLC43A1	6.02464	1.74984e-06		HERPUD1	-3.0538	6.6062e-06
	MYOZ3	7.27457	1.75902e-06		SLC16A4	-3.8613	6.664e-06
	VWDE	9.34245	1.78332e-06		CMAHP	-7.41103	6.69213e-06
	CADM3	9.3336	1.79429e-06		C6orf89	-2.47642	6.8397e-06
	NANOG	6.92473	1.81423e-06		SIL1	-3.21011	6.93374e-06
	TRIM71	4.62154	1.81447e-06		MYOF	-3.10329	7.10942e-06
	TSSC2	4.00625	1.82538e-06		GATA3	-4.23362	7.14736e-06
	RBPMS	3.30404	1.83875e-06		LIPA	-2.66115	7.16277e-06
	FIGNL2	9.26799	1.86228e-06		SUMF1	-3.06702	7.20439e-06
	LYPD1	8.04437	1.87478e-06		TSPAN1	-5.80644	7.24229e-06
	UNC5A	9.24111	1.87677e-06		LRP10	-3.29656	7.24638e-06
	GREB1	5.9948	1.90222e-06		B2M	-3.41345	7.25475e-06
	GALNT8	7.84829	1.91421e-06		KRT16	-4.50293	7.29142e-06
	COCH	6.38404	1.91473e-06		ITGB6	-4.88703	7.33499e-06
	HEPH	6.24861	1.93952e-06		AHNAK2	-5.19088	7.34353e-06
	GRID2	9.38249	1.97476e-06		B4GALT1	-2.98105	7.43383e-06
	SNRPN	3.39658	1.9888e-06		UPK3B	-3.23855	7.44401e-06
	RTN4RL2	5.30934	1.99704e-06		ST3GAL1	-3.58647	7.60167e-06
	COBL	6.05294	2.03114e-06		GNS	-2.50017	7.6731e-06
	VIL1	7.83622	2.03604e-06		GJB5	-4.08887	7.6829e-06
	UGT3A2	8.14316	2.05806e-06		MFSD1	-3.15505	7.71501e-06
	EPHX3	4.98081	2.09056e-06		ADCY4	-4.92889	7.73409e-06
	SLC29A1	4.28221	2.09233e-06		LGALS3	-4.0296	7.86934e-06
	ST6GAL1	5.87108	2.11007e-06		SLITRK6	-5.55196	7.899e-06
	BCAM	4.64444	2.13876e-06		SFXN3	-3.32804	7.96566e-06
	STAT5B	2.99302	2.17126e-06		FAM114A1	-3.27281	8.0191e-06
	VASH2	6.36351	2.18337e-06		ZNF441	-5.13101	8.07558e-06
	AFF2	6.78033	2.20835e-06		AGR3	-4.25317	8.09546e-06
	SYT13	7.20006	2.22201e-06		C15orf52	-4.90663	8.21021e-06
	ATP1A3	6.58144	2.23962e-06		NIPAL3	-3.06641	8.22136e-06
	SMOC1	5.70792	2.25328e-06		TNXB	-5.50309	8.25652e-06
	NEFL	9.64923	2.26215e-06		CHPF	-3.38728	8.49427e-06
	ARFGEF3	6.93432	2.27245e-06		LAPTM5	-4.71132	8.62068e-06
	TCF7L1	3.25964	2.2761e-06		TMTC2	-3.50386	8.77635e-06
	ITGA7	5.54632	2.28715e-06		INHA	-4.30082	8.81908e-06
	GAL3ST3	9.53839	2.2928e-06		MARVELD1	-2.5205	8.91533e-06
	RASGRP2	9.30968	2.32783e-06		ECM1	-4.20721	9.03333e-06
	IGSF21	9.26731	2.35222e-06		LAMP2	-2.37665	9.05106e-06
	THBS4	4.11188	2.46157e-06		FBXO32	-3.86217	9.11261e-06
	NKX1-2	8.16235	2.5043e-06		TLCD2	-4.15967	9.28951e-06
	DLK1	7.45935	2.51946e-06		NR2F2	-3.6111	9.28988e-06
	WBSCR17	6.75566	2.54599e-06		SRC	-2.77338	9.30817e-06
	TMTC1	6.31497	2.55153e-06		SDC1	-3.33266	9.3773e-06
	CPT1C	3.54462	2.55895e-06		DOK4	-2.34818	9.48456e-06
	N4BP3	4.78965	2.65758e-06		ZBTB38	-3.03695	9.56883e-06
	SV2A	3.75485	2.66502e-06		CRIM1	-3.04688	9.58737e-06
	ZNF219	3.02195	2.687e-06		CDKN1A	-3.09465	9.62809e-06
	AP1S2	3.90243	2.70879e-06		FBN1	-5.11985	9.70969e-06
	GNG2	7.18721	2.71676e-06		IL1RL2	-5.14917	9.71987e-06
	CPXM1	7.67568	2.72927e-06		P2RY2	-3.96337	9.83392e-06
	NUDT10	7.64497	2.75086e-06		GBA	-2.9344	9.92569e-06
	GPR27	6.34993	2.79311e-06		COL16A1	-3.69495	9.93936e-06
	HS6ST2	6.279	2.79886e-06		BNIPL	-3.9635	1.00477e-05
	IQGAP2	9.83689	2.81539e-06		ARNTL	-4.03363	1.01145e-05
	KCNN2	6.11979	2.85637e-06		KIAA1614	-3.16367	1.01664e-05
	SLC7A8	3.87681	2.86047e-06		ZNF436	-3.72009	1.01987e-05
	LRRC4B	5.8258	2.87754e-06		SLC44A3	-2.94862	1.02515e-05
	UNC13A	7.50908	2.93881e-06		TACC1	-2.82906	1.02565e-05
	CCM2L	7.61863	2.94181e-06		TYMP	-3.5184	1.03849e-05
	KCNN1	7.0909	2.9798e-06		DUOX1	-3.64363	1.04431e-05
	PRKAR2B	5.47341	2.98235e-06		CEACAM19	-3.6364	1.04449e-05
	FAM57B	5.69386	3.04181e-06		SELPLG	-4.88261	1.0445e-05
	CDCA7L	4.07214	3.05001e-06		PLP2	-3.0733	1.04854e-05
	ACTN3	7.16544	3.10328e-06		MDFIC	-2.99311	1.05493e-05
	SLC6A8	3.61836	3.10898e-06		TINAGL1	-3.40247	1.05589e-05
	HAS3	6.55384	3.15054e-06		BMP1	-4.23644	1.05677e-05
	SMOC2	7.8111	3.17918e-06		HIST1H2BK	-3.31437	1.06651e-05
	LZTS1	7.14098	3.21884e-06		ADAMTSL4	-3.68335	1.06801e-05
	DUSP6	5.40943	3.25976e-06		ABAT	-2.70919	1.08501e-05
	SMIM24	7.65151	3.32723e-06		PID1	-3.49718	1.08565e-05
	GFPT2	6.53759	3.3478e-06		SMPDL3A	-3.93199	1.09212e-05
	LRIG1	4.89143	3.36593e-06		PDE4D	-2.9668	1.09572e-05
	GPR160	7.18896	3.4291e-06		AMOTL1	-2.70405	1.10072e-05
	HEY2	9.46703	3.4623e-06		FBLN2	-2.93499	1.11047e-05
	PRKCG	7.04014	3.46451e-06		C4orf19	-5.06921	1.11466e-05
	LIN28B	9.19636	3.52651e-06		GALNT15	-5.29819	1.12718e-05
	SNAI1	5.64654	3.54828e-06		CROT	-3.41988	1.13461e-05
	CACNA1B	6.13146	3.5503e-06		AMPD3	-2.97403	1.13935e-05
	LHX5	5.20825	3.58268e-06		WNT9A	-4.1149	1.1429e-05
	FGD5	6.3298	3.60032e-06		TMEM25	-2.49126	1.15191e-05
	KIAA1211	9.08278	3.64471e-06		LNPEP	-3.42886	1.15631e-05
	DAB1	8.85091	3.72256e-06		ADAMTS7P3	-5.9281	1.15862e-05
	FGF13	4.18949	3.73873e-06		PERP	-2.52674	1.1913e-05
	TMEM200A	5.63667	3.73909e-06		ASAP2	-3.24511	1.20011e-05
	TRPM3	5.92138	3.75489e-06		ALDH1A3	-3.61241	1.20096e-05
	CLDN19	7.52525	3.82871e-06		CCDC92	-3.34685	1.21984e-05
	APBA2	5.05977	3.84909e-06		IDUA	-3.89676	1.22282e-05
	CDH13	5.36952	3.85688e-06		ZFP42	-4.38477	1.22282e-05
	RASL10B	7.30409	3.85788e-06		TINCR	-3.89662	1.22347e-05
	NEFM	9.26152	3.95641e-06		ADGRG6	-3.85376	1.22841e-05
	DDIT4L	7.15048	3.98851e-06		AC009237.8	-4.81304	1.23328e-05
	RIMKLA	6.74506	4.00291e-06		KAT2B	-3.56846	1.24499e-05
	ECEL1	6.61219	4.01868e-06		PDE10A	-3.41152	1.24743e-05
	RGS5	4.81723	4.05723e-06		CALHM2	-3.00113	1.27114e-05
	CHST8	5.21102	4.0986e-06		SETD7	-2.74387	1.28082e-05
	FAM155B	7.19226	4.14392e-06		PLAGL1	-3.59723	1.29622e-05
	DNAH14	3.85658	4.14889e-06		TRIM63	-7.02673	1.30043e-05
	PDCD2L	3.63038	4.22721e-06		TMCO4	-3.01543	1.30851e-05
	PLS1	4.84786	4.43346e-06		PADI1	-4.47492	1.32147e-05
	CYP2S1	6.42202	4.44743e-06		ADAMTSL5	-4.03174	1.32574e-05
	PACSIN1	6.0324	4.59717e-06		NBPF15	-2.91864	1.33364e-05
	UTF1	8.92641	4.62918e-06		DPYD	-4.30737	1.34383e-05
	PPM1E	7.44842	4.63833e-06		S100A14	-4.19499	1.3495e-05
	TMEM35A	6.926	4.68968e-06		MFAP3L	-3.70504	1.36784e-05
	CALB1	5.75651	4.73401e-06		CPXM2	-3.21048	1.39252e-05
	ADAMTS16	6.0611	4.83293e-06		AC027612.6	-4.40257	1.39898e-05
	AASS	6.20135	4.88807e-06		COL12A1	-4.50286	1.40207e-05
	RP11-10O17.1	3.29894	4.97797e-06		CCDC89	-7.83736	1.40406e-05
	LRAT	7.65893	5.18729e-06		RIN2	-3.06557	1.40715e-05
	PALD1	6.54618	5.24081e-06		BEGAIN	-3.55287	1.41588e-05
	GLT1D1	7.08728	5.26803e-06		PPP1R13B	-2.89486	1.42295e-05
	MPP2	3.49081	5.39213e-06		WNT11	-4.2382	1.42492e-05
	TSPAN33	6.75293	5.39864e-06		CDC42BPG	-2.75138	1.44471e-05
	PMEL	3.49639	5.43935e-06		CCDC57	-2.59828	1.44489e-05
	NSUN7	3.44957	5.5414e-06		SPEG	-2.42404	1.53006e-05
	MYCN	4.70477	5.61814e-06		FAM134B	-3.36049	1.55284e-05
	CTNNA2	7.81579	5.62091e-06		SYNE3	-4.18137	1.55524e-05
	FOXH1	7.56413	5.65921e-06		BACE2	-2.75167	1.58015e-05
	AR	6.89502	5.74782e-06		HRASLS2	-5.3105	1.60201e-05
	GAL	7.41448	5.75691e-06		GRAMD2	-5.54989	1.61754e-05
	PTPN5	7.41388	5.77414e-06		GATA2	-3.91218	1.62658e-05
	CACHD1	10.4125	5.83277e-06		METTL7A	-4.54421	1.63627e-05
	NLGN3	4.27196	5.88014e-06		CALCOCO1	-2.79488	1.65338e-05
	IGSF9B	7.625	5.92275e-06		NAAA	-3.61422	1.65428e-05
	CCKBR	6.71442	5.96955e-06		EVPL	-4.31282	1.65785e-05
	FLT1	5.51659	5.98962e-06		C17orf107	-2.86733	1.67037e-05
	FADS1	2.63481	5.99255e-06		AC104532.2	-4.50372	1.67412e-05
	SCN4A	8.4921	6.08044e-06		NALCN	-4.4651	1.68134e-05
	TMEM125	5.89187	6.18285e-06		NYNRIN	-2.51767	1.68714e-05
	PMAIP1	5.49826	6.19694e-06		RAI1	-3.11082	1.70638e-05
	PLCH1	7.94529	6.25741e-06		AFAP1L2	-3.08743	1.73786e-05
	ADAMTS4	4.61771	6.31405e-06		SH3RF2	-3.94072	1.7454e-05
	ASNS	3.27666	6.51207e-06		LYST	-3.50266	1.74722e-05
	NAT8L	6.17083	6.52199e-06		MLLT6	-3.05555	1.76102e-05
	ZDHHC22	9.36201	6.58136e-06		JOSD2	-3.77965	1.76983e-05
	PARP1	2.9778	6.60082e-06		ST8SIA4	-5.09903	1.77943e-05
	RHBDL3	6.97602	6.62893e-06		TH	-5.80989	1.79078e-05
	EPDR1	8.45016	6.64998e-06		PGRMC2	-2.45683	1.79477e-05
	PCSK9	4.04661	6.73545e-06		DGKA	-2.48075	1.80494e-05
	RET	6.15836	6.73614e-06		TSPO	-2.89521	1.82277e-05
	ESPN	5.85425	6.83079e-06		TSHZ1	-3.83145	1.82731e-05
	KCNG3	8.79038	6.91652e-06		POF1B	-5.53899	1.84457e-05
	COL23A1	6.87448	6.92962e-06		TBC1D9	-2.95471	1.84947e-05
	UST	4.3848	6.94678e-06		EHBP1L1	-2.8848	1.85233e-05
	PFAS	3.97178	6.97559e-06		ZNF528	-5.04133	1.87713e-05
	B3GALT1	7.47549	6.98949e-06		EVA1A	-3.45698	1.90801e-05
	LARP7	2.99163	7.01401e-06		GRAMD3	-2.95774	1.92326e-05
	CKB	3.80906	7.13144e-06		TMEM154	-3.27833	1.9269e-05
	FST	6.80162	7.21863e-06		KRT14	-4.32127	1.9489e-05
	TFAP4	3.34793	7.29175e-06		SUSD1	-3.12299	1.95132e-05
	LSAMP	5.19303	7.30879e-06		SGMS2	-3.69821	1.97256e-05
	CACNA2D2	2.96571	7.33626e-06		BAG3	-2.32539	2.04685e-05
	DLGAP1	6.9	7.43545e-06		TBC1D2B	-2.28918	2.05649e-05
	COL13A1	7.31242	7.74454e-06		CTSA	-2.91469	2.06501e-05
	IL17RD	3.97984	7.74463e-06		PDZRN3	-3.43433	2.07946e-05
	TERF1	3.74358	7.75481e-06		TANC2	-3.05322	2.08237e-05
	WSCD1	7.85481	7.76808e-06		IL36RN	-5.12077	2.1331e-05
	KIF5A	5.63053	7.78422e-06		ALDH3B2	-5.13934	2.14748e-05
	ECEL1P1	8.37749	7.79483e-06		EFEMP2	-3.17523	2.17335e-05
	FEZ1	4.00738	7.80655e-06		CORO6	-2.99707	2.17521e-05
	OLIG3	8.60706	7.84831e-06		KLK5	-3.7558	2.18535e-05
	WIPF3	4.0892	7.88882e-06		GNA15	-3.3046	2.1902e-05
	HTR3A	8.34803	7.98233e-06		ANXA1	-3.07533	2.19833e-05
	SP8	8.53435	8.02875e-06		ABCA12	-4.56887	2.22539e-05
	PGBD5	5.9664	8.06849e-06		PSORS1C1	-4.1576	2.2298e-05
	PIM1	3.98107	8.20986e-06		CYP26B1	-4.89606	2.23331e-05
	2006-09-01	3.83348	8.22995e-06		ABCA1	-3.63191	2.24933e-05
	SCG5	6.03143	8.25667e-06		DDR2	-3.63975	2.25766e-05
	VRK1	3.09537	8.26157e-06		CHMP4C	-3.6125	2.27917e-05
	GREM1	6.09144	8.34056e-06		ASAH1	-2.37008	2.31258e-05
	TYRO3	2.67769	8.35881e-06		CD47	-2.21771	2.31729e-05
	SLC8A2	5.41058	8.45387e-06		HTRA3	-3.50974	2.32777e-05
	RND1	5.35503	8.4604e-06		GLB1L	-3.54968	2.34624e-05
	MAST1	4.50525	8.46385e-06		CSF1R	-3.60682	2.35409e-05
	TEAD2	3.04953	8.51914e-06		CRELD2	-2.34067	2.35454e-05
	PIM2	4.83849	8.54924e-06		LOXL4	-2.97007	2.35605e-05
	RNF157	3.97571	8.55725e-06		SLC40A1	-4.92915	2.35675e-05
	GPR19	5.90254	8.57047e-06		ANKH	-3.22104	2.37142e-05
	TOX	4.54005	8.61566e-06		BMT2	-2.96344	2.38649e-05
	LEF1	7.19951	8.66407e-06		LPIN3	-3.09903	2.41776e-05
	LBR	3.11323	8.67537e-06		MINA	-2.76939	2.41781e-05
	RNF138	2.86404	8.68223e-06		ACAA1	-2.51528	2.41933e-05
	MYBPC2	5.6958	8.81457e-06		SPNS2	-3.15508	2.43923e-05
	NECAB2	7.83588	8.83602e-06		GJA5	-5.20142	2.44035e-05
	PCOLCE2	6.11759	8.90432e-06		KCNK6	-2.51082	2.44837e-05
	CHEK2	2.77923	8.93684e-06		ZBTB47	-3.58667	2.47917e-05
	NCAN	7.41394	9.06489e-06		TTLL3	-3.01808	2.49042e-05
	HDAC9	5.98801	9.21344e-06		HGSNAT	-2.70397	2.50643e-05
	SYT2	7.49746	9.21401e-06		ART4	-4.73945	2.5204e-05
	LINC00371	8.38765	9.21557e-06		ACSS1	-3.49487	2.52622e-05
	ASPHD1	4.12147	9.25212e-06		GABRP	-3.93538	2.52802e-05
	CHRNA7	5.94644	9.44412e-06		CTHRC1	-3.19769	2.56044e-05
	CER1	8.91164	9.54949e-06		PITPNM2	-2.76573	2.56491e-05
	WFIKKN1	7.52434	9.65664e-06		TAPBP	-2.72393	2.56528e-05
	RRAGD	3.83399	9.67853e-06		KRT24	-6.88148	2.575e-05
	UGT8	4.87599	9.70355e-06		CLCA2	-5.25064	2.5855e-05
	SPON1	4.59318	9.96774e-06		FAM49A	-2.76923	2.58769e-05
	SYN3	3.79817	1.00009e-05		PCDH9	-4.52671	2.59404e-05
	RRAS2	2.61397	1.01386e-05		CRTC3	-2.62459	2.60041e-05
	MSANTD3-TMEFF1	4.73416	1.03226e-05		ITPRIPL2	-3.06717	2.60088e-05
	PIANP	5.06378	1.03351e-05		LIPH	-4.63902	2.62695e-05
	MEGF10	5.2605	1.03364e-05		GSTK1	-2.71319	2.66426e-05
	CLDN6	6.12466	1.04068e-05		ZHX1	-2.72315	2.67095e-05
	TESC	8.28426	1.04439e-05		TNNT3	-4.25733	2.68824e-05
	LINGO1	4.84823	1.0528e-05		ELF1	-2.51435	2.69529e-05
	PHF21B	8.62374	1.06209e-05		PRSS22	-3.54114	2.71224e-05
	SDK2	7.80866	1.06659e-05		SMARCA2	-3.05411	2.72579e-05
	FZD7	3.60068	1.06828e-05		TTC7A	-2.22724	2.75981e-05
	SOX10	7.83863	1.07089e-05		MXRA5	-4.92922	2.7799e-05
	AXIN2	3.20092	1.08035e-05		SIAE	-2.45755	2.79913e-05
	CHRDL1	8.45075	1.0812e-05		TEX264	-2.55017	2.82327e-05
	BEND3	3.7904	1.0985e-05		RAB40B	-3.09826	2.84428e-05
	GRM4	6.48188	1.1134e-05		TCP11L1	-2.42695	2.84778e-05
	ADCYAP1R1	8.72011	1.11522e-05		ORAI3	-2.43889	2.85222e-05
	SIX3	6.67921	1.12365e-05		HOXA3	-4.76508	2.8708e-05
	NAP1L2	7.09641	1.13472e-05		LAMB1	-2.64271	2.87492e-05
	STK26	3.06684	1.14459e-05		LAMB3	-4.46657	2.8832e-05
	HRH3	8.27932	1.14484e-05		RNASE4	-3.35606	2.91703e-05
	BSPRY	4.92121	1.1453e-05		MBNL2	-3.99556	2.94824e-05
	ADGRV1	6.95712	1.15038e-05		CAV2	-3.56659	2.98571e-05
	TNFRSF8	5.67743	1.15195e-05		ABLIM3	-4.71395	2.99127e-05
	TSGA10IP	8.27198	1.15731e-05		GALNS	-2.49554	3.00521e-05
	ADCY2	5.23081	1.15825e-05		CTIF	-2.96973	3.01731e-05
	TCEAL2	7.05355	1.16805e-05		CASP4	-4.48677	3.02239e-05
	POLR3G	4.84797	1.17222e-05		ACSF2	-2.64609	3.05405e-05
	FGFBP3	4.6667	1.17245e-05		TIMP3	-4.41433	3.09389e-05
	DPEP3	8.26997	1.18326e-05		PLD1	-3.17397	3.10515e-05
	MID1IP1	2.90235	1.19526e-05		RRAGB	-2.61982	3.12481e-05
	MOCS1	6.91112	1.20118e-05		KRT15	-4.69091	3.13041e-05
	KCNT2	8.36223	1.21109e-05		SYCP2	-6.30422	3.15661e-05
	GABRQ	8.79362	1.21321e-05		PLA2G4F	-4.13017	3.15739e-05
	RUVBL1	2.29904	1.2308e-05		VWA7	-3.91696	3.17849e-05
	KLHDC8A	6.8688	1.2395e-05		MYLK	-3.20944	3.18065e-05
	GLS2	6.09359	1.25226e-05		IGFBP5	-4.22687	3.18937e-05
	PELI1	3.04156	1.25732e-05		TBC1D2	-2.58719	3.19887e-05
	AKAP12	6.63195	1.2592e-05		MXD4	-2.42239	3.21362e-05
	GABRB3	4.70885	1.26115e-05		PLEKHM1P1	-2.89097	3.25109e-05
	HSD11B2	5.972	1.28499e-05		CLDN9	-3.29418	3.28998e-05
	CXCR4	8.10344	1.29708e-05		PSCA	-5.99023	3.38833e-05
	NPAS1	4.77324	1.30137e-05		RAB11FIP5	-2.47815	3.40425e-05
	EPHA8	8.11884	1.31574e-05		PRR15	-3.92432	3.40549e-05
	GPC2	3.53659	1.32652e-05		SECTM1	-4.16532	3.42973e-05
	ETV4	4.59381	1.3399e-05		PTGFRN	-2.71613	3.43309e-05
	TPTEP1	4.35227	1.34013e-05		SH2D4A	-2.70563	3.4343e-05
	LDHD	6.55961	1.34165e-05		UPK2	-4.63625	3.44064e-05
	ZC4H2	2.9217	1.34778e-05		KLF4	-2.82331	3.47479e-05
	ME2	2.82099	1.35068e-05		TMEM117	-3.88758	3.51229e-05
	GNG4	3.78199	1.35702e-05		IRF9	-2.87037	3.56241e-05
	NPTX2	5.21734	1.36263e-05		GPR39	-3.90372	3.60005e-05
	UBE2S	3.9415	1.36801e-05		KANK2	-2.02522	3.62886e-05
	APOE	4.17869	1.39574e-05		NAGK	-2.33685	3.63399e-05
	NES	3.79645	1.4027e-05		IL17RE	-2.96316	3.65962e-05
	HIF3A	4.55265	1.41503e-05		LY6G6C	-6.08926	3.73324e-05
	RALGPS1	3.17771	1.42834e-05		BAMBI	-3.15755	3.74507e-05
	TOX3	7.48102	1.44104e-05		SOWAHA	-5.62857	3.74531e-05
	LRRTM1	7.96997	1.44911e-05		IL11RA	-2.93039	3.75349e-05
	PODXL2	3.20459	1.46691e-05		AMOT	-2.42968	3.76499e-05
	TAF4B	3.64055	1.47023e-05		BEAN1	-3.88986	3.792e-05
	AC007325.2	4.93198	1.47141e-05		RGCC	-4.43115	3.83067e-05
	ACBD7	4.41732	1.47677e-05		ECE1	-2.45933	3.84512e-05
	CUX2	6.58111	1.4938e-05		TMEM45A	-2.75478	3.86393e-05
	PDK3	3.21608	1.50968e-05		ERCC6	-2.65809	3.87684e-05
	RTKN2	3.88314	1.51275e-05		VAV2	-2.25508	3.88689e-05
	NPR1	6.24829	1.51382e-05		TRIM38	-2.72801	3.91127e-05
	MAD2L2	3.3081	1.52076e-05		ARHGDIB	-4.98658	3.9438e-05
	FGF19	8.7168	1.53041e-05		XAGE2	-5.37284	3.96392e-05
	KLHDC7A	6.26647	1.57538e-05		UBE2J1	-2.71869	3.98698e-05
	ADCK3	2.41245	1.58165e-05		MAML2	-3.175	3.99965e-05
	GDF3	8.23954	1.58352e-05		OAF	-3.10765	4.02444e-05
	TET1	4.33953	1.59639e-05		KCNIP3	-3.40811	4.05016e-05
	SEZ6	7.19674	1.5997e-05		TGFBR2	-3.74891	4.0728e-05
	TMPO	2.70214	1.61364e-05		ARAP2	-3.58169	4.08293e-05
	DZIP1	4.65111	1.61617e-05		IL13RA1	-2.30227	4.11848e-05
	HS3ST5	8.3941	1.64571e-05		OS9	-2.41061	4.13551e-05
	CHGA	4.31133	1.65883e-05		COL5A1	-4.60525	4.14862e-05
	LIX1	6.51978	1.67019e-05		ZNF229	-3.30711	4.1814e-05
	FHOD3	9.15944	1.67343e-05		IL6ST	-2.38421	4.19564e-05
	CNTN2	4.92361	1.69614e-05		RETSAT	-2.49197	4.21478e-05
	HAS2	6.77935	1.6971e-05		ABCA5	-3.0825	4.24155e-05
	ZIC1	7.3424	1.71283e-05		LRP11	-2.43276	4.33765e-05
	SLC7A11	3.9076	1.71891e-05		FUT8	-2.47169	4.40821e-05
	SEPHS1	3.14858	1.72691e-05		CARD14	-3.15526	4.48042e-05
	PAK1	2.44249	1.74053e-05		SMIM5	-5.33824	4.48521e-05
	GATM	7.02623	1.74457e-05		ACAP3	-2.40427	4.48604e-05
	BASP1	5.0522	1.75178e-05		HSBP1L1	-3.68841	4.51503e-05
	PPM1H	6.90733	1.75427e-05		PRR16	-4.81282	4.52386e-05
	TMEM178B	6.71395	1.75811e-05		NAGLU	-2.33546	4.5268e-05
	PITPNC1	2.74631	1.76211e-05		ENG	-3.07293	4.55536e-05
	GNG7	4.10449	1.76621e-05		GBP2	-3.67257	4.55729e-05
	MMD	2.80902	1.79349e-05		S100A4	-4.42908	4.58184e-05
	VSNL1	7.33147	1.79565e-05		LY6D	-4.44479	4.59183e-05
	OLFM1	3.99884	1.79791e-05		RPL29P19	-5.38946	4.61515e-05
	SARDH	4.01253	1.79801e-05		MBP	-2.91846	4.6153e-05
	PLPPR3	9.5435	1.79841e-05		UAP1L1	-2.66089	4.63212e-05
	YBX2	5.81731	1.79906e-05		NR3C1	-2.86097	4.64215e-05
	UNC5D	8.137	1.80484e-05		OPTN	-2.79706	4.66954e-05
	LYAR	3.38804	1.82371e-05		COMT	-2.55568	4.67723e-05
	SEMA3A	6.80439	1.84205e-05		ATP6AP1	-2.26322	4.67737e-05
	CYYR1	9.13204	1.84835e-05		CYP7B1	-3.86569	4.67827e-05
	LEFTY2	10.8423	1.88134e-05		SLC10A3	-2.42747	4.70686e-05
	RAB3C	7.83824	1.88886e-05		JUN	-2.72377	4.70714e-05
	IPO5	2.69565	1.89476e-05		TLN2	-2.37358	4.71674e-05
	SAMHD1	3.23242	1.89554e-05		S100A2	-4.35748	4.74022e-05
	PDE3B	5.5418	1.91452e-05		IGSF3	-2.78144	4.74683e-05
	NUDCD1	2.49558	1.97198e-05		ARSJ	-3.52659	4.75763e-05
	CALN1	7.00121	1.9881e-05		HIST1H2AC	-2.75437	4.76577e-05
	PKN1	4.98993	1.99946e-05		KREMEN1	-2.59892	4.81588e-05
	FAM20A	5.22439	2.01126e-05		S100A3	-4.53476	4.82205e-05
	SEPP1	4.07866	2.05344e-05		SYNE1	-3.33339	4.83026e-05
	HCK	6.86725	2.05777e-05		LAMA3	-4.64478	4.83234e-05
	LRFN1	5.08729	2.05875e-05		INS-IGF2	-6.95558	4.86799e-05
	RADIL	4.97622	2.05986e-05		VGLL3	-3.28974	4.91088e-05
	BTBD11	5.27015	2.07816e-05		PRICKLE2	-2.61254	4.9156e-05
	ARHGAP45	3.37938	2.08197e-05		CYP4F23P	-7.03492	4.97775e-05
	CHST7	4.29175	2.08416e-05		KIAA1462	-2.46364	4.98733e-05
	ST6GALNAC5	7.96761	2.10434e-05		PRSS30P	-6.39636	4.99587e-05
	CST1	8.21701	2.12835e-05		QSOX1	-2.55386	5.0069e-05
	ZFHX2	5.73933	2.12854e-05		ABCC2	-4.37222	5.02684e-05
	BRSK1	4.24778	2.14365e-05		MYO5B	-2.13144	5.07921e-05
	ERVMER34-1	3.54907	2.1447e-05		NNT	-2.11757	5.08452e-05
	IRS4	6.94026	2.15005e-05		AMFR	-2.00197	5.12078e-05
	PCDHB2	3.79851	2.19925e-05		COL7A1	-4.01509	5.18669e-05
	HAPLN1	7.11038	2.23592e-05		PPARA	-3.14476	5.20175e-05
	HLA-DPB2	8.7879	2.24574e-05		ZMAT3	-2.31919	5.24958e-05
	PPP1R16B	5.52905	2.25531e-05		SLC22A4	-3.88285	5.25132e-05
	FLT4	4.24061	2.26266e-05		KDELC2	-2.85101	5.25233e-05
	FKBP4	2.32041	2.27565e-05		MICALL2	-2.51168	5.33634e-05
	CILP2	3.51955	2.29188e-05		B3GNT9	-2.43304	5.36562e-05
	ADCY8	7.76015	2.32825e-05		AF011889.5	-3.01485	5.36674e-05
	VENTX	5.30238	2.35314e-05		CAMK2N1	-2.54705	5.38005e-05
	SH3GL2	7.76344	2.35747e-05		CDKN2A	-2.96876	5.38008e-05
	TRIM54	6.38319	2.36001e-05		ARHGAP30	-3.45941	5.38062e-05
	SIRT1	2.84425	2.36213e-05		GRN	-2.56994	5.40362e-05
	HTR1D	6.99213	2.3673e-05		ATP8B1	-2.98728	5.45161e-05
	GRAMD1B	4.20557	2.37912e-05		DEPDC7	-3.63396	5.48006e-05
	CDO1	7.31337	2.38653e-05		TRIM29	-3.21447	5.48131e-05
	PCBP3	4.153	2.40686e-05		SLC38A10	-2.21936	5.5095e-05
	PTP4A3	3.46503	2.40795e-05		COMMD3	-3.07336	5.54431e-05
	PHLPP1	2.92123	2.42535e-05		P3H4	-2.51008	5.55193e-05
	CTNND2	4.32997	2.43204e-05		CARD9	-3.00813	5.55492e-05
	FOXJ1	5.24572	2.44427e-05		FSTL1	-2.81832	5.63555e-05
	SORCS1	6.66996	2.44449e-05		IGF2	-4.27582	5.67281e-05
	CPLX2	7.98719	2.45399e-05		LGALS3BP	-2.51834	5.70691e-05
	SNCA	6.15454	2.45966e-05		TRPV3	-3.05857	5.86946e-05
	LAPTM4B	2.85727	2.46797e-05		SLC39A2	-5.00603	5.8708e-05
	HIP1	4.73852	2.47064e-05		ATP1A4	-3.64378	5.90673e-05
	FOXB1	5.73097	2.47141e-05		TLR6	-4.63792	6.04028e-05
	ELFN1	6.04946	2.48333e-05		TRIM55	-3.87242	6.10246e-05
	EPB41L5	2.59265	2.50907e-05		ATAD3C	-3.33339	6.14262e-05
	LEFTY1	8.27736	2.54862e-05		ARHGAP29	-3.26452	6.1476e-05
	RAX	7.92879	2.55066e-05		ENPP1	-2.71289	6.20618e-05
	RIMS3	4.15132	2.56161e-05		HPSE	-3.53796	6.22124e-05
	ARRB2	3.11799	2.57443e-05		ELF4	-2.74776	6.22511e-05
	ADA	3.38561	2.60494e-05		PHKA1	-2.1769	6.33623e-05
	MEIOB	8.02172	2.6198e-05		TRAK2	-2.83415	6.38077e-05
	CNTN1	5.52063	2.63457e-05		DFNA5	-2.3765	6.38409e-05
	WDR12	2.21804	2.65004e-05		AP000769.1	-3.26938	6.404e-05
	PODXL	4.58892	2.68875e-05		PIEZO1	-3.20383	6.43364e-05
	PRRX2	4.71489	2.69064e-05		KCNJ15	-3.86294	6.43548e-05
	ULK3	2.51194	2.69343e-05		FAM214B	-2.1444	6.47722e-05
	EXOC6	4.50922	2.69809e-05		REEP5	-2.01722	6.51171e-05
	SLC35F1	7.02366	2.72817e-05		PIK3R1	-3.36376	6.52029e-05
	SLITRK3	6.80146	2.78878e-05		DNASE2	-2.32464	6.54512e-05
	DNA2	2.89454	2.78938e-05		C19orf33	-4.16288	6.56471e-05
	FA2H	6.07716	2.82351e-05		KIAA1683	-3.875	6.63055e-05
	DPPA2	7.82691	2.82641e-05		S100A6	-4.0333	6.63662e-05
	KIF19	6.28022	2.84914e-05		EVA1B	-2.95524	6.63773e-05
	NANOGP8	8.72231	2.85954e-05		PWWP2B	-3.04492	6.66259e-05
	LIN9	2.81629	2.87162e-05		TCIRG1	-2.49855	6.69458e-05
	PTPRN	5.65587	2.91017e-05		CYB561D1	-2.34005	6.71708e-05
	HOMER1	2.97883	2.91375e-05		B3GALT4	-2.85826	6.7586e-05
	SFRP5	6.5415	2.94234e-05		SPATA18	-2.92064	6.84886e-05
	KLRG2	5.15252	2.94846e-05		WIPI1	-2.02183	6.85707e-05
	STMN3	2.66879	2.97103e-05		PPARG	-4.64522	6.87742e-05
	CCNJL	4.6126	2.9732e-05		SGSH	-2.17451	6.88181e-05
	NDC1	2.31916	2.99242e-05		RP13-104F24.3	-4.98695	6.90073e-05
	LAMA1	3.78606	2.99389e-05		H2BFS	-3.57228	6.98414e-05
	ADGRL1	2.18848	3.02343e-05		JAK1	-2.62755	6.98522e-05
	ASRGL1	3.04543	3.04911e-05		POLR2J3	-2.24941	7.01722e-05
	KLF15	5.56874	3.05791e-05		BST1	-3.22083	7.02695e-05
	SELV	6.68078	3.08019e-05		SLC9A3	-2.87077	7.05571e-05
	SBK2	7.53625	3.09541e-05		TMBIM1	-2.37875	7.06373e-05
	FAM213A	2.6514	3.10048e-05		MUC4	-3.96611	7.12435e-05
	GNG11	5.75394	3.11166e-05		VSIG8	-5.5891	7.1379e-05
	LRP8	3.39444	3.11318e-05		ELOVL1	-1.96369	7.15276e-05
	SPRED1	2.83705	3.12985e-05		CAST	-2.69464	7.17426e-05
	SCD	2.62724	3.13053e-05		LRRC37A16P	-2.57371	7.17816e-05
	UGP2	2.57769	3.13234e-05		ABTB1	-2.43751	7.2585e-05
	SRCIN1	5.48716	3.13585e-05		KLC3	-3.0152	7.35326e-05
	ZNF280B	7.66889	3.13631e-05		EPS8L2	-2.55065	7.37408e-05
	UNC5B	7.26365	3.15325e-05		PEG3	-4.28945	7.39112e-05
	MYCL	4.37964	3.17002e-05		ZHX3	-2.49749	7.42768e-05
	P2RY1	8.29359	3.18101e-05		PLEKHA6	-2.32773	7.57113e-05
	DUSP5	5.02589	3.18178e-05		AC240274.1	-2.54996	7.58765e-05
	NUP88	2.02923	3.19547e-05		BBOF1	-3.84808	7.62829e-05
	RNF2	2.13869	3.19888e-05		TRPM4	-2.53571	7.73852e-05
	SCML2	3.25456	3.22075e-05		MAST4	-2.73537	7.77031e-05
	PIK3R5	7.50735	3.22876e-05		FANK1	-3.48208	7.77151e-05
	CCDC177	7.59761	3.23326e-05		NDRG1	-3.50822	7.87378e-05
	PLA2G3	7.80407	3.25607e-05		BMPR2	-2.79694	7.88509e-05
	NASP	2.89206	3.25663e-05		LRRC32	-3.5252	7.93762e-05
	SALL3	6.9988	3.30056e-05		HIST2H2AA4	-3.04181	8.00637e-05
	BTBD17	7.80252	3.30431e-05		SLC39A4	-2.17768	8.03947e-05
	SYT11	5.38948	3.33017e-05		KRBOX1	-7.12482	8.11431e-05
	ARHGAP19	3.15764	3.34449e-05		SYTL3	-4.20492	8.12378e-05
	ANK2	2.79689	3.37921e-05		SLC9A1	-2.24857	8.18055e-05
	FGF12	5.55716	3.3848e-05		COLGALT1	-2.09733	8.19466e-05
	SCN8A	4.96376	3.40523e-05		PTPRM	-3.07041	8.25284e-05
	USHBP1	4.50227	3.4118e-05		SPRYD3	-2.22255	8.25356e-05
	SYN2	5.18369	3.4314e-05		TMEM175	-2.48101	8.26223e-05
	CRYBB1	7.47696	3.44362e-05		PARP9	-2.74927	8.27162e-05
	PNPLA5	6.69511	3.45231e-05		DSC2	-2.42648	8.41127e-05
	UNG	2.1562	3.47006e-05		RAB32	-2.47372	8.52381e-05
	JAG1	4.22571	3.48242e-05		PPP1R9B	-2.10735	8.56293e-05
	UTP18	2.07325	3.48781e-05		CDON	-3.46009	8.58424e-05
	NAP1L6	6.35167	3.50065e-05		PCDHGA12	-3.81996	8.61449e-05
	COL14A1	7.10987	3.51468e-05		IL1RN	-6.42323	8.61668e-05
	CBLN1	6.69364	3.60706e-05		PIK3C2G	-4.80942	8.66906e-05
	TRIM36	4.91864	3.60982e-05		FAM160B2	-2.06448	8.73443e-05
	COL2A1	8.10673	3.62561e-05		TCEA3	-3.86789	8.77682e-05
	TCOF1	2.29273	3.64166e-05		PGBD3	-6.84442	8.77688e-05
	SRSF7	2.12039	3.69903e-05		TREX1	-3.74773	8.78837e-05
	DLGAP3	4.46639	3.70796e-05		SCD5	-3.42953	8.91551e-05
	PRIMA1	5.89217	3.72209e-05		ARID5B	-2.81592	8.93578e-05
	SLITRK5	5.82919	3.74012e-05		MAPK11	-2.8752	9.01194e-05
	SLC30A3	6.31071	3.74304e-05		MAP3K1	-2.19966	9.05591e-05
	LRRC3B	7.49615	3.74754e-05		LRRFIP1	-2.63926	9.0595e-05
	CGNL1	5.44544	3.77733e-05		SUN2	-2.42414	9.0992e-05
	DPF1	4.61962	3.79256e-05		ADIRF	-6.18836	9.11364e-05
	GLI3	2.35358	3.80271e-05		SLC2A10	-2.44508	9.12058e-05
	MCM7	2.86929	3.83332e-05		TMEM19	-2.08698	9.18093e-05
	PAICS	2.53587	3.85089e-05		EPB41L4A	-2.45936	9.33606e-05
	RCAN2	6.36041	3.86144e-05		CYTH1	-3.15268	9.33761e-05
	PRMT1	2.3891	3.86716e-05		BACE1	-2.15447	9.35325e-05
	RP11-640N20.6	7.43554	3.91592e-05		ZNF300P1	-6.48615	9.36841e-05
	TDRP	2.74373	3.92499e-05		TMED3	-2.55485	9.37535e-05
	COL9A3	4.10799	3.94073e-05		TRIM16L	-2.51862	9.37978e-05
	KDR	9.31888	3.94981e-05		GM2A	-1.90749	9.42919e-05
	CNTFR	8.62485	3.96748e-05		PNPLA7	-3.61809	9.4328e-05
	FBXL16	5.24813	4.00821e-05		GYPC	-2.71386	9.43796e-05
	RP11-598P20.5	7.45759	4.01507e-05		NBPF9	-2.18878	9.45301e-05
	VAT1L	7.56057	4.03453e-05		SRPX2	-3.75138	9.46561e-05
	BAIAP3	4.43942	4.03507e-05		ACCS	-2.76138	9.47227e-05
	PASK	2.3383	4.04129e-05		DPP4	-3.60391	9.47511e-05
	SH3GL3	6.47931	4.04718e-05		ZFP3	-3.88231	9.57042e-05
	C16orf59	2.31205	4.05926e-05		CST3	-2.40041	9.57423e-05
	ADGRG5	5.8466	4.08352e-05		HSF4	-4.9227	9.57923e-05
	SLC25A23	2.29127	4.09363e-05		CD99	-2.5603	9.60154e-05
	CCDC112	4.32031	4.12701e-05		PSTPIP2	-2.57582	9.64482e-05
	RNF182	6.71972	4.14542e-05		FAM127C	-2.31086	9.72046e-05
	BORCS7-ASMT	7.41969	4.15163e-05		APBB3	-2.44681	9.76928e-05
	UCHL1	3.4685	4.16937e-05		PBXIP1	-2.44228	9.79312e-05
	NFYB	2.35528	4.18334e-05		CISH	-2.94818	9.82162e-05
	ATP2A3	4.83137	4.20837e-05		STARD10	-2.52964	9.84297e-05
	CTSC	3.10296	4.21662e-05		PON2	-2.08938	9.93054e-05
	EGR1	4.64389	4.25475e-05		KIFAP3	-2.76006	0.000100314
	TCL1B	7.36202	4.27352e-05		ZNF702P	-2.37325	0.000100553
	C6orf141	6.06773	4.36821e-05		DST	-3.18888	0.000102171
	DLL3	4.78565	4.37367e-05		PDE8A	-2.98193	0.000102288
	TENM4	4.2325	4.37975e-05		SAMD9	-5.14625	0.00010294
	NMU	5.71251	4.394e-05		PLSCR4	-3.58081	0.000103117
	HSPE1	2.68646	4.40083e-05		IFI6	-3.96162	0.000103144
	ST8SIA3	7.65641	4.40763e-05		H6PD	-2.0549	0.000103281
	NRROS	5.43478	4.4682e-05		AP5S1	-2.42412	0.000103346
	IGDCC3	2.46906	4.46937e-05		MEGF9	-3.51325	0.000103543
	SSBP3	2.00115	4.53479e-05		PRRG2	-2.69238	0.00010369
	PRKCQ	3.72642	4.55406e-05		OSBPL7	-2.14647	0.000103896
	RAB39B	7.89098	4.56089e-05		AKTIP	-2.03349	0.000104016
	RANBP1	2.33848	4.57865e-05		MROH6	-2.98759	0.000104076
	CHST6	4.35522	4.59014e-05		CLCF1	-3.06371	0.000104929
	KYAT1	2.43559	4.60892e-05		CYB5R1	-3.03179	0.000104958
	KIF26A	4.74868	4.6274e-05		SRSF8	-1.96669	0.000105387
	LDB2	3.73405	4.64455e-05		MLPH	-2.70581	0.000105464
	OCLN	3.20982	4.66609e-05		DAZAP2	-2.19227	0.000105722
	SHD	7.32228	4.68912e-05		UGT1A6	-3.41775	0.000106395
	CERS4	2.40334	4.72276e-05		ZNF704	-2.34734	0.000106709
	ABLIM1	4.2763	4.7338e-05		LAMC1	-2.30376	0.000107031
	HELLS	3.33125	4.7597e-05		CTSL	-2.6899	0.000107586
	FGFR2	2.96365	4.77289e-05		SHROOM1	-2.28127	0.000107865
	ADGRL3	5.1677	4.78636e-05		LUM	-4.60927	0.000108361
	KLKB1	6.4089	4.83628e-05		SDF4	-2.01316	0.000109995
	NODAL	6.17498	4.84496e-05		CYLD	-2.13314	0.000111633
	RP11-651P23.4	4.09099	4.86881e-05		EMILIN2	-3.27632	0.000111681
	LIG3	1.9746	4.88636e-05		AHDC1	-1.91086	0.000111852
	ACVR2B	2.57335	4.94552e-05		MVP	-2.85944	0.000112962
	CDC25A	3.61718	4.97614e-05		FBXO6	-3.05715	0.000114386
	KHK	3.82511	5.01519e-05		ZNF596	-3.38789	0.000114468
	TTLL6	6.30278	5.03904e-05		LPGAT1	-2.32109	0.000115359
	MUC3A	3.43014	5.04481e-05		IGFBP6	-2.73799	0.000116843
	DOCK2	6.5093	5.05572e-05		ANXA2	-2.9873	0.00011825
	NRXN1	7.72483	5.0778e-05		CCND3	-2.11092	0.000118403
	TEAD4	3.61803	5.09258e-05		LTBP1	-2.41381	0.000118443
	MAT1A	7.73047	5.10414e-05		CYB5D2	-2.41337	0.000118464
	ZNF649	2.46157	5.13045e-05		ZC3H12C	-2.55569	0.000118572
	CHRM3	6.11649	5.15156e-05		SLC25A20	-1.98441	0.000118619
	SEMA6A	7.52157	5.21616e-05		TMEM79	-3.0902	0.000118933
	AEBP1	2.60702	5.24312e-05		MAP1LC3A	-2.53932	0.00011963
	DISP3	4.08862	5.25172e-05		ZADH2	-2.89961	0.000119723
	ETV1	4.00983	5.26929e-05		CLK1	-1.98304	0.00012023
	SLC29A2	2.23283	5.32375e-05		SH3D21	-2.23344	0.000121056
	FADS3	3.16885	5.35359e-05		RP13-104F24.1	-3.55752	0.000121058
	CELF2	2.81533	5.35575e-05		TPM1	-2.5608	0.000121283
	CRIP3	4.67265	5.3597e-05		HIST1H4I	-2.77951	0.000121455
	SP5	8.39247	5.37784e-05		KAZALD1	-3.21142	0.000121797
	ALDOC	2.49694	5.38247e-05		TNFSF15	-3.71261	0.00012203
	NKD2	7.53969	5.39117e-05		ETHE1	-3.02853	0.000122138
	PPP1R14A	3.98574	5.42676e-05		ERCC5	-2.28537	0.000123088
	CABLES1	4.94143	5.51252e-05		DPP7	-2.67532	0.000123256
	TRABD2B	7.59674	5.51473e-05		MAGIX	-3.34368	0.000123712
	CHST9	7.56916	5.53014e-05		CCDC96	-3.8955	0.000123988
	SNN	2.60143	5.58775e-05		MBOAT2	-2.54127	0.00012446
	BRSK2	5.78109	5.62161e-05		HSPG2	-3.1175	0.000124585
	ST6GAL2	5.84914	5.67945e-05		KRT17	-3.68484	0.000125322
	PPM1J	2.39001	5.68937e-05		PLOD1	-2.51444	0.00012567
	TSPAN7	5.59201	5.72562e-05		SPARC	-3.75848	0.00012657
	CRYGEP	7.21487	5.72977e-05		EPSTI1	-4.2272	0.000126968
	SOBP	7.40717	5.73529e-05		DRAM1	-2.27069	0.000127164
	VIPR2	6.05225	5.76347e-05		CES2	-2.24061	0.000128249
	SLC45A3	5.14142	5.77204e-05		FAM109B	-2.13867	0.000128271
	PNMAL1	4.11596	5.77753e-05		FAM156B	-2.39215	0.000128772
	FABP7	5.91592	5.79732e-05		RAMP1	-4.74776	0.000128885
	NAT10	2.33292	5.82116e-05		SH3RF1	-1.90443	0.000129688
	C1orf106	2.8504	5.83775e-05		SHROOM4	-2.94536	0.000129899
	CR2	4.98909	5.83997e-05		BTBD19	-3.81327	0.000129995
	ACTA1	8.18237	5.88569e-05		SLC35F5	-1.89577	0.000130967
	ATXN3	3.62358	5.99193e-05		SPATA20	-2.3279	0.00013099
	PKIA	8.11827	6.00159e-05		PINK1	-2.2021	0.000132231
	ACOXL	4.66858	6.01272e-05		DHRS1	-2.23123	0.000133112
	WDR43	2.44791	6.08186e-05		EHD2	-2.53446	0.000133213
	SLC7A2	4.9516	6.10219e-05		RHOD	-2.97197	0.000133355
	SLC9A7	3.41905	6.22988e-05		SMYD2	-2.08998	0.00013392
	CACNG8	4.95389	6.25827e-05		ODF3B	-3.87853	0.000135288
	TRIB1	2.61673	6.30315e-05		CTBS	-2.96146	0.000137412
	SPATA13	3.8681	6.33503e-05		HOXC4	-4.90905	0.000137575
	RAB37	3.71372	6.34046e-05		KLK6	-3.23128	0.000138926
	CA4	7.22231	6.43886e-05		GLT8D1	-2.18009	0.000139075
	NFASC	5.88375	6.48753e-05		FYTTD1	-1.84838	0.000139276
	CCL2	6.52488	6.49286e-05		HCLS1	-3.91617	0.000139645
	NLN	2.90358	6.49493e-05		SEL1L	-2.37895	0.000140938
	CHDH	4.51306	6.52767e-05		ENDOU	-6.41818	0.000141491
	WSCD2	7.11972	6.53897e-05		PYGL	-1.92368	0.000142392
	FAM216A	2.9394	6.5782e-05		TYK2	-1.82037	0.000143314
	ELMO1	4.66817	6.62178e-05		VMAC	-2.71377	0.000144291
	PPP4R4	5.87796	6.65456e-05		PPM1M	-2.29276	0.000144409
	CEND1	4.58462	6.70689e-05		SLC16A13	-2.58969	0.000144686
	GPI	2.88931	6.71818e-05		F3	-3.73513	0.000145204
	CACNA1G	4.31297	6.733e-05		TNC	-3.60105	0.000145743
	ATRNL1	5.07668	6.74393e-05		CLIC2	-3.6963	0.00014621
	SRRM3	3.13657	6.75267e-05		SYTL4	-3.32157	0.000146307
	SNCB	7.5538	6.75453e-05		MC1R	-2.10682	0.000146621
	PCCB	2.0467	6.7606e-05		THBS1	-4.36996	0.00014829
	TPH2	3.51128	6.76387e-05		VDR	-4.53732	0.000148785
	NMNAT2	4.57885	6.81141e-05		TBC1D3K	-6.446	0.000148947
	GAL3ST1	4.50103	6.83752e-05		CYB561	-1.7804	0.000150799
	GALNT14	5.60209	6.852e-05		NBPF20	-3.51645	0.000151065
	ABHD17B	2.35876	6.85415e-05		ITGAV	-3.3342	0.000151537
	GRIK4	5.85362	6.85452e-05		SLC35F6	-2.29419	0.000152362
	KLHL14	7.14336	6.86709e-05		VILL	-2.29617	0.000152481
	C11orf84	2.13854	6.86832e-05		LTBP2	-3.94065	0.000152563
	STIP1	2.00784	6.89223e-05		SSPN	-2.91039	0.000152578
	SPRY4	5.55838	6.90707e-05		NTM	-2.90943	0.000153185
	SYT3	7.95502	6.90711e-05		ME1	-2.03614	0.000153424
	CCNG1	2.42943	6.97937e-05		POLD4	-2.55045	0.000153705
	C3	4.05343	6.98406e-05		RGAG4	-2.58639	0.000154466
	SLC27A2	7.24951	6.98818e-05		TAOK3	-2.5178	0.000154523
	COL22A1	8.2283	7.02429e-05		CHI3L2	-3.81316	0.00015501
	HK2	2.75535	7.0254e-05		UPK1B	-5.42252	0.000155053
	DTNA	4.07819	7.0336e-05		MBNL1	-2.1784	0.000155413
	TIMELESS	2.27809	7.04883e-05		DDX60L	-3.08896	0.000155872
	SCNN1G	5.57929	7.06511e-05		FBXL17	-2.34258	0.000155932
	ARC	6.55083	7.0704e-05		HACD2	-1.84837	0.000156662
	ARHGEF6	4.28668	7.1086e-05		ITFG1	-2.17251	0.000156826
	CCL26	7.22805	7.17493e-05		FAS	-2.44727	0.00015811
	TEX15	7.44061	7.22166e-05		NTF4	-3.12194	0.000158361
	TMEM158	3.90059	7.22266e-05		CBLN3	-3.41141	0.000158414
	CHKA	2.53681	7.2536e-05		PRKCH	-2.30252	0.000158763
	AGMAT	4.69288	7.28823e-05		SLC39A13	-2.34786	0.000159197
	RNF125	3.41811	7.32071e-05		S1PR3	-2.77289	0.000159909
	FJX1	4.58946	7.34255e-05		NUTM2D	-3.08603	0.000160463
	MFNG	7.40445	7.37475e-05		CPNE1	-2.14773	0.000160519
	CPNE7	4.41966	7.38734e-05		FAM210B	-1.93298	0.000160696
	PTGIS	2.82407	7.39201e-05		CH507-42P11.8	-1.91587	0.000160761
	MARK1	5.28446	7.3969e-05		H2AFY	-1.9672	0.000161012
	IMPA2	2.81213	7.40134e-05		MMRN2	-2.64079	0.000161169
	CACNG6	7.09616	7.436e-05		TUFT1	-2.47893	0.000162699
	CECR6	5.72053	7.44843e-05		TIFA	-2.97142	0.000162763
	RPP25	3.46654	7.46508e-05		PTK7	-2.91321	0.000162965
	NUP35	2.65394	7.51294e-05		AP1G2	-1.71904	0.000163081
	GALNT9	6.8274	7.5467e-05		RIN3	-2.83457	0.000163677
	FN3K	2.96536	7.5529e-05		TMEM9B	-2.10713	0.00016532
	STMN2	6.22717	7.55487e-05		BLCAP	-1.7493	0.000166593
	RTBDN	6.13002	7.60611e-05		STAT4	-3.7788	0.000166726
	CAPN13	6.42838	7.61838e-05		NUCB2	-2.47982	0.000168494
	ENOPH1	2.04958	7.69865e-05		OSBPL5	-2.30106	0.000168579
	USP13	2.2334	7.70444e-05		HIST2H2BE	-2.82537	0.000170068
	WDFY2	2.29401	7.76913e-05		ARHGEF37	-3.28352	0.000173043
	ANKRD33B	3.24953	7.78539e-05		LIN37	-2.26163	0.000174208
	TRAP1	2.50405	7.78936e-05		TDRD9	-4.48338	0.000174999
	EEF1E1	2.93503	7.7916e-05		TCEAL1	-2.65161	0.000175563
	LMO1	6.8093	7.81827e-05		AC110615.1	-6.53755	0.000176072
	EPHB1	5.06288	7.86262e-05		SPRR3	-4.71076	0.000177707
	DNAJB5	2.57501	7.88528e-05		PLEKHN1	-3.38982	0.000177824
	BOD1	1.9755	7.9016e-05		CLIP1	-2.13172	0.000178009
	LDHB	3.28799	8.04599e-05		IL10RB	-2.80044	0.000178236
	TRIM46	3.50838	8.11858e-05		C11orf63	-3.60923	0.000178395
	CECR5	2.11482	8.14208e-05		PPP3CC	-2.27021	0.000179899
	ZNF114	4.09322	8.17173e-05		KRT16P6	-6.71131	0.000180026
	HNRNPAB	2.19511	8.17556e-05		ARHGAP31	-3.29877	0.000180568
	TBL1Y	6.99217	8.22478e-05		RAB22A	-1.79983	0.000181343
	MYB	5.3667	8.2682e-05		CADM1	-2.84064	0.000182089
	JARID2	2.77646	8.28701e-05		FCGRT	-2.04166	0.000182962
	AGPAT5	2.8144	8.30667e-05		OSTF1	-2.46279	0.000184032
	APLN	4.80868	8.34378e-05		NPY4R	-6.7338	0.000184115
	HUNK	3.13856	8.40232e-05		BMP2K	-1.85077	0.000185092
	KIAA1324L	3.06838	8.44395e-05		CLEC7A	-3.82739	0.00018614
	POLD1	2.34909	8.47376e-05		EXPH5	-3.42754	0.000186754
	MTFP1	3.12541	8.54122e-05		HLA-F	-3.44239	0.00018752
	TMEM108	4.34644	8.54498e-05		CDHR4	-5.45528	0.000188111
	INSM1	7.00294	8.6439e-05		NOL3	-2.95168	0.000189071
	ACAP1	2.45429	8.6746e-05		LPXN	-2.8285	0.000191367
	GPR50	7.18132	8.69883e-05		TRPV6	-3.33301	0.000191792
	ZNF93	2.75453	8.74323e-05		NSG1	-1.7841	0.000195363
	PARD6A	3.84461	8.74705e-05		NDST3	-3.673	0.000195463
	RAB17	4.55683	8.77898e-05		PLEKHG4	-1.83069	0.000196242
	FAM159B	6.94826	8.80965e-05		KLHL22	-2.33732	0.000196943
	A2M	6.44747	8.86133e-05		AP003419.11	-2.29081	0.00019698
	ECT2	2.61063	8.87675e-05		NMNAT1	-2.3715	0.000197457
	UNC13B	2.20041	8.9373e-05		ARMCX3	-1.89314	0.000198175
	GPT2	2.69543	8.99865e-05		STARD13	-2.25813	0.000199923
	DHRS13	2.56838	9.04744e-05		ANO6	-1.93731	0.000200126
	SH2D5	5.03109	9.05866e-05		MAN1B1	-2.00238	0.000201966
	RNF175	5.40319	9.06983e-05		NBL1	-2.40224	0.000205028
	DHTKD1	2.35697	9.07279e-05		FBXO4	-3.22065	0.000205503
	SNCAIP	7.3405	9.12665e-05		DNAJA4	-2.35428	0.000206447
	NOVA1	5.01937	9.17653e-05		DOCK9	-2.56526	0.000206636
	SCUBE1	4.02377	9.23844e-05		ERMAP	-1.86339	0.000206824
	EGR2	6.9548	9.2846e-05		FBRS	-1.87568	0.000207447
	MEST	4.61595	9.28568e-05		PIWIL4	-3.92962	0.000208275
	KDM2B	2.00289	9.32039e-05		DNASE1	-2.16917	0.000209172
	ALDH3A2	2.39617	9.34962e-05		NDFIP2	-1.78562	0.000210362
	SHISA9	3.07228	9.4012e-05		PCSK1N	-4.12553	0.00021038
	PGAM5	2.74827	9.40169e-05		FN1	-4.09406	0.000210386
	SLC2A4	4.18314	9.41369e-05		LMF2	-1.96473	0.000210693
	UBA2	1.97711	9.42377e-05		CD151	-2.40965	0.000212215
	CELF5	4.3529	9.4254e-05		SLC18A3	-6.6773	0.000212272
	TCF15	6.98592	9.43716e-05		TPD52L1	-2.64919	0.000214151
	PIF1	3.52397	9.4403e-05		ANKFN1	-5.08092	0.000214827
	LDLRAD3	2.88579	9.44604e-05		TMEM132A	-2.3792	0.000215132
	GTPBP1	2.02758	9.56787e-05		ATRN	-1.9	0.000215442
	MAPK8IP1	2.69377	9.67198e-05		SYT16	-3.44355	0.000215995
	CCT5	2.06101	9.77965e-05		SH3D19	-2.01384	0.000216424
	SLITRK4	5.5807	9.8189e-05		ACOX1	-1.78988	0.000217234
	GLUL	2.47624	9.87105e-05		MST1	-2.65732	0.000217832
	KCNJ11	5.97276	9.9139e-05		ACP2	-1.84861	0.000219191
	GTF2H2C	3.32892	9.924e-05		PRRG4	-2.68749	0.000219828
	TMEM37	3.19728	9.95948e-05		RBMS3	-2.61544	0.000219854
	DBF4	2.75535	9.9995e-05		NEK7	-1.77523	0.000219997
	ROR1	2.74346	0.000100415		GPC1	-2.25827	0.00022078
	NETO1	7.33116	0.000101344		KIFC2	-2.0359	0.000220958
	LPAR4	5.84256	0.000101396		TAPBPL	-3.51003	0.000221028
	THEMIS2	4.66804	0.000101545		LGALS9	-3.5554	0.000221276
	TLE6	5.62132	0.000101624		EFNA1	-2.46011	0.00022148
	METTL7B	6.95177	0.000102517		ATL3	-1.88245	0.000223396
	NOS1AP	3.62978	0.000102518		RHBDF1	-2.17681	0.000223477
	MRPL42	2.28208	0.000102539		LIMS4	-6.02357	0.000223623
	KIAA0922	3.42587	0.000102641		ZNF471	-2.9558	0.000224691
	PROKR1	6.89998	0.000102967		TTC12	-2.57709	0.000225347
	HTR7	6.45344	0.000103121		NKAPL	-5.34688	0.000225872
	TMEM132C	7.52185	0.000103292		CASQ1	-2.96786	0.000225915
	APOC1	3.75637	0.00010348		HSPB8	-2.92762	0.000227578
	HMGA2	2.58033	0.000103502		FAM180A	-4.7316	0.000228556
	BNIP3	2.51874	0.00010352		SH3PXD2A	-2.41479	0.000228629
	TMEM151B	6.47952	0.000103615		ZNF862	-2.8721	0.000228896
	RYR2	7.64707	0.000103726		SLC25A45	-2.938	0.000229219
	RHPN2	2.48719	0.000103963		HHAT	-2.83773	0.00022949
	ORC1	3.96326	0.000104756		LCAT	-2.74997	0.000229629
	NTHL1	2.3234	0.000105798		ELMO3	-2.24757	0.000229903
	KHDRBS2	6.90106	0.000105917		YPEL5	-1.75715	0.000230127
	TIMM50	1.94739	0.000105927		IFNAR1	-1.89958	0.000230996
	PLCB1	4.52521	0.00010622		AADAT	-2.20255	0.000231811
	TMEM74	6.83125	0.000106632		C9orf3	-2.43878	0.000232089
	CORO2B	7.1744	0.00010732		LAMP1	-1.96003	0.000233775
	EDA	2.92142	0.000108317		SCARB2	-2.25749	0.000238453
	BCL6B	4.96038	0.000109325		ZFHX3	-3.01486	0.000238723
	ACTC1	8.92034	0.000109448		C22orf23	-2.35287	0.000239311
	FAM169A	5.02187	0.000109602		SERINC1	-2.01589	0.000240481
	CCDC169	3.80194	0.000110004		HCFC2	-3.64035	0.000241664
	ELAVL2	3.51606	0.000110397		SERINC2	-1.8416	0.000241704
	MRPL3	1.80921	0.000110769		KIRREL3	-3.38877	0.000242121
	SLC2A14	5.42079	0.000111397		JAK2	-3.0304	0.000244662
	DDIAS	3.40858	0.000111602		HLA-E	-2.32595	0.000244685
	FABP3	4.81798	0.000111683		D2HGDH	-2.04265	0.000244934
	ANXA6	2.09449	0.000111993		TMEM200B	-1.98265	0.000245709
	IQSEC3	6.20605	0.000112101		COL3A1	-4.42522	0.000246551
	FRAT2	3.37471	0.000112675		SEC22B	-1.81718	0.00024751
	HECW1	5.79071	0.000113858		CDK20	-2.53467	0.000248999
	DKC1	1.90115	0.000113902		FBXO3	-1.93955	0.000249939
	STAC2	5.46897	0.000113954		NKPD1	-3.65844	0.000254772
	SEZ6L2	2.48227	0.000114513		EVC	-2.22274	0.000257657
	MCM3	2.75767	0.000115489		UCN2	-4.11888	0.000258556
	DLL1	4.83961	0.000115528		IQCE	-2.03665	0.000259385
	SPIB	4.83581	0.00011641		UBA7	-4.01369	0.00025994
	ASPHD2	3.33922	0.000116473		RAB27A	-2.27466	0.000260991
	RSPO4	4.31059	0.000117637		MT1F	-2.54542	0.000261254
	PDE7A	2.31854	0.000118284		CTF1	-3.022	0.000261967
	C1QL1	3.92408	0.000118789		CREB3L2	-1.76314	0.00026286
	PDE4B	4.0487	0.000119124		DNM1P47	-4.10062	0.000263649
	HRH2	7.28021	0.000119425		KCNJ13	-4.24786	0.000264092
	PAK1IP1	2.22975	0.000119652		ACSL3	-2.3171	0.000264654
	MFSD6L	5.92155	0.000120336		DOCK5	-3.41128	0.000265023
	PRKCB	7.71527	0.000120613		VGLL1	-5.50689	0.000265234
	TDP1	1.79511	0.000120618		STOML1	-2.22383	0.000265997
	LRRTM4	4.69876	0.000120684		TACSTD2	-3.79606	0.000266333
	MASP1	5.49073	0.000121435		SSH3	-2.03916	0.000267467
	DTX1	4.79127	0.00012157		MYL5	-2.46956	0.000270136
	SPTSSB	6.096	0.000121704		ULK1	-2.22414	0.000270515
	WIF1	6.83477	0.000121953		ELMSAN1	-1.95362	0.000270809
	FRY	4.68754	0.00012321		PAM	-2.15402	0.000271844
	FAR2P2	4.3959	0.000123684		ZDHHC24	-1.98089	0.000272112
	ADGRG2	3.19665	0.000124571		MERTK	-2.21218	0.000272412
	LUZP2	4.37571	0.000124672		KCNJ2	-3.50773	0.000272655
	ZNF738	2.35164	0.000124679		ANTXR2	-2.49561	0.000272935
	MAGI1	2.59902	0.000124855		RABEP2	-1.9494	0.000273981
	BOP1	2.25429	0.000125262		AC010970.2	-2.7385	0.000274594
	RP11-240B13.2	7.24583	0.000125649		RALB	-2.05839	0.000276553
	WDR74	2.07574	0.000125754		PLEKHM1	-1.95782	0.000277105
	TMPRSS2	6.433	0.000126465		C5orf24	-1.83009	0.000277813
	IRX3	5.63442	0.00012747		CAPN6	-1.94106	0.00028049
	SYP	3.44529	0.000128006		GPRC5A	-5.08676	0.000281271
	DDX21	2.50159	0.000128169		ALOXE3	-4.22696	0.000281477
	RPL39L	4.24596	0.000128705		MAN2A2	-2.13645	0.000282322
	DENND1C	3.48607	0.00012879		FPGT	-2.37767	0.000282914
	ZEB2	4.14831	0.000129016		RNFT1	-2.47936	0.000283473
	DCAF12L1	6.81455	0.000132113		FIBCD1	-2.89388	0.00028531
	MTHFD1	2.23735	0.000133776		HSF2BP	-3.09821	0.00028739
	MTA3	2.24923	0.000134144		SVIL	-2.16184	0.000290155
	ITLN2	6.01672	0.000134171		DEF6	-2.49048	0.00029111
	CTXN1	3.76263	0.000135047		ZNF354C	-3.561	0.000292275
	YPEL1	2.6791	0.000136948		EXT2	-1.64047	0.000294932
	C4orf46	1.99796	0.000138018		TRIM34	-2.93123	0.000295474
	C1QBP	2.64954	0.000138561		RNF14	-1.79006	0.00029605
	SMARCD1	1.93737	0.000139915		C1RL	-1.72004	0.000296176
	MICB	3.86812	0.000140058		PIGCP1	-2.6487	0.000296327
	TGIF1	1.82562	0.000140233		RALGDS	-1.61133	0.000297242
	LRRC61	2.05637	0.000141023		RBBP8NL	-3.48087	0.000298739
	ALPPL2	5.423	0.000141261		PMM1	-2.34854	0.000299531
	PARPBP	2.58576	0.000141406		ST5	-2.03043	0.000299922
	HES6	2.57125	0.000141559		TBC1D10A	-2.20157	0.000301579
	BAG2	2.21093	0.000141624		PIGS	-1.87643	0.000301603
	UGCG	2.08887	0.000141644		LMBRD1	-2.14549	0.000303351
	ZNF620	3.56742	0.000141849		GLT8D2	-2.69181	0.000303981
	PHACTR1	3.7598	0.000142189		CYP8B1	-3.80316	0.000306077
	JADE1	2.33427	0.000143694		CELSR1	-2.45607	0.000306708
	MIIP	1.91411	0.000143897		ZNF688	-2.40894	0.000309097
	WDR72	4.6079	0.000144993		DCHS2	-2.92543	0.000310311
	STRBP	2.51492	0.000145081		SOAT1	-1.99673	0.000312439
	TPST2	2.67936	0.000145381		HSPB1	-2.23928	0.000313753
	NKD1	3.18031	0.00014542		CSGALNACT1	-2.87872	0.000314627
	CACNA1F	5.57825	0.000146025		TRIM47	-2.34933	0.000316757
	PLEKHH1	3.24755	0.000146547		AC018755.18	-6.82336	0.000318556
	HHEX	5.65329	0.000146828		TMOD3	-2.2039	0.000318877
	SYN1	3.3894	0.000147099		KHNYN	-1.81571	0.000319225
	PHC1	3.21845	0.000148033		PCDHGA7	-4.31366	0.000320512
	STAU2	1.94191	0.000148592		TNFRSF14	-4.69581	0.000321366
	CYCS	2.05947	0.00014934		TXNDC11	-1.72536	0.000324975
	HSPA2	2.54811	0.000149418		ANKRD2	-4.32626	0.000327898
	TMEM132D	7.91891	0.000149423		HIPK3	-1.91241	0.000328264
	ACTR3B	2.48056	0.000149627		TMED9	-2.09602	0.000328644
	TGIF2	1.93248	0.00015076		NBPF14	-2.02198	0.000328709
	ASTN1	4.10073	0.000153144		HLA-DOB	-5.25297	0.000329741
	ADO	1.85951	0.000153627		GPC5	-5.00702	0.000331161
	ADAM22	5.76839	0.000153845		TMEM59	-2.12629	0.000332181
	HMGA1	4.91975	0.000155934		NFIX	-3.50773	0.000332224
	DAZAP1	1.91284	0.000156425		SKAP2	-2.56746	0.000333022
	C2CD4C	5.36935	0.000156753		NFIC	-2.42675	0.000336958
	MRAP2	4.90306	0.000158183		GMPPA	-1.66161	0.000340506
	NOLC1	2.05129	0.000158381		IL1R2	-5.2359	0.000342936
	ENHO	3.95645	0.000158425		PLXNB2	-1.94361	0.000345014
	MAD2L1	3.54709	0.000160865		CYBRD1	-2.39534	0.00034515
	RBFOX3	5.61966	0.000161146		GNPTG	-2.08346	0.000346255
	TSPAN11	4.52549	0.000161339		ABCB9	-2.00026	0.000351731
	SCARB1	2.04416	0.000161583		TOB1	-1.62362	0.000352084
	SCG3	3.54799	0.000162798		ABHD14B	-2.6401	0.00035267
	DACH1	7.07997	0.000163943		SPON2	-3.22341	0.000358551
	AKIRIN1	2.47232	0.000164042		FAM161B	-2.89242	0.00035987
	DYRK3	4.39985	0.000164114		ITGB1	-2.35125	0.000360159
	TTBK1	5.69638	0.000165269		LARP6	-1.91087	0.000361305
	GLB1L3	5.2601	0.000165513		RUNX1	-3.25222	0.00036363
	SERPINA5	6.09017	0.000166291		CD248	-2.93715	0.000364572
	RYR1	3.44983	0.000167482		ZDHHC14	-2.2563	0.000364713
	CCDC86	2.8997	0.000168111		ZNF585B	-2.39254	0.000366662
	CNN2	3.4334	0.000168452		RSPH3	-2.04288	0.00036683
	GIPC3	4.97512	0.000168475		MICA	-2.16605	0.000366995
	RBM38	2.7512	0.00016861		TSPAN13	-2.43939	0.000367141
	ATP1B3	1.79755	0.000170006		SPESP1	-5.29257	0.000368653
	KIAA1191	1.77518	0.000170278		LMNA	-2.71365	0.000369174
	CAMK2N2	3.09172	0.000171581		TEX261	-1.84413	0.000370011
	FUS	2.25127	0.000171594		SP140L	-2.92129	0.000370169
	SEMA3G	5.26377	0.000171682		SUCO	-2.63754	0.000372586
	TSPAN5	2.98058	0.000172337		ZNF664	-1.80671	0.000373596
	PRODH	2.43357	0.000173102		CNKSR1	-1.75221	0.000374885
	UBE2O	2.10481	0.000174587		LIMK2	-1.94745	0.000376511
	NSL1	1.79591	0.000174702		CUX1	-1.6787	0.000377105
	IGF2BP1	2.49151	0.000176123		WNT2	-6.34102	0.000378054
	ANKRD24	2.22565	0.000176515		DHRS2	-2.80879	0.000381102
	ARHGAP44	2.10166	0.00017686		OSBPL3	-1.92504	0.00038125
	ZNF695	3.13983	0.000177695		VAMP8	-2.62875	0.000382836
	CXCL14	5.87839	0.000178309		OXSM	-2.9547	0.000383907
	RRP9	2.09968	0.000179215		DYNLT3	-1.967	0.000386088
	NUP54	1.91212	0.000179551		ALAD	-1.69334	0.000390608
	NIPSNAP1	2.09281	0.000180023		ZACN	-5.20984	0.000391937
	RAMP2	3.50058	0.000180188		CLEC2D	-3.00562	0.000392583
	AMBP	6.52821	0.000180548		JPH2	-3.64324	0.000392616
	PELP1	1.86225	0.000181104		HIF1A	-2.05114	0.000393763
	FLVCR1	2.88844	0.000181245		ASAP3	-1.63307	0.000394145
	SRSF12	4.08015	0.000182441		PLBD1	-2.42969	0.000396038
	ECSCR	6.51095	0.000183301		PCYOX1	-1.98334	0.000400859
	CCNA1	5.46321	0.000183634		SYT8	-5.12328	0.000402005
	CYB5A	2.84014	0.000183651		WASH7P	-1.9961	0.000404571
	AP3B2	3.18208	0.000183821		SNX14	-1.59626	0.00040548
	ZNF281	2.60739	0.000183831		KIAA1217	-2.31412	0.000406606
	BMP4	6.01283	0.000184402		DSG3	-3.7438	0.000408442
	ERCC2	1.87973	0.000185084		ZBTB20	-2.70685	0.000408809
	TCEA1	1.98246	0.000186312		ZBTB4	-1.68277	0.000409032
	POU3F4	7.05268	0.000186346		CHMP3	-1.96006	0.000409283
	RRS1	2.74764	0.000186629		ECHDC2	-1.89931	0.000409861
	FGF8	6.26898	0.000187889		ARHGAP27	-1.69928	0.00041329
	GDF1	5.71001	0.000187895		HOXB3	-3.16675	0.000413428
	DES	4.35853	0.000188195		STAT2	-1.92529	0.000413491
	AK5	4.02833	0.00018857		DNASE1L1	-2.00388	0.000413576
	FAM71F1	7.02093	0.000188927		ZNF641	-1.70672	0.0004144
	SIT1	6.69017	0.000189357		YPEL3	-1.68818	0.000418337
	MYRF	2.87494	0.00018946		TMC4	-2.36765	0.00041854
	EXOSC5	2.48317	0.000189561		LYNX1	-2.49691	0.00041882
	TNNI3	3.89386	0.000189784		PDCD4	-2.58303	0.000419409
	MED9	2.03027	0.00019018		ZNF703	-2.85735	0.000419422
	ADAMTS8	5.77284	0.000190356		CASP8	-2.13193	0.000419549
	CA3	4.55216	0.000190808		EVI5	-2.37026	0.000424639
	DMKN	1.93197	0.00019121		ATF6B	-1.584	0.000426438
	PTGES3	2.07237	0.000191315		TCTA	-1.7829	0.000427333
	MARCKSL1	1.91493	0.00019168		GLIPR2	-1.71487	0.000428133
	MARS2	2.6421	0.000191832		LAYN	-2.43738	0.000428468
	C1orf94	7.07123	0.000192692		QRICH2	-2.38356	0.000429432
	SIPA1L2	4.00348	0.000192767		PXMP4	-2.05468	0.000431137
	CHST10	2.29829	0.000193212		CYP4V2	-2.92986	0.000431254
	XKR7	4.67393	0.000194587		SLC24A1	-2.39898	0.000432937
	PPP2R2B	3.66679	0.000194622		STARD5	-2.5035	0.000434275
	PPAT	2.57721	0.000195295		CDKN2C	-4.92816	0.000434688
	MLXIPL	3.87303	0.000195602		GTF2IRD2B	-1.87668	0.000436309
	CCDC58	2.31638	0.000196462		PIGZ	-3.84505	0.000440008
	HMGN5	2.99153	0.000196578		ASB8	-1.99976	0.000443099
	C14orf132	2.54171	0.000197522		SZT2	-1.96504	0.000444257
	GSPT2	2.08428	0.000197605		GJB3	-3.32621	0.000444424
	DEAF1	1.83408	0.00019761		ZNF665	-3.05511	0.00044495
	WNT8B	5.40966	0.000198296		GOLGA1	-2.05099	0.00044535
	C11orf96	5.7978	0.000198467		TENM3	-2.36768	0.000445446
	FGF17	5.90071	0.000198888		CPTP	-1.81307	0.000446779
	NUP93	2.05729	0.000199845		MYO1D	-2.22441	0.00044946
	ZNF80	4.72619	0.000200068		FAM53B	-1.57819	0.0004525
	PPP2R2C	4.3763	0.000200514		PRAF2	-2.00637	0.000455373
	POLR1B	2.58049	0.000200786		LRRC57	-1.70868	0.000456919
	CYP26C1	5.31241	0.000200789		LYPD5	-2.88571	0.000457655
	PCCA	2.30339	0.000200819		SELM	-2.18799	0.00045996
	C2orf61	3.50835	0.000201726		NPFFR2	-3.10604	0.000460449
	AURKA	2.66273	0.000201814		ERAP1	-1.54839	0.000460638
	SPTB	3.40728	0.00020281		TCTN2	-1.74902	0.000462337
	MTHFD2	1.75974	0.00020292		BIVM	-2.73768	0.000462587
	MRPS30	1.80441	0.000203499		AHSA2	-2.23733	0.000462763
	NFE2L3	4.23336	0.000204141		STAP2	-2.3221	0.000465552
	SHMT2	2.14114	0.00020451		SLC22A1	-4.20038	0.000466177
	SORD2P	1.95512	0.000205916		DHRS7	-1.61846	0.000468482
	TMEM59L	5.35139	0.000206701		TMEM184A	-2.9865	0.000470436
	TACC2	3.32177	0.000206964		KCTD1	-1.8756	0.000470467
	PAX6	4.77671	0.000207187		PPT2	-1.63971	0.00047139
	EARS2	1.68718	0.0002076		SLC35B3	-1.99753	0.000471496
	FAT3	4.47746	0.000207786		SP110	-2.64133	0.000472307
	RP11-162P23.2	3.7675	0.000208218		STXBP5	-2.38726	0.00047291
	SLC7A10	5.20763	0.000208396		SDSL	-3.81715	0.000476836
	ZNF48	2.32484	0.000208501		ADAMTS13	-2.23355	0.000478853
	GNL3	1.77781	0.000208595		GPX7	-2.36649	0.000480806
	PGAM2	6.78604	0.000209053		ZFYVE28	-3.84645	0.000481425
	ZDHHC2	2.53746	0.000209651		TP53INP1	-2.04097	0.000483493
	SHPK	1.99195	0.000211013		IFI30	-2.57416	0.000487054
	CLIP2	2.03397	0.000211023		XPC	-1.73239	0.000488289
	TMEFF2	6.53915	0.000211311		ABI3BP	-3.278	0.000488617
	DIRAS1	4.46329	0.000211326		KCTD12	-2.59246	0.000489317
	CCDC152	5.25938	0.000213586		TMEM121	-3.03979	0.000491017
	AMPH	6.4969	0.000213665		FRK	-2.57943	0.000491503
	PINX1	2.35722	0.0002148		ARID3A	-1.50024	0.000491786
	NOC3L	1.88225	0.000216704		ESYT2	-1.88901	0.000493703
	EMILIN3	3.3246	0.000217981		CREB3L1	-1.53452	0.000494574
	P2RX5	4.81892	0.000218726		CD68	-3.14215	0.000495338
	PAPLN	2.66376	0.000218764		LAPTM4A	-1.94731	0.000497006
	2004-09-01	3.90036	0.000218766		PLBD2	-1.55987	0.000497836
	GTF2E1	2.11621	0.000220102		PCMTD1	-2.66861	0.000498373
	NOP58	1.9277	0.00022135		EPHB6	-2.08197	0.000499773
	SLC2A3	3.23759	0.000222242		MAP3K6	-1.80608	0.000500077
	ARMC4	5.1242	0.000222316		HLA-G	-4.28389	0.000501073
	PLPPR5	5.63536	0.000224813		ODAM	-4.0791	0.000504438
	ADGRL4	6.40577	0.000225577		STAT6	-1.57947	0.000508685
	SHISA6	6.53295	0.000225961		HCAR2	-5.90127	0.000509111
	CORO2A	2.05161	0.000226565		EMP3	-2.12451	0.000509492
	TMCC2	3.86586	0.000226646		DECR1	-2.51836	0.000509821
	PDYN	6.62135	0.000227001		BHLHE41	-2.44735	0.000511612
	ZNRF3	1.88626	0.000228714		DTX3L	-2.50128	0.000511654
	ABRACL	1.93907	0.000229314		STYK1	-2.36097	0.00051276
	ZBTB12	2.05402	0.000229852		VWA1	-2.43582	0.000514767
	CSE1L	2.06528	0.000231765		FAM89B	-1.73173	0.000516528
	AMER1	2.60926	0.000232197		PERM1	-3.936	0.000518049
	LIN7A	3.21573	0.000233147		SLIT3	-3.6482	0.000523822
	CSRP2	2.93692	0.000233778		REV3L	-2.27481	0.00052627
	CD24	3.3539	0.000234718		ZNF503	-3.13175	0.000526815
	PRKAA2	3.55136	0.000234876		PBLD	-2.35105	0.000526975
	PRRX1	5.19621	0.000235674		IRAK4	-1.98011	0.000528031
	FAM155A	5.14148	0.000235961		LRRC8E	-2.22032	0.000533965
	CLGN	6.85714	0.000237738		FAM83B	-2.7305	0.000536158
	CDH8	4.20095	0.000237899		KIAA1211L	-4.57531	0.000541335
	GJC1	2.00223	0.000237904		ST6GALNAC2	-3.54083	0.000544429
	HESX1	3.38924	0.000238186		ITGA3	-2.32632	0.000545231
	SPAG5	2.99983	0.00023999		HEXA	-1.9355	0.000547893
	WRBP1	6.38318	0.000240135		FBXL3	-1.66308	0.000554152
	ELFN2	5.89188	0.000240736		P4HB	-2.03916	0.000555823
	BCL7A	2.55121	0.000241448		KIF26B	-3.04911	0.000557717
	TM4SF18	6.54139	0.000241536		SH3TC2	-4.11837	0.000561082
	ADRA2C	3.1514	0.000242929		EFNB2	-1.92312	0.000563142
	CACNA2D1	7.91285	0.000243312		RBL2	-1.97893	0.000565268
	PALM	4.20706	0.000243658		ELK3	-1.6106	0.000566703
	RTP1	6.74274	0.000244107		SFN	-3.45623	0.000567937
	ADCY1	4.26061	0.000244513		CGB7	-3.06082	0.000570953
	LITAF	2.39467	0.000244557		SLC39A7	-1.67447	0.00057353
	EFR3B	2.95204	0.000245022		PIGG	-1.75184	0.000577332
	DCX	5.71829	0.000246422		GPR78	-3.07717	0.000578078
	NPM3	2.32249	0.000246844		CTSF	-2.27599	0.000580815
	HMGB3	2.04376	0.000247083		TOR1AIP1	-1.55371	0.000581348
	COLGALT2	4.34766	0.000247802		CYB561A3	-1.57923	0.000583653
	WASF1	2.03818	0.000248521		AGAP2	-2.3802	0.000584623
	KLHL25	2.10369	0.000249039		PYGO1	-2.63913	0.000585894
	UBE2T	2.33223	0.000249324		FGF14	-4.15179	0.000587245
	PCSK1	4.92935	0.000250788		OSGIN1	-2.62534	0.000589261
	GNAL	2.24332	0.000253327		KCTD18	-2.46994	0.000592623
	MMP24	3.90768	0.000253458		MISP	-2.97896	0.000593227
	ARHGAP4	2.37466	0.000255503		FAM50B	-2.17048	0.000593401
	SLC19A1	2.89883	0.000255814		CCDC53	-2.44376	0.000593826
	PDZD2	4.44415	0.000256429		ADAM10	-1.95601	0.000594861
	CABP1	4.45936	0.000257211		SMAD7	-1.95739	0.000594885
	CSPG5	3.43851	0.000258884		ROM1	-3.0669	0.000595001
	NRN1L	3.83014	0.000259372		PLA2G4A	-3.07925	0.000596965
	LAMC3	5.5111	0.000259533		FRMD6	-2.60146	0.000597614
	MCAM	4.16049	0.000259553		GUCY1A3	-6.81271	0.000601021
	COL8A1	4.57742	0.000260127		PEAR1	-2.83143	0.00060421
	SLC25A19	2.88592	0.000260748		C4orf26	-4.74758	0.000604774
	PHLDA1	2.13932	0.000263461		CH17-360D5.1	-5.46734	0.000605766
	DEPDC1B	3.65156	0.000263802		PSAP	-2.14459	0.000606474
	RFC4	2.1217	0.000264681		PFN4	-4.79382	0.000606665
	FGF4	6.94519	0.000265235		C1orf204	-5.4036	0.000607498
	PANK1	2.62532	0.000265828		PARP4	-1.69408	0.000609683
	ACTG2	6.13433	0.000267112		MAFB	-1.87988	0.000612683
	FAM184A	5.34458	0.000267254		LAMB2	-2.30985	0.000615329
	SIX4	2.41883	0.000268029		CTD-2245F17.3	-2.87309	0.00061537
	HSPD1	2.31685	0.000268033		MAVS	-1.60528	0.000618891
	YARS	1.73736	0.000268375		LRRC29	-3.63661	0.000619312
	CHAC1	3.77611	0.000269555		SH3YL1	-1.68151	0.000622997
	SEC14L5	3.45233	0.000269881		KLF9	-3.22896	0.000629793
	TOMM40	2.24192	0.000272718		HOXC6	-4.92204	0.000632636
	GFRA1	7.05801	0.000272732		CCNG2	-3.01537	0.000632887
	USP2	4.40347	0.000273174		AMZ1	-2.96699	0.000633077
	GTF2IP4	1.94364	0.000273646		ZSWIM8	-1.74666	0.00063608
	RP11-61N20.3	6.61523	0.000274025		FOXP1	-1.79555	0.000636133
	TMEM170B	3.57013	0.000274138		KCTD21	-1.96688	0.000637496
	MPPED2	4.75668	0.000274571		PLA2R1	-2.68312	0.000641939
	LCK	2.84806	0.000274693		CLN5	-2.0703	0.000644573
	ENPP2	3.29691	0.000274836		GADD45B	-2.2635	0.000645303
	VGF	3.22012	0.000275433		TMEM168	-1.7374	0.000645826
	MYC	2.87913	0.00027569		CH17-258A22.4	-2.74942	0.000647603
	KBTBD8	4.0725	0.000276615		CD22	-3.75313	0.000648386
	C21orf59	1.85092	0.000276983		TSC22D3	-2.43301	0.000651298
	NDUFAF2	2.16792	0.000277371		TLR3	-3.10465	0.000652505
	LMO3	5.01978	0.000278205		CFAP70	-3.34363	0.000653697
	LRRN1	5.79893	0.00027884		SLK	-2.18657	0.000653928
	ABI2	1.97084	0.000278849		FOSL2	-2.58217	0.000654648
	ZNF618	2.74872	0.000279768		CIDEB	-3.05691	0.000654825
	TLE2	2.70542	0.000280282		STK19	-1.77409	0.000656899
	PPP1R17	6.75207	0.000280784		HIST1H2BD	-2.36066	0.00065997
	PRMT8	4.66657	0.000283305		CRIP2	-2.72582	0.000666498
	BRINP1	3.09118	0.000283337		WNT7A	-3.13411	0.000668341
	FXYD7	4.13118	0.000284717		HDAC11	-2.16038	0.000668753
	FAM117A	1.96935	0.000284853		ZNF440	-2.93497	0.000669911
	CCT2	1.71051	0.000284876		MT1E	-2.54478	0.000669934
	GRB7	2.41298	0.000285078		PTPN20	-3.40764	0.000670461
	CYFIP2	3.80762	0.000285211		RPS6KA4	-2.03986	0.000672367
	MAGI2	2.66065	0.000287205		PDK2	-1.73354	0.000672695
	URB2	3.47117	0.000287485		FBN2	-2.44107	0.000672886
	CHEK1	1.92358	0.000288048		TMCO3	-1.6261	0.000674214
	PRIM1	3.09151	0.000288396		CHPF2	-2.86221	0.000674341
	KIRREL2	4.08789	0.0002884		ZDHHC7	-1.59807	0.000678597
	SGO1	2.996	0.00028851		TMX4	-1.67737	0.00067884
	NCAM1	3.42622	0.000289118		ANKRD35	-2.32192	0.000681087
	PPM1B	1.98328	0.000289967		SERINC3	-1.58545	0.000684123
	LAS1L	1.67985	0.00029027		PHLDB3	-2.38616	0.000685488
	IPO9	1.64048	0.000290351		INO80B	-1.80263	0.000689
	TEK	2.57639	0.000292254		EBF4	-2.32339	0.000689447
	RASGRP4	4.94157	0.00029257		EPGN	-3.55295	0.000690631
	SORBS2	3.95577	0.000292901		PLEK2	-3.48462	0.000692339
	LYPLA1	1.91897	0.000294076		SLC38A1	-2.07192	0.000694768
	TMEFF1	8.62699	0.000294887		EDEM1	-1.59634	0.000695289
	EIF4E	1.7353	0.000295175		TNFRSF10C	-1.85732	0.000695372
	NUDT15	2.25077	0.000295604		NBPF10	-2.2254	0.000695595
	RHPN1	2.45555	0.000296006		PPP2R3A	-2.22512	0.000695606
	GRM2	5.14922	0.000296787		ADRA1B	-4.45852	0.000696357
	SUSD4	5.37404	0.000296933		ARHGEF10L	-1.88432	0.000698851
	SLC25A33	2.56438	0.000297455		MED15	-1.69518	0.000700496
	CELSR3	2.80527	0.000297637		CRIP1	-3.85638	0.000701061
	PHC1P1	4.09279	0.000297876		NEDD4	-1.95904	0.00070286
	CUZD1	4.36806	0.000297961		SLC9A7P1	-2.84456	0.000703866
	BCL2L12	2.16828	0.000302506		RNASE1	-4.32389	0.000704134
	TBC1D31	2.17374	0.000303222		ERP27	-3.36874	0.00070463
	HS3ST4	6.53207	0.000303817		SLIT2	-2.75701	0.000707826
	CA11	2.36138	0.000303919		ZNF491	-4.0812	0.000708059
	DCAF13	1.68182	0.000303933		RNF103	-2.13644	0.000709542
	MAATS1	5.14682	0.000304446		PER3	-1.90602	0.000709942
	C9orf129	6.62732	0.000305749		GBAP1	-2.22554	0.000711885
	GEM	6.20666	0.000307772		XPNPEP2	-3.49709	0.000713734
	C16orf96	4.96508	0.000308713		COL4A4	-2.86557	0.000716362
	FILIP1	4.20542	0.00030977		SLC16A7	-2.76231	0.000718989
	RNF130	1.84445	0.000309911		INPP5D	-1.62392	0.000720008
	LRP4	3.89253	0.000310188		C1QTNF3	-3.54779	0.000720315
	CHCHD3	1.82994	0.000312826		SAP30L	-1.6819	0.000722505
	HDAC5	1.91878	0.000312991		TMEM40	-4.25903	0.000722791
	FAM136A	1.63209	0.000313148		FNDC3B	-2.13859	0.000723236
	GRHL3	4.98324	0.00031437		ADCK5	-1.96525	0.000725852
	RBM14	1.94953	0.00031642		SLC39A11	-1.99192	0.000730638
	RP5-862P8.2	3.4189	0.000316442		KRT7	-3.69205	0.000733417
	SLC16A1	1.96433	0.000317716		DENND1B	-2.13224	0.000735546
	EFNA3	2.19354	0.000318009		ADGRF4	-3.9538	0.000739028
	MCU	1.66885	0.000318225		CANT1	-1.58222	0.000739312
	GJC3	5.19349	0.000318263		IGIP	-4.46526	0.000739534
	TRNP1	2.36361	0.000318728		DUOX2	-4.0602	0.000740878
	KLHL13	4.70615	0.00031939		SH3TC1	-3.2169	0.000743783
	TRMT1	1.68677	0.000320497		FAM127A	-1.73629	0.000747267
	NUDT21	1.71141	0.000320661		KDELR3	-2.36398	0.000750729
	IRX2	1.80289	0.00032125		FOLR1	-3.26244	0.000751527
	DOC2A	4.20378	0.000322862		LRRC17	-3.94906	0.00075581
	TNFSF11	5.85321	0.000323133		UFL1	-1.96014	0.000756264
	NOP56	1.80674	0.000324028		ZNF843	-3.63962	0.000759445
	ATP8A1	3.87694	0.000324289		PTK2B	-2.22369	0.00076022
	PTENP1	6.2351	0.000324544		PLAC8	-3.89515	0.000760363
	STOX1	4.48385	0.000327139		REPS2	-2.01302	0.000762342
	MCM6	2.98435	0.000327817		PCDHGA6	-2.78448	0.000764677
	AIF1	6.19064	0.00032802		PPP1R13L	-1.60807	0.00076604
	CRKL	1.61858	0.000328319		DCAF6	-1.52999	0.000771145
	POLR2D	1.57077	0.000328813		FAM214A	-2.16513	0.000775499
	COMMD10	1.78798	0.000328929		P3H3	-1.90383	0.000777502
	RCC1	1.80075	0.000328974		LGR5	-4.21925	0.00077817
	POLR3K	2.10905	0.000329126		EML3	-1.60642	0.000779939
	NCAPD3	1.81541	0.000329517		DIRC3	-3.77971	0.000784481
	SOX8	5.67751	0.000332627		GALNT2	-1.97991	0.000784745
	SYNGR3	2.53981	0.000334357		SLC22A18	-2.33575	0.000784748
	WASF3	2.00601	0.000335617		IQCA1	-2.01446	0.000790915
	TUB	1.7321	0.000337268		TET2	-2.21966	0.000790998
	MRS2	2.18177	0.000338786		TGOLN2	-1.7887	0.000794101
	PNO1	1.98039	0.000339036		RNF170	-1.85712	0.000806048
	RP11-141O19.1	6.20696	0.000340645		TM9SF1	-1.54986	0.00080716
	CENPVP1	6.20696	0.000340645		PSG9	-5.0266	0.00081576
	TRAF5	2.7487	0.000342701		CES4A	-2.37329	0.000816928
	AMD1	2.47979	0.000343594		ACADVL	-1.90233	0.00081912
	XPO5	1.84739	0.000343743		MDM2	-1.59615	0.000825019
	CA2	2.61781	0.000344074		RBMS2	-1.62047	0.000826884
	CYP4X1	5.35352	0.000344153		TMEM263	-2.07276	0.000827646
	EEPD1	4.17548	0.00034669		RHOBTB2	-1.62462	0.000827765
	PGD	2.07552	0.000347416		CAMTA2	-1.64318	0.000830896
	LGALS12	5.18261	0.000347657		TMEM256-PLSCR3	-1.50206	0.000847052
	FSTL4	3.65105	0.000348497		SPINT2	-1.76632	0.000847344
	CCDC138	2.51662	0.00034861		IL2RB	-2.81204	0.000852545
	GCH1	3.17987	0.000351746		SCYL3	-2.10295	0.000853097
	ZNF90	3.18928	0.000353219		PTCHD3P1	-2.88995	0.000856009
	GRM3	6.38489	0.000354393		NUDT19	-1.87843	0.000856412
	ABCC4	3.9063	0.000355623		MYH14	-1.91288	0.00085696
	TRPC6	5.49572	0.000356228		NBPF8	-2.88001	0.000861197
	CDCA7	5.22856	0.000356817		CUEDC1	-2.21387	0.000861586
	RGS2	2.84853	0.00035985		RP11-96C23.11	-3.97323	0.000863393
	TMEM183A	2.0851	0.000360741		KRT223P	-4.57223	0.000867499
	GDPD2	5.01207	0.000360931		PLCD1	-2.35929	0.000869431
	DCAF12L2	6.15566	0.00036264		PTGFR	-5.06787	0.000870417
	NUFIP1	1.96653	0.000363773		RIN1	-2.01599	0.000871064
	EPCAM	2.55991	0.000364087		LTBR	-2.0584	0.000875051
	HPSE2	6.15062	0.000364669		ROBO3	-1.5796	0.000875792
	RBM24	6.51545	0.00036469		DHX58	-2.64629	0.000876259
	RRP15	2.30206	0.00036475		CAPN3	-3.36629	0.000883041
	APOA1	6.94332	0.000367853		FKBP11	-1.86761	0.000884363
	PTMA	2.64315	0.000368198		CPQ	-2.06312	0.00088519
	PLEKHA4	2.71923	0.000370215		LRRC37A3	-2.42256	0.000885934
	PNMA6A	3.73644	0.000370321		RNF13	-1.73726	0.000886321
	SEH1L	1.74983	0.00037042		APOL1	-3.99932	0.000886523
	C16orf89	5.81889	0.00037047		CBX4	-1.82261	0.000888266
	MSH6	1.69001	0.000370522		PDLIM4	-2.31051	0.000893292
	HDAC2	1.81934	0.000370772		FGD3	-2.30379	0.000899209
	SHC2	5.45825	0.000370833		TGM1	-2.83193	0.000902817
	GLI1	4.80677	0.000372859		CAV1	-3.07398	0.000903804
	MAP2K6	2.91689	0.000373256		APPBP2	-1.61184	0.000908415
	CDHR1	5.77506	0.00037341		TNK1	-1.70528	0.000909364
	SNTB1	4.48282	0.000374788		TMEM14A	-1.71418	0.000915654
	TNNT2	2.41516	0.000375724		TMEM86A	-2.50941	0.000917501
	HAPLN4	6.07281	0.000376798		RWDD2B	-1.93741	0.000919419
	TMEM98	2.09502	0.00037763		TMEM265	-3.07995	0.000920995
	PTPN13	2.59567	0.000380883		CDC42EP5	-2.59113	0.000922155
	HACL1	1.74702	0.000381474		INAFM1	-1.94012	0.000925639
	LMX1A	6.65242	0.000382337		LYRM2	-1.57267	0.000936097
	SLIT1	5.59297	0.00038455		AQP3	-2.07628	0.000938321
	MCM2	3.33025	0.00038466		TMEM106A	-2.1825	0.000945566
	TTLL12	2.03467	0.000387878		USP47	-2.05599	0.000948968
	BEX5	4.61512	0.000388151		MPC1	-2.29684	0.000949058
	SLC22A31	4.37454	0.000388827		CHIAP2	-5.16891	0.00094937
	FAM19A4	6.31548	0.000389293		BORCS7	-2.51941	0.00094946
	CCNB1	3.27385	0.00039046		BAIAP2	-2.05757	0.000951063
	CSMD2	5.35482	0.000390982		NTN4	-2.85229	0.000952602
	DBF4B	2.09051	0.0003911		SYT17	-1.80556	0.000957052
	SLC25A29	2.19441	0.000394015		EFS	-1.52776	0.000958957
	DHX15	1.58478	0.000394672		BTBD6	-2.04826	0.000960407
	KAT7	1.53038	0.000396248		GPR87	-3.60974	0.000960456
	PLK1	4.07763	0.000396264		RAC2	-2.83129	0.000961307
	ASMTL	2.05146	0.000396284		SLC12A4	-1.85171	0.000962513
	MCF2L	2.48652	0.000396728		TMEM131	-1.74367	0.000962562
	SLCO1A2	4.38708	0.000397338		PGAP3	-1.71711	0.000963209
	CCDC136	2.42732	0.000399315		GPR155	-3.34588	0.00096444
	DGKK	5.11916	0.000399635		ZNF676	-4.34642	0.000973968
	CASKIN1	4.02041	0.000400156		ZNF800	-2.00549	0.000976862
	FAM129A	4.68594	0.000400583		PARP10	-2.72643	0.000977325
	SLC25A13	1.77205	0.000402182		LEPROT	-1.58273	0.000977734
	GFY	5.03657	0.000403039		TRIM68	-1.91237	0.00098055
	CTD-2537I9.19	6.41975	0.000403542		KLF6	-1.59664	0.000982335
	FBXO46	1.67688	0.000405353		SECISBP2L	-1.8579	0.000983361
	ROBO2	3.38762	0.000406741		S100A11	-2.53004	0.000989441
	PGK1	2.23059	0.000406753		MAGED1	-1.76059	0.0009912
	FKBP5	2.90124	0.000411157		HOXB4	-4.55493	0.000994389
	KCNJ4	6.08316	0.000411857		OR7E91P	-4.28216	0.00099708
	NRTN	3.6227	0.000412598		MPPE1	-1.76432	0.000998517
	ISYNA1	2.20643	0.000414218		LRRC23	-2.49695	0.00100099
	PPM1G	1.61776	0.000414417		CD55	-1.62648	0.00100614
	RAB39A	4.58239	0.000414445		TAB3	-1.9216	0.00100733
	HEYL	4.30196	0.000414846		TAGLN2	-2.189	0.00101047
	GSR	1.81238	0.000416435		S100A16	-2.60648	0.00101885
	OTX1	6.80163	0.000417707		IFI27	-3.79617	0.00101986
	RAB3A	2.40369	0.000421511		KCNE4	-3.77807	0.00102781
	FAM189A1	3.96719	0.000421517		SHISA4	-1.93784	0.00102971
	F2RL1	4.22973	0.000422541		ZCCHC6	-2.00754	0.00102996
	TTC9	3.36728	0.000422865		PARP6	-1.55122	0.00103205
	SCLY	1.85039	0.000424696		GOLGB1	-2.33209	0.00103797
	CXCL6	6.12994	0.000425351		CRABP2	-2.29868	0.00104104
	DPYSL4	3.61224	0.000426185		SGSM2	-1.647	0.00104339
	ATP6V1G2-DDX39B	4.97419	0.00042821		RP1-130H16.18	-5.33133	0.00104443
	TOX2	5.20895	0.000429792		ERVV-1	-4.58591	0.00104636
	ELAVL3	5.33157	0.000432846		GOLGA2	-1.5436	0.00105111
	CCNJ	2.22691	0.000433471		PEX6	-1.53586	0.00105228
	BTF3L4	1.67327	0.000433489		NFKB1	-1.63891	0.00105249
	LCTL	3.81686	0.000433551		CDRT1	-4.27771	0.00105746
	KCNS3	4.62598	0.000435944		FAM65A	-1.98707	0.00105781
	SEMA5B	5.51099	0.00043627		HLA-B	-1.80579	0.00105927
	ZBTB39	1.97322	0.000436763		RANBP17	-1.67781	0.00105964
	PPM1N	3.12614	0.000437015		FCHSD1	-1.59967	0.00106034
	DDX11	1.8271	0.000437414		NOG	-2.9836	0.00106579
	DEK	2.47613	0.000437655		EDA2R	-1.88896	0.00106743
	CNIH2	2.13592	0.000438542		LGALS9B	-4.86334	0.00107217
	STK39	1.98313	0.000439236		CATSPER1	-4.6781	0.00107417
	LRRC8C	4.65916	0.000439741		FKBP10	-1.84937	0.00107851
	EHMT2	1.54426	0.000440356		APOL6	-2.98492	0.00108209
	GTPBP4	1.55761	0.0004408		KLF12	-2.25285	0.00109767
	TFAM	1.74031	0.000440905		MAN1A2	-1.928	0.00110779
	PSRC1	2.91343	0.000441052		SLAMF8	-3.46239	0.00111146
	ITGA2B	3.02524	0.000441088		GGT5	-3.3223	0.00111353
	CYSTM1	2.71321	0.000442929		DSG1	-5.5272	0.00111614
	SULT4A1	4.72991	0.000444748		CCDC159	-1.94432	0.00112145
	B3GNT7	2.17694	0.000447818		CCDC69	-2.45871	0.00113032
	PNMA3	4.38547	0.000449282		IFIH1	-3.02328	0.00114027
	GULP1	1.68285	0.000449379		DGKB	-3.28797	0.00114081
	IRX5	6.52065	0.000454064		UEVLD	-1.72931	0.00114721
	TAC3	3.90263	0.000454785		BMI1	-1.7103	0.00115432
	FAM78B	4.6173	0.000455566		COG6	-2.10105	0.00116584
	GART	1.65379	0.000455645		CXCL16	-3.06747	0.00116976
	PCDHAC2	5.99957	0.000456376		MGST2	-1.94014	0.00117022
	CCDC88A	2.82051	0.000458722		ZNF208	-4.60438	0.0011766
	PDE1B	4.81182	0.000458889		DNAH1	-2.81974	0.00118212
	CBARP	2.29101	0.000459188		SULF2	-3.29891	0.00118728
	BYSL	1.92838	0.000459943		ALG14	-1.98513	0.00118751
	MED12L	7.19595	0.000460245		LIN7B	-2.41176	0.0011883
	PARM1	7.31046	0.00046107		CTDSP1	-1.67431	0.00118832
	C19orf81	6.42699	0.000461877		ANKRD13A	-1.78029	0.00119013
	SNTG2	6.21821	0.000462106		TSPAN3	-1.65279	0.00119193
	HN1	1.77997	0.000463286		RNF6	-1.82924	0.00119218
	NLE1	1.82023	0.000464119		COL1A2	-3.70209	0.00119503
	PROSER1	2.01848	0.000464702		ZNF257	-3.8246	0.00119713
	DHRS3	2.46122	0.000466196		TTLL2	-4.5433	0.00120141
	RBMX	1.8919	0.000467164		SGPP1	-1.61128	0.00120206
	TFPI2	3.08404	0.000469367		SLC35D1	-1.59743	0.00120404
	GPC6	5.35833	0.000469686		ERMARD	-1.89386	0.00121258
	ZBTB18	2.01867	0.00046998		ASCL2	-4.18753	0.00121642
	RFWD3	2.04551	0.000473388		FAM129B	-2.08809	0.00122027
	RIOK1	1.85829	0.000473486		ADGRA2	-2.07718	0.00122079
	RPF2	2.13338	0.000475621		CD36	-2.55233	0.00122131
	SH2D2A	4.27479	0.000476047		KDELR2	-1.72211	0.00122133
	SPSB4	8.12089	0.000479087		SYNC	-3.3757	0.00122325
	CKS2	2.34062	0.000480888		AZIN2	-2.8396	0.00122394
	TESMIN	3.45702	0.000482485		ADPRH	-2.24604	0.0012255
	SMYD5	1.80176	0.000484957		STRA6	-2.0584	0.00122938
	SMNDC1	1.53821	0.000486667		BBS5	-2.09823	0.00122997
	GRASP	4.45891	0.000486817		TRIM16	-1.96193	0.00123183
	GPR3	3.91325	0.000487179		B3GNT8	-2.473	0.00123659
	PPP5C	1.59332	0.000487463		TXNDC15	-1.53441	0.00124087
	ORC6	2.11975	0.000488965		ERLEC1	-1.59405	0.001241
	BICD1	2.65979	0.000489479		RAPGEF3	-1.83341	0.00124204
	TRERF1	1.82223	0.000490114		TMEM2	-2.14271	0.00125084
	CPEB1	3.54653	0.000490197		MOB3C	-2.54116	0.00125109
	TAF6	1.62632	0.000491505		TP53I13	-1.8998	0.00125593
	POU3F2	6.10068	0.000493491		IAH1	-2.12728	0.00125644
	PRRG3	4.1742	0.000493966		FOXO3	-1.54488	0.00125811
	ZNF775	1.75662	0.000494216		SH3GLB2	-1.77811	0.00126045
	MMP1	7.46063	0.000495283		WDR78	-2.91959	0.00126231
	PDLIM3	4.16748	0.000498073		SEMA3B	-1.69277	0.00126313
	MAP4K1	4.8816	0.000498701		CA5B	-1.74173	0.00126698
	SYT7	2.98065	0.000501875		IER5	-1.54398	0.0012705
	C17orf53	2.47214	0.000502401		ARHGAP40	-3.43038	0.00127548
	TNFRSF11B	5.04406	0.000503111		MYO15B	-1.96996	0.00127674
	STEAP1B	4.48537	0.000503189		GTF2IRD2	-2.34671	0.0012774
	RNPS1	1.74334	0.000504462		C22orf46	-2.31128	0.00128276
	HRASLS	4.84746	0.000504762		SPR	-1.72649	0.00128336
	DNER	3.82238	0.000505244		GBGT1	-1.80365	0.00128703
	SULT1C4	5.24621	0.000505361		ZNF667	-2.31542	0.00128892
	HEATR1	1.98612	0.000506015		ADAMTS9	-2.74601	0.00129668
	PURG	6.40251	0.000506073		HIPK2	-1.93958	0.00130737
	ZNF826P	2.40506	0.000506271		RRBP1	-1.79271	0.00131036
	HLA-DRA	6.08815	0.000506484		WWTR1	-1.61635	0.00131638
	HNRNPC	2.04582	0.000506617		SAMD9L	-5.07175	0.00132941
	CENPW	2.66296	0.000507279		DNAJC3	-1.73391	0.00133885
	DDX39A	1.94443	0.000510459		LRRC56	-2.4106	0.00134525
	PHF5A	2.05976	0.000510652		S100A10	-2.00096	0.00134526
	IPO4	2.15821	0.000510871		PURA	-1.96759	0.00135751
	DLEU7	6.20879	0.000512231		MEGF6	-2.08692	0.00135896
	BRIX1	1.871	0.000515545		SHOX	-3.9879	0.00136113
	CPNE4	6.15004	0.000516137		KIFC3	-2.07222	0.00136232
	MAP1S	1.85019	0.000516414		PLPPR2	-1.84351	0.00137099
	CENPQ	2.14861	0.000518377		INPP4B	-2.65734	0.0013771
	SP4	3.19926	0.000520596		DBNL	-1.5448	0.00138213
	MYO5C	3.81168	0.000521022		LRPAP1	-1.619	0.00138723
	RPRD1A	2.15056	0.000521367		RP11-514P8.6	-2.71493	0.00138986
	SYT6	3.99778	0.000521495		WASH2P	-1.53578	0.00139664
	DPPA3	6.21096	0.000524824		SERHL2	-2.15894	0.00140021
	ADGRB1	3.06807	0.000525758		FAM73A	-2.03577	0.00140588
	SNRPG	2.1759	0.00052789		KLHL35	-2.63013	0.00140765
	ASB2	6.21598	0.000528374		CYP2W1	-4.25571	0.00141007
	SOGA3	3.17391	0.000531216		PEX11G	-2.29939	0.00141519
	HHIP	4.31885	0.000533009		PLCD3	-2.40887	0.0014211
	NUP205	1.8723	0.000533134		PIP4K2C	-1.50847	0.00143218
	BDH1	2.30572	0.000533443		ZNFX1	-1.95408	0.00143415
	TMEM160	1.66647	0.000533906		FAM110A	-1.64563	0.00143475
	CHRNA5	2.43657	0.000536249		PLEKHG1	-2.45671	0.00143635
	SNRPF	2.59471	0.000536266		OLFML3	-2.19321	0.00144658
	DOCK11	2.84867	0.000538189		COMMD8	-1.9329	0.00145723
	PCDHGC4	4.30625	0.000540209		XRN1	-2.07851	0.001458
	PCDH18	3.22419	0.000541467		PXDN	-2.1087	0.00146079
	ACAT2	1.72742	0.000544224		RHBDL2	-2.5842	0.00146436
	NFE2	4.21222	0.000544353		KIAA0895	-2.5095	0.00146739
	COA1	1.71483	0.000545174		MROH1	-1.89823	0.00146955
	CKS1BP3	3.57938	0.000549491		LBX2	-2.92264	0.00147019
	JPH1	3.49467	0.000550487		ARHGAP18	-2.02053	0.00147342
	AC255361.1	2.80354	0.000550623		TRIM56	-1.95381	0.00147562
	RTN3	1.56818	0.000552345		CLEC3B	-4.11744	0.00148085
	NHLH2	4.87447	0.000554094		ACOT1	-2.10369	0.00148238
	GEMIN5	1.72635	0.000555457		CAMK2D	-1.73946	0.00148752
	RNASEH1P1	5.95645	0.000559134		CDNF	-3.5934	0.00148872
	ITGA4	5.17816	0.00056183		PCDHGB5	-2.75797	0.00149175
	C1QTNF5	5.05856	0.000563024		TMEM234	-1.76413	0.00149963
	ANKRD40	1.62459	0.000564236		GAA	-1.72565	0.00150349
	KIAA1524	2.34984	0.000564321		DSP	-1.79029	0.00151022
	TBRG4	1.70107	0.000565801		RNF149	-1.53378	0.00151122
	PPARGC1B	3.7888	0.00056639		IFIT5	-2.05542	0.00151914
	NACC1	1.98774	0.000567741		PTPN21	-1.5939	0.00152678
	PCOLCE	1.97303	0.000570793		DNAJC15	-2.31211	0.0015274
	DMRTA1	3.03613	0.000571061		LYSMD4	-1.73176	0.00152836
	GOT1	1.57044	0.00057252		MAN1A1	-2.7947	0.00152907
	VBP1	1.81125	0.000572788		GARNL3	-2.6203	0.00153634
	PLPP7	4.37469	0.000573351		CBR3	-2.81942	0.00154447
	SEL1L3	1.53859	0.000574688		CD163L1	-4.74252	0.00154543
	TCF7L2	1.67734	0.000574867		TBC1D3B	-3.25913	0.00155261
	LARS	1.79015	0.000575061		DCN	-4.4813	0.0015559
	SHANK2	3.14502	0.000575946		QPCT	-3.04028	0.0015646
	SLC44A4	4.83399	0.000577063		PRSS50	-3.16697	0.00156478
	GOT2	1.60565	0.000583784		MAP3K7CL	-2.66783	0.00157236
	FZD9	5.27942	0.000584663		OBFC1	-1.80825	0.00157327
	TICRR	2.84894	0.000586106		SPSB3	-1.51783	0.00158623
	SUSD3	3.99792	0.000586839		NRG4	-3.65853	0.00159145
	NETO2	2.26716	0.000588224		SH3BP5	-1.73226	0.00159463
	DLAT	1.54398	0.000588253		MORC4	-1.6917	0.00159679
	PTCH1	2.48015	0.000588961		TMPRSS11E	-3.04993	0.00160695
	TXLNG	2.14729	0.000590974		KLHDC1	-3.19986	0.00161585
	SYNJ2	3.50507	0.000593322		ADAM15	-2.07992	0.00162215
	USP46	1.69707	0.000595066		MAP3K2	-2.04523	0.00162257
	ZSWIM5	3.91725	0.000596361		RPS9P1	-3.76101	0.00162637
	FGF11	1.99281	0.000596898		CNTN3	-4.5763	0.00163014
	TMOD1	4.78249	0.000597689		KRT19	-3.28308	0.00163286
	JAM2	3.23555	0.000597856		RP9P	-3.38155	0.00164365
	MTMR12	1.74663	0.000601836		ENTPD5	-1.73894	0.00166056
	RP11-382A20.3	1.82863	0.000606018		TEAD3	-1.52216	0.00167622
	BARX1	4.95935	0.000607435		RPS6KA2	-1.50795	0.00167642
	DPH6	2.15819	0.000608735		MOB3A	-1.57377	0.00168311
	HDHD2	2.02337	0.000611361		SPSB1	-1.86984	0.00168631
	DHCR24	2.31028	0.000611571		RAB31	-1.70212	0.00168939
	MAP1LC3C	3.80877	0.000611927		ACOT2	-1.56354	0.00169058
	SLC52A3	4.12138	0.000612571		FKBP9P1	-3.4571	0.00169193
	SLC12A7	2.72404	0.000612956		DDIT3	-2.20699	0.00169227
	CBL	2.10563	0.000617605		AGPAT2	-1.51957	0.00169539
	UGT3A1	5.15333	0.000617672		SPTBN5	-2.50162	0.00169738
	GCAT	1.94465	0.000618417		TCEAL3	-1.7662	0.00169793
	HSPA12B	3.56897	0.000618471		ITGB1BP1	-1.80648	0.00169883
	GRAMD1A	1.53685	0.00061917		BCAR3	-1.66596	0.00170078
	RNF2P1	5.87386	0.000619733		MGAT1	-1.64587	0.00171043
	DNAJC6	2.94077	0.000620502		IKZF2	-2.19774	0.00171525
	TIE1	6.21942	0.000624121		ARHGAP21	-1.97714	0.00172311
	RGS7	5.00744	0.000625944		RNH1	-1.59249	0.00172869
	FBXO10	1.84618	0.000626126		ATP6AP2	-1.53373	0.00173365
	TUBB2A	2.03682	0.000626304		TNS4	-3.88815	0.00173425
	PDGFRA	7.14674	0.000626817		BORCS6	-1.93992	0.00174143
	GCA	2.0048	0.000627311		FAM3C	-1.67827	0.00174565
	FAM222B	1.72522	0.00062757		FAM105A	-1.99289	0.00175006
	SLC47A1	3.87702	0.000632025		SPHK1	-2.431	0.00176098
	FOS	2.1911	0.000632124		THEM6	-2.02936	0.00176355
	OR2A20P	4.64444	0.000633904		NAALADL1	-2.24701	0.00177613
	FAM234B	2.02661	0.000635107		DNAJB2	-1.65974	0.00177964
	KHSRP	1.87163	0.000636169		CBX6	-1.73192	0.00178483
	PAQR9	5.79711	0.000636836		MB	-2.20908	0.00178509
	OXNAD1	2.02459	0.000636911		TNS2	-1.97891	0.00179294
	CACYBP	1.80964	0.00063954		FKBP14	-1.95492	0.00179375
	SAMD1	1.62664	0.000641056		NOD2	-2.86684	0.00180226
	C2orf40	5.81016	0.000641316		C10orf54	-4.03471	0.00180397
	GALNT16	2.91218	0.000642798		CASC4	-1.52122	0.00180631
	CXCL5	5.08132	0.000644021		PXDC1	-2.55669	0.00181427
	CHST2	2.89519	0.000644224		KLF5	-1.82264	0.00183691
	PPAN	2.07103	0.000644369		TMEM262	-2.9819	0.00184264
	HRK	4.23765	0.000646228		APPL2	-1.66759	0.00184758
	NSMCE4A	1.7215	0.000646277		TMEM5	-1.7987	0.00186423
	RP11-308D16.2	2.31506	0.000649876		ST6GALNAC1	-4.72662	0.00188875
	SOX11	2.2395	0.000650069		HEMK1	-1.5491	0.00189111
	NEMP1	1.63309	0.000653949		IER3	-1.94922	0.0018954
	MFSD2A	5.17807	0.000658012		FURIN	-1.61909	0.00190676
	RP11-474G23.1	2.77864	0.000659216		RP11-295K3.1	-2.43571	0.00190853
	OR7E12P	5.19651	0.000659357		TMED10	-1.53465	0.00191549
	PRMT5	1.62311	0.000660041		RND3	-2.04986	0.00191788
	LARP1B	1.78522	0.000660686		CSAD	-2.23547	0.00192603
	C1orf54	2.41097	0.000661841		RP11-75L1.2	-5.3832	0.00192887
	GSPT1	1.56038	0.000662169		SLC31A2	-2.61875	0.00193004
	CHRNA4	6.28511	0.000662671		PQLC1	-1.64275	0.00194601
	LRRC20	1.9485	0.000665998		RYR3	-3.27974	0.00195701
	SNRPD1	2.18314	0.000668057		DUSP18	-2.39136	0.00195758
	PDGFA	1.62953	0.000668323		AGAP7P	-4.30948	0.00196122
	ATL2	1.73318	0.000668625		THEM4	-1.81822	0.00196185
	YEATS4	1.71433	0.000668755		KIAA1755	-3.06213	0.00196299
	ADAMTSL1	5.2817	0.000675195		LRP1	-2.0025	0.00197569
	ELAVL4	5.82976	0.000675564		GOLGA6L4	-3.43363	0.00198151
	NUP188	1.73378	0.000675641		GNG13	-3.38928	0.00198665
	ENO1	2.76643	0.000675931		LGR6	-1.92637	0.00199432
	GRIA1	5.12094	0.000677009		ZNF572	-4.54804	0.00200625
	SOX5	4.90744	0.00067746		PYROXD2	-1.70864	0.00200867
	PNPLA3	5.16709	0.000677825		PIGX	-1.59244	0.00201507
	SHISA3	5.94812	0.000679479		FAM111A	-1.95617	0.0020259
	PUS7	2.38161	0.000681098		CNPY4	-1.74128	0.00202677
	C1orf226	2.27119	0.000684357		WDR45	-1.53379	0.00202987
	FXN	1.85732	0.000685585		XXbac-BPG246D15.9	-4.62913	0.0020319
	STC1	2.85249	0.000686412		ZNF540	-3.40553	0.00203915
	RAVER2	2.21278	0.000686695		DENND2C	-2.06109	0.00204243
	ZSWIM4	2.88689	0.000687044		ZNF823	-2.4774	0.00204283
	POLRMT	1.57434	0.000687335		RHOC	-2.27209	0.00205142
	RBM15	1.79233	0.000688648		TMEM179B	-1.50076	0.00205278
	CFAP77	6.03763	0.000689659		ABHD16B	-2.39292	0.00206811
	SOX1	5.80884	0.000696016		SPTBN1	-1.74759	0.00207817
	NR4A1	3.65681	0.000696935		C12orf75	-1.60446	0.00208042
	NOS1	3.5188	0.000697524		KIAA1161	-1.95094	0.00208958
	CACNA1I	6.11084	0.000698443		FRMD8	-1.65748	0.00209194
	PIP4K2A	2.33722	0.000699092		CKAP4	-1.68425	0.00210662
	PRKAR1B	1.67261	0.000702076		GPAT2	-3.32793	0.00211257
	EDNRA	5.42463	0.00070209		ADGRE5	-2.47618	0.00211385
	ZNF876P	2.86175	0.000711033		WDR5B	-1.91544	0.00212473
	CYTL1	6.08995	0.000711318		SLC2A8	-1.63755	0.00212508
	HNRNPH3	1.81894	0.000711473		CASP7	-1.67963	0.00212747
	RNF122	2.30915	0.0007127		C7orf31	-2.32098	0.00213273
	GRIK3	6.21415	0.000717562		ALPP	-4.20075	0.00213308
	STAR	4.5344	0.000719516		SERTAD4	-1.78287	0.00213774
	KCNA1	5.79922	0.000720018		TCTN1	-2.05095	0.00214427
	NTF3	4.8163	0.000720235		CLU	-3.14413	0.00215034
	ALOX5	4.25327	0.00072096		PEX11B	-1.61268	0.0021519
	PSPC1	1.7895	0.000721329		SLC16A3	-1.95014	0.00215344
	TSPEAR	5.7585	0.000722018		B4GALT7	-1.55362	0.0021543
	TBC1D8	2.91904	0.00072436		MORN3	-2.80446	0.00217498
	CDH6	4.48451	0.000727121		TAP2	-1.78107	0.00217743
	RAD54L	3.14216	0.000728875		XPA	-2.04908	0.00217992
	NAE1	1.78704	0.000729085		HIST1H2BC	-2.4788	0.00218782
	KPNA2	2.60822	0.000730104		HDHD3	-1.5356	0.00218791
	GOLT1A	4.06534	0.000730678		ZNF439	-4.6887	0.00219333
	CNRIP1	5.70741	0.000732056		MFAP2	-1.85777	0.00221137
	TMCC3	4.21046	0.000733753		CDKN2B	-2.87896	0.0022237
	TMEM145	4.24466	0.000733903		TNS3	-1.81538	0.00224601
	NUP160	1.50668	0.000739884		ZNF83	-1.64655	0.00224894
	ADH5	1.58438	0.000740508		ARL6IP5	-1.71622	0.00225254
	MRPS6	1.57654	0.00074354		AC007325.4	-2.21402	0.00225367
	TNMD	5.73177	0.000743876		LENG9	-1.74495	0.00225603
	CCNB1IP1	2.37314	0.000744358		GPR157	-1.89908	0.00226084
	LMNB2	2.26717	0.000748813		NABP1	-2.01678	0.00226185
	TDRKH	1.83317	0.000754079		LMF1	-1.70545	0.00226211
	CHST13	5.87009	0.00075862		FZD1	-1.86882	0.00226246
	OXCT2P1	5.76841	0.000764392		SMTNL2	-2.65101	0.00226336
	BAIAP2L2	2.63799	0.000764511		SPATA9	-4.28063	0.00227318
	RNF165	3.08134	0.000765698		L3MBTL4	-2.56395	0.00227358
	CECR1	1.68267	0.000768946		ZNF446	-1.69621	0.00227651
	DEPTOR	3.50807	0.000772766		TICAM1	-2.3455	0.00228233
	MCM4	1.85211	0.000774207		FKBP7	-2.41783	0.00228507
	WDR3	1.55678	0.000774663		PPP3CA	-1.51708	0.00229783
	ADAMTS20	6.42951	0.00077559		NAPEPLD	-1.99802	0.00230028
	SDC2	2.67253	0.000776078		OAS1	-3.74927	0.00230961
	FBXO5	2.22233	0.000780723		CALCOCO2	-1.60047	0.00231885
	POLE2	2.97996	0.00078336		ITPKB	-1.8007	0.00232035
	SLC16A10	4.74698	0.000784661		OAZ3	-2.72026	0.00233294
	GLYATL1	4.48156	0.000791131		BTN3A3	-2.57576	0.00233691
	MRPL11	2.42434	0.000792774		C1orf53	-2.71868	0.00236137
	PISD	1.73021	0.000795606		PRNP	-1.78972	0.00237288
	BCCIP	1.6372	0.000797295		MMP14	-2.05755	0.00238567
	GRIN2A	3.60755	0.000799093		USP32P2	-2.35177	0.00238743
	GNPNAT1	1.54045	0.000801701		ALS2CL	-2.43943	0.00241566
	HS6ST1	1.79415	0.000802157		FBXL2	-2.30351	0.00243359
	TAGLN3	5.12295	0.000803061		RASSF10	-2.84825	0.00243439
	CRYGD	5.72589	0.000806193		PDE4DIP	-1.79149	0.0024561
	GPN3	1.82472	0.000810283		INPPL1	-1.79574	0.00246057
	AMT	1.60802	0.000810664		TMEM54	-2.0807	0.00249548
	EBPL	2.21495	0.000810837		JUP	-1.6088	0.00249861
	STK33	2.59457	0.000811595		TNRC18	-1.69805	0.00250292
	ID3	2.55761	0.00081189		ADPRHL1	-1.79924	0.00252381
	GOLGA2P10	2.38411	0.000812117		TECPR2	-1.50518	0.0025582
	ZMYM3	1.52563	0.000812647		CEP126	-2.65224	0.00256242
	IGFBPL1	2.41781	0.000812872		C6orf1	-1.95525	0.00257277
	VAV3	4.08768	0.000812879		FSTL3	-2.90046	0.00258463
	LIMD2	2.1027	0.000814469		CDH11	-2.40967	0.00258566
	MYO10	2.69758	0.000815995		HIST1H1C	-1.76692	0.00260081
	PTX3	3.87617	0.000816031		CAMK2A	-3.05334	0.00261803
	ANKLE1	2.73633	0.000816246		GALC	-1.58533	0.00262448
	SYT4	5.77679	0.000821255		CPZ	-2.12065	0.002627
	HCN1	4.24317	0.00082234		NUDT18	-2.9062	0.00263668
	SLC38A4	4.65719	0.000827431		MAOA	-1.90612	0.00263673
	SNRPA	2.63931	0.000828249		GGACT	-2.53672	0.00264087
	PNMA2	3.40978	0.000828949		ATP1B1	-1.89086	0.00265383
	TMEM52	3.7837	0.000829881		COL4A6	-1.79811	0.00266395
	TTLL4	1.69227	0.000834201		SLC35E1	-1.88249	0.00266427
	GPR143	2.18258	0.000834687		NEK11	-2.17305	0.0026787
	GBX2	5.75516	0.0008354		TGFB1	-1.6251	0.00268694
	HMX2	5.65641	0.000839761		RNASET2	-1.51209	0.00270484
	RBM11	5.63534	0.000840672		MAP1A	-1.74588	0.00271322
	ETV3L	5.8091	0.000841121		TTC3	-2.43736	0.00275544
	SHANK1	3.98848	0.000842215		NKX3-1	-2.68493	0.0027574
	ZGRF1	2.27864	0.000843244		LSP1	-3.40486	0.00276663
	ARF3	1.65204	0.000844069		SERPINE2	-2.67284	0.0027738
	NOS2	5.38423	0.000846925		TULP4	-1.56742	0.00277616
	CHRNB2	3.85029	0.000847378		TIGD6	-1.96332	0.00277734
	ESF1	2.15463	0.000848749		WDR31	-2.29115	0.00279092
	NPIPA3	3.9658	0.00084916		VASN	-2.01249	0.0027928
	NCAPG2	2.4202	0.00085144		ZNF454	-4.46473	0.0027962
	ANK1	3.47432	0.000853349		CAPG	-1.88595	0.00281411
	GFRA3	5.71561	0.000855632		DSG2	-1.60405	0.0028275
	DHCR7	1.70748	0.000859217		PTPN18	-1.80911	0.00282958
	RP11-1035H13.3	1.59833	0.0008597		SRGAP2C	-1.73337	0.0028365
	NPIPA2	4.16773	0.000860776		MFSD6	-2.02297	0.00284181
	FLOT2	1.96185	0.000863712		PLCXD2	-2.53269	0.00284582
	LARGE1	1.93724	0.000865932		GOLGA3	-1.64226	0.00285872
	AIMP2	1.55843	0.000866826		DYRK4	-1.7117	0.00286336
	SYT12	2.68077	0.000868832		ARFGAP3	-1.64987	0.00286618
	DNAAF5	1.54735	0.000874786		NGEF	-1.89764	0.00286718
	LSM12P1	7.13233	0.000876872		MYLK4	-2.7149	0.00287276
	IGHG1	6.90663	0.000876951		JUNB	-1.90916	0.00289042
	MSH2	1.9647	0.000877537		AC093616.4	-2.47432	0.00289451
	NYAP1	2.71157	0.00088256		KRT5	-3.50933	0.00291861
	MCM5	3.6575	0.000884508		ENDOV	-1.63523	0.0029242
	HMBS	1.61037	0.000893064		ARHGEF17	-1.65209	0.00294001
	RNF44	1.85978	0.000894088		RIMBP3B	-5.2067	0.00295185
	KCND2	5.1356	0.000894742		FES	-1.71586	0.00295554
	SLC19A2	1.77577	0.000895171		ADCK2	-1.64379	0.00300595
	SNRPE	2.28411	0.000895368		MMP9	-2.12856	0.00300883
	DUSP13	4.54892	0.000899517		CSPG4	-2.30118	0.00300966
	SNX10	3.34641	0.000902536		PIGV	-1.63189	0.00304245
	PFDN4	2.49971	0.000904382		LRRC37A7P	-3.61917	0.0030629
	CHP2	2.72721	0.000906026		PIGH	-1.82989	0.00306297
	PARD6G	2.25503	0.000908037		ANO9	-1.71969	0.0030828
	USP28	2.06836	0.000912282		ENPEP	-2.92003	0.00309679
	USH1G	3.63644	0.000914641		RNF225	-3.83103	0.00310417
	PRIM2	1.54806	0.000916747		ACTL10	-3.47876	0.00310765
	RPS6KL1	3.17389	0.000918662		SDPR	-3.368	0.00312916
	ANO5	5.27021	0.00091874		KIF13A	-1.61842	0.00313334
	CLDN10	1.88883	0.000918913		FITM2	-1.70939	0.00313671
	CD1D	4.90573	0.00092056		MICALL1	-1.84177	0.00316656
	TXNRD1	1.55587	0.000921458		ANKLE2	-1.53797	0.00318642
	PLEKHJ1	1.55649	0.000921774		ANO1	-2.54313	0.00320212
	ZCCHC12	5.04847	0.000926072		EMP1	-3.31517	0.00321489
	HTR2C	5.72519	0.000926834		MCTP2	-2.1263	0.0032175
	ARHGAP22	3.30386	0.000928082		GLTPD2	-3.26048	0.00323049
	MYO3A	3.95567	0.000930776		TCP10L2	-3.99405	0.00323184
	MIS18BP1	1.95082	0.000936794		LOXL1	-1.62997	0.0032335
	SEZ6L	6.02694	0.00094324		RECK	-1.56692	0.00324595
	CAD	1.74206	0.000944366		VPS13C	-2.54544	0.00327069
	SMIM3	1.94763	0.000947689		TICAM2	-4.59786	0.00328101
	CAPN11	4.8374	0.000950167		HIST2H2BF	-2.55904	0.00329683
	QTRT2	1.92215	0.000950405		TANGO2	-1.52409	0.00330553
	RAD51AP1	2.89998	0.00095597		TMEM144	-2.25812	0.00334508
	KLK13	4.98034	0.00095955		RP11-927P21.5	-3.96865	0.00336482
	LSM6	2.03415	0.000959647		MT-ND6	-1.90634	0.00336529
	GLO1	1.80625	0.000959903		DAP	-1.58632	0.00336638
	CHD1L	1.53823	0.00096097		ANKMY2	-1.83983	0.00337858
	COLEC12	2.93908	0.000961156		ZNF879	-2.95426	0.00339348
	FAM162A	2.53494	0.000965765		ZNF185	-1.84409	0.00340502
	CARMIL3	3.36383	0.000968647		SPACA9	-2.71912	0.00341207
	HOOK1	2.49579	0.000969647		TUSC1	-1.63413	0.00341701
	DACT3	2.428	0.000969791		YIPF2	-1.56238	0.00341816
	CAMK1	3.31126	0.000969942		MANSC1	-1.76062	0.00342002
	MAK16	1.75878	0.000975921		DAB2	-1.76209	0.00343078
	STEAP2	2.65972	0.000975938		CTAGE5	-1.74146	0.0034415
	SPATA31C1	4.50773	0.000976871		TCHH	-3.36943	0.00345226
	RECQL4	1.56941	0.000977045		ATG4A	-2.0911	0.00346223
	SIX1	4.99898	0.000977847		FAM174A	-1.64014	0.0034686
	RP11-701H24.9	3.22004	0.000977931		NGF	-2.97468	0.00347282
	CCBE1	3.47144	0.000980026		NCF4	-3.70754	0.00348232
	RRP1B	1.93055	0.00098088		EXO5	-1.79598	0.00349966
	GRIP2	4.86602	0.000982344		APBA1	-1.77159	0.00351616
	KLHDC3	1.76288	0.000985799		NMRK1	-1.59065	0.00355209
	EIF1B	1.68098	0.000990399		APOBEC3G	-2.20361	0.00355382
	GCK	4.0919	0.000993866		SPACA6	-1.79252	0.00359766
	H2AFZ	2.44004	0.000996973		ANXA3	-1.70243	0.00360894
	KNTC1	1.81758	0.000999181		PPP1R1C	-2.9069	0.00361587
	ARHGAP42	2.3683	0.00100243		TMEM139	-2.8033	0.00362479
	ALX1	5.59057	0.00100423		ZKSCAN1	-2.06326	0.00363335
	ADCY5	3.45719	0.00100921		CTTN	-1.85979	0.00364995
	ZNF101	1.7452	0.00101154		HSPB7	-2.97139	0.0036685
	ATG4D	1.63349	0.00101663		PPP1R3E	-2.01211	0.00367454
	MYT1	5.60035	0.00101827		ZNF69	-2.21484	0.00368134
	CCDC141	4.88667	0.00102593		TGFB1I1	-2.1892	0.00370764
	CCT7	1.66999	0.00102697		F8A3	-1.69256	0.00373844
	DUS3L	1.85985	0.00102744		ABHD14A	-1.75701	0.00374051
	PALM3	2.21885	0.00103234		ADHFE1	-2.23086	0.00374493
	HAP1	3.07112	0.00103401		WNT10A	-2.39623	0.00377411
	C10orf105	5.79318	0.00103435		PABPC1P4	-3.87969	0.00378082
	MSC	5.78306	0.00103446		CRIPAK	-1.93871	0.00378427
	IGKC	6.67042	0.00103523		VAMP5	-3.18132	0.00380227
	ATPAF1	1.60468	0.00103569		KIDINS220	-1.71931	0.00380994
	SLC25A15	1.78803	0.00103626		IL18R1	-3.17758	0.00381571
	RP11-673C5.1	1.87578	0.00104193		GOPC	-2.0558	0.00382115
	RASGEF1A	2.56377	0.00104312		SLC23A2	-2.06204	0.00382379
	KLHL26	2.29451	0.00104335		WHAMM	-1.6774	0.00383314
	NUTM1	4.87457	0.00104455		PEBP4	-3.78509	0.00384012
	CD3EAP	3.12097	0.00104577		SGCG	-3.33263	0.00384529
	PCDHAC1	5.99053	0.00104756		ESPNL	-2.07389	0.00385085
	PARD3B	2.98737	0.00104772		NOTCH2NL	-2.07582	0.00385957
	PRSS12	3.74609	0.00104773		KCNIP4	-3.23733	0.0038611
	ZIK1	1.64426	0.00105046		LAMA5	-1.5818	0.00386484
	ATIC	1.63655	0.00105266		SIRT2	-1.65509	0.00387025
	AOX1	3.01102	0.0010556		MYO3B	-2.41812	0.00387871
	CR1L	4.84803	0.00105628		RIMBP3C	-3.17493	0.00387928
	TM7SF2	1.74917	0.00105676		SQRDL	-2.7896	0.00390302
	FANCD2	2.55903	0.00105995		OAS2	-4.21214	0.00391426
	FAM162B	5.48259	0.00106258		ZDHHC1	-1.7764	0.00393241
	HOMER2	1.68621	0.00106347		SRGAP2B	-1.53307	0.00393528
	TTK	3.42772	0.00106351		KRT17P1	-4.02009	0.00394424
	SLCO4C1	3.90487	0.00106668		FER	-1.76787	0.00394491
	KCNQ3	4.89919	0.00106908		TBXA2R	-2.19291	0.00396692
	RMI2	2.28392	0.00107204		GYG1	-1.55826	0.00396771
	NRIP3	2.14452	0.00107275		CCPG1	-1.93041	0.00396966
	RASD1	4.35594	0.00107375		CDK19	-1.84706	0.00398027
	STMN1	1.64199	0.00107551		BEND6	-2.14125	0.00401953
	SBK3	5.53649	0.00107718		MAGEH1	-1.75793	0.00402012
	GSG2	2.85063	0.00107955		ITGB5	-1.88671	0.00404037
	BNC1	4.93932	0.00107968		ANKRD52	-1.74878	0.00407026
	MPZ	2.81911	0.00107984		ZNF44	-2.39366	0.00407371
	RIC3	3.19271	0.00108039		IGFBP7	-3.23406	0.00407559
	ACTL6B	4.57628	0.00108105		SLC2A4RG	-1.88523	0.00407995
	FBL	2.68333	0.00108157		HAAO	-2.33269	0.00408293
	PUM3	1.63453	0.00109543		NCOA7	-2.86032	0.0040924
	KCNQ4	3.21611	0.0010958		SPOPL	-1.56035	0.00411204
	DSCC1	3.94901	0.00109682		TRIM66	-1.78998	0.00411905
	CHAC2	3.95576	0.00109944		BTBD7	-1.57039	0.0041318
	GUCA1A	2.24412	0.00109981		C2orf81	-1.85796	0.0041353
	MIXL1	3.90273	0.00110023		HOXB2	-2.87115	0.00415165
	GLUD2	5.61653	0.00111063		RP11-568K15.1	-2.51511	0.00420344
	TMEM132E	5.47993	0.00111238		SLFN5	-1.90059	0.00421251
	ANKRD18A	3.93954	0.00111439		IGSF22	-2.54501	0.00423796
	ECI1	2.18496	0.0011194		FXYD5	-1.53824	0.0042453
	PRKX	2.07479	0.00112172		FAM98C	-2.00308	0.00425553
	PGAM1	1.85758	0.00112594		ARHGEF3	-1.57724	0.00428048
	ABCE1	1.62566	0.00112754		SUSD6	-1.60561	0.00429627
	FGF16	5.50503	0.0011333		EFCAB1	-1.9506	0.00430862
	RAB6B	2.16631	0.00113541		MUC15	-4.8985	0.00433576
	WDHD1	2.58469	0.00113571		PCLO	-2.37152	0.00433939
	BAALC	3.28449	0.00113663		TNFSF13	-1.73802	0.00434472
	EXOSC3	1.57595	0.00114066		MGLL	-3.2333	0.00435395
	GCSH	2.15115	0.00114262		NFIB	-2.00622	0.00437841
	HSPA4	1.51035	0.00114282		CHSY3	-3.35963	0.00438398
	KIAA0226L	5.74058	0.00114708		GOLGA8B	-1.94673	0.00438531
	ZNF138	2.30644	0.00115253		SLC1A6	-2.32663	0.00439002
	NID1	2.76758	0.00115447		HIP1R	-1.64856	0.004417
	XYLT1	3.60502	0.00115552		MANBA	-2.18854	0.0044223
	CKMT1B	3.36886	0.00115562		FAM101A	-1.55083	0.0044224
	CGN	1.69413	0.00115581		BEST1	-2.50403	0.00442732
	WDR18	1.78674	0.00115602		C14orf79	-1.60301	0.00444847
	ECEL1P2	3.76875	0.00115745		DAPK1	-1.66379	0.00446831
	FAM101B	3.10132	0.00115924		GOLGA8A	-2.20452	0.0044796
	PIEZO2	3.97559	0.00116237		ATP7A	-2.03546	0.00448392
	TMEM179	3.61848	0.00116322		FAM228B	-1.61972	0.00450212
	UTP4	1.53371	0.00117114		SULT1A3	-1.91828	0.00451083
	GK	2.5989	0.00117248		SPEF2	-2.60076	0.00451806
	CLMP	2.76212	0.0011763		DMRTC1B	-3.4387	0.004521
	RNF152	3.65509	0.0011845		PLOD2	-1.6372	0.00455291
	PPP1CC	1.90685	0.00118521		GRHL1	-1.96932	0.0045824
	ASIC2	5.44106	0.00118604		ARL14	-4.31849	0.00460808
	NOL11	1.63571	0.00118777		SLC1A4	-1.90689	0.0046134
	MGARP	4.11884	0.00118884		STS	-1.76288	0.00461444
	GRIA4	4.61602	0.00118989		ZNF79	-1.67859	0.00461497
	PPIL1	1.64345	0.00119257		RNF223	-2.96313	0.00461746
	DRD4	3.1621	0.00119582		GJD3	-3.42806	0.00462909
	C11orf87	4.64025	0.00119786		ACE2	-3.98726	0.00465584
	SNRNP40	1.55468	0.00119829		PIGP	-1.65601	0.00466904
	DHX37	2.00196	0.00119872		HIST2H4B	-2.49442	0.00467869
	CASP10	2.64807	0.00120071		PHLDA3	-1.51621	0.00471368
	KIF12	5.44633	0.00120185		RGS10	-2.16147	0.00471499
	SLC25A4	1.63287	0.00120331		MGAM	-3.36686	0.00471925
	SLC35B4	1.92025	0.00120501		ZNF799	-2.41513	0.0047652
	PAM16	1.73025	0.00120535		INPP1	-1.79454	0.00478712
	PCDHA11	4.38883	0.00120614		KIAA1109	-1.97193	0.00478767
	AUTS2	2.18155	0.00121104		CXCR5	-5.1336	0.00478826
	ASGR1	4.53527	0.00121202		ZNF726	-2.87783	0.00479733
	CDH4	3.52458	0.00121621		FNDC3A	-1.70612	0.00481111
	CPNE9	4.10748	0.00121643		ZNF575	-4.02117	0.00483743
	C10orf82	3.25811	0.00121756		TAS1R3	-3.27353	0.00484019
	NME1	1.9908	0.00121826		KCNE5	-2.08795	0.00484159
	ANGPT1	5.07636	0.00122138		ELMOD3	-1.50876	0.00484925
	TCERG1	1.50423	0.00122228		ZNF547	-2.08248	0.00488645
	ENPP4	4.04538	0.00122241		BOK	-1.55712	0.00489013
	PAIP2B	2.15195	0.0012232		ZNF780A	-1.5269	0.00490484
	RGS6	5.41681	0.00122443		MBTPS2	-1.53591	0.00492905
	MRPS34	1.67739	0.00122708		FAM63B	-1.52289	0.00493803
	NUCKS1	2.13698	0.00122875		MMP2	-2.95061	0.00495183
	FOXO1	2.34609	0.00122948		UNC93A	-2.64202	0.00495779
	EFNA2	5.264	0.00123192		C19orf70	-1.72629	0.00498658
	PADI3	3.49726	0.00123592		SARAF	-1.55464	0.00499341
	KISS1R	5.42288	0.00123717		GRK4	-2.0177	0.00500538
	PTAFR	3.45435	0.00123852		KRT13	-5.63439	0.00502679
	VOPP1	1.67988	0.0012424		CCL28	-2.76345	0.0050379
	SYNPO	3.78336	0.00124359		RRAS	-1.79443	0.00508539
	LHX2	4.448	0.00124852		FILIP1L	-2.99073	0.00510291
	OCA2	5.38364	0.00124961		C21orf2	-1.57611	0.00512923
	SLCO5A1	4.01453	0.00125302		SLC22A3	-2.54088	0.00514839
	TNFSF9	3.88559	0.00125699		ADTRP	-2.7582	0.00516939
	SLC18A2	4.44774	0.00125806		IRAK2	-2.04568	0.00518703
	PCDH10	4.45797	0.00125869		TMEM187	-2.03702	0.00519827
	CYC1	1.68267	0.00126308		ARHGEF33	-2.56083	0.00523992
	COL21A1	6.01004	0.00126323		TCAF2P1	-3.8186	0.00529159
	WNK4	3.86118	0.00126359		GIPR	-2.43525	0.0052972
	ARHGAP33	1.51098	0.00126557		BTG2	-1.60713	0.00529912
	DTL	4.50853	0.00126841		CLDN4	-2.19208	0.00530568
	TBC1D4	2.74844	0.00127005		CTD-3092A11.1	-3.92079	0.00530753
	ZNF273	2.20257	0.00127069		AMY2B	-2.78864	0.00531157
	HNRNPD	1.83644	0.0012708		BANK1	-2.67259	0.00532589
	RANGAP1	1.67717	0.00127127		FMN1	-1.64526	0.00536583
	CEBPZ	1.99363	0.00127354		METTL21B	-1.85216	0.00537018
	AUNIP	2.97315	0.00127653		AGBL2	-2.07455	0.0053784
	MIS18A	2.03121	0.00127783		LYPD6B	-1.91948	0.00539826
	OR7E14P	4.76633	0.00127943		GPT	-3.31336	0.00541996
	PRR19	2.33882	0.00128314		PDZD7	-1.96258	0.00542341
	UBE2E1	1.50248	0.00128435		PDGFD	-2.08154	0.00544132
	SH2D3C	3.12882	0.00129022		AL513122.1	-5.38286	0.00544452
	MTF2	1.80612	0.0012915		GOLGA8R	-2.85313	0.00547372
	ARNT2	1.91196	0.00129351		MATN1	-2.77706	0.00547728
	MTUS1	6.42649	0.00129621		ZNF846	-1.72192	0.00549882
	ERC2	2.96663	0.00129817		CD4	-1.77375	0.00552327
	NTSR1	4.62554	0.00130318		DENND3	-1.57695	0.00553368
	S1PR5	4.40666	0.00130451		CALML6	-3.36581	0.00553694
	RPA2	1.57174	0.00130722		CFAP45	-3.16299	0.0055406
	ZNF511	1.7506	0.00130758		PTPRE	-2.20485	0.00554445
	EXOSC2	1.5115	0.00131083		UBE2Q2P1	-3.88796	0.00554586
	KNSTRN	2.06203	0.00131927		OSCP1	-2.31808	0.00554873
	ANOS2P	4.0348	0.00132395		TDRD7	-1.65972	0.00558578
	DCAF15	1.56689	0.00132416		CDK6	-1.59516	0.00560689
	BMP2	2.90363	0.00132644		KLHL31	-3.99707	0.00563223
	GJB7	4.66462	0.00133338		MYZAP	-3.57715	0.00563415
	KCNN3	3.73388	0.0013338		TTLL11	-2.62839	0.00564332
	DPEP1	5.62215	0.00133441		LIMA1	-1.83424	0.00564644
	CACNA1A	2.08166	0.00133625		DFNB59	-2.54854	0.00565488
	CEP72	1.96668	0.00134205		C5orf42	-2.41348	0.00565711
	PLPPR4	5.3755	0.00134718		KIAA1715	-1.92172	0.00567874
	LSM5	2.01294	0.00135332		TLR1	-3.33531	0.00571197
	SLIRP	2.24734	0.00135984		SLC46A3	-2.90535	0.00576983
	DDX10	1.74941	0.0013643		ZNF224	-1.65805	0.00582411
	HMGB1	1.82037	0.00136796		ZNF396	-2.46363	0.00583402
	MPHOSPH6	1.69662	0.00137417		CPM	-2.31782	0.00583809
	TFRC	2.12575	0.00137631		ZNF324B	-1.86149	0.0058504
	MUTYH	1.71361	0.00137912		CLEC16A	-1.5063	0.00585145
	COA7	1.8237	0.00137965		RP5-1028K7.3	-2.14066	0.00586239
	CCT3	1.67441	0.00137996		C4BPB	-2.45782	0.00587254
	DRD2	4.72143	0.00138062		GOLGA8J	-3.27404	0.00589138
	ZBTB46	2.09748	0.00138457		BIRC7	-3.63075	0.00591323
	DNAJC2	1.56079	0.00138594		PALLD	-1.59183	0.00592847
	ZNF121	2.09672	0.0013881		ANKRD53	-2.58545	0.00593586
	C10orf2	1.89706	0.00139252		YAF2	-2.11923	0.00595429
	CCT4	1.6312	0.0013976		LCA5L	-3.08463	0.00596914
	GKAP1	3.52816	0.00140407		MSRB3	-1.61959	0.00600626
	ENAH	2.20431	0.00140506		PLEC	-1.82259	0.00601111
	EOMES	5.64427	0.00140604		CYSRT1	-1.99777	0.00601727
	SATB1	2.08181	0.0014145		F12	-1.65886	0.00604508
	TESPA1	3.20933	0.00142079		P3H1	-1.64367	0.00606946
	DOCK4	2.58919	0.00142748		DRC3	-1.89491	0.00608243
	MACC1	3.56665	0.00143033		FBXO8	-1.52448	0.00609877
	EPHA7	6.1218	0.00143836		CDK3	-1.6984	0.00611169
	NAF1	1.78498	0.00143871		MROH7	-2.75199	0.00614111
	TMEM56	4.37804	0.0014488		CXorf40A	-1.51469	0.00621786
	ZDHHC15	3.60459	0.0014507		SLC28A1	-3.56752	0.00621795
	NT5DC3	2.11107	0.0014543		RASSF9	-3.5176	0.00625089
	DNAAF2	1.64751	0.00146102		ELAC1	-1.57408	0.00625418
	MTSS1	2.98877	0.00146439		RPL23AP87	-2.08318	0.00627547
	CMTM8	3.22313	0.00146586		CLDN11	-2.64238	0.00628814
	RASGRF2	4.38937	0.00146627		ZNF524	-1.76687	0.00630373
	WNK3	2.37546	0.00146646		BAHCC1	-1.83358	0.0063224
	CEP76	1.80086	0.00146668		SGCA	-3.02187	0.00634796
	SNRPB	2.17697	0.00147049		GJB4	-2.81802	0.00635353
	CMTM7	1.58447	0.00147276		ZNF763	-2.6356	0.00640967
	UBE2N	1.61479	0.00147355		CHN2	-1.85202	0.00646371
	ACOT7	2.8126	0.00147708		LRRN4	-1.97459	0.00649365
	FAAH2	2.54313	0.00148079		SERPINB5	-2.94932	0.00650199
	TIGD4	3.79061	0.0014899		NDRG2	-1.61952	0.00650478
	SDK1	2.21921	0.00149346		ZNF347	-1.54641	0.00653803
	RENBP	3.13302	0.00149364		CLIP4	-3.11465	0.00655598
	DPP6	3.11591	0.00149474		ULBP2	-2.91232	0.00658289
	NRCAM	4.93553	0.00149526		LMO7	-1.58887	0.00668389
	RP1-27O5.3	3.22184	0.00150409		ANK3	-1.55355	0.00670507
	RP3-403A15.5	4.28013	0.00150517		FNDC1	-3.81308	0.00673456
	PLEKHO1	2.21188	0.0015246		PLB1	-3.07546	0.00675572
	CPSF4	1.59414	0.00152505		FAT2	-2.16994	0.0067596
	NAA15	1.58386	0.00152719		WHAMMP2	-2.10127	0.00677377
	ANKRD1	5.7973	0.00153323		PDLIM2	-1.73861	0.00677437
	SHMT1	2.0007	0.00153903		AKAP6	-2.16579	0.00678109
	CD79B	5.48003	0.00154186		TXNIP	-2.79042	0.00678727
	POC1A	2.03876	0.00154193		NBR2	-2.39738	0.00680954
	G3BP1	1.5897	0.0015436		COL5A2	-2.24078	0.00680983
	SNAI3	3.05909	0.00154396		ZNF343	-1.91478	0.00694761
	POLA1	2.06284	0.00155199		PHEX	-2.53057	0.00697909
	KLHL3	2.17483	0.00155475		GATSL3	-1.52833	0.00699888
	KIF2C	3.30149	0.0015576		AGAP9	-1.64814	0.00704045
	DYDC2	4.2606	0.0015588		RP11-89K11.1	-2.63328	0.00707926
	MRPL50	1.51084	0.00156243		NOXA1	-2.39571	0.00711217
	RNF150	3.87112	0.0015684		HIST1H3E	-2.15687	0.00711286
	FREM2	3.31374	0.00157102		C1orf101	-2.92986	0.00711559
	DUSP26	5.55738	0.00157605		CCDC146	-3.55015	0.00711919
	SLC17A7	3.21952	0.00158267		SLC2A1	-1.70019	0.00717466
	DOC2B	4.73499	0.0015831		KCNH5	-3.60861	0.00719283
	FASN	1.67047	0.00158343		STK10	-1.59272	0.00721169
	ADM2	2.71379	0.00158697		RCN3	-1.72043	0.00730485
	PSEN2	1.94988	0.00161324		FAP	-3.46406	0.00732232
	LMNB1	3.7222	0.00161538		C11orf52	-2.60735	0.00740076
	NPY1R	5.69073	0.00162416		CTAGE4	-2.02179	0.00742144
	HSP90AB1	1.85635	0.00162428		GLS	-1.63901	0.00745675
	TSLP	5.22008	0.00162464		KANK1	-1.654	0.00745961
	ALDH1B1	1.83926	0.00163211		IL15	-1.86965	0.00747048
	VAV1	3.51617	0.00163631		GFOD1	-1.8814	0.00748516
	CACNA1E	4.04338	0.00165386		ZNF599	-1.60569	0.00751251
	GAD2	4.65395	0.00166061		PARP12	-2.09256	0.00751503
	RBM12	1.95687	0.00166548		TRAM2	-1.57632	0.00756452
	HMGB2	3.77254	0.00167395		SLAMF9	-3.65947	0.00759967
	AC006486.9	6.25348	0.00167479		PLXNA3	-1.8956	0.0076025
	NIFK	1.57793	0.00167928		S100A13	-1.61349	0.00761704
	TDRD5	5.24983	0.00167963		NFKBIZ	-1.62053	0.00768943
	EIF4E3	2.33722	0.00168376		LRRC37A	-2.65914	0.007751
	KIAA1958	2.00418	0.00168779		AKR1C2	-2.16008	0.00776625
	DHODH	1.61477	0.00169287		LY6E	-2.17185	0.00777043
	KLF7	1.83089	0.00169928		IFIT3	-3.60388	0.00778003
	PCDHA10	2.72183	0.00169968		CLTB	-1.61956	0.00792165
	GSE1	1.63852	0.00170552		LA16c-380H5.3	-2.91373	0.00792858
	CTD-2311M21.2	2.9572	0.00170753		CFAP206	-3.97811	0.00793467
	CARHSP1	2.17111	0.00170852		FAT4	-1.77248	0.00795161
	FBP1	4.46473	0.0017141		CHIC2	-1.51124	0.008029
	GINS4	2.15992	0.00171804		ME3	-1.51336	0.00803438
	XKR6	2.15472	0.00173976		MAP3K5	-1.93747	0.00831314
	HCN2	2.39361	0.00174281		TRAM1L1	-2.43891	0.00831825
	PRB3	5.19856	0.00174543		RAB7B	-2.48126	0.00836448
	YBX1	2.2784	0.00174682		TRIM7	-2.42452	0.00845185
	GRK6	1.78965	0.001748		PLGLB1	-2.60442	0.00845744
	FZD3	1.97989	0.00174821		EFNB1	-1.73627	0.00847254
	POPDC3	5.73268	0.00174934		NFATC2	-1.93931	0.00851209
	IMPA1	1.55294	0.00175744		PRKCE	-1.84407	0.00853076
	FMNL3	2.2691	0.00175849		FAM231D	-1.7689	0.00861951
[truncated: 980 more rows]

## Sheet: vs H9 hESC-iMEF
	gene_symbol	logFC	P.Value		gene_symbol	logFC	P.Value
	RPS4Y1	14.6234	1.45836e-11		RP11-572P18.1	-12.1648	1.28867e-10
	IGF2	7.35935	1.02612e-10		RPL23AP42	-10.9989	1.47573e-09
	AGR2	11.9102	1.43693e-10		RGPD2	-7.92772	1.63809e-08
	TGFBI	5.78289	2.19289e-10		PKIB	-3.81472	1.72728e-08
	DASS-161H22.6	11.3875	3.09095e-10		RP11-512M8.5	-7.49864	2.84397e-08
	TSPYL5	10.7699	3.86446e-10		RP11-159J3.1	-5.35216	3.23514e-08
	ATP6V1G2-DDX39B	9.72896	2.44852e-09		GLIPR1L1	-5.15859	5.17776e-08
	ITGB6	9.41929	3.36058e-09		STMN2	-3.55347	5.68899e-08
	CDH1	4.21485	3.90986e-09		RP11-1070B7.3	-6.42824	1.20219e-07
	ZFY	9.73691	4.37831e-09		EEF1GP1	-5.51169	1.23212e-07
	EIF1AY	6.88238	4.47891e-09		MBNL3	-3.79793	1.54561e-07
	CKS1BP3	10.6209	4.50427e-09		RP11-1070B7.2	-6.37427	1.61969e-07
	RPL3P4	4.91259	5.77029e-09		AC002398.9	-6.4255	1.78146e-07
	TUSC1	9.40205	6.27976e-09		RP11-1070B7.1	-6.07113	2.47422e-07
	KDM5D	8.08485	6.35912e-09		H3F3AP4	-8.40703	2.50478e-07
	ESRP1	5.05646	8.9932e-09		RPL13P12	-5.87532	4.72987e-07
	GRHL2	6.86859	1.10628e-08		SMIM3	-3.10332	6.35392e-07
	AP1M2	4.67364	1.38562e-08		PIR	-2.4318	9.45148e-07
	COL3A1	7.56232	1.67039e-08		ZFP42	-4.62115	1.02897e-06
	COL17A1	5.56848	1.99896e-08		PFKFB3	-2.0146	1.06829e-06
	PKP3	5.89887	2.00857e-08		SFRP1	-1.86509	1.12891e-06
	CLDN7	7.26984	2.02568e-08		ZNF441	-3.88848	1.33454e-06
	MMP9	4.44757	2.13995e-08		C1QL4	-4.19486	1.42618e-06
	TXLNGY	7.68813	2.22045e-08		EIF3CL	-5.01419	1.46145e-06
	UTY	6.96707	2.44551e-08		RP11-114H7.1	-4.94125	1.47559e-06
	KRT14	10.9382	2.60405e-08		MTRNR2L11	-2.91969	1.4963e-06
	IGFBP3	4.69614	3.08779e-08		SIK1	-5.67188	1.64298e-06
	CCDC80	3.0657	3.50568e-08		C5orf63	-2.94807	1.76593e-06
	GNRHR2P1	7.28762	3.57441e-08		TSPAN3	-2.07834	1.7704e-06
	SRY	8.3414	4.05901e-08		SHISA3	-4.69473	1.84012e-06
	MFAP5	6.01833	4.75373e-08		CHKB-CPT1B	-3.7123	1.85662e-06
	S100A14	6.96357	4.80772e-08		LINC00672	-2.93054	1.92205e-06
	AC006116.27	7.04728	4.86463e-08		HLA-DRB5	-3.90844	2.00223e-06
	RP11-651P23.4	4.93628	5.1593e-08		LRRC37A11P	-4.01195	2.06494e-06
	DDX3Y	11.895	5.82437e-08		RP11-259G18.2	-4.72191	2.19162e-06
	PDLIM1	2.65935	6.19141e-08		MMP3	-4.77132	2.22834e-06
	KRT17	8.94574	6.68957e-08		STK31	-3.80036	2.46902e-06
	PWP2	6.19242	7.67354e-08		RP11-486M3.3	-4.63371	2.47156e-06
	ZBED2	6.7191	8.08211e-08		CLDN16	-6.57465	2.53541e-06
	LAMB3	7.64201	8.61199e-08		EPHA3	-4.05736	2.73741e-06
	HKR1	3.48676	9.49837e-08		FOSB	-3.26537	2.81215e-06
	CD74	4.13943	9.598e-08		CTD-2104P17.1	-4.59602	2.85677e-06
	ZNF85	4.77857	1.16726e-07		CBSL	-10.6864	3.02809e-06
	ACP5	5.40375	1.53116e-07		SEMA6D	-2.79312	3.28201e-06
	CDH3	4.2327	1.5887e-07		AC004556.1	-4.10107	3.39018e-06
	CRYGD	7.02053	1.59552e-07		NKX6-1	-3.0911	3.48829e-06
	LAD1	6.42971	1.63615e-07		SLITRK5	-2.58	3.63326e-06
	LAMC2	4.71462	1.64527e-07		TAL1	-3.99539	3.76719e-06
	CTC-273B12.7	7.88289	1.65115e-07		PCDH10	-2.15488	4.00275e-06
	IRF6	3.82828	2.14625e-07		SOAT1	-2.59284	4.29013e-06
	TGM2	4.45487	2.21212e-07		HMGB1P5	-3.48303	4.32916e-06
	DPEP3	8.93558	2.41424e-07		FGF23	-4.88479	4.45927e-06
	KRT5	10.64	2.60206e-07		RP11-293I14.2	-4.3684	4.48505e-06
	MMP23B	4.39124	3.02319e-07		CACHD1	-1.80009	4.55297e-06
	ZNF502	8.08127	3.05923e-07		NMNAT1P3	-5.21038	4.74862e-06
	AC027682.1	8.22628	3.06864e-07		SLC7A11	-2.05729	4.76695e-06
	XAGE2	6.00094	3.12339e-07		GTF2IP1	-1.8889	4.84029e-06
	LAMA3	6.87047	3.13695e-07		OPRK1	-2.79198	5.26919e-06
	GPAA1P1	5.55393	3.28983e-07		LIMCH1	-3.2996	5.41418e-06
	USP9Y	7.58223	3.31496e-07		HNRNPA1P4	-4.37219	5.73722e-06
	MATK	4.1087	3.34109e-07		RP11-216N14.5	-4.00815	6.03194e-06
	HMGN2P5	10.1209	3.45381e-07		CTC-429P9.4	-6.36656	6.04546e-06
	AC243587.1	10.1209	3.45381e-07		IL1RAPL1	-3.89973	6.07069e-06
	TIMP3	4.88861	3.64665e-07		AGAP14P	-4.21753	6.15483e-06
	ECEL1P1	4.14645	3.65047e-07		FGFBP3	-2.3407	6.33913e-06
	MMP24	4.68924	3.66163e-07		RP11-848G14.2	-4.25416	6.43955e-06
	AC006486.9	8.49212	3.68066e-07		MAGEB17	-5.90316	6.99662e-06
	TMEM125	4.42661	3.68631e-07		CPO	-4.84727	7.46167e-06
	ZNF626	4.10104	3.69623e-07		RPS28P7	-3.45452	7.68564e-06
	SCNN1A	4.13283	3.70073e-07		ACTN3	-2.3681	8.71264e-06
	PKP1	5.50605	3.74094e-07		CD2	-4.25676	9.0715e-06
	TMSB4Y	7.22881	3.86849e-07		APLN	-1.9281	9.25216e-06
	LY6D	7.11745	3.915e-07		MRPL50P1	-4.5872	9.51068e-06
	ZNF542P	4.72746	3.94295e-07		PRDX1P1	-3.94155	1.00454e-05
	KCNN4	5.71335	4.04113e-07		RP3-406A7.1	-4.24933	1.12874e-05
	ANXA1	4.01991	4.17434e-07		LUC7L3	-1.82757	1.13931e-05
	CEBPZOS	4.61065	4.25969e-07		CEP170P1	-3.84525	1.13984e-05
	ITGBL1	7.78295	4.3995e-07		TBL1X	-1.60457	1.15028e-05
	EPAS1	5.34557	4.50737e-07		KIAA0101	-1.72272	1.17541e-05
	LUM	5.90752	4.61341e-07		FAM213A	-1.89827	1.1837e-05
	EDN1	4.67114	4.62001e-07		SH3KBP1	-1.75461	1.18789e-05
	MTND4LP30	7.26264	4.70679e-07		GLT6D1	-4.18145	1.23686e-05
	ZNF677	4.9518	4.89185e-07		MID1	-1.98501	1.26775e-05
	PTCHD3P1	5.8335	4.90183e-07		RP11-109P14.8	-3.88301	1.40765e-05
	ZXDA	7.49214	5.12729e-07		CPNE1	-2.00842	1.41055e-05
	CDSN	9.26892	5.31649e-07		FRRS1L	-2.63979	1.44545e-05
	SPTLC1P1	7.18855	5.32775e-07		RP11-447L10.1	-4.04089	1.55293e-05
	CDKN1A	4.02595	5.4284e-07		DDX11L1	-3.75302	1.63265e-05
	ZNF253	6.06788	5.51645e-07		AC109631.1	-3.9638	1.64364e-05
	TLE2	3.73054	5.64352e-07		S1PR5	-2.65056	1.65971e-05
	TRIM4	4.70991	5.64432e-07		MGARP	-2.26926	1.6786e-05
	FN1	4.88581	5.6823e-07		RP1-274L7.4	-3.77919	1.72773e-05
	CPXM2	2.92818	5.71564e-07		PUDP	-1.5385	1.75089e-05
	ZNF826P	5.20597	6.25613e-07		AADAT	-1.90975	1.80114e-05
	ARHGEF19	2.6165	6.36427e-07		FZD10	-3.10318	1.84254e-05
	P2RX2	7.58916	6.50261e-07		PLCL2	-1.55079	1.87958e-05
	FRG1CP	7.28427	6.50566e-07		RPL22L1	-2.21984	1.91428e-05
	RP11-124L9.6	5.74188	6.60681e-07		ANKRD6	-2.19129	1.98174e-05
	DUSP23	9.63917	6.7156e-07		ZNF491	-3.21397	1.98742e-05
	C8orf4	5.70484	6.8125e-07		ANKRD12	-2.9881	1.99026e-05
	INPP5D	2.78729	6.84265e-07		CLDN11	-2.10338	2.00612e-05
	ST14	3.34538	7.03391e-07		RGPD1	-5.00317	2.02298e-05
	AC066615.1	6.56039	7.19285e-07		NRN1	-3.52006	2.19938e-05
	MARVELD3	3.08437	7.73238e-07		FOXA2	-3.56178	2.27874e-05
	PNPLA4	4.81741	7.909e-07		AC114812.9	-3.62058	2.3095e-05
	ZNF680	8.34185	8.05302e-07		SLC47A1P1	-3.67464	2.39409e-05
	KANK4	4.78702	8.21385e-07		EEF1A1P27	-3.87333	2.42654e-05
	EIF3FP3	4.17517	8.2694e-07		H2BFM	-3.41756	2.45803e-05
	DSG3	5.07409	8.4644e-07		OR7D2	-3.00584	2.48295e-05
	KRT6A	11.0395	8.52479e-07		GNAZ	-1.63995	2.61816e-05
	SPARC	1.77923	8.85042e-07		RP11-497H16.8	-3.73976	2.66049e-05
	IL32	4.91528	8.87056e-07		MED15P9	-3.52728	2.72416e-05
	SOX15	4.61937	8.98123e-07		POU3F2	-3.4987	2.72643e-05
	PARP12	3.44125	9.19421e-07		NEGR1	-2.24048	2.77447e-05
	DPYS	5.56175	9.21617e-07		ZEB2	-3.09161	2.77808e-05
	CST6	5.33708	9.33476e-07		ANKRD36C	-2.59497	2.86122e-05
	RP11-807H22.6	5.42017	9.38648e-07		GOLGA6L10	-4.96097	2.86893e-05
	CLIC3	7.23495	9.4921e-07		ULBP1	-2.3976	2.90917e-05
	TSPAN1	5.16714	9.5953e-07		GRIN2A	-2.65328	2.98891e-05
	C21orf33	3.69546	9.76647e-07		SLC25A14	-1.84022	3.02542e-05
	C19orf33	5.83854	1.04194e-06		RP11-692N5.2	-5.59807	3.08364e-05
	TRIM29	7.1324	1.08237e-06		ZNF665	-2.27135	3.09916e-05
	NLGN4Y	7.54417	1.10635e-06		RP11-437B10.1	-1.54777	3.20012e-05
	LGALS3	3.50352	1.11283e-06		DLEC1	-2.43654	3.27763e-05
	ANKRD24	2.75788	1.15758e-06		RP11-235E17.2	-4.44847	3.314e-05
	PSMB8	3.79692	1.18383e-06		OPN1SW	-3.19741	3.31799e-05
	QPCT	8.989	1.18517e-06		CSPG4P10	-2.12738	3.34282e-05
	LTBR	4.33902	1.20053e-06		THPO	-2.6647	3.39467e-05
	RP11-343C2.9	6.03097	1.22623e-06		FLRT2	-2.20003	3.40852e-05
	TNF	6.43633	1.23657e-06		UNCX	-3.41456	3.45345e-05
	RIMS4	2.12075	1.30995e-06		RP4-765C7.2	-3.37061	3.49194e-05
	AGR3	6.66934	1.60257e-06		NCAM1	-2.34548	3.521e-05
	ICAM1	3.95001	1.61156e-06		RAPGEF4	-2.55832	3.52188e-05
	CSF1R	5.1344	1.61629e-06		RP11-542C16.2	-4.32798	3.54766e-05
	FAP	6.29571	1.70178e-06		ANKRD46	-1.50611	3.5676e-05
	C1orf210	5.42404	1.72153e-06		AP000769.1	-3.10151	3.5887e-05
	ZNF93	5.7764	1.73473e-06		HIST1H2AJ	-3.51461	3.59514e-05
	ZNF350	4.46905	1.76496e-06		VAT1L	-2.03947	3.60297e-05
	SERPINB7	6.20109	1.77897e-06		RP11-864N7.2	-4.85575	3.79495e-05
	RGL3	2.77784	1.7795e-06		INSL4	-3.34816	3.81017e-05
	MAMDC2	2.63322	2.02843e-06		PATL2	-3.01748	3.81444e-05
	TBL1Y	6.89121	2.0698e-06		NLRP2	-2.42027	3.95089e-05
	ZNF682	4.40809	2.15732e-06		SCN2B	-2.93175	3.95741e-05
	HRH3	4.26812	2.17397e-06		RP11-543E8.2	-3.3979	3.99252e-05
	PROCR	2.29137	2.27242e-06		RP11-411B6.6	-4.3964	4.00499e-05
	SPRR3	7.10512	2.31689e-06		PLOD2	-2.0073	4.02931e-05
	EVPL	5.19433	2.37207e-06		OLIG1	-3.91055	4.0944e-05
	GAS6	2.49381	2.40892e-06		TLX3	-3.51154	4.13846e-05
	TUBB4A	2.06589	2.43683e-06		TBC1D3P5	-3.5282	4.20433e-05
	ZNF90	4.72132	2.45928e-06		GPR135	-2.46131	4.25303e-05
	C15orf48	5.50984	2.51072e-06		KRT222	-3.34009	4.25585e-05
	SPINT1	2.42459	2.55123e-06		AMOT	-1.71987	4.29107e-05
	OAS3	2.96904	2.61405e-06		LRRC37A	-3.90241	4.29931e-05
	FBXO2	2.71724	2.6371e-06		ZIC4	-2.71094	4.35787e-05
	UGT1A6	5.96866	2.63817e-06		RP11-722G7.1	-2.35174	4.38607e-05
	TAP1	2.50652	2.71239e-06		TMEM255A	-3.05321	4.43188e-05
	GNA14	7.41881	2.71738e-06		TUBBP5	-2.63867	4.45657e-05
	COL1A1	4.34744	2.73904e-06		PSMD10	-1.97627	4.75185e-05
	MSLN	5.27165	2.82848e-06		CLGN	-2.89621	4.77425e-05
	ANOS2P	7.89507	2.88013e-06		DPY19L2P1	-2.25684	4.84523e-05
	GJB3	7.04073	2.89146e-06		AMH	-6.40471	4.85873e-05
	HPGD	3.58458	2.8947e-06		SLC25A5P5	-3.43089	4.90197e-05
	ANXA8L1	3.85593	2.92629e-06		RNF145	-1.55187	4.91648e-05
	PROM2	3.70192	2.97214e-06		RP11-835E18.4	-2.71135	4.99821e-05
	PTGES	2.47544	2.99458e-06		PHOX2B	-3.52591	5.02059e-05
	MTRNR2L4	4.61822	3.01954e-06		KLF2P1	-3.65061	5.04487e-05
	COL9A3	2.09872	3.16333e-06		PRR27	-3.27183	5.08738e-05
	NECTIN4	5.00349	3.17944e-06		DBX1	-2.44071	5.15486e-05
	FRG1BP	7.61511	3.19407e-06		bP-2189O9.2	-3.48052	5.16029e-05
	SYT11	2.35742	3.21801e-06		DHX40P1	-4.11589	5.17725e-05
	S100A9	6.01596	3.31296e-06		TMPRSS11E	-2.17335	5.3432e-05
	IFIH1	7.01525	3.35991e-06		ASCL1	-4.4658	5.41241e-05
	MTRNR2L8	2.52899	3.38553e-06		RP11-347C18.1	-3.25684	5.54054e-05
	PIWIL2	4.28543	3.40238e-06		CTD-3105H18.14	-3.29072	5.58855e-05
	S100A8	4.32626	3.44807e-06		RPL23AP2	-3.69561	5.61549e-05
	MLPH	4.25504	3.49305e-06		ACRV1	-3.26917	5.68531e-05
	EPHX3	2.52381	3.53994e-06		USH2A	-3.62738	5.80548e-05
	GPNMB	3.11577	3.60243e-06		LRRN3	-4.9926	5.86601e-05
	KDF1	2.93661	3.612e-06		SCN3A	-4.61795	5.92763e-05
	MAGEA2	6.18223	3.62131e-06		C5orf24	-1.5513	6.04661e-05
	AGRN	2.09485	3.66767e-06		SMIM11A	-3.64741	6.08093e-05
	ZNF595	4.42354	3.70271e-06		RP11-574M7.1	-3.1527	6.18292e-05
	SLFN12	3.68773	3.74714e-06		MX2	-2.02559	6.19539e-05
	ZNF772	3.08436	3.78169e-06		TMEM170B	-1.77368	6.25578e-05
	BST1	3.53154	3.81978e-06		FOS	-2.32032	6.26591e-05
	IRF2BP2	1.65619	3.92001e-06		CNNM1	-2.29029	6.35771e-05
	PCDHGA11	3.4692	3.92239e-06		MCMDC2	-2.55598	6.47117e-05
	TINAGL1	2.51463	3.93717e-06		RP13-228J13.5	-3.1038	6.62046e-05
	OVOL1	5.7767	3.98425e-06		FUT11	-1.80473	6.63521e-05
	HLA-K	5.31886	4.00065e-06		NAP1L1P1	-2.99535	6.88192e-05
	MTND2P28	4.68681	4.20907e-06		FST	-2.21475	6.90489e-05
	NRN1L	4.36098	4.27723e-06		ZDBF2	-2.95664	6.97266e-05
	GBP2	5.7852	4.3104e-06		AC002310.11	-4.43167	7.0962e-05
	BICDL2	3.37543	4.32783e-06		RP11-977G19.10	-1.96474	7.10603e-05
	TNNT3	5.18834	4.36001e-06		GSTA1	-2.63982	7.53936e-05
	BSPRY	2.88544	4.41799e-06		NPAS3	-2.59558	7.59859e-05
	PAK6	3.0083	4.4406e-06		TEX22	-2.86538	7.60106e-05
	CRISPLD2	4.27934	4.4882e-06		C14orf132	-1.59288	7.65315e-05
	NMRK2	2.97855	4.65057e-06		VGLL3	-1.61327	7.86456e-05
	SORD2P	2.43266	4.92979e-06		PARP1P1	-3.64868	8.00608e-05
	ITGB4	2.65214	4.93637e-06		YBX1P1	-2.47204	8.01386e-05
	GLS2	2.79698	4.9925e-06		SLC9A9	-2.52016	8.1252e-05
	SNAI2	3.1001	4.99251e-06		PHOX2A	-4.25404	8.4096e-05
	RPL9P18	4.69231	5.0211e-06		BOD1L1	-2.07379	8.45488e-05
	ANXA8	7.04005	5.02936e-06		MDGA2	-2.92349	8.60301e-05
	SCNN1G	5.22397	5.0846e-06		ENOSF1	-1.6037	8.60915e-05
	AC104532.2	5.97668	5.10306e-06		FAM199X	-1.54568	8.61379e-05
	DYSF	2.89747	5.17911e-06		RAP2A	-1.99471	8.71093e-05
	CR1L	3.95379	5.19054e-06		RP11-364B14.3	-2.80526	8.79783e-05
	AK4P1	7.10041	5.26872e-06		ANKRD30BL	-3.74799	8.89606e-05
	CTSF	2.37585	5.2736e-06		MICA	-2.06685	9.00753e-05
	RP11-101E5.7	4.0006	5.29284e-06		MECOM	-2.01869	9.21159e-05
	HCG4B	4.0006	5.29284e-06		TMEM38B	-1.6156	9.58234e-05
	VTCN1	5.07743	5.31806e-06		NRCAM	-2.73347	9.62849e-05
	CSF2RB	4.06216	5.31826e-06		BRICD5	-1.94763	9.64065e-05
	LYPD3	3.60721	5.38616e-06		ZNF664	-1.70689	9.64236e-05
	GRAMD3	2.33558	5.44288e-06		TRPC4	-1.71544	9.72443e-05
	TECRP1	8.30982	5.46771e-06		PNMA2	-2.25164	9.80984e-05
	ZNF559	3.86642	5.46904e-06		CORT	-3.66883	0.000102448
	MTRNR2L6	1.772	5.54407e-06		ARPIN	-1.51773	0.000103288
	TP73	3.04744	5.64255e-06		TTC3P1	-2.38618	0.000105038
	HPN	3.20002	5.6749e-06		APITD1	-1.85447	0.000105902
	INMT-FAM188B	4.40767	5.78e-06		PRRG3	-2.19977	0.00010602
	LTBP2	3.19176	5.80472e-06		FAAH	-1.69508	0.000109848
	ANXA3	2.45405	5.87127e-06		TSC22D3	-2.10895	0.000111697
	ODAM	5.32688	5.90529e-06		LRP2	-2.03944	0.000111861
	MYOF	2.19806	5.91507e-06		FIGNL1	-1.67972	0.000113224
	IER3	2.74277	5.9489e-06		NAALAD2	-2.64173	0.000114666
	S100A6	3.10007	5.95312e-06		ACVR2A	-1.676	0.000114746
	AC005307.3	5.05475	5.9906e-06		ADGRL2	-1.67682	0.000115728
	ERBB3	2.409	6.0217e-06		GLYATL2	-2.60946	0.000115853
	MUC16	8.65733	6.09763e-06		NR4A2	-2.01081	0.000117145
	ZNF501	4.42865	6.16292e-06		MTTP	-2.43379	0.000118953
	PPL	1.79967	6.35367e-06		COMMD3-BMI1	-3.07149	0.000122701
	GATA3	4.54865	6.37755e-06		RPL7P20	-3.94058	0.000123681
	BMP7	1.90299	6.43595e-06		STS	-1.70641	0.000125143
	GIPC3	3.52027	6.49914e-06		RP11-475C16.1	-4.63475	0.000128171
	PTHLH	6.0987	6.51918e-06		FBXL13	-1.94032	0.000129377
	PRPH2	3.59011	6.698e-06		ENPP2	-1.93298	0.000134752
	ALDH3B2	5.6781	6.82491e-06		DDTL	-2.08046	0.000135116
	HK2P1	4.52982	6.85683e-06		FSD2	-2.40974	0.000135647
	IGFBP7	3.02766	7.0862e-06		PPIAP22	-4.76251	0.000136
	BAMBI	1.77569	7.19795e-06		ATP6AP1L	-2.4852	0.000136185
	TUBA4A	3.26313	7.22261e-06		PABPC4L	-2.36929	0.000136716
	ELMO3	2.91443	7.25159e-06		FBXO43	-3.26412	0.000138841
	LUZP2	3.83621	7.31858e-06		TAS2R15P	-2.85022	0.000139349
	C19orf66	2.97008	7.41401e-06		PRSS53	-1.85823	0.0001398
	RP11-256K7.1	3.8809	7.44696e-06		TFF3	-3.25589	0.000140627
	TACSTD2	7.8069	7.64565e-06		OLIG2	-2.36317	0.000141982
	DCN	4.41539	7.68339e-06		FAR2P1	-2.78376	0.000143028
	MEDAG	2.61028	7.69658e-06		C6orf118	-2.62545	0.000143071
	CLIP2	1.9268	7.70999e-06		KEL	-2.10861	0.000147167
	RP11-686D22.7	3.62735	7.82835e-06		YAF2	-2.96163	0.000147387
	C1orf116	3.81679	7.82979e-06		HIST1H2BI	-3.31021	0.000147898
	ASTL	4.22852	8.06049e-06		CLUL1	-2.09597	0.000148323
	ERP27	6.11145	8.0651e-06		DCC	-1.95927	0.000148594
	HEY2	3.35864	8.24319e-06		ST8SIA1	-2.00002	0.000149328
	IFITM3	1.85299	8.36085e-06		EPM2AIP1	-1.85805	0.000151703
	GJB5	4.22482	8.63825e-06		AHSA2	-1.57743	0.00015256
	ARHGDIB	6.15207	8.68642e-06		HIST1H2BF	-3.34959	0.000154102
	FA2H	3.18474	8.77973e-06		POLA1	-2.10835	0.000154237
	PIEZO1	2.78053	8.89006e-06		ANKRD20A4	-2.97091	0.000158585
	MXRA8	2.63218	8.90525e-06		PAK3	-2.78357	0.000159736
	SIX3	2.58612	9.07411e-06		LCN9	-3.14317	0.000159958
	NOMO3	1.69396	9.15097e-06		KCNJ3	-3.23402	0.000161067
	COL1A2	3.00717	9.17274e-06		WDR78	-2.41884	0.000161807
	GRIN2D	2.42764	9.24237e-06		ATP6V1C2	-1.85214	0.00016222
	HSPA2	2.77587	9.3427e-06		RPS15AP25	-3.09568	0.00016386
	ATCAY	1.69316	9.5141e-06		NR3C1	-1.98429	0.000165535
	CDKN2B	4.22394	9.64638e-06		PITX2	-2.34646	0.000167868
	COL16A1	3.08868	9.72812e-06		KLHL15	-1.57825	0.000167896
	VWA1	3.2569	9.75585e-06		ZPBP2	-3.13421	0.000169873
	SGK1	2.79789	9.91884e-06		RP11-637O19.3	-3.36523	0.000171266
	LCK	3.62054	1.02506e-05		CCT4P2	-3.04048	0.000171952
	DMRTB1	3.91466	1.02579e-05		DNM1P47	-2.53883	0.000173147
	HLA-DPB2	3.91731	1.02891e-05		TAS2R20	-3.26722	0.000173744
	ANO9	3.36931	1.04665e-05		RP11-631M6.2	-3.54185	0.000174352
	TBX18	4.57496	1.05382e-05		NBPF9	-1.5431	0.000175784
	ABC13-47656900H15.1	3.75265	1.05733e-05		EID2B	-2.09897	0.000175931
	SCEL	5.15619	1.06431e-05		SLC5A12	-2.70641	0.000176068
	HPDL	2.21593	1.06637e-05		THAP10	-2.10843	0.000178247
	UPK1B	5.7187	1.07473e-05		CTD-3105H18.18	-3.14927	0.000178498
	SNRPEP4	3.21717	1.10454e-05		EPHA4	-2.52754	0.000179984
	CDH13	2.42947	1.10545e-05		SLC16A3	-2.64493	0.000186687
	ERRFI1	1.79294	1.1193e-05		SLC1A2	-2.53818	0.000187142
	IL22RA1	5.39241	1.12976e-05		MINOS1	-1.5245	0.000188985
	OSR1	4.8009	1.13165e-05		PRR29	-2.69523	0.000190465
	ACAP1	1.94945	1.16262e-05		MEIS1	-2.74801	0.00019051
	DNAJA4	3.38947	1.16612e-05		EDNRB	-1.97153	0.000190599
	FTLP14	5.54739	1.2117e-05		RP11-1305N21.3	-3.52487	0.000194128
	ALPPL2	3.70485	1.2407e-05		RP11-723O4.6	-2.30222	0.000194637
	EPS8L2	2.41839	1.25163e-05		LRCH2	-2.42812	0.00020036
	PLSCR5	6.21674	1.26714e-05		NFIA	-2.96773	0.000200786
	CCDC152	3.96115	1.2751e-05		RALGAPA1P1	-3.18965	0.000201912
	SPSB2	2.28315	1.29929e-05		CXXC4	-2.66778	0.000202978
	MFSD6L	5.52758	1.30378e-05		ZNF280B	-2.02608	0.000205197
	EPN3	4.69079	1.31821e-05		ZNF192P1	-2.45642	0.000206375
	CBLC	3.01126	1.32575e-05		RP11-380G5.3	-2.76147	0.00020818
	ZNF486	4.15826	1.32649e-05		ACSL4	-1.82347	0.000209129
	LRRTM1	2.35579	1.35146e-05		RP11-15G8.1	-2.35423	0.000214473
	CALCB	3.95719	1.35214e-05		RLN2	-2.6265	0.000214882
	WNT6	7.32529	1.36723e-05		MAP1B	-1.68262	0.000216923
	CRYL1	3.52996	1.3799e-05		RP11-371A22.1	-2.53068	0.000218244
	SEC24D	1.65604	1.3825e-05		PLA2G2D	-2.88661	0.000220066
	PCDHB15	2.88832	1.38767e-05		WNT8A	-5.17964	0.000228552
	EPS8L1	1.87658	1.40463e-05		RP11-592N21.1	-3.57514	0.000228922
	MISP	3.62596	1.41019e-05		OLIG3	-2.44813	0.00023302
	CSAG3	5.60348	1.41195e-05		AP1S2	-1.6327	0.000235108
	IL36RN	4.98165	1.43293e-05		ASB5	-2.47837	0.000237388
	RP5-1061H20.3	3.81571	1.43574e-05		PRELID1P1	-2.19799	0.000238536
	UTS2	5.30031	1.43653e-05		RAB40A	-2.19243	0.000238973
	C5orf46	3.91562	1.46935e-05		GDPD3	-2.29775	0.000239423
	SLC39A4	2.32774	1.48711e-05		SCRN3	-1.5151	0.000242261
	SSC5D	2.58229	1.4877e-05		NBPF15	-1.59071	0.000242511
	TNNT2	2.28952	1.49506e-05		FAM174B	-1.71162	0.000244303
	FAM132A	3.91417	1.49896e-05		ADAM17	-1.58006	0.000244726
	CPNE7	3.87321	1.5025e-05		ANKRD36	-2.136	0.000245648
	SLAMF8	6.73006	1.50842e-05		KIAA1456	-2.52219	0.000245914
	CBR1	1.69482	1.54525e-05		AMDHD1	-1.85892	0.00024602
	ATP1A3	1.89616	1.54628e-05		COLQ	-1.79219	0.000246221
	CLCA2	4.44776	1.5497e-05		B4GALNT2	-1.74718	0.000248874
	MAP7	2.36208	1.55129e-05		TUBA3FP	-2.09392	0.000251464
	FAM155B	1.65189	1.58692e-05		SP8	-2.25428	0.000253861
	RPL9P28	4.09072	1.59516e-05		SLC5A9	-3.03321	0.000254331
	MYL2	4.09072	1.59516e-05		HSD17B7	-1.60678	0.000254421
	RP3-323B6.1	4.22693	1.59845e-05		BCHE	-3.44173	0.000257008
	EEF1A2	2.44681	1.59935e-05		HYPK	-2.0436	0.000258515
	MPP1	2.96772	1.60203e-05		HNRNPA1P7	-3.2639	0.000258557
	NCF2	3.99601	1.61094e-05		AC113404.1	-2.66806	0.000259232
	NME2P1	3.92746	1.61726e-05		SP140L	-1.80475	0.000260821
	SNAI3	2.96891	1.62173e-05		ADAMTS9	-1.64318	0.000261384
	CRB3	3.1331	1.64097e-05		TBC1D26	-2.19035	0.000264046
	RP11-641D5.1	1.58638	1.64135e-05		PMS2P5	-2.57165	0.000264499
	FAM20A	2.59399	1.64225e-05		CFAP44	-2.58936	0.000265041
	GPR176	4.97615	1.64391e-05		RP11-758I14.3	-2.56947	0.000269661
	ZNF80	4.00675	1.65158e-05		RP11-490K7.4	-3.27635	0.000270637
	NBEAL1	1.81763	1.66911e-05		ZNF608	-2.13244	0.000272171
	LARGE2	2.46798	1.67614e-05		PRMT8	-1.7336	0.000272516
	CTD-3214H19.4	3.79694	1.69442e-05		PKD1P5	-3.27006	0.000275086
	PCDHB5	3.31935	1.7026e-05		RP11-389O22.4	-3.44545	0.000275857
	ACOT7	1.85837	1.74637e-05		BEX5	-1.53934	0.000276628
	TJP3	2.5618	1.84931e-05		CLHC1	-1.78962	0.00027978
	VAV1	2.94915	1.85185e-05		MEIG1	-2.6406	0.00028079
	SFN	5.34648	1.869e-05		POTEF	-2.6511	0.000280988
	ZNF135	4.17363	1.87497e-05		LPA	-2.68213	0.000283112
	TNNC2	2.81958	1.87722e-05		DNM1P46	-3.39822	0.000286733
	RPL7AP58	3.47316	1.88416e-05		PLGLB1	-3.05654	0.000286871
	RPS20P2	3.47316	1.88416e-05		SPATA8	-3.27381	0.00028767
	RPL9P25	3.47316	1.88416e-05		MRPS18AP1	-3.0289	0.000288756
	TSSC2	1.83597	1.89465e-05		HNRNPA1P10	-2.35356	0.000291821
	DUOXA1	3.82854	1.95073e-05		CERS3	-2.08159	0.000294081
	KCNMA1	2.13521	1.95456e-05		NTRK2	-3.97625	0.000296016
	GRB7	2.87511	1.96431e-05		SOX17	-3.03706	0.000296469
	ADAMTSL4	2.27382	1.9819e-05		ANKRD36B	-2.30349	0.000297519
	CTD-2542C24.2	3.75209	2.03346e-05		ARSE	-1.57705	0.000300069
	DLGAP3	3.011	2.05132e-05		SOX1	-2.02541	0.00030316
	CLDN4	4.99774	2.06104e-05		ZEB1	-2.81125	0.000303167
	KRT16	6.35931	2.07165e-05		HLA-DRB1	-1.78336	0.00030603
	CAPN6	1.79389	2.07787e-05		POLRMTP1	-2.84449	0.00030669
	PDE4B	2.57898	2.09245e-05		FOXF2	-2.9247	0.000308845
	CDCP1	3.13014	2.09878e-05		RP11-281P11.1	-2.62753	0.000314443
	RPL12P17	4.61951	2.12784e-05		RP11-49K24.6	-1.82132	0.000314824
	ZNF662	3.02804	2.12788e-05		APCDD1	-2.16114	0.000317496
	RRAD	4.32297	2.13755e-05		DPY19L2	-1.68797	0.000324498
	SERPINB9	3.06281	2.14416e-05		MYRIP	-2.10895	0.000324629
	NOC2LP1	4.73174	2.15654e-05		FZD3	-1.78126	0.000324747
	MMP1	8.92013	2.16043e-05		PLP1	-1.61818	0.000330763
	RASA3	2.4467	2.16222e-05		AACSP1	-4.39208	0.000331332
	IL1R1	3.60865	2.17032e-05		NOVA1	-1.68198	0.000332372
	OLFM2	1.85244	2.17721e-05		SCAND2P	-1.86142	0.000332578
	SPSB1	2.22724	2.24731e-05		GALNT16	-1.6574	0.000333263
	SIX2	3.37113	2.29005e-05		AC010642.2	-2.50074	0.000334613
	HSPA8P8	3.96099	2.29569e-05		DHFRL1	-2.01472	0.000336112
	FXYD1	2.34263	2.30085e-05		RP11-124L9.2	-2.00067	0.000337505
	KLHL34	5.38888	2.3144e-05		GPR62	-3.07562	0.000338899
	C17orf97	2.31319	2.36501e-05		HIST1H4B	-2.76862	0.000339047
	RWDD4P1	3.38637	2.47899e-05		NEK11	-1.53966	0.000342369
	HNRNPA3P5	3.38637	2.47899e-05		MGAT4A	-2.57726	0.000344185
	GGTLC2	3.92803	2.54271e-05		NKAIN3	-2.17647	0.000345987
	FOXH1	1.70101	2.54881e-05		ZFHX4	-1.9996	0.000346586
	SKI	1.76855	2.56059e-05		RP4-777O23.3	-3.02791	0.000349473
	FOXD3	2.18192	2.57144e-05		AC079776.2	-2.50878	0.000350762
	WNT10A	4.04837	2.60037e-05		RPL17-C18orf32	-2.03683	0.000351716
	GALNT3	3.2002	2.62089e-05		SLC1A1	-1.78146	0.000352262
	NPNT	2.93407	2.62674e-05		CD99L2	-1.64372	0.00035261
	PHLDA3	2.73328	2.64383e-05		EIF3KP3	-2.60786	0.000354673
	HSPG2	2.06374	2.68132e-05		HEPACAM	-3.24291	0.000355328
	LAYN	3.39274	2.6908e-05		C21orf140	-3.3417	0.000357667
	NRROS	2.94591	2.70808e-05		ZNF780A	-1.67021	0.000362087
	GGT4P	3.63551	2.70898e-05		PABPC5	-2.41695	0.000368325
	RP11-113A11.1	3.63551	2.70898e-05		NAMPTP1	-1.88705	0.000376568
	RP11-529H20.3	3.63551	2.70898e-05		FAM228B	-1.54083	0.000378147
	RP11-420K14.1	4.05499	2.71019e-05		HIST1H2BG	-2.83914	0.000378339
	LCP1	4.4124	2.74237e-05		ARHGAP6	-2.53161	0.00038017
	OVOL2	3.6784	2.74873e-05		MT1F	-1.86675	0.000385446
	BLNK	4.55954	2.7515e-05		INSIG2	-2.63868	0.000388922
	CTB-60B18.15	3.63397	2.85916e-05		REEP1	-1.96111	0.000391157
	PCDHB18P	3.63397	2.85916e-05		PLXNC1	-1.78471	0.000392839
	FTLP2	3.63397	2.85916e-05		FBXO48	-1.62832	0.000394074
	CYCSP6	3.63397	2.85916e-05		WDR17	-2.88575	0.000397984
	KRT7	3.48806	2.86715e-05		TMEM74B	-2.07211	0.000399014
	RAB40AL	3.22613	2.87212e-05		GFRA2	-1.54137	0.000399971
	RPS2P28	3.22613	2.87212e-05		ZNF774	-1.53881	0.000406133
	RP4-597J3.1	3.84966	2.90666e-05		SLC26A10	-1.9006	0.00040698
	RP11-535M15.2	3.84966	2.90666e-05		ZNF492	-3.11306	0.00040972
	SECTM1	5.64244	2.90684e-05		GRIN2B	-2.08084	0.000412318
	COL5A1	3.29125	2.92239e-05		MT3	-3.15067	0.000413815
	TJP2	2.8718	2.92786e-05		RDM1	-1.64496	0.000416217
	DENND1C	1.93703	2.94803e-05		TMEM235	-3.20035	0.000416878
	ZNF229	3.34746	2.95482e-05		PCDHGA9	-3.80815	0.000417286
	ACSM6	3.30884	2.9656e-05		TMEM150C	-2.55436	0.000419674
	FAM109B	2.47583	2.99075e-05		DUOX2	-2.28419	0.000421504
	OR7E91P	3.50601	3.06489e-05		LINC01125	-1.69262	0.000424208
	MAGEA4	4.30954	3.08728e-05		AQP6	-2.52628	0.000430927
	FLNB	2.32695	3.10416e-05		GPR85	-1.66413	0.000436117
	POU2F3	2.38176	3.11881e-05		DIRC3	-2.84148	0.000437278
	MAT1A	4.66372	3.12912e-05		MAP2	-3.45124	0.000438278
	LNX1	2.25617	3.12928e-05		NLGN1	-1.63672	0.000438739
	S100A11	1.83187	3.13433e-05		RDH16	-1.88654	0.000449161
	PRSS21	4.41483	3.13532e-05		CENPVP3	-2.50338	0.000458635
	FAM198B	2.60282	3.15802e-05		HTR2C	-2.23144	0.000467012
	TRBC2	4.62216	3.2508e-05		DCDC1	-2.23683	0.000468274
	PEG3	5.61897	3.26065e-05		AC083899.1	-2.65637	0.000469763
	MMP14	2.47338	3.29671e-05		CCDC168	-2.3714	0.000470878
	NOXO1	4.31838	3.30045e-05		CDH9	-4.14715	0.000471906
	S100A3	3.68496	3.30593e-05		RP11-110I1.5	-2.42049	0.00047547
	SH3GL2	3.16442	3.31553e-05		ATP6V0E2	-1.54043	0.000480049
	ZNF876P	2.76161	3.34943e-05		ATP6V1E2	-1.66781	0.000482032
	ITGA3	2.4906	3.36831e-05		TRAPPC3L	-1.91284	0.000484745
	ZNF883	3.70639	3.37012e-05		SLC25A41	-2.71142	0.000489157
	TOR4A	1.72096	3.37053e-05		RP11-646I6.3	-2.30859	0.000489202
	DSC3	3.02858	3.49848e-05		SYCP2	-2.50019	0.000491762
	PUSL1	2.25837	3.5492e-05		APLNR	-3.76089	0.000493511
	PRR15	2.28985	3.62197e-05		EGFEM1P	-2.05703	0.000495163
	CR2	3.53162	3.63007e-05		SPEF2	-2.11253	0.000497132
	BHLHA9	3.79508	3.63376e-05		ABCA8	-2.50713	0.000500943
	GH2	3.55621	3.65457e-05		PPIAL4G	-2.81685	0.000510444
	LRRC47	1.52639	3.70943e-05		RPS26P2	-2.42014	0.000516262
	PRR12	1.68681	3.74527e-05		MID2	-2.45455	0.00052062
	PLK2	2.65943	3.7961e-05		CLEC3A	-4.7417	0.000522632
	NAALADL1	2.51837	3.8083e-05		AGAP7P	-4.25967	0.0005231
	S100P	4.74451	3.84506e-05		NCLP1	-2.27937	0.000523777
	HES2	3.7039	3.85572e-05		LRRC69	-2.44909	0.000523929
	RARRES3	4.57487	3.86636e-05		RP11-111F5.2	-2.47358	0.000524002
	ATAD3A	1.80109	3.8908e-05		CFAP70	-1.95482	0.000528318
	ADGRF5	4.88826	3.91825e-05		GPCPD1	-1.58328	0.000531031
	TMEM30B	3.88249	3.9241e-05		B4GALNT1	-2.19534	0.000533781
	TPSD1	4.40168	3.93426e-05		MCRIP2P1	-1.73469	0.000535097
	CD8B	3.89163	3.95793e-05		NBR2	-2.18039	0.000537507
	GBP3	3.56271	4.01455e-05		RP11-386M24.4	-2.97702	0.000537524
	MINOS1-NBL1	3.01949	4.0461e-05		PDCD6IPP2	-1.65261	0.000537612
	ICA1	2.0037	4.05207e-05		RP11-20O24.4	-3.27564	0.000543156
	CHI3L2	3.90505	4.11927e-05		MROH7	-1.91469	0.00054612
	C1DP1	7.52602	4.15897e-05		TFRC	-1.76677	0.000547634
	MAP3K13	2.23692	4.17106e-05		CCDC160	-2.52359	0.000550373
	CH507-42P11.8	1.77303	4.2209e-05		PPT2-EGFL8	-5.60948	0.000554904
	UAP1L1	2.41093	4.26672e-05		SLC22A16	-1.97462	0.000560021
	RP11-26H16.1	3.75652	4.27296e-05		DDX11L2	-1.61525	0.000560408
	HSPB6	2.39195	4.32438e-05		HILPDA	-1.86337	0.000568073
	RIPK4	1.97615	4.38965e-05		CDH10	-2.36111	0.000568896
	A2ML1	2.34471	4.39676e-05		POTEC	-2.23781	0.000576329
	NEDD9	2.10954	4.43396e-05		PFN1P8	-2.66919	0.000579225
	SERPINB5	4.30492	4.43572e-05		NME1-NME2	-1.84019	0.000583446
	DCLK1	1.96375	4.47614e-05		LINC01207	-2.9923	0.000585905
	SOX13	1.61788	4.49348e-05		BMS1P16	-2.70247	0.000586087
	ELAVL4	3.95656	4.54085e-05		GDI2P2	-2.37071	0.000587116
	COX7A1	4.37038	4.54594e-05		BCAT1	-1.54665	0.000590779
	PCOLCE	2.0609	4.55058e-05		DNAH3	-1.61886	0.000592431
	EBI3	3.55358	4.56148e-05		LINC01296	-2.15745	0.000596459
	HCN2	2.15962	4.58286e-05		GUSBP9	-1.90223	0.000598747
	RPL27AP	3.4733	4.69171e-05		TMPRSS5	-2.09318	0.000599299
	MATN2	1.63616	4.69613e-05		AK9	-1.54498	0.000600918
	TPH2	1.90768	4.74888e-05		MPRIPP1	-2.14382	0.000601094
	CAPG	1.99535	4.7508e-05		NRIP1	-1.67421	0.000614738
	GFY	2.6904	4.76562e-05		GBP1P1	-2.01231	0.000615034
	PYGM	2.11692	4.81022e-05		RFX6	-2.75354	0.000620326
	SLC44A3	2.31327	4.82061e-05		MAP6	-2.42996	0.000620642
	AC021016.7	3.79764	4.84481e-05		ZNF518B	-2.26595	0.000621845
	RP1-4G17.5	4.61596	4.85673e-05		MAPK10	-2.34583	0.000631523
	RAB19	3.45755	4.87194e-05		LRRC7	-2.39133	0.000638385
	P2RX5	2.32847	4.87375e-05		RPSAP53	-2.33254	0.000642489
	CTA-313A17.3	4.93085	4.90746e-05		GPM6A	-2.60246	0.000647175
	ARHGAP10	1.69874	4.92677e-05		CD300E	-2.03656	0.000647452
	AMZ1	3.28531	4.9569e-05		ASIC2	-1.58066	0.000652637
	UNC13D	1.92538	4.96933e-05		MTCO3P21	-2.42747	0.000655561
	CHST8	2.25186	5.11586e-05		NPM1P40	-3.30176	0.000657227
	CAV2	2.92935	5.24474e-05		ULBP3	-1.61876	0.000659552
	P2RY6	2.79542	5.25252e-05		CDH7	-1.79057	0.00066203
	CKMT1B	1.6431	5.27989e-05		FGF7	-2.12836	0.000663557
	NT5E	3.11766	5.31702e-05		FOXA1	-2.23037	0.000664914
	ECEL1P2	2.5704	5.34031e-05		CFC1	-5.08599	0.000665099
	RP11-10O17.1	1.57445	5.41957e-05		CNTD1	-2.51393	0.000665236
	TDGF1	3.57621	5.4459e-05		HMGN2P6	-2.37827	0.000666548
	MELTF	1.60202	5.50989e-05		RBM41	-2.30196	0.000670186
	KLK5	3.21359	5.51502e-05		EFNB1	-2.42716	0.000677816
	MUC1	3.19958	5.55157e-05		PTGS1	-1.66106	0.000678828
	LRRC3B	2.36211	5.55264e-05		RP11-89K11.1	-2.3236	0.000679332
	CPZ	2.82149	5.56353e-05		NBPF3	-1.60387	0.000679637
	STAT5A	2.03229	5.5787e-05		HERC2P3	-2.50513	0.000681174
	LGALS1	2.80874	5.60766e-05		ILDR2	-1.94302	0.000681619
	ECM1	3.35961	5.95793e-05		MAB21L3	-2.02292	0.000685388
	LTF	5.24497	6.00929e-05		ASXL3	-3.01416	0.000688981
	PLEKHN1	5.18382	6.08494e-05		FOXP2	-2.76699	0.000692478
	BCRP2	2.0096	6.10024e-05		GLDN	-2.40896	0.000692635
	ENDOD1	1.80431	6.13888e-05		KCNB2	-2.15874	0.000692714
	SOWAHA	4.32216	6.17065e-05		RP4-803A2.1	-2.94474	0.000694162
	IGKC	7.82024	6.17662e-05		PCDH18	-2.04405	0.00069473
	BCL9L	2.24974	6.23348e-05		IL21R	-3.26623	0.000696113
	CSRP1	3.15959	6.23695e-05		RP11-166B2.1	-2.94869	0.000697443
	C3	2.49078	6.26235e-05		ZNF510	-2.43074	0.000705014
	IGHG1	8.09076	6.27637e-05		CCDC17	-2.25861	0.000708939
	HSPB7	4.6195	6.31535e-05		LRIG3	-1.74067	0.000715019
	CEBPD	2.30094	6.33937e-05		IREB2	-1.69727	0.0007191
	PIK3CD	2.5622	6.36805e-05		CACNB4	-2.26779	0.000733042
	GNA15	5.35273	6.38879e-05		AC018755.16	-2.00159	0.000733418
	RCN3	2.3831	6.40858e-05		C11orf63	-1.79259	0.000752258
	PRRG2	2.58102	6.47786e-05		PLAC8L1	-3.00441	0.000754283
	CHGA	2.36063	6.49592e-05		CARF	-2.1723	0.000754758
	TAPBP	1.83647	6.50824e-05		HAUS6P3	-3.64869	0.000757203
	NR1I2	5.38714	6.57052e-05		PYURF	-2.36565	0.000763406
	XKR7	2.13618	6.58566e-05		PKP4P1	-2.51343	0.000770314
	ZNF737	4.24414	6.69851e-05		ZNF69	-1.66547	0.000770513
	RP11-1035H13.3	2.68014	6.72757e-05		DNAH7	-1.91017	0.000770957
	ZAR1	4.68602	6.77527e-05		GOLGA8A	-2.36866	0.000774083
	EPHX1	1.97556	6.84796e-05		RP11-347C12.3	-3.20757	0.000775312
	BIK	3.60414	6.86374e-05		NUP62CL	-1.73445	0.000777006
	PRKY	3.8667	6.99146e-05		PLGLB2	-2.29472	0.000777725
	CBR3	4.39178	7.02429e-05		ORM1	-2.79044	0.000788794
	MAL2	2.39429	7.02901e-05		MTNR1A	-2.34238	0.000792562
	HLA-DRA	3.89346	7.05407e-05		THSD7A	-2.53095	0.000794789
	IL1RL2	4.00063	7.23646e-05		CLIC2	-1.84916	0.000795788
	KRT8P18	4.22126	7.34116e-05		OSBPL6	-1.74035	0.000797273
	HAND1	3.65657	7.34899e-05		TRPV3	-1.64649	0.000797516
	LAMB2	1.56059	7.41076e-05		TMEM187	-2.26764	0.00079833
	ARHGAP8	1.6713	7.52096e-05		AC018804.6	-2.35782	0.000801117
	RPL15P2	4.38357	7.54621e-05		CLEC2L	-2.1384	0.000809134
	ZNF829	2.513	7.54664e-05		PDK1	-2.51486	0.000810017
	CACNA1H	1.97185	7.59131e-05		CDC20P1	-2.32923	0.000819111
	TNFAIP3	1.81922	7.64384e-05		GNRH1	-2.10429	0.000821824
	FOXC2	3.20186	7.64403e-05		EIF4A1P10	-3.53417	0.000822377
	ZNF732	6.39733	7.74436e-05		ARMC4	-1.7935	0.000826741
	DHDH	2.31893	7.78596e-05		PNLIPRP1	-2.06879	0.00082698
	BNC1	3.33757	7.80641e-05		TTC3	-2.23562	0.000828236
	SPP1	2.01676	7.81367e-05		RP1-34B20.4	-2.34637	0.000832443
	FKBP11	1.59686	7.88742e-05		FAM90A12P	-2.70034	0.000835937
	TINCR	2.74394	7.90158e-05		CTBS	-1.50197	0.000837155
	COL5A3	2.43048	7.94272e-05		ARHGAP36	-1.96811	0.000857905
	PLP2	2.08236	7.94928e-05		SHH	-3.24767	0.000859495
	PSG5	4.33269	8.03342e-05		RP11-343H5.4	-2.72831	0.000859559
	B3GNT3	2.82275	8.06643e-05		ALG10B	-1.83106	0.000866605
	TCL1A	2.96825	8.06957e-05		PTN	-1.85015	0.00086809
	ENTPD2	2.58005	8.08234e-05		TLR5	-1.99346	0.000879647
	PRX	1.72486	8.10284e-05		RASGRP1	-1.95481	0.000880622
	RP11-400K9.1	3.75539	8.13757e-05		ZNF396	-1.7484	0.000893171
	ADCY5	2.83399	8.17455e-05		ZNF596	-1.59194	0.000899046
	ZNF880	2.25529	8.20303e-05		USP3	-2.01508	0.000901555
	WIF1	2.68251	8.20781e-05		TMEM100	-1.79301	0.000916183
	DRD3	2.64102	8.25243e-05		RPL12P25	-2.43697	0.000921934
	LGALS3BP	1.67394	8.32323e-05		BARX1	-2.07803	0.000925556
	PRKCH	2.46123	8.3287e-05		LECT2	-2.14164	0.000931356
	MT-ND3	2.11758	8.35472e-05		BRDT	-2.14164	0.000931356
	AMBP	2.67878	8.4065e-05		LCA5L	-2.46787	0.00093413
	ZFP36	2.66375	8.50558e-05		ITGA4	-1.77671	0.000947257
	RP11-475I24.9	4.59976	8.51028e-05		LL0XNC01-240C2.1	-2.23496	0.000952769
	RP11-61N20.3	2.48568	8.53218e-05		RP11-92C4.4	-2.27765	0.000955014
	OSBPL10	2.1068	8.62912e-05		SNX31	-2.71006	0.00095835
	TNS4	5.88471	8.69838e-05		SHC4	-1.60134	0.000963071
	ZC3HAV1L	3.54357	8.72761e-05		DEC1	-1.75769	0.000963081
	APOE	1.78273	9.04235e-05		P2RX5-TAX1BP3	-1.95985	0.000966389
	ITIH5	1.92225	9.05537e-05		HIST2H3D	-2.64477	0.000973013
	GALNT9	5.97378	9.25591e-05		BASP1P1	-2.70035	0.000979783
	PRSS22	4.48946	9.28827e-05		DNAJA1P3	-2.32179	0.000981352
	PGLYRP4	4.31547	9.3273e-05		RARB	-2.40922	0.000983223
	EXOSC3P1	4.51638	9.44644e-05		VPS13A	-2.11911	0.000983893
	ETV4	2.3032	9.47404e-05		RP11-325O24.5	-2.1752	0.000984015
	RBBP8NL	6.32235	9.55889e-05		PRSS50	-1.56829	0.000986321
	BNIPL	3.09713	9.58298e-05		ZNF514	-1.93718	0.000989626
	KLF5	2.42519	9.60152e-05		AC007040.11	-2.62679	0.000991854
	ACE	2.21411	9.63198e-05		PM20D2	-1.6527	0.000993094
	NDRG2	1.77	9.64191e-05		PLPPR1	-2.15219	0.000995174
	CREB3L1	1.54652	9.74229e-05		ZNF280C	-2.28481	0.000996368
	RP11-564D11.3	2.98208	9.97579e-05		DMXL2	-2.01916	0.00100445
	RPL21P17	2.98208	9.97579e-05		ZBTB16	-1.57706	0.00100884
	RPS7P15	2.98208	9.97579e-05		GCSAML	-3.57922	0.00101149
	TRIM10	2.98208	9.97579e-05		SLC25A53	-1.5947	0.0010152
	BTF3P4	2.98208	9.97579e-05		CTD-2245F17.3	-1.69249	0.00101645
	MYC	2.03759	0.000100248		CCDC162P	-1.72751	0.00101765
	KRT18P16	3.22945	0.000100557		AC111200.2	-2.36226	0.00102376
	IGHGP	3.22945	0.000100557		C17orf105	-2.15757	0.00102474
	RP11-259P6.3	3.22945	0.000100557		RP11-354K4.1	-2.38585	0.00102559
	RP11-84C10.1	3.22945	0.000100557		RPL5P30	-2.27272	0.00102702
	GGT2	3.22945	0.000100557		ADAMTS20	-2.41263	0.00102736
	PSEN2	1.79579	0.000101878		RP11-1264N5.1	-1.88595	0.00103799
	GRM4	1.73961	0.000102729		RP11-749H20.3	-2.18154	0.00103845
	CYR61	1.81559	0.000103203		ERBB4	-2.86545	0.00104137
	GJC3	2.84081	0.000104124		ANKRD33	-2.68915	0.00104277
	KLHDC7B	4.86512	0.000105263		MLLT3	-2.64805	0.00104777
	AIF1	2.93477	0.000105588		HMP19	-2.64027	0.00104843
	COL7A1	2.50598	0.000105808		TRIM2	-1.73584	0.00104861
	PLAU	3.09658	0.000105889		RSPO2	-2.36041	0.00105962
	RP11-1113L8.6	4.03276	0.000106411		SPATA6	-1.76711	0.0010622
	ESRP2	2.13847	0.000106948		BTAF1	-1.85297	0.00106466
	MANEAL	2.55007	0.000107673		C5orf38	-1.97149	0.00107145
	PRR35	4.22647	0.000108281		RP11-114H24.4	-2.19436	0.00107236
	WNT11	2.27546	0.000109636		STON1-GTF2A1L	-3.64903	0.00107349
	SLIT3	1.65197	0.000110108		RP5-928E24.4	-2.11456	0.00107599
	DENND2D	2.98638	0.000110978		TET1P1	-2.89741	0.00109066
	TMEM217	2.20555	0.000111797		RP11-490H24.5	-4.61062	0.00109137
	AC024592.12	2.70098	0.000111984		DAZL	-1.69658	0.00109273
	RAB25	1.91382	0.00011244		CYP4V2	-1.53986	0.00109734
	FOXA3	1.65592	0.000112497		CTD-2514C3.1	-2.19881	0.00109751
	ANKRD65	2.40776	0.000112632		MAP7D2	-1.74007	0.00109816
	LGR6	2.28176	0.000112983		REG1A	-2.16077	0.00110645
	C9orf135	3.05919	0.00011309		WHAMMP3	-1.63303	0.00110973
	FAM180A	3.69718	0.00011433		RFX4	-3.42161	0.00111581
	SFRP5	2.11507	0.000114622		BNIP3P37	-2.12559	0.00111592
	S100A4	2.253	0.000115639		ANKMY2	-1.66521	0.00111749
	HMX2	2.85642	0.000116675		GLRB	-3.12862	0.00111968
	AREG	4.72573	0.00011695		ENOX2	-1.99373	0.00114262
	SERPINE1	4.49006	0.000116964		CLEC4C	-2.32326	0.00114525
	AQP1	3.83921	0.000117281		DHFRP1	-6.42228	0.00114605
	OR7E12P	2.71159	0.000119086		ZMAT1	-1.72843	0.00115145
	UBE2SP2	5.00278	0.000119617		STOX1	-1.58558	0.00115732
	COL12A1	3.25529	0.000120016		RP3-486I3.4	-3.35514	0.0011615
	TGM1	2.27865	0.000121907		GOLGA8N	-1.5935	0.0011618
	ARHGEF35	2.0961	0.000122089		RPS19P3	-2.12096	0.00116485
	CASQ1	2.50361	0.000123089		GOLGA8B	-1.63004	0.00117041
	SYT3	1.667	0.000123193		CASC1	-2.2219	0.00117374
	SMPDL3B	2.38293	0.000123629		TECRL	-2.11181	0.00117777
	LMO7	2.49834	0.000124096		RP11-204M4.2	-2.14097	0.00118899
	LA16c-380H5.3	5.2459	0.000124308		FCRL3	-2.98055	0.00119226
	ACAP3	1.73483	0.000125534		ZCCHC18	-2.11983	0.00119776
	FAM65B	1.66801	0.000126301		SLC25A1P5	-1.64572	0.00120065
	NFIX	3.14995	0.000126348		PTX3	-1.59538	0.00121236
	AIM1L	1.6041	0.000126871		AATK-AS1	-2.1254	0.0012149
	PIWIL3	2.87203	0.000128036		FBXO15	-1.6842	0.00121872
	TCEAL5	3.80289	0.000128376		CLEC2A	-2.35597	0.00122133
	RILP	1.73762	0.000128753		HDGFP1	-2.17861	0.0012237
	ABCG2	1.9003	0.000129627		RBM24	-1.91647	0.00122495
	TMC4	2.39952	0.000129937		BSND	-1.91289	0.00122827
	NPFF	5.05182	0.000130667		ALX1	-1.78723	0.00122905
	MUC3A	1.73055	0.000130795		EEF1B2P6	-2.4845	0.00123305
	PCDHGB5	2.90646	0.00013085		SETBP1	-1.52858	0.00123492
	JUP	1.58346	0.000131302		MXI1	-2.38246	0.00124001
	TPRG1L	1.56153	0.000131759		DYNC2H1	-2.67408	0.00124288
	SPON2	1.87958	0.000132153		SLCO1A2	-1.77124	0.0012545
	ALOX5	2.40998	0.000132258		NEUROG1	-3.08997	0.00125703
	SLC4A11	2.13375	0.000132573		NBPF8	-2.38013	0.00125985
	MPZL2	1.99642	0.000132796		GATA4	-2.0317	0.00126164
	PLPP2	1.94677	0.000133326		KLRG1	-1.64075	0.00126651
	ABLIM3	3.9126	0.000133526		ALG1L7P	-2.44572	0.00127052
	ZNF562	1.9008	0.000134677		RP11-421N8.1	-2.28582	0.00127556
	RPS2P35	3.26494	0.00013509		ZC2HC1C	-1.60152	0.00127806
	CIDEB	3.07183	0.000135117		ZBTB20	-1.61079	0.00128028
	BAHD1	1.72181	0.000135519		RBM20	-1.84335	0.0012952
	NMRK1	1.74181	0.000135623		RP11-307I14.2	-2.45284	0.00129731
	FAM71E1	2.01909	0.000135709		SLC26A2	-1.7712	0.00130485
	C10orf10	2.13428	0.000135816		KCNA5	-1.6959	0.00130799
	ATP2A3	2.10753	0.000136339		SPDYA	-2.32629	0.00131082
	KLRG2	1.51426	0.000136468		DRP2	-1.62617	0.0013144
	EEF1A1P9	2.40673	0.000138303		ANAPC1P1	-2.0608	0.00132543
	AC009237.8	2.73535	0.000138498		EHF	-2.0608	0.00132543
	AP003419.11	2.48852	0.000139638		HOXB9	-2.71489	0.00132571
	FOXI3	1.6759	0.000139845		JAKMIP1	-2.57849	0.00132917
	CAPN13	2.87012	0.00014042		RP11-178L8.4	-3.16012	0.00132923
	PIPSL	2.51232	0.000140435		ZNF343	-2.08348	0.00133155
	KLHL21	2.4614	0.00014107		AC004383.3	-2.04517	0.00134263
	CDC42BPG	1.57778	0.000141176		SLA2	-2.4978	0.00134352
	RAP1GAP2	2.20051	0.00014135		SRGAP2B	-1.66089	0.00134564
	SPNS2	2.3634	0.000143684		CH507-236L23.2	-2.40735	0.00135603
	LAPTM5	2.99347	0.000144429		CH507-338C24.2	-2.40735	0.00135603
	GABRD	2.42095	0.000144924		SAMD15	-1.60662	0.00135821
	TAGLN2	1.62551	0.000147123		CYP51A1P2	-2.0284	0.00136128
	RASGRP2	2.2548	0.000147421		SERBP1P6	-2.37095	0.00136414
	DAPP1	5.93418	0.000147548		AF131215.1	-2.67307	0.00136833
	EEF1A1P4	2.23046	0.000149319		MSR1	-2.54844	0.00138004
	ANKRD33B	2.21807	0.000149579		AC008074.1	-2.36629	0.001381
	IGLV2-14	3.39257	0.00015014		GOLGA6L4	-3.24638	0.00138425
	PSG1	3.39257	0.00015014		C3orf70	-1.80724	0.00138736
	GAPDHP23	3.39257	0.00015014		SNX29P2	-2.54527	0.00138867
	RERE	1.5926	0.000151766		SFXN2	-1.56842	0.00138976
	ADGRL4	2.93441	0.000152243		FAM13C	-2.87289	0.0013936
	NMNAT2	1.6802	0.000152446		ADRB1	-1.75657	0.00140079
	CTC-484M2.1	2.58816	0.000152589		RLN1	-2.62211	0.00140421
	CAV1	2.67435	0.000153652		PRTG	-3.02958	0.00140973
	SOWAHB	3.08352	0.000154648		GAPDHP51	-2.13256	0.00142784
	C10orf11	1.95293	0.000155206		ACVR1C	-1.59399	0.00142858
	SPATA31C1	2.37064	0.000155461		AC012354.8	-2.07865	0.00143858
	IQSEC2	1.72334	0.000156224		RP11-343B5.1	-2.03045	0.00143864
	RPL13AP5	2.69118	0.000157865		CATIP	-1.79189	0.00144266
	BMP1	1.7045	0.000157954		ZNF705D	-2.30609	0.0014441
	ARHGAP31	2.89219	0.000158584		RAB9B	-2.10485	0.0014464
	KLK10	1.8202	0.000158911		PDE6A	-2.19293	0.00145142
	AZGP1	4.80936	0.000159509		LRRC34	-1.69511	0.00145239
	FHDC1	1.93798	0.000160848		SACS	-1.7571	0.00145241
	COBL	1.74355	0.000161384		IGF1	-2.01362	0.00145362
	DPP7	2.37074	0.000162309		FOXB2	-3.51986	0.00145504
	SLC15A3	1.58273	0.000165142		SLCO6A1	-2.74188	0.00145774
	TYROBP	3.76114	0.000166014		CH17-258A22.4	-1.77968	0.00146036
	MYBPC2	1.98897	0.000166122		FAM60DP	-2.77788	0.00146048
	CAT	4.59329	0.000166347		GOLGA8R	-1.79138	0.00146943
	PSMB9	2.51738	0.000166646		MESP1	-4.21826	0.00147281
	TFCP2L1	3.42148	0.000166899		ATP2B1	-1.77991	0.00147773
	FGF16	2.87859	0.000168394		CMB9-22P13.1	-2.67093	0.00148484
	MFGE8	1.77709	0.000168477		XCL1	-2.49263	0.00149381
	SVOPL	2.07984	0.000168792		USP26	-2.42265	0.00150132
	LTB	3.29675	0.000170401		POTEH	-2.45025	0.00150165
	GATA2	3.09754	0.000170712		RP11-313E4.1	-2.15388	0.00150315
	CTGF	1.62702	0.000170741		ARID4A	-1.60388	0.00151227
	SLC18A2	2.54523	0.000171076		BTBD8	-2.26692	0.00151358
	RTN2	1.52225	0.000171335		SAA2	-3.40599	0.00153605
	KCNE1B	4.53532	0.000172351		LPAR4	-1.63022	0.00153684
	GCNT4	3.20466	0.00017466		ATE1-AS1	-2.48851	0.00155334
	CTD-2270N23.1	3.1867	0.000175618		SAMD3	-2.12454	0.00155539
	RNF144B	2.20611	0.000176533		PGM5P2	-1.89745	0.00155757
	ATP6V0A4	2.55983	0.000182772		ELMOD1	-1.52194	0.00156925
	SETD1B	1.99163	0.000185402		PLCB1	-1.61422	0.00157587
	FNDC10	1.60572	0.000188658		RP11-759L5.2	-2.53409	0.00160638
	ZC3H12A	1.69388	0.000188918		ZNF536	-3.78635	0.00161324
	IFI6	2.92475	0.000189315		TUBB8P1	-2.41921	0.00161395
	RP11-550F7.1	2.23782	0.000189536		RP11-98J23.2	-2.22557	0.00161736
	TMEM173	3.54888	0.000190544		KBTBD11	-1.66538	0.00162413
	CHADL	2.55856	0.000190597		KCNMB3	-1.81151	0.00162591
	TMEM40	4.44199	0.000190781		CHD9	-1.63203	0.00163021
	HSD3B7	2.18454	0.000190813		PCDH11X	-2.34344	0.00164521
	AHNAK	1.67858	0.000191264		RP11-83A24.1	-2.34984	0.00164552
	MAPK11	2.17613	0.000194002		RP11-307A17.2	-1.82964	0.00164737
	KRTCAP3	1.64705	0.000194553		WNT9B	-1.97936	0.00165239
	EPGN	5.53355	0.000194921		SLC35F4	-2.27504	0.00165519
	PTPRN2	2.16606	0.000195018		PM20D1	-2.13479	0.00166576
	KLRF1	3.22945	0.000195266		SPTY2D1-AS1	-1.50568	0.00167895
	TRGV7	3.22945	0.000195266		RP11-484L7.1	-2.02402	0.00167951
	ACTL6B	2.26174	0.000195564		CAB39P1	-2.04456	0.00169358
	ICOSLG	2.95686	0.000197114		FSHR	-2.25287	0.00169787
	CTHRC1	2.00667	0.000199086		UQCRFS1P1	-4.67703	0.00170414
	PRSS8	1.54381	0.000200124		WHAMMP2	-1.7729	0.00172177
	BEST2	2.46077	0.000200726		SLC9A2	-1.9644	0.00172475
	ZNF559-ZNF177	3.49392	0.000200765		RPS15AP10	-2.39628	0.00172616
	KRT18	2.20852	0.000202067		MNS1	-2.08994	0.00172987
	PDGFB	3.96672	0.00020254		CSPG4P12	-1.86593	0.00173122
	LMTK3	1.59421	0.000202644		FLRT3	-2.70135	0.00174119
	PPP1R1B	1.67526	0.000204096		RP11-529A4.12	-2.14298	0.00174652
	PERM1	3.22556	0.000205305		FZD1	-1.63181	0.00174963
	FAM83G	1.50693	0.000206129		OR10V3P	-2.19274	0.00175654
	ISG15	1.85699	0.000206424		SLC9B1	-1.98982	0.00176045
	SMOC2	3.04885	0.000206515		ETFBKMT	-1.60214	0.00176906
	CLEC4G	4.83866	0.000208112		TRPC5	-2.01319	0.00177586
	HNRNPA1P33	2.68179	0.000211937		TUBB7P	-2.25273	0.00177955
	CTD-2554C21.2	1.69329	0.000213025		RP11-87C12.2	-1.99715	0.001781
	CAPS	1.83476	0.000214118		RPS12P21	-2.72313	0.0017971
	PTGS2	3.72042	0.000214932		ANGPT1	-2.25236	0.00180468
	FBXL16	1.81013	0.000215437		LRRC63	-2.18839	0.00180636
	AHSP	4.06036	0.000216403		KRT17P5	-2.07415	0.00181199
	CYP2S1	1.99911	0.000218308		ZFHX3	-2.26466	0.00181282
	AF186192.5	3.47378	0.00021959		CRH	-2.26336	0.00181808
	PRR5-ARHGAP8	3.07248	0.000220174		SCAPER	-1.77605	0.00182419
	OXCT2P1	2.21435	0.000220344		AC009487.6	-3.42552	0.0018305
	DOC2B	1.9465	0.000221245		FAM227A	-1.92019	0.00183723
	KRT223P	3.51408	0.000222082		SLC3A1	-2.32564	0.00185644
	COL8A1	2.69771	0.000222526		POU3F3	-2.09598	0.00187624
	PLEC	1.90793	0.000226314		KIF25	-1.94095	0.00188665
	RPL7P6	3.32105	0.000226754		ZNF112	-1.64791	0.00189625
	RP11-346M5.1	3.22568	0.000227075		GSTM1	-1.52399	0.00189911
	EID3	2.23826	0.000228165		PCDHGB6	-1.66486	0.0018998
	WNK4	2.71702	0.000230316		ENPP4	-2.23809	0.00190366
	FTL	1.66461	0.000230515		GAPDHP63	-2.15118	0.00190448
	RPL32P34	2.94379	0.000230904		RP11-174O3.1	-1.99686	0.00190808
	KRTAP2-3	5.80601	0.000231536		RP11-903H12.5	-3.61923	0.00191255
	DPPA5	4.28538	0.000232674		ONECUT2	-2.10537	0.00191616
	PNPLA5	2.56679	0.000234585		AP000568.2	-2.57304	0.00191691
	KLF16	1.75146	0.000235733		GABRB2	-2.76867	0.00191932
	MAG	2.7278	0.000237544		GBP6	-2.35889	0.00192694
	KIF17	1.69837	0.000238142		AC243687.1	-2.27165	0.00194044
	AADACL3	5.61888	0.000238431		RP11-460G11.2	-2.27216	0.00195023
	FAM212B	2.15534	0.000240717		CNN2P1	-2.97595	0.00195097
	IFI35	2.21899	0.000244871		CCDC175	-1.94594	0.00195168
	AK5	1.70071	0.000245063		FADS6	-1.71928	0.00195402
	MYO7B	2.79134	0.00024582		PCDHGC4	-1.54895	0.00195807
	ZG16B	3.60384	0.000246222		CNTNAP3P2	-2.58363	0.00195856
	VASP	1.72591	0.000246367		LRRIQ1	-3.00333	0.00197426
	AC009133.22	2.86424	0.000246897		RP11-434D2.9	-1.68464	0.00197552
	MXRA5Y	4.05868	0.000247245		SLC39A12	-2.11272	0.00197654
	KISS1	4.50384	0.000247553		OXGR1	-1.67324	0.00198853
	EPCAM	1.8501	0.000248027		RP11-757F18.3	-1.97342	0.00199768
	UPK3B	2.23896	0.000248388		RPS20P33	-2.40266	0.00201491
	RPSAP17	3.56209	0.000249168		AC004967.7	-1.78583	0.0020165
	JADE2	2.39622	0.000249301		RP1-182O16.1	-2.1426	0.0020167
	DPPA3	3.31268	0.000250147		PPP1R3E	-1.50105	0.00202637
	RP11-478C6.6	4.56469	0.000250625		SCN11A	-1.87756	0.00203313
	CERCAM	1.70229	0.000252907		RP11-551L14.7	-2.45114	0.00203461
	SYNE4	1.64507	0.000256954		PHKG1	-3.11758	0.00203547
	HAND2	3.09561	0.000258891		TMEM155	-2.089	0.00204332
	GADD45B	2.28844	0.000259209		MAGEB10	-1.99375	0.00204504
	LRRN4	3.21387	0.000259523		AC159540.14	-2.34842	0.00206438
	INSC	3.41712	0.00026077		AC108039.1	-1.96008	0.00206656
	MAFB	1.85402	0.00026178		LHFPL5	-1.666	0.00206991
	FAM60BP	3.20209	0.000262805		AC009014.3	-3.77551	0.00207441
	EPPK1	2.31184	0.000263205		PCDHB1	-1.9944	0.00209062
	KLK8	3.01082	0.000263845		RP11-266L9.1	-2.16497	0.00209279
	CPLX2	2.60324	0.000264742		TENM4	-1.5657	0.00210604
	MBP	2.02727	0.000264744		C11orf45	-1.64077	0.00210827
	SLC25A3P1	3.94563	0.000264849		NHS	-2.16638	0.00211227
	FNBP1P1	3.11248	0.000265099		GLYATL1P2	-1.94647	0.00211779
	RBP7	2.47661	0.000265271		NSRP1P1	-2.00483	0.0021197
	MT-ND1	1.81702	0.000266207		BRCA2	-2.12822	0.00212977
	CSF1	1.77338	0.000267019		WISP2	-2.285	0.0021302
	NBL1	1.7717	0.000269062		PDE1A	-2.39764	0.00213635
	USP43	2.1947	0.000271127		CFAP43	-2.815	0.00214006
	HLA-DRB3	2.71165	0.000271271		CCDC129	-1.90845	0.00214878
	ZNF582	1.82883	0.000272136		ENKUR	-1.82554	0.00215516
	TFEB	1.85333	0.00027766		ASIC1	-2.01292	0.002199
	PIFO	1.60981	0.000278462		SPOCK3	-2.3879	0.00220703
	DRAM1	1.70156	0.000278724		PHIP	-1.90869	0.00221062
	LAMA5	1.53952	0.000279072		MEIS3P2	-1.56931	0.00222641
	ZYG11A	1.93117	0.000280228		CFAP47	-2.523	0.00222712
	C14orf39	1.82788	0.000280612		FAM167A	-1.615	0.00222757
	TICAM1	2.64741	0.000280936		RP11-142C4.4	-2.194	0.00222947
	PRKCZ	1.52915	0.000281835		ZNF440	-2.14545	0.00223292
	RP11-108O10.8	3.02877	0.000282751		TPH1	-1.70834	0.00224015
	MTCO1P40	4.16677	0.00028344		SERPINC1	-1.99358	0.00224452
	SYP	1.95389	0.000284364		CATSPER2P1	-1.74309	0.00224875
	GDF15	2.38114	0.000286555		SEC1P	-2.06207	0.00225255
	SCT	3.06291	0.000287246		C1orf162	-2.81164	0.00225536
	LRP10	1.70169	0.000288111		KIAA1715	-2.00182	0.00226901
	CXCL16	2.27056	0.000289509		NBPF20	-1.72476	0.00227554
	FAM83A	1.7792	0.000294915		TRDC	-2.02556	0.00227841
	RGCC	3.02168	0.000295179		PEX11A	-1.81304	0.00228331
	CADPS2	1.50387	0.000297156		LINC00890	-2.37102	0.00228386
	BLVRB	1.74278	0.000297405		TCEA1P2	-3.33885	0.00228388
	EDARADD	1.83931	0.000297923		PTPRZ1	-1.69619	0.00228434
	VGLL1	5.56404	0.000299243		AKAP9	-2.0181	0.00228446
	NKX1-2	2.9586	0.000302225		STK24P1	-2.2565	0.00231362
	JPH2	2.825	0.000306113		FAM133A	-2.99692	0.00233943
	RP11-630I5.1	2.97741	0.00030899		AC009967.3	-1.97252	0.00234233
	TUBBP10	3.97249	0.000309279		C17orf50	-2.39699	0.00234891
	MX1	1.7205	0.000309968		HSP90AB2P	-2.40017	0.00236428
	ZSCAN10	2.18615	0.000313479		IL7	-2.1767	0.00237014
	TMCO4	2.16592	0.000313741		CICP4	-1.8801	0.00237402
	VEPH1	1.85082	0.000315031		LRRK2	-2.03773	0.00237926
	SFXN3	1.82618	0.000316752		OPRM1	-1.7774	0.00239226
	CSRNP1	1.90174	0.000320503		CDH12P2	-2.26893	0.00239237
	GRIN1	5.22696	0.000321713		RP11-50D9.1	-2.00459	0.00239789
	SLITRK6	2.79408	0.000322811		SYNM	-1.50131	0.00239974
	CTD-3074O7.11	1.55706	0.000324284		RP11-38O23.4	-3.28948	0.00240859
	RPS3AP49	3.97874	0.000325854		RP11-347J14.4	-2.07332	0.00241695
	TNKS1BP1	1.67012	0.000326877		FAM19A1	-2.07332	0.00241695
	IFIT3	2.53099	0.000328615		SLC25A36	-1.85313	0.00241982
	AHNAK2	1.90118	0.00032879		FBXL2	-1.92518	0.00242688
	KCNS1	2.43773	0.000332068		HERC2P10	-2.32707	0.00244164
	BNIP3P17	4.96468	0.000334501		GPR150	-2.08955	0.00244579
	EEF1A1P11	2.30788	0.000342154		CCDC144A	-1.67155	0.00244626
	ZNF177	4.13857	0.000344658		HIST1H4J	-1.8694	0.00245165
	C6orf132	2.36778	0.000345534		TAS2R19	-1.70195	0.00245282
	AIPL1	2.29924	0.000346324		RP11-632C17__A.1	-2.2212	0.00246201
	BBC3	1.71836	0.000346336		OR11A1	-1.87994	0.00246445
	YIPF7	3.40028	0.000348374		RPSAP28	-2.97294	0.00249395
	AIM1	2.28067	0.000351887		KYNU	-1.51521	0.0024957
	GPR160	1.77136	0.000353283		AC012314.2	-3.44421	0.00249823
	TNXB	2.95094	0.000355205		AC012314.1	-3.44421	0.00249823
	LLNLR-285B5.1	3.85052	0.000357716		AC012314.3	-3.44421	0.00249823
	PGAP3	1.50884	0.000358115		AC012314.6	-3.44421	0.00249823
	CLDN9	2.33391	0.000360123		AC012314.5	-3.44421	0.00249823
	FTLP3	2.58405	0.00036199		AC012314.4	-3.44421	0.00249823
	IL17RE	2.19478	0.000362979		ABC14-864958H18.2	-2.53278	0.00250002
	CD69	3.20173	0.000364171		CDX4	-2.55971	0.00250316
	HID1	1.8488	0.000366161		NTN5	-1.63478	0.00250759
	PLEK2	4.21834	0.000366212		RP11-1016B18.1	-2.73565	0.00252483
	PLEKHF1	1.59023	0.000368094		EPHB1	-1.73644	0.00252932
	CPTP	1.55467	0.000368187		FBXW11P1	-2.35781	0.00253005
	ADAMTSL5	2.31493	0.000373872		TAS2R14	-2.60353	0.00253707
	ELF3	2.72798	0.000382492		AMD1P4	-2.08608	0.00254284
	HRASLS5	1.71758	0.000383499		RP11-536C10.3	-1.65805	0.00256938
	MGLL	4.2044	0.000385906		MYBPC1	-5.04306	0.00257856
	RP11-12M9.4	2.75475	0.000386673		GTF2H2C_2	-2.90704	0.0025794
	RP11-734J24.1	2.42317	0.000386711		ANOS1	-2.04736	0.00258989
	ECEL1	1.879	0.000388946		MAN1A2P1	-2.92107	0.00259403
	SCNN1B	3.72501	0.000389335		WDR60	-1.51298	0.00260493
	ACTBP1	2.56028	0.000389754		PRKG1	-1.75107	0.00261115
	GSDMD	1.57385	0.000390282		ZNF799	-1.61783	0.00261716
	TMBIM1	1.63502	0.000392978		PCDHA5	-1.87476	0.00261862
	RP11-203F10.6	3.45554	0.000393245		IGLV1-47	-2.01641	0.00262169
	SH2D3A	2.1888	0.000394598		RPS15P9	-2.01641	0.00262169
	C16orf74	1.90394	0.000396052		AC213203.1	-1.63433	0.00263194
	CNN1	2.49478	0.000396263		AC000095.12	-3.26774	0.00263513
	CPA4	2.98387	0.000397297		ZNF292	-1.83711	0.00264862
	APOBEC3H	2.27019	0.000404491		C5	-2.36045	0.00265876
	ELF4	1.59565	0.000405849		FRMD3	-1.7479	0.0026664
	CTD-3035D6.1	3.73587	0.000405959		HIST1H2AE	-1.60236	0.00267749
	SRPX2	3.41055	0.000406878		SDAD1P1	-1.68787	0.00268505
	AKR1C3	2.21138	0.000418025		TPRG1	-1.55718	0.00270027
	CGB8	4.68751	0.00041973		ATRX	-1.90156	0.00273333
	ERICH5	2.65207	0.00042286		ST8SIA2	-1.67807	0.00273439
	SYN3	1.57473	0.000423631		RP11-266L9.6	-2.09835	0.00274403
	STAP2	1.76233	0.000424993		RP11-64D22.1	-2.58433	0.00275076
	RAB17	3.34707	0.000434998		NKTR	-1.60414	0.0027527
	CASP4	2.02341	0.00043656		INGX	-2.01159	0.00275912
	FTH1P4	2.69643	0.000437263		BEST1	-1.63583	0.00276114
	GPR25	2.69643	0.000437263		KB-1980E6.2	-2.57814	0.00276192
	AGAP13P	2.69643	0.000437263		TBC1D32	-2.26204	0.00277322
	ACTP1	2.69643	0.000437263		RP11-579D7.8	-1.86737	0.00278205
	PPIAP6	2.69643	0.000437263		RPL21P3	-1.89711	0.00280685
	RPS4XP7	2.69643	0.000437263		KCNK10	-1.66914	0.0028452
	H3F3AP5	2.69643	0.000437263		PPP1R3C	-2.36083	0.0028454
	RP11-5P22.1	2.69643	0.000437263		SNX18P7	-1.90411	0.00286415
	HSFX2	2.69643	0.000437263		EFCC1	-2.50861	0.00287052
	HSPD1P21	2.69643	0.000437263		RPLP1P13	-2.0162	0.00287512
	KB-1125A3.13	2.69643	0.000437263		OR2C1	-2.0162	0.00287512
	KRT8P13	2.69643	0.000437263		HIST1H3J	-3.09252	0.00288588
	RPL23P10	2.69643	0.000437263		HIST1H4C	-3.09982	0.00289373
	SLC35G6	2.69643	0.000437263		PHBP13	-1.8673	0.00290022
	KRT18P24	2.69643	0.000437263		KRT18P55	-1.8673	0.00290022
	RPL7P47	3.31949	0.00043855		RPL7P5	-1.82793	0.00290323
	MYO18B	2.30196	0.000439882		MYZAP	-2.91234	0.00290376
	IL24	4.73429	0.000441685		C1QTNF3	-1.67088	0.00292926
	PAH	2.74645	0.000442612		C22orf46	-1.75192	0.00293146
	MEIOB	1.54256	0.000449112		AC009413.2	-1.86085	0.00293249
	RPSAP19	4.10883	0.000457673		PGAP1	-1.52914	0.00293476
	HNRNPA3P12	3.60329	0.000458645		GP1BB	-4.1469	0.00293817
	NPM1P24	3.66306	0.000462332		CABP4	-2.30287	0.0029409
	SMIM10L2A	1.8838	0.000469082		CHRNA3	-2.07535	0.00294452
	RP11-488L18.1	2.85695	0.000471959		GREB1L	-1.76096	0.00294665
	RP11-507E23.1	2.85695	0.000471959		PFN1P2	-3.51434	0.00295979
	CD44	1.73629	0.000478264		AC005176.2	-2.18795	0.00298207
	RPS15AP1	2.54438	0.000478639		RPL9P29	-2.17602	0.00298231
	APBB1IP	2.40084	0.000479068		CYBB	-1.94538	0.00300063
	CXCL8	6.1533	0.000482924		TMEM31	-2.99082	0.00301018
	TRIM55	2.9502	0.000487313		PATE4	-1.74356	0.00301526
	MAFK	2.05159	0.000489537		DCD	-1.89274	0.00302245
	PRRX1	2.45645	0.00049119		KIAA2022	-2.20449	0.00302748
	PHOSPHO1	2.92161	0.000500032		CERKL	-1.57566	0.00305901
	IRF2BPL	1.51817	0.000500906		QRFPR	-2.11105	0.00306192
	LHX5	1.71516	0.000503274		H3F3AP6	-1.91265	0.00307375
	RP5-1187M17.10	2.04397	0.000503777		RP1-152L7.5	-2.45536	0.00309342
	HNRNPA1P12	3.5357	0.000504545		ULK4P1	-3.22529	0.00309587
	MXRA5	2.21439	0.00050551		HIST1H1D	-2.95527	0.00310636
	LINC01057	1.63655	0.000506566		DDX50P1	-2.82284	0.00311006
	MTRNR2L3	2.5861	0.000513183		ZNF546	-2.76941	0.00311475
	BCAR1	1.69389	0.000516571		SKAP2	-1.54248	0.00314361
	RP1-278E11.3	3.68757	0.000517114		C17orf100	-1.72394	0.00314642
	CD248	1.98269	0.000520536		SNX10	-1.53111	0.00314684
	RAMP1	3.39559	0.000528452		PFKFB1	-1.91691	0.00315277
	ZYX	2.02697	0.000529006		CHL1	-3.45955	0.00316952
	TAP2	1.76159	0.000531344		RPLP1P11	-2.54117	0.00318647
	TMEM249	2.64502	0.000533329		GDF10	-2.78544	0.00319204
	ERG	3.01696	0.000533915		RP11-295H24.3	-1.86324	0.00323681
	FILIP1L	1.85487	0.000536968		PLCXD3	-1.98764	0.00323682
	PRRX2	2.04614	0.000537489		ARR3	-2.70518	0.00325813
	SLC12A1	4.03059	0.000538114		CLEC2D	-1.53751	0.00326719
	CTD-2587H24.4	3.1028	0.000538345		IGFALS	-2.16599	0.00327203
	MOS	3.1028	0.000538345		RAD51C	-1.57857	0.00328215
	USHBP1	1.55844	0.000539093		C5orf49	-1.57592	0.00329726
	SLC30A8	3.74881	0.000540227		POM121L7	-1.96772	0.00329756
	ESR1	3.8425	0.000540684		CEP290	-2.0738	0.00330168
	TPTE2P3	2.45177	0.00054073		AC006509.7	-1.77083	0.00333333
	AC009237.17	2.45177	0.00054073		AC018641.7	-1.70994	0.00333549
	FAM177B	2.45177	0.00054073		HMGCS1	-1.57729	0.00335726
	AC009238.7	2.45177	0.00054073		ANKRD26	-1.91238	0.00336835
	RP3-406A7.3	2.45177	0.00054073		HRH4	-1.557	0.0033749
	RP11-347H15.5	2.45177	0.00054073		AC080125.1	-1.77092	0.00337984
	RP11-365F18.1	2.45177	0.00054073		RP11-466F5.6	-1.77092	0.00337984
	RP11-389O22.5	2.45177	0.00054073		CCDC170	-1.93334	0.00339093
	RP11-466C23.5	2.45177	0.00054073		PYGO1	-1.58876	0.00341169
	RP11-466F5.3	2.45177	0.00054073		MARCH1	-1.6552	0.00341963
	RP11-603K19.1	2.45177	0.00054073		CRYBA4	-1.53825	0.00342774
	RP11-72H11.1	2.45177	0.00054073		ENOX1	-1.79735	0.00344014
	RP11-77O7.1	2.45177	0.00054073		DNAH10OS	-1.67043	0.0034651
	RP11-94D20.1	2.45177	0.00054073		CDNF	-1.61624	0.00346657
	RPL18AP8	2.45177	0.00054073		GVINP1	-1.69445	0.00347012
	AC016142.1	2.45177	0.00054073		GOLGA8H	-2.96753	0.00354473
	RPL21P5	2.45177	0.00054073		SENP8	-1.5104	0.00355043
	RPL22P11	2.45177	0.00054073		BIVM	-1.82279	0.00356696
	RPL7P56	2.45177	0.00054073		CLVS2	-1.75221	0.00357248
	RPS24P18	2.45177	0.00054073		RXRG	-2.26751	0.00358729
	RPS27P20	2.45177	0.00054073		RP4-730K3.3	-2.02805	0.0035887
	RXFP3	2.45177	0.00054073		THOC2	-1.51195	0.00358887
	SEPT10P1	2.45177	0.00054073		ADAM32	-1.56109	0.00361362
	ST13P10	2.45177	0.00054073		DPY19L1P1	-1.52061	0.00362101
	TEX13D	2.45177	0.00054073		CCDC39	-1.76225	0.00362763
	RP11-220I1.4	2.45177	0.00054073		KCNG4	-2.07626	0.00366522
	RP11-140L24.3	2.45177	0.00054073		TSPAN18	-1.52607	0.00366717
	RBPMS2P1	2.45177	0.00054073		SOX5	-1.91506	0.00368124
	PSMC1P2	2.45177	0.00054073		RPS4XP5	-2.73482	0.00370288
	AC104981.1	2.45177	0.00054073		FSD1L	-1.82279	0.00373531
	AC136616.1	2.45177	0.00054073		AC063976.7	-1.52363	0.00375844
	AC144838.3	2.45177	0.00054073		CHST5	-1.73075	0.00376022
	AL133335.1	2.45177	0.00054073		PPFIA4	-2.0365	0.0037814
	ATP5JP1	2.45177	0.00054073		BNIP3P28	-1.87843	0.00380236
	CCR5	2.45177	0.00054073		EGLN1	-2.16466	0.0038423
	CD1C	2.45177	0.00054073		TNFSF14	-1.57109	0.00384942
	CD300LB	2.45177	0.00054073		HERC2P2	-1.61904	0.00386879
	CXCL10	2.45177	0.00054073		FAM166A	-2.42401	0.00387354
	FAM86LP	2.45177	0.00054073		AC241377.1	-3.10325	0.00389939
	GSTA3	2.45177	0.00054073		FAM161A	-1.99781	0.00390755
	HMGB1P4	2.45177	0.00054073		CRX	-1.92609	0.00391103
	HOXD8	2.45177	0.00054073		TLR10	-1.82423	0.00391851
	IGKV1-17	2.45177	0.00054073		ST6GALNAC5	-1.59327	0.00392964
	KRT18P39	2.45177	0.00054073		RPS4XP6	-2.37569	0.00393121
	KRT6B	2.45177	0.00054073		TMEM233	-2.05213	0.00395455
	KRTAP10-2	2.45177	0.00054073		NME5	-1.62771	0.00398069
	MTND2P9	2.45177	0.00054073		ARG1	-1.83234	0.00398403
	MTND4LP5	2.45177	0.00054073		BEND5	-1.67853	0.00399423
	TPI1P4	2.45177	0.00054073		RP11-503N18.5	-1.58114	0.00404335
	COL14A1	1.52742	0.000541604		OLA1P3	-1.77767	0.00405529
	C2orf40	2.03002	0.000541928		TRPM8	-1.66794	0.00406094
	NFE2	2.37572	0.000541953		PCDHA3	-1.89046	0.00406912
	SLC44A4	2.35654	0.000541975		SST	-2.42918	0.00409815
	RP11-183G22.1	2.41488	0.000544932		CFAP69	-1.68971	0.00409879
	GRHL3	3.42134	0.000547683		GPR83	-1.60657	0.00410624
	UBD	3.68148	0.000548389		SOX6	-2.35434	0.00411542
	RP11-538P18.1	2.20948	0.000556895		PTPN13	-1.67172	0.00414123
	TEX43	2.9424	0.000556944		NEUROD4	-4.57151	0.0041693
	FAM46D	2.9424	0.000556944		ZDHHC17	-1.55658	0.00417961
	AC006538.4	2.9424	0.000556944		EPHA7	-2.35081	0.00418293
	BTF3P2	2.85694	0.00055762		TMEM262	-1.67429	0.00418785
	NKAPL	2.85694	0.00055762		TACR1	-2.34887	0.00421742
	RPS27P14	2.85694	0.00055762		PABPC1P7	-1.82695	0.00422354
	KB-1125A3.14	2.85694	0.00055762		SLC13A5	-1.53364	0.0042392
	AD000091.3	2.85694	0.00055762		GAPDHP22	-1.69626	0.00428453
	CTD-2138O14.1	2.85694	0.00055762		TTC23L	-1.61584	0.0042871
	TFEC	2.85694	0.00055762		KIAA1109	-1.84004	0.00429045
	CRISP2	2.85694	0.00055762		CTD-2510F5.6	-2.53279	0.00429292
	SYK	2.30076	0.000560141		ASPA	-1.8802	0.00431673
	DPPA2	2.20024	0.000560295		SREK1	-1.65275	0.0043227
	MTATP6P1	2.5303	0.000567407		RP11-507K13.6	-1.74665	0.00432743
	UCMA	2.55183	0.000567754		RP11-727F15.14	-1.89572	0.00434932
	FCER2	3.99541	0.000568179		FAM184A	-1.79094	0.00436262
	MEOX1	2.9477	0.000572616		CTD-2206N4.4	-1.66932	0.00437457
	JSRP1	1.9103	0.000573222		RP11-484L7.2	-2.15257	0.0043963
	KLK4	2.45095	0.000576172		MYBL1	-1.93265	0.00440717
	PARP9	1.58719	0.00057786		LEAP2	-1.80225	0.00441746
	VGF	2.39149	0.00059841		MMP8	-1.77621	0.00442639
	SLC30A2	2.34625	0.000599035		CBX5P1	-1.83681	0.00442688
	TFAP2C	1.6396	0.000603135		CFHR3	-2.12429	0.00445061
	TNFRSF18	2.88722	0.000605856		PURG	-1.71433	0.00449993
	SOCS3	1.74508	0.000618412		CBY3	-2.10066	0.00451431
	SLC6A17	2.35987	0.00061966		AZIN2	-1.53984	0.00453628
	CEACAM1	2.24414	0.000624366		RP11-848G14.5	-3.68274	0.00453936
	DBNDD1	2.01199	0.000627164		SV2C	-1.54941	0.00453971
	MROH1	1.79833	0.00063262		RP5-837J1.1	-2.24558	0.00453974
	ACTBP8	3.10778	0.000633882		SPP2	-2.00321	0.00454261
	RHOV	1.89002	0.000634624		DNAJA1P2	-1.89068	0.00454978
	AF165138.7	1.99398	0.000636743		NEK5	-1.65122	0.0045533
	NDUFC2-KCTD14	2.45958	0.000637228		APOF	-2.00778	0.00456615
	TLE6	1.90982	0.000637964		NACAP1	-1.60315	0.00457357
	CCDC68	2.2942	0.000638292		RP11-435I10.4	-1.83494	0.00462301
	CARD10	1.61233	0.000638809		EBLN2	-2.68106	0.00464105
	UCN2	2.83649	0.000640637		EBF1	-2.05555	0.00471884
	CNTN1	2.08202	0.000642282		SEMA3A	-1.54209	0.00476898
	RASGRP4	1.51469	0.000643411		RP11-146B14.1	-3.71572	0.00477651
	MYOT	4.00073	0.000643861		EYA1	-1.87486	0.00479409
	DAMA-236L13.20	1.95766	0.000647026		RP11-217O12.1	-2.10215	0.00479855
	CFAP57	1.81755	0.000661868		CCDC102B	-1.56548	0.00481267
	ETV5	2.14646	0.000668051		FAM221B	-1.81801	0.0048209
	RPS3AP44	2.40033	0.000671663		ABCA11P	-1.68814	0.0048309
	C1orf87	3.47923	0.000676552		RP11-571M6.15	-2.44865	0.00483351
	BCAN	1.93079	0.000678345		ACTG1P17	-1.61092	0.00483915
	RP11-686D22.3	4.23082	0.000679451		RSPO1	-1.51794	0.00484892
	ZNF585B	2.33811	0.000680431		FAAHP1	-2.49617	0.00487421
	CORO7-PAM16	6.19524	0.000682414		KLHL32	-1.94096	0.00487538
	ANKRD1	2.11972	0.000691984		CTD-2192J16.24	-2.43375	0.00488612
	ACTG1P12	3.13762	0.000694214		HMGCLL1	-2.17703	0.00492542
	EMP3	1.66605	0.000699549		NHLH1	-1.9307	0.00494127
	EIF5AL1	1.95487	0.000701046		CACNA1S	-2.0306	0.00495054
	CA4	1.9587	0.000705704		XXbac-B562F10.11	-2.46594	0.00495939
	MRS2	1.59118	0.000708176		RPSAP48	-2.11955	0.00495995
	DTX2P1	1.87204	0.000708885		ZNF23	-1.72416	0.00500307
	AL049829.1	2.04099	0.000714864		FBXL22	-2.44966	0.00501053
	TBX2	4.8723	0.000715937		KATNAL1	-1.54359	0.00501437
	PSD4	1.94819	0.000716528		C2orf72	-1.64954	0.00503292
	CAP2P1	2.87147	0.000720218		SDHAF4	-1.70584	0.0050353
	HMOX1	2.09591	0.00072117		DUOXA2	-2.48034	0.00504302
	SERPINF2	1.86546	0.000721672		PLCL1	-1.84573	0.00504814
	SAMD9	4.35092	0.000726062		MAP9	-1.60332	0.00507486
	RP11-353H3.1	2.80989	0.000728011		PFKFB4	-2.31589	0.00510257
	NIPAL4	3.6976	0.000728962		SGK2	-2.35975	0.00512161
	SPTSSB	2.31109	0.000730019		CHRD	-1.98197	0.00514482
	CTC-575D19.1	2.43802	0.000731568		PSG2	-2.49013	0.00515734
	TM4SF1	2.44672	0.000732443		IKZF2	-1.56142	0.00517133
	LGALS12	2.3405	0.000742094		RBM22P2	-1.5081	0.00517707
	BATF3	2.49752	0.000743683		RP11-1277A3.2	-3.52123	0.00523915
	UQCRHL	1.90259	0.000750405		ZNF594	-1.63355	0.00529419
	GALNT6	1.79794	0.000755148		SLC22A25	-2.12132	0.00529873
	NCF4	3.04046	0.0007623		RP11-216M21.1	-1.80523	0.00529911
	LYPD5	1.99563	0.000763672		H2AFY2	-1.74319	0.00530008
	TRPM2	3.38669	0.000763813		NDNF	-1.96764	0.00530595
	SYNDIG1L	1.83069	0.000765827		DUTP6	-1.62619	0.00530803
	LCN2	2.57404	0.000768094		LOC440461	-1.62619	0.00530803
	NPAS4	3.80008	0.000770127		CPA2	-2.23118	0.00531624
	SYNC	3.19122	0.000774682		MTSS1	-1.50834	0.00532558
	RP11-25I15.1	3.20685	0.000779566		BARHL2	-2.63185	0.00533867
	RPL7P15	3.22789	0.00079015		CDC7	-1.52295	0.00536128
	AC025750.5	2.85899	0.000792685		SMKR1	-2.51123	0.00538244
	ADAMTS15	2.29638	0.000799555		SFRP4	-1.96198	0.0053832
	SMPD1	1.52695	0.000803577		GLRA1	-3.43971	0.00538823
	AC098831.4	3.50538	0.000804057		AC156455.2	-1.56792	0.00539798
	CTD-3222D19.2	3.10474	0.00080566		RNF150	-1.85863	0.00540057
	C1QC	3.10474	0.00080566		CCDC81	-1.50137	0.00542961
	EMP1	2.99147	0.000807932		SAXO2	-2.39464	0.00544709
	CGNL1	1.9208	0.000808981		CLK4	-1.63789	0.00544925
	RP11-101E3.5	3.27146	0.00080916		RPL10L	-2.88479	0.00547447
	RP11-599B13.6	3.39689	0.000810751		XKR9	-1.50319	0.00549601
	RPSAP45	3.07723	0.000811689		TKTL1	-2.30163	0.00550998
	ITLN2	2.19169	0.000814035		PMP2	-2.05582	0.00551874
	APOA5	2.41728	0.000814742		OR2C3	-1.6774	0.0055301
	KLC3	1.7347	0.000821981		PLEKHS1	-2.02975	0.00553592
	ACTA1	4.04516	0.000824478		FAM90A28P	-2.07495	0.00555111
	GREM1	2.83079	0.000826943		RPS3AP6	-3.17914	0.00555271
	ARHGEF34P	2.49341	0.000828031		C4orf47	-2.05277	0.0055556
	FNDC1	4.11282	0.000828281		RP11-24B13.2	-1.97894	0.00556194
	PLA2G4C	1.85937	0.000832307		MAJIN	-1.89492	0.00556197
	SH3RF2	1.81855	0.00083634		HOGA1	-2.52295	0.00556679
	AC012005.1	2.94891	0.000841543		ZNF37BP	-1.63691	0.00557494
	AC006386.1	2.94891	0.000841543		DMRTC1B	-1.72837	0.005621
	ARHGEF5	1.94743	0.000844587		PTPRVP	-2.33848	0.00564941
	BCAM	1.81105	0.000846027		RP13-512J5.1	-1.64909	0.00567303
	TIE1	1.69581	0.000849586		SLC5A2	-1.54005	0.00569292
	RP11-96L14.7	2.33088	0.000851393		RP11-77K12.1	-2.40766	0.00575332
	CCK	2.29125	0.000853417		RP11-10E6.1	-1.74597	0.0057588
	H2BFS	2.81103	0.000858361		OR7E13P	-1.74597	0.0057588
	PCP4L1	2.43199	0.000865635		RUNDC3B	-1.60932	0.00577732
	TMEM198	1.51626	0.000871446		CCDC158	-1.94393	0.00579164
	UTF1	1.94066	0.000874055		MYO9A	-1.71636	0.00582552
	RP11-401L13.4	2.97881	0.000878262		MRPS17P1	-1.72029	0.00582879
	CHRNA6	2.97881	0.000878262		FFAR2	-2.34265	0.00583444
	LMCD1	1.60442	0.00087839		UBE2Q2P2	-1.71262	0.0058404
	SHD	1.70238	0.00087953		SPACA4	-1.82609	0.00584174
	SNRPEP2	2.7013	0.000883919		RPL4P3	-1.81122	0.00587101
	LY6K	2.24487	0.000894434		ADH1A	-2.2613	0.00587938
	CSGALNACT1	2.16787	0.000901234		IGSF6	-1.77607	0.00588216
	PCDHGB4	2.21141	0.000902726		AS3MT	-1.65005	0.00595019
	CDKN2A	2.01429	0.000912713		CTC-459F4.6	-1.7459	0.00595859
	DLX2	2.69857	0.000917241		MAGEA10	-2.37831	0.00597403
	CYP24A1	3.11506	0.00092		RP11-455G16.1	-1.95779	0.0060134
	NUTM1	2.47063	0.000920113		LRRC66	-2.37982	0.00602428
	HCLS1	2.84186	0.000923762		DICER1	-1.5354	0.00607454
	TSHZ3	2.82693	0.00093134		RP11-619A10.1	-2.08295	0.00615478
	FUT3	1.90356	0.000931632		ARSK	-1.70567	0.00616908
	IGKV3-20	5.1786	0.000931933		KIAA0895	-1.71676	0.00617083
	TLR4	1.77525	0.000935995		LEKR1	-2.65414	0.00619307
	DADB-127H9.10	4.48048	0.000937685		EIF3EP2	-1.58962	0.00620442
	MMP23A	5.43963	0.000939784		RP11-974F13.5	-2.29657	0.00620882
	VWA2	2.69259	0.000950851		RPL41P2	-1.99368	0.00626065
	GSC2	3.68528	0.000952341		SENP7	-1.77246	0.00628155
	INSM1	1.55301	0.000955324		RP11-497H16.7	-3.17962	0.0062873
	NEK2P4	2.87299	0.000962241		CASC5	-1.6705	0.00631198
	TYW1B	1.50039	0.000964761		RP11-23J9.6	-1.84105	0.00631355
	AQP9	3.84265	0.000965877		GAPDHP66	-1.76269	0.00635048
	LMNA	1.81412	0.000970554		AC097374.2	-2.1415	0.00639643
	GS1-44D20.1	2.94721	0.000974804		NRGN	-1.85501	0.00650988
	DCDC2	1.87402	0.000977919		PCDH17	-1.55967	0.00662906
	RP11-297L17.6	2.69802	0.000980933		S1PR1	-1.51363	0.00665065
	RP11-574M7.2	2.69802	0.000980933		SNX18P12	-1.64953	0.00666491
	RP11-959F10.5	2.69802	0.000980933		E2F3P2	-1.64953	0.00666491
	AKR1B1P2	2.69802	0.000980933		CYP3A4	-1.64953	0.00666491
	PPIAP2	2.69802	0.000980933		CTXN3	-1.64953	0.00666491
	IL20	2.69802	0.000980933		LRRC39	-1.74876	0.00666754
	IGHV6-1	2.69802	0.000980933		DNAH6	-2.81447	0.00668283
	RPL31P12	2.69802	0.000980933		CBX3P2	-1.51745	0.00668634
	CHRNB3	2.69802	0.000980933		NEUROD1	-1.5082	0.00669893
	RPS16P9	2.69802	0.000980933		PPP1R9A	-1.58473	0.00672189
	PSPHP1	2.69802	0.000980933		GPR20	-1.79979	0.00672841
	CTD-3214H19.12	2.69802	0.000980933		POU6F2	-1.58909	0.00679751
	HSPA8P1	3.01194	0.000990317		GOLGA8J	-2.23976	0.00685986
	MTCO3P12	2.79666	0.00100816		HTR2A	-2.01404	0.00687587
	GJB4	2.66418	0.00101185		AGBL1	-2.52733	0.00688552
	PCDH1	1.64301	0.0010164		UNC5C	-1.95551	0.00690381
	VWFP1	3.39518	0.0010177		EIF4BP6	-2.00132	0.00697684
	SIT1	2.33011	0.00102311		PPP1R3G	-1.9839	0.00698433
	SQSTM1	1.70053	0.00102581		EFCAB12	-1.60516	0.00700866
	BAK1P1	2.86308	0.00103095		USP29	-1.52922	0.00701758
	CHD5	2.19107	0.0010326		ZNF705G	-2.05614	0.00703895
	SMIM5	2.85938	0.00103342		KLRF2	-1.84977	0.00704694
	PLA2G16	1.89898	0.00103433		SEL1L2	-1.91232	0.00710878
	RP11-417L14.1	3.38467	0.00103604		RAB28P5	-2.77579	0.00711053
	GALNT5	1.97784	0.00103716		RLF	-1.6243	0.00714616
	HMX3	3.66261	0.0010373		ZFYVE16	-1.70752	0.00716921
	COL6A3	4.24345	0.00103998		C14orf105	-1.84021	0.00719357
	PYDC1	2.67348	0.00104072		RP5-966M1.6	-1.72892	0.00736111
	CYP26B1	2.7364	0.00104131		RHEBP2	-3.19421	0.00736597
	RP11-321A17.3	2.69858	0.00104562		GMNC	-1.83111	0.00736649
	FAM9A	2.69858	0.00104562		HOXB13	-1.5796	0.00738222
	PA2G4P4	2.69858	0.00104562		MPHOSPH9	-1.54898	0.00738598
	HTR1A	3.25972	0.00104652		ANKRD37	-1.81557	0.00739168
	PKD2L1	2.89931	0.00104824		ABCB10P4	-1.82446	0.00741756
	TRAV18	2.13508	0.00104921		LRRC4C	-1.74346	0.00743403
	RPS2P32	2.6849	0.00105033		MLANA	-2.08165	0.00745892
	PTAFR	1.77771	0.00105151		CTB-52I2.4	-1.63339	0.00746303
	CLEC4GP1	3.95424	0.00105598		ULK4P3	-3.19754	0.0074896
	GSTT2B	1.70489	0.00105717		RP11-629F19.1	-1.68188	0.00749013
	HOXB5	3.48295	0.00106426		IGLV5-52	-1.63831	0.00749437
	SPATS1	3.48295	0.00106426		PLCXD2	-1.63864	0.00750443
	CNTD2	2.95994	0.00106581		CTD-2010I16.1	-1.86719	0.00753797
	FOSL2	1.71992	0.00106701		TRBV26OR9-2	-1.89269	0.00756962
	NPM1P27	2.26492	0.00107873		VN1R46P	-1.65645	0.00757231
	OAS1	2.12359	0.00108181		SMIM17	-2.35143	0.00758465
	ID1	1.71748	0.00108755		TAS2R31	-2.54763	0.00762738
	PLPPR4	2.54237	0.00108758		FABP2	-1.59385	0.00762823
	CPNE9	1.61003	0.00108921		RP11-99A14.1	-1.78037	0.00767026
	FBLN5	1.83153	0.00108942		ROCK1P1	-1.92216	0.00772518
	TDRD9	3.60495	0.00109034		AC092881.1	-2.85775	0.00773592
	ATP8B1	1.98454	0.00109574		ERICH2	-1.88848	0.0077611
	KCNK7	3.12068	0.00109671		SLC35F1	-1.7358	0.00777369
	HAPLN3	1.69055	0.00109761		LRRC9	-1.71949	0.00780014
	THBS1	2.85218	0.00109796		GGNBP1	-1.58639	0.00781553
	ERVV-1	3.22613	0.00110087		TAGAP	-2.0083	0.00785328
	OR5H5P	3.22613	0.00110087		SEPSECS	-1.54929	0.00789183
	ARID5A	1.68316	0.00110173		RSPO3	-1.76416	0.00789239
	RFTN1	1.7309	0.00110561		ISCA2P1	-2.34506	0.00790992
	SERPINB2	7.3111	0.00110774		GGACT	-1.59455	0.00793374
	RP11-73B8.1	2.4549	0.00110927		RNASEK-C17orf49	-3.1952	0.00797845
	NANOGNBP3	2.4549	0.00110927		LYG1	-1.97814	0.00805975
	RPLP2P1	2.4549	0.00110927		HOXA2	-3.09223	0.0080836
	AC093107.7	2.4549	0.00110927		DNAJC19P9	-1.70556	0.00809468
	KCNC3	1.86046	0.00111156		RP1-85D24.1	-1.70556	0.00809468
	FBLIM1	1.96093	0.00111169		CCDC144NL	-1.64509	0.00811252
	NOD2	3.19339	0.00111274		RP11-402K9.1	-2.13495	0.00812043
	IFI44	3.95415	0.00111588		RP11-446E9.1	-1.55407	0.00814378
	RPSAP6	2.94661	0.00112778		PCDHB19P	-1.55407	0.00814378
	PCDHA13	2.46527	0.00113708		ZNF658B	-2.3226	0.00819011
	ACTC1	2.06325	0.00113771		TOP3BP1	-2.77237	0.00820376
	RP11-1379J22.7	2.62427	0.00114		UHRF2	-1.59821	0.00821538
	SEZ6	2.32943	0.00114692		LGMNP1	-2.23268	0.00823843
	SEC14L4	2.25446	0.00114795		PRG4	-2.347	0.00825208
	ACKR2	1.73585	0.00115102		PLIN1	-2.00316	0.00826591
	DNMT3B	1.72995	0.00115964		SUGT1P3	-1.52601	0.00829241
	CXCL2	2.48859	0.00116028		AC060834.2	-1.76197	0.0083402
	ERF	1.56941	0.00116672		RP11-385D13.1	-1.77431	0.00834565
	SUB1P2	3.11133	0.00116737		UPF3AP1	-2.0322	0.00836332
	LAMA2	1.84459	0.00117157		CCDC88A	-1.61193	0.00836884
	KLHL38	3.15119	0.00119039		IL9R	-1.58804	0.00839087
	ABTB2	1.94915	0.0011931		VENTXP4	-1.96044	0.00842719
	ZNF568	1.72626	0.00119568		CNN2P4	-2.7936	0.00845513
	RPL3P12	2.41514	0.0012032		SLC36A4	-1.50322	0.00858506
	ATOH1	3.42531	0.00120481		GARNL3	-1.54317	0.00859812
	RPSAP4	2.1813	0.00120514		TCP10	-1.78746	0.00865234
	ANKRD34B	2.47888	0.00121221		SPATA1	-1.62228	0.00871736
	NPHS1	2.09225	0.00121678		CYP3A5	-1.55913	0.00873245
	RTN3P1	2.69859	0.00122377		RANP1	-1.61322	0.00873917
	VSIG8	2.69859	0.00122377		PRAME	-1.61004	0.00876665
	RP11-578F21.10	2.69859	0.00122377		SALL4P1	-1.62513	0.00879426
	GOLT1A	1.83116	0.00122903		BBX	-1.76088	0.00881952
	FBXO32	1.68106	0.00123417		AK4P3	-1.70537	0.00887092
	ITPKC	1.52515	0.00123628		DNAH12	-2.51128	0.00889752
	OSR2	4.05062	0.0012379		RGSL1	-2.03669	0.00889791
	INHBA	3.22167	0.00124215		HIST2H4B	-1.53556	0.0089011
	LIMS2	1.82946	0.0012571		FCRL1	-2.22853	0.0089389
	RPL29P19	2.59343	0.00126378		PIK3CG	-1.97242	0.00902127
	CTD-2575K13.6	2.59343	0.00126378		SLC9C1	-1.94572	0.00905043
	RNF225	2.98368	0.00126582		CTD-3092A11.1	-2.40418	0.00906743
	RAX	2.16298	0.00126904		CEP295	-1.60758	0.00910656
	FGF19	2.84514	0.00127077		AC005752.10	-1.9059	0.00911715
	CFTR	1.53869	0.00127148		PRKAA2	-1.51073	0.00913185
	CALCA	2.10121	0.00128384		DCLK2	-1.90728	0.00918859
	ADAMTS16	1.51336	0.00129409		SPDYE15P	-2.28632	0.00921302
	KRT8P36	2.09287	0.00130856		PXDNL	-1.60629	0.00921689
	FAR2P2	2.39037	0.00131369		ABCA9	-1.86085	0.00923403
	IGSF21	1.62541	0.00131921		ZNF806	-1.88783	0.00925979
	GPR87	3.73586	0.00132213		PRSS2	-2.41759	0.00927888
	SOX8	1.59881	0.00133542		ZNF624	-1.94302	0.00928318
	NPIPB7	4.10374	0.0013361		MARCKSL1P2	-1.91389	0.00931668
	PROKR2	2.4557	0.00134632		SCN7A	-1.73358	0.00932628
	GJB2	3.84393	0.00134865		OTOF	-2.01291	0.00936707
	CDC42EP5	2.13528	0.00134962		RPL7AP26	-1.5287	0.00938859
	RPSAP54	2.23473	0.00135813		HIST1H2APS4	-2.1591	0.00939224
	DUSP2	2.58357	0.00136099		PF4	-1.88181	0.00947688
	RP11-570G20.1	3.91078	0.00136186		ANKUB1	-1.81124	0.00952357
	AOAH	3.69958	0.0013637		KIF27	-2.19338	0.00955352
	BNIP3P10	2.69643	0.00136453		UBE2Q2P1	-2.56304	0.00961256
	BNIP3P22	2.69643	0.00136453		DST	-1.5071	0.00966063
	C1QB	2.69643	0.00136453		RP11-211G3.2	-2.75377	0.00972999
	TRIML1	2.69643	0.00136453		MMP13	-2.03872	0.00973931
	CST9	2.69643	0.00136453		RP5-966M1.7	-1.50032	0.00974788
	AC005795.1	2.69643	0.00136453		RPL36AP15	-1.76746	0.0097487
	HMGB1P20	2.69643	0.00136453		SLC23A1	-1.7006	0.00975002
	KRT24	2.69643	0.00136453		CCDC144B	-1.55559	0.00976291
	RP11-709A23.2	2.69643	0.00136453		GDF9	-1.79882	0.00979021
	MRGPRE	2.69643	0.00136453		RP11-460N20.7	-1.54943	0.00988201
	RP1-139D8.6	2.69643	0.00136453		SLTM	-1.52385	0.00997517
	RP11-151F5.2	2.69643	0.00136453		CTSLP2	-2.41875	0.00998481
	NODAL	3.49213	0.00137234		NRG2	-1.95513	0.00998909
	EMX1	2.80925	0.00138128		NUP58P1	-1.58484	0.0100384
	GUSBP5	2.6396	0.00138304		FAM153B	-1.55864	0.0100651
	FUT2	1.50517	0.00139103		NOX5	-1.50882	0.0100671
	HNRNPA1P66	1.92198	0.00139299		CEP126	-2.01478	0.01008
	PLA2G10	2.92939	0.00139672		HAMP	-2.17242	0.0100804
	NPY	5.03931	0.00140233		CHRM2	-2.00604	0.0101132
	RP1-140J1.4	2.70256	0.00140423		RPL14P1	-1.65338	0.0101975
	PLA2G2F	2.70256	0.00140423		RP11-403I13.4	-1.74574	0.0102197
	ACTBP9	3.32314	0.00141617		FAM106A	-2.18376	0.0102542
	RPS3AP12	3.22915	0.00141986		TRGV3	-1.7341	0.0102581
	PRNP	1.62328	0.00142532		TRIM26BP	-2.20087	0.0102991
	SLAMF9	3.825	0.00143809		RP11-386I23.1	-1.81318	0.0103518
	SENP3-EIF4A1	2.42313	0.00144048		AKR1D1	-1.867	0.0103747
	RP11-163O19.8	2.85694	0.00145714		CLLU1	-2.1934	0.0104148
	PARP4P2	2.85694	0.00145714		TMPRSS11BNL	-1.90139	0.0104198
	GC	2.85694	0.00145714		MESP2	-1.65428	0.0104226
	AC011330.5	4.43895	0.00148081		FCN1	-2.76484	0.0104264
	RP11-57C19.2	2.85827	0.00150304		AC008810.1	-2.59899	0.010537
	COL5A2	1.87616	0.00150407		AL135745.1	-2.59899	0.010537
	DHRS3	1.62345	0.00150735		OCLM	-1.89954	0.0105648
	ACTG1P19	2.26171	0.00151727		SRGAP2D	-4.70464	0.0105875
	SPCS2P4	1.56711	0.00153437		KCNA4	-2.19841	0.010603
	DUSP8	1.72817	0.00153616		RPL23AP28	-1.72868	0.010627
	RP11-351I24.3	4.39569	0.00153869		RP11-428G5.7	-1.71417	0.0106417
	FAM83E	2.1558	0.00154413		GRK1	-2.04579	0.0107572
	ADAP1	1.55282	0.00154451		HNF4A	-1.85843	0.010784
	PXDC1	2.37493	0.00156163		RGPD6	-2.32595	0.0108607
	ENG	1.77535	0.00157561		APLF	-1.71571	0.0108946
	IGHM	2.86055	0.00157907		MRGPRX3	-1.66189	0.0109245
	HLA-DQA2	2.86055	0.00157907		GUSBP4	-1.60734	0.0109288
	IGLV3-25	2.86055	0.00157907		PLA2G4E	-1.69811	0.0109327
	KAAG1	2.86055	0.00157907		CD164L2	-1.54885	0.0110284
	RHOD	1.66577	0.00157999		RP11-6L6.2	-1.94097	0.0110699
	MT-ATP6	2.27807	0.00159885		RP11-325P15.1	-1.54498	0.0111196
	CA10	1.91025	0.00160488		LGALS17A	-1.54498	0.0111196
	AC027612.6	1.82206	0.00160911		CDHR4	-1.64503	0.0111222
	SLC6A2	2.04959	0.00161068		PLEKHH2	-1.67538	0.0111246
	IGFBP6	1.62341	0.0016118		KCNC1	-1.7852	0.0111682
	ULBP2	3.73927	0.00161287		ATP1B4	-1.80885	0.0112028
	TYMP	1.7264	0.00161487		CSRNP3	-1.94168	0.0112878
	PCDHGA12	2.19535	0.00161942		EML6	-2.20936	0.0113003
	RPL10AP2	1.97211	0.00162041		SLC25A14P1	-1.58472	0.0113106
	PLD6	1.63146	0.00162956		ZNF25	-1.69326	0.0114069
	MFAP4	1.84092	0.00163091		POTEI	-1.58891	0.0114635
	EIF4A1P2	2.07105	0.00163264		PROZ	-1.57307	0.0114673
	IFITM5	2.60972	0.00163866		ACRC	-1.56914	0.0114849
	CPN1	1.92095	0.00164113		RAP2CP1	-1.87136	0.0114892
	LRG1	2.23101	0.00164405		ADAMTS7P1	-2.66539	0.0114917
	RPS6P12	3.58793	0.00166885		TAL2	-1.92472	0.0114917
	GAB3	2.00394	0.00169204		PDE1B	-1.94078	0.0115414
	ARHGEF16	1.58905	0.00169415		FRA10AC1	-1.5844	0.0115659
	ADTRP	2.02534	0.00170102		RRN3P2	-1.65068	0.0116379
	RP11-728K20.1	4.72114	0.00170538		KLRA1P	-2.34864	0.0116658
	PLAC1	2.24846	0.00172032		ZNF285	-1.71152	0.011759
	FOXL1	1.6179	0.00172983		PPEF2	-2.4357	0.0118514
	PID1	1.5303	0.00175351		HIST1H1E	-2.75178	0.0119198
	ACTG1P21	2.17237	0.00175749		F10	-1.59203	0.0119989
	TNFRSF4	3.79221	0.00176861		SIRT4	-1.54747	0.0120367
	AL592183.1	2.71384	0.00177244		RP11-77K12.5	-2.58206	0.0120379
	XXbac-BPG248L24.12	2.51224	0.0017833		KRT18P7	-1.72701	0.0120845
	RXFP1	2.17261	0.00178566		CLEC2B	-2.1044	0.0121118
	CXorf49	3.87743	0.00181003		VPS13C	-1.92522	0.0121712
	CXorf49B	3.87743	0.00181003		RP1-159M24.1	-1.84373	0.0121875
	VPS18	1.61466	0.00182045		AC073065.3	-1.6033	0.0122042
	MTCO1P2	2.25811	0.00182457		DUSP19	-2.14721	0.0122343
	CD19	2.22174	0.00182674		GOLGA8K	-2.21698	0.0122413
	BATF	3.41203	0.00183184		INTS4P1	-2.24207	0.0122606
	ZNF841	1.50576	0.00183262		KCNE1	-1.97842	0.0122627
	NNMT	2.93256	0.00183811		SAG	-1.79761	0.0123211
	ALOX15	2.00212	0.00185082		ALDH8A1	-2.05834	0.0123934
	SLC37A1	1.56786	0.00185133		TRAM1L1	-1.82244	0.0124749
	ACTBP2	2.21906	0.00185355		GUCY2D	-2.50817	0.0125141
	TMEM38A	1.53885	0.00186626		GOT2P3	-1.51972	0.0125708
	HSPB8	1.91622	0.00186818		KIF21A	-1.61175	0.0125855
	RPS7P10	2.30717	0.00187042		LRRFIP1P1	-2.77901	0.0127209
	RPL7P17	2.45177	0.00187327		MMRN1	-4.09614	0.0128052
	HMGN2P41	2.45177	0.00187327		SUPT20HL2	-1.76674	0.0128388
	IMMP1LP1	2.45177	0.00187327		CNTNAP4	-2.89503	0.0128724
	KRT18P40	2.45177	0.00187327		RP11-551L14.8	-2.08418	0.0128819
	MED15P8	2.45177	0.00187327		ZNF404	-1.5543	0.012909
	NDUFB4P6	2.45177	0.00187327		CFL1P1	-2.053	0.0129331
	PFN3	2.45177	0.00187327		FSIP2	-2.69863	0.0130301
	RPS4Y2	2.45177	0.00187327		C5orf42	-1.92712	0.0130478
	RP1-228H13.2	2.45177	0.00187327		C4orf51	-1.66421	0.0130901
	RP11-14I17.1	2.45177	0.00187327		RP1-76C18.1	-1.76738	0.0131367
	RP11-162A23.5	2.45177	0.00187327		LDHC	-1.52061	0.0131561
	TCEA1P3	2.45177	0.00187327		CRYBB2	-2.11618	0.0131597
	RP11-270C12.3	2.45177	0.00187327		KLKP1	-1.82044	0.0131943
	RP11-462H3.2	2.45177	0.00187327		DDIT4	-1.81508	0.0132428
	RP11-767C4.1	2.45177	0.00187327		DNASE1L3	-1.8325	0.0132488
	RP11-84H6.1	2.45177	0.00187327		TMEM56-RWDD3	-1.68469	0.0132658
	RPL7AP57	2.45177	0.00187327		CEACAM5	-1.50272	0.0132672
	DUX4L51	2.45177	0.00187327		NEK10	-1.65843	0.0133957
	CSAG1	2.45177	0.00187327		WDR93	-2.61384	0.0134934
	AC005477.1	2.45177	0.00187327		KCTD19	-2.31072	0.0135084
	ADAM18	2.45177	0.00187327		PPEF1	-1.85232	0.0135717
	CSDAP1	2.45177	0.00187327		AC005943.2	-4.12619	0.0135855
	BNIP3P39	2.45177	0.00187327		HNRNPLP2	-1.90511	0.013618
	CCR9	2.45177	0.00187327		RP11-824M15.3	-1.74227	0.0136247
	COL8A2	1.62774	0.00188316		TNNI2	-1.8108	0.01382
	NKX2-4	3.22447	0.00189101		TTLL7	-1.88598	0.0139175
	TBX5	2.70195	0.00189261		RP11-295P9.13	-2.0525	0.0139796
	MTCO3P29	2.70195	0.00189261		ANO5	-1.53707	0.0140946
	ABCA4	2.31453	0.00191209		AP000350.10	-3.12302	0.0141887
	C7orf57	2.38866	0.00191507		AC016712.1	-1.75175	0.0142164
	CYS1	1.8669	0.00191642		AMPH	-1.67188	0.0143198
	VDR	2.00996	0.00193482		POU5F2	-2.68693	0.0143229
	MYOZ1	1.80736	0.00193815		C12orf42	-1.70264	0.0143792
	KLF2P2	2.9424	0.00194504		GOLGA6L22	-2.58727	0.014387
	RP11-151H2.3	2.9424	0.00194504		NWD2	-2.43681	0.0144407
	CTC-325H20.7	3.07192	0.00194858		LDHAP7	-2.55183	0.0148817
	IL1RN	3.39689	0.00195249		RP11-38C17.1	-1.76705	0.0149641
	XG	2.43363	0.00195561		ZNF280A	-1.75534	0.0149686
	TMEM265	2.30675	0.00197055		FAM208A	-1.52762	0.0149693
	HMGB2P1	2.86416	0.00197841		BMS1P22	-1.8346	0.0150461
	COMP	2.40255	0.00198104		CTD-2369P2.10	-1.64403	0.0151968
	TPRX1	2.41772	0.00198786		SPDYE11	-1.64285	0.0152764
	FXYD3	2.12941	0.00199229		TTC6	-1.68291	0.0153773
	TMEM150B	2.04756	0.00200284		CCDC171	-1.60795	0.0154543
	DPEP1	1.60692	0.00202654		HIST2H2BC	-2.50573	0.0155017
	UROC1	2.61163	0.00203717		AXDND1	-1.92242	0.0155826
	ACTBP7	2.49488	0.00203969		NPM1P31	-1.73252	0.0156227
	FBP1	2.44701	0.00204665		ENPP7P1	-1.60304	0.0156497
	MPZ	1.63524	0.00204672		ZNF833P	-1.70998	0.0156904
	SLC5A7	2.8055	0.0020487		ARHGAP20	-1.51953	0.0157115
	MICAL2	3.20318	0.00206331		TAS2R30	-1.80516	0.0157471
	CPT1A	1.90076	0.00206707		DGKZP1	-2.03515	0.0158655
	RP11-369K17.2	1.92328	0.00208717		ATP13A5	-1.7739	0.0159151
	RP11-336N8.4	1.92328	0.00208717		ZNF602P	-1.90147	0.0159241
	RP11-114G11.3	1.92328	0.00208717		LDLRAD4	-1.97117	0.0159853
	RP11-343C2.7	1.92328	0.00208717		PRSS1	-2.42872	0.0161716
	RP11-363H12.1	1.92328	0.00208717		EMCN	-1.72666	0.0161899
	RP11-314A15.2	1.92328	0.00208717		PRLHR	-1.54021	0.0162777
	RP11-341D18.5	1.92328	0.00208717		HSPE1P3	-2.2421	0.0164371
	RP11-153M7.1	1.92328	0.00208717		GLRA3	-1.848	0.0164902
	AC104772.1	1.92328	0.00208717		ADAM1B	-1.74592	0.0165038
	RP11-297B17.2	1.92328	0.00208717		NUDT18	-1.88497	0.0165526
	RP11-37J13.1	1.92328	0.00208717		FER1L6	-2.10317	0.016585
	RP11-390F10.3	1.92328	0.00208717		SUMO4	-2.04816	0.016688
	RP11-404G16.2	1.92328	0.00208717		C14orf28	-1.53692	0.0166891
[truncated: 1,781 more rows]

## Sheet: vs H9 hESC-TesR1
	gene_symbol	logFC	P.Value		gene_symbol	logFC	P.Value
[truncated: 2,865 more rows]

[truncated: 6 more sheets: vs 3iL H1 hESC, vs 5iLFA H9 hESC, 2iL+Go HNES1 hESC, expanded hiPSC, XAV939 HNES1 hESC, H9-derived amnion]
