# Supplementary material for: The human amniotic epithelium confers a bias to differentiate toward the neuroectoderm lineage in human embryonic stem cells
Source: eLife. 2022 Jul 11;11:e68035. doi: 10.7554/eLife.68035 (PMC9313526; doi:10.7554/eLife.68035)
Supplement: Supplementary file 2. [file elife-68035-supp2.xlsx]

## Sheet: vs H1 hESC-iMEF
	p.val
hsa04390 Hippo signaling pathway	1.09973e-06
hsa04340 Hedgehog signaling pathway	1.57467e-06
hsa04512 ECM-receptor interaction	2.35316e-06
hsa04974 Protein digestion and absorption	3.68489e-05
hsa04510 Focal adhesion	0.000616709
hsa04916 Melanogenesis	0.000733633
hsa04151 PI3K-Akt signaling pathway	0.00290367
hsa04330 Notch signaling pathway	0.00483272
hsa04668 TNF signaling pathway	0.00781021
hsa04310 Wnt signaling pathway	0.0177451
hsa04350 TGF-beta signaling pathway	0.0195697
hsa04911 Insulin secretion	0.0236609

## Sheet: vs H9 hESC-TesR1
	p.val
hsa03010 Ribosome	2.11484e-08
hsa04340 Hedgehog signaling pathway	1.10751e-05
hsa04510 Focal adhesion	6.15685e-05
hsa04350 TGF-beta signaling pathway	0.000141128
hsa04390 Hippo signaling pathway	0.000225884
hsa04010 MAPK signaling pathway	0.000645284
hsa00010 Glycolysis / Gluconeogenesis	0.000797577
hsa04066 HIF-1 signaling pathway	0.000948085
hsa04512 ECM-receptor interaction	0.00118057
hsa00051 Fructose and mannose metabolism	0.00150101
hsa00480 Glutathione metabolism	0.00290607
hsa04115 p53 signaling pathway	0.00293058
hsa00030 Pentose phosphate pathway	0.0036594
hsa00360 Phenylalanine metabolism	0.00730873
hsa04540 Gap junction	0.0104457
hsa04310 Wnt signaling pathway	0.010888
hsa00190 Oxidative phosphorylation	0.0138729
hsa04144 Endocytosis	0.0186214
hsa04151 PI3K-Akt signaling pathway	0.0230441
hsa04060 Cytokine-cytokine receptor interaction	0.0240858
hsa03320 PPAR signaling pathway	0.0244224
hsa04380 Osteoclast differentiation	0.0246952
hsa04145 Phagosome	0.0252122
hsa04916 Melanogenesis	0.0278149
hsa04064 NF-kappa B signaling pathway	0.0285839
hsa00240 Pyrimidine metabolism	0.0367512
hsa00980 Metabolism of xenobiotics by cytochrome P450	0.0375859

## Sheet: vs 5iLFA H9 hESC
	p.val
hsa04080 Neuroactive ligand-receptor interaction	3.43768e-15
hsa04514 Cell adhesion molecules (CAMs)	1.32385e-13
hsa04510 Focal adhesion	5.27777e-12
hsa04512 ECM-receptor interaction	7.59078e-11
hsa04974 Protein digestion and absorption	2.03785e-10
hsa04020 Calcium signaling pathway	6.87819e-09
hsa04360 Axon guidance	3.06791e-08
hsa04724 Glutamatergic synapse	3.92669e-07
hsa04060 Cytokine-cytokine receptor interaction	9.94748e-07
hsa04727 GABAergic synapse	1.41558e-06
hsa04725 Cholinergic synapse	3.28671e-06
hsa04726 Serotonergic synapse	4.33676e-06
hsa04713 Circadian entrainment	4.55328e-06
hsa04970 Salivary secretion	5.73308e-06
hsa04151 PI3K-Akt signaling pathway	8.86229e-06
hsa04723 Retrograde endocannabinoid signaling	9.61478e-06
hsa04911 Insulin secretion	1.33263e-05
hsa04270 Vascular smooth muscle contraction	3.2967e-05
hsa04540 Gap junction	8.26679e-05
hsa04010 MAPK signaling pathway	0.000129962
hsa04672 Intestinal immune network for IgA production	0.000148883
hsa04310 Wnt signaling pathway	0.000174726
hsa04971 Gastric acid secretion	0.000212104
hsa04913 Ovarian steroidogenesis	0.000583869
hsa04640 Hematopoietic cell lineage	0.000698989
hsa04610 Complement and coagulation cascades	0.000707001
hsa04810 Regulation of actin cytoskeleton	0.000972123
hsa04972 Pancreatic secretion	0.000983376
hsa04260 Cardiac muscle contraction	0.00109247
hsa04062 Chemokine signaling pathway	0.00135194
hsa04330 Notch signaling pathway	0.00184391
hsa04728 Dopaminergic synapse	0.00601006
hsa04670 Leukocyte transendothelial migration	0.0060549
hsa04960 Aldosterone-regulated sodium reabsorption	0.00740725
hsa04916 Melanogenesis	0.00947132
hsa04530 Tight junction	0.0101909
hsa00514 Other types of O-glycan biosynthesis	0.015066
hsa04340 Hedgehog signaling pathway	0.0261707
hsa00340 Histidine metabolism	0.031261
hsa04390 Hippo signaling pathway	0.037902
hsa04064 NF-kappa B signaling pathway	0.0400042
hsa00534 Glycosaminoglycan biosynthesis - heparan sulfate / heparin	0.0411962

## Sheet: vs H9 hESC-iMEF 
	p.val
hsa04512 ECM-receptor interaction	1.3939e-10
hsa04060 Cytokine-cytokine receptor interaction	1.85708e-06
hsa04668 TNF signaling pathway	2.34401e-06
hsa04510 Focal adhesion	2.59162e-06
hsa04974 Protein digestion and absorption	2.68376e-06
hsa04151 PI3K-Akt signaling pathway	8.45751e-06
hsa04514 Cell adhesion molecules (CAMs)	2.6191e-05
hsa04640 Hematopoietic cell lineage	2.62635e-05
hsa04610 Complement and coagulation cascades	0.000195084
hsa04380 Osteoclast differentiation	0.000395865
hsa04064 NF-kappa B signaling pathway	0.000510636
hsa04670 Leukocyte transendothelial migration	0.00162852
hsa04612 Antigen processing and presentation	0.00204823
hsa00590 Arachidonic acid metabolism	0.00243769
hsa04145 Phagosome	0.00321851
hsa04080 Neuroactive ligand-receptor interaction	0.00705916
hsa04960 Aldosterone-regulated sodium reabsorption	0.00878046
hsa04672 Intestinal immune network for IgA production	0.00887104
hsa00980 Metabolism of xenobiotics by cytochrome P450	0.0106324
hsa04621 NOD-like receptor signaling pathway	0.0110956
hsa04115 p53 signaling pathway	0.014403
hsa04630 Jak-STAT signaling pathway	0.0167543
hsa00760 Nicotinate and nicotinamide metabolism	0.0213825

## Sheet: vs XAV939 HNES1 hESC
	p.val
hsa04360 Axon guidance	6.68968e-07
hsa04974 Protein digestion and absorption	0.0003183
hsa04340 Hedgehog signaling pathway	0.000404868
hsa04512 ECM-receptor interaction	0.000735574
hsa04310 Wnt signaling pathway	0.000800903
hsa04510 Focal adhesion	0.000889565
hsa04916 Melanogenesis	0.00143271
hsa04961 Endocrine and other factor-regulated calcium reabsorption	0.00277169
hsa00920 Sulfur metabolism	0.00479579
hsa04724 Glutamatergic synapse	0.00581089
hsa04390 Hippo signaling pathway	0.00606475
hsa04540 Gap junction	0.0068382
hsa04727 GABAergic synapse	0.0068382
hsa04728 Dopaminergic synapse	0.00912441
hsa04151 PI3K-Akt signaling pathway	0.0126544

## Sheet: vs 3iL H1 hESC
	p.val
hsa04514 Cell adhesion molecules (CAMs)	5.87284e-07
hsa04080 Neuroactive ligand-receptor interaction	5.98854e-07
hsa04060 Cytokine-cytokine receptor interaction	0.000116947
hsa04610 Complement and coagulation cascades	0.000297964
hsa04512 ECM-receptor interaction	0.000369134
hsa04640 Hematopoietic cell lineage	0.00112686
hsa04672 Intestinal immune network for IgA production	0.00147288
hsa04670 Leukocyte transendothelial migration	0.00164593
hsa04612 Antigen processing and presentation	0.00287496
hsa04724 Glutamatergic synapse	0.00308646
hsa04510 Focal adhesion	0.00321106
hsa04974 Protein digestion and absorption	0.0039484
hsa04310 Wnt signaling pathway	0.0048152
hsa04145 Phagosome	0.00593846
hsa04726 Serotonergic synapse	0.0061952
hsa04390 Hippo signaling pathway	0.0131582
hsa00514 Other types of O-glycan biosynthesis	0.0205211
hsa04727 GABAergic synapse	0.0236968
hsa04010 MAPK signaling pathway	0.025645
hsa00290 Valine, leucine and isoleucine biosynthesis	0.0277705
hsa04340 Hedgehog signaling pathway	0.0298322
hsa04062 Chemokine signaling pathway	0.0465187
hsa04260 Cardiac muscle contraction	0.0498538

## Sheet: vs AMIQ hESC-hAEC-CM 
	p.val
hsa04340 Hedgehog signaling pathway	2.20228e-07
hsa04916 Melanogenesis	6.1204e-05
hsa04390 Hippo signaling pathway	7.15488e-05
hsa04310 Wnt signaling pathway	0.000155053
hsa04360 Axon guidance	0.000355772
hsa04514 Cell adhesion molecules (CAMs)	0.00331742
hsa04978 Mineral absorption	0.0118914
hsa04350 TGF-beta signaling pathway	0.0128439
hsa04512 ECM-receptor interaction	0.0179371
hsa04080 Neuroactive ligand-receptor interaction	0.0218919
hsa00830 Retinol metabolism	0.0267615
hsa04020 Calcium signaling pathway	0.0382035
hsa04151 PI3K-Akt signaling pathway	0.0392876

## Sheet: vs AMIQ hESC-iMEC-CM
	p.val
hsa04512 ECM-receptor interaction	3.47521e-12
hsa04340 Hedgehog signaling pathway	8.59563e-10
hsa04510 Focal adhesion	6.87805e-09
hsa04390 Hippo signaling pathway	7.4781e-08
hsa04151 PI3K-Akt signaling pathway	1.6759e-06
hsa04310 Wnt signaling pathway	1.70165e-06
hsa04916 Melanogenesis	5.72758e-06
hsa04350 TGF-beta signaling pathway	0.000585242
hsa04974 Protein digestion and absorption	0.00103077
hsa04360 Axon guidance	0.00618758
hsa00830 Retinol metabolism	0.0101432

## Sheet: vs hAEC
	p.val
hsa03030 DNA replication	1.09129e-12
hsa04110 Cell cycle	8.23085e-08
hsa03040 Spliceosome	4.02857e-07
hsa03430 Mismatch repair	2.45135e-06
hsa00260 Glycine, serine and threonine metabolism	6.65647e-05
hsa00250 Alanine, aspartate and glutamate metabolism	0.000113597
hsa03013 RNA transport	0.000156689
hsa04724 Glutamatergic synapse	0.000220805
hsa00270 Cysteine and methionine metabolism	0.000394608
hsa04713 Circadian entrainment	0.000499629
hsa00330 Arginine and proline metabolism	0.000745673
hsa00910 Nitrogen metabolism	0.00231294
hsa04725 Cholinergic synapse	0.00235428
hsa03410 Base excision repair	0.0023742
hsa04010 MAPK signaling pathway	0.00263734
hsa04728 Dopaminergic synapse	0.00311324
hsa00010 Glycolysis / Gluconeogenesis	0.00346966
hsa03008 Ribosome biogenesis in eukaryotes	0.00389345
hsa04310 Wnt signaling pathway	0.00400327
hsa03440 Homologous recombination	0.00434978
hsa00630 Glyoxylate and dicarboxylate metabolism	0.00434978
hsa03018 RNA degradation	0.00545515
hsa00620 Pyruvate metabolism	0.0068223
hsa04971 Gastric acid secretion	0.00781447
hsa04964 Proximal tubule bicarbonate reclamation	0.00802334
hsa04390 Hippo signaling pathway	0.00826988
hsa04910 Insulin signaling pathway	0.012003
hsa00970 Aminoacyl-tRNA biosynthesis	0.0132453
hsa04020 Calcium signaling pathway	0.0135348
hsa03420 Nucleotide excision repair	0.0148514
hsa00750 Vitamin B6 metabolism	0.0161279
hsa04726 Serotonergic synapse	0.0169842
hsa00380 Tryptophan metabolism	0.0170893
hsa04540 Gap junction	0.0200472
hsa04723 Retrograde endocannabinoid signaling	0.0211722
hsa04911 Insulin secretion	0.0236784
hsa00670 One carbon pool by folate	0.0296812
hsa00230 Purine metabolism	0.0303545
hsa04914 Progesterone-mediated oocyte maturation	0.0311096
hsa04960 Aldosterone-regulated sodium reabsorption	0.0317798
hsa00280 Valine, leucine and isoleucine degradation	0.0324455
hsa04918 Thyroid hormone synthesis	0.0348834
hsa04727 GABAergic synapse	0.0354308
hsa00310 Lysine degradation	0.038517
hsa04961 Endocrine and other factor-regulated calcium reabsorption	0.0388717

## Sheet: vs 2iL+Go HNES hESC 
	p.val
hsa04510 Focal adhesion	1.75916e-08
hsa04514 Cell adhesion molecules (CAMs)	5.13498e-08
hsa04360 Axon guidance	1.07019e-06
hsa04974 Protein digestion and absorption	2.42146e-06
hsa04512 ECM-receptor interaction	3.97383e-06
hsa04724 Glutamatergic synapse	1.65371e-05
hsa04151 PI3K-Akt signaling pathway	1.89614e-05
hsa04726 Serotonergic synapse	6.26508e-05
hsa04725 Cholinergic synapse	0.000118939
hsa04670 Leukocyte transendothelial migration	0.000176825
hsa04810 Regulation of actin cytoskeleton	0.000457534
hsa04713 Circadian entrainment	0.000645802
hsa04727 GABAergic synapse	0.000810505
hsa04672 Intestinal immune network for IgA production	0.000989844
hsa04080 Neuroactive ligand-receptor interaction	0.000991652
hsa04911 Insulin secretion	0.00100481
hsa04960 Aldosterone-regulated sodium reabsorption	0.00244675
hsa04530 Tight junction	0.00250005
hsa04728 Dopaminergic synapse	0.00278932
hsa04916 Melanogenesis	0.00339148
hsa04540 Gap junction	0.00384232
hsa04010 MAPK signaling pathway	0.00397402
hsa04970 Salivary secretion	0.00455598
hsa04310 Wnt signaling pathway	0.00594794
hsa00514 Other types of O-glycan biosynthesis	0.00612628
hsa04971 Gastric acid secretion	0.00633372
hsa04330 Notch signaling pathway	0.009056
hsa04961 Endocrine and other factor-regulated calcium reabsorption	0.009056
hsa04270 Vascular smooth muscle contraction	0.00922286
hsa04012 ErbB signaling pathway	0.0111511
hsa04062 Chemokine signaling pathway	0.0124923
hsa04060 Cytokine-cytokine receptor interaction	0.0135019
hsa04020 Calcium signaling pathway	0.0143071
hsa04723 Retrograde endocannabinoid signaling	0.0143378
hsa00340 Histidine metabolism	0.015662
hsa04918 Thyroid hormone synthesis	0.0160739
hsa00512 Mucin type O-Glycan biosynthesis	0.017516
hsa04390 Hippo signaling pathway	0.0175857
hsa04612 Antigen processing and presentation	0.0177787
hsa04913 Ovarian steroidogenesis	0.0357068
hsa04972 Pancreatic secretion	0.0369911
hsa04666 Fc gamma R-mediated phagocytosis	0.0396496
hsa04340 Hedgehog signaling pathway	0.0419913

[truncated: 3 more sheets: vs AMIQ hESC-iMEF, vs expanded hiPSC, vs H9-derived amnion]
