# Supplementary material for: The human amniotic epithelium confers a bias to differentiate toward the neuroectoderm lineage in human embryonic stem cells
Source: eLife. 2022 Jul 11;11:e68035. doi: 10.7554/eLife.68035 (PMC9313526; doi:10.7554/eLife.68035)
Supplement: Supplementary file 3. [file elife-68035-supp3.xlsx]

## Sheet: Hoja1
UP in AMIQ hESC-hAEC vs:	AMIQ hESC-iMEF			H1 hESC-iMEF			AMIQ hESC-iMEF-CM			AMIQ hESC-hAEC-CM			hAEC			H9 hESC-iMEF			H9 hESC-TesR1			3iL H1 hESC			5iLFA H9 hESC			2iL+Go HNES1 hESC			expanded hiPSC			XAV939 HNES1 hESC			H9-derived amnion
	logFC	P.Value		logFC	P.Value		logFC	P.Value		logFC	P.Value		logFC	P.Value		logFC	P.Value		logFC	P.Value		logFC	P.Value		logFC	P.Value		logFC	P.Value		logFC	P.Value		logFC	P.Value		logFC	P.Value
TGM2	3.44078	0.000306387		3.82436	2.82725e-06		3.75699	1.80826e-06		-1.57004	0.00466029		-5.22746	5.85902e-07		4.45487	2.21212e-07		4.27593	2.61119e-07		3.20092	9.65674e-06		5.36274	1.24473e-07		3.01484	9.02433e-06		4.43384	1.55529e-07		4.62022	1.8727e-06		3.4379	3.4988e-06
CLIC3	4.09778	0.000963576		3.18115	0.00141718		3.68469	0.000100564		4.74421	5.08481e-05		-5.09053	3.36433e-06		7.23495	9.4921e-07		6.64269	2.90839e-07		7.86149	2.22053e-06		4.44914	3.56009e-06		4.27568	7.99559e-06		5.15699	3.8396e-06		4.58181	1.6335e-05		3.32186	0.000100923
GBP2	3.73186	9.25601e-05		1.94126	0.0137726		3.39718	4.43979e-05		-0.102384	0.861785		-3.67257	4.55729e-05		5.7852	4.3104e-06		6.54496	2.11164e-07		4.52465	0.00028392		5.62812	7.58156e-07		3.76247	7.85233e-06		4.9719	7.61055e-06		4.19194	3.92556e-05		4.87218	3.45472e-06
IGFBP3	3.38073	2.3752e-06		3.29414	3.88139e-06		3.88147	1.73754e-07		0.999338	0.0310304		-4.90632	5.75002e-06		4.69614	3.08779e-08		2.93638	1.78296e-06		3.51333	1.26174e-06		6.06048	1.3179e-08		2.72221	2.20609e-06		3.22266	4.15309e-06		4.01388	3.66208e-07		-2.94813	4.82286e-05
KCNN4	2.3137	0.000381203		2.18559	0.00218116		2.09543	0.0046858		-0.648695	0.287096		-3.90799	6.02496e-06		5.71335	4.04113e-07		3.0404	7.4376e-05		3.93556	0.000428535		4.85257	4.88916e-06		4.1096	2.65271e-05		4.97995	3.87632e-06		2.42787	0.000441088		3.47717	3.13676e-05
KRT7	2.32617	0.00591282		3.17989	2.90981e-05		2.33216	0.000942523		3.11531	0.000860194		-3.69205	0.000733417		3.48806	2.86715e-05		2.21749	0.00053064		4.76232	1.55848e-05		7.62035	1.50531e-07		5.14613	1.36545e-06		4.80108	1.88726e-05		4.21125	1.52943e-05		1.11896	0.0432115
RBBP8NL	3.60739	0.00585502		2.63117	0.00702929		3.30766	0.00148684		0.55728	0.515592		-3.48087	0.000298739		6.32235	9.55889e-05		1.54024	0.0420736		5.13186	0.0005613		7.09563	2.707e-06		4.22568	0.000313657		6.51346	2.25324e-06		4.25648	0.00210252		-1.5186	0.0251147
VTCN1	4.72126	0.00108988		5.05625	5.59001e-06		5.80485	5.73e-07		6.4565	3.38391e-06		-6.29488	7.93625e-08		5.07743	5.31806e-06		4.02446	4.84813e-06		6.00083	7.14916e-07		6.54291	1.0465e-06		4.15301	1.23135e-05		5.41214	3.72738e-07		6.17299	3.41781e-06		-1.46878	0.0144561
WNT6	5.87259	6.93698e-05		6.66015	3.48358e-06		6.34182	5.31369e-06		4.86526	0.00339327		-4.25393	3.16487e-06		7.32529	1.36723e-05		6.84945	1.3651e-05		4.30258	2.66928e-05		4.07585	1.18224e-05		4.96745	8.08592e-06		3.23708	2.43845e-05		6.61545	3.28241e-05		-2.2748	0.000462968
C1orf21	2.24363	7.13656e-07		2.20978	2.33108e-06		1.91958	1.6243e-05		-0.655264	0.190244		1.46053	0.0113547		5.42404	1.72153e-06		0.789855	0.00324719		2.24656	3.08836e-06		7.88804	1.10502e-09		5.67321	2.8725e-09		7.3154	2.89616e-06		4.18726	3.88415e-07		1.7788	6.91613e-05
CERCAM	2.68894	0.000115451		2.74937	1.0541e-05		3.34446	2.07571e-06		-0.682012	0.119125		-4.83406	1.15979e-07		1.70229	0.000252907		3.49532	8.42411e-07		3.16053	1.13869e-05		1.60952	0.000332704		1.45547	0.000745763		2.86112	4.90377e-05		3.88228	1.25491e-06		0.202044	0.582143
KANK4	3.51237	0.000212121		4.76197	4.27379e-07		4.9366	1.29954e-06		2.93624	0.000172745		-4.83406	1.15979e-07		4.78702	8.21385e-07		3.42519	8.04218e-06		3.66736	2.29691e-06		1.33844	0.00190214		1.18903	0.00382614		4.87067	4.58761e-06		3.02015	8.55059e-06		-0.250216	0.564363
ODAM	4.09677	3.59179e-05		4.17818	5.23828e-05											5.32688	5.90529e-06		4.8618	7.67173e-06		3.23419	0.00749309		5.08905	9.15536e-06		3.7724	0.000305924		3.02789	0.00109756					1.12734	0.0875837
DSC3	2.28097	0.000160864		3.6268	1.69485e-06		2.19619	0.000176466		0.889314	0.0462623		-5.13153	8.43931e-09		3.02858	3.49848e-05		0.222036	0.390119		1.39919	0.000472772		4.14027	3.8357e-07		1.22422	0.00153617		3.51512	1.23709e-06		1.5266	0.000369483		2.00885	0.00021085
