# Supplementary material for: The human amniotic epithelium confers a bias to differentiate toward the neuroectoderm lineage in human embryonic stem cells
Source: eLife. 2022 Jul 11;11:e68035. doi: 10.7554/eLife.68035 (PMC9313526; doi:10.7554/eLife.68035)
Supplement: Supplementary file 4. [file elife-68035-supp4.xlsx]

## Sheet: vs 3iL H1 hESC 
term_name	zscore	combined_score	FDR	pvalue	overlapping_genes	gene_set_library	geneset
ESRRB_human_tf_ARCHS4_coexpression	-2.02809	309.986	6.09885e-64	4.16588e-67	['ATP5G2P1', 'CTD-2122P11.1', 'RPL10L', 'ATP5BP1', 'AF131215.1', 'RP11-305L7.5', 'HSP90AB6P', 'CTC-398G3.2', 'RPS4XP21', 'RP11-109P14.8', 'EIF4A1P6', 'GNGT1', 'RP11-307I14.2', 'RPS15AP9', 'RP11-214N15.5', 'RPL7AP38', 'RPL17P20', 'AC092569.2', 'ABCB10P4', 'RP11-481K9.4', 'VDAC1P2', 'RP6-218J18.2', 'EEF1A1P15', 'CTD-2061E19.1', 'RP11-166J22.1', 'EEF1A1P16', 'RP11-343B5.1', 'RP11-388B24.4', 'PKMP2',…	ARCHS4 (coexpressed genes)	downregulated
NKX6-3_human_tf_ARCHS4_coexpression	-1.88579	175.306	3.10192e-38	4.23759e-41	['ATP5G2P1', 'RPL10L', 'ATP5BP1', 'AF131215.1', 'RP11-305L7.5', 'CTC-398G3.2', 'RPS4XP21', 'RP11-109P14.8', 'EIF4A1P6', 'RP11-307I14.2', 'RPS15AP9', 'RPL7AP38', 'RP11-481K9.4', 'VDAC1P2', 'CTD-2061E19.1', 'RP11-166J22.1', 'RP11-343B5.1', 'RP11-388B24.4', 'PKMP2', 'RPLP1P11', 'AC104076.2', 'RPS4XP6', 'RP3-486I3.4', 'RPL7P5', 'RP11-389O22.4', 'NPM1P43', 'COX5BP1', 'RP11-92C4.4', 'RPL36AP6', 'RP11-3…	ARCHS4 (coexpressed genes)	downregulated
ZNF625_human_tf_ARCHS4_coexpression	-2.08904	189.014	2.47717e-37	5.07616e-40	['MTND5P10', 'AC091654.7', 'ATP5G2P1', 'ZNF492', 'RPL10L', 'ATP5BP1', 'AF131215.1', 'RPL34P33', 'RP11-305L7.5', 'CTC-398G3.2', 'RPS4XP21', 'RP11-538P18.1', 'RP11-307I14.2', 'RPS15AP9', 'RP11-356M20.1', 'RPL17P20', 'AC092569.2', 'RP11-481K9.4', 'VDAC1P2', 'RP6-218J18.2', 'CTD-2061E19.1', 'RP11-343B5.1', 'RP11-388B24.4', 'AC092573.2', 'RPL7P5', 'TDGF1P3', 'COX5BP1', 'LA16C-3G11.7', 'RP11-92C4.4', '…	ARCHS4 (coexpressed genes)	downregulated
ZNF750_human_tf_ARCHS4_coexpression	-1.56469	43.3245	1.2714e-09	9.43872e-13	['COL17A1', 'PGLYRP4', 'SPRR3', 'C5ORF46', 'TACSTD2', 'KRT23', 'CST6', 'SCEL', 'ALDH3B2', 'TRIM29', 'DUOXA1', 'ANXA8', 'IL36RN', 'LY6G6C', 'SPRR2A', 'KRT6A', 'CDSN', 'KRT13', 'EMP1', 'KRT5', 'KRT31', 'XG', 'EPN3', 'GJB2', 'KRT17', 'GJB3', 'KRT16', 'KRT14', 'LY6D', 'RHCG', 'NPIPB7', 'SPRR1B', 'IVL']	ARCHS4 (coexpressed genes)	upregulated
DSP_human_tf_ARCHS4_coexpression	-1.59448	41.5445	1.6281e-09	4.83476e-12	['COL17A1', 'PGLYRP4', 'ITGB4', 'LAMA3', 'TACSTD2', 'KLK5', 'KRT23', 'CST6', 'PTHLH', 'SCEL', 'ALDH3B2', 'TRIM29', 'DUOXA1', 'ANXA8', 'IL36RN', 'ITGB6', 'LY6G6C', 'KRT6A', 'TFAP2A', 'CDSN', 'LAMB3', 'KRT5', 'XG', 'EPN3', 'GJB2', 'KRT17', 'GJB3', 'KRT16', 'KRT14', 'LY6D', 'SPRR1B', 'IVL']	ARCHS4 (coexpressed genes)	upregulated
FOXN1_human_tf_ARCHS4_coexpression	-1.58776	41.3693	1.6281e-09	4.83476e-12	['COL17A1', 'PGLYRP4', 'TACSTD2', 'CST6', 'KRT33B', 'SCEL', 'ALDH3B2', 'TRIM29', 'DUOXA1', 'ANXA8', 'IL36RN', 'LY6G6C', 'SPRR2A', 'KRT6A', 'CDSN', 'KRT13', 'EMP1', 'KRT34', 'KRT5', 'KRT31', 'EPN3', 'GJB2', 'KRT17', 'GJB3', 'KRT16', 'KRT14', 'LY6D', 'S100A3', 'GPRC5D', 'RHCG', 'SPRR1B', 'IVL']	ARCHS4 (coexpressed genes)	upregulated
TP63_human_tf_ARCHS4_coexpression	-1.60691	41.8684	1.6281e-09	4.83476e-12	['COL17A1', 'PGLYRP4', 'C5ORF46', 'ITGB4', 'LAMA3', 'TACSTD2', 'CST6', 'PTHLH', 'KRT16P6', 'SCEL', 'ALDH3B2', 'TRIM29', 'DUOXA1', 'ANXA8', 'IL36RN', 'ITGB6', 'LY6G6C', 'KRT6A', 'TFAP2A', 'CDSN', 'LAMB3', 'EMP1', 'KRT5', 'XG', 'GJB2', 'KRT17', 'GJB3', 'KRT16', 'KRT14', 'LY6D', 'SPRR1B', 'IVL']	ARCHS4 (coexpressed genes)	upregulated
BARX2_human_tf_ARCHS4_coexpression	-1.59369	38.9779	5.36255e-09	2.38866e-11	['PGLYRP4', 'SPRR3', 'TACSTD2', 'CST6', 'KRT33B', 'WNT6', 'SCEL', 'ALDH3B2', 'TRIM29', 'IGLV2-14', 'DUOXA1', 'IL36RN', 'LY6G6C', 'SPRR2A', 'WNT10A', 'CDSN', 'KRT13', 'EMP1', 'KRT31', 'IL22RA1', 'EPN3', 'IGLL5', 'CLDN4', 'GJB2', 'GJB3', 'KRT14', 'LY6D', 'GPRC5D', 'RHCG', 'SPRR1B', 'IVL']	ARCHS4 (coexpressed genes)	upregulated
GRHL3_human_tf_ARCHS4_coexpression	-1.55183	37.9542	5.36255e-09	2.38866e-11	['COL17A1', 'PGLYRP4', 'SPRR3', 'UPK2', 'TACSTD2', 'KRT23', 'KRT16P6', 'SCEL', 'ALDH3B2', 'TRIM29', 'DUOXA1', 'ANXA8', 'IL36RN', 'LY6G6C', 'SPRR2A', 'KRT6A', 'CDSN', 'KRT13', 'EMP1', 'KRT5', 'EPN3', 'CLDN4', 'GJB2', 'KRT17', 'GJB3', 'KRT16', 'KRT14', 'LY6D', 'RHCG', 'SPRR1B', 'IVL']	ARCHS4 (coexpressed genes)	upregulated
DLX3_human_tf_ARCHS4_coexpression	-1.62417	37.1889	2.18844e-08	1.13727e-10	['COL17A1', 'PGLYRP4', 'CLIC3', 'TACSTD2', 'IFI6', 'GATA3', 'VTCN1', 'CST6', 'KRT33B', 'ALDH3B2', 'TRIM29', 'ANXA8', 'LY6G6C', 'RBBP8NL', 'TFAP2A', 'WNT10A', 'CDSN', 'KRT34', 'UPK3B', 'KRT31', 'XG', 'EPN3', 'CLDN4', 'CLDN3', 'GJB3', 'KRT14', 'LY6D', 'S100A3', 'GPRC5D', 'IVL']	ARCHS4 (coexpressed genes)	upregulated
GRHL1_human_tf_ARCHS4_coexpression	-1.66453	35.5789	6.38364e-08	5.21307e-10	['PGLYRP4', 'SPRR3', 'TACSTD2', 'KLK5', 'DAPP1', 'KRT23', 'CST6', 'SCEL', 'ALDH3B2', 'TRIM29', 'DUOXA1', 'ANXA8', 'IL36RN', 'LY6G6C', 'SPRR2A', 'KRT6A', 'CDSN', 'CMTM5', 'KRT13', 'EPN3', 'GJB2', 'GJB3', 'KRT16', 'KRT14', 'LY6D', 'RHCG', 'SPRR1B', 'IVL', 'DDX11L2']	ARCHS4 (coexpressed genes)	upregulated
IRF6_human_tf_ARCHS4_coexpression	-1.50064	32.0757	6.38364e-08	5.21307e-10	['COL17A1', 'PGLYRP4', 'ITGB4', 'LAMA3', 'TACSTD2', 'KLK5', 'KRT23', 'PTHLH', 'SCEL', 'TRIM29', 'DUOXA1', 'ANXA8', 'IL36RN', 'ITGB6', 'SPRR2A', 'KRT6A', 'CDSN', 'LAMB3', 'KRT5', 'EPN3', 'CLDN4', 'GJB2', 'GJB3', 'KRT16', 'KRT14', 'LY6D', 'RHCG', 'SPRR1B', 'IVL']	ARCHS4 (coexpressed genes)	upregulated
OVOL1_human_tf_ARCHS4_coexpression	-1.57938	33.7587	6.38364e-08	5.21307e-10	['COL17A1', 'PGLYRP4', 'TACSTD2', 'KRT23', 'GATA3', 'SCEL', 'ALDH3B2', 'TRIM29', 'DUOXA1', 'ANXA8', 'IL36RN', 'LY6G6C', 'SPRR2A', 'PDZK1P1', 'KRT6A', 'CDSN', 'IL22RA1', 'EPN3', 'CLDN4', 'GJB2', 'CLDN3', 'KRT17', 'GJB3', 'KRT16', 'KRT14', 'LY6D', 'VGLL1', 'SPRR1B', 'IVL']	ARCHS4 (coexpressed genes)	upregulated
PPP1R13L_human_tf_ARCHS4_coexpression	-1.63683	34.9867	6.38364e-08	5.21307e-10	['COL17A1', 'PGLYRP4', 'ITGB4', 'LAMA3', 'TACSTD2', 'CST6', 'WNT6', 'SCEL', 'ALDH3B2', 'DUOXA1', 'ANXA8', 'LY6G6C', 'KRT6A', 'TFAP2A', 'CDSN', 'LAMB3', 'KRT7', 'KRT5', 'EPN3', 'CLDN4', 'GJB2', 'KRT17', 'GJB3', 'KRT16', 'KRT14', 'LY6D', 'RHCG', 'SPRR1B', 'IVL']	ARCHS4 (coexpressed genes)	upregulated
SUZ12_18692474_ChIP-Seq_MEFs_Mouse	-2.03412	46.3106	8.09714e-08	1.29554e-10	['BARHL1', 'PCSK2', 'HMX3', 'VIPR2', 'RAX', 'FGF3', 'SOX3', 'SIX6', 'SOX1', 'ZIC1', 'SIX3', 'FEZF2', 'FOXD1', 'SLC32A1', 'EDN3', 'TRPC4', 'NOG', 'PAX6', 'GFRA1', 'ADRA2A', 'POU3F4', 'GREM1', 'SFRP1', 'EEF1A2', 'RHCG', 'LY6H', 'HMX2', 'DLX1', 'DLX5', 'TACSTD2', 'DBX1', 'SEZ6', 'NRXN2', 'GATA3', 'CPLX2', 'PTHLH', 'WNT6', 'NT5E', 'CAMK2N1', 'NPTX1', 'OTX1', 'IGFBP6', 'WNT1', 'HES5', 'DRD4', 'NKX2-3'…	ChEA (experimentally validated targets)	upregulated
SUZ12_NT2-D1_hg19	-1.81154	39.7092	2.41401e-07	3.02128e-10	['BARHL1', 'DLX1', 'HMX3', 'DLX5', 'TMEM59L', 'DBX1', 'PTHLH', 'FGF3', 'CYP26B1', 'SIX6', 'SOX1', 'ZIC1', 'SIX3', 'MAP6', 'NPTX1', 'OTX1', 'FEZF2', 'WNT1', 'FEZF1', 'CCDC140', 'NKX2-3', 'TFAP2A', 'EGR3', 'SLC32A1', 'EDN3', 'EGR4', 'WNT3A', 'WNT7B', 'IGFBP3', 'WNT7A', 'PAX6', 'ARID3C', 'HPCAL4', 'GREM1', 'ADCYAP1', 'CYP26A1', 'SFRP1', 'LHX2', 'LHX5', 'CBLN4', 'HMX2', 'ASTN1']	ENCODE (experimentally validated targets)	upregulated
ZSCAN18_human_tf_ARCHS4_coexpression	-1.65841	32.9876	2.57981e-07	2.29827e-09	['TTYH1', 'TMEM59L', 'NRXN2', 'CEND1', 'JPH4', 'PCSK1N', 'GNG3', 'ADGRG1', 'CAMK2N2', 'ZIC1', 'BAALC', 'MAP6', 'CTNNA2', 'HES5', 'LRRC4B', 'CA11', 'CADM3', 'VSTM2L', 'SYP', 'HPCAL4', 'CLIP3', 'GPR162', 'LHX2', 'FEZ1', 'CNTN2', 'LY6H', 'PRR36', 'ASTN1']	ARCHS4 (coexpressed genes)	upregulated
SUZ12_27294783_Chip-Seq_ESCs_Mouse	-1.47182	30.2782	3.63534e-07	1.16331e-09	['BARHL1', 'HMX3', 'TMEM151B', 'CPNE7', 'IL24', 'RAX', 'KLHDC7B', 'SHD', 'DMBX1', 'SOX3', 'RIMS4', 'CYP26B1', 'SIX6', 'SOX1', 'ZIC1', 'INSL3', 'FEZF2', 'MYOZ1', 'FEZF1', 'LMO1', 'SEMA6B', 'FOXD1', 'SLC32A1', 'UNC5A', 'IGFBP3', 'NOG', 'VSTM2L', 'PAX6', 'SHISA2', 'GREM1', 'EPN3', 'ADCYAP1', 'CYP26C1', 'VGF', 'MYOD1', 'EEF1A2', 'FAM84A', 'LTB', 'CRYAA', 'HMX2', 'DLX1', 'PKDCC', 'DLX5', 'NXPH3', 'TME…	ChEA (experimentally validated targets)	upregulated
BARHL2_human_tf_ARCHS4_coexpression	-1.73286	31.967	1.00866e-06	9.73467e-09	['NXPH3', 'TMEM59L', 'NRXN2', 'CEND1', 'CPLX2', 'SHD', 'JPH4', 'GNG3', 'ADGRG1', 'HRH3', 'CAMK2N2', 'ZIC1', 'GNG8', 'BAALC', 'MAP6', 'FEZF1', 'LRRC4B', 'CA11', 'CADM3', 'SYP', 'CLIP3', 'GPR162', 'TMEM114', 'FAM131C', 'LHX2', 'CNTN2', 'PRR36']	ARCHS4 (coexpressed genes)	upregulated
SUZ12_18555785_ChIP-Seq_MESCs_Mouse	-2.15486	38.64	3.39753e-06	1.63082e-08	['HMX3', 'CPNE7', 'FGF3', 'DMBX1', 'GRM3', 'JPH4', 'SOX3', 'GPR176', 'SOX1', 'DUOXA1', 'ZIC1', 'FEZF2', 'FOXD1', 'EDN3', 'TRPC4', 'IGFBP3', 'NOG', 'GFRA1', 'ADRA2A', 'POU3F4', 'GREM1', 'MYOD1', 'LY6H', 'DLX1', 'DLX5', 'TMEM59L', 'TACSTD2', 'DBX1', 'SEZ6', 'NRXN2', 'PTHLH', 'WNT6', 'HRH3', 'ABLIM3', 'CDH22', 'NPTX1', 'OTX1', 'WNT1', 'HES5', 'DRD4', 'NKX2-3', 'KCNF1', 'WNT10A', 'EGR3', 'KCNIP1', 'C…	ChEA (experimentally validated targets)	upregulated
SCRT1_human_tf_ARCHS4_coexpression	-1.59979	27.2687	3.55332e-06	3.95692e-08	['TMEM151B', 'TMEM59L', 'NRXN2', 'CEND1', 'CPLX2', 'JPH4', 'PCSK1N', 'ADGRG1', 'HRH3', 'CAMK2N1', 'CAMK2N2', 'GNG8', 'MAP6', 'LRRC4B', 'CA11', 'CADM3', 'UNC5A', 'SYP', 'HPCAL4', 'CLIP3', 'GPR162', 'CYP26C1', 'FAM131C', 'CNTN2', 'LHX5', 'PRR36']	ARCHS4 (coexpressed genes)	upregulated
ZIC4_human_tf_ARCHS4_coexpression	-1.65094	28.1406	3.55332e-06	3.95692e-08	['NLGN3', 'TMEM151B', 'TTYH1', 'NXPH3', 'TMEM59L', 'NRXN2', 'CEND1', 'CPLX2', 'JPH4', 'SOX1', 'SIX3', 'MAP6', 'FEZF1', 'GALNT9', 'LRRC4B', 'CADM3', 'BTBD17', 'SYT9', 'HPCAL4', 'CLIP3', 'GPR162', 'LHX2', 'FEZ1', 'LY6H', 'PRR36', 'ASTN1']	ARCHS4 (coexpressed genes)	upregulated
HIF3A_human_tf_ARCHS4_coexpression	-1.9222	35.4599	3.56289e-06	9.73467e-09	['EEF1A1P7', 'LDHAP4', 'RP11-147K6.2', 'LDHAP7', 'EIF4A1P10', 'RP1-130H16.18', 'EIF1P4', 'POTEKP', 'GAPDHP29', 'MYL6P2', 'RP11-440K22.1', 'RP11-64K7.1', 'EEF1A1P16', 'EEF1A1P17', 'RP11-804H8.5', 'UQCRFS1P1', 'PPIAP22', 'RP4-765C7.2', 'RP4-570O12.2', 'RP11-697N18.1', 'FTH1P5', 'RP11-641C17.1', 'UBBP3', 'UBBP1', 'COX5BP1', 'RP11-543B16.2', 'GAPDHP51']	ARCHS4 (coexpressed genes)	downregulated
EZH2_27304074_Chip-Seq_ESCs_Mouse	-2.1468	35.4191	7.56594e-06	6.83532e-08	['CPNE7', 'RAX', 'DMBX1', 'SOX3', 'GPR176', 'CYP26B1', 'SOX1', 'ZIC1', 'INSL3', 'FEZF2', 'FEZF1', 'LMO1', 'FOXD1', 'SLC32A1', 'UNC5A', 'NOG', 'PAX6', 'GFRA1', 'ADRA2A', 'SFRP1', 'OLFM2', 'FAM84A', 'LY6H', 'HMX2', 'DLX1', 'DLX5', 'TACSTD2', 'DBX1', 'SEZ6', 'GATA3', 'WNT6', 'NT5E', 'CDH22', 'NPTX1', 'OTX1', 'RHBDL3', 'WNT1', 'DRD4', 'NKX2-3', 'WNT4', 'WNT10A', 'EGR2', 'EGR3', 'WNT3A', 'WNT7B', 'HS3…	ChEA (experimentally validated targets)	upregulated
RNF2_18974828_ChIP-Seq_MESCs_Mouse	-2.04532	33.6207	7.56594e-06	7.2633e-08	['HMX3', 'CPNE7', 'RAX', 'FGF3', 'DMBX1', 'SOX3', 'RIMS4', 'GPR176', 'SIX6', 'SOX1', 'PLAU', 'ZIC1', 'SIX3', 'FEZF2', 'FOXD1', 'NOG', 'PAX6', 'GFRA1', 'HPCAL4', 'ADRA2A', 'GREM1', 'SFRP1', 'OLFM2', 'CLDN3', 'VGF', 'HMX2', 'DLX1', 'DLX5', 'TACSTD2', 'DBX1', 'SEZ6', 'PDGFB', 'NRXN2', 'GATA3', 'TULP1', 'PTHLH', 'WNT6', 'NT5E', 'HRH3', 'CAMK2N1', 'CDH22', 'NPTX1', 'OTX1', 'RHBDL3', 'WNT1', 'HES5', 'N…	ChEA (experimentally validated targets)	upregulated
EZH2_18974828_ChIP-Seq_MESCs_Mouse	-2.05102	33.7144	7.56594e-06	7.2633e-08	['HMX3', 'CPNE7', 'RAX', 'FGF3', 'DMBX1', 'SOX3', 'RIMS4', 'GPR176', 'SIX6', 'SOX1', 'PLAU', 'ZIC1', 'SIX3', 'FEZF2', 'FOXD1', 'NOG', 'PAX6', 'GFRA1', 'HPCAL4', 'ADRA2A', 'GREM1', 'SFRP1', 'OLFM2', 'CLDN3', 'VGF', 'HMX2', 'DLX1', 'DLX5', 'TACSTD2', 'DBX1', 'SEZ6', 'PDGFB', 'NRXN2', 'GATA3', 'TULP1', 'PTHLH', 'WNT6', 'NT5E', 'HRH3', 'CAMK2N1', 'CDH22', 'NPTX1', 'OTX1', 'RHBDL3', 'WNT1', 'HES5', 'N…	ChEA (experimentally validated targets)	upregulated
SUZ12_18692474_ChIP-Seq_MESCs_Mouse	-1.80601	29.1353	8.80185e-06	9.85808e-08	['BARHL1', 'PCSK2', 'HMX3', 'VIPR2', 'ITGB4', 'CPNE7', 'RAX', 'FGF3', 'DMBX1', 'GRM3', 'SOX3', 'GPR176', 'SIX6', 'SOX1', 'DUOXA1', 'ZIC1', 'SIX3', 'FEZF2', 'LMO1', 'FOXD1', 'SLC32A1', 'EDN3', 'UNC5A', 'TRPC4', 'NOG', 'PAX6', 'GFRA1', 'ADRA2A', 'POU3F4', 'GREM1', 'SFRP1', 'OLFM2', 'VGF', 'EEF1A2', 'RHCG', 'LY6H', 'HMX2', 'DLX1', 'DLX5', 'LUZP2', 'HTRA3', 'TACSTD2', 'DBX1', 'SEZ6', 'NRXN2', 'GATA3'…	ChEA (experimentally validated targets)	upregulated
NKX6-2_human_tf_ARCHS4_coexpression	-1.59944	25.0876	1.29786e-05	1.54163e-07	['PLEKHB1', 'TMEM59L', 'NRXN2', 'CEND1', 'CPLX2', 'GRM3', 'JPH4', 'ADGRG1', 'CAMK2N1', 'ZIC1', 'SIX3', 'BAALC', 'MAP6', 'LRRC4B', 'CA11', 'CADM3', 'UNC5A', 'SYP', 'CLIP3', 'GPR162', 'RP11-756A22.7', 'FEZ1', 'CERCAM', 'CNTN2', 'LY6H']	ARCHS4 (coexpressed genes)	upregulated
JARID2_20075857_ChIP-Seq_MESCs_Mouse	-1.91547	27.7237	3.88486e-05	5.17866e-07	['HMX3', 'TMEM151B', 'RAX', 'FGF3', 'DMBX1', 'SOX3', 'CYP26B1', 'SIX6', 'SOX1', 'ZIC1', 'SIX3', 'INSL3', 'FEZF2', 'FEZF1', 'FOXD1', 'SLC32A1', 'NOG', 'PAX6', 'GFRA1', 'ADRA2A', 'GREM1', 'CLDN3', 'CYP26C1', 'EEF1A2', 'FAM84A', 'HMX2', 'DLX1', 'PKDCC', 'DLX5', 'NXPH3', 'TMEM59L', 'DBX1', 'SEZ6', 'GATA3', 'TULP1', 'WNT6', 'NT5E', 'HRH3', 'CDH22', 'NPTX1', 'OTX1', 'WNT1', 'DRD4', 'NKX2-3', 'WNT4', 'W…	ChEA (experimentally validated targets)	upregulated
JARID2_20064375_ChIP-Seq_MESCs_Mouse	-1.99593	28.7341	3.88486e-05	5.5942e-07	['BARHL1', 'HMX3', 'CPNE7', 'RAX', 'FGF3', 'DMBX1', 'SOX3', 'GPR176', 'CYP26B1', 'SIX6', 'SOX1', 'ZIC1', 'SIX3', 'FEZF2', 'FOXD1', 'SLC32A1', 'NOG', 'PAX6', 'GFRA1', 'ADRA2A', 'GREM1', 'SFRP1', 'CYP26C1', 'ASTL', 'HMX2', 'NECAB2', 'DLX1', 'TMEM59L', 'TACSTD2', 'NRXN2', 'GATA3', 'PTHLH', 'WNT6', 'NT5E', 'CDH22', 'NPTX1', 'OTX1', 'RHBDL3', 'WNT1', 'HES5', 'DRD4', 'NKX2-3', 'WNT10A', 'EGR2', 'EGR3',…	ChEA (experimentally validated targets)	upregulated
BARHL1_human_tf_ARCHS4_coexpression	-1.72863	24.8387	4.30245e-05	5.74938e-07	['CADM3', 'TMEM151B', 'UNC5A', 'NXPH3', 'TMEM59L', 'NRXN2', 'CEND1', 'CPLX2', 'HPCAL4', 'CLIP3', 'JPH4', 'GPR162', 'GNG3', 'CAMK2N1', 'CDH22', 'ZIC1', 'CNTN2', 'MAP6', 'CTNNA2', 'NPTX1', 'OTX1', 'RHBDL3', 'PRR36', 'LRRC4B']	ARCHS4 (coexpressed genes)	upregulated
ARNTL2_human_tf_ARCHS4_coexpression	-1.55971	22.4115	4.30245e-05	5.74938e-07	['COL17A1', 'LAMB3', 'ITGB4', 'SERPINE1', 'LAMA3', 'TACSTD2', 'KRT13', 'KRT7', 'EMP1', 'KRT5', 'PTHLH', 'SCEL', 'NT5E', 'GJB2', 'KRT17', 'GJB3', 'TRIM29', 'PLAU', 'KRT14', 'ANXA8', 'IL36RN', 'RHCG', 'SPRR1B', 'KRT6A']	ARCHS4 (coexpressed genes)	upregulated
RNF2_27304074_Chip-Seq_ESCs_Mouse	-1.69988	23.2508	7.17207e-05	1.14753e-06	['BARHL1', 'TMEM151B', 'RAX', 'DMBX1', 'JPH4', 'CYP26B1', 'SIX6', 'SOX1', 'ZIC1', 'INSL3', 'FEZF2', 'FEZF1', 'LMO1', 'FOXD1', 'SLC32A1', 'IGFBP3', 'NOG', 'PAX6', 'GFRA1', 'SHISA2', 'ADRA2A', 'OLFM2', 'VGF', 'FAM84A', 'HMX2', 'NECAB2', 'PKDCC', 'DLX5', 'TACSTD2', 'SEZ6', 'NRXN2', 'TULP1', 'CPLX2', 'WNT6', 'SCRT2', 'CAMK2N1', 'SLITRK6', 'GNG8', 'NPTX1', 'OTX1', 'HES3', 'RHBDL3', 'WNT1', 'HES5', 'DR…	ChEA (experimentally validated targets)	upregulated
MYT1_human_tf_ARCHS4_coexpression	-1.68184	22.0285	0.000102254	2.04962e-06	['NRXN2', 'CLIP3', 'JPH4', 'SCRT2', 'GPR162', 'PCSK1N', 'GNG3', 'ADGRG1', 'LHX2', 'MAP2', 'FEZ1', 'CAMK2N2', 'CDH22', 'ZIC1', 'SIX3', 'CNTN2', 'GNG8', 'MAP6', 'LHX5', 'CTNNA2', 'RHBDL3', 'PRR36', 'ASTN1']	ARCHS4 (coexpressed genes)	upregulated
ZBED2_human_tf_ARCHS4_coexpression	-1.66029	21.7463	0.000102254	2.04962e-06	['COL17A1', 'EGR2', 'LAMB3', 'LAMA3', 'KRT5', 'CMAHP', 'HAPLN3', 'PWP2', 'MSLN', 'PTHLH', 'PSMB8', 'KRT16P6', 'SCEL', 'CH507-9B2.4', 'GJB2', 'UPK1B', 'KRT17', 'GJB3', 'TRBC2', 'KRT14', 'ANXA8', 'GBP2', 'KRT6A']	ARCHS4 (coexpressed genes)	upregulated
RGS11_human_tf_ARCHS4_coexpression	-1.57291	20.6017	0.000102254	2.04962e-06	['CA11', 'CADM3', 'TMEM151B', 'UNC5A', 'NXPH3', 'PLEKHB1', 'TMEM59L', 'NRXN2', 'CEND1', 'SYP', 'CPLX2', 'HPCAL4', 'CLIP3', 'JPH4', 'GPR162', 'PCSK1N', 'TCEAL6', 'CAMK2N1', 'CDH22', 'CERCAM', 'NPTX1', 'MXRA5Y', 'LRRC4B']	ARCHS4 (coexpressed genes)	upregulated
SP6_human_tf_ARCHS4_coexpression	-1.57054	20.5707	0.000102254	2.04962e-06	['PGLYRP4', 'NOS2', 'ODAM', 'UPK2', 'ITGB4', 'CGB8', 'TACSTD2', 'IFI6', 'KRT7', 'KRT23', 'VTCN1', 'EPN3', 'WNT6', 'ALDH3B2', 'CLDN4', 'GJB3', 'TRIM29', 'ANXA8', 'LY6G6C', 'VGLL1', 'NPIPB7', 'KANK4', 'RBBP8NL']	ARCHS4 (coexpressed genes)	upregulated
ZIC1_human_tf_ARCHS4_coexpression	-1.55365	20.3495	0.000102254	2.04962e-06	['CA11', 'CADM3', 'TMEM151B', 'NXPH3', 'TMEM59L', 'NRXN2', 'CEND1', 'SYP', 'CPLX2', 'HPCAL4', 'CLIP3', 'JPH4', 'GPR162', 'SOX1', 'MAP2', 'FEZ1', 'CDH22', 'SIX3', 'MAP6', 'CTNNA2', 'NPTX1', 'PRR36', 'LRRC4B']	ARCHS4 (coexpressed genes)	upregulated
CSDC2_human_tf_ARCHS4_coexpression	-1.62503	21.2844	0.000102254	2.04962e-06	['NLGN3', 'CA11', 'CADM3', 'TMEM151B', 'NXPH3', 'PLEKHB1', 'TMEM59L', 'NRXN2', 'CEND1', 'SYP', 'CPLX2', 'HPCAL4', 'CLIP3', 'JPH4', 'GPR162', 'RIMS4', 'OLFM2', 'PCSK1N', 'FEZ1', 'CDH22', 'CTNNA2', 'LY6H', 'ASTN1']	ARCHS4 (coexpressed genes)	upregulated
OLIG1_human_tf_ARCHS4_coexpression	-1.48679	19.4737	0.000102254	2.04962e-06	['NLGN3', 'CA11', 'VIPR2', 'NXPH3', 'CADM2', 'CMTM5', 'PLEKHB1', 'TMEM59L', 'NRXN2', 'CEND1', 'SHD', 'CLIP3', 'JPH4', 'GPR162', 'OLFM2', 'PCSK1N', 'ADGRG1', 'FEZ1', 'SMOC1', 'BAALC', 'RHBDL3', 'ASTN1', 'LRRC4B']	ARCHS4 (coexpressed genes)	upregulated
KRTAP5-1_human_tf_ARCHS4_coexpression	-1.60037	20.9614	0.000102254	2.04962e-06	['PGLYRP4', 'AC004231.7', 'CDSN', 'KRT34', 'GATA3', 'KRT31', 'CST6', 'EPN3', 'KRT33B', 'GGTLC2', 'ALDH3B2', 'OLFM2', 'GJB2', 'TRIM29', 'KRT14', 'PADI3', 'LY6D', 'S100A3', 'LY6G6C', 'KRTAP2-3', 'GPRC5D', 'IVL', 'PRR36']	ARCHS4 (coexpressed genes)	upregulated
EHF_human_tf_ARCHS4_coexpression	-1.49413	19.5699	0.000102254	2.04962e-06	['PGLYRP4', 'TACSTD2', 'KRT13', 'KRT23', 'EPN3', 'SCEL', 'ALDH3B2', 'CLDN4', 'GJB2', 'CLDN3', 'GJB3', 'TRIM29', 'DUOXA1', 'LCN2', 'AGR2', 'LY6D', 'ANXA8', 'IL36RN', 'RHCG', 'SPRR2A', 'SPRR1B', 'IVL', 'KRT6A']	ARCHS4 (coexpressed genes)	upregulated
MTF2_20144788_ChIP-Seq_MESCs_Mouse	-1.23167	15.9309	0.000122996	2.41362e-06	['TUSC5', 'VIPR2', 'CPNE7', 'RAX', 'FGF3', 'SOX3', 'RIMS4', 'GPR176', 'SOX1', 'HMCN2', 'LMO1', 'SEMA6B', 'TLE2', 'UNC5A', 'IGFBP3', 'SHISA2', 'POU3F4', 'SFRP1', 'OLFM2', 'CLDN3', 'ASTL', 'FEZ1', 'LY6H', 'KANK4', 'ASTN1', 'DLX1', 'DLX5', 'HTRA3', 'TMEM59L', 'TACSTD2', 'PDGFB', 'GATA3', 'WNT6', 'HRH3', 'CDH22', 'NPTX1', 'OTX1', 'IGFBP6', 'RHBDL3', 'WNT1', 'DRD4', 'NKX2-3', 'WNT4', 'KCNF1', 'EGR1', …	ChEA (experimentally validated targets)	upregulated
SUZ12_18974828_ChIP-Seq_MESCs_Mouse	-1.69337	21.8893	0.000122996	2.43286e-06	['HMX3', 'CPNE7', 'RAX', 'FGF3', 'DMBX1', 'GRM3', 'JPH4', 'SOX3', 'GPR176', 'SIX6', 'SOX1', 'PLAU', 'DUOXA1', 'ZIC1', 'SIX3', 'FEZF2', 'LMO1', 'MMP7', 'FOXD1', 'SLC32A1', 'TRPC4', 'IGFBP3', 'NOG', 'PAX6', 'GFRA1', 'HPCAL4', 'ADRA2A', 'POU3F4', 'GREM1', 'OLFM2', 'CLDN3', 'MYOD1', 'LY6H', 'HMX2', 'DLX1', 'DLX5', 'LUZP2', 'TACSTD2', 'DBX1', 'SEZ6', 'PDGFB', 'GATA3', 'TULP1', 'CPLX2', 'PTHLH', 'WNT6'…	ChEA (experimentally validated targets)	upregulated
EZH2_27294783_Chip-Seq_ESCs_Mouse	-1.45792	18.7724	0.000122996	2.55833e-06	['BARHL1', 'HMX3', 'TMEM151B', 'ITGB4', 'IL24', 'RAX', 'DMBX1', 'TMEM221', 'SOX3', 'CYP26B1', 'SIX6', 'SOX1', 'DUOXA1', 'ZIC1', 'SIX3', 'TIMP3', 'INSL3', 'FEZF2', 'FEZF1', 'LMO1', 'SEMA6B', 'FOXD1', 'SLC32A1', 'UNC5A', 'TRPC4', 'IGFBP3', 'NOG', 'PAX6', 'GFRA1', 'ADRA2A', 'EPN3', 'ADCYAP1', 'CYP26C1', 'VGF', 'EEF1A2', 'FAM84A', 'LTB', 'LY6H', 'HMX2', 'DLX1', 'DLX5', 'TMEM59L', 'TACSTD2', 'DBX1', '…	ChEA (experimentally validated targets)	upregulated
SOHLH1_human_tf_ARCHS4_coexpression	-1.54844	18.3851	0.000276299	6.97414e-06	['CA11', 'CADM3', 'PNCK', 'TMEM151B', 'UNC5A', 'PLEKHB1', 'TMEM59L', 'NRXN2', 'CEND1', 'SYP', 'CPLX2', 'HPCAL4', 'CLIP3', 'JPH4', 'GPR162', 'RIMS4', 'PCSK1N', 'TCEAL6', 'HRH3', 'CAMK2N1', 'CDH22', 'LY6H']	ARCHS4 (coexpressed genes)	upregulated
THRA_human_tf_ARCHS4_coexpression	-1.52968	18.1623	0.000276299	6.97414e-06	['CA11', 'CADM3', 'TMEM151B', 'UNC5A', 'NXPH3', 'PLEKHB1', 'TMEM59L', 'NRXN2', 'CEND1', 'SYP', 'CPLX2', 'HPCAL4', 'CLIP3', 'JPH4', 'GPR162', 'RIMS4', 'OLFM2', 'PCSK1N', 'EEF1A2', 'CDH22', 'ASTN1', 'LRRC4B']	ARCHS4 (coexpressed genes)	upregulated
SOX8_human_tf_ARCHS4_coexpression	-1.51522	17.9906	0.000276299	6.97414e-06	['NLGN3', 'VIPR2', 'TTYH1', 'NXPH3', 'CADM2', 'CMTM5', 'PLEKHB1', 'TMEM59L', 'NRXN2', 'SHD', 'CLIP3', 'JPH4', 'GPR162', 'OLFM2', 'PCSK1N', 'ADGRG1', 'FEZ1', 'SMOC1', 'BAALC', 'RHBDL3', 'ASTN1', 'LRRC4B']	ARCHS4 (coexpressed genes)	upregulated
RAPGEF4_human_tf_ARCHS4_coexpression	-1.51131	17.9442	0.000276299	6.97414e-06	['CA11', 'CADM3', 'TMEM151B', 'UNC5A', 'NXPH3', 'CADM2', 'PLEKHB1', 'TMEM59L', 'NRXN2', 'CEND1', 'SYP', 'CPLX2', 'HPCAL4', 'CLIP3', 'JPH4', 'GPR162', 'RIMS4', 'PCSK1N', 'TCEAL6', 'CAMK2N1', 'CDH22', 'NPTX1']	ARCHS4 (coexpressed genes)	upregulated
ZNF365_human_tf_ARCHS4_coexpression	-1.49761	17.7816	0.000276299	6.97414e-06	['CA11', 'CADM3', 'C11ORF87', 'TMEM151B', 'UNC5A', 'NXPH3', 'CADM2', 'PLEKHB1', 'TMEM59L', 'SLC4A10', 'NRXN2', 'CEND1', 'SYP', 'CPLX2', 'HPCAL4', 'CLIP3', 'JPH4', 'TCEAL6', 'CAMK2N1', 'CDH22', 'NPTX1', 'ASTN1']	ARCHS4 (coexpressed genes)	upregulated
RGS7_human_tf_ARCHS4_coexpression	-1.4939	17.7375	0.000276299	6.97414e-06	['PCSK2', 'CA11', 'CADM3', 'C11ORF87', 'TMEM151B', 'UNC5A', 'CADM2', 'TMEM59L', 'SLC4A10', 'NRXN2', 'CEND1', 'SYP', 'CPLX2', 'HPCAL4', 'CLIP3', 'JPH4', 'PCSK1N', 'TCEAL6', 'CAMK2N1', 'MAP2', 'CDH22', 'NPTX1']	ARCHS4 (coexpressed genes)	upregulated
BNC1_human_tf_ARCHS4_coexpression	-1.57295	18.6761	0.000276299	6.97414e-06	['COL17A1', 'LAMB3', 'ITGB4', 'LAMA3', 'TACSTD2', 'KRT7', 'KRT5', 'PTHLH', 'KRT16P6', 'TUBA3E', 'EPGN', 'GJB2', 'KRT17', 'GJB3', 'TRIM29', 'KRT16', 'KRT14', 'ANXA8', 'ITGB6', 'SPRR1B', 'KANK4', 'KRT6A']	ARCHS4 (coexpressed genes)	upregulated
SUZ12_16625203_ChIP-ChIP_MESCs_Mouse	-2.50136	29.8775	0.000289958	6.49505e-06	['BARHL1', 'HMX3', 'CPNE7', 'RAX', 'FGF3', 'GRM3', 'SIX6', 'ZIC1', 'SIX3', 'LMO1', 'FOXD1', 'SLC32A1', 'TRPC4', 'NOG', 'PAX6', 'GFRA1', 'HPCAL4', 'POU3F4', 'SFRP1', 'MYOD1', 'EEF1A2', 'LY6H', 'HMX2', 'DLX1', 'LUZP2', 'TACSTD2', 'DBX1', 'SEZ6', 'GATA3', 'TULP1', 'PTHLH', 'WNT6', 'NT5E', 'CDH22', 'NPTX1', 'OTX1', 'IGFBP6', 'WNT1', 'HES5', 'DRD4', 'NKX2-3', 'KCNF1', 'WNT10A', 'EGR2', 'EGR3', 'EGR4',…	ChEA (experimentally validated targets)	upregulated
EED_16625203_ChIP-ChIP_MESCs_Mouse	-2.63086	29.6706	0.000527061	1.26495e-05	['BARHL1', 'DLX1', 'CPNE7', 'TACSTD2', 'DBX1', 'SEZ6', 'RAX', 'GATA3', 'PTHLH', 'FGF3', 'SOX3', 'NT5E', 'SIX6', 'HRH3', 'CDH22', 'ZIC1', 'SIX3', 'NPTX1', 'OTX1', 'WNT1', 'HES5', 'NKX2-3', 'KCNF1', 'FOXD1', 'EGR3', 'SLC32A1', 'EGR4', 'WNT3A', 'NOG', 'HTR1A', 'WNT7A', 'PAX6', 'GFRA1', 'HPCAL4', 'POU3F4', 'CYP26A1', 'CLDN3', 'LHX2', 'MYOD1', 'EEF1A2', 'LHX5', 'CBLN4']	ChEA (experimentally validated targets)	upregulated
POU3F3_human_tf_ARCHS4_coexpression	-1.50898	16.1415	0.00076152	2.26138e-05	['NLGN3', 'CCDC177', 'BTBD17', 'TTYH1', 'NRXN2', 'POU3F4', 'CLIP3', 'JPH4', 'ADGRG1', 'SOX1', 'LHX2', 'MAP2', 'FEZ1', 'SMOC1', 'ZIC1', 'MAP6', 'CTNNA2', 'HES5', 'PRR36', 'ASTN1', 'LRRC4B']	ARCHS4 (coexpressed genes)	upregulated
POU6F1_human_tf_ARCHS4_coexpression	-1.46998	15.7243	0.00076152	2.26138e-05	['CA11', 'CADM3', 'TMEM151B', 'UNC5A', 'NXPH3', 'CADM2', 'PLEKHB1', 'TMEM59L', 'NRXN2', 'CEND1', 'SYP', 'CPLX2', 'HPCAL4', 'CLIP3', 'JPH4', 'GPR162', 'RIMS4', 'FEZ1', 'CDH22', 'CTNNA2', 'ASTN1']	ARCHS4 (coexpressed genes)	upregulated
ARNT2_human_tf_ARCHS4_coexpression	-1.49937	16.0386	0.00076152	2.26138e-05	['CA11', 'CADM3', 'TMEM151B', 'UNC5A', 'CADM2', 'PLEKHB1', 'TMEM59L', 'NRXN2', 'CEND1', 'SYP', 'CPLX2', 'HPCAL4', 'CLIP3', 'JPH4', 'RIMS4', 'CAMK2N1', 'MAP2', 'BAALC', 'CTNNA2', 'ASTN1', 'LRRC4B']	ARCHS4 (coexpressed genes)	upregulated
PLEK2_human_tf_ARCHS4_coexpression	-1.54805	16.5594	0.00076152	2.26138e-05	['COL17A1', 'TNFRSF6B', 'LAMB3', 'ITGB4', 'LAMA3', 'KRT7', 'KRT5', 'PTHLH', 'CLDN4', 'NT5E', 'GJB2', 'ASTL', 'KRT17', 'GJB3', 'PLAU', 'KRT14', 'ANXA8', 'S100A3', 'SLC38A8', 'KRT6A', 'ZP4']	ARCHS4 (coexpressed genes)	upregulated
DPF1_human_tf_ARCHS4_coexpression	-1.61865	17.3146	0.00076152	2.26138e-05	['NLGN3', 'SLC32A1', 'TMEM59L', 'NRXN2', 'SYP', 'HPCAL4', 'CLIP3', 'JPH4', 'SCRT2', 'GPR162', 'RIMS4', 'PCSK1N', 'GNG3', 'MAP2', 'FEZ1', 'MAP6', 'CTNNA2', 'LY6H', 'PRR36', 'ASTN1', 'LRRC4B']	ARCHS4 (coexpressed genes)	upregulated
TERF2IP_human_tf_ARCHS4_coexpression	-1.5308	16.3749	0.00076152	2.26138e-05	['NLGN3', 'DLX1', 'CADM3', 'SLC32A1', 'DLX5', 'TMEM59L', 'NRXN2', 'CEND1', 'SYP', 'HPCAL4', 'CLIP3', 'JPH4', 'GPR162', 'PCSK1N', 'GNG3', 'MAP2', 'FEZ1', 'CTNNA2', 'LY6H', 'AL049829.1', 'ASTN1']	ARCHS4 (coexpressed genes)	upregulated
SUZ12_20075857_ChIP-Seq_MESCs_Mouse	-0.789536	8.49863	0.000826005	2.11457e-05	['VIPR2', 'SCT', 'CPNE7', 'RAX', 'KLHDC7B', 'TNF', 'FGF3', 'SOX3', 'RIMS4', 'GPR176', 'SOX1', 'TRIM29', 'PLAU', 'DUOXA1', 'LMO1', 'UNC5A', 'IGFBP3', 'KRT7', 'SHISA2', 'HPCAL4', 'POU3F4', 'GPR162', 'ADCYAP1', 'SFRP1', 'OLFM2', 'CLDN3', 'ASTL', 'CLDN9', 'EEF1A2', 'RHCG', 'LY6H', 'KANK4', 'ASTN1', 'NECAB2', 'DLX1', 'PKDCC', 'DLX5', 'NXPH3', 'HTRA3', 'TMEM59L', 'TACSTD2', 'PDGFB', 'GATA3', 'CPLX2', '…	ChEA (experimentally validated targets)	upregulated
CAMTA1_human_tf_ARCHS4_coexpression	-1.51879	14.5356	0.00204261	6.97549e-05	['CA11', 'CADM3', 'C11ORF87', 'CADM2', 'TMEM59L', 'NRXN2', 'CEND1', 'SYP', 'CPLX2', 'HPCAL4', 'CLIP3', 'JPH4', 'TCEAL6', 'GNG3', 'CAMK2N1', 'MAP2', 'FEZ1', 'MAP6', 'CTNNA2', 'ASTN1']	ARCHS4 (coexpressed genes)	upregulated
FBXO41_human_tf_ARCHS4_coexpression	-1.51467	14.4962	0.00204261	6.97549e-05	['CA11', 'CADM3', 'TMEM151B', 'UNC5A', 'NXPH3', 'PLEKHB1', 'TMEM59L', 'NRXN2', 'CEND1', 'SYP', 'CPLX2', 'HPCAL4', 'CLIP3', 'JPH4', 'GPR162', 'RIMS4', 'HRH3', 'CAMK2N1', 'CDH22', 'NPTX1']	ARCHS4 (coexpressed genes)	upregulated
TEF_human_tf_ARCHS4_coexpression	-1.47824	14.1475	0.00204261	6.97549e-05	['CA11', 'CADM3', 'TMEM151B', 'UNC5A', 'NXPH3', 'PLEKHB1', 'TMEM59L', 'NRXN2', 'CEND1', 'SYP', 'CPLX2', 'HPCAL4', 'CLIP3', 'JPH4', 'GPR162', 'RIMS4', 'TCEAL6', 'EEF1A2', 'CDH22', 'NPTX1']	ARCHS4 (coexpressed genes)	upregulated
OLIG2_human_tf_ARCHS4_coexpression	-1.47638	14.1297	0.00204261	6.97549e-05	['NLGN3', 'VIPR2', 'NXPH3', 'CADM2', 'PLEKHB1', 'TMEM59L', 'NRXN2', 'SHD', 'CLIP3', 'JPH4', 'GPR162', 'OLFM2', 'PCSK1N', 'ADGRG1', 'FEZ1', 'SMOC1', 'BAALC', 'RHBDL3', 'ASTN1', 'LRRC4B']	ARCHS4 (coexpressed genes)	upregulated
NR2F1_human_tf_ARCHS4_coexpression	-1.53311	14.6726	0.00204261	6.97549e-05	['NECAB2', 'NLGN3', 'CADM3', 'TTYH1', 'WNT7B', 'NRXN2', 'POU3F4', 'GRM3', 'CLIP3', 'ADGRG1', 'SOX1', 'CYP26C1', 'MAP2', 'FEZ1', 'ZIC1', 'ID4', 'CTNNA2', 'HES5', 'PRR36', 'LRRC4B']	ARCHS4 (coexpressed genes)	upregulated
PAX9_human_tf_ARCHS4_coexpression	-1.54252	14.7627	0.00204261	6.97549e-05	['STOML3', 'SPRR3', 'C2ORF40', 'TMEM190', 'TACSTD2', 'KRT13', 'EMP1', 'EPN3', 'KCNE1B', 'SCEL', 'GJB2', 'MORN5', 'TRIM29', 'DUOXA1', 'C10ORF107', 'LY6D', 'ANXA8', 'RHCG', 'SPRR2A', 'SPRR1B']	ARCHS4 (coexpressed genes)	upregulated
TUB_human_tf_ARCHS4_coexpression	-1.4622	12.4226	0.00550413	0.000204311	['CADM3', 'C11ORF87', 'TMEM151B', 'CADM2', 'TMEM59L', 'NRXN2', 'VSTM2L', 'SYP', 'CPLX2', 'HPCAL4', 'CLIP3', 'JPH4', 'GPR162', 'RIMS4', 'MAP2', 'FEZ1', 'ZIC1', 'CTNNA2', 'ASTN1']	ARCHS4 (coexpressed genes)	upregulated
ETV1_human_tf_ARCHS4_coexpression	-1.4738	12.5212	0.00550413	0.000204311	['NLGN3', 'CADM3', 'TTYH1', 'NXPH3', 'CADM2', 'PLEKHB1', 'TMEM59L', 'NRXN2', 'CEND1', 'SYP', 'CPLX2', 'CLIP3', 'JPH4', 'MAP2', 'FEZ1', 'SMOC1', 'ZIC1', 'BAALC', 'ASTN1']	ARCHS4 (coexpressed genes)	upregulated
ZNF488_human_tf_ARCHS4_coexpression	-1.49757	12.7231	0.00550413	0.000204311	['CCL25', 'CA11', 'CADM3', 'TMEM151B', 'UNC5A', 'NXPH3', 'PLEKHB1', 'TMEM59L', 'NRXN2', 'CEND1', 'SYP', 'CPLX2', 'HPCAL4', 'CLIP3', 'JPH4', 'RIMS4', 'XPNPEP2', 'CERCAM', 'NPTX1']	ARCHS4 (coexpressed genes)	upregulated
MEIS3_human_tf_ARCHS4_coexpression	-1.55898	13.2449	0.00550413	0.000204311	['CA11', 'CADM3', 'TMEM59L', 'NRXN2', 'SYP', 'CLIP3', 'JPH4', 'RIMS4', 'OLFM2', 'PCSK1N', 'HRH3', 'MAP2', 'FEZ1', 'ZIC1', 'MAP6', 'CTNNA2', 'PRR36', 'ASTN1', 'LRRC4B']	ARCHS4 (coexpressed genes)	upregulated
REST_MCF-7_hg19	-1.76967	19.0204	0.00858454	2.14882e-05	['BARHL1', 'PCSK2', 'SERPINA3', 'TMEM151B', 'CLEC10A', 'DBX1', 'SEZ6', 'CPZ', 'CPLX2', 'CST6', 'SCRT2', 'SCGN', 'SIX6', 'HRH3', 'TRIM4', 'CAMK2N2', 'SPTSSB', 'CTNNA2', 'HES3', 'DRD3', 'LRRC24', 'LAMB3', 'EGR4', 'HTR1A', 'VSTM2L', 'SYP', 'PDCD1LG2', 'HBA1', 'HPCAL4', 'MARCH4', 'HS3ST2', 'APLN', 'ADCYAP1', 'VGF', 'PLSCR5', 'CNTN2']	ENCODE (experimentally validated targets)	upregulated
REST_HCT116_hg19	-1.80777	18.2123	0.011224	4.21425e-05	['BARHL1', 'PCSK2', 'CLEC10A', 'DBX1', 'SEZ6', 'CPLX2', 'CST6', 'SCRT2', 'SCGN', 'HRH3', 'TRIM4', 'CAMK2N2', 'CTNNA2', 'HES3', 'DRD3', 'LRRC24', 'HTR1A', 'VSTM2L', 'SYP', 'HBA1', 'MARCH4', 'HS3ST2', 'ADCYAP1', 'VGF', 'CNTN2']	ENCODE (experimentally validated targets)	upregulated
KLF5_human_tf_ARCHS4_coexpression	-1.47951	11.0593	0.0134015	0.000567102	['CCL25', 'COL17A1', 'ITGB4', 'TACSTD2', 'IL22RA1', 'SCEL', 'CLDN4', 'GJB2', 'CLDN3', 'GJB3', 'TRIM29', 'XPNPEP2', 'DUOXA1', 'AGR2', 'LY6D', 'AGR3', 'ANXA8', 'GBP3']	ARCHS4 (coexpressed genes)	upregulated
TRIM3_human_tf_ARCHS4_coexpression	-1.50192	11.2268	0.0134015	0.000567102	['CA11', 'CADM3', 'TMEM151B', 'UNC5A', 'NXPH3', 'TMEM59L', 'NRXN2', 'CEND1', 'SYP', 'CPLX2', 'HPCAL4', 'CLIP3', 'JPH4', 'GPR162', 'PCSK1N', 'CAMK2N1', 'GALNT9', 'PRR36']	ARCHS4 (coexpressed genes)	upregulated
ZBTB7C_human_tf_ARCHS4_coexpression	-1.53516	11.4752	0.0134015	0.000567102	['STOML3', 'C2ORF40', 'TMEM190', 'TACSTD2', 'CST6', 'KCNE1B', 'ALDH3B2', 'CLDN4', 'CLDN3', 'KIF19', 'MORN5', 'TRIM29', 'DUOXA1', 'C10ORF107', 'AGR2', 'LY6D', 'AGR3', 'LY6G6C']	ARCHS4 (coexpressed genes)	upregulated
TBR1_human_tf_ARCHS4_coexpression	-1.6437	12.2866	0.0134015	0.000567102	['TMEM59L', 'SYP', 'CLIP3', 'JPH4', 'GNG3', 'ADGRG1', 'LHX2', 'MAP2', 'CAMK2N2', 'GNG8', 'BAALC', 'MAP6', 'LHX5', 'CTNNA2', 'LY6H', 'FEZF1', 'GALNT9', 'LRRC4B']	ARCHS4 (coexpressed genes)	upregulated
NPAS3_human_tf_ARCHS4_coexpression	-1.46512	10.9517	0.0134015	0.000567102	['NLGN3', 'CADM3', 'LUZP2', 'TTYH1', 'CADM2', 'NRXN2', 'POU3F4', 'GRM3', 'CLIP3', 'ADGRG1', 'SOX1', 'MAP2', 'FEZ1', 'SMOC1', 'ZIC1', 'ID4', 'CTNNA2', 'ASTN1']	ARCHS4 (coexpressed genes)	upregulated
NR1D1_human_tf_ARCHS4_coexpression	-1.42389	10.6435	0.0134015	0.000567102	['CA11', 'CADM3', 'TMEM151B', 'UNC5A', 'NXPH3', 'PLEKHB1', 'NRXN2', 'CEND1', 'SYP', 'CPLX2', 'HPCAL4', 'CUZD1', 'IL22RA1', 'CLIP3', 'EEF1A2', 'CDH22', 'NPTX1', 'SPRR2A']	ARCHS4 (coexpressed genes)	upregulated
RARG_human_tf_ARCHS4_coexpression	-1.47662	11.0377	0.0134015	0.000567102	['COL17A1', 'CDSN', 'TACSTD2', 'EMP1', 'KRT5', 'XG', 'EPN3', 'ALDH3B2', 'GJB2', 'KRT17', 'GJB3', 'TRIM29', 'KRT14', 'LY6D', 'ANXA8', 'MFGE8', 'SPRR1B', 'IVL']	ARCHS4 (coexpressed genes)	upregulated
PITX1_human_tf_ARCHS4_coexpression	-1.64548	10.712	0.0299262	0.00148853	['SPRR3', 'NOG', 'TACSTD2', 'KRT13', 'EMP1', 'EPN3', 'MTND4LP30', 'SCEL', 'GJB2', 'TRIM29', 'DUOXA1', 'LY6D', 'ANXA8', 'RHCG', 'SPRR2A', 'SPRR1B', 'IVL']	ARCHS4 (coexpressed genes)	upregulated
ZNF25_human_tf_ARCHS4_coexpression	-1.53939	10.0213	0.0299262	0.00148853	['CADM3', 'CADM2', 'HTR1F', 'TMEM59L', 'SLC4A10', 'NRXN2', 'SYP', 'HPCAL4', 'CLIP3', 'JPH4', 'PCSK1N', 'GNG3', 'MAP2', 'FEZ1', 'CTNNA2', 'LY6H', 'ASTN1']	ARCHS4 (coexpressed genes)	upregulated
HOPX_human_tf_ARCHS4_coexpression	-1.49933	9.76056	0.0299262	0.00148853	['PGLYRP4', 'SPRR3', 'RPL21P134', 'CDSN', 'GZMA', 'KRT13', 'CD3D', 'TRIM29', 'DUOXA1', 'TRBC2', 'LY6D', 'IL36RN', 'LY6G6C', 'LTB', 'RHCG', 'SPRR1B', 'IVL']	ARCHS4 (coexpressed genes)	upregulated
TFAP2A_human_tf_ARCHS4_coexpression	-1.4778	9.62041	0.0299262	0.00148853	['COL17A1', 'PGLYRP4', 'C5ORF46', 'LAMB3', 'TACSTD2', 'EMP1', 'GATA3', 'VTCN1', 'XG', 'ALDH3B2', 'GJB2', 'KRT17', 'GJB3', 'TRIM29', 'ANXA8', 'LY6G6C', 'SLC24A5']	ARCHS4 (coexpressed genes)	upregulated
FOXE1_human_tf_ARCHS4_coexpression	-1.47609	9.60929	0.0299262	0.00148853	['CLIC3', 'TACSTD2', 'KRT13', 'KRT7', 'EMP1', 'PKD1P5', 'KRT5', 'SCEL', 'IGHG1', 'KRT17', 'FNDC1', 'TRIM29', 'DUOXA1', 'ID4', 'LY6D', 'ANXA8', 'KRT6A']	ARCHS4 (coexpressed genes)	upregulated
IGHM_human_tf_ARCHS4_coexpression	-1.45135	9.44826	0.0299262	0.00148853	['CD74', 'IGHV3-23', 'IGKV1-5', 'CXCR5', 'JCHAIN', 'IGHG3', 'IGLL5', 'CH17-60O17.5', 'IGHG1', 'IGKC', 'IGLV3-21', 'IGHGP', 'BLNK', 'IGLC3', 'IGKV4-1', 'IGKV3-11', 'IGKV3-20']	ARCHS4 (coexpressed genes)	upregulated
SOX1_human_tf_ARCHS4_coexpression	-1.42556	9.28032	0.0299262	0.00148853	['NLGN3', 'BTBD17', 'TTYH1', 'WNT7B', 'POU3F4', 'TMEM221', 'MAP2', 'FEZ1', 'SMOC1', 'ZIC1', 'SIX3', 'ID4', 'MAP6', 'FAM181A', 'HES5', 'PRR36', 'LRRC4B']	ARCHS4 (coexpressed genes)	upregulated
CUX2_human_tf_ARCHS4_coexpression	-1.4215	9.2539	0.0299262	0.00148853	['CA11', 'CADM3', 'TMEM151B', 'UNC5A', 'CADM2', 'TMEM59L', 'NRXN2', 'SYP', 'HPCAL4', 'ADRA2A', 'CLIP3', 'JPH4', 'RIMS4', 'MAP2', 'CTNNA2', 'PRR36', 'ASTN1']	ARCHS4 (coexpressed genes)	upregulated
RORB_human_tf_ARCHS4_coexpression	-1.41265	9.19627	0.0299262	0.00148853	['CA11', 'CADM3', 'C11ORF87', 'CADM2', 'TMEM59L', 'SLC4A10', 'CEND1', 'SYP', 'CPLX2', 'HPCAL4', 'CLIP3', 'JPH4', 'CAMK2N1', 'MAP2', 'CTNNA2', 'FEZF1', 'ASTN1']	ARCHS4 (coexpressed genes)	upregulated
SLC4A10_human_tf_ARCHS4_coexpression	-1.41231	9.19411	0.0299262	0.00148853	['CA11', 'CADM3', 'C11ORF87', 'TMEM151B', 'UNC5A', 'CADM2', 'TMEM59L', 'CEND1', 'SYP', 'CPLX2', 'HPCAL4', 'CLIP3', 'JPH4', 'TCEAL6', 'CAMK2N1', 'MAP2', 'CTNNA2']	ARCHS4 (coexpressed genes)	upregulated

## Sheet: vs AMIQ hESC-iMEF
term_name	zscore	combined_score	FDR	pvalue	overlapping_genes	gene_set_library	log10P	geneset
ESRRB human tf ARCHS4 coexpression	21.7918	3856.1	2.09659e-74	1.4147e-77	['RP4-580O19.2', 'C1QBPP2', 'EIF2S2P3', 'RANP4', 'RPLP0P6', 'ATP5G2P1', 'CTD-2122P11.1', 'ATP5BP1', 'RPL10L', 'AF131215.1', 'NPM1P8', 'RP11-305L7.5', 'HSP90AB6P', 'RPS4XP21', 'EIF4A1P6', 'RPS3AP22', 'RP11-307I14.2', 'RPS15AP9', 'RP11-214N15.5', 'EEF1A1P10', 'RPL7AP38', 'RPL17P20', 'RP11-481K9.4', 'EEF1A1P12', 'VDAC1P2', 'RP6-218J18.2', 'RP11-166J22.1', 'EEF1A1P15', 'CTD-2061E19.1', 'EEF1A1P16', '…	ARCHS4 (coexpressed genes)	76.8493	downregulated
ZNF625 human tf ARCHS4 coexpression	13.1302	1353.96	1.2198e-42	1.64615e-45	['MTND5P10', 'RP4-580O19.2', 'RANP4', 'ATP5G2P1', 'ATP5BP1', 'RPL10L', 'AF131215.1', 'NPM1P8', 'RP11-305L7.5', 'RPL34P33', 'RPS4XP21', 'RP11-538P18.1', 'RPS3AP22', 'RP11-307I14.2', 'CTD-2538A21.1', 'RPS15AP9', 'VDAC1P10', 'RP11-85G20.2', 'RPL17P20', 'RP11-481K9.4', 'EEF1A1P12', 'VDAC1P2', 'RP6-218J18.2', 'CTD-2061E19.1', 'RP11-343B5.1', 'RP11-388B24.4', 'RPS4XP17', 'RP5-837J1.1', 'RP11-52I18.1', …	ARCHS4 (coexpressed genes)	44.7835	downregulated
NKX6-3 human tf ARCHS4 coexpression	12.851	1292.13	1.0628e-41	2.15142e-44	['RP4-580O19.2', 'C1QBPP2', 'RANP4', 'ATP5G2P1', 'ATP5BP1', 'RPL10L', 'AF131215.1', 'NPM1P8', 'RP11-305L7.5', 'RPS4XP21', 'EIF4A1P6', 'RP11-307I14.2', 'RPS15AP9', 'RPL7AP38', 'RP11-481K9.4', 'EEF1A1P12', 'VDAC1P2', 'RP11-166J22.1', 'CTD-2061E19.1', 'RP11-343B5.1', 'RP11-388B24.4', 'PKMP2', 'RPS4XP6', 'RP5-837J1.1', 'RP3-486I3.4', 'NCLP2', 'RPS17P2', 'RP11-389O22.4', 'RPL7P5', 'NPM1P43', 'COX5BP1'…	ARCHS4 (coexpressed genes)	43.6673	downregulated
SUZ12 18692474 ChIP-Seq MESCs Mouse	4.63683	457.599	5.00253e-41	1.38157e-43	['SEMA5B', 'VIPR2', 'HHIP', 'RAX', 'SOX21', 'CDH6', 'DACH1', 'SOX1', 'DPYSL5', 'DUOXA1', 'CYP1B1', 'NRCAM', 'SOX9', 'PKNOX2', 'LMO1', 'EPHA4', 'IGFBP5', 'MSX2', 'SLC30A2', 'OSR1', 'WNT5A', 'EBF4', 'POU3F1', 'DKK1', 'POU3F2', 'RUNX1', 'POU3F4', 'NPAS4', 'SFRP1', 'MAF', 'LMX1A', 'PAPPA', 'ADAM12', 'PKP1', 'RHCG', 'DGKI', 'FBN2', 'COL13A1', 'KLHL14', 'EPAS1', 'RRAD', 'CABP7', 'HTRA3', 'NPR3', 'ALOX1…	ChEA (experimentally validated targets)	42.8596	upregulated
SUZ12 18974828 ChIP-Seq MESCs Mouse	4.61052	454.411	5.00253e-41	1.57065e-43	['FHOD3', 'SEMA5B', 'RAX', 'SOX21', 'CDH6', 'DACH1', 'SOX1', 'DPYSL5', 'PLAU', 'DUOXA1', 'CYP1B1', 'SOX9', 'PKNOX2', 'LMO1', 'EPHA4', 'IGFBP5', 'MSX2', 'SLC30A2', 'IGFBP3', 'OSR1', 'WNT5A', 'EBF4', 'POU3F1', 'DKK1', 'POU3F2', 'RUNX1', 'POU3F4', 'MAF', 'LMX1A', 'PAPPA', 'ADAM12', 'PKP1', 'DGKI', 'FBN2', 'COL13A1', 'KLHL14', 'EPAS1', 'RRAD', 'CABP7', 'NPR3', 'ALOX15', 'LYPD1', 'TACSTD2', 'GLIS3', '…	ChEA (experimentally validated targets)	42.8039	upregulated
SUZ12 18692474 ChIP-Seq MEFs Mouse	5.27924	454.209	9.15637e-36	4.31226e-38	['SEMA5B', 'VIPR2', 'HHIP', 'RAX', 'CDH6', 'DACH1', 'SOX1', 'DPYSL5', 'CYP1B1', 'SOX9', 'EPHA4', 'IGFBP5', 'MSX2', 'OSR1', 'WNT5A', 'POU3F1', 'DKK1', 'POU3F2', 'RUNX1', 'POU3F4', 'SFRP1', 'MAF', 'PAPPA', 'ADAM12', 'PKP1', 'RHCG', 'FBN2', 'COL13A1', 'EPAS1', 'RRAD', 'NPR3', 'ALOX15', 'TACSTD2', 'LTBP2', 'GATA3', 'WNT6', 'OTX2', 'NPTX1', 'OTX1', 'NKX6-1', 'DRD2', 'DRD4', 'WNT4', 'WNT10A', 'TGFB2', …	ChEA (experimentally validated targets)	37.3653	upregulated
MTF2 20144788 ChIP-Seq MESCs Mouse	3.60438	298.301	1.77267e-34	1.14169e-36	['FHOD3', 'SEMA5B', 'VIPR2', 'HHIP', 'RAX', 'SOX21', 'CDH6', 'DACH1', 'SOX1', 'ANPEP', 'HMCN2', 'CYP1B1', 'NRCAM', 'SOX9', 'CCDC92', 'BAHCC1', 'PKNOX2', 'LMO1', 'EPHA4', 'IGFBP5', 'MSX2', 'SLC30A2', 'IGFBP3', 'OSR1', 'WNT5A', 'EBF4', 'SHISA2', 'POU3F1', 'DKK1', 'POU3F2', 'RUNX1', 'POU3F4', 'SFRP1', 'MAF', 'LMX1A', 'FEZ1', 'PAPPA', 'ADAM12', 'PKP1', 'KANK4', 'DGKI', 'CFTR', 'ASTN1', 'FBLN7', 'FBN2…	ChEA (experimentally validated targets)	35.9425	upregulated
JARID2 20064375 ChIP-Seq MESCs Mouse	5.17972	427.652	1.77267e-34	1.39142e-36	['SEMA5B', 'RAX', 'SOX21', 'CDH6', 'DACH1', 'SOX1', 'CYP1B1', 'SOX9', 'CCDC92', 'PKNOX2', 'IGFBP5', 'MSX2', 'WNT5A', 'POU3F1', 'POU3F2', 'SFRP1', 'MAF', 'LMX1A', 'PAPPA', 'ADAM12', 'PKP1', 'DGKI', 'NECAB2', 'FBN2', 'KLHL14', 'CABP7', 'NPR3', 'LYPD1', 'TACSTD2', 'GLIS3', 'LIN7A', 'GATA3', 'WNT6', 'CDH23', 'ST8SIA6', 'NPTX1', 'OTX1', 'RHBDL3', 'NKX6-1', 'DRD4', 'WNT10A', 'TGFB2', 'FZD2', 'TMEM132E'…	ChEA (experimentally validated targets)	35.8565	upregulated
RNF2 27304074 Chip-Seq ESCs Mouse	4.51018	360.219	2.18694e-33	2.05991e-35	['HPSE2', 'RAX', 'SOX21', 'CDH6', 'DACH1', 'SOX1', 'DPYSL5', 'CYP1B1', 'NRCAM', 'SOX9', 'BAHCC1', 'PKNOX2', 'LMO1', 'IGFBP5', 'MSX2', 'IGFBP3', 'OSR1', 'WNT5A', 'SOX14', 'SHISA2', 'POU3F1', 'SRCIN1', 'RUNX1', 'LMX1A', 'PAPPA', 'ADAM12', 'PKP1', 'NECAB2', 'PKDCC', 'COL13A1', 'EPAS1', 'CABP7', 'NPR3', 'LYPD1', 'TACSTD2', 'ILDR2', 'LIN7A', 'LTBP2', 'WNT6', 'CDH23', 'ST8SIA6', 'NPTX1', 'OTX1', 'RHBDL…	ChEA (experimentally validated targets)	34.6862	upregulated
RNF2 18974828 ChIP-Seq MESCs Mouse	4.72145	374.569	2.79871e-33	3.51486e-35	['SEMA5B', 'HHIP', 'RAX', 'SOX21', 'DACH1', 'SOX1', 'DPYSL5', 'PLAU', 'CYP1B1', 'SOX9', 'STK32A', 'PKNOX2', 'EPHA4', 'IGFBP5', 'MSX2', 'OSR1', 'WNT5A', 'EBF4', 'POU3F1', 'POU3F2', 'RUNX1', 'SFRP1', 'MAF', 'LMX1A', 'PAPPA', 'ADAM12', 'PKP1', 'FBN2', 'COL13A1', 'KLHL14', 'NPR3', 'LYPD1', 'TACSTD2', 'GLIS3', 'LIN7A', 'LTBP2', 'GATA3', 'WNT6', 'ST8SIA6', 'OTX2', 'NPTX1', 'OTX1', 'RHBDL3', 'NKX6-1', '…	ChEA (experimentally validated targets)	34.4541	upregulated
EZH2 18974828 ChIP-Seq MESCs Mouse	4.72145	374.569	2.79871e-33	3.51486e-35	['SEMA5B', 'HHIP', 'RAX', 'SOX21', 'DACH1', 'SOX1', 'DPYSL5', 'PLAU', 'CYP1B1', 'SOX9', 'STK32A', 'PKNOX2', 'EPHA4', 'IGFBP5', 'MSX2', 'OSR1', 'WNT5A', 'EBF4', 'POU3F1', 'POU3F2', 'RUNX1', 'SFRP1', 'MAF', 'LMX1A', 'PAPPA', 'ADAM12', 'PKP1', 'FBN2', 'COL13A1', 'KLHL14', 'NPR3', 'LYPD1', 'TACSTD2', 'GLIS3', 'LIN7A', 'LTBP2', 'GATA3', 'WNT6', 'ST8SIA6', 'OTX2', 'NPTX1', 'OTX1', 'RHBDL3', 'NKX6-1', '…	ChEA (experimentally validated targets)	34.4541	upregulated
JARID2 20075857 ChIP-Seq MESCs Mouse	4.68076	357.402	4.88815e-32	6.90633e-34	['SEMA5B', 'HPSE2', 'RAX', 'SOX21', 'CDH6', 'DACH1', 'SOX1', 'CYP1B1', 'SOX9', 'PKNOX2', 'IGFBP5', 'MSX2', 'OSR1', 'WNT5A', 'SOX14', 'POU3F1', 'POU3F2', 'RUNX1', 'MAF', 'LMX1A', 'PAPPA', 'PKP1', 'ODF3B', 'DGKI', 'FBN2', 'PKDCC', 'EPAS1', 'RRAD', 'NPR3', 'LYPD1', 'GLIS3', 'LIN7A', 'LTBP2', 'GATA3', 'WNT6', 'ST8SIA6', 'NPTX1', 'OTX1', 'NKX6-1', 'DRD4', 'WNT4', 'TMEM132C', 'WNT10A', 'FZD2', 'TMEM132…	ChEA (experimentally validated targets)	33.1608	upregulated
SUZ12 20075857 ChIP-Seq MESCs Mouse	3.14768	238.96	6.82536e-32	1.07148e-33	['VIPR2', 'HPSE2', 'HHIP', 'RAX', 'SOX21', 'NIPAL4', 'SOX1', 'DPYSL5', 'TRIM29', 'CYP1B1', 'SOX9', 'CCDC92', 'PKNOX2', 'SOX14', 'KRT7', 'EBF4', 'DKK1', 'RUNX1', 'GPR162', 'SFRP1', 'CRISPLD2', 'CLDN9', 'PAPPA', 'CFTR', 'ASTN1', 'NECAB2', 'COL13A1', 'EPAS1', 'RRAD', 'LYPD1', 'GATA3', 'ST8SIA6', 'RHBDL3', 'WNT10A', 'FZD2', 'BTBD17', 'NR2F1', 'IGF2', 'CIDEB', 'MICAL2', 'NR2F2', 'FOSL2', 'CYP26A1', 'I…	ChEA (experimentally validated targets)	32.97	upregulated
SUZ12 27294783 Chip-Seq ESCs Mouse	3.61111	239.909	8.12304e-28	1.40272e-29	['SEMA5B', 'HPSE2', 'GPR68', 'RAX', 'SOX21', 'CDH6', 'NIPAL4', 'DACH1', 'SOX1', 'DPYSL5', 'ANPEP', 'CYP1B1', 'SOX9', 'BAHCC1', 'PKNOX2', 'LMO1', 'IGFBP5', 'MSX2', 'IL1R1', 'IGFBP3', 'OSR1', 'WNT5A', 'SOX14', 'SHISA2', 'POU3F1', 'POU3F2', 'NPAS4', 'MAF', 'LMX1A', 'CRISPLD2', 'ADAM12', 'PKP1', 'ERP27', 'CFTR', 'PKDCC', 'CRABP2', 'KLHL14', 'EPAS1', 'NPR3', 'LYPD1', 'TACSTD2', 'ILDR2', 'LIN7A', 'GATA…	ChEA (experimentally validated targets)	28.853	upregulated
EZH2 27304074 Chip-Seq ESCs Mouse	4.86201	304.693	3.22549e-26	6.07628e-28	['PTPRT', 'SEMA5B', 'NRP2', 'PCDHGB6', 'HPSE2', 'BNC1', 'CITED2', 'RAX', 'SOX21', 'JPH2', 'CYP26B1', 'DACH1', 'SOX1', 'ZIC2', 'LRRTM1', 'ZIC1', 'RSPO2', 'SOX9', 'FEZF2', 'FEZF1', 'PKNOX2', 'LMO1', 'IGFBP5', 'OLIG3', 'OSR1', 'NOG', 'WNT5A', 'SOX14', 'PAX3', 'PAX6', 'POU3F1', 'POU3F2', 'SFRP1', 'COL2A1', 'LMX1A', 'HAND1', 'FAM84A', 'PKP1', 'SCN4B', 'HMX2', 'FBN2', 'FOXC2', 'FOXC1', 'TNXB', 'KLHL14'…	ChEA (experimentally validated targets)	27.2164	upregulated
SUZ12 18555785 ChIP-Seq MESCs Mouse	4.45185	275.524	6.48314e-26	1.32309e-27	['PTPRT', 'MOXD1', 'NRP2', 'BNC1', 'LOXL2', 'CDH6', 'GRM3', 'THBD', 'SOX1', 'ZIC2', 'DUOXA1', 'BOC', 'ZIC1', 'SOX9', 'FEZF2', 'PKNOX2', 'EDN1', 'PRMT8', 'IGFBP5', 'EDN3', 'MSX2', 'OLIG3', 'TRPC4', 'IGFBP3', 'OSR1', 'NOG', 'PAX3', 'FOXL1', 'DKK1', 'SORCS2', 'POU3F4', 'ARL4C', 'GREM1', 'MN1', 'COL2A1', 'MAF', 'HAND1', 'GAS1', 'PKP1', 'DGKI', 'FBN2', 'TNXB', 'COL13A1', 'EPAS1', 'RRAD', 'KCNA1', 'NPR…	ChEA (experimentally validated targets)	26.8784	upregulated
SUZ12 16625203 ChIP-ChIP MESCs Mouse	4.07577	247.474	1.94256e-25	4.26937e-27	['SEMA5B', 'HHIP', 'RAX', 'SOX21', 'DACH1', 'DPYSL5', 'CYP1B1', 'SOX9', 'LMO1', 'IGFBP5', 'MSX2', 'SLC30A2', 'OSR1', 'WNT5A', 'EBF4', 'DKK1', 'POU3F2', 'POU3F4', 'NPAS4', 'SFRP1', 'LMX1A', 'PKP1', 'FBN2', 'EPAS1', 'CABP7', 'NPR3', 'ALOX15', 'TACSTD2', 'LTBP2', 'GATA3', 'WNT6', 'CDH20', 'ST8SIA6', 'OTX2', 'NPTX1', 'OTX1', 'NKX6-1', 'SLC38A3', 'DRD4', 'WNT10A', 'TGFB2', 'FZD2', 'IGF2', 'NR2F2', 'CY…	ChEA (experimentally validated targets)	26.3696	upregulated
EZH2 27294783 Chip-Seq ESCs Mouse	3.34898	193.122	3.83722e-24	9.03585e-26	['SEMA5B', 'HPSE2', 'GPR68', 'RAX', 'SOX21', 'NIPAL4', 'DACH1', 'SOX1', 'DUOXA1', 'CYP1B1', 'NRCAM', 'SOX9', 'PKNOX2', 'WLS', 'LMO1', 'IGFBP5', 'IGFBP3', 'OSR1', 'WNT5A', 'SOX14', 'PDYN', 'POU3F2', 'TM4SF1', 'NPAS4', 'MAF', 'LMX1A', 'PAPPA', 'ODF3B', 'FBLN7', 'FBN2', 'COL13A1', 'KLHL14', 'EPAS1', 'CABP7', 'ALOX15', 'LYPD1', 'TACSTD2', 'GLIS3', 'LIN7A', 'GATA3', 'WNT6', 'CDH20', 'CDH23', 'NPTX1', …	ChEA (experimentally validated targets)	25.044	upregulated
SUZ12 NT2-D1 hg19	5.92857	355.883	6.87732e-24	8.51153e-27	['PTPRT', 'HPSE2', 'BNC1', 'CYP26B1', 'SOX1', 'SIX3', 'ZIC1', 'RSPO2', 'RSPO3', 'FEZF2', 'FEZF1', 'BAHCC1', 'PRMT8', 'EDN3', 'OLIG3', 'SLC30A2', 'IGFBP3', 'OSR1', 'LMO3', 'SOX14', 'PAX3', 'PAX6', 'FOXL1', 'POU3F2', 'NPAS4', 'GREM1', 'SFRP1', 'COL2A1', 'LMX1A', 'HAND1', 'MGLL', 'HMX2', 'ASTN1', 'DSC3', 'FOXC2', 'EPAS1', 'CABP7', 'KCNA1', 'PAPLN', 'NPR3', 'GLIS3', 'ILDR2', 'LRP2', 'PTHLH', 'NTF3', …	ENCODE (experimentally validated targets)	26.07	upregulated
RING1B 27294783 Chip-Seq ESCs Mouse	3.13333	158.452	4.34383e-21	1.09107e-22	['SEMA5B', 'VIPR2', 'HPSE2', 'RAX', 'SOX21', 'CDH6', 'SOX1', 'DPYSL5', 'FAM198B', 'CYP1B1', 'BAALC', 'NRCAM', 'SOX9', 'BAHCC1', 'PKNOX2', 'LMO1', 'EPHA4', 'IGFBP5', 'MSX2', 'IGFBP3', 'OSR1', 'WNT5A', 'SOX14', 'SHISA2', 'POU3F1', 'MAF', 'LMX1A', 'PKP1', 'COL17A1', 'FBN2', 'COL13A1', 'KLHL14', 'EPAS1', 'CABP7', 'NPR3', 'LYPD1', 'TACSTD2', 'ILDR2', 'DAPP1', 'LIN7A', 'CUZD1', 'NID2', 'SCUBE3', 'WNT6'…	ChEA (experimentally validated targets)	21.9621	upregulated
EED 16625203 ChIP-ChIP MESCs Mouse	4.2329	198.997	1.4345e-19	3.82835e-21	['PTPRT', 'SEMA5B', 'NRP2', 'PCDHGB6', 'PCDHGB5', 'PTPRO', 'RAX', 'LRRC4', 'SOX21', 'THBD', 'DACH1', 'LRRTM1', 'BOC', 'SIX3', 'ZIC1', 'CYP1B1', 'SOX9', 'IGFBP5', 'MSX2', 'OLIG3', 'OSR1', 'NOG', 'WNT5A', 'PAX3', 'PAX6', 'EBF4', 'SEZ6L', 'DKK1', 'POU3F2', 'POU3F4', 'COL2A1', 'LMX1A', 'HAND1', 'PKP1', 'FBN2', 'FOXC2', 'FOXC1', 'TNXB', 'EPAS1', 'KCNA1', 'LEF1', 'SEZ6', 'TACSTD2', 'LTBP2', 'GATA3', 'D…	ChEA (experimentally validated targets)	20.417	upregulated
RNF2 16625203 ChIP-ChIP MESCs Mouse	3.4181	145.005	1.33318e-17	3.76722e-19	['PTPRT', 'SEMA5B', 'MOXD1', 'NRP2', 'PCDHGB6', 'PCDHGB5', 'HHIP', 'RAX', 'SOX21', 'THBD', 'DACH1', 'ZIC2', 'DPYSL5', 'LRRTM1', 'BOC', 'SIX3', 'ZIC1', 'CYP1B1', 'SOX9', 'LMO1', 'EDN1', 'IGFBP5', 'MSX2', 'OLIG3', 'TRPC4', 'SLC30A2', 'OSR1', 'TNFRSF19', 'WNT5A', 'PAX3', 'PAX6', 'EBF4', 'PDYN', 'SEZ6L', 'DKK1', 'POU3F2', 'POU3F4', 'SFRP1', 'COL2A1', 'LMX1A', 'HAND1', 'PKP1', 'FBN2', 'FOXC2', 'FOXC1'…	ChEA (experimentally validated targets)	18.424	upregulated
TP53 20018659 ChIP-ChIP R1E Mouse	3.48206	143.881	3.80195e-17	1.13402e-18	['LGALS3BP', 'SEMA5B', 'PCDHGB6', 'RAX', 'SOX21', 'TGM1', 'JPH2', 'DACH1', 'ZIC2', 'LRRTM1', 'ENC1', 'SIX3', 'ZIC1', 'CYP1B1', 'RSPO3', 'ANXA8', 'SOX9', 'FEZF2', 'PKNOX2', 'IGFBP5', 'MSX2', 'OLIG3', 'OSR1', 'TNFRSF19', 'NOG', 'WNT5A', 'PAX3', 'PAX6', 'FOXL1', 'KRT5', 'COX6B2', 'SEZ6L', 'POU3F1', 'POU3F2', 'RUNX1', 'GREM1', 'COL2A1', 'LMX1A', 'PAPPA', 'HAND1', 'PKP1', 'SCN4B', 'FBN2', 'FOXC2', 'FO…	ChEA (experimentally validated targets)	17.9454	upregulated
BMI1 23680149 ChIP-Seq NPCS Mouse	3.55764	146.316	4.38232e-17	1.37592e-18	['HPSE2', 'BNC1', 'RAX', 'LOXL2', 'CDH6', 'DACH1', 'SOX1', 'ZIC2', 'LRRTM1', 'SIX3', 'ZIC1', 'RSPO2', 'RSPO3', 'FGFBP3', 'FEZF2', 'FEZF1', 'EDN1', 'IGFBP5', 'MSX2', 'OLIG3', 'OSR1', 'NOG', 'SOX14', 'EMP1', 'PAX3', 'FOXL1', 'POU3F1', 'DKK1', 'TM4SF1', 'NPAS4', 'GREM1', 'COL2A1', 'MAF', 'LMX1A', 'PAPPA', 'HAND1', 'PKP1', 'ODF3B', 'SCN4B', 'HMX2', 'FOXC2', 'FOXC1', 'SEMA3C', 'KCNA1', 'LEF1', 'NPR3',…	ChEA (experimentally validated targets)	17.8614	upregulated
SNAI2 human tf ARCHS4 coexpression	6.86631	301.373	1.30268e-16	8.67299e-20	['COL17A1', 'FOXC2', 'ANXA8L1', 'COL16A1', 'BNC1', 'HTRA3', 'LAMA3', 'LTBP2', 'NID2', 'PTHLH', 'LOXL2', 'CTGF', 'NT5E', 'ANXA8', 'PAMR1', 'GALNT5', 'LAMB3', 'IL1R1', 'WNT5A', 'FN1', 'MICAL2', 'SSC5D', 'KRT5', 'FOXL1', 'TBX18', 'COL1A1', 'GREM1', 'MFAP5', 'COL3A1', 'CCDC80', 'COL1A2', 'COL5A1', 'GJB3', 'PALLD', 'KRT14', 'ITGA11', 'TMEM119', 'ITGBL1', 'GAS1', 'CSPG4', 'AC090094.1', 'TGFBI']	ARCHS4 (coexpressed genes)	19.0618	upregulated
RING1B 27294783 Chip-Seq NPCs Mouse	2.72539	102.447	1.43482e-15	4.73018e-17	['HPSE2', 'RAX', 'SOX21', 'DACH1', 'SOX1', 'CYP1B1', 'NRCAM', 'SOX9', 'BAHCC1', 'PKNOX2', 'TGM2', 'LMO1', 'EPHA4', 'IGFBP5', 'MSX2', 'IGFBP3', 'OSR1', 'WNT5A', 'SOX14', 'POU3F1', 'SRCIN1', 'POU3F2', 'MAF', 'LMX1A', 'FEZ1', 'PAPPA', 'PKP1', 'KLHL14', 'NPR3', 'LYPD1', 'GLIS3', 'ILDR2', 'GATA3', 'NID2', 'SCUBE3', 'WNT6', 'FLRT3', 'HESX1', 'CDH23', 'OTX2', 'NPTX1', 'OTX1', 'NKX6-1', 'WNT10A', 'TGFB2'…	ChEA (experimentally validated targets)	16.3251	upregulated
CBX2 27304074 Chip-Seq ESCs Mouse	3.67924	134.924	3.43076e-15	1.18488e-16	['SEMA5B', 'HPSE2', 'CITED2', 'RAX', 'SOX21', 'CYP26B1', 'SOX1', 'ZIC2', 'ZIC1', 'SOX9', 'FEZF2', 'FEZF1', 'BAHCC1', 'PKNOX2', 'IGFBP5', 'MSX2', 'OSR1', 'NOG', 'WNT5A', 'SOX14', 'PAX3', 'FOXL1', 'POU3F1', 'POU3F2', 'POU3F4', 'MN1', 'COL2A1', 'MAF', 'LMX1A', 'PAPPA', 'DSG3', 'HMX2', 'FOXC2', 'FOXC1', 'PKDCC', 'SEMA3C', 'LUZP2', 'EPAS1', 'KCNA1', 'LEF1', 'GATA3', 'WNT6', 'OTX2', 'NPTX1', 'MSX1', 'O…	ChEA (experimentally validated targets)	15.9263	upregulated
OSR1 human tf ARCHS4 coexpression	6.2603	239.176	9.6015e-15	2.55699e-17	['MOXD1', 'ECM1', 'TNXB', 'COL16A1', 'PKDCC', 'NNMT', 'PCDHGB5', 'CPXM2', 'HTRA3', 'LRRC17', 'LTBP2', 'PRSS23', 'NID2', 'LOXL2', 'THBS3', 'NT5E', 'PAMR1', 'GALNT5', 'IGFBP5', 'IL1R1', 'FN1', 'EMP1', 'SSC5D', 'TBX18', 'COL1A1', 'GREM1', 'MFAP5', 'COL3A1', 'CCDC80', 'COL1A2', 'COL5A1', 'AC104532.2', 'CERCAM', 'TMEM119', 'ITGBL1', 'SNAI2', 'GAS1', 'VIM', 'KANK4']	ARCHS4 (coexpressed genes)	16.5923	upregulated
FBN1 human tf ARCHS4 coexpression	6.2603	239.176	9.6015e-15	2.55699e-17	['FOXC2', 'COL16A1', 'PCDHGB5', 'SEMA3C', 'CITED2', 'LRRC17', 'LTBP2', 'PALM2-AKAP2', 'PRSS23', 'NID2', 'LOXL2', 'CTGF', 'NT5E', 'PAMR1', 'GALNT5', 'IL1R1', 'OSR1', 'WNT5A', 'FN1', 'MICAL2', 'SSC5D', 'COL1A1', 'GREM1', 'MFAP5', 'COL3A1', 'CCDC80', 'COL1A2', 'COL5A1', 'PALLD', 'ITGA11', 'CERCAM', 'TMEM119', 'ITGBL1', 'SNAI2', 'GAS1', 'CSPG4', 'ALPK2', 'AC090094.1', 'TGFBI']	ARCHS4 (coexpressed genes)	16.5923	upregulated
NR2F1 human tf ARCHS4 coexpression	6.2603	239.176	9.6015e-15	2.55699e-17	['NECAB2', 'CRB2', 'SEMA5B', 'CELF3', 'ILDR2', 'SOX21', 'TSPAN11', 'GRM3', 'ADGRG1', 'SOX1', 'DACH1', 'DPYSL5', 'MAP2', 'ENC1', 'BOC', 'ZIC1', 'NNAT', 'SLIT1', 'ZNF503', 'SOX9', 'CTNNA2', 'WLS', 'LRRC4B', 'IRX1', 'TGFB2', 'FZD2', 'OLIG3', 'WNT7B', 'TPBG', 'NR2F2', 'SORCS2', 'POU3F2', 'POU3F4', 'CYP26C1', 'LMX1A', 'FEZ1', 'ID4', 'FJX1', 'SDK2']	ARCHS4 (coexpressed genes)	16.5923	upregulated
TBX5 human tf ARCHS4 coexpression	6.06294	220.516	4.80799e-14	1.60053e-16	['FHOD3', 'FBN2', 'ECM1', 'COL16A1', 'PCDHGB5', 'EPAS1', 'CITED2', 'LRRC17', 'HSPB7', 'LTBP2', 'PALM2-AKAP2', 'NID2', 'LOXL2', 'ANKRD1', 'PAMR1', 'GALNT5', 'FZD2', 'IGFBP5', 'IL1R1', 'LUM', 'WNT5A', 'FN1', 'SSC5D', 'TBX18', 'COL1A1', 'GREM1', 'SFRP1', 'COL3A1', 'CCDC80', 'COL1A2', 'PSG5', 'COL5A1', 'CRISPLD2', 'PALLD', 'TMEM119', 'SNAI2', 'GAS1', 'ALPK2']	ARCHS4 (coexpressed genes)	15.7957	upregulated
TP63 human tf ARCHS4 coexpression	5.86785	202.844	2.42973e-13	9.70598e-16	['COL17A1', 'C5ORF46', 'TENM2', 'ANXA8L1', 'BNC1', 'LAMA3', 'TACSTD2', 'LAMC2', 'CST6', 'PTHLH', 'NIPAL4', 'TGM1', 'SCEL', 'THBD', 'TRIM29', 'DUOXA1', 'ANXA8', 'S100A14', 'ITGB6', 'KRT6A', 'CPA4', 'TFAP2A', 'CDSN', 'LAMB3', 'EMP1', 'GRHL3', 'KRT5', 'KRT17', 'GJB3', 'KRT16', 'KRT14', 'LY6D', 'SNAI2', 'DSG3', 'NECTIN4', 'DSC3', 'BNIPL']	ARCHS4 (coexpressed genes)	15.013	upregulated
PHC1 16625203 ChIP-ChIP MESCs Mouse	3.25057	100.525	1.02734e-12	3.70939e-14	['PTPRT', 'SEMA5B', 'NRP2', 'PCDHGB6', 'PCDHGB5', 'HHIP', 'RAX', 'SOX21', 'THBD', 'DACH1', 'ZIC2', 'LRRTM1', 'BOC', 'SIX3', 'ZIC1', 'CYP1B1', 'SOX9', 'LMO1', 'IGFBP5', 'MSX2', 'OLIG3', 'SLC30A2', 'OSR1', 'WNT5A', 'PAX3', 'PAX6', 'SEZ6L', 'POU3F2', 'POU3F4', 'COL2A1', 'LMX1A', 'HAND1', 'PKP1', 'FBN2', 'FOXC2', 'FOXC1', 'EPAS1', 'KCNA1', 'LEF1', 'NPR3', 'TACSTD2', 'GATA3', 'DLL1', 'FRZB', 'NTF3', '…	ChEA (experimentally validated targets)	13.4307	upregulated
PRRX1 human tf ARCHS4 coexpression	5.675	186.132	1.06994e-12	5.69874e-15	['TNXB', 'COL16A1', 'PCDHGB5', 'CPXM2', 'HTRA3', 'LTBP2', 'PALM2-AKAP2', 'NID2', 'LOXL2', 'NT5E', 'PAMR1', 'GALNT5', 'IGFBP5', 'IL1R1', 'OSR1', 'FN1', 'SSC5D', 'COL1A1', 'GREM1', 'MFAP5', 'SMOC2', 'COL3A1', 'CCDC80', 'COL1A2', 'FNDC1', 'COL5A1', 'PALLD', 'ITGA11', 'CERCAM', 'TMEM119', 'ITGBL1', 'SNAI2', 'GAS1', 'CSPG4', 'ALPK2', 'VIM']	ARCHS4 (coexpressed genes)	14.2442	upregulated
NPAS3 human tf ARCHS4 coexpression	5.675	186.132	1.06994e-12	5.69874e-15	['CRB2', 'SEMA5B', 'PCDHGB6', 'LUZP2', 'LYPD1', 'ILDR2', 'GRM3', 'ADGRG1', 'SOX1', 'DACH1', 'SLITRK2', 'DPYSL5', 'MAP2', 'CDH20', 'ENC1', 'BOC', 'ZIC1', 'SLIT1', 'NRCAM', 'HES1', 'SOX9', 'CTNNA2', 'FGFBP3', 'IRX1', 'NR2F1', 'SEZ6L', 'POU3F2', 'POU3F4', 'MAPK10', 'MN1', 'COL1A2', 'FEZ1', 'SMOC1', 'ID4', 'VIM', 'ASTN1']	ARCHS4 (coexpressed genes)	14.2442	upregulated
NFATC4 human tf ARCHS4 coexpression	5.48436	170.352	2.70137e-12	3.23732e-14	['MOXD1', 'COL16A1', 'PKDCC', 'CPXM2', 'HTRA3', 'LTBP2', 'NID2', 'LOXL2', 'THBS3', 'BOC', 'PAMR1', 'TGFB2', 'FZD2', 'IGFBP5', 'IL1R1', 'OSR1', 'TPBG', 'NR2F1', 'FN1', 'SSC5D', 'TBX18', 'COL1A1', 'GREM1', 'COL3A1', 'CCDC80', 'COL1A2', 'PSG5', 'COL5A1', 'ITGA11', 'CERCAM', 'TMEM119', 'ITGBL1', 'SNAI2', 'GAS1', 'VIM']	ARCHS4 (coexpressed genes)	13.4898	upregulated
TWIST1 human tf ARCHS4 coexpression	5.48436	170.352	2.70137e-12	3.23732e-14	['FOXC2', 'ECM1', 'COL16A1', 'PCDHGB5', 'HTRA3', 'LTBP2', 'NID2', 'LOXL2', 'NT5E', 'HES1', 'PAMR1', 'FZD2', 'IGFBP5', 'IL1R1', 'LUM', 'OSR1', 'WNT5A', 'FN1', 'EMP1', 'SSC5D', 'FOXL1', 'TBX18', 'COL1A1', 'GREM1', 'MFAP5', 'COL3A1', 'CCDC80', 'COL1A2', 'PSG5', 'COL5A1', 'ITGA11', 'TMEM119', 'ITGBL1', 'SNAI2', 'GAS1']	ARCHS4 (coexpressed genes)	13.4898	upregulated
CREB3L1 human tf ARCHS4 coexpression	5.48436	170.352	2.70137e-12	3.23732e-14	['ECM1', 'COL16A1', 'PCDHGB5', 'CITED2', 'LTBP2', 'PRSS23', 'NID2', 'ACTG2', 'LOXL2', 'CTGF', 'NT5E', 'PAMR1', 'GALNT5', 'FZD2', 'IGFBP5', 'IL1R1', 'OSR1', 'FN1', 'MICAL2', 'SSC5D', 'COL1A1', 'GREM1', 'COL3A1', 'CCDC80', 'COL1A2', 'PSG5', 'COL5A1', 'PALLD', 'ITGA11', 'CERCAM', 'TMEM119', 'ITGBL1', 'SNAI2', 'AC090094.1', 'TGFBI']	ARCHS4 (coexpressed genes)	13.4898	upregulated
IRX1 human tf ARCHS4 coexpression	5.48436	170.352	2.70137e-12	3.23732e-14	['CRB2', 'SEMA5B', 'TENM2', 'PCDHGB6', 'GREB1L', 'SOX21', 'TSPAN11', 'ADGRG1', 'SOX1', 'DACH1', 'DPYSL5', 'MAP2', 'CDH20', 'BOC', 'ZIC1', 'SLIT1', 'MAP6', 'FGFBP3', 'LRRC4B', 'TMEM132C', 'IRX2', 'C5ORF38', 'PCDH8', 'NR2F1', 'NR2F2', 'SORCS2', 'POU3F2', 'POU3F4', 'MN1', 'COL1A2', 'CYP26C1', 'FEZ1', 'ID4', 'VIM', 'FJX1']	ARCHS4 (coexpressed genes)	13.4898	upregulated
SOX1 human tf ARCHS4 coexpression	5.48436	170.352	2.70137e-12	3.23732e-14	['CRB2', 'SEMA5B', 'PCDHGB6', 'CELF3', 'ILDR2', 'SOX21', 'TSPAN11', 'GLI3', 'DACH1', 'DPYSL5', 'MAP2', 'CDH20', 'BOC', 'ZIC1', 'SIX3', 'MAP6', 'FGFBP3', 'ZNF521', 'LRRC4B', 'IRX1', 'BTBD17', 'WNT7B', 'NR2F1', 'POU3F2', 'DLK1', 'POU3F4', 'MAPK10', 'MN1', 'COL2A1', 'FEZ1', 'SMOC1', 'ID4', 'FXYD6', 'SP8', 'SDK2']	ARCHS4 (coexpressed genes)	13.4898	upregulated
OSR2 human tf ARCHS4 coexpression	5.48436	170.352	2.70137e-12	3.23732e-14	['MOXD1', 'ECM1', 'TNXB', 'COL16A1', 'PCDHGB5', 'CITED2', 'CPXM2', 'HTRA3', 'LTBP2', 'NID2', 'PLAGL1', 'CTSF', 'PAMR1', 'IGFBP5', 'IL1R1', 'LUM', 'OSR1', 'WNT5A', 'FN1', 'SSC5D', 'DKK1', 'TBX18', 'COL1A1', 'GREM1', 'SMOC2', 'CCDC80', 'COL1A2', 'PSG5', 'COL5A1', 'CERCAM', 'TMEM119', 'ITGBL1', 'SNAI2', 'GAS1', 'ALPK2']	ARCHS4 (coexpressed genes)	13.4898	upregulated
ZNF521 human tf ARCHS4 coexpression	5.48436	170.352	2.70137e-12	3.23732e-14	['PCDHGB6', 'GREB1L', 'ILDR2', 'PRTG', 'SOX1', 'DACH1', 'ZIC2', 'DPYSL5', 'MAP2', 'BOC', 'ZIC1', 'MAP6', 'OTX2', 'CTNNA2', 'OTX1', 'FEZF1', 'TRPM3', 'WLS', 'LGI1', 'EPHA4', 'TMEM132C', 'BTBD17', 'SKIDA1', 'TPBG', 'NR2F1', 'POU3F2', 'ZFHX4', 'DLK1', 'MAPK10', 'COL2A1', 'LIX1', 'FEZ1', 'SP8', 'SDK2', 'ASTN1']	ARCHS4 (coexpressed genes)	13.4898	upregulated
DSP human tf ARCHS4 coexpression	5.48436	170.352	2.70137e-12	3.23732e-14	['COL17A1', 'ANXA8L1', 'SEMA3C', 'BNC1', 'LAMA3', 'TACSTD2', 'LAMC2', 'CST6', 'PTHLH', 'TGM1', 'SCEL', 'RAB25', 'TRIM29', 'DUOXA1', 'ANXA8', 'S100A14', 'ITGB6', 'KRT6A', 'CPA4', 'TFAP2A', 'CDKN2B', 'CDSN', 'LAMB3', 'GRHL3', 'KRT5', 'EPN3', 'KRT17', 'GJB3', 'KRT16', 'KRT14', 'LY6D', 'PKP1', 'DSG3', 'NECTIN4', 'BNIPL']	ARCHS4 (coexpressed genes)	13.4898	upregulated
PPP1R13L human tf ARCHS4 coexpression	5.48436	170.352	2.70137e-12	3.23732e-14	['COL17A1', 'ANXA8L1', 'LAMA3', 'TACSTD2', 'LAMC2', 'CST6', 'TGM1', 'SCEL', 'WNT6', 'RAB25', 'DUOXA1', 'ANXA8', 'S100A14', 'KRT6A', 'TFAP2A', 'CDSN', 'LAMB3', 'KRT7', 'TMEM40', 'TINCR', 'GRHL3', 'KRT5', 'EPN3', 'KRT17', 'GJB3', 'KRT16', 'KRT14', 'LY6D', 'PKP1', 'DSG3', 'RHCG', 'NECTIN4', 'PTGES', 'DSC3', 'BNIPL']	ARCHS4 (coexpressed genes)	13.4898	upregulated
PRRX2 human tf ARCHS4 coexpression	5.48436	170.352	2.70137e-12	3.23732e-14	['ECM1', 'COL16A1', 'PCDHGB5', 'CITED2', 'CPXM2', 'LTBP2', 'NID2', 'LOXL2', 'CTGF', 'NT5E', 'PAMR1', 'GALNT5', 'FZD2', 'IL1R1', 'LUM', 'IGFBP3', 'FN1', 'SSC5D', 'DKK1', 'COL1A1', 'GREM1', 'MFAP5', 'CCDC80', 'COL1A2', 'PSG5', 'COL5A1', 'ITGA11', 'CERCAM', 'TMEM119', 'ITGBL1', 'SNAI2', 'GAS1', 'ALPK2', 'AC090094.1', 'TGFBI']	ARCHS4 (coexpressed genes)	13.4898	upregulated
POU3F3 human tf ARCHS4 coexpression	5.29589	155.477	1.33534e-11	1.77808e-13	['CRB2', 'SEMA5B', 'PCDHGB6', 'CELF3', 'ILDR2', 'TSPAN11', 'ADGRG1', 'SOX1', 'DPYSL5', 'MAP2', 'CDH20', 'ENC1', 'BOC', 'ZIC1', 'SLIT1', 'MAP6', 'CTNNA2', 'LRRC4B', 'IRX1', 'CCDC177', 'BTBD17', 'PCDH8', 'NR2F1', 'POU3F2', 'DLK1', 'POU3F4', 'MAPK10', 'MN1', 'LHX2', 'FEZ1', 'SMOC1', 'FXYD6', 'FJX1', 'ASTN1']	ARCHS4 (coexpressed genes)	12.75	upregulated
EN2 human tf ARCHS4 coexpression	5.29589	155.477	1.33534e-11	1.77808e-13	['CRB2', 'SEMA5B', 'PCDHGB6', 'PTPRO', 'LYPD1', 'ILDR2', 'SOX21', 'TSPAN11', 'SOX1', 'DACH1', 'DPYSL5', 'MAP2', 'LRRTM1', 'ZIC1', 'MAP6', 'OTX2', 'HES1', 'SOX9', 'MSX1', 'OTX1', 'NKX6-1', 'IRX1', 'IRX2', 'KCNIP1', 'PCDH8', 'NR2F1', 'NR2F2', 'POU3F2', 'POU3F4', 'MN1', 'LMX1A', 'FEZ1', 'ID4', 'FJX1']	ARCHS4 (coexpressed genes)	12.75	upregulated
EZH2 B cell hg19	2.46956	73.7812	4.27827e-11	1.05898e-13	['SEMA5B', 'F13A1', 'LOXL2', 'DPYSL5', 'PLAU', 'ANPEP', 'CYP1B1', 'BAHCC1', 'PKNOX2', 'SAMD11', 'LMO1', 'IGFBP5', 'EBF4', 'COX6B2', 'DKK1', 'SRCIN1', 'RUNX1', 'NPAS4', 'MAF', 'FNDC1', 'FEZ1', 'CERCAM', 'RHCG', 'DGKI', 'C11ORF96', 'FBLN7', 'BEAN1', 'PKDCC', 'CRABP2', 'RRAD', 'CABP7', 'NPR3', 'ALOX15', 'GLIS3', 'C17ORF96', 'SCUBE3', 'WNT6', 'CDH23', 'MAP6', 'ST8SIA6', 'NPTX1', 'RHBDL3', 'NKX6-1', '…	ENCODE (experimentally validated targets)	12.9751	upregulated
DACH1 human tf ARCHS4 coexpression	5.10958	141.48	5.06127e-11	9.43512e-13	['CRB2', 'SEMA5B', 'PCDHGB6', 'CELF3', 'GREB1L', 'TSPAN11', 'SOX1', 'TMEM169', 'DPYSL5', 'MAP2', 'BOC', 'ZIC1', 'NNAT', 'MAP6', 'CTNNA2', 'OTX1', 'ZNF521', 'LGI1', 'OLIG3', 'SKIDA1', 'NR2F1', 'PAX6', 'POU3F2', 'ZFHX4', 'MEIS2', 'POU3F4', 'MAPK10', 'LMX1A', 'LIX1', 'LHX2', 'ID4', 'LHX5', 'SDK2']	ARCHS4 (coexpressed genes)	12.0253	upregulated
MKX human tf ARCHS4 coexpression	5.10958	141.48	5.06127e-11	9.43512e-13	['MOXD1', 'COL16A1', 'PCDHGB5', 'SEMA3C', 'CITED2', 'CPXM2', 'PALM2-AKAP2', 'NID2', 'LOXL2', 'CTGF', 'PAMR1', 'GALNT5', 'FZD2', 'IGFBP5', 'IGFBP3', 'WNT5A', 'FN1', 'SSC5D', 'DKK1', 'COL1A1', 'GREM1', 'CCDC80', 'COL1A2', 'PSG5', 'COL5A1', 'PSG4', 'ITGA11', 'CERCAM', 'TMEM119', 'ITGBL1', 'GAS1', 'ALPK2', 'AC090094.1']	ARCHS4 (coexpressed genes)	12.0253	upregulated
FOXF1 human tf ARCHS4 coexpression	5.10958	141.48	5.06127e-11	9.43512e-13	['ECM1', 'COL16A1', 'PCDHGB5', 'EPAS1', 'CITED2', 'LRRC17', 'LTBP2', 'NID2', 'LOXL2', 'CTGF', 'NT5E', 'ABLIM3', 'PLAU', 'PAMR1', 'WLS', 'GALNT5', 'FZD2', 'IGFBP5', 'IL1R1', 'MMP1', 'WNT5A', 'FN1', 'MICAL2', 'FOXL1', 'COL1A1', 'GREM1', 'SFRP1', 'COL3A1', 'COL1A2', 'COL5A1', 'SNAI2', 'AC090094.1', 'TGFBI']	ARCHS4 (coexpressed genes)	12.0253	upregulated
BNC1 human tf ARCHS4 coexpression	5.10958	141.48	5.06127e-11	9.43512e-13	['COL17A1', 'TENM2', 'ANXA8L1', 'SEMA3C', 'LAMA3', 'TACSTD2', 'LAMC2', 'PTHLH', 'TGM1', 'TRIM29', 'ANXA8', 'S100A14', 'ITGB6', 'KRT6A', 'CPA4', 'LAMB3', 'FN1', 'KRT7', 'GRHL3', 'KRT5', 'TBX18', 'DAZL', 'IL1A', 'EPGN', 'KRT17', 'GJB3', 'KRT16', 'KRT14', 'SNAI2', 'PKP1', 'DSG3', 'KANK4', 'DSC3']	ARCHS4 (coexpressed genes)	12.0253	upregulated
SOX21 human tf ARCHS4 coexpression	5.10958	141.48	5.06127e-11	9.43512e-13	['CRB2', 'SEMA5B', 'GREB1L', 'ILDR2', 'TSPAN11', 'SOX1', 'BOC', 'HESX1', 'SLIT1', 'OTX2', 'HES1', 'SOX9', 'MSX1', 'OTX1', 'RHBDL3', 'FGFBP3', 'FEZF1', 'IRX1', 'IRX2', 'FZD2', 'SKIDA1', 'TPBG', 'NR2F1', 'EBF4', 'POU3F1', 'POU3F2', 'POU3F4', 'LMX1A', 'SMOC1', 'ID4', 'SP8', 'FJX1', 'SDK2']	ARCHS4 (coexpressed genes)	12.0253	upregulated
DLX3 human tf ARCHS4 coexpression	5.10958	141.48	5.06127e-11	9.43512e-13	['COL17A1', 'LGALS3BP', 'ANXA8L1', 'CLIC3', 'IFI6', 'TACSTD2', 'GATA3', 'VTCN1', 'CST6', 'P2RY6', 'RAB25', 'TRIM29', 'ANXA8', 'MSX1', 'RBBP8NL', 'CPA4', 'TFAP2A', 'WNT10A', 'CDSN', 'MSX2', 'TINCR', 'GRHL3', 'UPK3B', 'EPN3', 'GJB3', 'KRT14', 'LY6D', 'PKP1', 'S100A3', 'NECTIN4', 'PTGES', 'DSC3', 'ATP6V1B1']	ARCHS4 (coexpressed genes)	12.0253	upregulated
ARNTL2 human tf ARCHS4 coexpression	5.10958	141.48	5.06127e-11	9.43512e-13	['COL17A1', 'ANXA8L1', 'COL13A1', 'BNC1', 'SERPINE1', 'LAMA3', 'TACSTD2', 'LAMC2', 'SGMS2', 'PTHLH', 'TGM1', 'SCEL', 'NT5E', 'TRIM29', 'PLAU', 'ANXA8', 'S100A14', 'KRT6A', 'LAMB3', 'KRT7', 'EMP1', 'GRHL3', 'KRT5', 'DKK1', 'IL1A', 'KRT17', 'GJB3', 'KRT14', 'PKP1', 'AC090094.1', 'DSG3', 'RHCG', 'DSC3']	ARCHS4 (coexpressed genes)	12.0253	upregulated
BARX2 human tf ARCHS4 coexpression	5.10958	141.48	5.06127e-11	9.43512e-13	['ANXA8L1', 'ECM1', 'CRABP2', 'TACSTD2', 'CST6', 'LA16C-380H5.3', 'TGM1', 'SCEL', 'WNT6', 'RAB25', 'TRIM29', 'DUOXA1', 'S100A14', 'WNT10A', 'CDSN', 'EMP1', 'TINCR', 'GRHL3', 'TM4SF1', 'IL22RA1', 'EFNA1', 'EPN3', 'MAF', 'GJB3', 'KRT14', 'LY6D', 'PKP1', 'DSG3', 'RHCG', 'NECTIN4', 'DSC3', 'ATP6V1B1', 'BNIPL']	ARCHS4 (coexpressed genes)	12.0253	upregulated
SP8 human tf ARCHS4 coexpression	4.74328	116.011	1.08688e-09	2.38795e-11	['CRB2', 'WFIKKN1', 'GREB1L', 'GDPD2', 'ILDR2', 'SOX21', 'GLI3', 'PRTG', 'SOX1', 'ZIC2', 'DPYSL5', 'TMEM88', 'BOC', 'ZIC1', 'SIX3', 'OTX2', 'OTX1', 'FEZF2', 'FEZF1', 'ZNF521', 'EPHA4', 'BTBD17', 'SKIDA1', 'ZIC5', 'ZFHX4', 'DLK1', 'COL2A1', 'LHX2', 'GAS1', 'LHX5', 'SDK2']	ARCHS4 (coexpressed genes)	10.622	upregulated
IRF6 human tf ARCHS4 coexpression	4.74328	116.011	1.08688e-09	2.38795e-11	['COL17A1', 'ANXA8L1', 'BNC1', 'LAMA3', 'TACSTD2', 'LAMC2', 'PTHLH', 'TGM1', 'SCEL', 'RAB25', 'TRIM29', 'DUOXA1', 'ANXA8', 'S100A14', 'ITGB6', 'KRT6A', 'CDSN', 'LAMB3', 'TMEM40', 'GRHL3', 'KRT5', 'EPN3', 'GJB3', 'KRT16', 'KRT14', 'LY6D', 'PKP1', 'DSG3', 'RHCG', 'NECTIN4', 'DSC3']	ARCHS4 (coexpressed genes)	10.622	upregulated
OTX1 human tf ARCHS4 coexpression	4.74328	116.011	1.08688e-09	2.38795e-11	['CRB2', 'TENM2', 'ILDR2', 'SOX21', 'GLI3', 'PRTG', 'SOX1', 'DACH1', 'ZIC1', 'SIX3', 'MAP6', 'ZNF503', 'OTX2', 'ZNF521', 'WLS', 'EPHA4', 'TMEM132C', 'CCDC177', 'SKIDA1', 'NR2F1', 'PAX6', 'SORCS2', 'POU3F2', 'ZFHX4', 'DLK1', 'MN1', 'LMX1A', 'LIX1', 'LHX2', 'SP8', 'SDK2']	ARCHS4 (coexpressed genes)	10.622	upregulated
FOXN1 human tf ARCHS4 coexpression	4.74328	116.011	1.08688e-09	2.38795e-11	['COL17A1', 'ANXA8L1', 'ECM1', 'TACSTD2', 'CST6', 'TGM1', 'SCEL', 'RAB25', 'TRIM29', 'DUOXA1', 'ANXA8', 'S100A14', 'KRT6A', 'CDSN', 'EMP1', 'TINCR', 'GRHL3', 'KRT5', 'EPN3', 'KRT17', 'GJB3', 'KRT16', 'KRT14', 'LY6D', 'PKP1', 'S100A3', 'DSG3', 'RHCG', 'NECTIN4', 'DSC3', 'BNIPL']	ARCHS4 (coexpressed genes)	10.622	upregulated
ZNF750 human tf ARCHS4 coexpression	4.74328	116.011	1.08688e-09	2.38795e-11	['COL17A1', 'C5ORF46', 'ANXA8L1', 'ECM1', 'TACSTD2', 'CST6', 'TGM1', 'SCEL', 'RAB25', 'TRIM29', 'DUOXA1', 'ANXA8', 'S100A14', 'KRT6A', 'CDSN', 'EMP1', 'TINCR', 'GRHL3', 'KRT5', 'EPN3', 'KRT17', 'GJB3', 'KRT16', 'KRT14', 'LY6D', 'PKP1', 'DSG3', 'RHCG', 'NECTIN4', 'DSC3', 'BNIPL']	ARCHS4 (coexpressed genes)	10.622	upregulated
TRIM28 21343339 ChIP-Seq HEK293 Human	9.36666	218.1	2.0489e-09	7.71955e-11	['CDKN2B', 'NNMT', 'EPAS1', 'LUM', 'IGFBP3', 'C8ORF4', 'PRSS23', 'SOX21', 'HAPLN1', 'TM4SF1', 'BST2', 'FNDC1', 'COL5A1', 'ITGA11', 'ANKRD1', 'RHBDL3', 'PTGES']	ChEA (experimentally validated targets)	10.1124	upregulated
GLIS1 human tf ARCHS4 coexpression	4.56324	104.487	4.6155e-09	1.13697e-10	['FOXC2', 'COL16A1', 'NNMT', 'PCDHGB5', 'CITED2', 'LTBP2', 'NID2', 'LOXL2', 'CTGF', 'NT5E', 'PAMR1', 'FZD2', 'WNT5A', 'FN1', 'MICAL2', 'SSC5D', 'COL1A1', 'GREM1', 'CCDC80', 'COL1A2', 'COL5A1', 'PALLD', 'ITGA11', 'CERCAM', 'TMEM119', 'ITGBL1', 'SNAI2', 'CSPG4', 'TGFBI', 'VIM']	ARCHS4 (coexpressed genes)	9.94425	upregulated
GRHL3 human tf ARCHS4 coexpression	4.56324	104.487	4.6155e-09	1.13697e-10	['COL17A1', 'ANXA8L1', 'ECM1', 'CRABP2', 'TACSTD2', 'TGM1', 'SCEL', 'RAB25', 'TRIM29', 'DUOXA1', 'ANXA8', 'S100A14', 'KRT6A', 'CDSN', 'TMEM40', 'EMP1', 'TINCR', 'KRT5', 'EPN3', 'KRT17', 'GJB3', 'KRT16', 'KRT14', 'LY6D', 'PKP1', 'DSG3', 'RHCG', 'NECTIN4', 'DSC3', 'BNIPL']	ARCHS4 (coexpressed genes)	9.94425	upregulated
GRHL1 human tf ARCHS4 coexpression	4.56324	104.487	4.6155e-09	1.13697e-10	['ANXA8L1', 'FAXDC2', 'TACSTD2', 'DAPP1', 'CST6', 'TGM1', 'SCEL', 'RAB25', 'TRIM29', 'DUOXA1', 'ANXA8', 'S100A14', 'KRT6A', 'CDSN', 'TMEM40', 'TINCR', 'GRHL3', 'EPN3', 'GJB3', 'KRT16', 'KRT14', 'LY6D', 'PKP1', 'ACKR2', 'DSG3', 'RHCG', 'RP11-544M22.13', 'NECTIN4', 'DSC3', 'BNIPL']	ARCHS4 (coexpressed genes)	9.94425	upregulated
MEOX2 human tf ARCHS4 coexpression	4.56324	104.487	4.6155e-09	1.13697e-10	['FBN2', 'NRP2', 'TNXB', 'COL16A1', 'PKDCC', 'CRABP2', 'PALM2-AKAP2', 'MEOX1', 'AQP1', 'THBS3', 'TGFB2', 'OSR1', 'TNFRSF19', 'NR2F1', 'EMP1', 'SSC5D', 'NR2F2', 'SMOC2', 'COL3A1', 'FNDC1', 'COL5A1', 'PALLD', 'TNNT3', 'ALDH1A1', 'GAS1', 'CSPG4', 'LHX4', 'VIM', 'SCN4B', 'KANK4']	ARCHS4 (coexpressed genes)	9.94425	upregulated
FOXC2 human tf ARCHS4 coexpression	4.38523	93.734	1.90932e-08	5.21186e-10	['PCDHGB5', 'HHIP', 'SERPINE1', 'LTBP2', 'PRSS23', 'NID2', 'LOXL2', 'CTGF', 'NT5E', 'TIMP3', 'IL11', 'FZD2', 'VWF', 'FN1', 'MICAL2', 'SSC5D', 'FOXL1', 'COL1A1', 'GREM1', 'CCDC80', 'COL1A2', 'COL5A1', 'PALLD', 'ITGA11', 'ITGBL1', 'SNAI2', 'CSPG4', 'TGFBI', 'VIM']	ARCHS4 (coexpressed genes)	9.28301	upregulated
ZNF423 human tf ARCHS4 coexpression	4.38523	93.734	1.90932e-08	5.21186e-10	['CRB2', 'PCDHGB6', 'CELF3', 'GREB1L', 'FIGNL2', 'ILDR2', 'TSPAN11', 'DACH1', 'ZIC2', 'DPYSL5', 'MAP2', 'BOC', 'ZIC1', 'SLIT1', 'MAP6', 'RHBDL3', 'HES3', 'ZNF521', 'WLS', 'LRRC4B', 'IRX1', 'IRX2', 'NR2F1', 'ZIC5', 'SORCS2', 'MN1', 'FEZ1', 'SDK2', 'ASTN1']	ARCHS4 (coexpressed genes)	9.28301	upregulated
POU3F2 human tf ARCHS4 coexpression	4.38523	93.734	1.90932e-08	5.21186e-10	['SEMA5B', 'PCDHGB6', 'CELF3', 'ILDR2', 'SOX21', 'TSPAN11', 'GRM3', 'ADGRG1', 'SOX1', 'DACH1', 'DPYSL5', 'MAP2', 'ENC1', 'BOC', 'NNAT', 'SLIT1', 'MAP6', 'SOX9', 'CTNNA2', 'RHBDL3', 'IRX1', 'OLIG3', 'NR2F1', 'POU3F1', 'POU3F4', 'MAPK10', 'MN1', 'FEZ1', 'ID4']	ARCHS4 (coexpressed genes)	9.28301	upregulated
HEY1 human tf ARCHS4 coexpression	4.38523	93.734	1.90932e-08	5.21186e-10	['SEMA5B', 'FOXC1', 'PCDHGB6', 'LYPD1', 'ATP1A2', 'DACH1', 'MAP2', 'CDH20', 'ZIC1', 'BAALC', 'ZNF503', 'SOX9', 'MSX1', 'RHBDL3', 'FGFBP3', 'IRX1', 'EBF4', 'SEZ6L', 'POU3F2', 'MN1', 'COL1A2', 'FEZ1', 'SMOC1', 'ID4', 'FXYD6', 'VIM', 'ADGRL4', 'FJX1', 'ASTN1']	ARCHS4 (coexpressed genes)	9.28301	upregulated
POU5F1 16153702 ChIP-ChIP HESCs Human	3.07481	61.7272	4.87168e-08	1.91196e-09	['FOXC1', 'KLHL14', 'LEF1', 'DLL1', 'CUZD1', 'GLI3', 'PTHLH', 'CTGF', 'IFIH1', 'NT5E', 'CYP26B1', 'DACH1', 'ZIC2', 'ZIC1', 'HESX1', 'ANKRD1', 'GPC3', 'ME3', 'OTX1', 'NKX6-1', 'LGI1', 'IRX2', 'EPHA4', 'OLIG3', 'OSR1', 'NR2F1', 'FOXJ1', 'PAX6', 'NR2F2', 'ZIC5', 'DKK1', 'POU3F2', 'MEIS2', 'POU3F4', 'SFRP1', 'LHX2', 'FEZ1', 'ID2', 'HAND1', 'GAS1', 'LHX5', 'SP8', 'DSC3']	ChEA (experimentally validated targets)	8.71852	upregulated
SOX2 human tf ARCHS4 coexpression	4.20924	83.7273	7.84387e-08	2.2978e-09	['CRB2', 'SEMA5B', 'ILDR2', 'SOX21', 'TSPAN11', 'SOX1', 'ZIC2', 'CDH20', 'BOC', 'ZIC1', 'SIX3', 'OTX2', 'HES1', 'SOX9', 'OTX1', 'FGFBP3', 'LRRC4B', 'IRX1', 'TMEM132C', 'IRX2', 'NR2F1', 'NR2F2', 'ZIC5', 'POU3F2', 'POU3F4', 'SMOC1', 'ID4', 'SDK2']	ARCHS4 (coexpressed genes)	8.63869	upregulated
HES5 human tf ARCHS4 coexpression	4.20924	83.7273	7.84387e-08	2.2978e-09	['CRB2', 'SEMA5B', 'ILDR2', 'SOX21', 'TSPAN11', 'SOX1', 'BOC', 'ZIC1', 'SIX3', 'MAP6', 'OTX1', 'FEZF2', 'FGFBP3', 'DRD4', 'LRRC4B', 'IRX1', 'BTBD17', 'WNT7B', 'NR2F1', 'NR2F2', 'SORCS2', 'DLK1', 'POU3F4', 'COL2A1', 'LHX2', 'ID4', 'SP8', 'SDK2']	ARCHS4 (coexpressed genes)	8.63869	upregulated
GLI3 human tf ARCHS4 coexpression	4.20924	83.7273	7.84387e-08	2.2978e-09	['CRB2', 'GDPD2', 'ILDR2', 'TSPAN11', 'PRTG', 'SOX1', 'DACH1', 'ZIC2', 'SLITRK2', 'BOC', 'ZIC1', 'OTX2', 'SOX9', 'OTX1', 'FZD2', 'SKIDA1', 'TPBG', 'NR2F1', 'PAX6', 'ZFHX4', 'MEIS2', 'MN1', 'COL2A1', 'LIX1', 'LHX2', 'GAS1', 'SP8', 'SDK2']	ARCHS4 (coexpressed genes)	8.63869	upregulated
FOXL1 human tf ARCHS4 coexpression	4.03523	74.4408	2.86645e-07	9.73296e-09	['C11ORF96', 'FOXC2', 'PCDHGB5', 'LRRC17', 'LTBP2', 'NID2', 'LOXL2', 'CTGF', 'NT5E', 'ABLIM3', 'PLAU', 'PAMR1', 'IL11', 'GALNT5', 'IGFBP5', 'FN1', 'MICAL2', 'COL1A1', 'GREM1', 'SFRP1', 'COL5A1', 'ITGA11', 'SNAI2', 'CSPG4', 'AC090094.1', 'TGFBI', 'MGLL']	ARCHS4 (coexpressed genes)	8.01175	upregulated
GBX2 human tf ARCHS4 coexpression	4.03523	74.4408	2.86645e-07	9.73296e-09	['CRB2', 'SEMA5B', 'PCDHGB6', 'SOX21', 'TSPAN11', 'ADGRG1', 'SOX1', 'DPYSL5', 'MAP2', 'CDH20', 'BOC', 'ZIC1', 'MAP6', 'RHBDL3', 'FGFBP3', 'WLS', 'LRRC4B', 'IRX1', 'IRX2', 'BTBD17', 'NR2F1', 'POU3F2', 'POU3F4', 'COL1A2', 'CYP26C1', 'VIM', 'SDK2']	ARCHS4 (coexpressed genes)	8.01175	upregulated
DBX1 human tf ARCHS4 coexpression	4.03523	74.4408	2.86645e-07	9.73296e-09	['CRB2', 'SEMA5B', 'TENM2', 'PKDCC', 'GREB1L', 'FIGNL2', 'ILDR2', 'TSPAN11', 'PRTG', 'SOX1', 'DACH1', 'DPYSL5', 'BOC', 'NRCAM', 'RHBDL3', 'HES3', 'WLS', 'C11ORF87', 'FZD2', 'NR2F1', 'PAX3', 'TCAF1P1', 'HS3ST5', 'POU3F2', 'CYP26C1', 'SP8', 'SDK2']	ARCHS4 (coexpressed genes)	8.01175	upregulated
FOXE1 human tf ARCHS4 coexpression	4.03523	74.4408	2.86645e-07	9.73296e-09	['LGALS3BP', 'ECM1', 'CLIC3', 'EPAS1', 'TACSTD2', 'GLIS3', 'LTBP2', 'SGMS2', 'LRP2', 'NID2', 'SCEL', 'TRIM29', 'DUOXA1', 'ANXA8', 'SAMD11', 'KRT6A', 'KRT7', 'EMP1', 'GRHL3', 'KRT5', 'FNDC1', 'KRT17', 'ID4', 'LY6D', 'PKP1', 'DSG3', 'DGKI']	ARCHS4 (coexpressed genes)	8.01175	upregulated
HAND1 human tf ARCHS4 coexpression	4.03523	74.4408	2.86645e-07	9.73296e-09	['CRB2', 'PKDCC', 'GREB1L', 'FIGNL2', 'VTCN1', 'LRP2', 'NID2', 'HAPLN1', 'AQP1', 'PRTG', 'WNT11', 'TMEM88', 'FRZB', 'RSPO2', 'GPC3', 'MSX2', 'LUM', 'IGFBP3', 'IGF2', 'CYP26A1', 'COL3A1', 'COL5A1', 'PLSCR5', 'AC104532.2', 'SNAI2', 'ALPK2', 'KANK4']	ARCHS4 (coexpressed genes)	8.01175	upregulated
TFAP2A human tf ARCHS4 coexpression	4.03523	74.4408	2.86645e-07	9.73296e-09	['COL17A1', 'LGALS3BP', 'C5ORF46', 'ANXA8L1', 'FOXC1', 'SEMA3C', 'TACSTD2', 'GATA3', 'VTCN1', 'TRIM29', 'ANXA8', 'S100A14', 'CPA4', 'LAMB3', 'CDKN2A', 'EMP1', 'TINCR', 'NR2F2', 'KRT17', 'GJB3', 'SNAI2', 'GAS1', 'PKP1', 'NECTIN4', 'FOLR1', 'PTGES', 'DSC3']	ARCHS4 (coexpressed genes)	8.01175	upregulated
ID4 human tf ARCHS4 coexpression	4.03523	74.4408	2.86645e-07	9.73296e-09	['SEMA5B', 'LYPD1', 'ILDR2', 'SOX21', 'CTGF', 'GRM3', 'ADGRG1', 'SOX1', 'DACH1', 'MAP2', 'SLIT1', 'HES1', 'SOX9', 'MSX1', 'FGFBP3', 'NKX6-1', 'IRX1', 'IRX2', 'NR2F1', 'SEZ6L', 'POU3F2', 'POU3F4', 'LIX1', 'FEZ1', 'SMOC1', 'DGKI', 'SDK2']	ARCHS4 (coexpressed genes)	8.01175	upregulated
KLF4 19030024 ChIP-ChIP MESCs Mouse	2.19837	39.7979	3.36487e-07	1.37342e-08	['PCSK2', 'FHOD3', 'NRP2', 'CITED2', 'RAX', 'SOX1', 'DPYSL5', 'DUOXA1', 'SIX3', 'ZIC1', 'SOX9', 'FEZF2', 'IGFBP5', 'MSX2', 'OSR1', 'PAX3', 'PAX6', 'DKK1', 'SORCS2', 'POU3F2', 'RUNX1', 'COL2A1', 'LMX1A', 'HAND1', 'PKP1', 'FJX1', 'FOXC2', 'FOXC1', 'LEF1', 'ATP10D', 'NPR3', 'SEZ6', 'TACSTD2', 'DLL1', 'NID2', 'SCUBE3', 'WNT6', 'WNT11', 'NTF3', 'NNAT', 'OTX2', 'S100A14', 'NPTX1', 'MSX1', 'OTX1', 'HES3…	ChEA (experimentally validated targets)	7.8622	upregulated
BACH1 22875853 ChIP-PCR HELA AND SCP4 Human	2.23313	38.9933	6.15776e-07	2.61004e-08	['PCSK2', 'PTPRT', 'ACSM1', 'TNFAIP3', 'SOX21', 'CTGF', 'LFNG', 'CDH6', 'THBD', 'CYP26B1', 'DACH1', 'CYP1B1', 'TIMP3', 'CTSF', 'IER3', 'TGM2', 'IL11', 'DUSP1', 'MMP1', 'IGFBP3', 'WNT5A', 'C10ORF10', 'C8ORF4', 'PAX6', 'PDYN', 'IL1A', 'SFRP1', 'MAF', 'CRISPLD2', 'MFNG', 'TNNT3', 'CHI3L2', 'LTB', 'DGKI', 'CFTR', 'PTGES', 'COL17A1', 'FBN2', 'TNXB', 'NNMT', 'EPAS1', 'RRAD', 'ALOX15', 'LAMA3', 'LYPD1',…	ChEA (experimentally validated targets)	7.58335	upregulated
TCF21 human tf ARCHS4 coexpression	3.86317	65.8492	1.06114e-06	3.95633e-08	['TNXB', 'COL16A1', 'PKDCC', 'PCDHGB5', 'EPAS1', 'HTRA3', 'LRRC17', 'LTBP2', 'LRP2', 'NID2', 'AQP1', 'A2M', 'ZNF585B', 'PAMR1', 'GALNT5', 'IGFBP5', 'IL1R1', 'OSR1', 'SSC5D', 'FOXL1', 'GREM1', 'SFRP1', 'COL3A1', 'CCDC80', 'TMEM119', 'SNAI2']	ARCHS4 (coexpressed genes)	7.40271	upregulated
SOX9 human tf ARCHS4 coexpression	3.86317	65.8492	1.06114e-06	3.95633e-08	['PCDHGB6', 'LYPD1', 'ILDR2', 'SOX21', 'GLI3', 'ADGRG1', 'BOC', 'HES1', 'MSX1', 'FGFBP3', 'PCDH8', 'NR2F1', 'IGF2', 'SEZ6L', 'SORCS2', 'DHRS2', 'POU3F2', 'POU3F4', 'EFNA1', 'MN1', 'LMX1A', 'LIX1', 'SMOC1', 'ID4', 'NECTIN4', 'FJX1']	ARCHS4 (coexpressed genes)	7.40271	upregulated
TBX18 human tf ARCHS4 coexpression	3.86317	65.8492	1.06114e-06	3.95633e-08	['FOXC2', 'FOXC1', 'TNXB', 'COL16A1', 'SERPINE1', 'LTBP2', 'PALM2-AKAP2', 'NID2', 'LOXL2', 'PAMR1', 'TGFB2', 'OSR1', 'FN1', 'SSC5D', 'COL1A1', 'GREM1', 'COL3A1', 'CCDC80', 'COL1A2', 'COL5A1', 'TMEM119', 'ITGBL1', 'SNAI2', 'GAS1', 'ALPK2', 'TGFBI']	ARCHS4 (coexpressed genes)	7.40271	upregulated
NHLH1 human tf ARCHS4 coexpression	3.86317	65.8492	1.06114e-06	3.95633e-08	['WFIKKN1', 'CABP7', 'CELF3', 'GREB1L', 'FIGNL2', 'TSPAN11', 'THBS3', 'ADGRG1', 'TMEM169', 'DACH1', 'DPYSL5', 'MAP2', 'NNAT', 'SLIT1', 'MAP6', 'RSPO3', 'RHBDL3', 'DRD2', 'FEZF1', 'BTBD17', 'OLIG3', 'SORCS2', 'POU3F2', 'LHX2', 'LHX5', 'FJX1']	ARCHS4 (coexpressed genes)	7.40271	upregulated
OVOL1 human tf ARCHS4 coexpression	3.86317	65.8492	1.06114e-06	3.95633e-08	['COL17A1', 'ANXA8L1', 'TACSTD2', 'GATA3', 'TGM1', 'SCEL', 'RAB25', 'TRIM29', 'DUOXA1', 'ANXA8', 'S100A14', 'KRT6A', 'CDSN', 'TINCR', 'GRHL3', 'IL22RA1', 'EPN3', 'KRT17', 'GJB3', 'KRT16', 'KRT14', 'LY6D', 'PKP1', 'DSG3', 'NECTIN4', 'DSC3']	ARCHS4 (coexpressed genes)	7.40271	upregulated
RNF2 27304074 Chip-Seq NSC Mouse	2.34321	38.3042	1.80977e-06	7.95504e-08	['NRP2', 'HPSE2', 'BNC1', 'CITED2', 'LRRC4', 'CYP26B1', 'SOX1', 'ZIC2', 'DPYSL5', 'LRRTM1', 'SIX3', 'ZIC1', 'RSPO2', 'FEZF2', 'FEZF1', 'EDN1', 'MSX2', 'OSR1', 'SOX14', 'PAX3', 'ARL4C', 'MN1', 'HCK', 'COL2A1', 'MAF', 'GAS1', 'HMX2', 'DSC3', 'FOXC2', 'FOXC1', 'LEF1', 'GREB1L', 'GATA3', 'SLITRK2', 'GPC3', 'OTX2', 'NPTX1', 'MSX1', 'OTX1', 'RHBDL3', 'NKX6-1', 'IRX2', 'CDKN2A', 'HS3ST5', 'NR2F2', 'ZFHX…	ChEA (experimentally validated targets)	7.09936	upregulated
TP53 18474530 ChIP-ChIP U2OS Human	2.49007	39.193	3.12454e-06	1.45987e-07	['PCSK2', 'CSF1R', 'NRP2', 'NNMT', 'SEMA3C', 'HPSE2', 'EPAS1', 'RRAD', 'CITED2', 'DLL1', 'TSPAN11', 'GLI3', 'P2RY6', 'CYP26B1', 'SOX1', 'TRIM29', 'ENC1', 'GPC3', 'ME3', 'DRD2', 'KCNN4', 'IRX1', 'TMEM132C', 'EPHA4', 'GALNT5', 'IGFBP5', 'OSR1', 'WNT7A', 'MICAL2', 'GRHL3', 'FOXL1', 'DKK1', 'DHRS2', 'TBX18', 'FOSL2', 'RUNX1', 'COL1A1', 'MAPK10', 'CYP26A1', 'PSG5', 'FNDC1', 'KRT17', 'ID2', 'ALDH1A1', …	ChEA (experimentally validated targets)	6.83568	upregulated
SOX2 21211035 ChIP-Seq LN229 Gbm	1.74981	27.5277	3.12454e-06	1.47152e-07	['FHOD3', 'VIPR2', 'HPSE2', 'HHIP', 'PLEKHB1', 'RAX', 'F13A1', 'SOX21', 'LOXL2', 'CDH6', 'DPYSL5', 'SOX9', 'SAMD11', 'LMO1', 'EPHA4', 'MSX2', 'IL1R1', 'IGFBP3', 'LMO3', 'C8ORF4', 'SOX14', 'POU3F1', 'POU3F2', 'RUNX1', 'POU3F4', 'SFRP1', 'MAF', 'LMX1A', 'CRISPLD2', 'MFNG', 'PAPPA', 'PKP1', 'RHCG', 'EPAS1', 'TACSTD2', 'MAP2', 'CDH23', 'NPTX1', 'NKX6-1', 'TRPM3', 'ZNF662', 'CPA4', 'WNT4', 'FZD2', 'TM…	ChEA (experimentally validated targets)	6.83223	upregulated
HIF3A human tf ARCHS4 coexpression	4.03523	74.4408	3.60606e-06	9.73296e-09	['EEF1A1P7', 'RP11-147K6.2', 'LDHAP7', 'EIF4A1P10', 'EIF1P4', 'POTEKP', 'MYL6P2', 'RP11-440K22.1', 'RP11-64K7.1', 'EEF1A1P16', 'EEF1A1P17', 'PPIAP22', 'ALDOAP1', 'RP11-697N18.1', 'H3F3C', 'FTH1P5', 'ACTG1P9', 'ACTBL2', 'PRKAR1AP1', 'UBBP1', 'COX5BP1', 'EEF1A1P29', 'RP11-543B16.2', 'PFN1P10', 'CFL1P4', 'GAPDHP51', 'PFN1P11']	ARCHS4 (coexpressed genes)	8.01175	downregulated
SP6 human tf ARCHS4 coexpression	3.69305	57.9269	3.73424e-06	1.54143e-07	['ANXA8L1', 'CRABP2', 'IFI6', 'TACSTD2', 'FIGNL2', 'VTCN1', 'LRP2', 'WNT6', 'P2RY6', 'WNT11', 'RAB25', 'TRIM29', 'ANXA8', 'RBBP8NL', 'MSX2', 'NOS2', 'IGF2', 'KRT7', 'TINCR', 'GRHL3', 'EPN3', 'GJB3', 'KANK4', 'PTGES', 'ATP6V1B1']	ARCHS4 (coexpressed genes)	6.81208	upregulated
TSHZ3 human tf ARCHS4 coexpression	3.69305	57.9269	3.73424e-06	1.54143e-07	['COL16A1', 'PCDHGB5', 'PTPRO', 'LTBP2', 'NID2', 'LOXL2', 'PAMR1', 'IGFBP5', 'IL1R1', 'FN1', 'SOX14', 'MICAL2', 'SSC5D', 'COL1A1', 'GREM1', 'COL3A1', 'CCDC80', 'COL1A2', 'MAFB', 'COL5A1', 'TMEM119', 'FAM84A', 'ITGBL1', 'SNAI2', 'TGFBI']	ARCHS4 (coexpressed genes)	6.81208	upregulated
PAX3 human tf ARCHS4 coexpression	3.69305	57.9269	3.73424e-06	1.54143e-07	['CRB2', 'SEMA5B', 'PCDHGB6', 'LYPD1', 'GREB1L', 'GLIS3', 'DLL1', 'TMEM265', 'CDH6', 'PRTG', 'CYP26B1', 'DACH1', 'ZIC2', 'ZIC1', 'FGFBP3', 'ZNF521', 'WLS', 'LMO1', 'IRX1', 'AC006116.27', 'NOS2', 'POU3F2', 'MAPK10', 'VIM', 'SDK2']	ARCHS4 (coexpressed genes)	6.81208	upregulated
LMX1A human tf ARCHS4 coexpression	3.69305	57.9269	3.73424e-06	1.54143e-07	['PTPRO', 'SOX21', 'DACH1', 'RSPO2', 'ZNF503', 'OTX2', 'HES1', 'SOX9', 'OTX1', 'SPTLC1P1', 'ZNF521', 'TRPM3', 'WLS', 'LGI1', 'TMEM132C', 'CCDC177', 'SKIDA1', 'TPBG', 'NR2F1', 'COX6B2', 'ZFHX4', 'ID4', 'FJX1', 'SDK2', 'CFAP77']	ARCHS4 (coexpressed genes)	6.81208	upregulated
FOXG1 human tf ARCHS4 coexpression	3.69305	57.9269	3.73424e-06	1.54143e-07	['CELF3', 'SEZ6', 'DLL1', 'GLI3', 'SOX1', 'TMEM169', 'SLITRK2', 'DPYSL5', 'MAP2', 'ENC1', 'SIX3', 'CTNNA2', 'OTX1', 'FEZF2', 'FEZF1', 'EPHA4', 'POU3F2', 'DLK1', 'MN1', 'LIX1', 'LHX2', 'FEZ1', 'FXYD6', 'SP8', 'ASTN1']	ARCHS4 (coexpressed genes)	6.81208	upregulated
POU3F4 human tf ARCHS4 coexpression	3.69305	57.9269	3.73424e-06	1.54143e-07	['SEMA5B', 'CELF3', 'GREB1L', 'SOX21', 'TSPAN11', 'SOX1', 'TMEM169', 'DACH1', 'DPYSL5', 'MAP2', 'NNAT', 'MAP6', 'SOX9', 'CTNNA2', 'IRX1', 'IRX2', 'PCDH8', 'NR2F1', 'NR2F2', 'POU3F2', 'MAPK10', 'MN1', 'FEZ1', 'ID4', 'ZNF677']	ARCHS4 (coexpressed genes)	6.81208	upregulated
P300 19829295 ChIP-Seq ESCs Human	1.93663	29.981	3.88552e-06	1.89091e-07	['PCSK2', 'CITED2', 'HHIP', 'PRSS23', 'PALM2-AKAP2', 'GLI3', 'CTGF', 'CDH6', 'GRM3', 'DACH1', 'GLIPR2', 'TRIM29', 'LRRTM1', 'ENC1', 'SIX3', 'ANKRD1', 'CTSF', 'STK32A', 'FEZF2', 'FEZF1', 'GUCY1A3', 'EPHA4', 'EDN1', 'MSX2', 'OLIG3', 'IGFBP3', 'WNT5A', 'C8ORF4', 'SOX14', 'TMEM173', 'POU3F1', 'TM4SF1', 'ARL4C', 'GREM1', 'MN1', 'SFRP1', 'COL2A1', 'LIX1', 'PAPPA', 'ADAM12', 'ALDH1A1', 'FAM84A', 'PKP1',…	ChEA (experimentally validated targets)	6.72333	upregulated
SUZ12 K562 hg19	2.02158	35.542	6.23495e-06	2.31496e-08	['FHOD3', 'SEMA5B', 'MOXD1', 'NRP2', 'CITED2', 'MEGF11', 'LAMC2', 'SOX21', 'PRSS23', 'MEOX1', 'HAPLN1', 'CDH6', 'NIPAL4', 'GLIPR2', 'PLAU', 'BOC', 'ENC1', 'RSPO2', 'RSPO3', 'BAALC', 'ME3', 'NRCAM', 'SOX9', 'FEZF2', 'PKNOX2', 'WLS', 'IL11', 'NOG', 'TMEM40', 'PAX3', 'KRT7', 'PAX6', 'EBF4', 'SHISA2', 'COX6B2', 'GREM1', 'HCK', 'FNDC1', 'HAND1', 'LY6D', 'PKP1', 'ZNF677', 'RHCG', 'SCN4B', 'KANK4', 'DGK…	ENCODE (experimentally validated targets)	7.63546	upregulated
UBF1/2 26484160 Chip-Seq HMEC-DERIVED Human	1.90864	28.2644	7.3732e-06	3.70396e-07	['COL16A1', 'HPSE2', 'HSPB7', 'GLI3', 'HAPLN1', 'CYP26B1', 'TRIM29', 'PLAU', 'FAM198B', 'ZIC1', 'CYP1B1', 'PKNOX2', 'WLS', 'SAMD11', 'KRT6A', 'LMO1', 'GUCY1A3', 'C11ORF87', 'PRMT8', 'IGFBP5', 'LMO3', 'WNT5A', 'EMP1', 'KRT7', 'PAX6', 'KRT5', 'EBF4', 'POU3F1', 'POU3F2', 'ARL4C', 'SFRP1', 'COL2A1', 'CYP26C1', 'HAND1', 'S100A3', 'RHCG', 'FJX1', 'KANK4', 'HMX2', 'CAMK1G', 'PTGES', 'COL17A1', 'FOXC2', …	ChEA (experimentally validated targets)	6.43133	upregulated
BNC2 human tf ARCHS4 coexpression	3.52483	50.6487	1.30828e-05	5.74875e-07	['NNMT', 'LUM', 'LRRC17', 'WNT5A', 'FN1', 'LTBP2', 'NID2', 'COL1A1', 'DAZL', 'MFAP5', 'COL3A1', 'CCDC80', 'COL1A2', 'FAP', 'COL5A1', 'CRISPLD2', 'PALLD', 'ITGA11', 'HMCN2', 'ITGBL1', 'SNAI2', 'GAS1', 'ALPK2', 'TRIM55']	ARCHS4 (coexpressed genes)	6.24043	upregulated
INSM1 human tf ARCHS4 coexpression	3.52483	50.6487	1.30828e-05	5.74875e-07	['SEMA5B', 'PRMT8', 'BTBD17', 'WFIKKN1', 'CABP7', 'CELF3', 'PAX6', 'POU3F2', 'TSPAN11', 'ADGRG1', 'TMEM169', 'DACH1', 'DPYSL5', 'MAP2', 'LHX2', 'SIX3', 'NNAT', 'SLIT1', 'MAP6', 'RSPO3', 'LHX5', 'CTNNA2', 'RHBDL3', 'DRD2']	ARCHS4 (coexpressed genes)	6.24043	upregulated
NFE2L2 human tf ARCHS4 coexpression	3.52483	50.6487	1.30828e-05	5.74875e-07	['CDKN2B', 'IL1R1', 'EPAS1', 'RRAD', 'GPR68', 'TACSTD2', 'EMP1', 'SGMS2', 'TNF', 'FOSL2', 'NIPAL4', 'IFIH1', 'C15ORF48', 'IL1A', 'THBD', 'MAFB', 'TRIM29', 'FAM198B', 'CYP1B1', 'RAB7B', 'GBP2', 'MGLL', 'IER3', 'GBP3']	ARCHS4 (coexpressed genes)	6.24043	upregulated
HEYL human tf ARCHS4 coexpression	3.52483	50.6487	1.30828e-05	5.74875e-07	['C11ORF96', 'NNMT', 'EPAS1', 'AC027612.6', 'HTRA3', 'LRRC17', 'HSPB7', 'FN1', 'LTBP2', 'PALM2-AKAP2', 'MYLPF', 'MFAP5', 'SMOC2', 'JPH2', 'CCDC80', 'ABLIM3', 'PALLD', 'ITGA11', 'ANKRD1', 'ITGBL1', 'SNAI2', 'CSPG4', 'IP6K3', 'TRIM55']	ARCHS4 (coexpressed genes)	6.24043	upregulated
CBX2 K562 hg19	1.96478	31.7652	1.92298e-05	9.5197e-08	['MOXD1', 'HPSE2', 'UCMA', 'BNC1', 'SLC44A2', 'PLEKHB1', 'RAX', 'SOX21', 'PRSS23', 'MEOX1', 'NIPAL4', 'JPH2', 'DACH1', 'LRRTM1', 'ENC1', 'ZIC1', 'ME3', 'NRCAM', 'CCDC92', 'ZNF521', 'PAMR1', 'EDN1', 'PRMT8', 'OSR1', 'TNFRSF19', 'NOG', 'EMP1', 'PAX3', 'PAX6', 'FOXL1', 'EBF4', 'RUNX1', 'EPN3', 'GREM1', 'HCK', 'CRISPLD2', 'PAPPA', 'DSG3', 'ALPK2', 'RHCG', 'SCN4B', 'DGKI', 'CAMK1G', 'PTGES', 'C11ORF96…	ENCODE (experimentally validated targets)	7.02138	upregulated
ZNF217 24962896 ChIP-Seq MCF-7 Human	1.98843	27.446	1.955e-05	1.0128e-06	['HPSE2', 'BNC1', 'CITED2', 'PRSS23', 'GLI3', 'LFNG', 'CDH6', 'CYP26B1', 'ENC1', 'BAALC', 'ME3', 'NRCAM', 'ITGB6', 'SOX9', 'TGM2', 'EPHA4', 'EDN1', 'EDN3', 'MSX2', 'IL1R1', 'IGFBP3', 'OSR1', 'EMP1', 'KRT7', 'FOXL1', 'DKK1', 'TM4SF1', 'RUNX1', 'ARL4C', 'MAF', 'CCDC80', 'CRISPLD2', 'PALLD', 'ADAM12', 'FAM84A', 'PKP1', 'RHCG', 'MGLL', 'CFTR', 'SEMA3C', 'LUZP2', 'GLIS3', 'GATA3', 'VTCN1', 'P2RY6', 'A…	ChEA (experimentally validated targets)	5.99448	upregulated
UBF1/2 26484160 Chip-Seq HMECs Human	1.85314	25.0289	2.47972e-05	1.36248e-06	['COL16A1', 'BNC1', 'PLEKHB1', 'LRRC4', 'TNFAIP3', 'SOX21', 'LOXL2', 'ZIC2', 'PLAU', 'ANPEP', 'ENC1', 'FAM198B', 'SOX9', 'FGFBP3', 'BAHCC1', 'PKNOX2', 'IER3', 'KRT6A', 'C11ORF87', 'OSR1', 'WNT5A', 'KRT7', 'PAX6', 'FOXL1', 'KRT5', 'SHISA2', 'SERPINB7', 'C6ORF141', 'POU3F1', 'ARL4C', 'GPR162', 'MAF', 'PSG5', 'PALLD', 'ADAM12', 'FAM84A', 'PKP1', 'FJX1', 'KANK4', 'DSC3', 'CRB2', 'COL17A1', 'FBLN7', '…	ChEA (experimentally validated targets)	5.86567	upregulated
OLIG2 26023283 ChIP-Seq AINV15 Mouse	1.85314	25.0289	2.47972e-05	1.36248e-06	['FHOD3', 'MOXD1', 'NRP2', 'WFIKKN1', 'MEGF11', 'HHIP', 'CELF3', 'PLEKHB1', 'MSLN', 'SOX21', 'MEOX1', 'GLI3', 'ACTG2', 'LFNG', 'CDH6', 'CYP26B1', 'DACH1', 'SOX1', 'DPYSL5', 'PLAU', 'ANPEP', 'ENC1', 'BLNK', 'CYP1B1', 'TIMP3', 'BAALC', 'ME3', 'SOX9', 'CTSF', 'BAHCC1', 'PKNOX2', 'EDN1', 'PRMT8', 'IGFBP3', 'WNT5A', 'SOX14', 'TMEM40', 'PAX6', 'EBF4', 'SHISA2', 'SORCS2', 'POU3F2', 'NPAS4', 'ARL4C', 'MN…	ChEA (experimentally validated targets)	5.86567	upregulated
WT1 25993318 ChIP-Seq PODOCYTE Human	1.66721	22.2814	2.77791e-05	1.56994e-06	['FHOD3', 'SEMA5B', 'HPSE2', 'HHIP', 'PLEKHB1', 'SOX21', 'CDH6', 'DACH1', 'DPYSL5', 'TRIM29', 'CYP1B1', 'CCDC92', 'BAHCC1', 'PAMR1', 'PKNOX2', 'IER3', 'TGM2', 'LMO1', 'EPHA4', 'IGFBP5', 'OSR1', 'SOX14', 'PDYN', 'POU3F1', 'RUNX1', 'MAF', 'LMX1A', 'PAPPA', 'ADAM12', 'ERP27', 'ASTN1', 'NECAB2', 'PKDCC', 'CRABP2', 'COL13A1', 'NPR3', 'ILDR2', 'LTBP2', 'SCUBE3', 'MAP6', 'NKX6-1', 'TRPM3', 'WNT10A', 'PH…	ChEA (experimentally validated targets)	5.80412	upregulated
SMAD4 21799915 ChIP-Seq A2780 Human	1.7654	23.3974	3.02069e-05	1.75456e-06	['SEMA5B', 'HPSE2', 'ACTG2', 'CTGF', 'BAALC', 'NRCAM', 'SOX9', 'STK32A', 'SLC16A4', 'OSR1', 'LMO3', 'WNT5A', 'PDYN', 'POU3F2', 'CCDC80', 'FNDC1', 'LMX1A', 'LIX1', 'PKP1', 'DGKI', 'ASTN1', 'PKDCC', 'EPAS1', 'TACSTD2', 'GLIS3', 'ILDR2', 'LIN7A', 'VTCN1', 'CUZD1', 'NID2', 'CDH23', 'NKX6-1', 'TRPM3', 'CPA4', 'TMEM132C', 'WNT10A', 'MUC16', 'WSCD2', 'C5ORF38', 'MICAL2', 'ZFHX4', 'ITGA11', 'SP8', 'TGFBI…	ChEA (experimentally validated targets)	5.75583	upregulated
AHR 22903824 ChIP-Seq MCF-7 Human	2.44946	32.1303	3.36975e-05	2.01021e-06	['CRB2', 'SEMA3C', 'CITED2', 'SLC44A2', 'CPXM2', 'LEF1', 'LIN7A', 'DLL1', 'CDH6', 'P2RY6', 'ABLIM3', 'CYP1B1', 'AGR3', 'HES1', 'NRCAM', 'ITGB6', 'ZNF662', 'TFAP2A', 'EPHA4', 'EDN1', 'IGFBP5', 'MSX2', 'OSR1', 'FN1', 'NR2F2', 'KRT5', 'C6ORF141', 'DHRS2', 'FOSL2', 'RUNX1', 'POU3F4', 'ARL4C', 'CRISPLD2', 'SYT10', 'ADAM12', 'CYP1A1', 'ID4', 'TGFBI', 'TRIM55']	ChEA (experimentally validated targets)	5.69676	upregulated
NEUROD4 human tf ARCHS4 coexpression	3.35849	43.9893	4.33557e-05	2.04943e-06	['PRMT8', 'PKDCC', 'TMEM132E', 'BTBD17', 'WFIKKN1', 'OLIG3', 'CELF3', 'GREB1L', 'FIGNL2', 'SORCS2', 'POU3F2', 'TSPAN11', 'POU3F4', 'TMEM169', 'DACH1', 'TH', 'DPYSL5', 'MAP2', 'NNAT', 'MAP6', 'LHX5', 'RHBDL3', 'DRD2']	ARCHS4 (coexpressed genes)	5.68837	upregulated
FEZF2 human tf ARCHS4 coexpression	3.35849	43.9893	4.33557e-05	2.04943e-06	['CRB2', 'CDSN', 'TNXB', 'BTBD17', 'WFIKKN1', 'MSLN', 'MEOX1', 'SORCS2', 'TSPAN11', 'DLK1', 'SCEL', 'UPK1B', 'SOX1', 'CDH20', 'LHX2', 'SMOC1', 'BOC', 'ZIC1', 'MAP6', 'GAS1', 'LHX5', 'SP8', 'BNIPL']	ARCHS4 (coexpressed genes)	5.68837	upregulated
ZIC4 human tf ARCHS4 coexpression	3.35849	43.9893	4.33557e-05	2.04943e-06	['CRB2', 'BTBD17', 'WFIKKN1', 'CELF3', 'ZIC5', 'SORCS2', 'SRCIN1', 'DLK1', 'GPR162', 'SOX1', 'DPYSL5', 'LHX2', 'FEZ1', 'BOC', 'SIX3', 'MAP6', 'OTX2', 'SP8', 'FEZF1', 'ZNF521', 'TRPM3', 'ASTN1', 'LRRC4B']	ARCHS4 (coexpressed genes)	5.68837	upregulated
ZIC1 human tf ARCHS4 coexpression	3.35849	43.9893	4.33557e-05	2.04943e-06	['CRB2', 'IRX1', 'TMEM132C', 'PCDHGB6', 'CELF3', 'ATP1A2', 'SORCS2', 'SRCIN1', 'TSPAN11', 'GPR162', 'SOX1', 'COL1A2', 'DPYSL5', 'MAP2', 'CDH20', 'FEZ1', 'BOC', 'SIX3', 'MAP6', 'CTNNA2', 'NPTX1', 'VIM', 'LRRC4B']	ARCHS4 (coexpressed genes)	5.68837	upregulated
CHD7 human tf ARCHS4 coexpression	3.35849	43.9893	4.33557e-05	2.04943e-06	['EPHA4', 'ZNF253', 'BTBD17', 'SKIDA1', 'GREB1L', 'ILDR2', 'POU3F2', 'DLL1', 'GLI3', 'PRTG', 'MAPK10', 'SOX1', 'DACH1', 'ZIC2', 'DPYSL5', 'MAP2', 'LHX2', 'BOC', 'MAP6', 'FXYD6', 'RHBDL3', 'FEZF1', 'SDK2']	ARCHS4 (coexpressed genes)	5.68837	upregulated
CBX8 K562 hg19	1.90864	28.2644	5.98561e-05	3.70396e-07	['FHOD3', 'SEMA5B', 'MOXD1', 'HPSE2', 'UCMA', 'BNC1', 'PLEKHB1', 'LAMC2', 'SOX21', 'NIPAL4', 'DACH1', 'LRRTM1', 'ENC1', 'RSPO2', 'NRCAM', 'CCDC92', 'ZNF521', 'PAMR1', 'PKNOX2', 'SAMD11', 'EDN1', 'MSX2', 'OLIG3', 'OSR1', 'TNFRSF19', 'TMEM40', 'EMP1', 'PAX3', 'PAX6', 'EBF4', 'POU3F2', 'HCK', 'ETV3L', 'CHI3L2', 'PKP1', 'DSG3', 'ALPK2', 'RHCG', 'SCN4B', 'CAMK1G', 'PTGES', 'C11ORF96', 'FBLN7', 'FOXC1'…	ENCODE (experimentally validated targets)	6.43133	upregulated
SUZ12 H1-hESC hg19	1.76335	25.4067	7.44523e-05	5.52863e-07	['HPSE2', 'GPR68', 'RAX', 'SOX21', 'LOXL2', 'SOX1', 'DUOXA1', 'CYP1B1', 'BAHCC1', 'WLS', 'SAMD11', 'GUCY1A3', 'C11ORF87', 'MSX2', 'SLC30A2', 'IGFBP3', 'OSR1', 'SOX14', 'KRT7', 'EBF4', 'SRCIN1', 'POU3F2', 'LMX1A', 'ADAM12', 'CERCAM', 'ZNF677', 'KANK4', 'DSC3', 'C11ORF96', 'FBLN7', 'BEAN1', 'CRABP2', 'EPAS1', 'RRAD', 'NPR3', 'ALOX15', 'GLIS3', 'LTBP2', 'GATA3', 'C17ORF96', 'WNT6', 'MAP2', 'OTX2', '…	ENCODE (experimentally validated targets)	6.25738	upregulated
ZFP281 27345836 Chip-Seq ESCs Mouse	1.79828	22.0481	7.73292e-05	4.73444e-06	['PCSK2', 'NRP2', 'WFIKKN1', 'CITED2', 'SERPINE1', 'PLEKHB1', 'LAMC2', 'SOX21', 'GLI3', 'LFNG', 'TGM1', 'ZIC2', 'DPYSL5', 'CYP1B1', 'RSPO3', 'SOX9', 'FEZF1', 'BAHCC1', 'PKNOX2', 'TGM2', 'EPHA4', 'IL11', 'PRMT8', 'IGFBP5', 'MSX2', 'WNT5A', 'SOX14', 'TMEM40', 'PAX6', 'FOXL1', 'COX6B2', 'SORCS2', 'POU3F2', 'ARL4C', 'COL2A1', 'CYP26C1', 'LMX1A', 'CLDN9', 'ASTN1', 'SHANK1', 'PKDCC', 'CRABP2', 'COL13A1…	ChEA (experimentally validated targets)	5.32473	upregulated
SMAD3 21741376 ChIP-Seq EPCs Human	1.8618	21.959	0.000120173	7.54618e-06	['PCSK2', 'PTPRT', 'NRP2', 'CDKN1B', 'CITED2', 'PTPRO', 'MEOX1', 'GLI3', 'HAPLN1', 'CDH6', 'GRM3', 'DACH1', 'GLIPR2', 'ANPEP', 'LRRTM1', 'ENC1', 'SIX3', 'ANKRD1', 'ME3', 'ITGB6', 'SOX9', 'EPHA4', 'C11ORF87', 'EDN1', 'MSX2', 'IGFBP3', 'TNFRSF19', 'C8ORF4', 'EMP1', 'PAX6', 'SHISA2', 'PDYN', 'SEZ6L', 'DKK1', 'POU3F2', 'TM4SF1', 'MN1', 'MAF', 'LMX1A', 'HAND1', 'PKP1', 'CAMK1G', 'DSC3', 'FBN2', 'FOXC1…	ChEA (experimentally validated targets)	5.12227	upregulated
PLEK2 human tf ARCHS4 coexpression	3.19401	37.9237	0.000127736	6.9736e-06	['COL17A1', 'LGALS3BP', 'ANXA8L1', 'TNFRSF6B', 'COL13A1', 'LAMB3', 'BNC1', 'LAMA3', 'KRT7', 'LAMC2', 'KRT5', 'PRSS23', 'PTHLH', 'NT5E', 'KRT17', 'GJB3', 'PLAU', 'KRT14', 'ANXA8', 'C19ORF33', 'S100A3', 'KRT6A']	ARCHS4 (coexpressed genes)	5.15654	upregulated
RARG human tf ARCHS4 coexpression	3.19401	37.9237	0.000127736	6.9736e-06	['COL17A1', 'ANXA8L1', 'ECM1', 'CDSN', 'COL16A1', 'CRABP2', 'SEMA3C', 'TACSTD2', 'EMP1', 'GRHL3', 'KRT5', 'TGM1', 'EPN3', 'KRT17', 'RAB25', 'TRIM29', 'GJB3', 'KRT14', 'LY6D', 'PKP1', 'ANXA8', 'DSG3']	ARCHS4 (coexpressed genes)	5.15654	upregulated
RFX3 human tf ARCHS4 coexpression	3.19401	37.9237	0.000127736	6.9736e-06	['EPHA4', 'SEMA5B', 'PCDHGB6', 'BTBD17', 'GREB1L', 'ILDR2', 'FOXJ1', 'TTC29', 'POU3F2', 'MAPK10', 'TMEM169', 'DACH1', 'DPYSL5', 'MAP2', 'FEZ1', 'BOC', 'MAP6', 'CTNNA2', 'FEZF1', 'CAPS', 'ASTN1', 'CFAP77']	ARCHS4 (coexpressed genes)	5.15654	upregulated
HIF1A human tf ARCHS4 coexpression	3.19401	37.9237	0.000127736	6.9736e-06	['SEMA3C', 'IL1R1', 'WNT5A', 'FN1', 'MICAL2', 'LTBP2', 'SGMS2', 'DKK1', 'NID2', 'FOSL2', 'LOXL2', 'COL1A1', 'GREM1', 'NT5E', 'CCDC80', 'COL5A1', 'ITGA11', 'ITGBL1', 'SNAI2', 'AC090094.1', 'TGFBI', 'IER3']	ARCHS4 (coexpressed genes)	5.15654	upregulated
TCF12 human tf ARCHS4 coexpression	3.19401	37.9237	0.000127736	6.9736e-06	['LMO1', 'SEMA5B', 'PCDHGB6', 'BTBD17', 'PAX3', 'ILDR2', 'SOX21', 'POU3F2', 'TSPAN11', 'DLL1', 'POU3F4', 'MAPK10', 'MAP2', 'FEZ1', 'SMOC1', 'BOC', 'FXYD6', 'NRCAM', 'SP8', 'SOX9', 'RHBDL3', 'ZNF521']	ARCHS4 (coexpressed genes)	5.15654	upregulated
OTX2 human tf ARCHS4 coexpression	3.19401	37.9237	0.000127736	6.9736e-06	['LGI1', 'TMEM132C', 'UCMA', 'SKIDA1', 'TPBG', 'ZIC5', 'SOX21', 'DLK1', 'PRTG', 'CYP26A1', 'LMX1A', 'ZIC2', 'FRZB', 'SIX3', 'RSPO2', 'HES1', 'MSX1', 'OTX1', 'FEZF1', 'ZNF521', 'TRPM3', 'SDK2']	ARCHS4 (coexpressed genes)	5.15654	upregulated
NHLH2 human tf ARCHS4 coexpression	3.19401	37.9237	0.000127736	6.9736e-06	['NECAB2', 'PTPRO', 'PCDH8', 'NR2F1', 'LIN7A', 'POU3F2', 'ZFHX4', 'POU3F4', 'TMEM169', 'DACH1', 'TH', 'DPYSL5', 'MAP2', 'ENC1', 'NNAT', 'SLIT1', 'MAP6', 'LHX5', 'CTNNA2', 'ZNF677', 'NKX6-1', 'DRD2']	ARCHS4 (coexpressed genes)	5.15654	upregulated
JUN human tf ARCHS4 coexpression	3.19401	37.9237	0.000127736	6.9736e-06	['C11ORF96', 'CSF1R', 'EDN1', 'FOXC1', 'CDKN1B', 'DUSP1', 'LYPD1', 'NR2F1', 'TNFAIP3', 'FOSL2', 'CTGF', 'ADGRG1', 'CYP26B1', 'RGCC', 'NNAT', 'ID4', 'ZNF503', 'HES1', 'SOX9', 'MSX1', 'FGFBP3', 'NKX6-1']	ARCHS4 (coexpressed genes)	5.15654	upregulated
SRY human tf ARCHS4 coexpression	3.19401	37.9237	0.000127736	6.9736e-06	['EPHA4', 'IRX2', 'BTBD17', 'WNT7B', 'SOX21', 'DLK1', 'CH17-296N19.1', 'SOX1', 'COL2A1', 'ZIC2', 'TMEM88', 'FRZB', 'LHX2', 'SMOC1', 'BOC', 'SIX3', 'HESX1', 'GPC3', 'OTX2', 'LHX5', 'SP8', 'FEZF1']	ARCHS4 (coexpressed genes)	5.15654	upregulated
DMRTA1 human tf ARCHS4 coexpression	3.19401	37.9237	0.000127736	6.9736e-06	['LGI1', 'EPHA4', 'HPSE2', 'BTBD17', 'WFIKKN1', 'CPXM2', 'RAX', 'GREB1L', 'ZIC5', 'SOX1', 'COL2A1', 'TMEM88', 'CDH20', 'ZIC1', 'SIX3', 'MAP6', 'OTX2', 'SP8', 'OTX1', 'FEZF2', 'FEZF1', 'SDK2']	ARCHS4 (coexpressed genes)	5.15654	upregulated
PAX9 human tf ARCHS4 coexpression	3.19401	37.9237	0.000127736	6.9736e-06	['ANXA8L1', 'ECM1', 'RRAD', 'ALOX15', 'TACSTD2', 'EMP1', 'FOXJ1', 'GRHL3', 'TGM1', 'EPN3', 'SCEL', 'RAB25', 'TRIM29', 'DUOXA1', 'LY6D', 'PKP1', 'ANXA8', 'S100A14', 'DSG3', 'RHCG', 'CAPS', 'CFAP77']	ARCHS4 (coexpressed genes)	5.15654	upregulated
ZNF571 human tf ARCHS4 coexpression	3.52483	50.6487	0.000141994	5.74875e-07	['TRAPPC3L', 'LEFTY1', 'RP11-168P6.2', 'MAGEB17', 'GATA6', 'WDR72', 'GATA4', 'CCDC129', 'CTD-2311M21.2', 'NPAP1', 'DEC1', 'NCR1', 'RP11-240B13.2', 'ATXN3', 'SLC5A9', 'ERBB4', 'GSC', 'RAB17', 'CCDC81', 'ARSE', 'LEFTY2', 'CER1', 'NODAL', 'MIXL1']	ARCHS4 (coexpressed genes)	6.24043	downregulated
GSC human tf ARCHS4 coexpression	3.52483	50.6487	0.000141994	5.74875e-07	['EOMES', 'LEFTY1', 'RP11-168P6.2', 'MAGEB17', 'GATA6', 'PCSK9', 'GATA4', 'CCDC129', 'GDF3', 'FOXQ1', 'FGF17', 'MYCT1', 'DNMT3L', 'SLC5A9', 'SOX17', 'ERBB4', 'RAB17', 'AC226119.4', 'CCDC81', 'PITX2', 'ARSE', 'CER1', 'NODAL', 'MIXL1']	ARCHS4 (coexpressed genes)	6.24043	downregulated
PAX3-FKHR 20663909 ChIP-Seq RHABDOMYOSARCOMA Human	2.02775	22.7232	0.000211154	1.35908e-05	['PCSK2', 'PTPRT', 'NRP2', 'HPSE2', 'CITED2', 'TNFAIP3', 'PRSS23', 'MEOX1', 'GRM3', 'ENC1', 'ZIC1', 'BAALC', 'ZNF385D', 'STK32A', 'LMO1', 'EPHA4', 'MSX2', 'TRPC4', 'LMO3', 'NOG', 'SOX14', 'FOXL1', 'POU3F1', 'RUNX1', 'ARL4C', 'MN1', 'HCK', 'MAF', 'CCDC80', 'FAM84A', 'GAS1', 'PKP1', 'TLR4', 'CAMK1G', 'SEMA3C', 'LUZP2', 'EPAS1', 'ALOX15', 'VTCN1', 'PTHLH', 'NTF3', 'TRPM3', 'IRX1', 'TGFB2', 'NR2F1', …	ChEA (experimentally validated targets)	4.86676	upregulated
EP300 20729851 ChIP-Seq FORBRAIN MIDBRAIN LIMB HEART Mouse	1.73195	19.3116	0.000217982	1.43725e-05	['SEMA5B', 'CITED2', 'HHIP', 'PTPRO', 'HSPB7', 'LAMC2', 'SOX21', 'ACTG2', 'CTGF', 'CYP26B1', 'DACH1', 'SOX1', 'ZIC2', 'GLIPR2', 'ENC1', 'ZIC1', 'ANKRD1', 'TIMP3', 'NRCAM', 'SOX9', 'FEZF2', 'BAHCC1', 'TGM2', 'LMO1', 'EPHA4', 'MSX2', 'DUSP1', 'IL1R1', 'TNFRSF19', 'NOG', 'WNT5A', 'TMEM40', 'EMP1', 'PAX3', 'SEZ6L', 'POU3F1', 'POU3F2', 'POU3F4', 'MN1', 'MAF', 'LIX1', 'MFNG', 'HAND1', 'GAS1', 'TRIM55',…	ChEA (experimentally validated targets)	4.84247	upregulated
SA1 22415368 ChIP-Seq MEFs Mouse	1.74405	19.3116	0.000230034	1.55282e-05	['SEMA5B', 'NRP2', 'PCDHGB6', 'CITED2', 'PLEKHB1', 'GLI3', 'HAPLN1', 'THBD', 'TMEM88', 'GLIPR2', 'ENC1', 'FAM198B', 'RSPO2', 'TIMP3', 'RSPO3', 'ME3', 'SOX9', 'IER3', 'TGM2', 'EPHA4', 'EDN1', 'IGFBP5', 'DUSP1', 'IGFBP3', 'OSR1', 'NOG', 'WNT5A', 'FOXL1', 'SORCS2', 'ARL4C', 'MAF', 'PAPPA', 'ADAM12', 'LY6D', 'CERCAM', 'GAS1', 'LTB', 'FJX1', 'FOXC1', 'COL13A1', 'NPR3', 'LTBP2', 'DLL1', 'CST6', 'GNA15'…	ChEA (experimentally validated targets)	4.80888	upregulated
ATOH8 human tf ARCHS4 coexpression	3.03136	32.4265	0.000350142	2.26124e-05	['TNXB', 'COL16A1', 'PCDHGB5', 'EPAS1', 'HSPB7', 'FN1', 'LTBP2', 'PALM2-AKAP2', 'AQP1', 'LOXL2', 'GREM1', 'SMOC2', 'CCDC80', 'COL1A2', 'COL5A1', 'PALLD', 'SMOC1', 'ITGBL1', 'CTSF', 'PAMR1', 'MGLL']	ARCHS4 (coexpressed genes)	4.64565	upregulated
FOXS1 human tf ARCHS4 coexpression	3.03136	32.4265	0.000350142	2.26124e-05	['C11ORF96', 'FOXC2', 'HTRA3', 'FN1', 'MICAL2', 'ATP1A2', 'FOXL1', 'CTGF', 'TMEM265', 'SMOC2', 'COL5A1', 'FRZB', 'GPER1', 'ITGA11', 'SNAI2', 'CSPG4', 'HES1', 'NKX6-1', 'FJX1', 'SCN4B', 'MGLL']	ARCHS4 (coexpressed genes)	4.64565	upregulated
KLF5 human tf ARCHS4 coexpression	3.03136	32.4265	0.000350142	2.26124e-05	['COL17A1', 'CDKN2B', 'TACSTD2', 'GRHL3', 'IL22RA1', 'SCEL', 'RAB25', 'TRIM29', 'GJB3', 'ANPEP', 'DUOXA1', 'AGR2', 'LY6D', 'AGR3', 'PKP1', 'ANXA8', 'S100A14', 'DSG3', 'NECTIN4', 'DSC3', 'GBP3']	ARCHS4 (coexpressed genes)	4.64565	upregulated
FEZF1 human tf ARCHS4 coexpression	3.03136	32.4265	0.000350142	2.26124e-05	['EPHA4', 'BTBD17', 'WFIKKN1', 'SKIDA1', 'GREB1L', 'ZIC5', 'TTC29', 'ZFHX4', 'DLK1', 'TMEM169', 'ZIC2', 'DPYSL5', 'LHX2', 'SIX3', 'HESX1', 'MAP6', 'RSPO3', 'OTX2', 'SP8', 'ZNF521', 'CFAP77']	ARCHS4 (coexpressed genes)	4.64565	upregulated
ZMAT3 human tf ARCHS4 coexpression	3.03136	32.4265	0.000350142	2.26124e-05	['COL16A1', 'PCDHGB5', 'KCNA1', 'LRRC17', 'FN1', 'MICAL2', 'LTBP2', 'NID2', 'LOXL2', 'CTGF', 'COL1A1', 'GREM1', 'COL3A1', 'CCDC80', 'COL1A2', 'COL5A1', 'PALLD', 'ITGA11', 'ITGBL1', 'PAMR1', 'DGKI']	ARCHS4 (coexpressed genes)	4.64565	upregulated
OTP human tf ARCHS4 coexpression	3.03136	32.4265	0.000350142	2.26124e-05	['LMO1', 'IRX1', 'LUZP2', 'CELF3', 'PCDH8', 'COX6B2', 'POU3F2', 'TSPAN11', 'MEIS2', 'POU3F4', 'DPYSL5', 'MAP2', 'FEZ1', 'ENC1', 'NNAT', 'SLIT1', 'MAP6', 'LHX5', 'CTNNA2', 'STK32A', 'RP11-343C2.9']	ARCHS4 (coexpressed genes)	4.64565	upregulated
TBX20 human tf ARCHS4 coexpression	3.03136	32.4265	0.000350142	2.26124e-05	['FHOD3', 'FBN2', 'TGFB2', 'PKDCC', 'RRAD', 'HSPB7', 'PALM2-AKAP2', 'NID2', 'TBX18', 'SFRP1', 'JPH2', 'COL3A1', 'COL2A1', 'COL5A1', 'PALLD', 'HAND1', 'PDE3A', 'ANKRD1', 'ALPK2', 'DGKI', 'TRIM55']	ARCHS4 (coexpressed genes)	4.64565	upregulated
PRDM16 human tf ARCHS4 coexpression	3.03136	32.4265	0.000350142	2.26124e-05	['CRB2', 'LGI1', 'SEMA5B', 'BTBD17', 'WFIKKN1', 'TSPAN11', 'GLI3', 'DLK1', 'SOX1', 'COL2A1', 'FRZB', 'CDH20', 'BOC', 'ZIC1', 'SIX3', 'MAP6', 'OTX2', 'SP8', 'FEZF2', 'ZNF521', 'SDK2']	ARCHS4 (coexpressed genes)	4.64565	upregulated
ELK3 human tf ARCHS4 coexpression	3.03136	32.4265	0.000350142	2.26124e-05	['COL13A1', 'GPR68', 'SERPINE1', 'NPR3', 'FN1', 'MICAL2', 'EMP1', 'F13A1', 'DAPP1', 'LTBP2', 'PRSS23', 'RUNX1', 'LOXL2', 'GREM1', 'NT5E', 'ABLIM3', 'PLAU', 'TGFBI', 'VIM', 'ADGRL4', 'TGM2']	ARCHS4 (coexpressed genes)	4.64565	upregulated
LHX9 human tf ARCHS4 coexpression	3.03136	32.4265	0.000350142	2.26124e-05	['NECAB2', 'C11ORF87', 'BTBD17', 'CELF3', 'NR2F1', 'GREB1L', 'ZFHX4', 'MEIS2', 'ADGRG1', 'TMEM169', 'DACH1', 'DPYSL5', 'MAP2', 'LHX2', 'ZIC1', 'MAP6', 'RSPO3', 'LHX5', 'RHBDL3', 'FEZF1', 'ZNF521']	ARCHS4 (coexpressed genes)	4.64565	upregulated
VAX1 human tf ARCHS4 coexpression	3.03136	32.4265	0.000350142	2.26124e-05	['EPHA4', 'MOXD1', 'BTBD17', 'WFIKKN1', 'WNT7B', 'C5ORF38', 'PAX3', 'MEOX1', 'DLK1', 'SOX1', 'ZIC2', 'CDH20', 'LHX2', 'SMOC1', 'BOC', 'ZIC1', 'SP8', 'FEZF2', 'FEZF1', 'ZNF521', 'RP11-343C2.9']	ARCHS4 (coexpressed genes)	4.64565	upregulated
IRX2 human tf ARCHS4 coexpression	3.03136	32.4265	0.000350142	2.26124e-05	['PCSK2', 'CRB2', 'IRX1', 'SEMA5B', 'TENM2', 'PCDHGB6', 'C5ORF38', 'PCDH8', 'NR2F1', 'GREB1L', 'SOX21', 'POU3F2', 'POU3F4', 'FAP', 'DPYSL5', 'ID4', 'MAP6', 'CNTN4', 'FGFBP3', 'NKX6-1', 'WNT4']	ARCHS4 (coexpressed genes)	4.64565	upregulated
OLIG1 human tf ARCHS4 coexpression	3.03136	32.4265	0.000350142	2.26124e-05	['VIPR2', 'TMEM132E', 'MEGF11', 'PCDHGC4', 'PLEKHB1', 'ATP1A2', 'EBF4', 'SEZ6L', 'SRCIN1', 'GPR162', 'ADGRG1', 'CDH20', 'FEZ1', 'SMOC1', 'SLIT1', 'BAALC', 'FXYD6', 'CTSF', 'RHBDL3', 'ASTN1', 'LRRC4B']	ARCHS4 (coexpressed genes)	4.64565	upregulated
TFAP2C human tf ARCHS4 coexpression	3.03136	32.4265	0.000350142	2.26124e-05	['TFAP2A', 'C5ORF46', 'ANXA8L1', 'PPP1R14C', 'CRABP2', 'MSX2', 'SEMA3C', 'TACSTD2', 'TINCR', 'GATA3', 'VTCN1', 'GLI3', 'EFNA1', 'EPN3', 'RAB25', 'GAS1', 'SOX9', 'RBBP8NL', 'DSC3', 'ATP6V1B1', 'BNIPL']	ARCHS4 (coexpressed genes)	4.64565	upregulated
IRX5 human tf ARCHS4 coexpression	3.03136	32.4265	0.000350142	2.26124e-05	['TFAP2A', 'IRX1', 'IRX2', 'CDKN1B', 'PCDHGB6', 'CRABP2', 'SEMA3C', 'C5ORF38', 'PCDH8', 'TACSTD2', 'WNT7A', 'GATA3', 'VTCN1', 'EFNA1', 'EPN3', 'ADGRG1', 'LMX1A', 'SOX9', 'NECTIN4', 'FJX1', 'ATP6V1B1']	ARCHS4 (coexpressed genes)	4.64565	upregulated
GATA3 SK-N-SH hg19	2.05231	25.8029	0.000400052	3.4658e-06	['BNC1', 'CITED2', 'CTGF', 'TMEM88', 'PLAU', 'ANKRD1', 'ME3', 'EDN1', 'IGFBP3', 'OSR1', 'TNFRSF19', 'EMP1', 'KRT7', 'TMEM173', 'DKK1', 'TM4SF1', 'RUNX1', 'CCDC80', 'LIX1', 'PAPPA', 'CHI3L2', 'GAS1', 'RHCG', 'C5ORF46', 'NNMT', 'SEMA3C', 'RRAD', 'LYPD1', 'GATA3', 'ABLIM3', 'SLITRK6', 'ZBED2', 'HES1', 'GBP2', 'CPA4', 'LGI1', 'TGFB2', 'LAMB3', 'LUM', 'TPBG', 'NR2F1', 'KCNJ15', 'C4ORF26', 'ZFHX4', 'ME…	ENCODE (experimentally validated targets)	5.4602	upregulated
RELA 24523406 ChIP-Seq FIBROSARCOMA Human	1.88693	18.5382	0.000783349	5.41089e-05	['PCSK2', 'SERPINE1', 'TNFAIP3', 'TNF', 'LFNG', 'IFIH1', 'TGM1', 'UPK1B', 'PLAU', 'BLNK', 'NRCAM', 'SOX9', 'IER3', 'TGM2', 'IL11', 'EDN1', 'DUSP1', 'MMP1', 'KRT5', 'PDYN', 'TMEM173', 'SRCIN1', 'IL1A', 'PAPPA', 'S100A3', 'LTB', 'RHCG', 'MGLL', 'TRIM55', 'PTGES', 'NNMT', 'LEF1', 'CXCR5', 'ATP1A2', 'GATA3', 'NOD2', 'PTHLH', 'P2RY6', 'AGR2', 'CDH23', 'HES1', 'ZNF467', 'LAMB3', 'NOS2', 'TPBG', 'FN1', …	ChEA (experimentally validated targets)	4.26673	upregulated
STAT3 19079543 ChIP-ChIP MESCs Mouse	1.9849	19.2219	0.00088143	6.22674e-05	['FBN2', 'FOXC2', 'NRP2', 'PCDHGB6', 'PCDHGB5', 'LEF1', 'RAX', 'GLIS3', 'GATA3', 'SOX21', 'PRSS23', 'WNT6', 'JPH2', 'FRZB', 'DUOXA1', 'ENC1', 'SIX3', 'ZIC1', 'CYP1B1', 'ME3', 'MSX1', 'FEZF2', 'PKNOX2', 'LGI1', 'TMEM132E', 'WNT7B', 'OSR1', 'NR2F1', 'PAX6', 'NR2F2', 'FOXL1', 'ZIC5', 'UPK3B', 'POU3F2', 'FOSL2', 'ARL4C', 'SFRP1', 'EPGN', 'MAFB', 'CCDC80', 'LHX2', 'LHX5', 'SP8', 'SDK2']	ChEA (experimentally validated targets)	4.20574	upregulated
ESR1 21235772 ChIP-Seq MCF-7 Human	3.21758	31.0462	0.000893103	6.44941e-05	['EDN1', 'CRABP2', 'VWF', 'C1ORF21', 'VTCN1', 'C6ORF141', 'DHRS2', 'DLL1', 'TM4SF1', 'EFNA1', 'CRISPLD2', 'CLDN9', 'ENC1', 'CYP1A1', 'CYP1B1', 'HES1', 'TGFBI']	ChEA (experimentally validated targets)	4.19048	upregulated
SOX8 human tf ARCHS4 coexpression	2.87052	27.4725	0.000988362	6.97512e-05	['VIPR2', 'TMEM132E', 'PCDHGB5', 'MEGF11', 'PCDHGC4', 'PLEKHB1', 'ATP1A2', 'EBF4', 'SEZ6L', 'GPR162', 'ADGRG1', 'CDH20', 'FEZ1', 'SMOC1', 'SLIT1', 'BAALC', 'FXYD6', 'RHBDL3', 'ASTN1', 'LRRC4B']	ARCHS4 (coexpressed genes)	4.15645	upregulated
HOXC8 human tf ARCHS4 coexpression	2.87052	27.4725	0.000988362	6.97512e-05	['FOXC1', 'COL16A1', 'FN1', 'LTBP2', 'PALM2-AKAP2', 'LOXL2', 'COL1A1', 'GREM1', 'MFAP5', 'JPH2', 'NT5E', 'CCDC80', 'COL1A2', 'COL5A1', 'ITGA11', 'CERCAM', 'TMEM119', 'ITGBL1', 'TGFBI', 'IP6K3']	ARCHS4 (coexpressed genes)	4.15645	upregulated
MYT1 human tf ARCHS4 coexpression	2.87052	27.4725	0.000988362	6.97512e-05	['SEMA5B', 'CELF3', 'SORCS2', 'SRCIN1', 'GPR162', 'ADGRG1', 'TMEM169', 'DPYSL5', 'MAP2', 'LHX2', 'FEZ1', 'ZIC1', 'SIX3', 'SLIT1', 'MAP6', 'FXYD6', 'LHX5', 'CTNNA2', 'RHBDL3', 'ASTN1']	ARCHS4 (coexpressed genes)	4.15645	upregulated
OLIG2 human tf ARCHS4 coexpression	2.87052	27.4725	0.000988362	6.97512e-05	['VIPR2', 'TMEM132E', 'PCDHGB5', 'MEGF11', 'PCDHGC4', 'PLEKHB1', 'ATP1A2', 'EBF4', 'SEZ6L', 'GPR162', 'ADGRG1', 'CDH20', 'FEZ1', 'SMOC1', 'SLIT1', 'BAALC', 'FXYD6', 'RHBDL3', 'ASTN1', 'LRRC4B']	ARCHS4 (coexpressed genes)	4.15645	upregulated
MEOX1 human tf ARCHS4 coexpression	2.87052	27.4725	0.000988362	6.97512e-05	['TMEM132C', 'FZD2', 'TNXB', 'PKDCC', 'VWF', 'HTRA3', 'HSPB7', 'PALM2-AKAP2', 'AQP1', 'SMOC2', 'WNT11', 'ABLIM3', 'BOC', 'SIX3', 'GAS1', 'FEZF2', 'SCN4B', 'MGLL', 'RP11-343C2.9', 'KANK4']	ARCHS4 (coexpressed genes)	4.15645	upregulated
FOXF2 human tf ARCHS4 coexpression	2.87052	27.4725	0.000988362	6.97512e-05	['C11ORF96', 'FOXC1', 'HTRA3', 'NR2F1', 'FN1', 'ATP1A2', 'NR2F2', 'FOXL1', 'NID2', 'TBX18', 'GREM1', 'FRZB', 'GPER1', 'SNAI2', 'ZNF503', 'CSPG4', 'HES1', 'NKX6-1', 'PAMR1', 'MGLL']	ARCHS4 (coexpressed genes)	4.15645	upregulated
SALL3 human tf ARCHS4 coexpression	2.87052	27.4725	0.000988362	6.97512e-05	['LUZP2', 'SKIDA1', 'GDPD2', 'WNT7A', 'ILDR2', 'ZIC5', 'SEZ6L', 'POU3F2', 'TSPAN11', 'SFRP1', 'ZIC2', 'SLITRK2', 'MAP2', 'LIX1', 'OTX2', 'HES1', 'SOX9', 'OTX1', 'ZNF521', 'SDK2']	ARCHS4 (coexpressed genes)	4.15645	upregulated
OLIG3 human tf ARCHS4 coexpression	2.87052	27.4725	0.000988362	6.97512e-05	['NECAB2', 'TMEM132C', 'TPBG', 'NR2F1', 'FIGNL2', 'NR2F2', 'POU3F1', 'POU3F2', 'POU3F4', 'SOX1', 'DACH1', 'ZIC2', 'ZIC1', 'NNAT', 'ID4', 'MAP6', 'RHBDL3', 'DRD2', 'SDK2', 'CAMK1G']	ARCHS4 (coexpressed genes)	4.15645	upregulated
ZNF248 human tf ARCHS4 coexpression	2.87052	27.4725	0.000988362	6.97512e-05	['GABRA2', 'EPHA4', 'PRMT8', 'PTPRO', 'CELF3', 'SOX14', 'SEZ6L', 'GRM3', 'MAPK10', 'GPR162', 'TMEM169', 'DPYSL5', 'MAP2', 'FEZ1', 'HMCN2', 'MAP6', 'FXYD6', 'CTNNA2', 'CAMK1G', 'ASTN1']	ARCHS4 (coexpressed genes)	4.15645	upregulated
SMC1 22415368 ChIP-Seq MEFs Mouse	1.66386	15.6424	0.00111975	8.26193e-05	['PTPRT', 'FHOD3', 'NRP2', 'CITED2', 'PLEKHB1', 'TNFAIP3', 'PRSS23', 'CTGF', 'THBD', 'JPH2', 'CYP26B1', 'DPYSL5', 'TMEM88', 'GLIPR2', 'BOC', 'ENC1', 'FAM198B', 'TIMP3', 'RSPO3', 'BAALC', 'ANXA8', 'SOX9', 'FGFBP3', 'STK32A', 'BAHCC1', 'EPHA4', 'EDN1', 'IGFBP5', 'DUSP1', 'IGFBP3', 'NOG', 'WNT5A', 'FOXL1', 'SRCIN1', 'RUNX1', 'ARL4C', 'MAF', 'PAPPA', 'TNNT3', 'LY6D', 'GAS1', 'S100A3', 'LTB', 'FJX1', …	ChEA (experimentally validated targets)	4.08292	upregulated
CJUN 26792858 Chip-Seq BT549 Human	1.63743	14.5303	0.00182003	0.000140002	['ZNF253', 'COL16A1', 'TNFRSF6B', 'WFIKKN1', 'CITED2', 'SERPINE1', 'LAMC2', 'TSPAN11', 'PALM2-AKAP2', 'GLI3', 'CTGF', 'LOXL2', 'GRM3', 'RSPO2', 'ME3', 'ITGB6', 'SOX9', 'FGFBP3', 'IER3', 'IGFBP5', 'DUSP1', 'WNT5A', 'EMP1', 'TMEM173', 'TM4SF1', 'RUNX1', 'C15ORF48', 'CCDC80', 'CRISPLD2', 'PAPPA', 'ADAM12', 'ALDH1A1', 'CHI3L2', 'PKP1', 'DSG3', 'ALPK2', 'TRIM55', 'PTGES', 'CRB2', 'NNMT', 'COL13A1', 'S…	ChEA (experimentally validated targets)	3.85387	upregulated
SMC3 22415368 ChIP-Seq MEFs Mouse	1.63743	14.5303	0.00182003	0.000140002	['FHOD3', 'SEMA5B', 'NRP2', 'CITED2', 'PLEKHB1', 'TNFAIP3', 'HAPLN1', 'CTGF', 'THBD', 'JPH2', 'CYP26B1', 'TMEM88', 'DUOXA1', 'ENC1', 'FAM198B', 'RSPO2', 'CYP1B1', 'TIMP3', 'RSPO3', 'BAALC', 'SOX9', 'FGFBP3', 'PKNOX2', 'TGM2', 'EPHA4', 'EDN1', 'IGFBP5', 'DUSP1', 'IGFBP3', 'OSR1', 'NOG', 'WNT5A', 'EBF4', 'SORCS2', 'RUNX1', 'ARL4C', 'MN1', 'CCDC80', 'LIX1', 'PAPPA', 'TNNT3', 'LY6D', 'GAS1', 'LTB', '…	ChEA (experimentally validated targets)	3.85387	upregulated
AR 19668381 ChIP-Seq PC3 Human	1.49589	13.1596	0.00192572	0.000151155	['FHOD3', 'VIPR2', 'HPSE2', 'F13A1', 'SOX21', 'CTGF', 'LOXL2', 'DACH1', 'DPYSL5', 'BAALC', 'NRCAM', 'SOX9', 'PKNOX2', 'SAMD11', 'TGM2', 'GUCY1A3', 'EPHA4', 'IGFBP5', 'MSX2', 'IL1R1', 'CACNA2D4', 'PDYN', 'POU3F1', 'POU3F4', 'SFRP1', 'MAF', 'LMX1A', 'CRISPLD2', 'MFNG', 'PAPPA', 'RHCG', 'DGKI', 'DSC3', 'PTGES', 'FBN2', 'CSF1R', 'NNMT', 'CRABP2', 'EPAS1', 'LIN7A', 'VTCN1', 'NID2', 'CDH23', 'MAP6', 'N…	ChEA (experimentally validated targets)	3.82058	upregulated
TP63 19390658 ChIP-ChIP HaCaT Human	3.37561	29.2915	0.00212825	0.000170394	['TFAP2A', 'MSX2', 'CITED2', 'LEF1', 'MEIS2', 'RUNX1', 'LMX1A', 'ID2', 'PLAGL1', 'HAND1', 'OTX2', 'OTX1', 'NKX6-1', 'PKNOX2']	ChEA (experimentally validated targets)	3.76855	upregulated
ESR2 21235772 ChIP-Seq MCF-7 Human	2.40756	20.6767	0.002282	0.000186286	['EDN1', 'TGFB2', 'VWF', 'WNT7B', 'GREB1L', 'C1ORF21', 'VTCN1', 'C6ORF141', 'DHRS2', 'DLL1', 'EFNA1', 'P2RY6', 'CLDN9', 'CRISPLD2', 'ENC1', 'CYP1A1', 'ANKRD1', 'CYP1B1', 'HES1', 'SOX9', 'CCDC92', 'IER3', 'PTGES', 'TGM2']	ChEA (experimentally validated targets)	3.72982	upregulated
SOX2 20726797 ChIP-Seq SW620 Human	1.55326	13.2334	0.00239755	0.000199482	['FHOD3', 'NRP2', 'COL16A1', 'CLIC3', 'SLC44A2', 'SERPINE1', 'PTPRO', 'F13A1', 'MSLN', 'PRSS23', 'LOXL2', 'TRIM29', 'PLAU', 'ENC1', 'CYP1B1', 'CCDC92', 'SLC16A4', 'KRT6A', 'TGM2', 'EPHA4', 'EDN1', 'TNFRSF19', 'KRT7', 'PAX6', 'CACNA2D4', 'C6ORF141', 'UPK3B', 'RUNX1', 'EPN3', 'PALLD', 'MFNG', 'ALDH1A1', 'S100A3', 'RAB7B', 'FJX1', 'TLR4', 'MGLL', 'CFTR', 'COL17A1', 'FOXC1', 'NNMT', 'CRABP2', 'SEMA3C…	ChEA (experimentally validated targets)	3.7001	upregulated
CTNNB1 24651522 ChIP-Seq LGR5+ INTESTINAL STEM Human	3.46682	29.1325	0.00264401	0.000224139	['CRABP2', 'TNFRSF19', 'LEF1', 'NR2F1', 'TTC29', 'GLI3', 'WNT6', 'WNT11', 'ID2', 'ANKRD1', 'S100A3', 'LHX4', 'MSX1']	ChEA (experimentally validated targets)	3.64948	upregulated
MEIS1 26253404 ChIP-Seq OPTIC CUPS Mouse	1.61115	13.4717	0.00270659	0.000233693	['PCSK2', 'SEMA5B', 'NRP2', 'HPSE2', 'PTPRO', 'TNFAIP3', 'MSLN', 'PRSS23', 'GLI3', 'LOXL2', 'DACH1', 'LRRTM1', 'ENC1', 'SIX3', 'ANKRD1', 'ME3', 'SOX9', 'STK32A', 'FEZF2', 'WLS', 'LMO1', 'EPHA4', 'IGFBP5', 'MSX2', 'LMO3', 'PAX3', 'PAX6', 'SHISA2', 'SEZ6L', 'DKK1', 'ARL4C', 'LIX1', 'FEZ1', 'ALDH1A1', 'DSG3', 'DGKI', 'DSC3', 'CRB2', 'FBN2', 'PKDCC', 'LUZP2', 'CABP7', 'NPR3', 'ALOX15', 'LIN7A', 'FLRT…	ChEA (experimentally validated targets)	3.63135	upregulated
TBX3 human tf ARCHS4 coexpression	2.71146	23.0364	0.00278965	0.000204302	['COL16A1', 'IGFBP5', 'PCDHGB5', 'IL1R1', 'EPAS1', 'CITED2', 'WNT5A', 'FN1', 'LTBP2', 'NID2', 'LOXL2', 'COL1A1', 'GREM1', 'NT5E', 'COL1A2', 'COL5A1', 'SNAI2', 'AC090094.1', 'PAMR1']	ARCHS4 (coexpressed genes)	3.68973	upregulated
EHF human tf ARCHS4 coexpression	2.71146	23.0364	0.00278965	0.000204302	['TACSTD2', 'GRHL3', 'SGMS2', 'TGM1', 'EPN3', 'SCEL', 'RAB25', 'TRIM29', 'GJB3', 'DUOXA1', 'AGR2', 'LY6D', 'PKP1', 'ANXA8', 'S100A14', 'DSG3', 'RHCG', 'NECTIN4', 'KRT6A']	ARCHS4 (coexpressed genes)	3.68973	upregulated
MYF5 human tf ARCHS4 coexpression	2.71146	23.0364	0.00278965	0.000204302	['FOXC2', 'NNMT', 'SEMA3C', 'SERPINE1', 'LRRC17', 'LTBP2', 'SHISA2', 'MYLPF', 'MFAP5', 'JPH2', 'CCDC80', 'GLIPR2', 'PALLD', 'ANKRD1', 'ITGBL1', 'SNAI2', 'TGFBI', 'IP6K3', 'TRIM55']	ARCHS4 (coexpressed genes)	3.68973	upregulated
HES2 human tf ARCHS4 coexpression	2.71146	23.0364	0.00278965	0.000204302	['COL17A1', 'ANXA8L1', 'LAMB3', 'SLC30A2', 'WNT7B', 'TMEM40', 'TINCR', 'KRT5', 'C6ORF141', 'PTHLH', 'KRT17', 'TRIM29', 'GJB3', 'KRT14', 'PKP1', 'ANXA8', 'S100A14', 'DSG3', 'KRT6A']	ARCHS4 (coexpressed genes)	3.68973	upregulated
ISL1 27105846 Chip-Seq CPCs Mouse	1.68161	13.9639	0.00281599	0.000247559	['MOXD1', 'NRP2', 'CDKN1B', 'BNC1', 'CITED2', 'HHIP', 'CELF3', 'PRSS23', 'GLI3', 'AQP1', 'IFIH1', 'CDH6', 'LRRTM1', 'ENC1', 'BAHCC1', 'WLS', 'EPHA4', 'MSX2', 'LMO3', 'WNT5A', 'SOX14', 'PAX3', 'SHISA2', 'SRCIN1', 'MN1', 'MAF', 'CYP26C1', 'LIX1', 'ADAM12', 'HAND1', 'GAS1', 'CRB2', 'FBN2', 'FOXC1', 'PKDCC', 'GREB1L', 'GATA3', 'PRTG', 'WNT11', 'FLRT3', 'FRZB', 'CDH20', 'GPC3', 'HES1', 'A2M', 'LGI1', …	ChEA (experimentally validated targets)	3.60632	upregulated
SMAD3 21741376 ChIP-Seq HESCs Human	1.6939	13.6821	0.00347018	0.000310518	['PCSK2', 'PTPRT', 'FHOD3', 'PTPRO', 'SOX21', 'UPK1B', 'GLIPR2', 'TRIM29', 'ENC1', 'ANKRD1', 'NRCAM', 'ITGB6', 'IER3', 'LMO1', 'EPHA4', 'EDN1', 'C8ORF4', 'TMEM40', 'PAX6', 'CACNA2D4', 'PDYN', 'TMEM173', 'MN1', 'SFRP1', 'MAF', 'ETV3L', 'LMX1A', 'PALLD', 'HAND1', 'ALPK2', 'TLR4', 'FBN2', 'FOXC1', 'KLHL14', 'LAMA3', 'SEZ6', 'LTBP2', 'GATA3', 'SCEL', 'RAB25', 'PLAGL1', 'NTF3', 'NNAT', 'CDH23', 'DRD2'…	ChEA (experimentally validated targets)	3.50791	upregulated
SMAD4 21741376 ChIP-Seq HESCs Human	1.51622	12.1988	0.00352038	0.000320537	['PCSK2', 'PTPRT', 'FHOD3', 'LGALS3BP', 'SEMA5B', 'NRP2', 'VIPR2', 'PTPRO', 'RAX', 'SOX21', 'GRM3', 'UPK1B', 'ZIC2', 'GLIPR2', 'TRIM29', 'BOC', 'ENC1', 'ZIC1', 'CYP1B1', 'ME3', 'NRCAM', 'ITGB6', 'ZNF385D', 'CCDC92', 'BAHCC1', 'PKNOX2', 'SAMD11', 'IER3', 'LMO1', 'GUCY1A3', 'EPHA4', 'EDN1', 'PRMT8', 'MSX2', 'TNFRSF19', 'NOG', 'SOX14', 'TMEM40', 'PAX6', 'CACNA2D4', 'PDYN', 'TMEM173', 'SORCS2', 'MN1'…	ChEA (experimentally validated targets)	3.49412	upregulated
YAP1 20516196 ChIP-Seq MESCs Mouse	1.55197	12.4085	0.00363888	0.000337039	['SEMA5B', 'RTL1', 'VIPR2', 'CITED2', 'HHIP', 'PLEKHB1', 'TNFAIP3', 'TTC29', 'TSPAN11', 'GLI3', 'HAPLN1', 'CTGF', 'AQP1', 'CDH6', 'DACH1', 'SOX1', 'DPYSL5', 'TRIM29', 'ENC1', 'BLNK', 'RSPO3', 'NRCAM', 'SOX9', 'EPHA4', 'MSX2', 'IGFBP3', 'KRT7', 'KRT5', 'SEZ6L', 'POU3F1', 'TM4SF1', 'RUNX1', 'ARL4C', 'MAF', 'CRISPLD2', 'PALLD', 'HAND1', 'DGKI', 'CAMK1G', 'FOXC1', 'LUZP2', 'EPAS1', 'LEF1', 'LYPD1', '…	ChEA (experimentally validated targets)	3.47232	upregulated
JUND 26020271 ChIP-Seq SMOOTH MUSCLE Human	1.58503	12.4651	0.00388481	0.000384212	['ANXA8L1', 'COL16A1', 'TNFRSF6B', 'WFIKKN1', 'BNC1', 'CITED2', 'SERPINE1', 'PTPRO', 'TNFAIP3', 'LAMC2', 'PALM2-AKAP2', 'LOXL2', 'IFIH1', 'NIPAL4', 'ENC1', 'FGFBP3', 'PAMR1', 'SLC16A4', 'LMO1', 'DUSP1', 'IL1R1', 'OSR1', 'TMEM40', 'KRT7', 'TMEM173', 'C6ORF141', 'DKK1', 'TM4SF1', 'RUNX1', 'NPAS4', 'SFRP1', 'PSG4', 'ADAM12', 'DSG3', 'RHCG', 'FJX1', 'KANK4', 'TRIM55', 'PTGES', 'TNXB', 'KCNA1', 'ATP10…	ChEA (experimentally validated targets)	3.41543	upregulated
SMAD2/3 21741376 ChIP-Seq EPCs Human	1.58503	12.4651	0.00388481	0.000384212	['PCSK2', 'PTPRT', 'NRP2', 'HPSE2', 'CITED2', 'HHIP', 'MEOX1', 'HAPLN1', 'GRM3', 'DACH1', 'GLIPR2', 'ANPEP', 'ENC1', 'ZIC1', 'ANKRD1', 'RSPO3', 'ME3', 'SOX9', 'CCDC92', 'ZNF521', 'PAMR1', 'EPHA4', 'C11ORF87', 'EDN1', 'PRMT8', 'IGFBP5', 'MSX2', 'IGFBP3', 'TNFRSF19', 'C8ORF4', 'TMEM40', 'EMP1', 'PAX6', 'SHISA2', 'PDYN', 'SRCIN1', 'SORCS2', 'POU3F2', 'TM4SF1', 'MN1', 'SFRP1', 'MAF', 'HAND1', 'GAS1',…	ChEA (experimentally validated targets)	3.41543	upregulated
CTCF 27219007 Chip-Seq Bcells Human	1.58503	12.4651	0.00388481	0.000384212	['PTPRT', 'FHOD3', 'COL16A1', 'UCMA', 'CPXM2', 'CELF3', 'HSPB7', 'PYGM', 'MSLN', 'SOX21', 'ACTG2', 'DPYSL5', 'TMEM88', 'SOX9', 'FGFBP3', 'SAMD11', 'LMO1', 'EPHA4', 'EDN1', 'PRMT8', 'VWF', 'PAX6', 'FOXL1', 'KRT5', 'SHISA2', 'PDYN', 'POU3F1', 'NPAS4', 'EPN3', 'MN1', 'COL2A1', 'ADAM12', 'TNNT3', 'GAS1', 'RHCG', 'CAMK1G', 'CRABP2', 'COL13A1', 'RRAD', 'KCNA1', 'LYPD1', 'IFI6', 'FIGNL2', 'KCNA5', 'LRP2…	ChEA (experimentally validated targets)	3.41543	upregulated
PBX 27287812 Chip-Seq EMBYONIC-LIMB Mouse	1.58503	12.4651	0.00388481	0.000384212	['LGALS3BP', 'NRP2', 'COL16A1', 'SLC44A2', 'SERPINE1', 'CELF3', 'PTPRO', 'HSPB7', 'PYGM', 'LAMC2', 'ACTG2', 'HAPLN1', 'LFNG', 'TGM1', 'BOC', 'ENC1', 'FAM198B', 'SIX3', 'ANKRD1', 'TIMP3', 'RSPO3', 'SOX9', 'PAMR1', 'EDN1', 'IGFBP5', 'DUSP1', 'IGFBP3', 'OSR1', 'TMEM40', 'CACNA2D4', 'SERPINB7', 'SEZ6L', 'TM4SF1', 'RUNX1', 'EPN3', 'COL2A1', 'MAF', 'CCDC80', 'CRISPLD2', 'HAND1', 'TNNT3', 'ERP27', 'SCN4…	ChEA (experimentally validated targets)	3.41543	upregulated
CEBPD 21427703 ChIP-Seq 3T3-L1 Mouse	1.6247	12.7461	0.00389802	0.000391638	['NRP2', 'CDKN1B', 'CITED2', 'PTPRO', 'TNFAIP3', 'PRSS23', 'TSPAN11', 'THBD', 'CYP26B1', 'LRRTM1', 'BOC', 'ENC1', 'FAM198B', 'CYP1B1', 'TIMP3', 'SOX9', 'BAHCC1', 'WLS', 'TGM2', 'EDN1', 'IL1R1', 'IGFBP3', 'OSR1', 'WNT5A', 'EMP1', 'TM4SF1', 'RUNX1', 'GREM1', 'MAF', 'CCDC80', 'FNDC1', 'PALLD', 'PAPPA', 'ADAM12', 'FAM84A', 'GAS1', 'DGKI', 'PKDCC', 'SEMA3C', 'HTRA3', 'LEF1', 'LRRC17', 'GLIS3', 'LIN7A'…	ChEA (experimentally validated targets)	3.40711	upregulated
OLIG2 23332759 ChIP-Seq OLIGODENDROCYTES Mouse	1.57476	12.2389	0.00412998	0.000421427	['PTPRT', 'UCMA', 'GPR68', 'CITED2', 'LRRC4', 'PRSS23', 'TSPAN11', 'GLI3', 'HAPLN1', 'CDH6', 'DPYSL5', 'LRRTM1', 'FAM198B', 'ZIC1', 'NRCAM', 'ITGB6', 'STK32A', 'EPHA4', 'IL1R1', 'OSR1', 'WNT5A', 'SHISA2', 'SEZ6L', 'POU3F4', 'COL2A1', 'MAF', 'FEZ1', 'FAM84A', 'RHCG', 'TLR4', 'KANK4', 'DGKI', 'CRB2', 'FBN2', 'NNMT', 'SEMA3C', 'KLHL14', 'LEF1', 'LRRC17', 'LYPD1', 'SGMS2', 'GATA3', 'LRP2', 'NID2', 'S…	ChEA (experimentally validated targets)	3.37528	upregulated
PRDM14 20953172 ChIP-Seq ESCs Human	1.60799	12.0914	0.00523453	0.000542354	['COL16A1', 'BNC1', 'HHIP', 'PLEKHB1', 'F13A1', 'TNFAIP3', 'ACTG2', 'CDH6', 'JPH2', 'ENC1', 'ANXA8', 'ITGB6', 'SOX9', 'ZNF385D', 'IER3', 'PRMT8', 'EDN3', 'MSX2', 'OLIG3', 'DUSP1', 'DKK1', 'SRCIN1', 'ARL4C', 'MN1', 'COL2A1', 'MAF', 'LIX1', 'PALLD', 'CLDN9', 'FEZ1', 'FAM84A', 'GAS1', 'RHCG', 'TRIM55', 'DSC3', 'NECAB2', 'HTRA3', 'LEF1', 'ATP10D', 'LIN7A', 'GATA3', 'CUZD1', 'PRTG', 'CDH20', 'NTF3', '…	ChEA (experimentally validated targets)	3.26572	upregulated
SMAD4 19686287 ChIP-ChIP HaCaT Human	2.29729	17.0618	0.00565698	0.000595004	['EDN1', 'LAMB3', 'BNC1', 'IL1R1', 'IGFBP3', 'SERPINE1', 'LYPD1', 'EMP1', 'KRT7', 'GRHL3', 'LTBP2', 'LAMC2', 'SERPINB7', 'PTHLH', 'EFNA1', 'KRT17', 'ENC1', 'KRT14', 'SNAI2', 'ITGBL1', 'PTGES', 'TGM2']	ChEA (experimentally validated targets)	3.22548	upregulated
REST 21632747 ChIP-Seq MESCs Mouse	1.52139	11.2645	0.00570251	0.000608746	['PCSK2', 'PTPRT', 'FHOD3', 'COL16A1', 'VIPR2', 'MEGF11', 'CPXM2', 'CELF3', 'PTPRO', 'LRRC4', 'SOX21', 'GLI3', 'CDH6', 'GRM3', 'CYP26B1', 'SOX1', 'DPYSL5', 'ENC1', 'BLNK', 'CYP1B1', 'NRCAM', 'LMO1', 'EPHA4', 'EDN1', 'PRMT8', 'OLIG3', 'SOX14', 'CACNA2D4', 'FOXL1', 'PDYN', 'POU3F1', 'SRCIN1', 'POU3F2', 'TM4SF1', 'NPAS4', 'ARL4C', 'MN1', 'FNDC1', 'MFNG', 'RHCG', 'TLR4', 'KANK4', 'ASTN1', 'COL17A1', …	ChEA (experimentally validated targets)	3.21556	upregulated
TCF21 26020271 ChIP-Seq SMOOTH MUSCLE Human	1.55905	11.5095	0.00574322	0.000622107	['FHOD3', 'LGALS3BP', 'SEMA5B', 'MOXD1', 'NRP2', 'COL16A1', 'TNFRSF6B', 'GPR68', 'SERPINE1', 'TNFAIP3', 'PRSS23', 'THBD', 'PLAU', 'ANPEP', 'CYP1B1', 'ITGB6', 'PAMR1', 'PKNOX2', 'TGM2', 'EDN1', 'IGFBP5', 'DUSP1', 'IL1R1', 'IGFBP3', 'C10ORF10', 'TMEM40', 'EMP1', 'KRT7', 'NPAS4', 'MN1', 'ETV3L', 'CCDC80', 'CRISPLD2', 'CLDN9', 'ADAM12', 'TNNT3', 'GAS1', 'FJX1', 'TRIM55', 'PTGES', 'PKDCC', 'NNMT', 'CR…	ChEA (experimentally validated targets)	3.20614	upregulated
TCF12 SK-N-SH hg19	2.04527	19.9697	0.00580687	5.74938e-05	['NNMT', 'SEMA3C', 'BNC1', 'RRAD', 'SERPINE1', 'LYPD1', 'GATA3', 'PRSS23', 'NID2', 'CTGF', 'PLAU', 'ZBED2', 'ANKRD1', 'ME3', 'GBP2', 'CPA4', 'LAMB3', 'LUM', 'TPBG', 'TNFRSF19', 'NR2F1', 'EMP1', 'KRT7', 'C1ORF21', 'FOSL2', 'RUNX1', 'COL1A1', 'COL3A1', 'COL1A2', 'CCDC80', 'FAP', 'COL5A1', 'PAPPA', 'ID2', 'TMEM119', 'PDE3A', 'CHI3L2', 'ITGBL1', 'VIM', 'TGFBI', 'TRIM55']	ENCODE (experimentally validated targets)	4.24038	upregulated
AR 25329375 ChIP-Seq VCAP Human	1.5662	11.4052	0.00625847	0.000687744	['PTPRT', 'NRP2', 'TNFRSF6B', 'CITED2', 'TNFAIP3', 'GLI3', 'NIPAL4', 'GLIPR2', 'TRIM29', 'ZIC1', 'BLNK', 'CYP1B1', 'ME3', 'ITGB6', 'SOX9', 'ZNF385D', 'CCDC92', 'EPHA4', 'C11ORF87', 'PRMT8', 'TRPC4', 'IGFBP3', 'LMO3', 'SOX14', 'EMP1', 'SHISA2', 'SEZ6L', 'DKK1', 'GREM1', 'MAF', 'PALLD', 'FEZ1', 'ALDH1A1', 'ZNF677', 'DSC3', 'PTGES', 'FOXC1', 'PKDCC', 'SEMA3C', 'LUZP2', 'LEF1', 'ATP10D', 'DAPP1', 'LT…	ChEA (experimentally validated targets)	3.16257	upregulated
SETDB1 19884257 ChIP-Seq MESCs Mouse	1.51078	10.9124	0.00654595	0.000729611	['SEMA5B', 'RTL1', 'COL16A1', 'RAX', 'TNFAIP3', 'SOX21', 'CTGF', 'JPH2', 'SOX1', 'ZIC2', 'GLIPR2', 'BOC', 'ENC1', 'SIX3', 'ZIC1', 'SOX9', 'FGFBP3', 'BAHCC1', 'LMO1', 'MSX2', 'DUSP1', 'OSR1', 'PAX3', 'PAX6', 'EBF4', 'SHISA2', 'PDYN', 'POU3F2', 'ARL4C', 'CYP26C1', 'PALLD', 'FEZ1', 'DSG3', 'LTB', 'KANK4', 'DGKI', 'TRIM55', 'HMX2', 'CAMK1G', 'NECAB2', 'PKDCC', 'LEF1', 'NPR3', 'ALOX15', 'TACSTD2', 'DA…	ChEA (experimentally validated targets)	3.13691	upregulated
WNT8B human tf ARCHS4 coexpression	2.55417	19.0924	0.00692485	0.000567082	['LGI1', 'BTBD17', 'TPBG', 'RAX', 'TCAF1P1', 'CH17-296N19.1', 'CDH20', 'BOC', 'RSPO2', 'RSPO3', 'OTX2', 'SP8', 'BCO1', 'FEZF1', 'ZNF521', 'WLS', 'ASTN1', 'CFAP77']	ARCHS4 (coexpressed genes)	3.24635	upregulated
LARP6 human tf ARCHS4 coexpression	2.55417	19.0924	0.00692485	0.000567082	['COL16A1', 'AC027612.6', 'PLEKHB1', 'FN1', 'MICAL2', 'LTBP2', 'SRCIN1', 'NID2', 'LOXL2', 'COL1A1', 'NT5E', 'CCDC80', 'COL1A2', 'ITGA11', 'CERCAM', 'ITGBL1', 'NPTX1', 'PAMR1']	ARCHS4 (coexpressed genes)	3.24635	upregulated
GLIS2 human tf ARCHS4 coexpression	2.55417	19.0924	0.00692485	0.000567082	['FZD2', 'COL16A1', 'EPAS1', 'FN1', 'LTBP2', 'SSC5D', 'NID2', 'TSPAN11', 'LOXL2', 'COL1A1', 'CCDC80', 'COL1A2', 'COL5A1', 'SMOC1', 'ITGA11', 'TMEM119', 'ITGBL1', 'GAS1']	ARCHS4 (coexpressed genes)	3.24635	upregulated
SETBP1 human tf ARCHS4 coexpression	2.55417	19.0924	0.00692485	0.000567082	['SEMA5B', 'KLHL14', 'CELF3', 'ILDR2', 'POU3F2', 'MEIS2', 'POU3F4', 'MAPK10', 'MN1', 'SOX1', 'DACH1', 'DPYSL5', 'FEZ1', 'BOC', 'ID4', 'FXYD6', 'CTNNA2', 'ASTN1']	ARCHS4 (coexpressed genes)	3.24635	upregulated
PBX3 human tf ARCHS4 coexpression	2.55417	19.0924	0.00692485	0.000567082	['LMO1', 'PCDHGB6', 'CELF3', 'GREB1L', 'LIN7A', 'HS3ST5', 'POU3F2', 'ZFHX4', 'POU3F4', 'MAPK10', 'TMEM169', 'DACH1', 'DPYSL5', 'MAP2', 'FEZ1', 'MAP6', 'CTNNA2', 'ZNF521']	ARCHS4 (coexpressed genes)	3.24635	upregulated
RAX human tf ARCHS4 coexpression	2.55417	19.0924	0.00692485	0.000567082	['CRB2', 'FZD2', 'SKIDA1', 'GREB1L', 'PAX6', 'C1ORF21', 'LRP2', 'SOX21', 'DLK1', 'PRTG', 'COL2A1', 'LIX1', 'SMOC1', 'OTX2', 'SP8', 'FEZF1', 'ZNF521', 'DRD4']	ARCHS4 (coexpressed genes)	3.24635	upregulated
HES1 human tf ARCHS4 coexpression	2.55417	19.0924	0.00692485	0.000567082	['LGI1', 'TMEM132C', 'TPBG', 'C8ORF4', 'LYPD1', 'NR2F1', 'C4ORF26', 'SOX21', 'CTGF', 'LMX1A', 'ID4', 'RSPO2', 'ZNF503', 'OTX2', 'SOX9', 'MSX1', 'NKX6-1', 'TRPM3']	ARCHS4 (coexpressed genes)	3.24635	upregulated
EBF3 human tf ARCHS4 coexpression	2.55417	19.0924	0.00692485	0.000567082	['IRX1', 'PCDHGB6', 'CELF3', 'PCDH8', 'NR2F1', 'POU3F2', 'TSPAN11', 'COL1A2', 'DACH1', 'DPYSL5', 'MAP2', 'ZIC1', 'SLIT1', 'MAP6', 'LHX5', 'CTNNA2', 'RHBDL3', 'DRD2']	ARCHS4 (coexpressed genes)	3.24635	upregulated
PITX1 human tf ARCHS4 coexpression	2.55417	19.0924	0.00692485	0.000567082	['ECM1', 'CDKN2A', 'NOG', 'TACSTD2', 'EMP1', 'GRHL3', 'TGM1', 'EPN3', 'SCEL', 'TRIM29', 'DUOXA1', 'LY6D', 'ANXA8', 'S100A14', 'DSG3', 'RHCG', 'PTGES', 'BNIPL']	ARCHS4 (coexpressed genes)	3.24635	upregulated
DMRT3 human tf ARCHS4 coexpression	2.55417	19.0924	0.00692485	0.000567082	['LGI1', 'EPHA4', 'LMO3', 'SKIDA1', 'TPBG', 'PAX6', 'GLI3', 'DACH1', 'TMEM88', 'LIX1', 'LHX2', 'BOC', 'RSPO2', 'SP8', 'OTX1', 'FEZF2', 'FEZF1', 'NPIPB6']	ARCHS4 (coexpressed genes)	3.24635	upregulated
TOX3 human tf ARCHS4 coexpression	2.55417	19.0924	0.00692485	0.000567082	['LMO1', 'SKIDA1', 'ILDR2', 'SOX21', 'POU3F2', 'ZFHX4', 'TSPAN11', 'POU3F4', 'SOX1', 'DACH1', 'LMX1A', 'DPYSL5', 'MAP2', 'ID4', 'MAP6', 'SP8', 'SOX9', 'OTX1']	ARCHS4 (coexpressed genes)	3.24635	upregulated
ZBED2 human tf ARCHS4 coexpression	2.55417	19.0924	0.00692485	0.000567082	['COL17A1', 'ANXA8L1', 'LAMB3', 'LAMA3', 'LAMC2', 'KRT5', 'MSLN', 'C17ORF96', 'PTHLH', 'SCEL', 'UPK1B', 'KRT17', 'GJB3', 'KRT14', 'ANXA8', 'DSG3', 'GBP2', 'KRT6A']	ARCHS4 (coexpressed genes)	3.24635	upregulated
HES4 human tf ARCHS4 coexpression	2.55417	19.0924	0.00692485	0.000567082	['CRB2', 'IRX1', 'SEMA5B', 'FOXC1', 'WFIKKN1', 'CDKN2A', 'WNT7B', 'DLK1', 'SOX1', 'COL2A1', 'CDH20', 'LHX2', 'BOC', 'ZIC1', 'SIX3', 'ZNF503', 'FJX1', 'LRRC4B']	ARCHS4 (coexpressed genes)	3.24635	upregulated
NANOG 18692474 ChIP-Seq MEFs Mouse	1.54298	10.902	0.00755572	0.000854021	['PTPRT', 'SEMA5B', 'NRP2', 'CDKN1B', 'HHIP', 'RAX', 'LAMC2', 'MSLN', 'PRSS23', 'TNF', 'CTGF', 'LFNG', 'CDH6', 'TGM1', 'ZIC2', 'ENC1', 'SIX3', 'BLNK', 'CYP1B1', 'ITGB6', 'CTSF', 'FEZF2', 'TGM2', 'EDN1', 'MSX2', 'DUSP1', 'TNFRSF19', 'WNT5A', 'PAX6', 'PDYN', 'DKK1', 'HCK', 'SFRP1', 'FNDC1', 'LIX1', 'GAS1', 'LTB', 'HMX2', 'NNMT', 'EPAS1', 'LEF1', 'SEZ6', 'DAPP1', 'SGMS2', 'GATA3', 'LRP2', 'DLL1', 'N…	ChEA (experimentally validated targets)	3.06853	upregulated
SMAD3 21741376 ChIP-Seq ESCs Human	1.53321	10.6035	0.00865568	0.000991938	['PTPRT', 'NRP2', 'COL16A1', 'CITED2', 'HSPB7', 'CTGF', 'CDH6', 'CYP26B1', 'DACH1', 'SOX1', 'TRIM29', 'LRRTM1', 'SIX3', 'NRCAM', 'ITGB6', 'SOX9', 'FGFBP3', 'ZNF521', 'SAMD11', 'PRMT8', 'VWF', 'OLIG3', 'WNT5A', 'TMEM40', 'TMEM173', 'POU3F1', 'ARL4C', 'GREM1', 'GPR162', 'MN1', 'MAF', 'CRISPLD2', 'CLDN9', 'MFNG', 'FAM84A', 'TLR4', 'MGLL', 'DGKI', 'CFTR', 'ATP6V1B1', 'FOXC1', 'PKDCC', 'KLHL14', 'ALOX…	ChEA (experimentally validated targets)	3.00352	upregulated
ZFP281 18757296 ChIP-ChIP E14 Mouse	1.52969	10.4967	0.00901122	0.00104683	['PCSK2', 'BNC1', 'CITED2', 'SERPINE1', 'PLEKHB1', 'LAMC2', 'SOX21', 'TSPAN11', 'DACH1', 'DPYSL5', 'TMEM88', 'GLIPR2', 'TIMP3', 'PRMT8', 'IGFBP5', 'MSX2', 'DUSP1', 'NOG', 'PAX6', 'COX6B2', 'ARL4C', 'EPN3', 'GPR162', 'HCK', 'COL2A1', 'GAS1', 'FJX1', 'ASTN1', 'CRABP2', 'CABP7', 'LEF1', 'ATP10D', 'GATA3', 'DLL1', 'THBS3', 'SCUBE3', 'NTF3', 'CDH23', 'HES1', 'OTX2', 'NPTX1', 'MSX1', 'OTX1', 'RHBDL3', …	ChEA (experimentally validated targets)	2.98012	upregulated
ARNT 22903824 ChIP-Seq MCF-7 Human	1.72006	11.4552	0.010884	0.00128148	['CRB2', 'SEMA3C', 'EPAS1', 'CITED2', 'SLC44A2', 'CPXM2', 'LEF1', 'LIN7A', 'DLL1', 'CDH6', 'P2RY6', 'ABLIM3', 'CYP1B1', 'AGR3', 'HES1', 'NRCAM', 'ITGB6', 'ZNF662', 'TFAP2A', 'EPHA4', 'EDN1', 'TGFB2', 'IGFBP5', 'MSX2', 'OSR1', 'FN1', 'NR2F2', 'FOXL1', 'KRT5', 'C6ORF141', 'DHRS2', 'FOSL2', 'RUNX1', 'POU3F4', 'ARL4C', 'CRISPLD2', 'SYT10', 'ADAM12', 'CYP1A1', 'ID4', 'TGFBI', 'TRIM55']	ChEA (experimentally validated targets)	2.89229	upregulated
SOX9 24532713 ChIP-Seq HFSC Mouse	1.61853	10.7551	0.0109006	0.00130054	['MOXD1', 'TENM2', 'ECM1', 'CDKN1B', 'CITED2', 'TMEM88', 'TRIM29', 'BOC', 'FAM198B', 'ANXA8', 'ME3', 'ITGB6', 'PKNOX2', 'KRT6A', 'LMO1', 'GUCY1A3', 'POU3F1', 'RUNX1', 'SFRP1', 'PALLD', 'ALDH1A1', 'PKP1', 'S100A3', 'DSG3', 'DGKI', 'PTGES', 'COL17A1', 'SEMA3C', 'PAPLN', 'LAMA3', 'SEZ6', 'VTCN1', 'SCEL', 'ABLIM3', 'GPC3', 'CDH23', 'HES1', 'RHBDL3', 'TRPM3', 'TFAP2A', 'FZD2', 'PPP1R14C', 'KCNJ15', 'M…	ChEA (experimentally validated targets)	2.88588	upregulated
LMO2 26923725 Chip-Seq HEMANGIOBLAST Mouse	1.53667	10.0972	0.0114707	0.00140061	['PTPRT', 'FHOD3', 'NRP2', 'GPR68', 'CITED2', 'ACSM1', 'HHIP', 'LRRC4', 'LAMC2', 'TTC29', 'GLI3', 'HAPLN1', 'CYP26B1', 'DACH1', 'TRIM29', 'DUOXA1', 'FAM198B', 'ANKRD1', 'RSPO3', 'GUCY1A3', 'EPHA4', 'EDN1', 'VWF', 'WNT5A', 'POU3F1', 'SRCIN1', 'SORCS2', 'RUNX1', 'POU3F4', 'ARL4C', 'GREM1', 'CYP26C1', 'CRISPLD2', 'PALLD', 'HAND1', 'ERP27', 'TLR4', 'DGKI', 'CRB2', 'FBN2', 'FOXC1', 'PKDCC', 'CABP7', '…	ChEA (experimentally validated targets)	2.85368	upregulated
SOX2 18358816 ChIP-ChIP MESCs Mouse	1.82151	11.9637	0.0114707	0.00140458	['NRP2', 'CDKN1B', 'CITED2', 'HHIP', 'RAX', 'SEZ6', 'MSLN', 'DLL1', 'NID2', 'CTGF', 'ZIC2', 'FLRT3', 'ENC1', 'HESX1', 'OTX2', 'A2M', 'EPHA4', 'EDN1', 'PRMT8', 'MSX2', 'OLIG3', 'DUSP1', 'PCDH8', 'FN1', 'TMEM40', 'PAX6', 'ZIC5', 'DKK1', 'HCK', 'SFRP1', 'GJB3', 'CRISPLD2', 'VIM', 'CAMK1G']	ChEA (experimentally validated targets)	2.85245	upregulated
FOXD4L5 human tf ARCHS4 coexpression	2.87052	27.4725	0.0114857	6.97512e-05	['TRAPPC3L', 'MORC4', 'CHMP1B2P', 'STARD8', 'CCDC129', 'C4BPB', 'PARP15', 'CTD-2311M21.2', 'NPAP1', 'DEC1', 'MAB21L3', 'SULT1B1', 'ATXN3', 'ARL17A', 'PGM5P2', 'CYSLTR1', 'GOLGA2P11', 'RP11-153M7.3', 'RP11-484L7.2', 'FSIP2']	ARCHS4 (coexpressed genes)	4.15645	downregulated
GATA4 human tf ARCHS4 coexpression	2.87052	27.4725	0.0114857	6.97512e-05	['RP4-580O19.2', 'PGAM1P2', 'LEFTY1', 'CITED1', 'MAGEB17', 'NRK', 'SLC52A3', 'GATA6', 'APOA2', 'INHBB', 'SLC5A9', 'SOX17', 'ERBB4', 'HNF4A', 'GSC', 'RAB17', 'ARSE', 'LEFTY2', 'CER1', 'PFN1P10']	ARCHS4 (coexpressed genes)	4.15645	downregulated
CDX4 human tf ARCHS4 coexpression	2.87052	27.4725	0.0114857	6.97512e-05	['HHLA1', 'MAGEB17', 'AC016577.1', 'LRRK1', 'WNT8A', 'NTS', 'CTD-2311M21.2', 'ABHD12B', 'RP11-240B13.2', 'GAL', 'T', 'DPPA2', 'SCGB3A2', 'NANOGP8', 'AC226119.4', 'GLIPR1L1', 'ARSE', 'NODAL', 'TIMP4', 'RPS6P12']	ARCHS4 (coexpressed genes)	4.15645	downregulated
P63 26484246 Chip-Seq KERATINOCYTES Human	1.50753	9.74581	0.0125574	0.00155736	['ANXA8L1', 'CDKN1B', 'COL16A1', 'BNC1', 'CITED2', 'SERPINE1', 'CELF3', 'PLEKHB1', 'PYGM', 'MSLN', 'NIPAL4', 'TGM1', 'TRIM29', 'ENC1', 'FAM198B', 'BLNK', 'ANXA8', 'ME3', 'IER3', 'LMO1', 'IL11', 'PRMT8', 'IL1R1', 'TMEM40', 'EMP1', 'KRT5', 'TMEM173', 'COX6B2', 'ARL4C', 'EPN3', 'COL2A1', 'PSG5', 'LMX1A', 'PSG4', 'PALLD', 'FEZ1', 'LY6D', 'ERP27', 'ALPK2', 'SCN4B', 'TRIM55', 'COL17A1', 'FBN2', 'SEMA3C…	ChEA (experimentally validated targets)	2.80761	upregulated
SOX9 25088423 ChIP-ChIP EMBRYONIC GONADS Mouse	1.51531	9.68943	0.0133053	0.00167099	['PTPRT', 'CLIC3', 'TNFAIP3', 'PRSS23', 'TNF', 'TSPAN11', 'GLI3', 'CTGF', 'THBD', 'CYP26B1', 'TMEM88', 'CYP1B1', 'CTSF', 'FGFBP3', 'BAHCC1', 'IER3', 'EPHA4', 'IGFBP5', 'VWF', 'TRPC4', 'PAX6', 'CACNA2D4', 'FOXL1', 'POU3F1', 'COL2A1', 'MAF', 'HAND1', 'PKP1', 'FJX1', 'CFTR', 'FBN2', 'FOXC1', 'CRABP2', 'COL13A1', 'RRAD', 'KCNA1', 'NPR3', 'THBS3', 'P2RY6', 'NT5E', 'ABLIM3', 'SLIT1', 'CDH23', 'ST8SIA6'…	ChEA (experimentally validated targets)	2.77703	upregulated
SOX11 human tf ARCHS4 coexpression	2.39862	15.615	0.0150048	0.00148849	['EPHA4', 'ZNF253', 'SKIDA1', 'PTPRO', 'SEZ6', 'SHISA2', 'POU3F2', 'DLL1', 'POU3F4', 'MAPK10', 'TMEM169', 'DPYSL5', 'MAP2', 'FEZ1', 'MAP6', 'FXYD6', 'CTNNA2']	ARCHS4 (coexpressed genes)	2.82725	upregulated
ALX4 human tf ARCHS4 coexpression	2.39862	15.615	0.0150048	0.00148849	['FOXC1', 'TGFB2', 'COL16A1', 'PKDCC', 'CDKN2A', 'LUZP2', 'NR2F1', 'TBX18', 'COL1A1', 'DAZL', 'COL3A1', 'COL1A2', 'CYP26C1', 'COL5A1', 'GAS1', 'KANK4', 'SAMD11']	ARCHS4 (coexpressed genes)	2.82725	upregulated
GLI2 human tf ARCHS4 coexpression	2.39862	15.615	0.0150048	0.00148849	['CRB2', 'FZD2', 'ZIC5', 'TSPAN11', 'GLI3', 'LOXL2', 'COL1A1', 'SFRP1', 'SOX1', 'COL2A1', 'COL5A1', 'ZIC2', 'BOC', 'SIX3', 'RHBDL3', 'HES3', 'SDK2']	ARCHS4 (coexpressed genes)	2.82725	upregulated
SOX6 human tf ARCHS4 coexpression	2.39862	15.615	0.0150048	0.00148849	['GABRA2', 'BTBD17', 'LUZP2', 'WNT7B', 'LRRC4', 'ILDR2', 'DLL1', 'MAPK10', 'SLITRK2', 'DPYSL5', 'MAP2', 'LIX1', 'LHX2', 'FEZ1', 'FXYD6', 'ZNF677', 'ASTN1']	ARCHS4 (coexpressed genes)	2.82725	upregulated
DLX2 human tf ARCHS4 coexpression	2.39862	15.615	0.0150048	0.00148849	['LMO1', 'FOXC1', 'PCDHGB6', 'LSM12P1', 'PTPRO', 'CELF3', 'RP11-613M10.8', 'TCAF1P1', 'DLL1', 'POU3F4', 'CH17-296N19.1', 'MAPK10', 'DPYSL5', 'MAP2', 'FEZ1', 'FXYD6', 'CTNNA2']	ARCHS4 (coexpressed genes)	2.82725	upregulated
SIX2 human tf ARCHS4 coexpression	2.39862	15.615	0.0150048	0.00148849	['FOXC2', 'FOXC1', 'PCDHGB6', 'RRAD', 'CDKN2A', 'FOXJ1', 'MSLN', 'COL1A1', 'JPH2', 'COL5A1', 'PALLD', 'TNNT3', 'ZIC1', 'ZNF503', 'VIM', 'CAPS', 'CFAP77']	ARCHS4 (coexpressed genes)	2.82725	upregulated
PLXNA4 human tf ARCHS4 coexpression	2.39862	15.615	0.0150048	0.00148849	['C11ORF87', 'PTPRO', 'CELF3', 'ILDR2', 'SRCIN1', 'MEIS2', 'MN1', 'DPYSL5', 'MAP2', 'ENC1', 'SLIT1', 'NRCAM', 'CTNNA2', 'ZNF385D', 'DGKI', 'PKNOX2', 'ASTN1']	ARCHS4 (coexpressed genes)	2.82725	upregulated
HAND2 human tf ARCHS4 coexpression	2.39862	15.615	0.0150048	0.00148849	['FHOD3', 'LGALS3BP', 'RTL1', 'HSPB7', 'CELF3', 'PALM2-AKAP2', 'MEIS2', 'TBX18', 'THBS3', 'COL3A1', 'TH', 'HAND1', 'ANKRD1', 'FAM84A', 'ALPK2', 'SAMD11', 'TGM2']	ARCHS4 (coexpressed genes)	2.82725	upregulated
NKX6-1 human tf ARCHS4 coexpression	2.39862	15.615	0.0150048	0.00148849	['PCSK2', 'C11ORF96', 'IRX2', 'WSCD2', 'PCDH8', 'PAX6', 'NR2F2', 'C4ORF26', 'POU3F2', 'POU3F4', 'NNAT', 'ID4', 'ZNF503', 'HES1', 'SOX9', 'CNTN4', 'WNT4']	ARCHS4 (coexpressed genes)	2.82725	upregulated
ELF5 human tf ARCHS4 coexpression	2.39862	15.615	0.0150048	0.00148849	['CRB2', 'LMO1', 'TFAP2A', 'PPP1R14C', 'CRABP2', 'SLC30A2', 'CPXM2', 'IFI6', 'GATA3', 'VTCN1', 'TM4SF1', 'EFNA1', 'EPN3', 'RAB25', 'NECTIN4', 'FJX1', 'BNIPL']	ARCHS4 (coexpressed genes)	2.82725	upregulated
BARHL1 human tf ARCHS4 coexpression	2.39862	15.615	0.0150048	0.00148849	['WSCD2', 'TPBG', 'CELF3', 'NR2F1', 'FIGNL2', 'SORCS2', 'SRCIN1', 'GPR162', 'ZIC1', 'MAP6', 'CTNNA2', 'NPTX1', 'OTX1', 'RHBDL3', 'SDK2', 'LRRC4B', 'SHANK1']	ARCHS4 (coexpressed genes)	2.82725	upregulated
ETV3 human tf ARCHS4 coexpression	2.39862	15.615	0.0150048	0.00148849	['EMP1', 'TNFAIP3', 'NOD2', 'TNF', 'C17ORF96', 'NIPAL4', 'IFIH1', 'C15ORF48', 'IL1A', 'THBD', 'MAFB', 'RGCC', 'ETV3L', 'RAB7B', 'GBP2', 'TLR4', 'IER3']	ARCHS4 (coexpressed genes)	2.82725	upregulated
MSC human tf ARCHS4 coexpression	2.39862	15.615	0.0150048	0.00148849	['CSF1R', 'GPR68', 'TNF', 'C17ORF96', 'NIPAL4', 'IFIH1', 'C15ORF48', 'IL1A', 'HCK', 'THBD', 'P2RY6', 'MAFB', 'ETV3L', 'CYP1B1', 'KCNN4', 'RAB7B', 'IER3']	ARCHS4 (coexpressed genes)	2.82725	upregulated
CSDC2 human tf ARCHS4 coexpression	2.39862	15.615	0.0150048	0.00148849	['PCDHGC4', 'PLEKHB1', 'HSPB7', 'CELF3', 'ATP1A2', 'SRCIN1', 'GPR162', 'DPYSL5', 'FEZ1', 'ANKRD1', 'FXYD6', 'NRCAM', 'CTNNA2', 'CCDC92', 'SCN4B', 'ASTN1', 'SHANK1']	ARCHS4 (coexpressed genes)	2.82725	upregulated
ZNF804A human tf ARCHS4 coexpression	2.39862	15.615	0.0150048	0.00148849	['C11ORF87', 'CABP7', 'PTPRO', 'CELF3', 'SEZ6', 'POU3F2', 'MN1', 'GNA15', 'DPYSL5', 'MAP2', 'LHX2', 'ENC1', 'SLIT1', 'CTNNA2', 'ZNF385D', 'ZNF521', 'PKNOX2']	ARCHS4 (coexpressed genes)	2.82725	upregulated
ARID5B human tf ARCHS4 coexpression	2.39862	15.615	0.0150048	0.00148849	['NNMT', 'AC027612.6', 'LUM', 'WNT5A', 'GLIS3', 'DKK1', 'CDH6', 'SCUBE3', 'CCDC80', 'PSG5', 'FAP', 'CRISPLD2', 'PALLD', 'ITGBL1', 'SNAI2', 'ALPK2', 'SLC16A4']	ARCHS4 (coexpressed genes)	2.82725	upregulated
ZNF536 human tf ARCHS4 coexpression	2.39862	15.615	0.0150048	0.00148849	['GABRA2', 'PTPRO', 'CELF3', 'PCDH8', 'ILDR2', 'SRCIN1', 'POU3F4', 'GRM3', 'MAPK10', 'DPYSL5', 'MAP2', 'FEZ1', 'FXYD6', 'NRCAM', 'CTNNA2', 'ZNF677', 'ASTN1']	ARCHS4 (coexpressed genes)	2.82725	upregulated
ZNF618 human tf ARCHS4 coexpression	2.39862	15.615	0.0150048	0.00148849	['CRB2', 'IRX1', 'SEMA5B', 'IRX2', 'NR2F2', 'TSPAN11', 'SOX1', 'DACH1', 'DPYSL5', 'LHX2', 'BOC', 'ZIC1', 'SIX3', 'MAP6', 'OTX2', 'LHX5', 'SDK2']	ARCHS4 (coexpressed genes)	2.82725	upregulated
DMRTA2 human tf ARCHS4 coexpression	2.39862	15.615	0.0150048	0.00148849	['PRMT8', 'SORCS2', 'ZFHX4', 'TMEM169', 'LMX1A', 'LHX2', 'SIX3', 'ID4', 'SLIT1', 'MAP6', 'LHX5', 'HES1', 'SOX9', 'MSX1', 'FEZF2', 'FJX1', 'SDK2']	ARCHS4 (coexpressed genes)	2.82725	upregulated
ZFHX4 human tf ARCHS4 coexpression	2.39862	15.615	0.0150048	0.00148849	['EPHA4', 'SKIDA1', 'PTPRO', 'GREB1L', 'SHISA2', 'POU3F2', 'MAPK10', 'DACH1', 'ZIC2', 'DPYSL5', 'MAP2', 'LRRTM1', 'MAP6', 'LHX5', 'CTNNA2', 'ZNF521', 'SDK2']	ARCHS4 (coexpressed genes)	2.82725	upregulated
LHX5 human tf ARCHS4 coexpression	2.39862	15.615	0.0150048	0.00148849	['PRMT8', 'WFIKKN1', 'CABP7', 'CELF3', 'ZFHX4', 'TSPAN11', 'ADGRG1', 'TMEM169', 'DPYSL5', 'LHX2', 'SIX3', 'SLIT1', 'MAP6', 'RSPO3', 'FEZF1', 'FJX1', 'LRRC4B']	ARCHS4 (coexpressed genes)	2.82725	upregulated
SOX18 human tf ARCHS4 coexpression	2.39862	15.615	0.0150048	0.00148849	['FOXC2', 'EDN1', 'TNXB', 'EPAS1', 'HHIP', 'HTRA3', 'HSPB7', 'C10ORF10', 'LTBP2', 'AQP1', 'CTGF', 'SMOC2', 'RGCC', 'GPER1', 'FAM198B', 'ADGRL4', 'MGLL']	ARCHS4 (coexpressed genes)	2.82725	upregulated
PBX1 human tf ARCHS4 coexpression	2.39862	15.615	0.0150048	0.00148849	['PCDHGB6', 'PTPRO', 'PCDH8', 'POU3F2', 'SRCIN1', 'TSPAN11', 'MAPK10', 'MN1', 'TH', 'DPYSL5', 'MAP2', 'ENC1', 'SLIT1', 'MAP6', 'CTNNA2', 'ZNF385D', 'DGKI']	ARCHS4 (coexpressed genes)	2.82725	upregulated
NR2F2 human tf ARCHS4 coexpression	2.39862	15.615	0.0150048	0.00148849	['TFAP2A', 'IRX1', 'FOXC2', 'FOXC1', 'TGFB2', 'FZD2', 'SEMA3C', 'CITED2', 'TPBG', 'NR2F1', 'NID2', 'LOXL2', 'POU3F4', 'COL5A1', 'ZNF503', 'VIM', 'WLS']	ARCHS4 (coexpressed genes)	2.82725	upregulated
NKX2-5 human tf ARCHS4 coexpression	2.39862	15.615	0.0150048	0.00148849	['FHOD3', 'FBN2', 'FOXC1', 'RRAD', 'CDKN2A', 'HSPB7', 'PALM2-AKAP2', 'TBX18', 'JPH2', 'COL2A1', 'PALLD', 'ANKRD1', 'ZNF503', 'ALPK2', 'DGKI', 'TRIM55', 'SAMD11']	ARCHS4 (coexpressed genes)	2.82725	upregulated
NEUROG1 human tf ARCHS4 coexpression	2.39862	15.615	0.0150048	0.00148849	['PHC2', 'PRMT8', 'PKDCC', 'TMEM132E', 'BTBD17', 'WFIKKN1', 'OLIG3', 'CABP7', 'CELF3', 'FIGNL2', 'SORCS2', 'THBS3', 'TMEM169', 'MAP6', 'LHX5', 'RHBDL3', 'DRD2']	ARCHS4 (coexpressed genes)	2.82725	upregulated
TP63 23658742 ChIP-Seq EP156T Human	1.37964	8.55574	0.0159373	0.00202656	['SERPINE1', 'CLEC18B', 'CTGF', 'NIPAL4', 'TRIM29', 'FAM198B', 'CYP1B1', 'BAALC', 'PAMR1', 'WLS', 'IER3', 'TGM2', 'IGFBP5', 'MSX2', 'LMO3', 'KRT5', 'POU3F1', 'DKK1', 'MAF', 'CCDC80', 'CRISPLD2', 'FEZ1', 'PKP1', 'ALPK2', 'KANK4', 'DGKI', 'DSC3', 'COL17A1', 'NECAB2', 'FBN2', 'C5ORF46', 'EPAS1', 'HTRA3', 'TACSTD2', 'GLIS3', 'FIGNL2', 'NID2', 'FLRT3', 'MAP2', 'ZBED2', 'S100A14', 'C19ORF33', 'DRD2', '…	ChEA (experimentally validated targets)	2.69324	upregulated
STAT3 24763339 ChIP-Seq IMN-ESCs Mouse	1.51353	9.25629	0.0171517	0.00220791	['FHOD3', 'NRP2', 'CITED2', 'MEGF11', 'TNFAIP3', 'LAMC2', 'TTC29', 'CDH6', 'DACH1', 'LRRTM1', 'ENC1', 'TIMP3', 'BAHCC1', 'PKNOX2', 'WLS', 'IGFBP5', 'IGFBP3', 'LMO3', 'TNFRSF19', 'EMP1', 'PAX3', 'PAX6', 'POU3F1', 'ARL4C', 'IL1A', 'MAF', 'LIX1', 'PAPPA', 'FAM84A', 'TLR4', 'FOXC1', 'PKDCC', 'EPAS1', 'LEF1', 'NPR3', 'GREB1L', 'FLRT3', 'FRZB', 'NTF3', 'HESX1', 'SLITRK6', 'ST8SIA6', 'MSX1', 'GBP2', 'RH…	ChEA (experimentally validated targets)	2.65602	upregulated
SMARCA4 23332759 ChIP-Seq OLIGODENDROCYTES Mouse	1.43407	8.65377	0.0182555	0.00239491	['PTPRT', 'SEMA5B', 'NRP2', 'CITED2', 'HHIP', 'PTPRO', 'LRRC4', 'LAMC2', 'TTC29', 'PRSS23', 'HAPLN1', 'CTGF', 'CDH6', 'TRIM29', 'LRRTM1', 'FAM198B', 'ZIC1', 'ANKRD1', 'CYP1B1', 'TIMP3', 'BAALC', 'NRCAM', 'STK32A', 'EPHA4', 'OLIG3', 'TRPC4', 'IGFBP3', 'OSR1', 'TNFRSF19', 'WNT5A', 'EMP1', 'SHISA2', 'SEZ6L', 'POU3F2', 'RUNX1', 'LMX1A', 'RHCG', 'RAB7B', 'TLR4', 'DGKI', 'FBN2', 'PKDCC', 'NNMT', 'SEMA3…	ChEA (experimentally validated targets)	2.62071	upregulated
UBF1/2 26484160 Chip-Seq FIBROBLAST Human	1.48199	8.93525	0.0182555	0.00240732	['HPSE2', 'BNC1', 'MEGF11', 'HHIP', 'F13A1', 'LAMC2', 'PRSS23', 'CTGF', 'CDH6', 'SOX1', 'FAM86B2', 'LRRTM1', 'SIX3', 'ZIC1', 'ANKRD1', 'RSPO3', 'SOX9', 'C11ORF87', 'TRPC4', 'MMP1', 'OSR1', 'WNT5A', 'SOX14', 'KRT5', 'POU3F1', 'DKK1', 'POU3F2', 'GREM1', 'LMX1A', 'ALDH1A1', 'TLR4', 'MGLL', 'KANK4', 'DGKI', 'CFTR', 'DSC3', 'SEMA3C', 'LUZP2', 'HTRA3', 'LEF1', 'LRRC17', 'SEZ6', 'GLIS3', 'LIN7A', 'ATP1A…	ChEA (experimentally validated targets)	2.61847	upregulated
SMAD2 18955504 ChIP-ChIP HaCaT Human	1.48576	8.86962	0.0189242	0.00255491	['PCDHGB6', 'PCDHGB5', 'BNC1', 'SERPINE1', 'LAMC2', 'PRSS23', 'CTGF', 'THBD', 'CYP26B1', 'UPK1B', 'PLAU', 'ENC1', 'HMCN2', 'ANKRD1', 'IER3', 'KRT6A', 'TGM2', 'EDN1', 'IGFBP3', 'EMP1', 'KRT7', 'KRT5', 'SERPINB7', 'TM4SF1', 'RUNX1', 'IL1A', 'PKP1', 'DSG3', 'RHCG', 'TRIM55', 'CAMK1G', 'PTGES', 'COL17A1', 'FOXC1', 'CRABP2', 'SEMA3C', 'LUZP2', 'LYPD1', 'TACSTD2', 'DAPP1', 'LTBP2', 'GATA3', 'NID2', 'PT…	ChEA (experimentally validated targets)	2.59262	upregulated
SMAD3 18955504 ChIP-ChIP HaCaT Human	1.48576	8.86962	0.0189242	0.00255491	['PCDHGB6', 'PCDHGB5', 'BNC1', 'SERPINE1', 'LAMC2', 'PRSS23', 'CTGF', 'THBD', 'CYP26B1', 'UPK1B', 'PLAU', 'ENC1', 'HMCN2', 'ANKRD1', 'IER3', 'KRT6A', 'TGM2', 'EDN1', 'IGFBP3', 'EMP1', 'KRT7', 'KRT5', 'SERPINB7', 'TM4SF1', 'RUNX1', 'IL1A', 'PKP1', 'DSG3', 'RHCG', 'TRIM55', 'CAMK1G', 'PTGES', 'COL17A1', 'FOXC1', 'CRABP2', 'SEMA3C', 'LUZP2', 'LYPD1', 'TACSTD2', 'DAPP1', 'LTBP2', 'GATA3', 'NID2', 'PT…	ChEA (experimentally validated targets)	2.59262	upregulated
TCF3 18347094 ChIP-ChIP MESCs Mouse	1.45026	8.51517	0.0206378	0.00281867	['PTPRT', 'SEMA5B', 'PCDHGB5', 'HHIP', 'RAX', 'TNFAIP3', 'LAMC2', 'CTGF', 'IFIH1', 'CDH6', 'UPK1B', 'DACH1', 'ZIC2', 'ZIC1', 'ANKRD1', 'ITGB6', 'BAHCC1', 'TGM2', 'EPHA4', 'EDN1', 'PRMT8', 'MSX2', 'DUSP1', 'IL1R1', 'SLC30A2', 'LMO3', 'TNFRSF19', 'NOG', 'PAX6', 'PDYN', 'COX6B2', 'DKK1', 'RUNX1', 'IL1A', 'HCK', 'SFRP1', 'GAS1', 'ASTN1', 'COL13A1', 'LEF1', 'ATP10D', 'NPR3', 'SEZ6', 'DLL1', 'NID2', 'P…	ChEA (experimentally validated targets)	2.54996	upregulated
ERG 21242973 ChIP-ChIP JURKAT Human	2.22249	12.8229	0.0225914	0.00312094	['SLC30A2', 'KCNA1', 'C5ORF38', 'NPR3', 'LRRC4', 'TACSTD2', 'F13A1', 'SOX21', 'NID2', 'CYP26B1', 'WNT11', 'LHX2', 'FAM84A', 'SP8', 'MSX1', 'DRD4', 'SAMD11']	ChEA (experimentally validated targets)	2.50571	upregulated
TRP63 18441228 ChIP-ChIP KERATINOCYTES Mouse	2.97177	17.0491	0.0230776	0.00322434	['LMO1', 'SCEL', 'WNT10A', 'EDN1', 'CYP1B1', 'TIMP3', 'HES1', 'VIM', 'CST6', 'PTGES']	ChEA (experimentally validated targets)	2.49156	upregulated
RUNX2 22187159 ChIP-Seq PCA Human	1.36156	7.64564	0.0256437	0.00364153	['HPSE2', 'HHIP', 'F13A1', 'ACTG2', 'CTGF', 'LOXL2', 'SOX1', 'DPYSL5', 'CYP1B1', 'SOX9', 'LMO1', 'EPHA4', 'C11ORF87', 'IL1R1', 'SLC30A2', 'OSR1', 'WNT5A', 'SOX14', 'EBF4', 'SHISA2', 'POU3F1', 'RUNX1', 'MAF', 'ASTN1', 'C5ORF46', 'PKDCC', 'EPAS1', 'HTRA3', 'GLIS3', 'GATA3', 'VTCN1', 'SCUBE3', 'MAP2', 'CDH20', 'NPTX1', 'A2M', 'WNT4', 'TFAP2A', 'TMEM132C', 'WNT10A', 'PHC2', 'C5ORF38', 'FN1', 'MICAL2'…	ChEA (experimentally validated targets)	2.43872	upregulated
FOXM1 26456572 ChIP-Seq MCF-7 Human	1.45659	8.17054	0.0256437	0.00366338	['GPR68', 'ACSM1', 'CELF3', 'CLEC18B', 'GLI3', 'ENC1', 'FAM198B', 'RSPO2', 'CYP1B1', 'BAALC', 'NRCAM', 'ITGB6', 'SOX9', 'FEZF2', 'BAHCC1', 'EPHA4', 'EDN1', 'IGFBP5', 'MSX2', 'IL1R1', 'IGFBP3', 'OSR1', 'TNFRSF19', 'WNT5A', 'C8ORF4', 'EMP1', 'KRT7', 'C6ORF141', 'DKK1', 'TM4SF1', 'RUNX1', 'ARL4C', 'COL2A1', 'CLDN9', 'PLSCR5', 'FAM84A', 'PKP1', 'ERP27', 'DGKI', 'CFTR', 'FOXC1', 'SEMA3C', 'LUZP2', 'AL…	ChEA (experimentally validated targets)	2.43612	upregulated
SPIC human tf ARCHS4 coexpression	2.71146	23.0364	0.0275251	0.000204302	['AIRE', 'GATA6', 'AC008810.1', 'PHKA1', 'GDF3', 'TFCP2L1', 'AL135745.1', 'FGF4', 'ABHD12B', 'CD79B', 'DNMT3L', 'PDCL3P4', 'NLRP7', 'GSC', 'DPPA2', 'NANOGP8', 'ZNF600', 'HNRNPA3P2', 'PIK3AP1']	ARCHS4 (coexpressed genes)	3.68973	downregulated
BMP2 human tf ARCHS4 coexpression	2.71146	23.0364	0.0275251	0.000204302	['LEFTY1', 'STEAP4', 'MAGEB17', 'GATA6', 'APOA2', 'PCSK9', 'WDR72', 'GATA4', 'CCT8P1', 'FOXQ1', 'FGF17', 'SOX17', 'ERBB4', 'HNF4A', 'GSC', 'RAB17', 'ARSE', 'LEFTY2', 'CER1']	ARCHS4 (coexpressed genes)	3.68973	downregulated
FOXA1 27197147 Chip-Seq ENDOMETRIOID-ADENOCARCINOMA Human	1.82828	9.95824	0.0298	0.00431018	['MOXD1', 'MEGF11', 'CELF3', 'LFNG', 'NT5E', 'DACH1', 'HES1', 'ITGB6', 'SOX9', 'BAHCC1', 'TGM2', 'EPHA4', 'IL1R1', 'OSR1', 'KCNJ15', 'C8ORF4', 'KRT7', 'C1ORF21', 'FOXL1', 'C6ORF141', 'DHRS2', 'TM4SF1', 'GREM1', 'MAFB', 'ITGBL1', 'CRYL1']	ChEA (experimentally validated targets)	2.3655	upregulated
TCF3/E2A 22897851 ChIP-Seq JUKARTE6-1 Human	1.45108	7.87628	0.0298	0.00439238	['PTPRT', 'COL16A1', 'HHIP', 'TNFAIP3', 'ACTG2', 'CDH6', 'GRM3', 'JPH2', 'DACH1', 'DPYSL5', 'LRRTM1', 'ENC1', 'ANKRD1', 'SOX9', 'IGFBP3', 'LMO3', 'NOG', 'SOX14', 'SEZ6L', 'POU3F1', 'DKK1', 'SRCIN1', 'MN1', 'COL2A1', 'MAF', 'CCDC80', 'CLDN9', 'FEZ1', 'FAM84A', 'GAS1', 'SCN4B', 'TRIM55', 'NECAB2', 'LUZP2', 'EPAS1', 'HTRA3', 'LEF1', 'TACSTD2', 'KCNA5', 'LTBP2', 'SGMS2', 'GATA3', 'NID2', 'NT5E', 'WNT…	ChEA (experimentally validated targets)	2.3573	upregulated
PIAS1 25552417 ChIP-Seq VCAP Human	1.72904	9.38304	0.0298	0.00439749	['FBN2', 'FOXC1', 'PKDCC', 'NNMT', 'KLHL14', 'CITED2', 'GATA3', 'PALM2-AKAP2', 'GLI3', 'SOX1', 'WNT11', 'FLRT3', 'ME3', 'IP6K3', 'TGM2', 'LGI1', 'MSX2', 'NOS2', 'IGFBP3', 'FOXJ1', 'C1ORF21', 'ZFHX4', 'RUNX1', 'NPAS4', 'MAFB', 'PALLD', 'PAPPA', 'ALDH1A1', 'ID4', 'ALPK2', 'CFTR']	ChEA (experimentally validated targets)	2.35679	upregulated
RARG 19884340 ChIP-ChIP MEFs Mouse	2.0367	10.9687	0.030726	0.00458237	['CRABP2', 'DUSP1', 'OSR1', 'PLEKHB1', 'FN1', 'EMP1', 'MSLN', 'NID2', 'TM4SF1', 'CTGF', 'LOXL2', 'COL1A1', 'EFNA1', 'BLNK', 'TIMP3', 'ITGBL1', 'BAALC', 'ME3', 'S100A3']	ChEA (experimentally validated targets)	2.33891	upregulated
NEUROG2 human tf ARCHS4 coexpression	2.24478	12.5778	0.033354	0.00368626	['PRMT8', 'COL13A1', 'LRRC17', 'TNFRSF19', 'C6ORF141', 'POU3F2', 'GLI3', 'THBS3', 'MN1', 'LHX2', 'NNAT', 'MAP6', 'OTX1', 'NKX6-1', 'FJX1', 'PAMR1']	ARCHS4 (coexpressed genes)	2.43341	upregulated
ZNF540 human tf ARCHS4 coexpression	2.24478	12.5778	0.033354	0.00368626	['PCSK2', 'ZNRF2P2', 'C11ORF87', 'SLC30A2', 'CELF3', 'SEZ6L', 'MEIS2', 'MAPK10', 'DPYSL5', 'MAP2', 'FEZ1', 'FXYD6', 'NRCAM', 'CTNNA2', 'CNTN4', 'ASTN1']	ARCHS4 (coexpressed genes)	2.43341	upregulated
ZNF608 human tf ARCHS4 coexpression	2.24478	12.5778	0.033354	0.00368626	['PCDHGB6', 'CELF3', 'GREB1L', 'ILDR2', 'ZFHX4', 'TSPAN11', 'TMEM169', 'DACH1', 'DPYSL5', 'MAP2', 'LHX2', 'FEZ1', 'ZIC1', 'MAP6', 'CTNNA2', 'SDK2']	ARCHS4 (coexpressed genes)	2.43341	upregulated
TEAD1 human tf ARCHS4 coexpression	2.24478	12.5778	0.033354	0.00368626	['SEMA3C', 'FN1', 'LTBP2', 'PALM2-AKAP2', 'NID2', 'LOXL2', 'COL1A1', 'JPH2', 'NT5E', 'CCDC80', 'COL1A2', 'COL5A1', 'PALLD', 'SNAI2', 'ALPK2', 'AC090094.1']	ARCHS4 (coexpressed genes)	2.43341	upregulated
EOMES human tf ARCHS4 coexpression	2.24478	12.5778	0.033354	0.00368626	['PRMT8', 'CABP7', 'WNT7B', 'LRRC4', 'HAPLN1', 'CYP26A1', 'ADGRG1', 'TMEM169', 'ZIC2', 'SIX3', 'MAP6', 'RSPO3', 'LHX5', 'FEZF1', 'FJX1', 'CFAP77']	ARCHS4 (coexpressed genes)	2.43341	upregulated
ARX human tf ARCHS4 coexpression	2.24478	12.5778	0.033354	0.00368626	['PCSK2', 'PTPRO', 'C10ORF10', 'PAX6', 'KCNA5', 'ZFHX4', 'POU3F4', 'MAPK10', 'TMEM169', 'FAP', 'DPYSL5', 'MAP2', 'FXYD6', 'CNTN4', 'XKR5', 'WNT4']	ARCHS4 (coexpressed genes)	2.43341	upregulated
FOXA2 human tf ARCHS4 coexpression	2.24478	12.5778	0.033354	0.00368626	['PCSK2', 'PTPRO', 'NR2F1', 'RP11-619A10.1', 'POU3F1', 'POU3F2', 'POU3F4', 'TH', 'LMX1A', 'ZNF503', 'HES1', 'CTNNA2', 'MSX1', 'NKX6-1', 'SDK2', 'WNT4']	ARCHS4 (coexpressed genes)	2.43341	upregulated
HOXB1 human tf ARCHS4 coexpression	2.24478	12.5778	0.033354	0.00368626	['LGI1', 'FZD2', 'CRABP2', 'BTBD17', 'MSX2', 'PCDHGC4', 'GREB1L', 'LRP2', 'PRTG', 'TMEM88', 'HAND1', 'HMCN2', 'HES3', 'KANK4', 'SDK2', 'WLS']	ARCHS4 (coexpressed genes)	2.43341	upregulated
ONECUT2 human tf ARCHS4 coexpression	2.24478	12.5778	0.033354	0.00368626	['BTBD17', 'WFIKKN1', 'CABP7', 'CELF3', 'GREB1L', 'FIGNL2', 'TMEM169', 'DACH1', 'MAP2', 'PDE3A', 'SLIT1', 'MAP6', 'RSPO3', 'LHX5', 'DRD2', 'CFTR']	ARCHS4 (coexpressed genes)	2.43341	upregulated
NFKB1 human tf ARCHS4 coexpression	2.24478	12.5778	0.033354	0.00368626	['XXBAC-BPG246D15.9', 'TNFAIP3', 'NOD2', 'TNF', 'C17ORF96', 'FOSL2', 'NIPAL4', 'IFIH1', 'C15ORF48', 'IL1A', 'HCK', 'ETV3L', 'KCNN4', 'GBP2', 'TLR4', 'IER3']	ARCHS4 (coexpressed genes)	2.43341	upregulated
HOXA9 human tf ARCHS4 coexpression	2.24478	12.5778	0.033354	0.00368626	['GUCY1A3', 'FOXC1', 'DUSP1', 'NPR3', 'TMEM173', 'RUNX1', 'GNA15', 'MFNG', 'ST8SIA6', 'AC012314.1', 'AC012314.2', 'AC012314.3', 'BAHCC1', 'AC012314.4', 'AC012314.5', 'AC012314.6']	ARCHS4 (coexpressed genes)	2.43341	upregulated
ETV1 human tf ARCHS4 coexpression	2.24478	12.5778	0.033354	0.00368626	['MEGF11', 'KCNA1', 'PCDHGC4', 'PLEKHB1', 'ILDR2', 'ATP1A2', 'SEZ6L', 'MAPK10', 'MAP2', 'FEZ1', 'SMOC1', 'ZIC1', 'BAALC', 'FXYD6', 'NRCAM', 'ASTN1']	ARCHS4 (coexpressed genes)	2.43341	upregulated
HIVEP3 human tf ARCHS4 coexpression	2.24478	12.5778	0.033354	0.00368626	['CSF1R', 'MUC16', 'GPR68', 'TNF', 'C17ORF96', 'RUNX1', 'NIPAL4', 'ARL4C', 'THBD', 'P2RY6', 'MAFB', 'RGCC', 'KCNN4', 'RAB7B', 'GBP2', 'IER3']	ARCHS4 (coexpressed genes)	2.43341	upregulated
SOX15 human tf ARCHS4 coexpression	2.24478	12.5778	0.033354	0.00368626	['COL17A1', 'ANXA8L1', 'LAMB3', 'BNC1', 'GRHL3', 'LAMC2', 'KRT5', 'PTHLH', 'KRT17', 'TRIM29', 'GJB3', 'KRT14', 'PKP1', 'ANXA8', 'RP11-544M22.13', 'KRT6A']	ARCHS4 (coexpressed genes)	2.43341	upregulated
ATF3 human tf ARCHS4 coexpression	2.24478	12.5778	0.033354	0.00368626	['C11ORF96', 'EMP1', 'TNFAIP3', 'TNF', 'C17ORF96', 'FOSL2', 'NIPAL4', 'IFIH1', 'C15ORF48', 'IL1A', 'THBD', 'MAFB', 'RGCC', 'ETV3L', 'RAB7B', 'IER3']	ARCHS4 (coexpressed genes)	2.43341	upregulated
POU4F1 human tf ARCHS4 coexpression	2.24478	12.5778	0.033354	0.00368626	['NECAB2', 'IRX1', 'IRX2', 'PCDHGB6', 'NR2F1', 'SORCS2', 'POU3F2', 'POU3F4', 'COL1A2', 'DACH1', 'DPYSL5', 'MAP2', 'ZIC1', 'MAP6', 'RHBDL3', 'GNRHR2P1']	ARCHS4 (coexpressed genes)	2.43341	upregulated
SMAD7 human tf ARCHS4 coexpression	2.24478	12.5778	0.033354	0.00368626	['CSF1R', 'GPR68', 'TNFAIP3', 'NOD2', 'TNF', 'C17ORF96', 'FOSL2', 'NIPAL4', 'ARL4C', 'THBD', 'MAFB', 'RGCC', 'CYP1B1', 'TGFBI', 'RAB7B', 'IER3']	ARCHS4 (coexpressed genes)	2.43341	upregulated
JUN 21703547 ChIP-Seq K562 Human	1.48242	7.72975	0.0360851	0.00543826	['FHOD3', 'CDKN1B', 'GPR68', 'SERPINE1', 'LRRC4', 'TTC29', 'GLI3', 'AQP1', 'LFNG', 'CDH6', 'PLAU', 'LRRTM1', 'SIX3', 'CYP1B1', 'STK32A', 'SLC16A4', 'VWF', 'MSX2', 'SOX14', 'FOXL1', 'POU3F1', 'SORCS2', 'MAF', 'PALLD', 'PAPPA', 'ADAM12', 'GAS1', 'TLR4', 'FOXC2', 'EPAS1', 'HTRA3', 'NPR3', 'LYPD1', 'GLIS3', 'KCNA5', 'GATA3', 'PTHLH', 'NT5E', 'NTF3', 'SLITRK6', 'GPC3', 'CTNNA2', 'NCAM2', 'NKX6-1', 'KC…	ChEA (experimentally validated targets)	2.26454	upregulated
CTBP2 25329375 ChIP-Seq LNCAP Human	1.58694	8.18864	0.0377046	0.00574152	['PCSK2', 'FHOD3', 'FBN2', 'SEMA3C', 'ATP1A2', 'SGMS2', 'GATA3', 'CDH6', 'GRM3', 'FLRT3', 'GLIPR2', 'CDH20', 'SLITRK6', 'ZBED2', 'TIMP3', 'SOX9', 'CTNNA2', 'NCAM2', 'TGM2', 'IRX1', 'TMEM132C', 'C11ORF87', 'TMEM132E', 'MSX2', 'MUC16', 'PLCL2', 'KCNJ15', 'ZFHX4', 'CYP26A1', 'MAFB', 'CYP26C1', 'COL5A1', 'SMOC1', 'SYT10', 'ID4', 'PDE3A', 'GAS1', 'SP8', 'FOLR1', 'TLR4']	ChEA (experimentally validated targets)	2.24097	upregulated
NANOG 18358816 ChIP-ChIP MESCs Mouse	1.52584	7.57213	0.0454663	0.00699481	['CDKN1B', 'PCDHGB6', 'CITED2', 'HHIP', 'RAX', 'SEZ6', 'DAPP1', 'LAMC2', 'MSLN', 'DLL1', 'NID2', 'CTGF', 'ZIC2', 'FLRT3', 'CDH20', 'ENC1', 'HESX1', 'ANKRD1', 'BLNK', 'OTX2', 'ITGB6', 'A2M', 'IRX1', 'LGI1', 'EDN1', 'PRMT8', 'FZD2', 'MSX2', 'PCDHGC4', 'TNFRSF19', 'FN1', 'PAX6', 'GRHL3', 'ZIC5', 'PDYN', 'DKK1', 'HCK', 'SFRP1', 'KRT17', 'GJB3', 'ID2', 'LHX5', 'VIM', 'CAMK1G', 'PTGES']	ChEA (experimentally validated targets)	2.15522	upregulated
T	2.24478	12.5778	0.218521	0.00368626	['EIF2S2P4', 'CDX4', 'EEF1A1P5', 'WNT8A', 'GDF3', 'NTS', 'CTD-2311M21.2', 'FGF4', 'ABHD12B', 'RP11-240B13.2', 'GAL', 'NANOGP8', 'GLIPR1L1', 'NODAL', 'MIXL1', 'WNT3']	ARCHS4 (coexpressed genes)	downregulated
EOMES	2.24478	12.5778	0.218521	0.00368626	['RP11-168P6.2', 'MAGEB17', 'GATA6', 'NTS', 'CTD-2311M21.2', 'FGF17', 'MAB21L3', 'MYCT1', 'RP11-51O6.1', 'SOX17', 'ERBB4', 'GSC', 'CCDC81', 'CER1', 'MIXL1', 'WNT3']	ARCHS4 (coexpressed genes)	downregulated
PRDM5	2.24478	12.5778	0.218521	0.00368626	['TRAPPC3L', 'MORC4', 'ABCC9', 'C4BPB', 'PARP15', 'CTD-2311M21.2', 'NPAP1', 'DEC1', 'RP11-226E21.4', 'SULT1B1', 'ATXN3', 'CYSLTR1', 'GOLGA2P11', 'RP11-153M7.3', 'RP11-484L7.2', 'FSIP2']	ARCHS4 (coexpressed genes)	downregulated
PRDM7	2.24478	12.5778	0.218521	0.00368626	['TRAPPC3L', 'MORC4', 'STARD8', 'C4BPB', 'PARP15', 'CTD-2311M21.2', 'NPAP1', 'DEC1', 'SULT1B1', 'ATXN3', 'ARL17A', 'CYSLTR1', 'GOLGA2P11', 'RP11-153M7.3', 'RP11-484L7.2', 'FSIP2']	ARCHS4 (coexpressed genes)	downregulated
KLF8	2.24478	12.5778	0.218521	0.00368626	['TRAPPC3L', 'MORC4', 'ABCC9', 'C4BPB', 'PARP15', 'CTD-2311M21.2', 'NPAP1', 'DEC1', 'SULT1B1', 'ATXN3', 'ARL17A', 'CYSLTR1', 'GOLGA2P11', 'RP11-153M7.3', 'RP11-484L7.2', 'FSIP2']	ARCHS4 (coexpressed genes)	downregulated
POU4F1	2.24478	12.5778	0.033354	0.00368626	['NECAB2', 'IRX1', 'IRX2', 'PCDHGB6', 'NR2F1', 'SORCS2', 'POU3F2', 'POU3F4', 'COL1A2', 'DACH1', 'DPYSL5', 'MAP2', 'ZIC1', 'MAP6', 'RHBDL3', 'GNRHR2P1']	ARCHS4 (coexpressed genes)	upregulated
SMAD7	2.24478	12.5778	0.033354	0.00368626	['CSF1R', 'GPR68', 'TNFAIP3', 'NOD2', 'TNF', 'C17ORF96', 'FOSL2', 'NIPAL4', 'ARL4C', 'THBD', 'MAFB', 'RGCC', 'CYP1B1', 'TGFBI', 'RAB7B', 'IER3']	ARCHS4 (coexpressed genes)	upregulated
ZNF562	2.24478	12.5778	0.218521	0.00368626	['TBC1D8B', 'TRAPPC3L', 'MORC4', 'ABCC9', 'C4BPB', 'PARP15', 'NPAP1', 'DEC1', 'MAB21L3', 'SULT1B1', 'ATXN3', 'ARL17A', 'CYSLTR1', 'RP11-153M7.3', 'RP11-484L7.2', 'FSIP2']	ARCHS4 (coexpressed genes)	downregulated
JUND	3.11705	17.3901	0.293783	0.00377633	['EDN1', 'ID4', 'AGR2', 'HES1', 'GATA3', 'NR2F2', 'SGMS2', 'IER3', 'FOSL2']	ENCODE (experimentally validated targets)	upregulated
FOSL2	2.1646	11.952	0.293783	0.00399952	['SEMA3C', 'LAMB3', 'LYPD1', 'TACSTD2', 'TNFAIP3', 'KRT5', 'SGMS2', 'CST6', 'GLI3', 'FOSL2', 'EFNA1', 'MAPK10', 'ANKRD1', 'AGR2', 'LY6D', 'CHI3L2', 'RHCG']	ENCODE (experimentally validated targets)	upregulated
FOXA1	1.82828	9.95824	0.0298	0.00431018	['MOXD1', 'MEGF11', 'CELF3', 'LFNG', 'NT5E', 'DACH1', 'HES1', 'ITGB6', 'SOX9', 'BAHCC1', 'TGM2', 'EPHA4', 'IL1R1', 'OSR1', 'KCNJ15', 'C8ORF4', 'KRT7', 'C1ORF21', 'FOXL1', 'C6ORF141', 'DHRS2', 'TM4SF1', 'GREM1', 'MAFB', 'ITGBL1', 'CRYL1']	ChEA (experimentally validated targets)	upregulated
TCF3/E2A	1.45108	7.87628	0.0298	0.00439238	['PTPRT', 'COL16A1', 'HHIP', 'TNFAIP3', 'ACTG2', 'CDH6', 'GRM3', 'JPH2', 'DACH1', 'DPYSL5', 'LRRTM1', 'ENC1', 'ANKRD1', 'SOX9', 'IGFBP3', 'LMO3', 'NOG', 'SOX14', 'SEZ6L', 'POU3F1', 'DKK1', 'SRCIN1', 'MN1', 'COL2A1', 'MAF', 'CCDC80', 'CLDN9', 'FEZ1', 'FAM84A', 'GAS1', 'SCN4B', 'TRIM55', 'NECAB2', 'LUZP2', 'EPAS1', 'HTRA3', 'LEF1', 'TACSTD2', 'KCNA5', 'LTBP2', 'SGMS2', 'GATA3', 'NID2', 'NT5E', 'WNT…	ChEA (experimentally validated targets)	upregulated
PIAS1	1.72904	9.38304	0.0298	0.00439749	['FBN2', 'FOXC1', 'PKDCC', 'NNMT', 'KLHL14', 'CITED2', 'GATA3', 'PALM2-AKAP2', 'GLI3', 'SOX1', 'WNT11', 'FLRT3', 'ME3', 'IP6K3', 'TGM2', 'LGI1', 'MSX2', 'NOS2', 'IGFBP3', 'FOXJ1', 'C1ORF21', 'ZFHX4', 'RUNX1', 'NPAS4', 'MAFB', 'PALLD', 'PAPPA', 'ALDH1A1', 'ID4', 'ALPK2', 'CFTR']	ChEA (experimentally validated targets)	upregulated
RARG	2.0367	10.9687	0.030726	0.00458237	['CRABP2', 'DUSP1', 'OSR1', 'PLEKHB1', 'FN1', 'EMP1', 'MSLN', 'NID2', 'TM4SF1', 'CTGF', 'LOXL2', 'COL1A1', 'EFNA1', 'BLNK', 'TIMP3', 'ITGBL1', 'BAALC', 'ME3', 'S100A3']	ChEA (experimentally validated targets)	upregulated
JUN	1.48242	7.72975	0.0360851	0.00543826	['FHOD3', 'CDKN1B', 'GPR68', 'SERPINE1', 'LRRC4', 'TTC29', 'GLI3', 'AQP1', 'LFNG', 'CDH6', 'PLAU', 'LRRTM1', 'SIX3', 'CYP1B1', 'STK32A', 'SLC16A4', 'VWF', 'MSX2', 'SOX14', 'FOXL1', 'POU3F1', 'SORCS2', 'MAF', 'PALLD', 'PAPPA', 'ADAM12', 'GAS1', 'TLR4', 'FOXC2', 'EPAS1', 'HTRA3', 'NPR3', 'LYPD1', 'GLIS3', 'KCNA5', 'GATA3', 'PTHLH', 'NT5E', 'NTF3', 'SLITRK6', 'GPC3', 'CTNNA2', 'NCAM2', 'NKX6-1', 'KC…	ChEA (experimentally validated targets)	upregulated
CTBP2	1.58694	8.18864	0.0377046	0.00574152	['PCSK2', 'FHOD3', 'FBN2', 'SEMA3C', 'ATP1A2', 'SGMS2', 'GATA3', 'CDH6', 'GRM3', 'FLRT3', 'GLIPR2', 'CDH20', 'SLITRK6', 'ZBED2', 'TIMP3', 'SOX9', 'CTNNA2', 'NCAM2', 'TGM2', 'IRX1', 'TMEM132C', 'C11ORF87', 'TMEM132E', 'MSX2', 'MUC16', 'PLCL2', 'KCNJ15', 'ZFHX4', 'CYP26A1', 'MAFB', 'CYP26C1', 'COL5A1', 'SMOC1', 'SYT10', 'ID4', 'PDE3A', 'GAS1', 'SP8', 'FOLR1', 'TLR4']	ChEA (experimentally validated targets)	upregulated
NR3C1	2.29712	11.4345	0.463896	0.00688955	['DUSP1', 'PAPLN', 'KRT7', 'EMP1', 'KRT5', 'UPK3B', 'CTGF', 'SCEL', 'JPH2', 'ANKRD1', 'HES1', 'IP6K3', 'KRT6A']	ENCODE (experimentally validated targets)	upregulated
NANOG	1.52584	7.57213	0.0454663	0.00699481	['CDKN1B', 'PCDHGB6', 'CITED2', 'HHIP', 'RAX', 'SEZ6', 'DAPP1', 'LAMC2', 'MSLN', 'DLL1', 'NID2', 'CTGF', 'ZIC2', 'FLRT3', 'CDH20', 'ENC1', 'HESX1', 'ANKRD1', 'BLNK', 'OTX2', 'ITGB6', 'A2M', 'IRX1', 'LGI1', 'EDN1', 'PRMT8', 'FZD2', 'MSX2', 'PCDHGC4', 'TNFRSF19', 'FN1', 'PAX6', 'GRHL3', 'ZIC5', 'PDYN', 'DKK1', 'HCK', 'SFRP1', 'KRT17', 'GJB3', 'ID2', 'LHX5', 'VIM', 'CAMK1G', 'PTGES']	ChEA (experimentally validated targets)	upregulated
FOSL2	1.86443	9.08833	0.467007	0.00763824	['NNMT', 'CRABP2', 'SEMA3C', 'TPBG', 'LYPD1', 'SEZ6', 'EMP1', 'FOSL2', 'CTGF', 'RUNX1', 'FAP', 'PLAU', 'PAPPA', 'ZBED2', 'ANKRD1', 'CHI3L2', 'ITGBL1', 'S100A3', 'VIM', 'GBP2', 'CPA4']	ENCODE (experimentally validated targets)	upregulated

## Sheet: vs 5iLFA H9 hESC
term_name	zscore	combined_score	FDR	pvalue	overlapping_genes	gene_set_library	geneset
ESRRB_human_tf_ARCHS4_coexpression	-2.02809	309.986	6.24049e-64	4.16588e-67	['CTD-2122P11.1', 'RPL10L', 'ATP5BP1', 'AF131215.1', 'CCT4P1', 'NPM1P8', 'HSP90AB6P', 'RPS4XP21', 'RP11-109P14.8', 'EIF4A1P6', 'RPS3AP22', 'KB-1205A7.1', 'RP11-307I14.2', 'RPS15AP9', 'RP11-214N15.5', 'RPS7P6', 'EEF1A1P10', 'RPL17P20', 'AC092569.2', 'RP11-481K9.4', 'VDAC1P2', 'RP6-218J18.2', 'EEF1A1P15', 'CTD-2061E19.1', 'RP11-166J22.1', 'RP11-343B5.1', 'RP11-388B24.4', 'PKMP2', 'RPLP1P11', 'RP11-…	ARCHS4 (coexpressed genes)	downregulated
ZNF676_human_tf_ARCHS4_coexpression	-1.83742	184.739	1.61925e-41	2.16188e-44	['KHDC3L', 'DCAF4L2', 'DDX43', 'DPPA3P2', 'RP13-492C18.2', 'AL135745.1', 'FGF4', 'SPIC', 'DNMT3L', 'ZNF728', 'ZNF727', 'ZNF208', 'MAEL', 'HYAL4', 'RNF17', 'HORMAD1', 'TRIM60', 'ZYG11A', 'ZNF560', 'ZNF98', 'PHKA1', 'ZNF99', 'RP11-807H22.6', 'ALPPL2', 'KLF17', 'ZNF92P3', 'ARGFX', 'RP11-126O22.1', 'AC078899.3', 'DPPA3', 'CDHR1', 'ZFP42', 'ZNF849P', 'AL590762.7', 'DPPA5', 'HDGFL1', 'GTSF1', 'CH507-9B…	ARCHS4 (coexpressed genes)	downregulated
NKX6-3_human_tf_ARCHS4_coexpression	-1.8834	184.562	1.3806e-40	2.76489e-43	['RPL10L', 'ATP5BP1', 'AF131215.1', 'CCT4P1', 'NPM1P8', 'RPS4XP21', 'RP11-109P14.8', 'EIF4A1P6', 'RP11-307I14.2', 'RPS15AP9', 'RP11-481K9.4', 'VDAC1P2', 'CTD-2061E19.1', 'RP11-166J22.1', 'RP11-343B5.1', 'RP11-388B24.4', 'PKMP2', 'GPX2', 'RPLP1P11', 'AC104076.2', 'ALPPL2', 'RPS4XP6', 'RP5-837J1.1', 'RP3-486I3.4', 'NCLP2', 'RPS17P2', 'RPL7P5', 'RP11-389O22.4', 'NPM1P43', 'AL590762.7', 'COX5BP1', 'R…	ARCHS4 (coexpressed genes)	downregulated
ZNF625_human_tf_ARCHS4_coexpression	-2.08653	193.968	1.58698e-38	4.23759e-41	['ZNF492', 'RPL10L', 'ATP5BP1', 'AF131215.1', 'CCT4P1', 'NPM1P8', 'RPS4XP21', 'RPS3AP22', 'KB-1205A7.1', 'RP11-307I14.2', 'RPS15AP9', 'VDAC1P10', 'RP11-356M20.1', 'RPL17P20', 'AC092569.2', 'ZNF726', 'RP11-481K9.4', 'VDAC1P2', 'RP6-218J18.2', 'CTD-2061E19.1', 'RP11-343B5.1', 'RP11-388B24.4', 'ZNF99', 'RP5-837J1.1', 'NCLP2', 'RP11-52I18.1', 'RPS17P2', 'RPL7P5', 'COX5BP1', 'LA16C-3G11.7', 'RP11-92C4…	ARCHS4 (coexpressed genes)	downregulated
SPIC_human_tf_ARCHS4_coexpression	-1.83321	161.355	1.78169e-36	5.9469e-39	['EXOC3L1', 'KRT16P3', 'KHDC3L', 'KRT16P1', 'DPPA3P2', 'TFCP2L1', 'AL135745.1', 'FGF4', 'VN1R85P', 'DNMT3L', 'ZNF728', 'ZNF727', 'ZNF208', 'HORMAD1', 'ZNF600', 'RP11-366M4.11', 'TRIM60', 'UTS2R', 'ZYG11A', 'PHKA1', 'RP11-807H22.6', 'ALPPL2', 'SLC25A16', 'TATDN2P1', 'DPPA3', 'CDHR1', 'ZFP42', 'LETM1P2', 'AL136097.1', 'DPPA5', 'HDGFL1', 'ZNF676', 'CH507-9B2.2', 'RRAD', 'AIRE', 'KHDC1L', 'AC073333.1…	ARCHS4 (coexpressed genes)	downregulated
SUZ12_20075857_ChIP-Seq_MESCs_Mouse	-0.935184	54.7717	2.29566e-23	3.66718e-26	['VIPR2', 'SCT', 'TMEM200A', 'RAX', 'IKZF1', 'SOX21', 'CLDN1', 'NIPAL4', 'SOX3', 'EDNRB', 'HTR7', 'DPYSL5', 'FAM110C', 'DPYSL3', 'PKNOX2', 'ST6GAL2', 'KRT7', 'SOX14', 'SOX11', 'DKK1', 'AR', 'SFRP2', 'CLDN3', 'MYL7', 'ASTL', 'OPTC', 'KCNQ1', 'FREM2', 'CFTR', 'ASTN1', 'NECAB2', 'SLC22A3', 'ADCYAP1R1', 'COL13A1', 'ABCB4', 'CRABP1', 'LYPD1', 'IL20RA', 'PDGFB', 'TGFA', 'THY1', 'NKAIN1', 'ADAMTS19', 'R…	ChEA (experimentally validated targets)	upregulated
SUZ12_18974828_ChIP-Seq_MESCs_Mouse	-1.755	100.296	4.74566e-23	1.51619e-25	['SEMA5A', 'FHOD3', 'SEMA5B', 'CTNND2', 'RAX', 'IKZF1', 'SOX21', 'CLDN1', 'SOX3', 'CDH4', 'EDNRB', 'HTR7', 'SALL2', 'DPYSL5', 'PCDHAC2', 'PKNOX2', 'CADPS2', 'ST6GAL2', 'SLC30A3', 'IGFBP3', 'FST', 'SOX11', 'DKK1', 'POU3F4', 'AR', 'SFRP2', 'CLDN3', 'DOK5', 'KCNQ1', 'PKP1', 'FREM2', 'DGKI', 'SLC22A3', 'ADCYAP1R1', 'NXPH2', 'COL13A1', 'CTTNBP2', 'ABCB4', 'CRABP1', 'LYPD1', 'IL20RA', 'PDGFB', 'TGFA', …	ChEA (experimentally validated targets)	upregulated
SUZ12_18692474_ChIP-Seq_MESCs_Mouse	-1.83052	95.7541	3.99633e-21	1.91517e-23	['SEMA5B', 'VIPR2', 'CTNND2', 'RAX', 'SOX21', 'SOX3', 'CDH4', 'EDNRB', 'HTR7', 'SALL2', 'DPYSL5', 'PCDHAC2', 'PKNOX2', 'CADPS2', 'ST6GAL2', 'SLC30A3', 'FST', 'SOX11', 'DKK1', 'POU3F4', 'AR', 'DOK5', 'SLCO2A1', 'PKP1', 'ROR1', 'DGKI', 'SLC22A3', 'ADCYAP1R1', 'NXPH2', 'COL13A1', 'CTTNBP2', 'ABCB4', 'CRABP1', 'SLC1A1', 'LYPD1', 'IL20RA', 'TGFA', 'LIN7A', 'RHOBTB1', 'IGSF21', 'CALCR', 'PODXL', 'ADAMT…	ChEA (experimentally validated targets)	upregulated
SUZ12_18692474_ChIP-Seq_MEFs_Mouse	-2.01584	102.941	1.03966e-20	6.64322e-23	['BARHL1', 'MOXD1', 'SEMA5B', 'FLT1', 'VIPR2', 'CTNND2', 'GRIK3', 'RAX', 'TSPAN11', 'CX3CL1', 'SOX3', 'CDH4', 'SIX6', 'EDNRB', 'HTR7', 'SALL2', 'ZIC2', 'DPYSL5', 'KIF1A', 'FOXD3', 'GRID2', 'EDN1', 'SLC30A3', 'KCND2', 'TRPC4', 'FST', 'PAX3', 'SOX11', 'GFRA1', 'SEZ6L', 'SORCS3', 'DKK1', 'ADRA2A', 'POU3F4', 'AR', 'COL2A1', 'CCKBR', 'NRG3', 'SLCO2A1', 'PKP1', 'ROR1', 'HMX2', 'SLC22A3', 'ADCYAP1R1', '…	ChEA (experimentally validated targets)	upregulated
FOXR1_human_tf_ARCHS4_coexpression	-1.89367	94.383	5.64279e-20	2.26013e-22	['KHDC3L', 'KHDC1L', 'AC073333.1', 'DDX43', 'DPPA3P2', 'AC017081.1', 'TPTE', 'RP13-492C18.2', 'AC017081.3', 'AL135745.1', 'NLRP9', 'RP11-257K9.8', 'AC109486.1', 'ZNF728', 'ZNF723P', 'MAEL', 'MKRN4P', 'C1DP2', 'TRIM60', 'TRIM61', 'TKTL1', 'ZNF705D', 'TRIM53AP', 'NAA11', 'AC008810.1', 'DNAJC15', 'ATP5F1P7', 'RP11-347H15.5', 'COX7B2', 'ALPPL2', 'OOEP', 'KLF17', 'TRIM75P', 'ARGFX', 'RP11-1217F2.22', …	ARCHS4 (coexpressed genes)	downregulated
SOX15_human_tf_ARCHS4_coexpression	-1.8324	80.4252	1.30043e-17	8.68114e-20	['KHDC3L', 'KHDC1L', 'AC073333.1', 'DDX43', 'DPPA3P2', 'AC017081.1', 'TPTE', 'RP13-492C18.2', 'AC017081.3', 'AL135745.1', 'NLRP9', 'RP11-257K9.8', 'AC109486.1', 'ZNF728', 'ZNF723P', 'NLRP4', 'NLRP2', 'MKRN4P', 'C1DP2', 'TRIM60', 'TRIM61', 'ZNF705D', 'TRIM53AP', 'NAA11', 'AC008810.1', 'DNAJC15', 'ALPPL2', 'OOEP', 'KLF17', 'TRIM75P', 'ARGFX', 'RP11-1217F2.22', 'AC078899.3', 'FAM151A', 'DPPA3', 'ZNF…	ARCHS4 (coexpressed genes)	downregulated
ZNF679_human_tf_ARCHS4_coexpression	-1.83874	80.7032	1.30043e-17	8.68114e-20	['KHDC3L', 'KHDC1L', 'AC073333.1', 'DDX43', 'DPPA3P2', 'AC017081.1', 'TPTE', 'AC017081.3', 'AL135745.1', 'RP11-257K9.8', 'AC109486.1', 'ZNF728', 'ZNF723P', 'MKRN4P', 'C1DP2', 'TRIM60', 'TRIM61', 'ZNF705D', 'TRIM53AP', 'NAA11', 'AC008810.1', 'DNAJC15', 'ATP5F1P7', 'RP11-347H15.5', 'COX7B2', 'ALPPL2', 'OOEP', 'KLF17', 'FOXR1', 'THEG', 'TRIM75P', 'ARGFX', 'RP11-1217F2.22', 'AC078899.3', 'FAM151A', '…	ARCHS4 (coexpressed genes)	downregulated
TPRX1_human_tf_ARCHS4_coexpression	-1.89456	83.1533	1.30043e-17	8.68114e-20	['KHDC3L', 'KHDC1L', 'AC073333.1', 'DPPA3P2', 'AC017081.1', 'TPTE', 'RP13-492C18.2', 'AC017081.3', 'AL135745.1', 'RP11-257K9.8', 'AC109486.1', 'ZNF728', 'ZNF723P', 'MKRN4P', 'C1DP2', 'TRIM60', 'TRIM61', 'ZNF705D', 'TAF13', 'TRIM53AP', 'NAA11', 'AC008810.1', 'DNAJC15', 'ATP5F1P7', 'RP11-347H15.5', 'ALPPL2', 'OOEP', 'KLF17', 'FOXR1', 'THEG', 'TRIM75P', 'ARGFX', 'RP11-1217F2.22', 'AC078899.3', 'FAM1…	ARCHS4 (coexpressed genes)	downregulated
DPRX_human_tf_ARCHS4_coexpression	-2.01351	88.374	1.30043e-17	8.68114e-20	['RTP3', 'KHDC3L', 'KHDC1L', 'AC073333.1', 'DPPA3P2', 'AC017081.1', 'TPTE', 'AC017081.3', 'AL135745.1', 'RP11-257K9.8', 'AC109486.1', 'ZNF728', 'ZNF723P', 'MAEL', 'MKRN4P', 'RP11-366M4.11', 'C1DP2', 'TRIM60', 'TRIM61', 'ZNF705D', 'RNASE10', 'TRIM53AP', 'NAA11', 'AC008810.1', 'DNAJC15', 'ATP5F1P7', 'RP11-347H15.5', 'COX7B2', 'KLF17', 'FOXR1', 'TRIM75P', 'ARGFX', 'RP11-1217F2.22', 'AC078899.3', 'FA…	ARCHS4 (coexpressed genes)	downregulated
MTF2_20144788_ChIP-Seq_MESCs_Mouse	-1.27194	53.8708	5.05705e-17	4.03918e-19	['SEMA5A', 'FHOD3', 'SEMA5B', 'VIPR2', 'CTNND2', 'RAX', 'IKZF1', 'SOX21', 'SOX3', 'CDH4', 'EDNRB', 'HTR7', 'PCDHAC2', 'PKNOX2', 'CADPS2', 'ST6GAL2', 'SLC30A3', 'IGFBP3', 'FST', 'SOX11', 'SHISA2', 'DKK1', 'POU3F4', 'AR', 'SFRP2', 'CLDN3', 'ASTL', 'SCNN1B', 'FEZ1', 'SLCO2A1', 'PKP1', 'ROR1', 'FREM2', 'CFTR', 'DGKI', 'ASTN1', 'SLC22A3', 'ADCYAP1R1', 'COL13A1', 'CTTNBP2', 'ABCB4', 'TMEM59L', 'CRABP1'…	ChEA (experimentally validated targets)	upregulated
ZSCAN5B_human_tf_ARCHS4_coexpression	-1.8654	78.2814	7.43258e-17	5.954e-19	['KHDC3L', 'KHDC1L', 'AC073333.1', 'DPPA3P2', 'AC017081.1', 'TPTE', 'RP13-492C18.2', 'AC017081.3', 'AL135745.1', 'RP11-257K9.8', 'AC109486.1', 'ZNF728', 'ZNF723P', 'MKRN4P', 'C1DP2', 'TRIM60', 'TRIM61', 'ZNF705D', 'TRIM53AP', 'NAA11', 'AC008810.1', 'DNAJC15', 'ATP5F1P7', 'RP11-347H15.5', 'ALPPL2', 'OOEP', 'KLF17', 'FOXR1', 'THEG', 'TRIM75P', 'ARGFX', 'RP11-1217F2.22', 'AC078899.3', 'FAM151A', 'DP…	ARCHS4 (coexpressed genes)	downregulated
DUXA_human_tf_ARCHS4_coexpression	-1.91999	80.5723	7.43258e-17	5.954e-19	['KHDC3L', 'KHDC1L', 'AC073333.1', 'DPPA3P2', 'AC017081.1', 'TPTE', 'RP13-492C18.2', 'AC017081.3', 'AL135745.1', 'RP11-257K9.8', 'AC109486.1', 'ZNF728', 'ZNF723P', 'MKRN4P', 'C1DP2', 'TRIM60', 'TRIM61', 'ZNF705D', 'TRIM53AP', 'NAA11', 'AC008810.1', 'DNAJC15', 'ATP5F1P7', 'RP11-347H15.5', 'COX7B2', 'ALPPL2', 'KLF17', 'FOXR1', 'THEG', 'TRIM75P', 'ARGFX', 'RP11-1217F2.22', 'AC078899.3', 'FAM151A', '…	ARCHS4 (coexpressed genes)	downregulated
KLF17_human_tf_ARCHS4_coexpression	-1.86437	74.7044	4.2406e-16	3.96318e-18	['KHDC3L', 'KHDC1L', 'AC073333.1', 'DPPA3P2', 'AC017081.1', 'TPTE', 'RP13-492C18.2', 'AC017081.3', 'AL135745.1', 'RP11-257K9.8', 'AC109486.1', 'ZNF728', 'ZNF723P', 'MKRN4P', 'C1DP2', 'TRIM60', 'TRIM61', 'ZNF705D', 'TRIM53AP', 'NAA11', 'AC008810.1', 'DNAJC15', 'ATP5F1P7', 'RP11-347H15.5', 'ALPPL2', 'OOEP', 'FOXR1', 'THEG', 'TRIM75P', 'ARGFX', 'RP11-1217F2.22', 'AC078899.3', 'FAM151A', 'DPPA3', 'ZN…	ARCHS4 (coexpressed genes)	downregulated
ZSCAN4_human_tf_ARCHS4_coexpression	-1.79939	72.1005	4.2406e-16	3.96318e-18	['KHDC3L', 'KHDC1L', 'AC073333.1', 'DPPA3P2', 'AC017081.1', 'TPTE', 'AC017081.3', 'AL135745.1', 'RP11-257K9.8', 'AC109486.1', 'ZNF728', 'ZNF723P', 'MKRN4P', 'C1DP2', 'TRIM60', 'TRIM61', 'ZNF705D', 'TRIM53AP', 'NAA11', 'AC008810.1', 'DNAJC15', 'ATP5F1P7', 'RP11-347H15.5', 'ALPPL2', 'OOEP', 'KLF17', 'FOXR1', 'THEG', 'TRIM75P', 'ARGFX', 'RP11-1217F2.22', 'AC078899.3', 'FAM151A', 'DPPA3', 'ZNF735', '…	ARCHS4 (coexpressed genes)	downregulated
SUZ12_18555785_ChIP-Seq_MESCs_Mouse	-2.13668	82.2451	2.00232e-15	1.91916e-17	['SEMA5A', 'MOXD1', 'CTNND2', 'GRIK3', 'IKZF1', 'JPH4', 'SOX3', 'CDH4', 'EDNRB', 'HTR7', 'ZIC2', 'EMILIN3', 'RSPO1', 'PCDHAC2', 'PKNOX2', 'ADAMTS7', 'DUSP4', 'FOXD3', 'CADPS2', 'GRID2', 'EDN1', 'SLC30A3', 'TRPC4', 'IGFBP3', 'FST', 'PAX3', 'GFRA1', 'DKK1', 'ADRA2A', 'POU3F4', 'TOX3', 'AR', 'COL2A1', 'KCNQ1', 'PKP1', 'CDC42EP1', 'ROR1', 'LRRC3B', 'DGKI', 'SLC22A3', 'ADCYAP1R1', 'COL13A1', 'KCNA1', …	ChEA (experimentally validated targets)	upregulated
ZNF280A_human_tf_ARCHS4_coexpression	-1.85663	70.9313	2.55541e-15	2.55882e-17	['KHDC3L', 'KHDC1L', 'AC073333.1', 'DPPA3P2', 'AC017081.1', 'TPTE', 'RP13-492C18.2', 'AC017081.3', 'AL135745.1', 'RP11-257K9.8', 'AC109486.1', 'ZNF728', 'ZNF723P', 'MKRN4P', 'C1DP2', 'TRIM60', 'TRIM61', 'ZNF705D', 'TRIM53AP', 'NAA11', 'AC008810.1', 'DNAJC15', 'ATP5F1P7', 'RP11-347H15.5', 'KLF17', 'FOXR1', 'THEG', 'TRIM75P', 'ARGFX', 'RP11-1217F2.22', 'AC078899.3', 'FAM151A', 'DPPA3', 'ZNF735', 'A…	ARCHS4 (coexpressed genes)	downregulated
RNF2_18974828_ChIP-Seq_MESCs_Mouse	-2.03303	75.5205	5.76572e-15	7.36833e-17	['SEMA5A', 'SEMA5B', 'FLT1', 'CTNND2', 'GRIK3', 'RAX', 'HAPLN4', 'SOX21', 'SOX3', 'TRIM9', 'CDH4', 'SIX6', 'ZIC2', 'DPYSL5', 'EMILIN3', 'NEFM', 'KIF1A', 'RSPO1', 'STK32A', 'PCDHAC2', 'PKNOX2', 'ADAMTS7', 'DUSP4', 'FOXD3', 'EDN1', 'SLC30A3', 'FST', 'PAX3', 'APOA1', 'SOX11', 'GFRA1', 'SEZ6L', 'SORCS3', 'ADRA2A', 'AR', 'SFRP2', 'CLDN3', 'COL2A1', 'NRG3', 'KCNQ1', 'PKP1', 'SCN4B', 'FREM2', 'HMX2', 'C…	ChEA (experimentally validated targets)	upregulated
EZH2_18974828_ChIP-Seq_MESCs_Mouse	-2.03873	75.7323	5.76572e-15	7.36833e-17	['SEMA5A', 'SEMA5B', 'FLT1', 'CTNND2', 'GRIK3', 'RAX', 'HAPLN4', 'SOX21', 'SOX3', 'TRIM9', 'CDH4', 'SIX6', 'ZIC2', 'DPYSL5', 'EMILIN3', 'NEFM', 'KIF1A', 'RSPO1', 'STK32A', 'PCDHAC2', 'PKNOX2', 'ADAMTS7', 'DUSP4', 'FOXD3', 'EDN1', 'SLC30A3', 'FST', 'PAX3', 'APOA1', 'SOX11', 'GFRA1', 'SEZ6L', 'SORCS3', 'ADRA2A', 'AR', 'SFRP2', 'CLDN3', 'COL2A1', 'NRG3', 'KCNQ1', 'PKP1', 'SCN4B', 'FREM2', 'HMX2', 'C…	ChEA (experimentally validated targets)	upregulated
JARID2_20064375_ChIP-Seq_MESCs_Mouse	-1.99593	73.1747	8.32243e-15	1.19652e-16	['BARHL1', 'SEMA5B', 'FLT1', 'CTNND2', 'RAX', 'IKZF1', 'HAPLN4', 'SOX21', 'SOX3', 'CDH4', 'CYP26B1', 'SIX6', 'HTR7', 'ZIC2', 'EMILIN3', 'RSPO1', 'PCDHAC2', 'PKNOX2', 'PLEKHG3', 'CADPS2', 'GRID2', 'ST6GAL2', 'SLC30A3', 'KCND2', 'FST', 'PAX3', 'GFRA1', 'SEZ6L', 'SORCS3', 'ADRA2A', 'AR', 'COL2A1', 'ASTL', 'NRG3', 'PKP1', 'VWA2', 'SCN4B', 'FREM2', 'DGKI', 'HMX2', 'NECAB2', 'ADCYAP1R1', 'KCNA1', 'TMEM…	ChEA (experimentally validated targets)	upregulated
ARGFX_human_tf_ARCHS4_coexpression	-1.84849	67.2304	1.49947e-14	1.60157e-16	['RTP3', 'KHDC3L', 'KHDC1L', 'AC073333.1', 'DPPA3P2', 'AC017081.1', 'TPTE', 'AC017081.3', 'AL135745.1', 'RP11-257K9.8', 'AC109486.1', 'ZNF728', 'ZNF723P', 'MKRN4P', 'C1DP2', 'TRIM60', 'TRIM61', 'ZNF705D', 'TRIM53AP', 'NAA11', 'AC008810.1', 'DNAJC15', 'ATP5F1P7', 'RP11-347H15.5', 'ALPPL2', 'KLF17', 'FOXR1', 'TRIM75P', 'RP11-1217F2.22', 'AC078899.3', 'FAM151A', 'DPPA3', 'ZNF735', 'AL136097.1', 'DPP…	ARCHS4 (coexpressed genes)	downregulated
JARID2_20075857_ChIP-Seq_MESCs_Mouse	-1.90318	65.8564	5.8684e-14	9.37444e-16	['FKBP10', 'SEMA5B', 'FLT1', 'RAX', 'PLAT', 'IKZF1', 'HAPLN4', 'SOX21', 'SOX3', 'TRIM9', 'CDH4', 'CYP26B1', 'SIX6', 'ZIC2', 'EMILIN3', 'NEFM', 'KIF1A', 'RSPO1', 'FEZF1', 'PCDHAC2', 'PKNOX2', 'PLEKHG3', 'DUSP4', 'FOXD3', 'GRID2', 'SLC30A3', 'FST', 'PAX3', 'SOX14', 'SOX11', 'GFRA1', 'SEZ6L', 'SORCS3', 'ADRA2A', 'SHISA6', 'ANO1', 'CLDN3', 'MYL7', 'COL2A1', 'NRG3', 'NOS1AP', 'FAM84A', 'PKP1', 'VWA2',…	ChEA (experimentally validated targets)	upregulated
NR2F1_human_tf_ARCHS4_coexpression	-1.63195	59.3547	7.5594e-14	1.60157e-16	['CRB2', 'NECAB2', 'NLGN3', 'FKBP10', 'SEMA5B', 'ADCYAP1R1', 'NTM', 'CTNND2', 'TSPAN11', 'SOX21', 'NKAIN1', 'TCEAL7', 'CDH4', 'IGFBPL1', 'SV2A', 'DPYSL5', 'WIF1', 'SLC22A17', 'IGLON5', 'DPYSL3', 'EMILIN3', 'KIF1A', 'CTNNA2', 'TP53I11', 'HES5', 'ADAMTS7', 'CADM3', 'C14ORF132', 'POU3F4', 'PTPRD', 'ADGRB2', 'SYT11', 'TMSB15A', 'FAM131B', 'FEZ1', 'COL4A6', 'PRR36', 'RNF165']	ARCHS4 (coexpressed genes)	upregulated
ZNF532_human_tf_ARCHS4_coexpression	-1.6018	58.258	7.5594e-14	1.60157e-16	['NLGN3', 'FBN3', 'CTTNBP2', 'GRIK5', 'CTNND2', 'GRIK3', 'ADCY2', 'ZDHHC22', 'GLI2', 'NKAIN1', 'SALL2', 'ZIC2', 'DPYSL5', 'PODXL', 'IGLON5', 'DPYSL3', 'KIF1A', 'CTNNA2', 'RHBDL3', 'CSMD2', 'VRTN', 'ADAMTS7', 'FZD7', 'B3GAT1', 'SOX11', 'C14ORF132', 'SYT6', 'PTPRD', 'NFASC', 'SFRP2', 'SYT11', 'FAM131B', 'FEZ1', 'FAT3', 'PHC1P1', 'PRR36', 'ASTN1', 'RNF165']	ARCHS4 (coexpressed genes)	upregulated
POU3F3_human_tf_ARCHS4_coexpression	-1.59235	57.9143	7.5594e-14	1.60157e-16	['CRB2', 'NLGN3', 'SEMA5B', 'CTNND2', 'SOGA3', 'TSPAN11', 'JAKMIP2', 'JPH4', 'TRIM9', 'CDH4', 'DPYSL5', 'SLC22A17', 'IGLON5', 'DPYSL3', 'CTNNA2', 'HES5', 'CACNG4', 'CCDC177', 'BTBD17', 'B3GAT1', 'SOX11', 'C14ORF132', 'SORCS3', 'GRIN2B', 'POU3F4', 'PTPRD', 'MAPK10', 'ADGRB2', 'SYT11', 'TMSB15A', 'FAM131B', 'FEZ1', 'SMOC1', 'FAT3', 'TNIK', 'PRR36', 'ASTN1', 'RNF165']	ARCHS4 (coexpressed genes)	upregulated
ZIM3_human_tf_ARCHS4_coexpression	-1.95863	67.706	8.55771e-14	9.71169e-16	['KHDC3L', 'KHDC1L', 'AC073333.1', 'DPPA3P2', 'AC017081.1', 'AC017081.3', 'AL135745.1', 'RP11-257K9.8', 'AC109486.1', 'ZNF728', 'ZNF723P', 'MKRN4P', 'C1DP2', 'TRIM60', 'TRIM61', 'ZNF705D', 'TRIM53AP', 'NAA11', 'AC008810.1', 'DNAJC15', 'ATP5F1P7', 'RP11-347H15.5', 'KLF17', 'FOXR1', 'THEG', 'TRIM75P', 'ARGFX', 'RP11-1217F2.22', 'AC078899.3', 'FAM151A', 'DPPA3', 'ZNF735', 'AL136097.1', 'DPPA5', 'ZNF…	ARCHS4 (coexpressed genes)	downregulated
SUZ12_27294783_Chip-Seq_ESCs_Mouse	-1.41333	46.184	3.66022e-13	6.4317e-15	['SEMA5A', 'SEMA5B', 'RAX', 'IKZF1', 'SOX21', 'NIPAL4', 'SOX3', 'EDNRB', 'SALL2', 'DPYSL5', 'FAM110C', 'PCDHAC2', 'PKNOX2', 'ST6GAL2', 'IGFBP3', 'FST', 'SOX14', 'SOX11', 'SHISA2', 'SHISA6', 'SFRP2', 'OPTC', 'PKP1', 'ERP27', 'CFTR', 'IDO1', 'TMEM59L', 'CRABP1', 'LYPD1', 'IL20RA', 'LIN7A', 'THY1', 'RHOBTB1', 'CALCR', 'HRH3', 'PODXL', 'RHBDL3', 'DRD4', 'EGR2', 'BTBD17', 'WSCD2', 'RASL10B', 'FZD7', '…	ChEA (experimentally validated targets)	upregulated
ZNF597_human_tf_ARCHS4_coexpression	-1.77654	58.267	4.27062e-13	5.70176e-15	['KHDC3L', 'KHDC1L', 'DCAF4L2', 'DDX43', 'DPPA3P2', 'AL135745.1', 'NLRP9', 'RP11-257K9.8', 'ZNF727', 'ZNF723P', 'NLRP4', 'RNF17', 'MKRN4P', 'HORMAD1', 'C1DP2', 'TRIM60', 'ZNF705D', 'TRIM53AP', 'NAA11', 'AC008810.1', 'DNAJC15', 'OOEP', 'KLF17', 'FOXR1', 'TRIM75P', 'ARGFX', 'RP11-1217F2.22', 'AC078899.3', 'FAM151A', 'DPPA3', 'ZNF735', 'DPPA5', 'ZNF534', 'HDGFL1', 'ZNF676', 'BRDT']	ARCHS4 (coexpressed genes)	downregulated
ZNF705D_human_tf_ARCHS4_coexpression	-1.84422	60.4867	4.27062e-13	5.70176e-15	['LUZP4', 'KHDC3L', 'KHDC1L', 'DDX43', 'DPPA3P2', 'TPTE', 'RP13-492C18.2', 'AL135745.1', 'CTD-2285G11.1', 'NLRP9', 'RP11-257K9.8', 'ZNF727', 'ZNF723P', 'HOXA1', 'MKRN4P', 'HORMAD1', 'C1DP2', 'TRIM60', 'TRIM53AP', 'NAA11', 'AC008810.1', 'DNAJC15', 'KLF17', 'FOXR1', 'TRIM75P', 'ARGFX', 'RP11-1217F2.22', 'RP11-126O22.1', 'AC078899.3', 'FAM151A', 'DPPA3', 'ZFP42', 'ZNF735', 'ZNF534', 'HDGFL1', 'BRDT']	ARCHS4 (coexpressed genes)	downregulated
ZNF479_human_tf_ARCHS4_coexpression	-1.91394	62.7735	4.27062e-13	5.70176e-15	['LUZP4', 'KHDC3L', 'SPESP1', 'PPP1R2P9', 'KHDC1L', 'DCAF4L2', 'DPPA3P2', 'AC017081.1', 'TPTE', 'AC017081.3', 'VN1R87P', 'RP11-257K9.8', 'ZNF723P', 'MAEL', 'RNF17', 'MKRN4P', 'C1DP2', 'TRIM60', 'TRIM53AP', 'NAA11', 'DNAJC15', 'HLA-F', 'KLF17', 'FOXR1', 'TRIM75P', 'RBMXL2', 'ARGFX', 'RP11-1217F2.22', 'RP11-126O22.1', 'AC078899.3', 'FAM151A', 'DPPA3', 'ZNF735', 'ZNF534', 'HDGFL1', 'BRDT']	ARCHS4 (coexpressed genes)	downregulated
RNF2_27304074_Chip-Seq_ESCs_Mouse	-1.68775	54.4421	5.10813e-13	9.79194e-15	['BARHL1', 'SEMA5A', 'FLT1', 'CTNND2', 'RAX', 'IKZF1', 'SOX21', 'GLI3', 'JPH4', 'CYP26B1', 'SIX6', 'ZIC2', 'DPYSL5', 'FAM110C', 'KIF1A', 'RSPO1', 'FEZF1', 'PCDHAC2', 'PKNOX2', 'ADAMTS7', 'CADPS2', 'GRID2', 'ST6GAL2', 'SLC30A3', 'IGFBP3', 'FST', 'PAX3', 'SOX14', 'SOX11', 'GFRA1', 'SHISA2', 'ADRA2A', 'SHISA6', 'SFRP2', 'MYL7', 'COL2A1', 'FAM84A', 'PKP1', 'VWA2', 'SCN4B', 'FREM2', 'HMX2', 'CRB2', 'N…	ChEA (experimentally validated targets)	upregulated
ZNF423_human_tf_ARCHS4_coexpression	-1.65584	54.3081	1.61474e-12	5.70176e-15	['CRB2', 'FBN3', 'GRIK5', 'CTNND2', 'TSPAN11', 'GLI2', 'JPH4', 'NKAIN1', 'CDH4', 'IGFBPL1', 'SALL2', 'ZIC2', 'DPYSL5', 'PODXL', 'IGLON5', 'DPYSL3', 'KIF1A', 'HES3', 'RHBDL3', 'CA14', 'VRTN', 'ADAMTS7', 'FZD7', 'ZBTB12', 'C14ORF132', 'ZIC5', 'PTPRD', 'SFRP2', 'TMSB15A', 'FAM131B', 'FEZ1', 'COL4A6', 'LRRN1', 'PRR36', 'ASTN1', 'RNF165']	ARCHS4 (coexpressed genes)	upregulated
SALL1_human_tf_ARCHS4_coexpression	-1.60843	52.7533	1.61474e-12	5.70176e-15	['NLGN3', 'FBN3', 'ADCYAP1R1', 'GRIK5', 'CTNND2', 'ZDHHC22', 'SOX21', 'GLI2', 'PTPRZ1', 'RASSF10', 'SALL2', 'ZIC2', 'PODXL', 'IGLON5', 'DPYSL3', 'HES3', 'RHBDL3', 'CA14', 'VRTN', 'PCYT1B', 'FZD7', 'B3GAT1', 'SPRY4', 'ETV1', 'ZBTB12', 'ZIC5', 'SYT6', 'PTPRD', 'TOX3', 'SFRP2', 'ADGRB2', 'LRRN1', 'FAT3', 'MFGE8', 'FREM2', 'PHC1P1']	ARCHS4 (coexpressed genes)	upregulated
LEUTX_human_tf_ARCHS4_coexpression	-1.72704	53.6437	2.31039e-12	3.23887e-14	['KHDC3L', 'SPESP1', 'KHDC1L', 'RPL10L', 'DPPA3P2', 'TPTE', 'RP11-257K9.8', 'ZNF728', 'ZNF723P', 'MKRN4P', 'C1DP2', 'TRIM60', 'TRIM61', 'ZNF705D', 'TRIM53AP', 'NAA11', 'DNAJC15', 'ATP5F1P7', 'RP11-347H15.5', 'ALPPL2', 'OOEP', 'KLF17', 'FOXR1', 'THEG', 'TRIM75P', 'ARGFX', 'RP11-1217F2.22', 'AC078899.3', 'FAM151A', 'DPPA3', 'ZNF735', 'DPPA5', 'ZNF534', 'HDGFL1', 'BRDT']	ARCHS4 (coexpressed genes)	downregulated
NPAS3_human_tf_ARCHS4_coexpression	-1.5717	48.8184	6.55177e-12	3.23887e-14	['CRB2', 'NLGN3', 'SEMA5B', 'ADCYAP1R1', 'NTM', 'CTNND2', 'LYPD1', 'JAKMIP2', 'TRIM9', 'CDH4', 'EDNRB', 'PTPRZ1', 'DPYSL5', 'DPYSL3', 'CTNNA2', 'FGFBP3', 'CACNG4', 'CADM3', 'B3GAT1', 'C14ORF132', 'SEZ6L', 'POU3F4', 'PTPRD', 'MAPK10', 'TOX3', 'NRG3', 'SYT11', 'FEZ1', 'SMOC1', 'CNTN1', 'LRRN1', 'FAT3', 'TNIK', 'ASTN1', 'RNF165']	ARCHS4 (coexpressed genes)	upregulated
SOX1_human_tf_ARCHS4_coexpression	-1.56274	48.5403	6.55177e-12	3.23887e-14	['CRB2', 'NLGN3', 'SEMA5B', 'CTNND2', 'TSPAN11', 'SOX21', 'GLI3', 'GLI2', 'JAKMIP2', 'CDH4', 'SALL2', 'DPYSL5', 'IGLON5', 'DPYSL3', 'RSPO1', 'FGFBP3', 'RNF175', 'HES5', 'CACNG4', 'ADAMTS7', 'BTBD17', 'SOX11', 'C14ORF132', 'POU3F4', 'PTPRD', 'MAPK10', 'COL2A1', 'SYT11', 'TMSB15A', 'FEZ1', 'SMOC1', 'COL4A6', 'LRRN1', 'PRR36', 'RNF165']	ARCHS4 (coexpressed genes)	upregulated
KLF11_human_tf_ARCHS4_coexpression	-1.662	48.7925	1.21123e-11	1.77884e-13	['LUZP4', 'KHDC3L', 'SPESP1', 'DCAF4L2', 'DDX43', 'DPPA3P2', 'TPTE', 'PSMA8', 'VN1R87P', 'NLRP9', 'SPATA22', 'NLRP4', 'MAEL', 'RNF17', 'HORMAD1', 'AK4P3', 'TRIM60', 'TKTL1', 'ZNF560', 'NAA11', 'ANKRD26P1', 'KLF4', 'RP11-347H15.5', 'OOEP', 'FOXR1', 'RP11-1217F2.22', 'DPPA3', 'TBPL2', 'MAGEB2', 'AL590762.7', 'DPPA5', 'HDGFL1', 'ZNF676', 'BRDT']	ARCHS4 (coexpressed genes)	downregulated
ZIC4_human_tf_ARCHS4_coexpression	-1.66043	48.7462	2.28985e-11	1.77884e-13	['CRB2', 'NLGN3', 'WFIKKN1', 'CTNND2', 'TMEM59L', 'JPH4', 'IGSF21', 'SV2A', 'DPYSL5', 'SLC22A17', 'KIF1A', 'RSPO1', 'RNF175', 'FEZF1', 'VAT1L', 'OPCML', 'CADM3', 'BTBD17', 'IQSEC3', 'B3GAT1', 'ETV1', 'C14ORF132', 'ZIC5', 'SYT9', 'NELL2', 'SYT11', 'TMSB15A', 'FAM131B', 'FEZ1', 'REEP2', 'COL4A6', 'PRR36', 'ASTN1', 'RNF165']	ARCHS4 (coexpressed genes)	upregulated
POU3F2_human_tf_ARCHS4_coexpression	-1.60777	47.2003	2.28985e-11	1.77884e-13	['NLGN3', 'SEMA5B', 'NTM', 'CTNND2', 'TSPAN11', 'SOX21', 'NKAIN1', 'TCEAL7', 'CDH4', 'IGFBPL1', 'PTPRZ1', 'DPYSL5', 'DPYSL3', 'CTNNA2', 'RHBDL3', 'ST6GAL2', 'B3GAT1', 'SOX11', 'C14ORF132', 'ADRA2A', 'POU3F4', 'PTPRD', 'MAPK10', 'NELL2', 'TOX3', 'NFASC', 'SYT11', 'TMSB15A', 'FAM131B', 'FEZ1', 'RNF182', 'LRRN1', 'FAT3', 'RNF165']	ARCHS4 (coexpressed genes)	upregulated
ETV1_human_tf_ARCHS4_coexpression	-1.56516	45.9493	2.28985e-11	1.77884e-13	['NLGN3', 'ADCYAP1R1', 'COLGALT2', 'KCNA1', 'CTNND2', 'TMEM59L', 'ATP1A2', 'ZDHHC22', 'JPH4', 'TRIM9', 'PTPRZ1', 'SV2A', 'SLC22A17', 'CLVS2', 'SPOCK1', 'KIF1A', 'CADPS2', 'CADM3', 'KCND2', 'IQSEC3', 'B3GAT1', 'C14ORF132', 'KLHL4', 'SEZ6L', 'ETV5', 'MAPK10', 'TOX3', 'NFASC', 'SYT11', 'FAM131B', 'FEZ1', 'SMOC1', 'CNTN1', 'ASTN1']	ARCHS4 (coexpressed genes)	upregulated
SALL2_human_tf_ARCHS4_coexpression	-1.64139	48.1873	2.28985e-11	1.77884e-13	['CRB2', 'FBN3', 'GRIK5', 'PLA2G3', 'KLHDC7A', 'ZDHHC22', 'GLI2', 'NKAIN1', 'HTR7', 'ZIC2', 'PODXL', 'ADAMTS19', 'IGLON5', 'DPYSL3', 'HES3', 'RHBDL3', 'CA14', 'VRTN', 'ADAMTS7', 'FOXD3', 'GRID2', 'PCYT1B', 'FZD7', 'ZBTB12', 'ZIC5', 'SYT6', 'SFRP2', 'TMSB15A', 'COL4A6', 'ROR1', 'LRRN1', 'MFGE8', 'PHC1P1', 'PRR36']	ARCHS4 (coexpressed genes)	upregulated
SUZ12_16625203_ChIP-ChIP_MESCs_Mouse	-2.50801	69.3036	4.80619e-11	9.98091e-13	['BARHL1', 'MOXD1', 'SEMA5B', 'FLT1', 'RAX', 'HAPLN4', 'SOX21', 'CXCL5', 'CX3CL1', 'TRIM9', 'CDH4', 'SIX6', 'HTR7', 'ZIC2', 'DPYSL5', 'EMILIN3', 'KIF1A', 'RSPO1', 'PLEKHG3', 'CADPS2', 'EDN1', 'ST6GAL2', 'SLC30A3', 'KCND2', 'TRPC4', 'FST', 'PAX3', 'GFRA1', 'SEZ6L', 'DKK1', 'POU3F4', 'AR', 'SFRP2', 'COL2A1', 'CCKBR', 'SLCO2A1', 'PKP1', 'ROR1', 'VWA2', 'HMX2', 'SLC22A3', 'ADCYAP1R1', 'RAMP2', 'NXPH2…	ChEA (experimentally validated targets)	upregulated
EZH2_27294783_Chip-Seq_ESCs_Mouse	-1.45144	39.4582	6.981e-11	1.56125e-12	['SEMA5A', 'SEMA5B', 'RAX', 'UBE2L6', 'IKZF1', 'SOX21', 'NIPAL4', 'SOX3', 'EDNRB', 'HTR7', 'SALL2', 'IGLON5', 'FAM110C', 'PKNOX2', 'IGFBP3', 'FST', 'SOX14', 'SOX11', 'PDYN', 'TM4SF1', 'SHISA6', 'AR', 'SFRP2', 'TNIK', 'SLC22A3', 'COL13A1', 'TMEM59L', 'LYPD1', 'PDGFB', 'LIN7A', 'RHOBTB1', 'CALCR', 'SLAMF8', 'RHBDL3', 'DRD4', 'CADM3', 'EGR2', 'BTBD17', 'NEBL', 'RASL10B', 'FZD7', 'HTR1D', 'ST8SIA3', …	ChEA (experimentally validated targets)	upregulated
ZNF296_human_tf_ARCHS4_coexpression	-1.66914	43.4897	3.1489e-10	4.83476e-12	['KHDC3L', 'KHDC1L', 'DPPA3P2', 'AL135745.1', 'DHFRP1', 'RP11-257K9.8', 'ZNF723P', 'BTLA', 'MKRN4P', 'C1DP2', 'CD53', 'TRIM60', 'CD70', 'TRIM53AP', 'NAA11', 'AC008810.1', 'DNAJC15', 'ALPPL2', 'KLF17', 'TRIM75P', 'ARGFX', 'RP11-1217F2.22', 'FAM151A', 'DPPA3', 'BTK', 'ZNF735', 'TNFSF9', 'HCLS1', 'DPPA5', 'ZNF534', 'BRDT', 'MYO1G']	ARCHS4 (coexpressed genes)	downregulated
SOX17_human_tf_ARCHS4_coexpression	-1.64876	42.9587	5.26617e-10	4.83476e-12	['FBN3', 'RAMP2', 'FLT1', 'MAGEB17', 'PDGFB', 'GRPR', 'HAPLN1', 'CALCR', 'RASSF10', 'PODXL', 'CYYR1', 'TP53I11', 'CER1', 'VRTN', 'EDN1', 'FZD7', 'FST', 'SPRY4', 'P3H2', 'FAM189A1', 'HSPG2', 'GNG11', 'DAZL', 'CYP26A1', 'CCKBR', 'SLCO2A1', 'ADGRF5', 'COL4A6', 'ALPK3', 'RAB17', 'ADGRL4', 'EPHA2']	ARCHS4 (coexpressed genes)	upregulated
OLIG1_human_tf_ARCHS4_coexpression	-1.5125	39.4084	5.26617e-10	4.83476e-12	['NLGN3', 'ADCYAP1R1', 'COLGALT2', 'VIPR2', 'CTNND2', 'TMEM59L', 'GRIK3', 'ATP1A2', 'ZDHHC22', 'ADCY8', 'JPH4', 'TRIM9', 'SLC22A17', 'KIF1A', 'RHBDL3', 'CACNG4', 'CA11', 'LYNX1', 'KCND2', 'CMTM5', 'B3GAT1', 'GDF1', 'ETV1', 'C14ORF132', 'SEZ6L', 'ADGRB2', 'SYT11', 'FAM131B', 'FEZ1', 'SMOC1', 'CNTN1', 'ASTN1']	ARCHS4 (coexpressed genes)	upregulated
RHOXF2B_human_tf_ARCHS4_coexpression	-2.01874	49.3736	1.49092e-09	2.38866e-11	['GCM1', 'MOGAT3', 'KHDC3L', 'KHDC1L', 'AC073333.1', 'DPPA3P2', 'AL135745.1', 'DSCR4', 'AC016739.2', 'RP11-257K9.8', 'CNR2', 'ZNF723P', 'LIPH', 'MKRN4P', 'DSCR8', 'RP11-692N5.2', 'TRIM60', 'NAA11', 'AC008810.1', 'DNAJC15', 'KLF17', 'FOXR1', 'TRIM75P', 'ARGFX', 'FAM151A', 'DPPA3', 'ZNF735', 'SYCP3', 'ZNF534', 'GTSF1', 'BRDT']	ARCHS4 (coexpressed genes)	downregulated
ZIC1_human_tf_ARCHS4_coexpression	-1.57942	38.629	2.11397e-09	2.38866e-11	['CRB2', 'GRIK5', 'CTNND2', 'TMEM59L', 'ATP1A2', 'TSPAN11', 'JPH4', 'CDH4', 'SV2A', 'DPYSL5', 'SLC22A17', 'IGLON5', 'DPYSL3', 'CLVS2', 'KIF1A', 'CTNNA2', 'OPCML', 'CA11', 'CADM3', 'IQSEC3', 'B3GAT1', 'C14ORF132', 'PTPRD', 'ADGRB2', 'SYT11', 'FAM131B', 'FEZ1', 'REEP2', 'TNIK', 'PRR36', 'RNF165']	ARCHS4 (coexpressed genes)	upregulated
MYT1_human_tf_ARCHS4_coexpression	-1.70095	41.6014	2.11397e-09	2.38866e-11	['SEMA5B', 'BEX1', 'FAM57B', 'GRIK5', 'CTNND2', 'JAKMIP2', 'JPH4', 'NKAIN1', 'IGFBPL1', 'SV2A', 'DPYSL5', 'SLC22A17', 'IGLON5', 'DPYSL3', 'KIF1A', 'CTNNA2', 'RHBDL3', 'B3GAT1', 'SOX11', 'C14ORF132', 'PTPRD', 'NFASC', 'SYT11', 'FAM131B', 'FEZ1', 'REEP2', 'CNTN2', 'LHX5', 'PRR36', 'ASTN1', 'RNF165']	ARCHS4 (coexpressed genes)	upregulated
TUB_human_tf_ARCHS4_coexpression	-1.54285	37.7345	2.11397e-09	2.38866e-11	['ADCYAP1R1', 'CTTNBP2', 'NTM', 'CTNND2', 'TMEM59L', 'ZDHHC22', 'JPH4', 'TRIM9', 'SV2A', 'DPYSL5', 'SLC22A17', 'DPYSL3', 'CLVS2', 'KIF1A', 'CTNNA2', 'OPCML', 'CADM3', 'B3GAT1', 'VSTM2L', 'C14ORF132', 'SEZ6L', 'PTPRD', 'MAPK10', 'NFASC', 'ADGRB2', 'SYT11', 'FAM131B', 'FEZ1', 'REEP2', 'CNTN1', 'ASTN1']	ARCHS4 (coexpressed genes)	upregulated
GATA6_human_tf_ARCHS4_coexpression	-1.60514	36.7533	6.55245e-09	1.13727e-10	['KHDC3L', 'KHDC1L', 'DPPA3P2', 'GBA3', 'RP11-257K9.8', 'ZNF723P', 'HNF4A', 'RP11-415I12.2', 'TBX20', 'MKRN4P', 'RP11-366M4.11', 'C1DP2', 'TRIM60', 'SLC6A19', 'CDX1', 'AGL', 'TRIM53AP', 'NAA11', 'DNAJC15', 'PRAP1', 'KLF17', 'FOXR1', 'TRIM75P', 'ARGFX', 'RP11-1217F2.22', 'FAM151A', 'DPPA3', 'ZNF735', 'ZNF534', 'BRDT']	ARCHS4 (coexpressed genes)	downregulated
HOXD1_human_tf_ARCHS4_coexpression	-1.64256	37.61	6.55245e-09	1.13727e-10	['ST6GALNAC1', 'KHDC3L', 'SPESP1', 'RP11-241F15.1', 'DDX43', 'DPPA3P2', 'HOXC11', 'HOXC10', 'RP11-257K9.8', 'SPATA22', 'ZNF723P', 'MKRN4P', 'C1DP2', 'TRIM60', 'TRIM53AP', 'ANKRD26P1', 'CTAG2', 'RP11-807H22.6', 'KLF17', 'FOXR1', 'TRIM75P', 'ARGFX', 'RP11-1217F2.22', 'FAM151A', 'DPPA3', 'ZNF735', 'HOXD3', 'HOXD9', 'HOXD8', 'BRDT']	ARCHS4 (coexpressed genes)	downregulated
OLIG2_human_tf_ARCHS4_coexpression	-1.53727	35.1991	8.47569e-09	1.13727e-10	['NLGN3', 'ADCYAP1R1', 'COLGALT2', 'VIPR2', 'CTNND2', 'TMEM59L', 'GRIK3', 'ATP1A2', 'ZDHHC22', 'ADCY8', 'JPH4', 'TRIM9', 'PTPRZ1', 'SLC22A17', 'KIF1A', 'RHBDL3', 'CACNG4', 'KCND2', 'B3GAT1', 'GDF1', 'ETV1', 'C14ORF132', 'SEZ6L', 'ADGRB2', 'SYT11', 'FAM131B', 'FEZ1', 'SMOC1', 'CNTN1', 'ASTN1']	ARCHS4 (coexpressed genes)	upregulated
HEY1_human_tf_ARCHS4_coexpression	-1.53891	35.2367	8.47569e-09	1.13727e-10	['NLGN3', 'SEMA5B', 'ADCYAP1R1', 'COLGALT2', 'FLT1', 'NTM', 'CTNND2', 'LYPD1', 'ATP1A2', 'ZDHHC22', 'ADCY8', 'TRIM9', 'EDNRB', 'PTPRZ1', 'RHBDL3', 'FGFBP3', 'CACNG4', 'RP6-24A23.6', 'B3GAT1', 'C14ORF132', 'SEZ6L', 'ADGRB2', 'SYT11', 'FEZ1', 'SMOC1', 'ID3', 'LRRN1', 'TNIK', 'ADGRL4', 'ASTN1']	ARCHS4 (coexpressed genes)	upregulated
PLXNA4_human_tf_ARCHS4_coexpression	-1.50123	34.3741	8.47569e-09	1.13727e-10	['CTTNBP2', 'CTNND2', 'PLPPR5', 'SOGA3', 'CHRDL1', 'ADCY5', 'JPH4', 'CDH4', 'SV2A', 'DPYSL5', 'DPYSL3', 'CLVS2', 'KIF1A', 'CTNNA2', 'CSMD2', 'OPCML', 'PKNOX2', 'B3GAT1', 'SORCS3', 'ADRA2A', 'PTPRD', 'LRFN2', 'NFASC', 'ADGRB2', 'SYT11', 'FAM131B', 'CNTN1', 'FAT3', 'DGKI', 'ASTN1']	ARCHS4 (coexpressed genes)	upregulated
EED_16625203_ChIP-ChIP_MESCs_Mouse	-2.63086	56.9378	1.66484e-08	3.98922e-10	['BARHL1', 'SEMA5B', 'FLT1', 'RAX', 'HAPLN4', 'SOX21', 'CXCL5', 'SOX3', 'CDH4', 'SIX6', 'HTR7', 'EMILIN3', 'KIF1A', 'RSPO1', 'PTGIS', 'SLC30A3', 'KCND2', 'PAX3', 'GFRA1', 'SEZ6L', 'DKK1', 'POU3F4', 'AR', 'CLDN3', 'COL2A1', 'CCKBR', 'SLCO2A1', 'PKP1', 'VWA2', 'ADCYAP1R1', 'RAMP2', 'KCNA1', 'NTM', 'CRABP1', 'ADCY8', 'PTHLH', 'GNA14', 'HRH3', 'FRZB', 'PODXL', 'SLITRK3', 'HES5', 'CACNG4', 'NEBL', 'ST…	ChEA (experimentally validated targets)	upregulated
MAEL_human_tf_ARCHS4_coexpression	-1.74656	37.3321	2.78899e-08	5.21307e-10	['LUZP4', 'KHDC3L', 'SPESP1', 'PPP1R2P9', 'DCAF4L2', 'DDX43', 'DPPA3P2', 'TPTE', 'SYCE1', 'VN1R87P', 'NLRP9', 'SPATA22', 'ZNF723P', 'NLRP4', 'RNF17', 'HORMAD1', 'NAA11', 'ANKRD26P1', 'DDX53', 'RP11-347H15.5', 'COX7B2', 'OOEP', 'FOXR1', 'RP11-1217F2.22', 'DPPA3', 'AL590762.7', 'SYCP3', 'HDGFL1', 'BRDT']	ARCHS4 (coexpressed genes)	downregulated
MATR3_human_tf_ARCHS4_coexpression	-1.70251	36.3906	2.78899e-08	5.21307e-10	['LUZP4', 'KHDC3L', 'SPESP1', 'DCAF4L2', 'RP11-241F15.1', 'DDX43', 'CSNK1A1P1', 'TPTE', 'REM1', 'SYCE1', 'VN1R87P', 'SPATA22', 'ZNF723P', 'MAEL', 'RNF17', 'HORMAD1', 'RP11-366M4.11', 'FGF23', 'BP-21264C1.1', 'ZNF705D', 'LVRN', 'RBMXL2', 'RP11-1217F2.22', 'RP11-126O22.1', 'TBPL2', 'FRG1FP', 'AL590762.7', 'MAGEB1', 'HDGFL1']	ARCHS4 (coexpressed genes)	downregulated
CUX2_human_tf_ARCHS4_coexpression	-1.50966	32.2685	3.20944e-08	5.21307e-10	['CTTNBP2', 'GRIK5', 'CTNND2', 'TMEM59L', 'PLPPR5', 'JPH4', 'CDH4', 'SV2A', 'DPYSL5', 'SLC22A17', 'DPYSL3', 'CLVS2', 'KIF1A', 'CTNNA2', 'CA11', 'CADM3', 'PIANP', 'B3GAT1', 'MAT1A', 'GRIN2B', 'ADRA2A', 'PTPRD', 'NFASC', 'ADGRB2', 'SYT11', 'FAM131B', 'FAT3', 'PRR36', 'ASTN1']	ARCHS4 (coexpressed genes)	upregulated
ID4_human_tf_ARCHS4_coexpression	-1.55239	33.1818	3.20944e-08	5.21307e-10	['NLGN3', 'SEMA5B', 'ADCYAP1R1', 'CASC10', 'NTM', 'CTNND2', 'LYPD1', 'ADCY8', 'SOX21', 'TRIM9', 'EDNRB', 'RASSF10', 'DPYSL3', 'FGFBP3', 'HES5', 'FAM189A2', 'C14ORF132', 'SEZ6L', 'POU3F4', 'PTPRD', 'TOX3', 'SYT11', 'LIX1', 'FEZ1', 'SMOC1', 'COL4A6', 'LRRN1', 'FAT3', 'DGKI']	ARCHS4 (coexpressed genes)	upregulated
MEIS3_human_tf_ARCHS4_coexpression	-1.62023	34.6318	3.20944e-08	5.21307e-10	['GRIK5', 'CTNND2', 'TMEM59L', 'JPH4', 'CDH4', 'HRH3', 'SV2A', 'DPYSL5', 'SLC22A17', 'IGLON5', 'DPYSL3', 'KIF1A', 'CTNNA2', 'CACNG4', 'ADAMTS7', 'CA11', 'CADM3', 'PTGIS', 'PIANP', 'B3GAT1', 'C14ORF132', 'NFASC', 'ADGRB2', 'SYT11', 'FAM131B', 'FEZ1', 'REEP2', 'PRR36', 'ASTN1']	ARCHS4 (coexpressed genes)	upregulated
ZSCAN18_human_tf_ARCHS4_coexpression	-1.63234	34.8909	3.20944e-08	5.21307e-10	['GRIK5', 'CTNND2', 'TMEM59L', 'JPH4', 'IGSF21', 'SV2A', 'DPYSL5', 'SLC22A17', 'DPYSL3', 'KIF1A', 'CTNNA2', 'HES5', 'CA11', 'CADM3', 'IQSEC3', 'B3GAT1', 'VSTM2L', 'GDF1', 'NFASC', 'ADGRB2', 'SYT11', 'FAM131B', 'FEZ1', 'REEP2', 'CNTN2', 'PTPN5', 'PRR36', 'ASTN1', 'RNF165']	ARCHS4 (coexpressed genes)	upregulated
RNF2_16625203_ChIP-ChIP_MESCs_Mouse	-2.44469	50.7014	3.84973e-08	9.83956e-10	['BARHL1', 'MOXD1', 'SEMA5B', 'FLT1', 'RAX', 'HAPLN4', 'SOX21', 'SOX3', 'CDH4', 'SIX6', 'EDNRB', 'ZIC2', 'DPYSL5', 'EMILIN3', 'RSPO1', 'PLEKHG3', 'DUSP4', 'CADPS2', 'EDN1', 'ST6GAL2', 'SLC30A3', 'KCND2', 'TRPC4', 'FST', 'PAX3', 'SOX11', 'GFRA1', 'PDYN', 'SEZ6L', 'DKK1', 'DUSP6', 'POU3F4', 'AR', 'SFRP2', 'KEL', 'COL2A1', 'SLCO2A1', 'PKP1', 'VWA2', 'ADCYAP1R1', 'KCNA1', 'CRABP1', 'ADCY2', 'TULP1', …	ChEA (experimentally validated targets)	upregulated
DMRTB1_human_tf_ARCHS4_coexpression	-1.7237	34.2863	1.11058e-07	2.29827e-09	['KHDC3L', 'KHDC1L', 'DDX43', 'DPPA3P2', 'TPTE', 'NLRP9', 'RP11-257K9.8', 'SPATA22', 'ZNF723P', 'NLRP4', 'MAEL', 'NLRP2', 'RNF17', 'C1DP2', 'TRIM60', 'NAA11', 'OOEP', 'KLF17', 'FOXR1', 'TRIM75P', 'ARGFX', 'FAM151A', 'DPPA3', 'ZNF735', 'DPPA5', 'ZNF534', 'HDGFL1', 'BRDT']	ARCHS4 (coexpressed genes)	downregulated
ZNF560_human_tf_ARCHS4_coexpression	-1.74313	34.6729	1.11058e-07	2.29827e-09	['KHDC3L', 'KHDC1L', 'DCAF4L2', 'DDX43', 'DPPA3P2', 'VN1R87P', 'NLRP9', 'ZNF723P', 'NLRP4', 'ZNF208', 'MAEL', 'NLRP2', 'TRIM60', 'NAA11', 'DNAJC15', 'COX7B2', 'OOEP', 'KLF17', 'FOXR1', 'TRIM75P', 'RP11-1217F2.22', 'DPPA3', 'ZFP42', 'AL590762.7', 'DPPA5', 'HDGFL1', 'ZNF676', 'BRDT']	ARCHS4 (coexpressed genes)	downregulated
ZNF394_human_tf_ARCHS4_coexpression	-1.70711	33.9563	1.11058e-07	2.29827e-09	['KHDC3L', 'KHDC1L', 'DPPA3P2', 'RP11-257K9.8', 'ZNF723P', 'MKRN4P', 'C1DP2', 'CD53', 'TRIM60', 'TRIM53AP', 'NAA11', 'ATP5F1P7', 'RP11-347H15.5', 'KLF17', 'FOXR1', 'TRIM75P', 'ARGFX', 'RP11-1217F2.22', 'FAM151A', 'DPPA3', 'TBPL2', 'ZNF735', 'HCLS1', 'AL136097.1', 'LCP1', 'ZNF534', 'BRDT', 'MYO1G']	ARCHS4 (coexpressed genes)	downregulated
SOX8_human_tf_ARCHS4_coexpression	-1.53163	30.4659	1.25167e-07	2.29827e-09	['NLGN3', 'ADCYAP1R1', 'COLGALT2', 'VIPR2', 'CTNND2', 'TMEM59L', 'GRIK3', 'ATP1A2', 'ZDHHC22', 'ADCY8', 'JPH4', 'TRIM9', 'SLC22A17', 'KIF1A', 'RHBDL3', 'CACNG4', 'CMTM5', 'B3GAT1', 'GDF1', 'ETV1', 'C14ORF132', 'SEZ6L', 'ADGRB2', 'SYT11', 'FAM131B', 'FEZ1', 'SMOC1', 'ASTN1']	ARCHS4 (coexpressed genes)	upregulated
ZSCAN10_human_tf_ARCHS4_coexpression	-1.6036	31.8974	1.25167e-07	2.29827e-09	['FBN3', 'GRIK5', 'PLA2G3', 'KLHDC7A', 'ZDHHC22', 'GLI2', 'HTR7', 'SALL2', 'PODXL', 'ADAMTS19', 'IGLON5', 'HES3', 'VRTN', 'ADAMTS7', 'FOXD3', 'GRID2', 'FZD7', 'SPRY4', 'ZBTB12', 'ZIC5', 'SYT6', 'SFRP2', 'ROR1', 'LRRN1', 'RAB17', 'SMPDL3B', 'MFGE8', 'PHC1P1']	ARCHS4 (coexpressed genes)	upregulated
GBX2_human_tf_ARCHS4_coexpression	-1.49255	29.6884	1.25167e-07	2.29827e-09	['BARHL1', 'CRB2', 'SEMA5B', 'CTNND2', 'CRABP1', 'TSPAN11', 'SOX21', 'GLI2', 'CDH4', 'ZNF80', 'C1ORF226', 'IGFBPL1', 'EDNRB', 'DPYSL5', 'DPYSL3', 'RHBDL3', 'FGFBP3', 'ADAMTS7', 'BTBD17', 'SPRY4', 'POU3F4', 'PTPRD', 'SYT11', 'NOS1AP', 'REEP2', 'CNTN2', 'ID3', 'LRRN1']	ARCHS4 (coexpressed genes)	upregulated
SCRT1_human_tf_ARCHS4_coexpression	-1.55722	28.7269	4.0542e-07	9.73467e-09	['GRIK5', 'CTNND2', 'TMEM59L', 'JPH4', 'NKAIN1', 'IGSF21', 'HRH3', 'SV2A', 'SLC22A17', 'DPYSL3', 'NEFM', 'KIF1A', 'CA11', 'CADM3', 'LYNX1', 'IQSEC3', 'B3GAT1', 'GDF1', 'NFASC', 'ADGRB2', 'FAM131C', 'SYT11', 'FAM131B', 'REEP2', 'CNTN2', 'LHX5', 'PRR36']	ARCHS4 (coexpressed genes)	upregulated
CSDC2_human_tf_ARCHS4_coexpression	-1.60327	29.5765	4.0542e-07	9.73467e-09	['NLGN3', 'CTNND2', 'TMEM59L', 'ATP1A2', 'ADCY5', 'JPH4', 'SV2A', 'DPYSL5', 'SLC22A17', 'CLVS2', 'SPOCK1', 'KIF1A', 'CTNNA2', 'CA11', 'CADM3', 'LYNX1', 'IQSEC3', 'B3GAT1', 'GDF1', 'C14ORF132', 'ADGRB2', 'SYT11', 'FAM131B', 'FEZ1', 'REEP2', 'SCN4B', 'ASTN1']	ARCHS4 (coexpressed genes)	upregulated
SP8_human_tf_ARCHS4_coexpression	-1.58774	29.29	4.0542e-07	9.73467e-09	['CRB2', 'FBN3', 'WFIKKN1', 'SOX21', 'GLI3', 'SOX3', 'SALL2', 'ZIC2', 'DPYSL5', 'RSPO1', 'FEZF1', 'HES5', 'CA14', 'BTBD17', 'ETV1', 'SOX11', 'ZIC5', 'PGA5', 'TOX3', 'SFRP2', 'COL2A1', 'TMSB15A', 'NOVA2', 'COL4A6', 'LHX5', 'LRRN1', 'RNF165']	ARCHS4 (coexpressed genes)	upregulated
ZIC3_human_tf_ARCHS4_coexpression	-1.57094	28.9801	4.0542e-07	9.73467e-09	['FBN3', 'MAGEB17', 'GRPR', 'HAPLN1', 'GLI2', 'SALL2', 'ZIC2', 'PODXL', 'ADAMTS19', 'IGLON5', 'DPYSL3', 'HES3', 'FEZF1', 'CER1', 'CA14', 'VRTN', 'P3H2', 'ZIC5', 'SYT6', 'CYP26A1', 'SFRP2', 'CCKBR', 'TMSB15A', 'COL4A6', 'ROR1', 'LRRN1', 'PHC1P1']	ARCHS4 (coexpressed genes)	upregulated
RCOR2_human_tf_ARCHS4_coexpression	-1.56327	28.8385	4.0542e-07	9.73467e-09	['CRB2', 'FBN3', 'GRIK5', 'ZDHHC22', 'TSPAN11', 'GLI2', 'NKAIN1', 'IGFBPL1', 'SALL2', 'DPYSL5', 'PODXL', 'IGLON5', 'DPYSL3', 'HES3', 'RHBDL3', 'VRTN', 'ADAMTS7', 'FZD7', 'ZBTB12', 'ZIC5', 'SFRP2', 'COL2A1', 'FAM131B', 'LRRN1', 'MFGE8', 'PHC1P1', 'PRR36']	ARCHS4 (coexpressed genes)	upregulated
CAMTA1_human_tf_ARCHS4_coexpression	-1.55245	28.6388	4.0542e-07	9.73467e-09	['BEX1', 'KCNA1', 'NTM', 'CTNND2', 'TMEM59L', 'JPH4', 'SV2A', 'SLC22A17', 'TCEAL2', 'CLVS2', 'KIF1A', 'CTNNA2', 'OPCML', 'CA11', 'CADM3', 'PIANP', 'B3GAT1', 'ST8SIA3', 'PTPRD', 'MAPK10', 'NFASC', 'SYT11', 'TMSB15A', 'FAM131B', 'FEZ1', 'NOS1AP', 'ASTN1']	ARCHS4 (coexpressed genes)	upregulated
MYT1L_human_tf_ARCHS4_coexpression	-1.53402	28.299	4.0542e-07	9.73467e-09	['CTTNBP2', 'KCNA1', 'NTM', 'CTNND2', 'TMEM59L', 'JAKMIP2', 'JPH4', 'SV2A', 'SLC22A17', 'TCEAL2', 'CLVS2', 'KIF1A', 'CTNNA2', 'OPCML', 'B3GAT1', 'ST8SIA3', 'SOX11', 'GRIN2B', 'PTPRD', 'MAPK10', 'NFASC', 'SYT11', 'FAM131B', 'CNTN1', 'FAT3', 'PTPN5', 'ASTN1']	ARCHS4 (coexpressed genes)	upregulated
POU6F1_human_tf_ARCHS4_coexpression	-1.49109	27.507	4.0542e-07	9.73467e-09	['KCNA1', 'CTNND2', 'TMEM59L', 'ATP1A2', 'JPH4', 'TRIM9', 'SV2A', 'SLC22A17', 'CLVS2', 'KIF1A', 'CTNNA2', 'OPCML', 'CA11', 'CADM3', 'LYNX1', 'IQSEC3', 'B3GAT1', 'PNMA3', 'NFASC', 'ADGRB2', 'SYT11', 'FAM131B', 'FEZ1', 'REEP2', 'CNTN1', 'PTPN5', 'ASTN1']	ARCHS4 (coexpressed genes)	upregulated
RING1B_27294783_Chip-Seq_ESCs_Mouse	-1.40419	25.7088	4.11907e-07	1.1186e-08	['BARHL1', 'MOXD1', 'SEMA5B', 'FLT1', 'VIPR2', 'CTNND2', 'TNC', 'RAX', 'IKZF1', 'HAPLN4', 'SOX21', 'GLI3', 'GLI2', 'CYP26B1', 'SIX6', 'EDNRB', 'HTR7', 'KCNT2', 'ZIC2', 'DPYSL5', 'FAM110C', 'KIF1A', 'FEZF1', 'PKNOX2', 'DUSP4', 'FOXD3', 'CADPS2', 'SLC30A3', 'SLC6A15', 'IGFBP3', 'FST', 'SLC2A12', 'PAX3', 'SOX14', 'ETV1', 'SOX11', 'GFRA1', 'SHISA2', 'SORCS3', 'DUSP6', 'ADRA2A', 'SHISA6', 'CLDN3', 'MY…	ChEA (experimentally validated targets)	upregulated
SOX2_human_tf_ARCHS4_coexpression	-1.54414	26.3202	1.36659e-06	3.95692e-08	['CRB2', 'NLGN3', 'SEMA5B', 'ADCYAP1R1', 'CTNND2', 'RPS4Y1', 'TSPAN11', 'SOX21', 'GLI2', 'CDH4', 'RASSF10', 'SALL2', 'ZIC2', 'PODXL', 'DPYSL3', 'SRY', 'FGFBP3', 'VRTN', 'FZD7', 'ZIC5', 'SYT6', 'POU3F4', 'SFRP2', 'TMSB15A', 'SMOC1', 'LRRN1']	ARCHS4 (coexpressed genes)	upregulated
GLI2_human_tf_ARCHS4_coexpression	-1.55598	26.522	1.36659e-06	3.95692e-08	['CRB2', 'FKBP10', 'FBN3', 'TSPAN11', 'GLI3', 'SALL2', 'ZIC2', 'PODXL', 'ADAMTS19', 'IGLON5', 'HES3', 'RHBDL3', 'VRTN', 'ADAMTS7', 'FZD7', 'SPRY4', 'ZBTB12', 'ZIC5', 'SFRP2', 'COL2A1', 'COL4A6', 'ROR1', 'LRRN1', 'MFGE8', 'FBXL7', 'PHC1P1']	ARCHS4 (coexpressed genes)	upregulated
NEUROD4_human_tf_ARCHS4_coexpression	-1.57563	26.857	1.36659e-06	3.95692e-08	['WFIKKN1', 'FAM57B', 'CRABP1', 'ZDHHC22', 'TULP1', 'SOGA3', 'TSPAN11', 'NKAIN1', 'IGFBPL1', 'KIF19', 'DPYSL5', 'DPYSL3', 'NEFM', 'RHBDL3', 'TP53I11', 'BTBD17', 'SLC6A15', 'SOX11', 'C14ORF132', 'POU3F4', 'NOVA2', 'CNTN2', 'LHX5', 'LRRN1', 'PLCH2', 'RNF165']	ARCHS4 (coexpressed genes)	upregulated
EN2_human_tf_ARCHS4_coexpression	-1.62652	27.7243	1.36659e-06	3.95692e-08	['CRB2', 'NLGN3', 'SEMA5B', 'NTM', 'CTNND2', 'LYPD1', 'TSPAN11', 'SOX21', 'TCEAL7', 'DPYSL5', 'HES5', 'KCNIP1', 'GFRA1', 'C14ORF132', 'POU3F4', 'SHISA6', 'PNMA6A', 'PTPRD', 'TOX3', 'LRFN2', 'TMSB15A', 'NOVA2', 'FEZ1', 'RNF182', 'FAT3', 'RNF165']	ARCHS4 (coexpressed genes)	upregulated
TCF12_human_tf_ARCHS4_coexpression	-1.53125	26.1004	1.36659e-06	3.95692e-08	['NLGN3', 'SEMA5B', 'ADCYAP1R1', 'COLGALT2', 'ZDHHC22', 'TSPAN11', 'SOX21', 'TRIM9', 'IGFBPL1', 'PTPRZ1', 'RHBDL3', 'CA14', 'BTBD17', 'PAX3', 'ETV1', 'SOX11', 'C14ORF132', 'POU3F4', 'PTPRD', 'MAPK10', 'TOX3', 'SYT11', 'FEZ1', 'SMOC1', 'LRRN1', 'FAT3']	ARCHS4 (coexpressed genes)	upregulated
DPF1_human_tf_ARCHS4_coexpression	-1.61865	27.5902	1.36659e-06	3.95692e-08	['NLGN3', 'BEX1', 'FAM57B', 'CTNND2', 'TMEM59L', 'JPH4', 'CDH4', 'SV2A', 'DPYSL5', 'SLC22A17', 'TCEAL2', 'DPYSL3', 'KIF1A', 'CTNNA2', 'PIANP', 'MAPK10', 'NFASC', 'ADGRB2', 'SYT11', 'FAM131B', 'FEZ1', 'REEP2', 'PTPN5', 'PRR36', 'ASTN1', 'RNF165']	ARCHS4 (coexpressed genes)	upregulated
ARNT2_human_tf_ARCHS4_coexpression	-1.49937	25.557	1.36659e-06	3.95692e-08	['KCNA1', 'CTNND2', 'TMEM59L', 'ATP1A2', 'JPH4', 'TRIM9', 'SV2A', 'SLC22A17', 'KIF1A', 'CTNNA2', 'OPCML', 'CA11', 'CADM3', 'LYNX1', 'PIANP', 'IQSEC3', 'B3GAT1', 'ST8SIA3', 'C14ORF132', 'NFASC', 'ADGRB2', 'SYT11', 'FAM131B', 'CNTN1', 'PTPN5', 'ASTN1']	ARCHS4 (coexpressed genes)	upregulated
DMRT1_human_tf_ARCHS4_coexpression	-1.61335	27.4998	1.85234e-06	3.95692e-08	['LUZP4', 'ZNF492', 'SPESP1', 'DCAF4L2', 'DDX43', 'TPTE', 'SERBP1P6', 'SYCE1', 'VN1R87P', 'ZNF723P', 'MAEL', 'RNF17', 'HORMAD1', 'FGF23', 'ZYG11A', 'ZNF99', 'RBMXL2', 'RP11-1217F2.22', 'RP11-126O22.1', 'TBPL2', 'FRG1FP', 'AL590762.7', 'MAGEB1', 'SYCP3', 'HDGFL1', 'ZNF676']	ARCHS4 (coexpressed genes)	downregulated
BMI1_23680149_ChIP-Seq_NPCS_Mouse	-1.98907	32.2635	3.13962e-06	9.02766e-08	['BARHL1', 'RAX', 'SIX6', 'HTR7', 'ZIC2', 'EMILIN3', 'NEFM', 'RSPO1', 'FGFBP3', 'FEZF1', 'PCDHAC2', 'PLEKHG3', 'FOXD3', 'GRID2', 'EDN1', 'SLC30A3', 'SLC6A15', 'FST', 'PAX3', 'SOX14', 'DKK1', 'TM4SF1', 'DUSP6', 'ADRA2A', 'CLDN3', 'COL2A1', 'PKP1', 'VWA2', 'SCN4B', 'FREM2', 'HMX2', 'KCNA1', 'TMEM59L', 'CRABP1', 'IL20RA', 'WNT8B', 'NTS', 'PTHLH', 'ADCY5', 'CALCR', 'FRZB', 'WIF1', 'SLITRK3', 'GBP2', …	ChEA (experimentally validated targets)	upregulated
EBF3_human_tf_ARCHS4_coexpression	-1.58107	24.7994	4.5478e-06	1.54163e-07	['NTM', 'CTNND2', 'SOGA3', 'TSPAN11', 'NKAIN1', 'IGFBPL1', 'SV2A', 'DPYSL5', 'WIF1', 'IGLON5', 'DPYSL3', 'NEFM', 'CTNNA2', 'RHBDL3', 'GFRA1', 'C14ORF132', 'MARCH4', 'PTPRD', 'NFASC', 'PPP1R1A', 'CNTN2', 'LHX5', 'FAT3', 'PRR36', 'RNF165']	ARCHS4 (coexpressed genes)	upregulated
DACH1_human_tf_ARCHS4_coexpression	-1.57136	24.6471	4.5478e-06	1.54163e-07	['CRB2', 'SEMA5B', 'CASC10', 'BEX1', 'CTNND2', 'TSPAN11', 'JAKMIP2', 'NKAIN1', 'TCEAL7', 'CDH4', 'IGFBPL1', 'KCNT2', 'DPYSL5', 'DPYSL3', 'CTNNA2', 'SOX11', 'POU3F4', 'PTPRD', 'MAPK10', 'TOX3', 'TMSB15A', 'LIX1', 'COL4A6', 'LHX5', 'RNF165']	ARCHS4 (coexpressed genes)	upregulated
HES3_human_tf_ARCHS4_coexpression	-1.57028	24.6302	4.5478e-06	1.54163e-07	['FBN3', 'GRIK5', 'KLHDC7A', 'GRPR', 'GLI2', 'HTR7', 'SALL2', 'PODXL', 'IGLON5', 'DPYSL3', 'RHBDL3', 'VRTN', 'ADAMTS7', 'FOXD3', 'FZD7', 'ZBTB12', 'ZIC5', 'SYT6', 'SFRP2', 'ROR1', 'LRRN1', 'SMPDL3B', 'MFGE8', 'PHC1P1', 'PRR36']	ARCHS4 (coexpressed genes)	upregulated
ZNF521_human_tf_ARCHS4_coexpression	-1.50416	23.5931	4.5478e-06	1.54163e-07	['NLGN3', 'GRIK5', 'CTNND2', 'TCEAL7', 'ZIC2', 'DPYSL5', 'RSPO1', 'CTNNA2', 'FEZF1', 'CA14', 'ADAMTS7', 'BTBD17', 'SOX11', 'C14ORF132', 'PTPRD', 'MAPK10', 'NELL2', 'COL2A1', 'SYT11', 'TMSB15A', 'LIX1', 'FEZ1', 'COL4A6', 'ASTN1', 'RNF165']	ARCHS4 (coexpressed genes)	upregulated
RORB_human_tf_ARCHS4_coexpression	-1.45235	22.7805	4.5478e-06	1.54163e-07	['KCNA1', 'CTNND2', 'TMEM59L', 'JPH4', 'TRIM9', 'SV2A', 'SLC22A17', 'CLVS2', 'KIF1A', 'CTNNA2', 'FEZF1', 'OPCML', 'CA11', 'CADM3', 'IQSEC3', 'B3GAT1', 'ST8SIA3', 'GRIN2B', 'PTPRD', 'NFASC', 'SYT11', 'FAM131B', 'CNTN1', 'DGKI', 'ASTN1']	ARCHS4 (coexpressed genes)	upregulated
BMP2_human_tf_ARCHS4_coexpression	-1.4303	22.4347	4.5478e-06	1.54163e-07	['MAGEB17', 'CHRNA9', 'AFP', 'GRPR', 'CALCR', 'HEPH', 'CER1', 'NEBL', 'MMP1', 'FZD7', 'FST', 'COL22A1', 'FAM189A2', 'C8ORF4', 'P3H2', 'APOA1', 'TM4SF1', 'CYP26A1', 'CCKBR', 'SMOC1', 'SLCO2A1', 'COL4A6', 'ALPK2', 'RAB17', 'EPHA2']	ARCHS4 (coexpressed genes)	upregulated
ZNF536_human_tf_ARCHS4_coexpression	-1.55851	24.4456	4.5478e-06	1.54163e-07	['NLGN3', 'CTNND2', 'GRIK3', 'JAKMIP2', 'TCEAL7', 'DPYSL5', 'SLC22A17', 'CLVS2', 'KIF1A', 'CTNNA2', 'B3GAT1', 'SOX11', 'C14ORF132', 'POU3F4', 'PTPRD', 'MAPK10', 'NELL2', 'NRG3', 'SYT11', 'TMSB15A', 'FAM131B', 'FEZ1', 'FAT3', 'ASTN1', 'RNF165']	ARCHS4 (coexpressed genes)	upregulated
EZH2_27304074_Chip-Seq_ESCs_Mouse	-2.05663	32.0374	5.65655e-06	1.71684e-07	['SEMA5B', 'FLT1', 'CTNND2', 'GRIK3', 'RAX', 'HAPLN4', 'CHRDL1', 'SOX21', 'SOX3', 'CDH4', 'CYP26B1', 'ZIC2', 'PDE4B', 'KIF1A', 'FEZF1', 'PKNOX2', 'GRID2', 'SLC30A3', 'FST', 'PAX3', 'SOX14', 'GFRA1', 'ADRA2A', 'COL2A1', 'FAM84A', 'PKP1', 'VWA2', 'SCN4B', 'FREM2', 'HMX2', 'CTTNBP2', 'WNT8B', 'LIN7A', 'ADCY8', 'ADCY5', 'RASSF10', 'FRZB', 'SLITRK3', 'GCNT4', 'RHBDL3', 'DRD4', 'EGR2', 'IQSEC3', 'SYT6'…	ChEA (experimentally validated targets)	upregulated
TCF24_human_tf_ARCHS4_coexpression	-1.95704	30.6967	6.41489e-06	1.54163e-07	['KHDC3L', 'KHDC1L', 'DPPA3P2', 'HOXD13', 'RP11-257K9.8', 'ZNF723P', 'MKRN4P', 'C1DP2', 'TRIM60', 'TRIM53AP', 'NAA11', 'DNAJC15', 'KLF17', 'FOXR1', 'TRIM75P', 'ARGFX', 'RP11-1217F2.22', 'AC078899.3', 'FAM151A', 'DPPA3', 'CEACAM6', 'ZNF735', 'DPPA5', 'ZNF534', 'BRDT']	ARCHS4 (coexpressed genes)	downregulated
RHOXF2_human_tf_ARCHS4_coexpression	-1.72039	26.9847	6.41489e-06	1.54163e-07	['AC104131.1', 'DCAF4L2', 'DPPA3P2', 'BX004987.1', 'DSCR4', 'ZNF723P', 'DSCR8', 'RPL23AP42', 'AC097374.2', 'NAA11', 'RP11-347H15.5', 'TEKT4P2', 'KLF17', 'FOXR1', 'ARGFX', 'AC145212.1', 'HOXB9', 'CR1L', 'FAM151A', 'DPPA3', 'MAGEB2', 'ZNF735', 'MAGEB1', 'GTSF1', 'BRDT']	ARCHS4 (coexpressed genes)	downregulated
E2F6_human_tf_ARCHS4_coexpression	-1.6684	26.1693	6.41489e-06	1.54163e-07	['LUZP4', 'KHDC3L', 'DCAF4L2', 'DDX43', 'DPPA3P2', 'TPTE', 'VN1R87P', 'ZNF723P', 'HORMAD1', 'DSCR8', 'TRIM60', 'NAA11', 'PHKA1', 'KLF17', 'FOXR1', 'TRIM75P', 'ARGFX', 'RP11-1217F2.22', 'AC078899.3', 'DPPA3', 'MAGEB2', 'ZNF735', 'AL590762.7', 'MAGEB1', 'HDGFL1']	ARCHS4 (coexpressed genes)	downregulated
OVOL2_human_tf_ARCHS4_coexpression	-1.66028	26.0419	6.41489e-06	1.54163e-07	['KHDC3L', 'KHDC1L', 'AC073333.1', 'DPPA3P2', 'RP11-257K9.8', 'ZNF723P', 'MKRN4P', 'C1DP2', 'TRIM60', 'TRIM53AP', 'NAA11', 'DNAJC15', 'ALPPL2', 'KLF17', 'FOXR1', 'TRIM75P', 'ARGFX', 'RP11-1217F2.22', 'FAM151A', 'DPPA3', 'ZFP42', 'ZNF735', 'DPPA5', 'ZNF534', 'BRDT']	ARCHS4 (coexpressed genes)	downregulated
TRIM28_21343339_ChIP-Seq_HEK293_Human	-3.44642	51.1103	1.13493e-05	3.62596e-07	['NNMT', 'LUM', 'IGFBP3', 'C8ORF4', 'UBE2L6', 'NTS', 'SOX21', 'TM4SF1', 'HAPLN1', 'BST2', 'SIX6', 'RHBDL3', 'CA14']	ChEA (experimentally validated targets)	upregulated
FOXG1_human_tf_ARCHS4_coexpression	-1.48562	21.3468	1.53606e-05	5.74938e-07	['NLGN3', 'CASC10', 'CTTNBP2', 'NTM', 'CTNND2', 'B3GAT1', 'GRIK3', 'GLI3', 'GLI2', 'JAKMIP2', 'PTPRD', 'NELL2', 'CDH4', 'PTPRZ1', 'DPYSL5', 'TMSB15A', 'LIX1', 'FEZ1', 'RNF182', 'CTNNA2', 'FEZF1', 'PRR36', 'ASTN1', 'RNF165']	ARCHS4 (coexpressed genes)	upregulated
BARHL2_human_tf_ARCHS4_coexpression	-1.64585	23.6492	1.53606e-05	5.74938e-07	['CA11', 'CADM3', 'CTNND2', 'IQSEC3', 'TMEM59L', 'GDF1', 'ADCY2', 'ZIC5', 'JPH4', 'IGSF21', 'NFASC', 'HRH3', 'FAM131C', 'SYT11', 'SV2A', 'DPYSL5', 'SLC22A17', 'FAM131B', 'DPYSL3', 'REEP2', 'CLVS2', 'CNTN2', 'FEZF1', 'PRR36']	ARCHS4 (coexpressed genes)	upregulated
POU5F1_human_tf_ARCHS4_coexpression	-1.53883	22.1114	1.53606e-05	5.74938e-07	['FOXD3', 'FBN3', 'FZD7', 'SPRY4', 'PLA2G3', 'KLHDC7A', 'ZBTB12', 'ZDHHC22', 'ZIC5', 'SYT6', 'SFRP2', 'HTR7', 'SALL2', 'PODXL', 'ADAMTS19', 'IGLON5', 'ROR1', 'LRRN1', 'RAB17', 'HES3', 'MFGE8', 'VRTN', 'PHC1P1', 'ADAMTS7']	ARCHS4 (coexpressed genes)	upregulated
NHLH1_human_tf_ARCHS4_coexpression	-1.56564	22.4967	1.53606e-05	5.74938e-07	['BTBD17', 'WFIKKN1', 'B3GAT1', 'CRABP1', 'SOX11', 'TSPAN11', 'SHISA6', 'NKAIN1', 'IGSF21', 'NFASC', 'IGFBPL1', 'KIF19', 'PPP1R1A', 'SYT11', 'DPYSL5', 'NOVA2', 'DPYSL3', 'CNTN2', 'LHX5', 'NEFM', 'RHBDL3', 'FEZF1', 'TP53I11', 'RNF165']	ARCHS4 (coexpressed genes)	upregulated
ZNF25_human_tf_ARCHS4_coexpression	-1.57306	22.6034	1.53606e-05	5.74938e-07	['CADM3', 'BEX1', 'CTNND2', 'TMEM59L', 'ST8SIA3', 'C14ORF132', 'MAPK10', 'JPH4', 'TCEAL7', 'TRIM9', 'NFASC', 'SYT11', 'DPYSL5', 'FAM131B', 'FEZ1', 'TCEAL2', 'SLITRK3', 'CLVS2', 'CNTN1', 'KIF1A', 'CTNNA2', 'PTPN5', 'ASTN1', 'OPCML']	ARCHS4 (coexpressed genes)	upregulated
ZNF830_human_tf_ARCHS4_coexpression	-1.74238	25.0363	2.32772e-05	5.74938e-07	['TRIM60', 'TRIM61', 'KHDC3L', 'KHDC1L', 'TRIM53AP', 'NAA11', 'DPPA3P2', 'DNAJC15', 'KLF17', 'FOXR1', 'TRIM75P', 'ARGFX', 'RP11-1217F2.22', 'AC016739.2', 'RP11-257K9.8', 'FAM151A', 'DPPA3', 'ZNF723P', 'ZNF735', 'AL928654.7', 'MKRN4P', 'RPL5P29', 'BRDT', 'C1DP2']	ARCHS4 (coexpressed genes)	downregulated
SALL3_human_tf_ARCHS4_coexpression	-1.4721	19.2814	4.75782e-05	2.04962e-06	['FOXD3', 'PCYT1B', 'FZD7', 'GRIK3', 'ETV1', 'ZIC5', 'SEZ6L', 'TSPAN11', 'GLI2', 'SYT6', 'TOX3', 'SFRP2', 'PTPRZ1', 'SALL2', 'ZIC2', 'LIX1', 'LRRN1', 'FAT3', 'LRRC3B', 'CSMD2', 'CA14', 'VRTN', 'PRR36']	ARCHS4 (coexpressed genes)	upregulated
RAPGEF5_human_tf_ARCHS4_coexpression	-1.44318	18.9025	4.75782e-05	2.04962e-06	['CA11', 'CADPS2', 'CADM3', 'LYNX1', 'KCNA1', 'CTNND2', 'IQSEC3', 'B3GAT1', 'ST8SIA3', 'ATP1A2', 'PTPRD', 'JPH4', 'NFASC', 'SYT11', 'SV2A', 'SLC22A17', 'FAM131B', 'CLVS2', 'CNTN1', 'SPOCK1', 'KIF1A', 'SCN4B', 'OPCML']	ARCHS4 (coexpressed genes)	upregulated
HAND1_human_tf_ARCHS4_coexpression	-1.46012	19.1245	4.75782e-05	2.04962e-06	['CRB2', 'LUM', 'CGB8', 'IGFBP3', 'IGF2', 'P3H2', 'VTCN1', 'SYTL5', 'HAPLN1', 'CYP26A1', 'ACTC1', 'MYL7', 'FRZB', 'PODXL', 'PLSCR5', 'COL4A6', 'ID3', 'SNAI2', 'SLC27A6', 'ALPK2', 'FREM1', 'RSPO4', 'FREM2']	ARCHS4 (coexpressed genes)	upregulated
INSM1_human_tf_ARCHS4_coexpression	-1.63	21.3495	4.75782e-05	2.04962e-06	['SEMA5B', 'BEX1', 'BTBD17', 'WFIKKN1', 'CTNND2', 'PLEKHA6', 'SOX11', 'C14ORF132', 'TSPAN11', 'NKAIN1', 'NFASC', 'IGFBPL1', 'PPP1R1A', 'SYT11', 'DPYSL5', 'DPYSL3', 'CNTN2', 'LHX5', 'NEFM', 'CTNNA2', 'RHBDL3', 'PRR36', 'RNF165']	ARCHS4 (coexpressed genes)	upregulated
POU3F4_human_tf_ARCHS4_coexpression	-1.58026	20.698	4.75782e-05	2.04962e-06	['NLGN3', 'SEMA5B', 'BEX1', 'NTM', 'CTNND2', 'SOX11', 'C14ORF132', 'TSPAN11', 'SOX21', 'JAKMIP2', 'PTPRD', 'MAPK10', 'TOX3', 'TCEAL7', 'SYT11', 'DPYSL5', 'TMSB15A', 'NOVA2', 'FEZ1', 'FAT3', 'CTNNA2', 'HES5', 'RNF165']	ARCHS4 (coexpressed genes)	upregulated
PATZ1_human_tf_ARCHS4_coexpression	-1.56535	20.5028	4.75782e-05	2.04962e-06	['SEMA5B', 'FBN3', 'GRIK5', 'RAX', 'ZBTB12', 'ZIC5', 'TSPAN11', 'SOX21', 'POU3F4', 'NKAIN1', 'SFRP2', 'SALL2', 'ZIC2', 'DPYSL5', 'PODXL', 'IGLON5', 'DPYSL3', 'LHX5', 'LRRN1', 'HES5', 'CACNG4', 'VRTN', 'ADAMTS7']	ARCHS4 (coexpressed genes)	upregulated
TCF7L1_human_tf_ARCHS4_coexpression	-1.48132	19.4021	4.75782e-05	2.04962e-06	['FOXD3', 'FBN3', 'UCMA', 'FZD7', 'PLA2G3', 'KLHDC7A', 'ZIC5', 'GLI2', 'SYT6', 'SFRP2', 'HTR7', 'SALL2', 'ZIC2', 'PODXL', 'ADAMTS19', 'ROR1', 'LRRN1', 'SMPDL3B', 'HES3', 'MFGE8', 'FBXL7', 'CA14', 'PHC1P1']	ARCHS4 (coexpressed genes)	upregulated
SLC26A10_human_tf_ARCHS4_coexpression	-1.73885	22.7752	4.75782e-05	2.04962e-06	['NLGN3', 'CADM3', 'PIANP', 'CTTNBP2', 'FAM57B', 'LMO3', 'TMEM59L', 'PLPPR5', 'FAM189A1', 'LIN7A', 'C14ORF132', 'NELL2', 'NFASC', 'SYT11', 'SV2A', 'DPYSL5', 'SLC22A17', 'FEZ1', 'TCEAL2', 'DPYSL3', 'REEP2', 'ASTN1', 'RNF165']	ARCHS4 (coexpressed genes)	upregulated
EZH2_B cell_hg19	-1.63139	26.375	7.60736e-05	9.5211e-08	['MOXD1', 'FKBP10', 'SEMA5B', 'FLT1', 'C2ORF40', 'SCT', 'FAM57B', 'GRIK3', 'F13A1', 'HAPLN3', 'HAPLN4', 'TRIM9', 'HTR7', 'SALL2', 'DPYSL5', 'SLC22A17', 'FAM110C', 'KIF1A', 'RSPO1', 'FGFBP3', 'PKNOX2', 'ADAMTS7', 'DUSP4', 'PTGIS', 'SLC30A3', 'VSTM2L', 'SEZ6L', 'DKK1', 'ETV5', 'ADRA2A', 'EPN3', 'SFRP2', 'CLDN3', 'COL2A1', 'CCKBR', 'FEZ1', 'NOS1AP', 'CDC42EP1', 'ROR1', 'SCN4B', 'DGKI', 'EPHA2', 'RNF…	ENCODE (experimentally validated targets)	upregulated
PHC1_16625203_ChIP-ChIP_MESCs_Mouse	-2.67034	33.8718	9.23792e-05	3.09898e-06	['SEMA5B', 'FLT1', 'KCNA1', 'CRABP1', 'RAX', 'TULP1', 'ADCY8', 'HAPLN4', 'SOX21', 'SOX3', 'CDH4', 'SIX6', 'HTR7', 'ZIC2', 'FRZB', 'PODXL', 'ADAMTS19', 'SLITRK3', 'HES5', 'OPCML', 'DUSP4', 'CADPS2', 'EGR2', 'SLC30A3', 'NEBL', 'FST', 'ST8SIA3', 'IGF2', 'HTR1A', 'PAX3', 'SOX11', 'GFRA1', 'SEZ6L', 'SORCS3', 'POU3F4', 'AR', 'CYP26A1', 'CYP24A1', 'SFRP2', 'CLDN3', 'COL2A1', 'PKP1', 'ID3', 'CDC42EP1', '…	ChEA (experimentally validated targets)	upregulated
TERF2IP_human_tf_ARCHS4_coexpression	-1.46361	17.3779	0.000137158	6.97414e-06	['NLGN3', 'CADM3', 'BEX1', 'TMEM59L', 'C14ORF132', 'JAKMIP2', 'MAPK10', 'JPH4', 'NFASC', 'SYT11', 'SV2A', 'DPYSL5', 'SLC22A17', 'FAM131B', 'FEZ1', 'TCEAL2', 'REEP2', 'CLVS2', 'KIF1A', 'CTNNA2', 'PTPN5', 'ASTN1']	ARCHS4 (coexpressed genes)	upregulated
PLXNA2_human_tf_ARCHS4_coexpression	-1.46451	17.3886	0.000137158	6.97414e-06	['CADM3', 'CTNND2', 'B3GAT1', 'GRIK3', 'PDGFB', 'PLEKHA6', 'C14ORF132', 'HSPG2', 'PTPRD', 'JPH4', 'NFASC', 'CDH4', 'ADGRB2', 'SYT11', 'DPYSL5', 'FAM131B', 'DPYSL3', 'KIF1A', 'TNIK', 'CTNNA2', 'PRR36', 'ADAMTS7']	ARCHS4 (coexpressed genes)	upregulated
KIAA1549_human_tf_ARCHS4_coexpression	-1.48611	17.645	0.000137158	6.97414e-06	['NLGN3', 'BEX1', 'FAM57B', 'NTM', 'CTNND2', 'SOX11', 'C14ORF132', 'GRIN2B', 'JAKMIP2', 'PTPRD', 'JPH4', 'NKAIN1', 'NFASC', 'CDH4', 'SYT11', 'DPYSL5', 'DPYSL3', 'LHX5', 'FAT3', 'CSMD2', 'PRR36', 'RNF165']	ARCHS4 (coexpressed genes)	upregulated
ZIC5_human_tf_ARCHS4_coexpression	-1.53084	18.1761	0.000137158	6.97414e-06	['FOXD3', 'GRID2', 'UCMA', 'FZD7', 'PLA2G3', 'KLHDC7A', 'GLI2', 'SYT6', 'SFRP2', 'SALL2', 'PODXL', 'ADAMTS19', 'RP11-640N20.6', 'COL4A6', 'ROR1', 'LRRN1', 'SMPDL3B', 'HES3', 'FEZF1', 'RSPO4', 'CA14', 'VRTN']	ARCHS4 (coexpressed genes)	upregulated
RGS7_human_tf_ARCHS4_coexpression	-1.40756	16.7124	0.000137158	6.97414e-06	['CA11', 'CADM3', 'LYNX1', 'KCNA1', 'CTNND2', 'IQSEC3', 'TMEM59L', 'B3GAT1', 'ST8SIA3', 'PNMA3', 'SEZ6L', 'HAPLN4', 'JPH4', 'ADGRB2', 'SYT11', 'SV2A', 'SLC22A17', 'FAM131B', 'CLVS2', 'CNTN1', 'KIF1A', 'OPCML']	ARCHS4 (coexpressed genes)	upregulated
BARHL1_human_tf_ARCHS4_coexpression	-1.62246	19.264	0.000137158	6.97414e-06	['CADM3', 'WSCD2', 'GRIK5', 'CTNND2', 'IQSEC3', 'TMEM59L', 'CRABP1', 'JPH4', 'IGSF21', 'NFASC', 'CDH4', 'SV2A', 'SLC22A17', 'FAM131B', 'IGLON5', 'REEP2', 'COL4A6', 'CNTN2', 'KIF1A', 'CTNNA2', 'RHBDL3', 'PRR36']	ARCHS4 (coexpressed genes)	upregulated
ZNF365_human_tf_ARCHS4_coexpression	-1.41066	16.7492	0.000137158	6.97414e-06	['CA11', 'CADM3', 'LYNX1', 'KCNA1', 'IQSEC3', 'TMEM59L', 'B3GAT1', 'ST8SIA3', 'HAPLN4', 'JPH4', 'NFASC', 'ADGRB2', 'SYT11', 'SV2A', 'SLC22A17', 'FAM131B', 'CLVS2', 'CNTN1', 'SPOCK1', 'KIF1A', 'ASTN1', 'OPCML']	ARCHS4 (coexpressed genes)	upregulated
ZNF821_human_tf_ARCHS4_coexpression	-1.56761	18.6127	0.000137158	6.97414e-06	['NLGN3', 'BEX1', 'BTBD17', 'FAM57B', 'TMEM59L', 'CRABP1', 'SOX11', 'POU3F4', 'MAPK10', 'IGSF21', 'TCEAL7', 'IGFBPL1', 'SYT11', 'DPYSL5', 'TMSB15A', 'FEZ1', 'DPYSL3', 'REEP2', 'LHX5', 'CTNNA2', 'PRR36', 'RNF165']	ARCHS4 (coexpressed genes)	upregulated
GATA4_human_tf_ARCHS4_coexpression	-1.59595	18.9492	0.000137158	6.97414e-06	['FHOD3', 'BEX1', 'NEBL', 'UCMA', 'MAGEB17', 'P3H2', 'APOA1', 'AFP', 'GRPR', 'SERPINA5', 'PNMA6A', 'DAZL', 'CYP26A1', 'MYL7', 'COL2A1', 'CCKBR', 'SLCO2A1', 'ALPK3', 'ALPK2', 'RAB17', 'CER1', 'CD99']	ARCHS4 (coexpressed genes)	upregulated
TBR1_human_tf_ARCHS4_coexpression	-1.61206	19.1405	0.000137158	6.97414e-06	['SEMA5B', 'BEX1', 'GRIK5', 'CTNND2', 'TMEM59L', 'B3GAT1', 'ADCY2', 'JPH4', 'IGSF21', 'NFASC', 'PPP1R1A', 'SV2A', 'DPYSL5', 'SLC22A17', 'DPYSL3', 'REEP2', 'LHX5', 'NEFM', 'CTNNA2', 'YPEL4', 'FEZF1', 'RNF165']	ARCHS4 (coexpressed genes)	upregulated
SETBP1_human_tf_ARCHS4_coexpression	-1.41092	16.7523	0.000137158	6.97414e-06	['NLGN3', 'SEMA5B', 'CTNND2', 'SOX11', 'POU3F4', 'JAKMIP2', 'PTPRD', 'MAPK10', 'TOX3', 'NFASC', 'KCNT2', 'DOK5', 'SYT11', 'DPYSL5', 'FEZ1', 'DPYSL3', 'RNF182', 'FAT3', 'CTNNA2', 'CSMD2', 'ASTN1', 'RNF165']	ARCHS4 (coexpressed genes)	upregulated
SNAI1_human_tf_ARCHS4_coexpression	-1.71646	20.3801	0.000248744	6.97414e-06	['TRIM60', 'KHDC3L', 'KHDC1L', 'TRIM53AP', 'NAA11', 'DPPA3P2', 'KLF4', 'DNAJC15', 'KLF17', 'FOXR1', 'TRIM75P', 'ARGFX', 'RP11-1217F2.22', 'RP11-257K9.8', 'FAM151A', 'DPPA3', 'ZNF723P', 'ZNF735', 'TNFSF9', 'OLR1', 'BRDT', 'C1DP2']	ARCHS4 (coexpressed genes)	downregulated
ZFP57_human_tf_ARCHS4_coexpression	-1.77081	21.0253	0.000248744	6.97414e-06	['RTP3', 'NLRP2B', 'KHDC1L', 'GDF3', 'DEFB122', 'DNAJC15', 'ALPPL2', 'FGF4', 'PDCL2', 'HOXA9', 'DNMT3L', 'VN1R87P', 'ZNF729', 'NLRP7', 'CAT', 'ZFP42', 'NLRP2', 'HORMAD1', 'DPPA5', 'RP11-420K14.3', 'RP11-420K14.6', 'CH507-9B2.2']	ARCHS4 (coexpressed genes)	downregulated
TFDP3_human_tf_ARCHS4_coexpression	-1.69502	20.1255	0.000248744	6.97414e-06	['TKTL1', 'RTP3', 'LUZP4', 'MOGAT3', 'AC104131.1', 'NAA11', 'DCAF4L2', 'DDX43', 'TPTE', 'COX7B2', 'KNG1', 'PDCL2', 'SYCE1', 'BHMT', 'VN1R87P', 'RP11-1217F2.22', 'MAEL', 'MAGEB2', 'RNF17', 'HORMAD1', 'MAGEB1', 'ZNF676']	ARCHS4 (coexpressed genes)	downregulated
HOXD9_human_tf_ARCHS4_coexpression	-1.61542	19.1804	0.000248744	6.97414e-06	['ANKRD26P1', 'HOXD13', 'HOXC13', 'CTAG2', 'HOXC11', 'SERPINH1P1', 'HOXC10', 'HOXA11', 'AL590235.1', 'HOXA10', 'THEG', 'HOXA9', 'HOXB9', 'HOXD3', 'ZNF578', 'HOXA7', 'HOXC9', 'HOXB7', 'HOXD8', 'MNX1', 'HMX1', 'HOXA4']	ARCHS4 (coexpressed genes)	downregulated
YY1_human_tf_ARCHS4_coexpression	-1.65607	19.663	0.000248744	6.97414e-06	['TRIM60', 'KHDC3L', 'KHDC1L', 'TRIM53AP', 'NAA11', 'DPPA3P2', 'DNAJC15', 'KLF17', 'FOXR1', 'TRIM75P', 'ARGFX', 'RP11-1217F2.22', 'RP11-257K9.8', 'FAM151A', 'DPPA3', 'ZNF723P', 'ZNF735', 'MKRN4P', 'ZNF534', 'BRDT', 'C1DP2', 'CH507-9B2.2']	ARCHS4 (coexpressed genes)	downregulated
SMAD4_21799915_ChIP-Seq_A2780_Human	-1.18557	13.6904	0.000274856	9.65946e-06	['SEMA5A', 'SEMA5B', 'CTNND2', 'TTC29', 'GRPR', 'CLDN1', 'GLI3', 'CALB2', 'CDH4', 'SIX6', 'HTR7', 'KCNT2', 'EMILIN3', 'PDE4B', 'ME3', 'STK32A', 'FEZF1', 'RSPO4', 'GRID2', 'PCYT1B', 'EDN1', 'KCND2', 'TRPC4', 'LMO3', 'SLC6A15', 'SLC2A12', 'PAX3', 'GFRA1', 'PDYN', 'SYTL5', 'SORCS3', 'ETV5', 'DUSP6', 'SHISA6', 'TOX3', 'AR', 'GPRIN2', 'NRG3', 'OPTC', 'LIX1', 'NOS1AP', 'COL4A6', 'FAM84A', 'PKP1', 'ROR1…	ChEA (experimentally validated targets)	upregulated
NHLH2_human_tf_ARCHS4_coexpression	-1.61124	17.2353	0.000372339	2.26138e-05	['BARHL1', 'NECAB2', 'ST6GAL2', 'CTNND2', 'LIN7A', 'SOX11', 'POU3F4', 'SHISA6', 'NKAIN1', 'IGSF21', 'TCEAL7', 'IGFBPL1', 'DPYSL5', 'TMSB15A', 'NOVA2', 'DPYSL3', 'CNTN2', 'LHX5', 'NEFM', 'CTNNA2', 'RNF165']	ARCHS4 (coexpressed genes)	upregulated
TSC22D1_human_tf_ARCHS4_coexpression	-1.43371	15.3363	0.000372339	2.26138e-05	['NLGN3', 'BEX1', 'IQSEC3', 'TMEM59L', 'ATP1A2', 'C14ORF132', 'MAPK10', 'TCEAL7', 'TRIM9', 'SYT11', 'SV2A', 'DPYSL5', 'SLC22A17', 'FEZ1', 'CNTN1', 'SLC27A6', 'KIF1A', 'CTNNA2', 'HLA-DOA', 'PTPN5', 'ASTN1']	ARCHS4 (coexpressed genes)	upregulated
ST18_human_tf_ARCHS4_coexpression	-1.54691	16.5472	0.000372339	2.26138e-05	['BEX1', 'CRABP1', 'ST8SIA3', 'PLEKHA6', 'SORBS2', 'SOX11', 'C14ORF132', 'SEZ6L', 'SHISA6', 'JAKMIP2', 'PTPRD', 'MAPK10', 'NFASC', 'SYT11', 'DPYSL5', 'SCG5', 'CLVS2', 'CNTN1', 'CNTN2', 'CTNNA2', 'RNF165']	ARCHS4 (coexpressed genes)	upregulated
FEZF1_human_tf_ARCHS4_coexpression	-1.46484	15.6693	0.000372339	2.26138e-05	['BTBD17', 'WFIKKN1', 'PCDH20', 'SOX11', 'ZIC5', 'SYT9', 'TTC29', 'NELL2', 'TCEAL7', 'IGFBPL1', 'KCNT2', 'SALL2', 'ZIC2', 'DPYSL5', 'TMSB15A', 'CNTN2', 'NEFM', 'CYYR1', 'GAL3ST3', 'PRR36', 'RNF165']	ARCHS4 (coexpressed genes)	upregulated
SOHLH1_human_tf_ARCHS4_coexpression	-1.42882	15.284	0.000372339	2.26138e-05	['EPHB6', 'CA11', 'CADM3', 'LYNX1', 'PIANP', 'LGI4', 'IQSEC3', 'TMEM59L', 'B3GAT1', 'FAM189A1', 'PNMA3', 'HAPLN4', 'PNMA6A', 'JPH4', 'HRH3', 'ADGRB2', 'SV2A', 'SLC22A17', 'FAM131B', 'KIF1A', 'SCN4B']	ARCHS4 (coexpressed genes)	upregulated
HMGA2_human_tf_ARCHS4_coexpression	-1.45387	15.5519	0.000372339	2.26138e-05	['FKBP10', 'FBN3', 'COL13A1', 'TMEM200A', 'MMP1', 'FZD7', 'SPRY4', 'P3H2', 'ZIC5', 'GLI2', 'SFRP2', 'COL2A1', 'SALL2', 'ZIC2', 'PODXL', 'COL4A6', 'ID3', 'LRRN1', 'MFGE8', 'VRTN', 'EPHA2']	ARCHS4 (coexpressed genes)	upregulated
RGS11_human_tf_ARCHS4_coexpression	-1.44339	15.4398	0.000372339	2.26138e-05	['CA11', 'CADM3', 'LYNX1', 'PIANP', 'KCNA1', 'CTNND2', 'IQSEC3', 'TMEM59L', 'B3GAT1', 'ATP1A2', 'PNMA3', 'HAPLN4', 'JPH4', 'NFASC', 'ADGRB2', 'SYT11', 'SV2A', 'SLC22A17', 'FAM131B', 'KIF1A', 'OPCML']	ARCHS4 (coexpressed genes)	upregulated
SOX12_human_tf_ARCHS4_coexpression	-1.54161	16.4905	0.000372339	2.26138e-05	['NLGN3', 'FKBP10', 'GRIK5', 'CTNND2', 'SOX11', 'ZBTB12', 'SOGA3', 'POU3F4', 'NKAIN1', 'CDH4', 'SALL2', 'SV2A', 'DPYSL5', 'SLC22A17', 'IGLON5', 'DPYSL3', 'LHX5', 'CACNG4', 'PRR36', 'ADAMTS7', 'RNF165']	ARCHS4 (coexpressed genes)	upregulated
FMNL2_human_tf_ARCHS4_coexpression	-1.43694	15.3709	0.000372339	2.26138e-05	['CA11', 'CADM3', 'LYNX1', 'KCNA1', 'CTNND2', 'B3GAT1', 'ATP1A2', 'PTPRD', 'JPH4', 'TRIM9', 'NFASC', 'ADGRB2', 'SYT11', 'SV2A', 'SLC22A17', 'FAM131B', 'CLVS2', 'SPOCK1', 'KIF1A', 'ASTN1', 'OPCML']	ARCHS4 (coexpressed genes)	upregulated
SLC4A10_human_tf_ARCHS4_coexpression	-1.37449	14.7028	0.000372339	2.26138e-05	['CA11', 'CADM3', 'LYNX1', 'KCNA1', 'IQSEC3', 'TMEM59L', 'B3GAT1', 'ST8SIA3', 'GRIN2B', 'MAPK10', 'JPH4', 'TRIM9', 'SYT11', 'SV2A', 'SLC22A17', 'FAM131B', 'CLVS2', 'CNTN1', 'KIF1A', 'CTNNA2', 'OPCML']	ARCHS4 (coexpressed genes)	upregulated
RFX3_human_tf_ARCHS4_coexpression	-1.40691	15.0496	0.000372339	2.26138e-05	['SEMA5B', 'BTBD17', 'FOXJ1', 'SOX11', 'TTC29', 'JAKMIP2', 'PTPRD', 'MAPK10', 'NELL2', 'TOX3', 'TRIM9', 'KCNT2', 'SYT11', 'DPYSL5', 'TMSB15A', 'FEZ1', 'FAT3', 'CTNNA2', 'FEZF1', 'ASTN1', 'RNF165']	ARCHS4 (coexpressed genes)	upregulated
ZNF608_human_tf_ARCHS4_coexpression	-1.42061	15.1962	0.000372339	2.26138e-05	['NLGN3', 'FBN3', 'GRIK5', 'CTNND2', 'SOGA3', 'TSPAN11', 'JAKMIP2', 'PTPRD', 'NFASC', 'CDH4', 'IGFBPL1', 'SALL2', 'SYT11', 'DPYSL5', 'FEZ1', 'DPYSL3', 'LRRN1', 'CTNNA2', 'PTPN5', 'PRR36', 'RNF165']	ARCHS4 (coexpressed genes)	upregulated
TP63_human_tf_ARCHS4_coexpression	-1.42135	15.2041	0.000372339	2.26138e-05	['TENM2', 'CDSN', 'KRT5', 'CLDN1', 'CST6', 'PTHLH', 'XG', 'NIPAL4', 'ANO1', 'ALDH3B2', 'C1ORF116', 'KRT17', 'GJB3', 'FAM110C', 'KRT14', 'HAS3', 'LY6D', 'SNAI2', 'ITGB6', 'PLCH2', 'KRT6A']	ARCHS4 (coexpressed genes)	upregulated
DACH2_human_tf_ARCHS4_coexpression	-1.48218	15.8549	0.000372339	2.26138e-05	['NLGN3', 'BEX1', 'LMO3', 'PLEKHA6', 'C14ORF132', 'SEZ6L', 'GRIN2B', 'JAKMIP2', 'MAPK10', 'NELL2', 'NRG3', 'SYT11', 'DPYSL5', 'TMSB15A', 'FEZ1', 'TCEAL2', 'CNTN1', 'FAT3', 'GCNT4', 'CTNNA2', 'ASTN1']	ARCHS4 (coexpressed genes)	upregulated
REST_21632747_ChIP-Seq_MESCs_Mouse	-1.23443	13.4262	0.000514375	1.88988e-05	['BARHL1', 'FHOD3', 'VIPR2', 'FAM57B', 'GRIK5', 'CTNND2', 'GRIK3', 'TNC', 'KLHDC7A', 'PLAT', 'CPZ', 'SOX21', 'GLI3', 'GLI2', 'JPH4', 'TRIM9', 'CDH4', 'CYP26B1', 'SIX6', 'HTR7', 'DPYSL5', 'NEFM', 'GRID2', 'EDN1', 'PTGIS', 'KCND2', 'CD300A', 'MAMDC2', 'VSTM2L', 'SOX14', 'PDYN', 'SORCS3', 'TM4SF1', 'ADRA2A', 'SHISA6', 'TOX3', 'NRG3', 'DOK5', 'MFNG', 'ASTN1', 'RNF165', 'ADCYAP1R1', 'RAMP2', 'NXPH2', …	ChEA (experimentally validated targets)	upregulated
BACH1_22875853_ChIP-PCR_HELA_AND_SCP4_Human	-1.96484	21.1779	0.000543683	2.08441e-05	['FLT1', 'CTNND2', 'PLAT', 'SOX21', 'CLDN1', 'CDH4', 'CYP26B1', 'EDNRB', 'HEPH', 'CA3', 'UTY', 'HLA-DOA', 'CER1', 'TGM2', 'IER3', 'SLC13A3', 'MMP1', 'IGFBP3', 'FST', 'C8ORF4', 'SOX11', 'PDYN', 'DUSP6', 'AR', 'CLDN3', 'MFNG', 'SLCO2A1', 'TFF3', 'ROR1', 'LTB', 'CFTR', 'DGKI', 'NNMT', 'COL11A1', 'ABCB4', 'LYPD1', 'CHRNA9', 'WNT8B', 'RHOBTB1', 'MUC1', 'SNTG2', 'CST1', 'HRH3', 'PTPRZ1', 'FRZB', 'KCNIP…	ChEA (experimentally validated targets)	upregulated
SMAD3_21741376_ChIP-Seq_EPCs_Human	-1.60843	16.9485	0.000662462	2.6528e-05	['SEMA5A', 'GRIK3', 'CPZ', 'GRPR', 'GLI3', 'HAPLN1', 'CDH4', 'KCNT2', 'PDE4B', 'ME3', 'ITGB6', 'CER1', 'GRID2', 'EDN1', 'SLC6A15', 'IGFBP3', 'FST', 'C8ORF4', 'SOX11', 'GFRA1', 'SHISA2', 'PDYN', 'SEZ6L', 'SORCS3', 'DKK1', 'ETV5', 'TM4SF1', 'NRG3', 'DOK5', 'PKP1', 'MFGE8', 'CAMK1G', 'FREM2', 'PRKAA2', 'NTM', 'SLC1A1', 'STC1', 'ADCY2', 'ADCY5', 'IGSF21', 'CALCR', 'RASSF10', 'WIF1', 'SLITRK3', 'HAS3'…	ChEA (experimentally validated targets)	upregulated
P300_19829295_ChIP-Seq_ESCs_Human	-1.47924	15.5333	0.000662462	2.75144e-05	['FKBP10', 'CXCL6', 'GRPR', 'GLI3', 'SOX3', 'EDNRB', 'HTR7', 'KCNT2', 'DPYSL3', 'STK32A', 'FEZF1', 'PCDHAC2', 'FOXD3', 'GRID2', 'PCYT1B', 'EDN1', 'KCND2', 'SLC6A15', 'IGFBP3', 'C8ORF4', 'SOX14', 'ETV1', 'SOX11', 'ZFY', 'TM4SF1', 'DUSP6', 'ADRA2A', 'SHISA6', 'COL2A1', 'CCKBR', 'DOK5', 'LIX1', 'ALDH1A1', 'FAM84A', 'PKP1', 'CDC42EP1', 'FREM1', 'DGKI', 'NXPH2', 'CTTNBP2', 'NTM', 'LYPD1', 'IL20RA', 'S…	ChEA (experimentally validated targets)	upregulated
ZNF98_human_tf_ARCHS4_coexpression	-1.68886	18.0656	0.000752788	2.26138e-05	['TRIM60', 'ZNF560', 'LUZP4', 'ZNF492', 'KHDC3L', 'KHDC1L', 'AC073333.1', 'ZNF99', 'FGF4', 'VN1R87P', 'RP11-1217F2.22', 'ZNF729', 'AC109486.1', 'ZNF728', 'GAPDHP14', 'ZNF723P', 'RNF17', 'ZNF849P', 'ZNF676', 'ZNF257', 'BRDT']	ARCHS4 (coexpressed genes)	downregulated
YY2_human_tf_ARCHS4_coexpression	-1.61843	17.3123	0.000752788	2.26138e-05	['TKTL1', 'LUZP4', 'SPESP1', 'NAA11', 'DCAF4L2', 'DDX53', 'DDX43', 'CSNK1A1P1', 'RP11-347H15.5', 'RGPD4', 'PSMA8', 'FOXR1', 'VN1R87P', 'TATDN2P1', 'MAEL', 'MAGEB2', 'RNF17', 'AK4P3', 'HDGFL1', 'ZNF257', 'HMX1']	ARCHS4 (coexpressed genes)	downregulated
GSC_human_tf_ARCHS4_coexpression	-1.59157	17.0249	0.000752788	2.26138e-05	['TRIM60', 'AGL', 'KHDC1L', 'TRIM53AP', 'NAA11', 'DPPA3P2', 'GDF3', 'DNAJC15', 'RP11-807H22.6', 'KLF17', 'SPIC', 'FOXR1', 'TRIM75P', 'DNMT3L', 'TATDN2P1', 'RP11-257K9.8', 'FAM151A', 'DPPA3', 'ZNF735', 'C1DP2', 'CH507-9B2.2']	ARCHS4 (coexpressed genes)	downregulated
EBF4_human_tf_ARCHS4_coexpression	-1.44178	13.7986	0.00098773	6.97549e-05	['NLGN3', 'ADCYAP1R1', 'PIANP', 'GRIK5', 'CTNND2', 'B3GAT1', 'GDF1', 'AFP', 'ZDHHC22', 'SOX21', 'CX3CL1', 'ADGRB2', 'SV2A', 'SLC22A17', 'SMOC1', 'DPYSL3', 'RHBDL3', 'CACNG4', 'PRR36', 'ASTN1']	ARCHS4 (coexpressed genes)	upregulated
PRDM14_human_tf_ARCHS4_coexpression	-1.48889	14.2495	0.00098773	6.97549e-05	['FOXD3', 'FBN3', 'PCYT1B', 'FZD7', 'KLHDC7A', 'ZIC5', 'GRPR', 'SYT6', 'SFRP2', 'HTR7', 'SALL2', 'ZIC2', 'PODXL', 'ADAMTS19', 'ROR1', 'LRRN1', 'SMPDL3B', 'HES3', 'VRTN', 'PHC1P1']	ARCHS4 (coexpressed genes)	upregulated
SOX21_human_tf_ARCHS4_coexpression	-1.49942	14.3502	0.00098773	6.97549e-05	['CRB2', 'SEMA5B', 'FZD7', 'CTNND2', 'STON1', 'TSPAN11', 'SYT6', 'POU3F4', 'TOX3', 'SFRP2', 'SALL2', 'TMSB15A', 'SMOC1', 'COL4A6', 'LRRN1', 'FAT3', 'RHBDL3', 'FGFBP3', 'FEZF1', 'HES5']	ARCHS4 (coexpressed genes)	upregulated
ZNF618_human_tf_ARCHS4_coexpression	-1.60375	15.3487	0.00098773	6.97549e-05	['CRB2', 'SEMA5B', 'FBN3', 'GRIK5', 'TSPAN11', 'GLI2', 'NKAIN1', 'CDH4', 'C1ORF226', 'ASTL', 'SALL2', 'DPYSL5', 'IGLON5', 'DPYSL3', 'LHX5', 'LRRN1', 'HES5', 'PRR36', 'ADAMTS7', 'RNF165']	ARCHS4 (coexpressed genes)	upregulated
LHX9_human_tf_ARCHS4_coexpression	-1.50795	14.4318	0.00098773	6.97549e-05	['NECAB2', 'BEX1', 'BTBD17', 'CRABP1', 'C14ORF132', 'IGSF21', 'TCEAL7', 'NFASC', 'IGFBPL1', 'SYT11', 'DPYSL5', 'TMSB15A', 'DPYSL3', 'REEP2', 'CNTN2', 'LHX5', 'RHBDL3', 'FEZF1', 'TP53I11', 'RNF165']	ARCHS4 (coexpressed genes)	upregulated
PBX3_human_tf_ARCHS4_coexpression	-1.5379	14.7185	0.00098773	6.97549e-05	['BEX1', 'PLPPR5', 'LIN7A', 'GFRA1', 'C14ORF132', 'POU3F4', 'PTPRD', 'MAPK10', 'CALB2', 'NKAIN1', 'TCEAL7', 'IGFBPL1', 'DOK5', 'DPYSL5', 'TMSB15A', 'ZMAT4', 'FEZ1', 'DPYSL3', 'CTNNA2', 'RNF165']	ARCHS4 (coexpressed genes)	upregulated
POU4F1_human_tf_ARCHS4_coexpression	-1.64298	15.7242	0.00098773	6.97549e-05	['NECAB2', 'RP6-24A23.6', 'FAM57B', 'CTNND2', 'C14ORF132', 'POU3F4', 'SHISA6', 'CALB2', 'NKAIN1', 'TCEAL7', 'IGFBPL1', 'DPYSL5', 'NOVA2', 'DPYSL3', 'CNTN2', 'ATP6V1G2-DDX39B', 'TNIK', 'RHBDL3', 'GNRHR2P1', 'RNF165']	ARCHS4 (coexpressed genes)	upregulated
SALL4_human_tf_ARCHS4_coexpression	-1.4266	13.6533	0.00098773	6.97549e-05	['FOXD3', 'FBN3', 'MAGEB17', 'FZD7', 'SHISA2', 'ZIC5', 'GRPR', 'SYT6', 'SFRP2', 'CCKBR', 'SALL2', 'ZIC2', 'PODXL', 'ADAMTS19', 'ROR1', 'LRRN1', 'HES3', 'CA14', 'VRTN', 'PHC1P1']	ARCHS4 (coexpressed genes)	upregulated
ZNF704_human_tf_ARCHS4_coexpression	-1.37271	13.1376	0.00098773	6.97549e-05	['NEBL', 'KCNA1', 'CTNND2', 'B3GAT1', 'GRIK3', 'SORBS2', 'SEZ6L', 'GRIN2B', 'PTPRD', 'TOX3', 'NFASC', 'SYT11', 'FAM131B', 'DPYSL3', 'CLVS2', 'FAT3', 'KIF1A', 'DGKI', 'PRR36', 'ASTN1']	ARCHS4 (coexpressed genes)	upregulated
SOX13_human_tf_ARCHS4_coexpression	-1.47497	14.1163	0.00098773	6.97549e-05	['FBN3', 'FZD7', 'RARRES2', 'SPRY4', 'PLEKHA6', 'KLHDC7A', 'ZBTB12', 'MUC1', 'C1ORF226', 'SFRP2', 'ASTL', 'SALL2', 'PODXL', 'LRRN1', 'RAB17', 'HES3', 'MFGE8', 'VRTN', 'PHC1P1', 'PRR36']	ARCHS4 (coexpressed genes)	upregulated
THRA_human_tf_ARCHS4_coexpression	-1.3758	13.1672	0.00098773	6.97549e-05	['CA11', 'CADM3', 'ADCYAP1R1', 'LYNX1', 'CTNND2', 'IQSEC3', 'TMEM59L', 'B3GAT1', 'GDF1', 'ATP1A2', 'JPH4', 'NFASC', 'ADGRB2', 'SYT11', 'SV2A', 'SLC22A17', 'FAM131B', 'KIF1A', 'ASTN1', 'OPCML']	ARCHS4 (coexpressed genes)	upregulated
RAPGEF4_human_tf_ARCHS4_coexpression	-1.35543	12.9722	0.00098773	6.97549e-05	['CA11', 'CADM3', 'LYNX1', 'KCNA1', 'CTNND2', 'IQSEC3', 'TMEM59L', 'B3GAT1', 'ATP1A2', 'PNMA3', 'HAPLN4', 'JPH4', 'ADGRB2', 'SYT11', 'SV2A', 'SLC22A17', 'FAM131B', 'CNTN1', 'KIF1A', 'OPCML']	ARCHS4 (coexpressed genes)	upregulated
NKX6-2_human_tf_ARCHS4_coexpression	-1.42233	13.6125	0.00098773	6.97549e-05	['CA11', 'CADM3', 'LYNX1', 'LGI4', 'CTNND2', 'IQSEC3', 'TMEM59L', 'B3GAT1', 'GDF1', 'JPH4', 'IGSF21', 'NFASC', 'SYT11', 'SV2A', 'SLC22A17', 'FAM131B', 'FEZ1', 'REEP2', 'CNTN2', 'KIF1A']	ARCHS4 (coexpressed genes)	upregulated
NEUROG1_human_tf_ARCHS4_coexpression	-1.4233	13.6217	0.00098773	6.97549e-05	['BTBD17', 'WFIKKN1', 'FAM57B', 'GRIK5', 'GFRA1', 'C14ORF132', 'SPATC1L', 'ZDHHC22', 'SOGA3', 'NKAIN1', 'IGFBPL1', 'KIF19', 'HRH3', 'LHX5', 'NEFM', 'PLCH2', 'RHBDL3', 'TP53I11', 'ADAMTS7', 'CCNJL']	ARCHS4 (coexpressed genes)	upregulated
NUFIP1_human_tf_ARCHS4_coexpression	-1.69504	16.2224	0.00208986	6.97549e-05	['TRIM60', 'KHDC3L', 'KHDC1L', 'TRIM53AP', 'NAA11', 'DPPA3P2', 'DNAJC15', 'KLF17', 'FOXR1', 'TRIM75P', 'ARGFX', 'RP11-257K9.8', 'FAM151A', 'DPPA3', 'ZNF723P', 'ZFP42', 'ZNF735', 'DPPA5', 'BRDT', 'C1DP2']	ARCHS4 (coexpressed genes)	downregulated
ZNF581_human_tf_ARCHS4_coexpression	-1.61642	15.47	0.00208986	6.97549e-05	['TRIM60', 'KHDC3L', 'KHDC1L', 'TRIM53AP', 'NAA11', 'DPPA3P2', 'DNAJC15', 'KLF17', 'FOXR1', 'TRIM75P', 'ARGFX', 'RP11-1217F2.22', 'RP11-257K9.8', 'FAM151A', 'DPPA3', 'ZNF723P', 'H3F3AP4', 'ZNF735', 'ZNF534', 'BRDT']	ARCHS4 (coexpressed genes)	downregulated
HOXA4_human_tf_ARCHS4_coexpression	-1.72343	16.4942	0.00208986	6.97549e-05	['AC097374.2', 'HOXD13', 'HOXC11', 'HOXC10', 'HOXA11', 'HOXA10', 'HOXA9', 'AC145212.1', 'HOXB9', 'RP11-39C10.1', 'RP11-166J22.1', 'HOXD3', 'HOXA7', 'HOXC9', 'HOXD9', 'HOXB7', 'HOXD8', 'RPL23AP42', 'BP-21264C1.1', 'HMX1']	ARCHS4 (coexpressed genes)	downregulated
CUL2_human_tf_ARCHS4_coexpression	-1.57791	15.1015	0.00208986	6.97549e-05	['TRIM60', 'KHDC3L', 'TRIM53AP', 'NAA11', 'DCAF4L2', 'DDX43', 'DPPA3P2', 'KLF17', 'FOXR1', 'TRIM75P', 'ARGFX', 'RP11-1217F2.22', 'RP11-257K9.8', 'ZNF728', 'DPPA3', 'ZNF723P', 'ZNF735', 'HDGFL1', 'BRDT', 'C1DP2']	ARCHS4 (coexpressed genes)	downregulated
HOXA1_human_tf_ARCHS4_coexpression	-1.57861	15.1081	0.00208986	6.97549e-05	['TCEA1P2', 'ZNF705D', 'KHDC3L', 'SUSD2', 'KHDC1L', 'DPPA3P2', 'HOXD13', 'HOXC13', 'HOXA11', 'FGF4', 'FOXR1', 'ARGFX', 'ACTBL2', 'FAM151A', 'DPPA3', 'ZNF723P', 'DPPA5', 'ZNF534', 'HMX1', 'BRDT']	ARCHS4 (coexpressed genes)	downregulated
OTP_human_tf_ARCHS4_coexpression	-1.56363	13.2844	0.002494	0.000204311	['BEX1', 'ST6GAL2', 'KCND2', 'CRABP1', 'SORCS3', 'TSPAN11', 'POU3F4', 'NKAIN1', 'SOX3', 'NFASC', 'CYP2A13', 'DPYSL5', 'FEZ1', 'DPYSL3', 'LHX5', 'CTNNA2', 'STK32A', 'RP11-343C2.9', 'RNF165']	ARCHS4 (coexpressed genes)	upregulated
IRX2_human_tf_ARCHS4_coexpression	-1.58107	13.4326	0.002494	0.000204311	['CRB2', 'SEMA5B', 'TENM2', 'PTGIS', 'BEX1', 'SOX21', 'SSTR3', 'POU3F4', 'TOX3', 'CDH4', 'HRH3', 'SALL2', 'DPYSL5', 'DPYSL3', 'SCG5', 'LRRN1', 'CNTN4', 'FGFBP3', 'HES5']	ARCHS4 (coexpressed genes)	upregulated
GSC_human_tf_ARCHS4_coexpression	-1.44946	12.3144	0.002494	0.000204311	['DUSP4', 'MAGEB17', 'CPSF1P1', 'RP11-565P22.6', 'FZD7', 'FST', 'P3H2', 'STC1', 'GRPR', 'HAPLN1', 'CYP26A1', 'CALCR', 'CCKBR', 'PODXL', 'SLCO2A1', 'RAB17', 'FREM1', 'CER1', 'VRTN']	ARCHS4 (coexpressed genes)	upregulated
GLI3_human_tf_ARCHS4_coexpression	-1.52312	12.9402	0.002494	0.000204311	['CRB2', 'CTTNBP2', 'SYT9', 'TSPAN11', 'GLI2', 'JAKMIP2', 'CDH4', 'SFRP2', 'COL2A1', 'SALL2', 'ZIC2', 'TMSB15A', 'LIX1', 'IGLON5', 'COL4A6', 'RNF182', 'LRRN1', 'RSPO1', 'HES5']	ARCHS4 (coexpressed genes)	upregulated
FOXH1_human_tf_ARCHS4_coexpression	-1.48921	12.6522	0.002494	0.000204311	['FOXD3', 'FBN3', 'FZD7', 'KLHDC7A', 'ZIC5', 'GRPR', 'SOX21', 'SYT6', 'SFRP2', 'SALL2', 'ZIC2', 'PODXL', 'DPYSL3', 'ROR1', 'LRRN1', 'SMPDL3B', 'HES3', 'RSPO4', 'PHC1P1']	ARCHS4 (coexpressed genes)	upregulated
ZNF248_human_tf_ARCHS4_coexpression	-1.45919	12.3971	0.002494	0.000204311	['BEX1', 'TMEM59L', 'SOX14', 'SOX11', 'C14ORF132', 'SEZ6L', 'JAKMIP2', 'PTPRD', 'MAPK10', 'SYT11', 'DPYSL5', 'FEZ1', 'SLITRK3', 'CLVS2', 'CTNNA2', 'PTPN5', 'CAMK1G', 'ASTN1', 'RNF165']	ARCHS4 (coexpressed genes)	upregulated
OTX1_human_tf_ARCHS4_coexpression	-1.57063	13.3438	0.002494	0.000204311	['BARHL1', 'CRB2', 'CCDC177', 'TENM2', 'CASC10', 'SOX11', 'SOX21', 'GLI3', 'GLI2', 'NELL2', 'TOX3', 'TCEAL7', 'SALL2', 'TMSB15A', 'LIX1', 'COL4A6', 'RSPO1', 'HES5', 'RNF165']	ARCHS4 (coexpressed genes)	upregulated
OTX2_human_tf_ARCHS4_coexpression	-1.42793	12.1315	0.002494	0.000204311	['UCMA', 'FZD7', 'ZIC5', 'GRPR', 'SOX21', 'GNA14', 'CYP26A1', 'CALCR', 'ASTL', 'CCKBR', 'SALL2', 'ZIC2', 'FRZB', 'TMSB15A', 'COL4A6', 'LRRN1', 'RSPO1', 'FEZF1', 'CER1']	ARCHS4 (coexpressed genes)	upregulated
SOX9_human_tf_ARCHS4_coexpression	-1.376	11.6903	0.002494	0.000204311	['ADCYAP1R1', 'NTM', 'CTNND2', 'LYPD1', 'IGF2', 'SEZ6L', 'SOX21', 'ETV5', 'GLI3', 'POU3F4', 'SERPINA5', 'TOX3', 'EDNRB', 'PTPRZ1', 'RASSF10', 'LIX1', 'SMOC1', 'RNF182', 'FGFBP3']	ARCHS4 (coexpressed genes)	upregulated
SORBS2_human_tf_ARCHS4_coexpression	-1.36989	11.6384	0.002494	0.000204311	['FHOD3', 'PRKAA2', 'BEX1', 'ST6GAL2', 'NEBL', 'COL11A1', 'SOX11', 'ADCY5', 'PTPRD', 'MAPK10', 'NFASC', 'ACTC1', 'MYL7', 'DPYSL5', 'NOS1AP', 'SLC27A6', 'ALPK3', 'ALPK2', 'DGKI']	ARCHS4 (coexpressed genes)	upregulated
FOXD3_human_tf_ARCHS4_coexpression	-1.42412	12.0991	0.002494	0.000204311	['FZD7', 'KLHDC7A', 'ZBTB12', 'ZIC5', 'SYT6', 'SFRP2', 'HTR7', 'SALL2', 'ZIC2', 'PODXL', 'ADAMTS19', 'RP11-640N20.6', 'ROR1', 'LRRN1', 'SMPDL3B', 'HES3', 'MFGE8', 'CCDC172', 'PHC1P1']	ARCHS4 (coexpressed genes)	upregulated
TEF_human_tf_ARCHS4_coexpression	-1.32339	11.2433	0.002494	0.000204311	['CA11', 'CADM3', 'LYNX1', 'LGI4', 'KCNA1', 'IQSEC3', 'TMEM59L', 'B3GAT1', 'ATP1A2', 'HAPLN4', 'JPH4', 'ADGRB2', 'SV2A', 'SLC22A17', 'FAM131B', 'SPOCK1', 'KIF1A', 'SCN4B', 'OPCML']	ARCHS4 (coexpressed genes)	upregulated
PBX1_human_tf_ARCHS4_coexpression	-1.31449	11.1677	0.002494	0.000204311	['NTM', 'CTNND2', 'GFRA1', 'SORCS3', 'GRIN2B', 'TSPAN11', 'PTPRD', 'MAPK10', 'JPH4', 'NKAIN1', 'TOX3', 'DPYSL5', 'IGLON5', 'DPYSL3', 'LRRN1', 'FAT3', 'CTNNA2', 'DGKI', 'RNF165']	ARCHS4 (coexpressed genes)	upregulated
ZNF385B_human_tf_ARCHS4_coexpression	-1.30997	11.1293	0.002494	0.000204311	['CA11', 'CADPS2', 'CADM3', 'LYNX1', 'KCNA1', 'IQSEC3', 'B3GAT1', 'ATP1A2', 'EPN3', 'JPH4', 'GPRIN2', 'C1ORF116', 'HRH3', 'ADGRF5', 'CLVS2', 'VWA2', 'KIF1A', 'SCN4B', 'OPCML']	ARCHS4 (coexpressed genes)	upregulated
IRX1_human_tf_ARCHS4_coexpression	-1.38427	11.7606	0.002494	0.000204311	['CRB2', 'SEMA5B', 'TENM2', 'CTNND2', 'TSPAN11', 'SOX21', 'POU3F4', 'PTPRD', 'SOX3', 'CDH4', 'C1ORF226', 'DPYSL5', 'FEZ1', 'DPYSL3', 'LRRN1', 'TNIK', 'FGFBP3', 'HES5', 'CACNG4']	ARCHS4 (coexpressed genes)	upregulated
ZMAT4_human_tf_ARCHS4_coexpression	-1.41555	12.0263	0.002494	0.000204311	['NLGN4Y', 'BEX1', 'CTNND2', 'PLPPR5', 'C14ORF132', 'SYT6', 'PTPRD', 'TCEAL7', 'SIX6', 'ZIC2', 'DOK5', 'SYT11', 'TMSB15A', 'CLVS2', 'LRRN1', 'TNIK', 'LRRC3B', 'PTPN5', 'DGKI']	ARCHS4 (coexpressed genes)	upregulated
SMARCD1_25818293_ChIP-Seq_ESCs_Mouse	-1.29795	11.7984	0.00261501	0.000112788	['TENM2', 'FLT1', 'KDM5D', 'VIPR2', 'F13A1', 'IKZF1', 'GRPR', 'TSPAN11', 'GLI3', 'HAPLN1', 'GLI2', 'TRIM9', 'CDH4', 'EDNRB', 'HTR7', 'KCNT2', 'HEPH', 'DPYSL3', 'ME3', 'UTY', 'PKNOX2', 'GRID2', 'KCND2', 'TRPC4', 'MAMDC2', 'SEZ6L', 'SORCS3', 'SHISA6', 'ANO1', 'ACAP1', 'ASTL', 'NRG3', 'LIX1', 'KCNQ1', 'SCNN1B', 'NOS1AP', 'SCG5', 'COL4A6', 'TNIK', 'FREM2', 'CFTR', 'DGKI', 'RNF165', 'PRKAA2', 'COL11A1…	ChEA (experimentally validated targets)	upregulated
EZH2_skeletal muscle myoblast_hg19	-1.6875	19.6752	0.00345069	8.63752e-06	['GOLT1A', 'FAM57B', 'GRIK3', 'IKZF1', 'HAPLN4', 'CHRDL1', 'HAPLN1', 'CYP26B1', 'SIX6', 'KIF19', 'DPYSL5', 'SLC22A17', 'DPYSL3', 'EMILIN3', 'KIF1A', 'STK32A', 'FGFBP3', 'RSPO4', 'CD177', 'DUSP4', 'CADPS2', 'GRID2', 'SLC30A3', 'KCND2', 'SEZ6L', 'ADRA2A', 'EPN3', 'ANO1', 'CCKBR', 'NRG3', 'VWA2', 'LRRC3B', 'FREM2', 'RNF165', 'ADCYAP1R1', 'RAMP2', 'CTTNBP2', 'KCNA1', 'NTM', 'NR1I2', 'SLC1A1', 'PLA2G3…	ENCODE (experimentally validated targets)	upregulated
CTBP2_25329375_ChIP-Seq_LNCAP_Human	-1.94304	16.8217	0.00388639	0.000173832	['SEMA5A', 'FHOD3', 'COL11A1', 'GRIK3', 'ATP1A2', 'NTS', 'ADCY8', 'C1ORF94', 'ADCY5', 'CDH4', 'KCNT2', 'ADAMTS19', 'ZMAT4', 'FAM110C', 'EMILIN3', 'SLITRK6', 'ZBED2', 'GCNT4', 'CTNNA2', 'CSMD2', 'RSPO4', 'PDZK1P1', 'TGM2', 'OPCML', 'SLC38A4', 'KCND2', 'MUC16', 'STAC', 'SLC6A15', 'PCDH20', 'B3GAT1', 'ETV1', 'C14ORF132', 'ADRA2A', 'SYT6', 'PTPRD', 'TOX3', 'CYP26A1', 'NRG3', 'DOK5', 'SMOC1', 'SYT10',…	ChEA (experimentally validated targets)	upregulated
DROSHA_22980978_ChIP-Seq_HELA_Human	-2.28757	19.2184	0.00484815	0.000224595	['FBN3', 'VIPR2', 'COL13A1', 'CTNND2', 'GRIK3', 'SERPINA5', 'IGSF21', 'PDE4B', 'TMEM132D', 'PTGIS', 'MUC16', 'WSCD2', 'LGI4', 'COL22A1', 'FAM189A1', 'SORCS3', 'SHISA6', 'ANO1', 'SMOC2', 'KCNQ1', 'SMOC1', 'ROR1', 'FAT3', 'CAMK1G', 'EPHA2']	ChEA (experimentally validated targets)	upregulated
ZNF586_human_tf_ARCHS4_coexpression	-1.75619	14.9204	0.00556468	0.000204311	['TRIM60', 'LUZP4', 'KHDC3L', 'DCAF4L2', 'DDX43', 'DPPA3P2', 'RP13-492C18.2', 'RGPD2', 'TMEM154', 'KLF17', 'FOXR1', 'TRIM75P', 'VN1R87P', 'RP11-257K9.8', 'DPPA3', 'ZNF723P', 'AL590762.7', 'HORMAD1', 'RP11-420K14.6']	ARCHS4 (coexpressed genes)	downregulated
ZNF174_human_tf_ARCHS4_coexpression	-1.67622	14.2409	0.00556468	0.000204311	['TRIM60', 'KHDC3L', 'KHDC1L', 'NAA11', 'DPPA3P2', 'KLF17', 'FOXR1', 'TRIM75P', 'ARGFX', 'RP11-1217F2.22', 'RP11-257K9.8', 'AC078899.3', 'RP11-1134I14.2', 'FAM151A', 'DPPA3', 'ZNF723P', 'ZNF735', 'UQCRFS1P1', 'C1DP2']	ARCHS4 (coexpressed genes)	downregulated
RNF113A_human_tf_ARCHS4_coexpression	-1.66205	14.1206	0.00556468	0.000204311	['TRIM60', 'KHDC3L', 'KHDC1L', 'NAA11', 'DPPA3P2', 'DNAJC15', 'KLF17', 'FOXR1', 'TRIM75P', 'ARGFX', 'RP11-257K9.8', 'AC078899.3', 'FAM151A', 'DPPA3', 'ZNF723P', 'ZNF735', 'ZNF534', 'BRDT', 'C1DP2']	ARCHS4 (coexpressed genes)	downregulated
HOXA3_human_tf_ARCHS4_coexpression	-1.64177	13.9483	0.00556468	0.000204311	['HOXD13', 'HOXC11', 'HOXC10', 'HOXA11', 'HOXA10', 'HOXA9', 'TEC', 'HOXB9', 'CAT', 'HOXA1', 'HOXD3', 'HOXA7', 'HOXC9', 'HOXD9', 'HOXB7', 'RP11-420K14.3', 'HOXD8', 'RP11-420K14.6', 'HOXA4']	ARCHS4 (coexpressed genes)	downregulated
ZNF689_human_tf_ARCHS4_coexpression	-1.64106	13.9422	0.00556468	0.000204311	['TRIM61', 'KHDC3L', 'TRIM53AP', 'NAA11', 'DPPA3P2', 'OOEP', 'KLF17', 'FOXR1', 'TRIM75P', 'ARGFX', 'RP11-257K9.8', 'ZNF728', 'DPPA3', 'ZNF723P', 'ZFP42', 'ZNF735', 'AL928654.7', 'BRDT', 'C1DP2']	ARCHS4 (coexpressed genes)	downregulated
BNC1_human_tf_ARCHS4_coexpression	-1.36468	10.201	0.0056155	0.000567102	['TENM2', 'KRT7', 'KRT5', 'SYTL5', 'PTHLH', 'DAZL', 'EPGN', 'C1ORF116', 'KRT17', 'GJB3', 'KRT14', 'HAS3', 'PKP1', 'SNAI2', 'ITGB6', 'PLCH2', 'EPHA2', 'KRT6A']	ARCHS4 (coexpressed genes)	upregulated
VAX1_human_tf_ARCHS4_coexpression	-1.56844	11.7241	0.0056155	0.000567102	['MOXD1', 'BTBD17', 'WFIKKN1', 'COL11A1', 'SLC2A12', 'RP11-761N21.2', 'PAX3', 'PLA2G3', 'SOX11', 'NELL2', 'ZIC2', 'TMSB15A', 'SMOC1', 'SRY', 'FEZF1', 'HES5', 'RP11-343C2.9', 'RNF165']	ARCHS4 (coexpressed genes)	upregulated
FBXO41_human_tf_ARCHS4_coexpression	-1.32524	9.90614	0.0056155	0.000567102	['EPHB6', 'CA11', 'CADM3', 'LYNX1', 'KCNA1', 'IQSEC3', 'TMEM59L', 'B3GAT1', 'PNMA3', 'HAPLN4', 'JPH4', 'HRH3', 'ADGRB2', 'SV2A', 'SLC22A17', 'FAM131B', 'KIF1A', 'OPCML']	ARCHS4 (coexpressed genes)	upregulated
TEAD2_human_tf_ARCHS4_coexpression	-1.32253	9.88586	0.0056155	0.000567102	['FKBP10', 'FBN3', 'FZD7', 'SPRY4', 'ZBTB12', 'ZIC5', 'GLI2', 'SFRP2', 'SALL2', 'PODXL', 'ADAMTS19', 'ROR1', 'LRRN1', 'HES3', 'MFGE8', 'VRTN', 'PHC1P1', 'ADAMTS7']	ARCHS4 (coexpressed genes)	upregulated
ZNF589_human_tf_ARCHS4_coexpression	-1.31845	9.8554	0.0056155	0.000567102	['FOXD3', 'FBN3', 'FZD7', 'PLA2G3', 'KLHDC7A', 'ZIC5', 'SYT6', 'SFRP2', 'SALL2', 'ZIC2', 'PODXL', 'ADAMTS19', 'HMSD', 'ROR1', 'LRRN1', 'HES3', 'VRTN', 'PHC1P1']	ARCHS4 (coexpressed genes)	upregulated
TBX20_human_tf_ARCHS4_coexpression	-1.31693	9.84402	0.0056155	0.000567102	['FHOD3', 'PRKAA2', 'NEBL', 'FAM189A2', 'SORBS2', 'SYTL5', 'ADCY5', 'ACTC1', 'MYL7', 'COL2A1', 'HEPH', 'COL4A6', 'SLC27A6', 'ALPK3', 'ALPK2', 'MFGE8', 'FREM2', 'DGKI']	ARCHS4 (coexpressed genes)	upregulated
MEIS2_human_tf_ARCHS4_coexpression	-1.34111	10.0247	0.0056155	0.000567102	['NEBL', 'CTTNBP2', 'LGI4', 'FAM57B', 'CTNND2', 'PLEKHA6', 'GRIN2B', 'GLI3', 'PTPRD', 'MAPK10', 'NFASC', 'CDH4', 'IGFBPL1', 'DPYSL3', 'SCG5', 'RNF182', 'DGKI', 'RNF165']	ARCHS4 (coexpressed genes)	upregulated
ZNF462_human_tf_ARCHS4_coexpression	-1.30495	9.75449	0.0056155	0.000567102	['FBN3', 'FZD7', 'SOX11', 'ZIC5', 'SOX21', 'POU3F4', 'JAKMIP2', 'PTPRD', 'NKAIN1', 'AR', 'SALL2', 'DPYSL5', 'TMSB15A', 'DPYSL3', 'LRRN1', 'FAT3', 'VRTN', 'RNF165']	ARCHS4 (coexpressed genes)	upregulated
GRHL3_human_tf_ARCHS4_coexpression	-1.27432	9.52549	0.0056155	0.000567102	['SPRR3', 'CDSN', 'KRT5', 'CLDN1', 'EPN3', 'ALDH3B2', 'C1ORF116', 'KRT17', 'GJB3', 'SCNN1B', 'FAM110C', 'KRT14', 'HAS3', 'LY6D', 'PKP1', 'PLCH2', 'EPHA2', 'KRT6A']	ARCHS4 (coexpressed genes)	upregulated
FOXQ1_human_tf_ARCHS4_coexpression	-1.36377	10.1941	0.0056155	0.000567102	['DUSP4', 'SLC22A3', 'RAMP2', 'AMBP', 'FST', 'GRPR', 'CLDN1', 'IL22RA1', 'CYP26A1', 'GJB3', 'SLCO2A1', 'CDC42EP1', 'RAB17', 'A2M', 'NTSR1', 'CER1', 'SNTB1', 'EPHA2']	ARCHS4 (coexpressed genes)	upregulated
PLXNB3_human_tf_ARCHS4_coexpression	-1.26323	9.44264	0.0056155	0.000567102	['CA11', 'CADM3', 'ADCYAP1R1', 'LYNX1', 'LGI4', 'CTNND2', 'IQSEC3', 'TMEM59L', 'B3GAT1', 'GDF1', 'ATP1A2', 'TRIM9', 'NFASC', 'ADGRB2', 'SLC22A17', 'FAM131B', 'CDC42EP1', 'KIF1A']	ARCHS4 (coexpressed genes)	upregulated
ZKSCAN2_human_tf_ARCHS4_coexpression	-1.25759	9.40043	0.0056155	0.000567102	['GLI3', 'JAKMIP2', 'PTPRD', 'NKAIN1', 'IGFBPL1', 'SALL2', 'DOK5', 'SYT11', 'DPYSL5', 'TMSB15A', 'LIX1', 'DPYSL3', 'CLVS2', 'LHX5', 'LRRN1', 'FAT3', 'VAT1L', 'RNF165']	ARCHS4 (coexpressed genes)	upregulated
SMARCA1_human_tf_ARCHS4_coexpression	-1.25747	9.39957	0.0056155	0.000567102	['FKBP10', 'BEX1', 'TMEM200A', 'FZD7', 'FST', 'IGF2', 'P3H2', 'KLHL4', 'HSPG2', 'SERPINA5', 'COL2A1', 'CCKBR', 'SALL2', 'DPYSL3', 'SCG5', 'COL4A6', 'LRRN1', 'FREM1']	ARCHS4 (coexpressed genes)	upregulated
RAX_human_tf_ARCHS4_coexpression	-1.53677	11.4873	0.0056155	0.000567102	['CRB2', 'GRIK5', 'PLA2G3', 'C1ORF21', 'SPATC1L', 'SOX21', 'SIX6', 'SFRP2', 'COL2A1', 'SALL2', 'TMSB15A', 'LIX1', 'SMOC1', 'RNF175', 'FEZF1', 'HES5', 'DRD4', 'ADAMTS7']	ARCHS4 (coexpressed genes)	upregulated
ZSCAN1_human_tf_ARCHS4_coexpression	-1.52361	11.389	0.0056155	0.000567102	['SEMA5B', 'CCDC177', 'BEX1', 'BTBD17', 'WFIKKN1', 'ADCY2', 'TCEAL7', 'PPP1R1A', 'DPYSL5', 'TMSB15A', 'SLC22A17', 'REEP2', 'LHX5', 'NEFM', 'CTNNA2', 'RHBDL3', 'FEZF1', 'RNF165']	ARCHS4 (coexpressed genes)	upregulated
ZFHX2_human_tf_ARCHS4_coexpression	-1.5113	11.2969	0.0056155	0.000567102	['SEMA5B', 'BEX1', 'PIANP', 'FAM57B', 'GRIK5', 'GDF1', 'TSPAN11', 'NKAIN1', 'SOX3', 'NFASC', 'C1ORF226', 'DPYSL5', 'DPYSL3', 'REEP2', 'LHX5', 'NEFM', 'PRR36', 'RNF165']	ARCHS4 (coexpressed genes)	upregulated
ONECUT2_human_tf_ARCHS4_coexpression	-1.48779	11.1212	0.0056155	0.000567102	['BEX1', 'AMBP', 'BTBD17', 'WFIKKN1', 'CRABP1', 'ST8SIA3', 'PLEKHA6', 'NKAIN1', 'NFASC', 'IGFBPL1', 'KCNT2', 'FAM131C', 'CNTN2', 'LHX5', 'NEFM', 'CFTR', 'PRR36', 'RNF165']	ARCHS4 (coexpressed genes)	upregulated
LHX5_human_tf_ARCHS4_coexpression	-1.46932	10.9831	0.0056155	0.000567102	['BEX1', 'WFIKKN1', 'GDF1', 'ADCY2', 'TSPAN11', 'NKAIN1', 'IGSF21', 'NFASC', 'PPP1R1A', 'SV2A', 'DPYSL5', 'DPYSL3', 'REEP2', 'CNTN2', 'NEFM', 'FEZF1', 'PRR36', 'RNF165']	ARCHS4 (coexpressed genes)	upregulated
DBX2_human_tf_ARCHS4_coexpression	-1.4575	10.8948	0.0056155	0.000567102	['SLC13A3', 'ADCYAP1R1', 'KCND2', 'TSLP', 'NTM', 'CTNND2', 'SEZ6L', 'SYT9', 'DKK1', 'ETV5', 'CYP26B1', 'PTPRZ1', 'SYT11', 'FEZ1', 'SMOC1', 'FAT3', 'FGFBP3', 'HES5']	ARCHS4 (coexpressed genes)	upregulated
DEAF1_human_tf_ARCHS4_coexpression	-1.44088	10.7705	0.0056155	0.000567102	['EPHB6', 'CA11', 'CADM3', 'LYNX1', 'TENM2', 'PIANP', 'GRIK5', 'IQSEC3', 'TMEM59L', 'JPH4', 'NFASC', 'ADGRB2', 'SYT11', 'SLC22A17', 'FAM131B', 'REEP2', 'KIF1A', 'PTPN5']	ARCHS4 (coexpressed genes)	upregulated
DBX1_human_tf_ARCHS4_coexpression	-1.43433	10.7216	0.0056155	0.000567102	['CRB2', 'SEMA5B', 'TENM2', 'PAX3', 'ZBTB12', 'TSPAN11', 'GLI2', 'PTPRD', 'TOX3', 'SOX3', 'SFRP2', 'SALL2', 'DPYSL5', 'CNTN2', 'LRRN1', 'HES3', 'RHBDL3', 'ADAMTS7']	ARCHS4 (coexpressed genes)	upregulated
MTA3_human_tf_ARCHS4_coexpression	-1.39422	10.4218	0.0056155	0.000567102	['FOXD3', 'FBN3', 'FZD7', 'KLHDC7A', 'ZIC5', 'SYT6', 'DAZL', 'SFRP2', 'SALL2', 'ZIC2', 'PODXL', 'ADAMTS19', 'ROR1', 'LRRN1', 'SMPDL3B', 'HES3', 'VRTN', 'PHC1P1']	ARCHS4 (coexpressed genes)	upregulated
FGD1_human_tf_ARCHS4_coexpression	-1.38097	10.3227	0.0056155	0.000567102	['FKBP10', 'FBN3', 'FZD7', 'SPRY4', 'ZBTB12', 'MARCH4', 'GLI2', 'SFRP2', 'SALL2', 'ADGRB2', 'PODXL', 'DPYSL3', 'COL4A6', 'LRRN1', 'MFGE8', 'VRTN', 'PHC1P1', 'ADAMTS7']	ARCHS4 (coexpressed genes)	upregulated
CHD7_human_tf_ARCHS4_coexpression	-1.36556	10.2076	0.0056155	0.000567102	['FBN3', 'BTBD17', 'SOX11', 'GLI3', 'JAKMIP2', 'MAPK10', 'NKAIN1', 'TOX3', 'IGFBPL1', 'SALL2', 'ZIC2', 'DPYSL5', 'TMSB15A', 'LRRN1', 'RHBDL3', 'FEZF1', 'PRR36', 'RNF165']	ARCHS4 (coexpressed genes)	upregulated
TRIM23_human_tf_ARCHS4_coexpression	-1.26182	9.4321	0.0056155	0.000567102	['CADM3', 'KCND2', 'KCNA1', 'CTNND2', 'ST8SIA3', 'PTPRD', 'TRIM9', 'SYT11', 'FEZ1', 'TCEAL2', 'CLVS2', 'CNTN1', 'SPOCK1', 'KIF1A', 'CTNNA2', 'ASTN1', 'SNCA', 'OPCML']	ARCHS4 (coexpressed genes)	upregulated
ZFHX4_human_tf_ARCHS4_coexpression	-1.31241	9.81025	0.0056155	0.000567102	['BEX1', 'PLPPR5', 'SOX11', 'SHISA2', 'JAKMIP2', 'MAPK10', 'TOX3', 'TCEAL7', 'ZIC2', 'SYT11', 'DPYSL5', 'TMSB15A', 'DPYSL3', 'COL4A6', 'LHX5', 'FAT3', 'CTNNA2', 'RNF165']	ARCHS4 (coexpressed genes)	upregulated
PRRX2_human_tf_ARCHS4_coexpression	-1.32586	9.91074	0.0056155	0.000567102	['FKBP10', 'TAGLN', 'PTGIS', 'LUM', 'IGFBP3', 'APCDD1L', 'THY1', 'CPZ', 'SOD3', 'DKK1', 'XG', 'MFAP4', 'SNAI2', 'EMILIN1', 'ALPK2', 'TGFBI', 'MFGE8', 'RSPO4']	ARCHS4 (coexpressed genes)	upregulated
WT1_25993318_ChIP-Seq_PODOCYTE_Human	-0.879624	7.20414	0.00578858	0.000277408	['SEMA5A', 'FHOD3', 'SEMA5B', 'CTNND2', 'TNC', 'KLHDC7A', 'PLAT', 'SOX21', 'CDH4', 'EDNRB', 'SALL2', 'EVA1A', 'DPYSL5', 'TGM2', 'PKNOX2', 'IER3', 'CADPS2', 'SOX14', 'SOX11', 'PDYN', 'SHISA6', 'MYL7', 'OPTC', 'SLC27A6', 'ROR1', 'ERP27', 'TNIK', 'FREM1', 'FREM2', 'EPHA2', 'ASTN1', 'NECAB2', 'ADCYAP1R1', 'COL13A1', 'CTTNBP2', 'NTM', 'TGFA', 'THY1', 'NKAIN1', 'IGSF21', 'SNTG2', 'PODXL', 'ZMAT4', 'SLA…	ChEA (experimentally validated targets)	upregulated
SMAD3_21741376_ChIP-Seq_HESCs_Human	-2.54289	20.5395	0.00627075	0.000310532	['SEMA5A', 'FHOD3', 'FLT1', 'GRIK3', 'TNC', 'CPZ', 'GRPR', 'SOX21', 'CLDN1', 'CDH4', 'PDE4B', 'ITGB6', 'CER1', 'IER3', 'SLC13A3', 'EDN1', 'ST6GAL2', 'FST', 'C8ORF4', 'PDYN', 'NRG3', 'DOK5', 'ROR1', 'ALPK2', 'TNIK', 'TLR5', 'FREM1', 'FREM2', 'EPHA2', 'IDO1', 'RNF165', 'NTM', 'SLC1A1', 'IL20RA', 'ADCY2', 'AFP', 'NKAIN1', 'IGSF21', 'RASSF10', 'PODXL', 'TP53I11', 'TMEM132D', 'NEBL', 'WSCD2', 'COL22A1…	ChEA (experimentally validated targets)	upregulated
TP53_20018659_ChIP-ChIP_R1E_Mouse	-2.01432	15.8645	0.00743015	0.000379816	['SEMA5B', 'FLT1', 'COL13A1', 'KCNA1', 'TMEM59L', 'RAX', 'WNT8B', 'KLHDC7A', 'CPZ', 'ADCY8', 'SOX21', 'PTHLH', 'IGSF21', 'SIX6', 'ZIC2', 'FRZB', 'PODXL', 'ADAMTS19', 'NEFM', 'OPCML', 'PKNOX2', 'DUSP4', 'FOXD3', 'EGR2', 'SLC30A3', 'FST', 'IGF2', 'HTR1A', 'PAX3', 'SOX11', 'GFRA1', 'KRT5', 'SEZ6L', 'SORCS3', 'TRERF1', 'ADRA2A', 'NELL2', 'AR', 'CYP26A1', 'CYP24A1', 'COL2A1', 'ASTL', 'TFF3', 'PKP1', '…	ChEA (experimentally validated targets)	upregulated
CTCF_27219007_Chip-Seq_Bcells_Human	-1.39494	10.298	0.0118016	0.000622131	['FHOD3', 'SCT', 'UCMA', 'GRIK3', 'CPZ', 'HAPLN3', 'SOX21', 'CDH4', 'DPYSL5', 'UCN2', 'FGFBP3', 'CA14', 'EDN1', 'APOA1', 'KRT5', 'SHISA2', 'PDYN', 'SORCS3', 'HSPG2', 'EPN3', 'GPRIN2', 'COL2A1', 'OPTC', 'NOS1AP', 'ROR1', 'PTPRCAP', 'S100A9', 'TRIM54', 'CAMK1G', 'FREM2', 'EPHA2', 'LTF', 'SPRR3', 'TAGLN', 'COL13A1', 'KCNA1', 'TMEM59L', 'LYPD1', 'KCNA5', 'ZDHHC22', 'TULP1', 'PTHLH', 'NKAIN1', 'GNA14'…	ChEA (experimentally validated targets)	upregulated
POU2F1_human_tf_ARCHS4_coexpression	-1.25584	8.17547	0.0135985	0.00148853	['FBN3', 'FZD7', 'ZIC5', 'GLI2', 'SYT6', 'NKAIN1', 'SFRP2', 'SALL2', 'ZIC2', 'PODXL', 'TMSB15A', 'ADAMTS19', 'ROR1', 'LRRN1', 'FAT3', 'VRTN', 'RNF165']	ARCHS4 (coexpressed genes)	upregulated
ZNF488_human_tf_ARCHS4_coexpression	-1.25385	8.16252	0.0135985	0.00148853	['CA11', 'CADM3', 'ADCYAP1R1', 'LYNX1', 'CTNND2', 'IQSEC3', 'TMEM59L', 'B3GAT1', 'GDF1', 'ZDHHC22', 'HAPLN4', 'JPH4', 'NFASC', 'ADGRB2', 'SLC22A17', 'FAM131B', 'KIF1A']	ARCHS4 (coexpressed genes)	upregulated
DSP_human_tf_ARCHS4_coexpression	-1.25851	8.19285	0.0135985	0.00148853	['CDSN', 'KRT5', 'CLDN1', 'CST6', 'PTHLH', 'XG', 'EPN3', 'ALDH3B2', 'C1ORF116', 'KRT17', 'GJB3', 'FAM110C', 'KRT14', 'LY6D', 'PKP1', 'ITGB6', 'KRT6A']	ARCHS4 (coexpressed genes)	upregulated
HLF_human_tf_ARCHS4_coexpression	-1.29781	8.4487	0.0135985	0.00148853	['CA11', 'CADM3', 'LYNX1', 'SERPINA1', 'AMBP', 'ABCB4', 'KCNA1', 'IQSEC3', 'IGF2', 'CX3CL1', 'SERPINA5', 'JPH4', 'RAB17', 'A2M', 'FREM1', 'SNTB1', 'OPCML']	ARCHS4 (coexpressed genes)	upregulated
DZIP1_human_tf_ARCHS4_coexpression	-1.29804	8.4502	0.0135985	0.00148853	['FKBP10', 'RP6-24A23.6', 'CTNND2', 'B3GAT1', 'C14ORF132', 'PTPRD', 'SALL2', 'ADGRB2', 'DOK5', 'SYT11', 'SV2A', 'FAM131B', 'REEP2', 'FAT3', 'KIF1A', 'CTNNA2', 'ADAMTS7']	ARCHS4 (coexpressed genes)	upregulated
NFIA_human_tf_ARCHS4_coexpression	-1.31857	8.58381	0.0135985	0.00148853	['CASC10', 'CTTNBP2', 'LMO3', 'SLC6A15', 'GRIK3', 'SORBS2', 'SOX11', 'SHISA2', 'SYT6', 'JAKMIP2', 'PTPRD', 'TOX3', 'PTPRZ1', 'LIX1', 'FAT3', 'LRRC3B', 'OPCML']	ARCHS4 (coexpressed genes)	upregulated
RARB_human_tf_ARCHS4_coexpression	-1.3234	8.6153	0.0135985	0.00148853	['SEMA5A', 'TAGLN', 'NEBL', 'TRPC4', 'LUM', 'MAGEB17', 'P3H2', 'GRPR', 'CYP26A1', 'CCKBR', 'FRZB', 'SNAI2', 'ALPK2', 'CYYR1', 'FREM1', 'CER1', 'DGKI']	ARCHS4 (coexpressed genes)	upregulated
ADAMTS19_human_tf_ARCHS4_coexpression	-1.33974	8.72163	0.0135985	0.00148853	['FOXD3', 'FBN3', 'FZD7', 'KLHDC7A', 'ZIC5', 'SYT6', 'SFRP2', 'HTR7', 'SALL2', 'ZIC2', 'PODXL', 'ROR1', 'LRRN1', 'SPTSSB', 'SMPDL3B', 'FREM2', 'VRTN']	ARCHS4 (coexpressed genes)	upregulated
PLEK2_human_tf_ARCHS4_coexpression	-1.28347	8.35538	0.0135985	0.00148853	['DUSP4', 'TNFRSF6B', 'COL13A1', 'APCDD1L', 'KRT7', 'KRT5', 'PTHLH', 'CST1', 'ASTL', 'KRT17', 'GJB3', 'KRT14', 'S100A4', 'S100A3', 'OCIAD2', 'EPHA2', 'KRT6A']	ARCHS4 (coexpressed genes)	upregulated
BCL6B_human_tf_ARCHS4_coexpression	-1.26295	8.22176	0.0135985	0.00148853	['RAMP2', 'EDN1', 'FLT1', 'PDGFB', 'STC1', 'KLHL4', 'HSPG2', 'GNG11', 'GNA14', 'PODXL', 'SLCO2A1', 'ADGRF5', 'ALPK3', 'CYYR1', 'ADGRL4', 'TP53I11', 'ADAMTS7']	ARCHS4 (coexpressed genes)	upregulated
ZNF398_human_tf_ARCHS4_coexpression	-1.34539	8.75846	0.0135985	0.00148853	['FOXD3', 'CCDC177', 'FZD7', 'KLHDC7A', 'ZBTB12', 'ZIC5', 'CALB2', 'SFRP2', 'HTR7', 'SALL2', 'PODXL', 'DPYSL3', 'ROR1', 'LRRN1', 'HES3', 'VRTN', 'PHC1P1']	ARCHS4 (coexpressed genes)	upregulated
PPP1R13L_human_tf_ARCHS4_coexpression	-1.30792	8.51451	0.0135985	0.00148853	['CDSN', 'KRT7', 'KRT5', 'CLDN1', 'CST6', 'EPN3', 'ALDH3B2', 'C1ORF116', 'KRT17', 'GJB3', 'KRT14', 'LY6D', 'PKP1', 'CDC42EP1', 'PLCH2', 'EPHA2', 'KRT6A']	ARCHS4 (coexpressed genes)	upregulated
HOXD10_human_tf_ARCHS4_coexpression	-1.53286	11.4581	0.0141586	0.000567102	['ANKRD26P1', 'HOXD13', 'HOXC13', 'CTAG2', 'HOXA13', 'HOXC11', 'HOXC10', 'HOXA11', 'HOXA10', 'HOXA9', 'HOXB9', 'HOXD3', 'HOXC9', 'HOXD9', 'HOXD8', 'MNX1', 'HMX1', 'HOXA4']	ARCHS4 (coexpressed genes)	downregulated
HOXC9_human_tf_ARCHS4_coexpression	-1.54528	11.5509	0.0141586	0.000567102	['HOXD13', 'PHKA1', 'HOXC13', 'HOXC11', 'HOXC10', 'HOXA11', 'HOXA10', 'HOXA9', 'HOXB9', 'HOXD3', 'ZNF578', 'HOXD9', 'HOXB7', 'HOXD8', 'MNX1', 'HMX1', 'HOXA4', 'NACAP1']	ARCHS4 (coexpressed genes)	downregulated
ZNF473_human_tf_ARCHS4_coexpression	-1.61143	12.0454	0.0141586	0.000567102	['TKTL1', 'PPP1R2P9', 'NAA11', 'ANKRD26P1', 'DCAF4L2', 'DDX53', 'TPTE', 'RP11-347H15.5', 'PSMA8', 'FOXR1', 'RP11-637O19.3', 'ZFP57', 'SPATA22', 'MAEL', 'MAGEB2', 'RNF17', 'HDGFL1', 'BRDT']	ARCHS4 (coexpressed genes)	downregulated
ZNF215_human_tf_ARCHS4_coexpression	-1.63758	12.2409	0.0141586	0.000567102	['ZYG11A', 'KHDC3L', 'NAA11', 'DPPA3P2', 'ZNF99', 'OOEP', 'NLRP9', 'CNR2', 'DPPA3', 'NLRP4', 'ZNF726', 'ZFP42', 'MAEL', 'NLRP2', 'CMB9-22P13.1', 'DPPA5', 'GTSF1', 'BRDT']	ARCHS4 (coexpressed genes)	downregulated
AKAP8_human_tf_ARCHS4_coexpression	-1.66642	12.4565	0.0141586	0.000567102	['TRIM60', 'KHDC3L', 'KHDC1L', 'TRIM53AP', 'DPPA3P2', 'ATP5F1P7', 'KLF17', 'FOXR1', 'TRIM75P', 'ARGFX', 'RP11-257K9.8', 'FAM151A', 'DPPA3', 'ZNF723P', 'ZNF735', 'BRDT', 'MYO1G', 'C1DP2']	ARCHS4 (coexpressed genes)	downregulated
EZH2_astrocyte_hg19	-1.68982	15.8863	0.0165042	8.26241e-05	['EPHB6', 'MOXD1', 'SEMA5B', 'GOLT1A', 'UBE2L6', 'CDH4', 'KIF19', 'TMSB4Y', 'PDE4B', 'KIF1A', 'UTY', 'STK32A', 'GAL3ST3', 'RSPO4', 'CA14', 'CADPS2', 'LYNX1', 'KCND2', 'CD300A', 'SLC6A15', 'MAMDC2', 'KRT7', 'ETV1', 'SHISA2', 'SORCS3', 'SSTR3', 'ANO1', 'CLDN3', 'CCKBR', 'NRG3', 'DOK5', 'SCNN1B', 'SLC27A6', 'SCN4B', 'FREM2', 'ASTN1', 'RNF165', 'NLGN3', 'RAMP2', 'PRKAA2', 'NXPH2', 'ABCB4', 'SLC1A1', …	ENCODE (experimentally validated targets)	upregulated
EZH2_myotube_hg19	-1.69444	15.9297	0.0165042	8.26241e-05	['MOXD1', 'VIPR2', 'GRIK3', 'UBE2L6', 'CHRDL1', 'CLDN1', 'GLI2', 'SIX6', 'CA3', 'SLC22A17', 'KIF1A', 'PCDHAC2', 'CADPS2', 'PCYT1B', 'SLC30A3', 'KCND2', 'LMO3', 'C8ORF4', 'SORCS3', 'SSTR3', 'TM4SF1', 'EPN3', 'TOX3', 'SFRP2', 'CLDN3', 'CCKBR', 'SCNN1B', 'NOS1AP', 'SLCO2A1', 'ALDH1A1', 'COL4A6', 'FAM84A', 'PKP1', 'SLC27A6', 'SMPDL3B', 'LRRC3B', 'CAMK1G', 'ASTN1', 'LTF', 'NXPH2', 'CTTNBP2', 'KCNA1', …	ENCODE (experimentally validated targets)	upregulated
CBX8_K562_hg19	-1.73589	15.4039	0.0223735	0.00014001	['EPHB6', 'FHOD3', 'MOXD1', 'SEMA5B', 'C2ORF40', 'UCMA', 'STON1', 'UBE2L6', 'SOX21', 'NIPAL4', 'SIX6', 'HTR7', 'KIF19', 'CA3', 'FAM110C', 'RSPO1', 'RSPO4', 'VRTN', 'PKNOX2', 'PCYT1B', 'EDN1', 'PTGIS', 'SLC30A3', 'FST', 'PAX3', 'MAT1A', 'ETV5', 'SFRP2', 'OPTC', 'TMSB15A', 'NOS1AP', 'TFF3', 'PKP1', 'ALPK2', 'SCN4B', 'CAMK1G', 'CTTNBP2', 'CHRNA9', 'IL20RA', 'NOD2', 'TULP1', 'RHOBTB1', 'NKAIN1', 'TCE…	ENCODE (experimentally validated targets)	upregulated
SUZ12_NT2-D1_hg19	-1.79106	15.1651	0.0266757	0.000210266	['BARHL1', 'KCNA1', 'TMEM59L', 'GRIK3', 'ADCY8', 'PTHLH', 'CYP26B1', 'SIX6', 'PDE4B', 'RSPO1', 'FEZF1', 'NTSR1', 'DUSP4', 'FOXD3', 'SLC30A3', 'LMO3', 'IGFBP3', 'PAX3', 'SOX14', 'FOXJ1', 'DUSP6', 'CYP26A1', 'CYP24A1', 'COL2A1', 'SYT10', 'LHX5', 'LRRC3B', 'HMX2', 'ASTN1']	ENCODE (experimentally validated targets)	upregulated
SUZ12_K562_hg19	-1.588	13.278	0.0266757	0.000233704	['FHOD3', 'MOXD1', 'SEMA5B', 'FLT1', 'C2ORF40', 'SOX21', 'HAPLN1', 'NIPAL4', 'SIX6', 'HTR7', 'CA3', 'SLC22A17', 'EMILIN3', 'ME3', 'RSPO1', 'CD177', 'PKNOX2', 'CADPS2', 'SLC30A3', 'KCND2', 'FST', 'MAMDC2', 'KRT7', 'PAX3', 'SHISA2', 'HSPG2', 'TOX3', 'SFRP2', 'CCKBR', 'LY6D', 'PKP1', 'VWA2', 'SCN4B', 'CFTR', 'DGKI', 'SLC22A3', 'FBN3', 'PRKAA2', 'ABCB4', 'TMEM59L', 'SLC1A1', 'CHRNA9', 'IL20RA', 'TGFA…	ENCODE (experimentally validated targets)	upregulated
TBL1_22424771_ChIP-Seq_293T_Human	-1.39697	9.03106	0.0278553	0.00155741	['FLT1', 'GOLT1A', 'GRIK3', 'KLHDC7A', 'TSPAN11', 'HTR7', 'KCNT2', 'PDE4B', 'ME3', 'RSPO1', 'PDZK1P1', 'FOXD3', 'TRPC4', 'LMO3', 'APOA1', 'GFRA1', 'SHISA2', 'SORCS3', 'HSPG2', 'DKK1', 'ADRA2A', 'ANO1', 'NRG3', 'OPTC', 'KCNQ1', 'FEZ1', 'PKP1', 'ROR1', 'VWA2', 'TLR5', 'CAMK1G', 'EPHA2', 'ASTN1', 'PRKAA2', 'NNMT', 'COL13A1', 'COL11A1', 'NTM', 'VTCN1', 'THY1', 'PTHLH', 'RHOBTB1', 'C1ORF94', 'NKAIN1',…	ChEA (experimentally validated targets)	upregulated
SMAD2/3_21741376_ChIP-Seq_EPCs_Human	-1.42824	9.23319	0.0278553	0.00155741	['SEMA5A', 'FKBP10', 'GRIK3', 'KLHDC7A', 'CPZ', 'GRPR', 'HAPLN1', 'SERPINA5', 'CDH4', 'KCNT2', 'EMILIN3', 'PDE4B', 'ME3', 'RSPO4', 'CER1', 'PDZK1P1', 'DUSP4', 'SLC13A3', 'EDN1', 'ST6GAL2', 'SLC6A15', 'IGFBP3', 'FST', 'C8ORF4', 'SOX11', 'SHISA2', 'PDYN', 'SORCS3', 'ETV5', 'TM4SF1', 'SHISA6', 'TOX3', 'NRG3', 'KCNQ1', 'MFGE8', 'CAMK1G', 'DGKI', 'FBN3', 'PRKAA2', 'SLC1A1', 'STC1', 'ADCY2', 'ADCY8', '…	ChEA (experimentally validated targets)	upregulated
WNT8B_human_tf_ARCHS4_coexpression	-1.41603	7.93419	0.0285238	0.00368634	['BTBD17', 'RP6-24A23.6', 'RAX', 'PNMA3', 'NELL2', 'CDH4', 'COL4A6', 'ID3', 'SLC27A6', 'LRRN1', 'RSPO1', 'CYYR1', 'BCO1', 'FEZF1', 'VAT1L', 'ASTN1']	ARCHS4 (coexpressed genes)	upregulated
NPAS4_human_tf_ARCHS4_coexpression	-1.35112	7.57049	0.0285238	0.00368634	['NECAB2', 'BEX1', 'GOLT1A', 'CTTNBP2', 'FAM57B', 'TMEM200A', 'ST8SIA3', 'PLPPR5', 'KCNA5', 'GRIN2B', 'MARCH4', 'TCEAL7', 'NFASC', 'IGFBPL1', 'SCG5', 'PTPN5']	ARCHS4 (coexpressed genes)	upregulated
HESX1_human_tf_ARCHS4_coexpression	-1.34307	7.52537	0.0285238	0.00368634	['UCMA', 'FZD7', 'ZIC5', 'GRPR', 'RPS4Y1', 'SOX21', 'SYT6', 'SFRP2', 'ZIC2', 'ADAMTS19', 'RP11-640N20.6', 'ROR1', 'SRY', 'SMPDL3B', 'FEZF1', 'VRTN']	ARCHS4 (coexpressed genes)	upregulated
ZFP28_human_tf_ARCHS4_coexpression	-1.31777	7.38362	0.0285238	0.00368634	['BEX1', 'NTM', 'FAM189A2', 'GRIN2B', 'PTPRD', 'TRIM9', 'NFASC', 'SYT11', 'DPYSL5', 'ZMAT4', 'FEZ1', 'SCG5', 'LRRC3B', 'CSMD2', 'PCDHAC2', 'OPCML']	ARCHS4 (coexpressed genes)	upregulated
UNCX_human_tf_ARCHS4_coexpression	-1.45901	8.17502	0.0285238	0.00368634	['CRABP1', 'JPH4', 'NKAIN1', 'IGSF21', 'NFASC', 'PPP1R1A', 'FAM131C', 'DPYSL3', 'REEP2', 'CNTN2', 'ME3', 'NEFM', 'FEZF1', 'GAL3ST3', 'PRR36', 'RNF165']	ARCHS4 (coexpressed genes)	upregulated
SRY_human_tf_ARCHS4_coexpression	-1.44237	8.08177	0.0285238	0.00368634	['NLGN4Y', 'BTBD17', 'RPS4Y1', 'SOX21', 'C1DP1', 'EDNRB', 'COL2A1', 'SALL2', 'ZIC2', 'FRZB', 'TMSB15A', 'SMOC1', 'LHX5', 'RSPO1', 'FEZF1', 'HES5']	ARCHS4 (coexpressed genes)	upregulated
LHX1_human_tf_ARCHS4_coexpression	-1.3722	7.68859	0.0285238	0.00368634	['GDF1', 'HAPLN1', 'POU3F4', 'SHISA6', 'IGSF21', 'CYP26A1', 'ZNF80', 'DPYSL5', 'SLC22A17', 'DPYSL3', 'REEP2', 'LHX5', 'NEFM', 'CER1', 'ADAMTS7', 'RNF165']	ARCHS4 (coexpressed genes)	upregulated
EMX1_human_tf_ARCHS4_coexpression	-1.31433	7.36433	0.0285238	0.00368634	['CA11', 'SLC13A3', 'CTNND2', 'TMEM59L', 'B3GAT1', 'SOX21', 'PNMA6A', 'JPH4', 'IGSF21', 'NFASC', 'ADGRB2', 'SV2A', 'SLC22A17', 'FAM131B', 'TCEAL2', 'CTNNA2']	ARCHS4 (coexpressed genes)	upregulated
EOMES_human_tf_ARCHS4_coexpression	-1.4938	8.36996	0.0285238	0.00368634	['MAGEB17', 'PCDH20', 'P3H2', 'SOX11', 'NTS', 'HAPLN1', 'CYP26A1', 'CALCR', 'KCNT2', 'CCKBR', 'ZIC2', 'PPP1R1A', 'LHX5', 'FEZF1', 'CER1', 'RNF165']	ARCHS4 (coexpressed genes)	upregulated
SCRT2_human_tf_ARCHS4_coexpression	-1.46722	8.22102	0.0285238	0.00368634	['SEMA5B', 'TENM2', 'GRIK5', 'SOX11', 'PTPRD', 'JPH4', 'NKAIN1', 'NFASC', 'DPYSL5', 'IGLON5', 'ZMAT4', 'DPYSL3', 'REEP2', 'PTPN5', 'PRR36', 'RNF165']	ARCHS4 (coexpressed genes)	upregulated
TGIF1_human_tf_ARCHS4_coexpression	-1.29504	7.25625	0.0285238	0.00368634	['FZD7', 'KLHDC7A', 'ZIC5', 'DUSP6', 'SFRP2', 'HTR7', 'SALL2', 'ZIC2', 'PODXL', 'ADAMTS19', 'ID3', 'ROR1', 'LRRN1', 'SMPDL3B', 'CA14', 'VRTN']	ARCHS4 (coexpressed genes)	upregulated
HAND2_human_tf_ARCHS4_coexpression	-1.31296	7.35665	0.0285238	0.00368634	['DUSP4', 'FHOD3', 'FKBP10', 'NEBL', 'STAC', 'PLPPR5', 'ZBTB12', 'C14ORF132', 'MFAP4', 'IGFBPL1', 'MYL7', 'FAM84A', 'SLC27A6', 'EMILIN1', 'ALPK2', 'TGM2']	ARCHS4 (coexpressed genes)	upregulated
ZNF750_human_tf_ARCHS4_coexpression	-1.14345	6.4069	0.0285238	0.00368634	['SPRR3', 'CDSN', 'KRT5', 'CLDN1', 'CST6', 'XG', 'EPN3', 'ALDH3B2', 'C1ORF116', 'KRT17', 'GJB3', 'KRT14', 'HAS3', 'LY6D', 'PKP1', 'KRT6A']	ARCHS4 (coexpressed genes)	upregulated
IRF6_human_tf_ARCHS4_coexpression	-1.14901	6.43802	0.0285238	0.00368634	['SLC44A4', 'CDSN', 'KRT5', 'CLDN1', 'PTHLH', 'EPN3', 'C1ORF116', 'GJB3', 'FAM110C', 'KRT14', 'HAS3', 'LY6D', 'PKP1', 'ITGB6', 'PLCH2', 'KRT6A']	ARCHS4 (coexpressed genes)	upregulated
OVOL1_human_tf_ARCHS4_coexpression	-1.21145	6.78789	0.0285238	0.00368634	['CDSN', 'CLDN1', 'IL22RA1', 'EPN3', 'ALDH3B2', 'C1ORF116', 'CLDN3', 'KRT17', 'GJB3', 'KRT14', 'HAS3', 'LY6D', 'PKP1', 'VGLL1', 'PDZK1P1', 'KRT6A']	ARCHS4 (coexpressed genes)	upregulated
FOXN1_human_tf_ARCHS4_coexpression	-1.21942	6.83255	0.0285238	0.00368634	['CDSN', 'KRT34', 'KRT5', 'CLDN1', 'CST6', 'EPN3', 'ALDH3B2', 'C1ORF116', 'KRT17', 'GJB3', 'KRT14', 'LY6D', 'PKP1', 'S100A3', 'PLCH2', 'KRT6A']	ARCHS4 (coexpressed genes)	upregulated
LIN28B_human_tf_ARCHS4_coexpression	-1.23001	6.89187	0.0285238	0.00368634	['FOXD3', 'FBN3', 'RASL10B', 'FZD7', 'ZIC5', 'SFRP2', 'SALL2', 'ZIC2', 'PODXL', 'ADAMTS19', 'ROR1', 'LRRN1', 'HES3', 'FEZF1', 'VRTN', 'PHC1P1']	ARCHS4 (coexpressed genes)	upregulated
ZIC2_human_tf_ARCHS4_coexpression	-1.2322	6.90414	0.0285238	0.00368634	['CASC10', 'FZD7', 'SHISA2', 'ZIC5', 'RPS4Y1', 'GLI2', 'SYT6', 'SFRP2', 'SALL2', 'LIX1', 'ADAMTS19', 'COL4A6', 'ROR1', 'LRRN1', 'CA14', 'VRTN']	ARCHS4 (coexpressed genes)	upregulated
ZFP42_human_tf_ARCHS4_coexpression	-1.28428	7.19598	0.0285238	0.00368634	['FOXD3', 'FZD7', 'KLHDC7A', 'ZIC5', 'SYT6', 'SFRP2', 'HTR7', 'SALL2', 'ZIC2', 'PODXL', 'ADAMTS19', 'ROR1', 'LRRN1', 'SMPDL3B', 'VRTN', 'PHC1P1']	ARCHS4 (coexpressed genes)	upregulated
OSR2_human_tf_ARCHS4_coexpression	-1.23429	6.91586	0.0285238	0.00368634	['SEMA5A', 'MOXD1', 'FKBP10', 'PTGIS', 'LUM', 'THY1', 'CPZ', 'SOD3', 'DKK1', 'XG', 'MFAP4', 'SMOC2', 'SNAI2', 'EMILIN1', 'ALPK2', 'MFGE8']	ARCHS4 (coexpressed genes)	upregulated
ZNF334_human_tf_ARCHS4_coexpression	-1.234	6.91427	0.0285238	0.00368634	['NLGN3', 'NLGN4Y', 'PCYT1B', 'CASC10', 'BEX1', 'SOX11', 'RPS4Y1', 'JAKMIP2', 'TOX3', 'SALL2', 'ZIC2', 'TMSB15A', 'FEZ1', 'LRRN1', 'FEZF1', 'CA14']	ARCHS4 (coexpressed genes)	upregulated
MYCN_human_tf_ARCHS4_coexpression	-1.24701	6.98716	0.0285238	0.00368634	['STAC', 'FZD7', 'PLPPR5', 'RAX', 'ZDHHC22', 'TULP1', 'SOGA3', 'NKAIN1', 'LRFN2', 'SIX6', 'IGFBPL1', 'SALL2', 'ADAMTS19', 'FAM84A', 'LRRN1', 'VRTN']	ARCHS4 (coexpressed genes)	upregulated
ZNF362_human_tf_ARCHS4_coexpression	-1.25347	7.02335	0.0285238	0.00368634	['CADM3', 'RAMP2', 'PIANP', 'CTNND2', 'GRIK3', 'ZBTB12', 'PTPRD', 'ADGRB2', 'DPYSL5', 'SLC22A17', 'DPYSL3', 'RHBDL3', 'TP53I11', 'FBXL7', 'PRR36', 'ADAMTS7']	ARCHS4 (coexpressed genes)	upregulated
ARX_human_tf_ARCHS4_coexpression	-1.26355	7.07984	0.0285238	0.00368634	['NLGN4Y', 'BEX1', 'KCNA5', 'SOX11', 'SSTR3', 'POU3F4', 'JAKMIP2', 'MAPK10', 'TOX3', 'TCEAL7', 'DPYSL5', 'TMSB15A', 'SCG5', 'CNTN1', 'CNTN4', 'SLC38A4']	ARCHS4 (coexpressed genes)	upregulated
FAM171B_human_tf_ARCHS4_coexpression	-1.27017	7.1169	0.0285238	0.00368634	['SEMA5A', 'CTTNBP2', 'LMO3', 'PCDH20', 'PLPPR5', 'SOX11', 'PDYN', 'SEZ6L', 'JAKMIP2', 'PTPRD', 'TRIM9', 'KCNT2', 'PTPRZ1', 'SYT11', 'SCG5', 'CNTN1']	ARCHS4 (coexpressed genes)	upregulated
PHOX2A_human_tf_ARCHS4_coexpression	-1.27313	7.1335	0.0285238	0.00368634	['DUSP4', 'FAM57B', 'STAC', 'GRIK5', 'PLPPR5', 'CHRNA9', 'ZBTB12', 'C14ORF132', 'SOGA3', 'IGFBPL1', 'SYT11', 'SV2A', 'FAM84A', 'EMILIN1', 'RSPO4', 'PCDHAC2']	ARCHS4 (coexpressed genes)	upregulated
TERF1_human_tf_ARCHS4_coexpression	-1.27697	7.155	0.0285238	0.00368634	['FOXD3', 'GRID2', 'FZD7', 'KLHDC7A', 'ZIC5', 'SYT6', 'SFRP2', 'HTR7', 'SALL2', 'ZIC2', 'PODXL', 'ADAMTS19', 'ROR1', 'LRRN1', 'SMPDL3B', 'VRTN']	ARCHS4 (coexpressed genes)	upregulated
TSHZ3_human_tf_ARCHS4_coexpression	-1.24438	6.97242	0.0285238	0.00368634	['FKBP10', 'TAGLN', 'STAC', 'TMEM200A', 'NTM', 'SOX14', 'THY1', 'ADRA2A', 'MFAP4', 'NKAIN1', 'FAM84A', 'SPOCK1', 'SNAI2', 'EMILIN1', 'TGFBI', 'CSMD2']	ARCHS4 (coexpressed genes)	upregulated
ESR1_21235772_ChIP-Seq_MCF-7_Human	-2.92642	18.3803	0.0325491	0.00187183	['EDN1', 'SPRY4', 'GFRA1', 'C1ORF21', 'VTCN1', 'TM4SF1', 'SOX3', 'GNA14', 'CALCR', 'PODXL', 'SLCO2A1', 'TGFBI', 'FREM2', 'EPHA2']	ChEA (experimentally validated targets)	upregulated
HOXB6_human_tf_ARCHS4_coexpression	-1.49284	9.71831	0.034841	0.00148853	['HOXD13', 'HOXA13', 'HOXC11', 'FTH1P2', 'HOXC10', 'HOXA11', 'HOXA10', 'HOXA9', 'HOXB9', 'HOXD3', 'HOXC9', 'HOXD9', 'HOXB7', 'HOXD8', 'MNX1', 'HMX1', 'HOXA4']	ARCHS4 (coexpressed genes)	downregulated
SOHLH2_human_tf_ARCHS4_coexpression	-1.53569	9.99726	0.034841	0.00148853	['KHDC3L', 'NAA11', 'DCAF4L2', 'DDX43', 'DPPA3P2', 'OOEP', 'NLRP9', 'DPPA3', 'SPATA22', 'NLRP4', 'MAEL', 'NLRP2', 'RNF17', 'DPPA5', 'GTSF1', 'DSCR8', 'BRDT']	ARCHS4 (coexpressed genes)	downregulated
ZNF256_human_tf_ARCHS4_coexpression	-1.69218	11.016	0.034841	0.00148853	['TRIM60', 'KHDC3L', 'RP11-241F15.1', 'DPPA3P2', 'KLF17', 'FOXR1', 'TRIM75P', 'ARGFX', 'RP11-257K9.8', 'FAM151A', 'DPPA3', 'ZNF723P', 'ZFP42', 'ZNF735', 'AK4P3', 'BP-21264C1.1', 'BRDT']	ARCHS4 (coexpressed genes)	downregulated
HOXD8_human_tf_ARCHS4_coexpression	-1.45036	9.44182	0.034841	0.00148853	['SLC12A3', 'ANKRD26P1', 'HOXD13', 'PHKA1', 'HOXC11', 'HOXC10', 'HOXA11', 'HOXA10', 'HOXB9', 'FXYD4', 'MYH13', 'HOXD3', 'HOXA7', 'HOXC9', 'HOXB7', 'HOXA4', 'ATP6V1B1']	ARCHS4 (coexpressed genes)	downregulated
SMAD4_21741376_ChIP-Seq_HESCs_Human	-1.94882	11.6774	0.0422726	0.00249854	['BARHL1', 'SEMA5A', 'FHOD3', 'SEMA5B', 'FLT1', 'VIPR2', 'GRIK3', 'RAX', 'KLHDC7A', 'CPZ', 'GRPR', 'SOX21', 'CLDN1', 'CDH4', 'ZIC2', 'ME3', 'ITGB6', 'RSPO4', 'CER1', 'PCDHAC2', 'PKNOX2', 'IER3', 'DUSP4', 'SLC13A3', 'GRID2', 'EDN1', 'ST6GAL2', 'VSTM2L', 'SOX14', 'PDYN', 'SORCS3', 'DUSP6', 'SFRP2', 'CCKBR', 'NRG3', 'DOK5', 'SLCO2A1', 'PKP1', 'CDC42EP1', 'ROR1', 'ALPK2', 'TNIK', 'TLR5', 'FREM1', 'FR…	ChEA (experimentally validated targets)	upregulated

## Sheet: vs expanded hiPSC
term_name	zscore	combined_score	FDR	pvalue	overlapping_genes	gene_set_library	geneset
ESRRB_human_tf_ARCHS4_coexpression	-2.02809	540.544	2.05889e-113	1.77033e-116	['EIF2S2P3', 'RPLP0P6', 'ATP5G2P1', 'CTD-2122P11.1', 'RPL10L', 'ATP5BP1', 'ATP5A1P7', 'RP11-305L7.5', 'HSP90AB6P', 'RPS4XP21', 'RPS3AP22', 'KB-1205A7.1', 'RPS15AP9', 'RP11-214N15.5', 'RPS7P6', 'RPL17P20', 'RP11-481K9.4', 'RP6-218J18.2', 'RP11-166J22.1', 'RP4-570O12.2', 'CDV3P1', 'RPS4XP17', 'PIN4P1', 'RPL7P11', 'AC104076.2', 'RPL7AP66', 'RPS4XP6', 'RP5-837J1.1', 'NCLP2', 'UBBP4', 'AC006026.9', 'U…	ARCHS4 (coexpressed genes)	downregulated
ZNF625_human_tf_ARCHS4_coexpression	-2.09155	319.685	2.42246e-64	4.16588e-67	['MTND5P10', 'RP4-580O19.2', 'AC091654.7', 'ATP5G2P1', 'RPL10L', 'ATP5BP1', 'AF131215.1', 'CCT4P1', 'NPM1P8', 'ATP5A1P7', 'RPL34P33', 'RP11-305L7.5', 'RPS4XP21', 'RP11-538P18.1', 'RPS3AP22', 'KB-1205A7.1', 'RP11-307I14.2', 'CTD-2538A21.1', 'RPS15AP9', 'VDAC1P10', 'RP11-356M20.1', 'RPL17P20', 'AC092569.2', 'EEF1A1P12', 'RP11-481K9.4', 'VDAC1P2', 'RP6-218J18.2', 'CTD-2061E19.1', 'RP11-343B5.1', 'RP…	ARCHS4 (coexpressed genes)	downregulated
NKX6-3_human_tf_ARCHS4_coexpression	-1.8834	260.651	3.05389e-58	7.87763e-61	['RP4-580O19.2', 'ATP5G2P1', 'RPL10L', 'ATP5BP1', 'AF131215.1', 'CCT4P1', 'NPM1P8', 'RP11-305L7.5', 'RPS4XP21', 'RP11-109P14.8', 'EIF4A1P6', 'RP11-307I14.2', 'RPS15AP9', 'RPL7AP38', 'EEF1A1P12', 'RP11-481K9.4', 'VDAC1P2', 'CTD-2061E19.1', 'RP11-166J22.1', 'RP11-343B5.1', 'RP11-388B24.4', 'PKMP2', 'RPLP1P11', 'CDV3P1', 'AC104076.2', 'RPS4XP6', 'RP5-837J1.1', 'RP3-486I3.4', 'NCLP2', 'AC009502.1', '…	ARCHS4 (coexpressed genes)	downregulated
OVOL1_human_tf_ARCHS4_coexpression	-1.59789	96.374	4.66624e-24	6.40087e-27	['LAD1', 'KRT23', 'TRIM29', 'DUOXA1', 'CHP2', 'ANXA8', 'PLEKHN1', 'TNS4', 'KRT6A', 'SERPINB5', 'CLDN4', 'C1ORF116', 'CLDN3', 'ADGRF4', 'MALL', 'CLDN7', 'B3GNT3', 'LY6D', 'PKP1', 'IRF6', 'PKP3', 'VGLL1', 'COL17A1', 'TACSTD2', 'GATA3', 'CYP4F22', 'EVPL', 'SCEL', 'ALDH3B2', 'MAL2', 'MYH14', 'IL36RN', 'S100A14', 'AP1M2', 'ST14', 'CDSN', 'GALNT3', 'TMEM30B', 'EPHX3', 'A2ML1', 'KLK10', 'GRHL2', 'IL22RA…	ARCHS4 (coexpressed genes)	upregulated
IRF6_human_tf_ARCHS4_coexpression	-1.51891	91.6103	4.66624e-24	6.40087e-27	['LAD1', 'TINAGL1', 'ITGB4', 'KRT23', 'LAMC2', 'TRIM29', 'DUOXA1', 'ANXA8', 'ITGB6', 'TNS4', 'KRT6A', 'KRT5', 'OVOL1', 'SERPINB5', 'CLDN4', 'C1ORF116', 'ADGRF4', 'CLDN7', 'B3GNT3', 'LY6D', 'PKP1', 'PKP3', 'COL17A1', 'LAMA3', 'TACSTD2', 'KLK5', 'EVPL', 'NDRG1', 'PTHLH', 'SCEL', 'MAL2', 'MYH14', 'IL36RN', 'S100A14', 'TSPAN1', 'AP1M2', 'ST14', 'CDSN', 'LAMB3', 'GALNT3', 'TMEM30B', 'A2ML1', 'KLK10', …	ARCHS4 (coexpressed genes)	upregulated
DSP_human_tf_ARCHS4_coexpression	-1.59215	85.8953	1.80614e-21	3.71633e-24	['COL17A1', 'LAD1', 'ITGB4', 'LAMA3', 'TACSTD2', 'KLK5', 'KRT23', 'LAMC2', 'CYP4F22', 'EVPL', 'CST6', 'PTHLH', 'AADACL3', 'SCEL', 'ALDH3B2', 'TRIM29', 'DUOXA1', 'MAL2', 'ANXA8', 'IL36RN', 'ITGB6', 'S100A14', 'TNS4', 'KRT6A', 'TFAP2A', 'ST14', 'CDSN', 'LAMB3', 'GALNT3', 'TMEM30B', 'A2ML1', 'KRT5', 'OVOL1', 'GRHL2', 'SERPINB5', 'XG', 'GJB2', 'C1ORF116', 'KRT17', 'GJB3', 'KRT16', 'ADGRF4', 'KRT14', …	ARCHS4 (coexpressed genes)	upregulated
TP63_human_tf_ARCHS4_coexpression	-1.60691	80.0909	8.23818e-20	2.26013e-22	['COL17A1', 'LAD1', 'C5ORF46', 'TINAGL1', 'ITGB4', 'LAMA3', 'TACSTD2', 'LAMC2', 'EVPL', 'NDRG1', 'CST6', 'PTHLH', 'NIPAL4', 'AADACL3', 'SCEL', 'ALDH3B2', 'TRIM29', 'DUOXA1', 'ANXA8', 'IL36RN', 'ITGB6', 'S100A14', 'TNS4', 'KRT6A', 'TFAP2A', 'CDSN', 'LAMB3', 'GALNT3', 'A2ML1', 'KRT5', 'OVOL1', 'KLK10', 'GRHL2', 'SERPINB5', 'XG', 'GJB2', 'C1ORF116', 'KRT17', 'GJB3', 'KRT16', 'ADGRF4', 'KRT14', 'LY6D…	ARCHS4 (coexpressed genes)	upregulated
GRHL3_human_tf_ARCHS4_coexpression	-1.55183	71.1444	2.23998e-18	1.22907e-20	['COL17A1', 'LAD1', 'SPRR3', 'TACSTD2', 'KRT23', 'BICDL2', 'CYP4F22', 'EVPL', 'NDRG1', 'SCEL', 'ALDH3B2', 'TRIM29', 'DUOXA1', 'MAL2', 'ANXA8', 'IL36RN', 'S100A14', 'PLEKHN1', 'TNS4', 'KRT6A', 'ST14', 'CDSN', 'EPHX3', 'A2ML1', 'KRT5', 'OVOL1', 'KLK10', 'GRHL2', 'SERPINB5', 'CLDN4', 'GJB2', 'C1ORF116', 'KRT17', 'GJB3', 'KRT16', 'SCNN1B', 'ADGRF4', 'KRT14', 'LY6D', 'PKP1', 'IRF6', 'PKP3', 'CRB3']	ARCHS4 (coexpressed genes)	upregulated
PPP1R13L_human_tf_ARCHS4_coexpression	-1.64383	75.3619	2.23998e-18	1.22907e-20	['COL17A1', 'LAD1', 'TINAGL1', 'ITGB4', 'LAMA3', 'TACSTD2', 'LAMC2', 'BICDL2', 'CYP4F22', 'EVPL', 'CST6', 'SCEL', 'ALDH3B2', 'DUOXA1', 'MYH14', 'ANXA8', 'S100A14', 'PLEKHN1', 'TNS4', 'KRT6A', 'TFAP2A', 'ST14', 'CDSN', 'LAMB3', 'KRT7', 'A2ML1', 'KRT5', 'OVOL1', 'KLK10', 'GRHL2', 'SERPINB5', 'CLDN4', 'GJB2', 'C1ORF116', 'KRT17', 'GJB3', 'KRT16', 'ADGRF4', 'KRT14', 'LY6D', 'PKP1', 'IRF6', 'PKP3']	ARCHS4 (coexpressed genes)	upregulated
KLF5_human_tf_ARCHS4_coexpression	-1.58286	72.5668	2.23998e-18	1.22907e-20	['COL17A1', 'LAD1', 'FCGBP', 'TINAGL1', 'ITGB4', 'IHH', 'TACSTD2', 'EVPL', 'SCEL', 'TMEM125', 'TRIM29', 'DUOXA1', 'AGR2', 'CHP2', 'MAL2', 'MYH14', 'AGR3', 'ANXA8', 'S100A14', 'VILL', 'TSPAN1', 'CCL25', 'ST14', 'GALNT3', 'TMEM30B', 'ANO9', 'OVOL1', 'SERPINB5', 'IL22RA1', 'CLDN4', 'GJB2', 'C1ORF116', 'CLDN3', 'GJB3', 'CDC42EP5', 'ADGRF4', 'CLDN7', 'B3GNT3', 'LY6D', 'PKP1', 'IRF6', 'PKP3', 'TJP3']	ARCHS4 (coexpressed genes)	upregulated
EHF_human_tf_ARCHS4_coexpression	-1.52875	70.0864	2.23998e-18	1.22907e-20	['LAD1', 'TACSTD2', 'KRT23', 'TMPRSS2', 'BICDL2', 'EVPL', 'NDRG1', 'SCEL', 'ALDH3B2', 'TMEM125', 'TRIM29', 'DUOXA1', 'AGR2', 'MAP7', 'MAL2', 'MYH14', 'ANXA8', 'IL36RN', 'S100A14', 'TSPAN1', 'AP1M2', 'KRT6A', 'ST14', 'GALNT3', 'TMEM30B', 'A2ML1', 'KLK10', 'GRHL2', 'SERPINB5', 'CLDN4', 'GJB2', 'CLDN3', 'GJB3', 'SCNN1B', 'ADGRF4', 'CLDN7', 'B3GNT3', 'LY6D', 'PKP1', 'IRF6', 'PKP3', 'TJP3', 'CRB3']	ARCHS4 (coexpressed genes)	upregulated
BARX2_human_tf_ARCHS4_coexpression	-1.58441	66.4897	9.64548e-17	5.954e-19	['LAD1', 'SPRR3', 'ARHGAP8', 'TACSTD2', 'BICDL2', 'CYP4F22', 'EVPL', 'CST6', 'LAMP5', 'SCEL', 'ALDH3B2', 'TRIM29', 'DUOXA1', 'MAL2', 'MYH14', 'IL36RN', 'S100A14', 'PLEKHN1', 'ST14', 'CDSN', 'TMEM30B', 'A2ML1', 'OVOL1', 'KLK10', 'GRHL2', 'TM4SF1', 'IL22RA1', 'SCNN1G', 'CLDN4', 'GJB2', 'C1ORF116', 'GJB3', 'SCNN1B', 'CLDN7', 'KRT14', 'B3GNT3', 'LY6D', 'PKP1', 'IRF6', 'PKP3', 'TJP3']	ARCHS4 (coexpressed genes)	upregulated
ZNF750_human_tf_ARCHS4_coexpression	-1.54155	61.7691	5.25301e-16	3.96318e-18	['COL17A1', 'LAD1', 'SPRR3', 'C5ORF46', 'TACSTD2', 'KRT23', 'CYP4F22', 'EVPL', 'CST6', 'AADACL3', 'SCEL', 'ALDH3B2', 'TRIM29', 'DUOXA1', 'ANXA8', 'IL36RN', 'S100A14', 'PLEKHN1', 'TNS4', 'KRT6A', 'CDSN', 'EPHX3', 'A2ML1', 'KRT5', 'OVOL1', 'KLK10', 'GRHL2', 'SERPINB5', 'XG', 'GJB2', 'C1ORF116', 'KRT17', 'GJB3', 'KRT16', 'ADGRF4', 'KRT14', 'LY6D', 'PKP1', 'IRF6', 'PKP3']	ARCHS4 (coexpressed genes)	upregulated
MST1R_human_tf_ARCHS4_coexpression	-1.56392	62.6656	5.25301e-16	3.96318e-18	['COL17A1', 'TOR4A', 'LAD1', 'FCGBP', 'TINAGL1', 'TNFRSF6B', 'ITGB4', 'IHH', 'TACSTD2', 'TMPRSS2', 'BICDL2', 'MSLN', 'EVPL', 'TRIM29', 'CA4', 'AGR2', 'CHP2', 'MAL2', 'MYH14', 'ANXA8', 'PLEKHN1', 'VILL', 'TNS4', 'TSPAN1', 'ST14', 'LAMB3', 'GALNT3', 'KRT7', 'ANO9', 'IL22RA1', 'CLDN4', 'C1ORF116', 'CLDN3', 'GJB3', 'CDC42EP5', 'MALL', 'CLDN7', 'IRF6', 'PKP3', 'TJP3']	ARCHS4 (coexpressed genes)	upregulated
HIF3A_human_tf_ARCHS4_coexpression	-1.9222	73.4364	7.43977e-15	2.55882e-17	['EEF1A1P7', 'HEPACAM', 'RP11-217O12.1', 'RP11-147K6.2', 'LDHAP7', 'EIF4A1P10', 'TNFSF13B', 'EIF1P4', 'POTEKP', 'GAPDHP29', 'RP3-406A7.3', 'MYL6P2', 'RP11-64K7.1', 'EEF1A1P38', 'EEF1A1P17', 'RP11-804H8.5', 'SPANXB1', 'SPANXC', 'UQCRFS1P1', 'AC125238.2', 'PPIAP22', 'RP4-570O12.2', 'RPS4XP19', 'RP11-697N18.1', 'H3F3C', 'FTH1P5', 'RP11-641C17.1', 'RP11-344H11.5', 'CTC-512J14.7', 'ACTBL2', 'UBBP3', '…	ARCHS4 (coexpressed genes)	downregulated
DLX3_human_tf_ARCHS4_coexpression	-1.61232	55.7346	1.17997e-13	9.71169e-16	['COL17A1', 'LAD1', 'CLIC3', 'TINAGL1', 'TACSTD2', 'GATA3', 'VTCN1', 'CYP4F22', 'EVPL', 'CST6', 'ALDH3B2', 'TRIM29', 'NLRP2', 'MAL2', 'ANXA8', 'AP1M2', 'RBBP8NL', 'TFAP2A', 'ST14', 'CDSN', 'GALNT3', 'KRT34', 'OVOL1', 'KLK10', 'GRHL2', 'SERPINB5', 'XG', 'CLDN4', 'CLDN3', 'GJB3', 'ADGRF4', 'KRT14', 'LY6D', 'PKP1', 'PKP3', 'XAGE2', 'CRB3']	ARCHS4 (coexpressed genes)	upregulated
GRHL1_human_tf_ARCHS4_coexpression	-1.6502	54.1233	5.93798e-13	5.70176e-15	['LAD1', 'SPRR3', 'TACSTD2', 'KLK5', 'KRT23', 'CYP4F22', 'EVPL', 'CST6', 'AADACL3', 'SCEL', 'ALDH3B2', 'FAM83F', 'TRIM29', 'DUOXA1', 'MAL2', 'ANXA8', 'IL36RN', 'S100A14', 'KRT6A', 'CDSN', 'A2ML1', 'OVOL1', 'KLK10', 'GRHL2', 'SERPINB5', 'GJB2', 'C1ORF116', 'GJB3', 'KRT16', 'ADGRF4', 'KRT14', 'LY6D', 'PKP1', 'IRF6', 'PKP3', 'DDX11L2']	ARCHS4 (coexpressed genes)	upregulated
ARNTL2_human_tf_ARCHS4_coexpression	-1.56915	51.4649	5.93798e-13	5.70176e-15	['COL17A1', 'LAD1', 'TINAGL1', 'ITGB4', 'LAMA3', 'TACSTD2', 'LAMC2', 'PTHLH', 'SCEL', 'HRH1', 'NT5E', 'TRIM29', 'PLAU', 'MAL2', 'ANXA8', 'IL36RN', 'S100A14', 'PLEKHN1', 'TNS4', 'KRT6A', 'MB21D1', 'LAMB3', 'GALNT3', 'KRT7', 'A2ML1', 'KRT5', 'KLK10', 'SERPINB5', 'GJB2', 'KRT17', 'GJB3', 'ADGRF4', 'KRT14', 'PKP1', 'IRF6', 'PKP3']	ARCHS4 (coexpressed genes)	upregulated
ELF3_human_tf_ARCHS4_coexpression	-1.66058	51.5792	2.7778e-12	3.23887e-14	['LAD1', 'FCGBP', 'C2ORF40', 'IHH', 'TACSTD2', 'TMPRSS2', 'BICDL2', 'WFDC2', 'TMEM125', 'AGR2', 'CHP2', 'MAL2', 'MYH14', 'AGR3', 'VILL', 'CYP2F1', 'TSPAN1', 'AP1M2', 'ST14', 'GALNT3', 'TMEM30B', 'FOXJ1', 'IL22RA1', 'CLDN4', 'MLPH', 'CLDN3', 'CDC42EP5', 'SCNN1B', 'MALL', 'CLDN7', 'B3GNT3', 'IRF6', 'PKP3', 'SPATA18', 'CRB3']	ARCHS4 (coexpressed genes)	upregulated
PLEK2_human_tf_ARCHS4_coexpression	-1.59487	49.5383	2.7778e-12	3.23887e-14	['COL17A1', 'LAD1', 'TINAGL1', 'TNFRSF6B', 'ITGB4', 'LAMA3', 'LAMC2', 'PTHLH', 'HRH1', 'NT5E', 'PLAU', 'ANXA8', 'PLEKHN1', 'MICALCL', 'C19ORF33', 'TNS4', 'KRT6A', 'LAMB3', 'GALNT3', 'KRT7', 'KRT5', 'SERPINB5', 'CLDN4', 'GJB2', 'ASTL', 'KRT17', 'SLCO4A1', 'GJB3', 'ADGRF4', 'CLDN7', 'KRT14', 'B3GNT3', 'IRF6', 'OCIAD2', 'PKP3']	ARCHS4 (coexpressed genes)	upregulated
FOXN1_human_tf_ARCHS4_coexpression	-1.55726	48.37	2.7778e-12	3.23887e-14	['COL17A1', 'LAD1', 'TACSTD2', 'CYP4F22', 'EVPL', 'CST6', 'SCEL', 'ALDH3B2', 'TRIM29', 'DUOXA1', 'ANXA8', 'IL36RN', 'S100A14', 'PLEKHN1', 'TNS4', 'KRT6A', 'CDSN', 'KRT34', 'EPHX3', 'A2ML1', 'KRT5', 'OVOL1', 'KLK10', 'SERPINB5', 'GJB2', 'C1ORF116', 'KRT17', 'GJB3', 'KRT16', 'ADGRF4', 'KRT14', 'LY6D', 'PKP1', 'IRF6', 'PKP3']	ARCHS4 (coexpressed genes)	upregulated
GRHL2_human_tf_ARCHS4_coexpression	-1.54015	45.2152	1.36503e-11	1.77884e-13	['LAD1', 'ARHGAP8', 'TACSTD2', 'TMPRSS2', 'BICDL2', 'GATA3', 'VTCN1', 'EVPL', 'ALDH3B2', 'FAM83F', 'TMEM125', 'TRIM29', 'AGR2', 'MAP7', 'MAL2', 'MYH14', 'AGR3', 'SPTSSB', 'AP1M2', 'TFAP2A', 'ST14', 'GALNT3', 'TMEM30B', 'OVOL1', 'CLDN4', 'C1ORF116', 'MLPH', 'CLDN3', 'ADGRF4', 'CLDN7', 'B3GNT3', 'IRF6', 'PKP3', 'TJP3']	ARCHS4 (coexpressed genes)	upregulated
BNC1_human_tf_ARCHS4_coexpression	-1.59635	46.8652	1.36503e-11	1.77884e-13	['PIWIL2', 'COL17A1', 'LAD1', 'TINAGL1', 'ITGB4', 'LAMA3', 'TACSTD2', 'LAMC2', 'PTHLH', 'TRIM29', 'ANXA8', 'ITGB6', 'S100A14', 'MICALCL', 'TNS4', 'KRT6A', 'LAMB3', 'GALNT3', 'FN1', 'KRT7', 'KRT5', 'SERPINB5', 'EPGN', 'GJB2', 'C1ORF116', 'KRT17', 'GJB3', 'KRT16', 'ADGRF4', 'KRT14', 'PKP1', 'IRF6', 'PKP3', 'KANK4']	ARCHS4 (coexpressed genes)	upregulated
SP6_human_tf_ARCHS4_coexpression	-1.58	43.7484	6.55317e-11	9.43872e-13	['LAD1', 'TINAGL1', 'ITGB4', 'CGB8', 'TACSTD2', 'KRT23', 'VTCN1', 'EVPL', 'ALDH3B2', 'TRIM29', 'NLRP2', 'MAL2', 'MYH14', 'ANXA8', 'PLEKHN1', 'AP1M2', 'RBBP8NL', 'ST14', 'KRT7', 'ANO9', 'OVOL1', 'GRHL2', 'CLDN4', 'GJB3', 'ADGRF4', 'CLDN7', 'IRF6', 'PKP3', 'VGLL1', 'XAGE2', 'KANK4', 'TJP3', 'CRB3']	ARCHS4 (coexpressed genes)	upregulated
OVOL2_human_tf_ARCHS4_coexpression	-1.69415	46.9091	6.55317e-11	9.43872e-13	['LAD1', 'SPON2', 'ARHGAP8', 'IHH', 'TACSTD2', 'RPS4Y1', 'TMEM125', 'MAP7', 'MAL2', 'MYH14', 'S100A14', 'TSPAN1', 'AP1M2', 'RBBP8NL', 'ST14', 'GALNT3', 'TMEM30B', 'EPHX3', 'GRHL2', 'CLDN4', 'C1ORF116', 'MLPH', 'CLDN3', 'DPPA3', 'CLDN7', 'B3GNT3', 'CTAGE8', 'IRF6', 'PKP3', 'DPPA5', 'VGLL1', 'TJP3', 'CRB3']	ARCHS4 (coexpressed genes)	upregulated
ZBTB7C_human_tf_ARCHS4_coexpression	-1.61559	42.0946	3.06482e-10	4.83476e-12	['LAD1', 'FCGBP', 'C2ORF40', 'TACSTD2', 'BICDL2', 'EVPL', 'CST6', 'WFDC2', 'ALDH3B2', 'BEST4', 'TMEM125', 'KIF19', 'TRIM29', 'DUOXA1', 'AGR2', 'CHP2', 'MYH14', 'AGR3', 'VILL', 'CYP2F1', 'ST14', 'FOXJ1', 'CLDN4', 'CLDN3', 'SCNN1B', 'CLDN7', 'B3GNT3', 'LY6D', 'IRF6', 'PKP3', 'SPATA18', 'TJP3']	ARCHS4 (coexpressed genes)	upregulated
SPDEF_human_tf_ARCHS4_coexpression	-1.55934	40.6289	3.06482e-10	4.83476e-12	['SPON2', 'ARHGAP8', 'IDUA', 'TACSTD2', 'TMPRSS2', 'BICDL2', 'GATA3', 'EVPL', 'NDRG1', 'WFDC2', 'ALDH3B2', 'TMEM125', 'AGR2', 'MAL2', 'MYH14', 'AGR3', 'SPTSSB', 'TSPAN1', 'AP1M2', 'RBBP8NL', 'ST14', 'SRMS', 'GALNT3', 'TMEM30B', 'GRHL2', 'CLDN4', 'C1ORF116', 'MLPH', 'CLDN3', 'CLDN7', 'PKP3', 'TJP3']	ARCHS4 (coexpressed genes)	upregulated
ZBED2_human_tf_ARCHS4_coexpression	-1.66029	40.607	1.33949e-09	2.38866e-11	['COL17A1', 'SATB1', 'LAMA3', 'LAMC2', 'HAPLN3', 'PWP2', 'MSLN', 'PTHLH', 'SCEL', 'HENMT1', 'TRBC2', 'ANXA8', 'GBP2', 'TNS4', 'KRT6A', 'LAMB3', 'TAP2', 'A2ML1', 'KRT5', 'SERPINB5', 'PSMB8', 'GJB2', 'KRT17', 'CD8B', 'GJB3', 'ADGRF4', 'KRT14', 'IRF6', 'PKP3', 'LCP1', 'DOCK2']	ARCHS4 (coexpressed genes)	upregulated
TFCP2L1_human_tf_ARCHS4_coexpression	-1.61002	39.3775	1.33949e-09	2.38866e-11	['LAD1', 'FCGBP', 'TACSTD2', 'TMPRSS2', 'FAM83F', 'TRIM29', 'CA4', 'MYH14', 'S100A14', 'TNS4', 'TSPAN1', 'AP1M2', 'ST14', 'GALNT3', 'TMEM30B', 'MUC16', 'KRT5', 'GRHL2', 'SERPINB5', 'SCNN1G', 'CLDN4', 'C1ORF116', 'CLDN3', 'SCNN1B', 'CLDN7', 'B3GNT3', 'RGL3', 'IRF6', 'PKP3', 'TJP3', 'CRB3']	ARCHS4 (coexpressed genes)	upregulated
PAX9_human_tf_ARCHS4_coexpression	-1.59228	38.9435	1.33949e-09	2.38866e-11	['LAD1', 'SPRR3', 'C2ORF40', 'TACSTD2', 'BICDL2', 'EVPL', 'WFDC2', 'SCEL', 'TRIM29', 'DUOXA1', 'MAL2', 'MYH14', 'ANXA8', 'S100A14', 'PLEKHN1', 'CYP2F1', 'TSPAN1', 'FOXJ1', 'A2ML1', 'KLK10', 'GRHL2', 'GJB2', 'C1ORF116', 'SCNN1B', 'B3GNT3', 'LY6D', 'PKP1', 'IRF6', 'PKP3', 'SPATA18', 'TJP3']	ARCHS4 (coexpressed genes)	upregulated
FOXI1_human_tf_ARCHS4_coexpression	-1.57541	36.0726	6.14128e-09	1.13727e-10	['LAD1', 'RAMP3', 'IDUA', 'TACSTD2', 'KRT23', 'GATA3', 'VTCN1', 'EVPL', 'ALDH3B2', 'TMEM125', 'AGR2', 'S100A14', 'PLEKHN1', 'AP1M2', 'ST14', 'IFITM10', 'AP003419.11', 'SCNN1G', 'AZGP1', 'MLPH', 'CLDN3', 'SCNN1B', 'CLDN7', 'PPP1R1B', 'RGL3', 'RAB17', 'PKP3', 'VGLL1', 'TJP3', 'CRB3']	ARCHS4 (coexpressed genes)	upregulated
FOXA1_human_tf_ARCHS4_coexpression	-1.54804	33.0888	2.71452e-08	5.21307e-10	['SPON2', 'IHH', 'TACSTD2', 'TMPRSS2', 'GATA3', 'EVPL', 'NDRG1', 'ALDH3B2', 'TMEM125', 'NETO1', 'AGR2', 'MAL2', 'SPTSSB', 'TSPAN1', 'AP1M2', 'RBBP8NL', 'ST14', 'SRMS', 'GALNT3', 'TMEM30B', 'FOXJ1', 'OVOL1', 'GRHL2', 'CLDN4', 'C1ORF116', 'MLPH', 'CLDN3', 'PKP3', 'TJP3']	ARCHS4 (coexpressed genes)	upregulated
XBP1_human_tf_ARCHS4_coexpression	-1.49336	29.7046	1.11696e-07	2.29827e-09	['TACSTD2', 'BICDL2', 'GATA3', 'ALDH3B2', 'DPP7', 'TMEM125', 'AGR2', 'MAL2', 'MYH14', 'AGR3', 'SPTSSB', 'TSPAN1', 'AP1M2', 'ST14', 'GALNT3', 'TMEM30B', 'OVOL1', 'GRHL2', 'BSPRY', 'CLDN4', 'AZGP1', 'MLPH', 'CLDN3', 'CLDN7', 'PKP3', 'SLC27A2', 'TJP3', 'IGKV3-20']	ARCHS4 (coexpressed genes)	upregulated
TFAP2A_human_tf_ARCHS4_coexpression	-1.56545	31.1386	1.11696e-07	2.29827e-09	['COL17A1', 'C5ORF46', 'ARHGAP8', 'TYRP1', 'TACSTD2', 'GATA3', 'VTCN1', 'EVPL', 'ALDH3B2', 'TRIM29', 'MAL2', 'ANXA8', 'S100A14', 'TNS4', 'LAMB3', 'TMEM30B', 'GRHL2', 'SERPINB5', 'XG', 'GPR143', 'GJB2', 'MLPH', 'KRT17', 'GJB3', 'ADGRF4', 'PKP1', 'IRF6', 'PKP3']	ARCHS4 (coexpressed genes)	upregulated
TFAP2C_human_tf_ARCHS4_coexpression	-1.47984	27.2994	4.57844e-07	9.73467e-09	['GRB7', 'C5ORF46', 'ARHGAP8', 'TACSTD2', 'GATA3', 'VTCN1', 'ALDH3B2', 'NLRP2', 'MAL2', 'SPTSSB', 'AP1M2', 'RBBP8NL', 'TFAP2A', 'OVOL1', 'GRHL2', 'SERPINB5', 'OVOL2', 'XG', 'CLDN4', 'MLPH', 'DPPA3', 'PPP1R1B', 'PKP3', 'CCDC152', 'VGLL1', 'XAGE2', 'TSPYL5']	ARCHS4 (coexpressed genes)	upregulated
FOXQ1_human_tf_ARCHS4_coexpression	-1.584	26.9996	1.74824e-06	3.95692e-08	['TOR4A', 'LAD1', 'TINAGL1', 'ITGB4', 'TACSTD2', 'GRPR', 'SLC17A9', 'TRIM29', 'DACT2', 'MAL2', 'MYH14', 'A2M', 'TNS4', 'ST14', 'LAMB3', 'OVOL1', 'KLK10', 'SERPINB5', 'IL22RA1', 'CYP26A1', 'GJB3', 'ADGRF4', 'B3GNT3', 'RAB17', 'PKP3', 'CRB3']	ARCHS4 (coexpressed genes)	upregulated
KRTAP5-1_human_tf_ARCHS4_coexpression	-1.57249	26.8034	1.74824e-06	3.95692e-08	['LAD1', 'IDUA', 'BICDL2', 'GATA3', 'CYP4F22', 'EVPL', 'CST6', 'AADACL3', 'ALDH3B2', 'TRIM29', 'MYH14', 'PLEKHN1', 'KRTAP2-3', 'IFITM10', 'CDSN', 'CNTD2', 'ANO9', 'KRT34', 'EPHX3', 'GJB2', 'MLPH', 'KRT14', 'LY6D', 'PKP1', 'RGL3', 'PKP3']	ARCHS4 (coexpressed genes)	upregulated
SUZ12_NT2-D1_hg19	-1.81154	35.3634	2.68487e-06	3.32698e-09	['BARHL1', 'PTPRT', 'HPSE2', 'TMEM59L', 'IHH', 'ADCY8', 'PTHLH', 'LAMP5', 'NHLH2', 'CYP26B1', 'SIX6', 'HHEX', 'SIX3', 'OTX2', 'NPTX1', 'OTX1', 'FEZF2', 'WNT1', 'FEZF1', 'SH3GL2', 'ANKRD34B', 'TFAP2A', 'FOXD3', 'SLC30A3', 'EGR4', 'WNT7B', 'LMO3', 'FOXJ1', 'OVOL2', 'NELL1', 'ACTA1', 'ADCYAP1', 'CYP26A1', 'MLPH', 'CYP24A1', 'SLCO4A1', 'LHX5', 'LRRC3B', 'HMX2', 'VSX2']	ENCODE (experimentally validated targets)	upregulated
CASZ1_human_tf_ARCHS4_coexpression	-1.58161	24.8079	6.2436e-06	1.54163e-07	['LAD1', 'SPON2', 'TACSTD2', 'TMPRSS2', 'BICDL2', 'EVPL', 'ALDH3B2', 'TMEM125', 'TRIM29', 'AGR2', 'MYH14', 'AGR3', 'TSPAN1', 'RBBP8NL', 'ST14', 'GALNT3', 'FOXJ1', 'GRHL2', 'CLDN4', 'C1ORF116', 'MLPH', 'CLDN3', 'IRF6', 'PKP3', 'TJP3']	ARCHS4 (coexpressed genes)	upregulated
VDR_human_tf_ARCHS4_coexpression	-1.55542	24.3972	6.2436e-06	1.54163e-07	['TOR4A', 'LAD1', 'FCGBP', 'IHH', 'SECTM1', 'SLAMF8', 'AGR2', 'CHP2', 'MYH14', 'VILL', 'SLC15A3', 'CCL25', 'ST14', 'GALNT3', 'ANO9', 'NAALADL1', 'IL22RA1', 'C15ORF48', 'CLDN4', 'CLDN3', 'CDC42EP5', 'CLDN7', 'B3GNT3', 'PKP3', 'TJP3']	ARCHS4 (coexpressed genes)	upregulated
CDX1_human_tf_ARCHS4_coexpression	-1.54038	24.1613	6.2436e-06	1.54163e-07	['FCGBP', 'NR1I2', 'IHH', 'TMPRSS2', 'IGKC', 'CA4', 'AGR2', 'CHP2', 'MYH14', 'VILL', 'CCL25', 'ST14', 'MYO7B', 'ANO9', 'OVOL1', 'NAALADL1', 'IL22RA1', 'CLDN4', 'CLDN3', 'CDC42EP5', 'MALL', 'CLDN7', 'B3GNT3', 'TJP3', 'IGKV3-20']	ARCHS4 (coexpressed genes)	upregulated
SUZ12_20075857_ChIP-Seq_MESCs_Mouse	-0.935184	16.1828	1.92979e-05	3.05346e-08	['VIPR2', 'HPSE2', 'SCT', 'IHH', 'RAX', 'BEST2', 'TNF', 'NIPAL4', 'GPR176', 'TRIM29', 'PLAU', 'DUOXA1', 'HES7', 'CADPS2', 'SLC30A3', 'UNC5A', 'EPHA8', 'MATK', 'TAP2', 'KRT7', 'SHISA2', 'OVOL1', 'OVOL2', 'POU3F4', 'SHISA6', 'SCNN1G', 'ADCYAP1', 'CLDN3', 'ASTL', 'PPP1R3C', 'CRISPLD2', 'SCNN1B', 'CLDN7', 'PKP1', 'SPATA18', 'LY6H', 'SLC27A2', 'KANK4', 'TSPYL5', 'SHC2', 'KLHL14', 'TMEM59L', 'SLC1A1', …	ChEA (experimentally validated targets)	upregulated
SOX15_human_tf_ARCHS4_coexpression	-1.75321	25.1918	1.99586e-05	5.74938e-07	['COL17A1', 'LAD1', 'LAMB3', 'EPHX3', 'LAMC2', 'KRT5', 'SERPINB5', 'PTHLH', 'OVOL2', 'GJB2', 'KRT17', 'GJB3', 'DPPA3', 'TRIM29', 'ADGRF4', 'KRT14', 'NLRP2', 'PKP1', 'ANXA8', 'IRF6', 'PKP3', 'DPPA5', 'TNS4', 'KRT6A']	ARCHS4 (coexpressed genes)	upregulated
OTOP3_human_tf_ARCHS4_coexpression	-1.69284	24.3244	1.99586e-05	5.74938e-07	['LAD1', 'ST14', 'IHH', 'TMPRSS2', 'A2ML1', 'OVOL1', 'EVPL', 'SCEL', 'CLDN4', 'C1ORF116', 'CD8B', 'TRIM29', 'DUOXA1', 'MALL', 'CLDN7', 'B3GNT3', 'LY6D', 'PKP1', 'IL36RN', 'S100A14', 'PLEKHN1', 'PKP3', 'VILL', 'TJP3']	ARCHS4 (coexpressed genes)	upregulated
ATOH1_human_tf_ARCHS4_coexpression	-1.54846	22.2498	1.99586e-05	5.74938e-07	['CCL25', 'FCGBP', 'ST14', 'NR1I2', 'SLC1A1', 'IHH', 'MYO7B', 'ANO9', 'TMPRSS2', 'NAALADL1', 'IL22RA1', 'CLDN3', 'CDC42EP5', 'NNAT', 'CLDN7', 'CA4', 'B3GNT3', 'AGR2', 'CHP2', 'MYH14', 'AGR3', 'VILL', 'C19ORF33', 'TJP3']	ARCHS4 (coexpressed genes)	upregulated
TBX10_human_tf_ARCHS4_coexpression	-1.52777	21.9525	1.99586e-05	5.74938e-07	['CCL25', 'FCGBP', 'SMIM24', 'ST14', 'NR1I2', 'IHH', 'MYO7B', 'ANO9', 'NAALADL1', 'IL22RA1', 'SCNN1G', 'CLDN4', 'CLDN3', 'IGKC', 'CDC42EP5', 'CLDN7', 'B3GNT3', 'AGR2', 'BLNK', 'CHP2', 'MYH14', 'AGR3', 'VILL', 'TJP3']	ARCHS4 (coexpressed genes)	upregulated
RARG_human_tf_ARCHS4_coexpression	-1.50974	21.6935	1.99586e-05	5.74938e-07	['COL17A1', 'LAD1', 'CDSN', 'TACSTD2', 'KRT5', 'CYP4F22', 'EVPL', 'SERPINB5', 'XG', 'ALDH3B2', 'GJB2', 'KRT17', 'GJB3', 'TRIM29', 'ADGRF4', 'KRT14', 'LY6D', 'MAL2', 'PKP1', 'ANXA8', 'IRF6', 'PLEKHN1', 'PKP3', 'TNS4']	ARCHS4 (coexpressed genes)	upregulated
ISX_human_tf_ARCHS4_coexpression	-1.46261	21.0163	1.99586e-05	5.74938e-07	['CCL25', 'FCGBP', 'ST14', 'NR1I2', 'SLC1A1', 'IHH', 'MYO7B', 'ANO9', 'TMPRSS2', 'NAALADL1', 'IL22RA1', 'CLDN4', 'CLDN3', 'CDC42EP5', 'MALL', 'CLDN7', 'CA4', 'B3GNT3', 'AGR2', 'CHP2', 'MYH14', 'AGR3', 'VILL', 'TJP3']	ARCHS4 (coexpressed genes)	upregulated
CDX2_human_tf_ARCHS4_coexpression	-1.46817	19.2299	6.79171e-05	2.04962e-06	['CCL25', 'LAD1', 'FCGBP', 'ST14', 'NR1I2', 'SLC1A1', 'IHH', 'MYO7B', 'ANO9', 'TMPRSS2', 'NAALADL1', 'IL22RA1', 'CLDN4', 'CLDN3', 'CDC42EP5', 'CLDN7', 'CA4', 'B3GNT3', 'AGR2', 'CHP2', 'MYH14', 'VILL', 'TJP3']	ARCHS4 (coexpressed genes)	upregulated
HNF4G_human_tf_ARCHS4_coexpression	-1.48351	19.4308	6.79171e-05	2.04962e-06	['CCL25', 'FCGBP', 'CBR1', 'SMIM24', 'ST14', 'GALNT3', 'NR1I2', 'SLC1A1', 'IHH', 'MYO7B', 'ANO9', 'NAALADL1', 'IL22RA1', 'CDC42EP5', 'MALL', 'CLDN7', 'B3GNT3', 'AGR2', 'CHP2', 'MYH14', 'AGR3', 'VILL', 'TJP3']	ARCHS4 (coexpressed genes)	upregulated
TP53_20018659_ChIP-ChIP_R1E_Mouse	-2.20191	31.3883	0.000194939	6.44342e-07	['SPON2', 'ITGB4', 'IHH', 'RAX', 'CPZ', 'PWP2', 'SIX6', 'SIX3', 'ANXA8', 'FEZF2', 'HES7', 'FOXD3', 'DUSP2', 'SLC30A3', 'KRT5', 'OVOL1', 'SORCS3', 'ADRA2A', 'OVOL2', 'CLDN4', 'ZFP41', 'ASTL', 'PPP1R3C', 'PKP1', 'SATB1', 'TMEM59L', 'WNT8B', 'GATA3', 'ADCY8', 'EVPL', 'PTHLH', 'NHLH2', 'IGSF21', 'GNA15', 'BCL2L10', 'NPY', 'SUSD4', 'OTX2', 'NPTX1', 'OTX1', 'WNT1', 'ST14', 'TMEM30B', 'WNT7B', 'HTR1A', …	ChEA (experimentally validated targets)	upregulated
SUZ12_18692474_ChIP-Seq_MEFs_Mouse	-2.02194	28.091	0.000194939	9.25341e-07	['BARHL1', 'PTPRT', 'LAD1', 'VIPR2', 'IHH', 'RAX', 'SIX6', 'SIX3', 'FEZF2', 'FOXD3', 'DUSP2', 'EDN1', 'SLC30A3', 'EPHA8', 'OVOL1', 'SORCS3', 'VAV1', 'ADRA2A', 'POU3F4', 'SCNN1G', 'PKP1', 'LY6H', 'HMX2', 'SATB1', 'SLC1A1', 'TACSTD2', 'SEZ6', 'TMPRSS2', 'GATA3', 'ADCY8', 'PTHLH', 'NHLH2', 'GNA14', 'NT5E', 'NNAT', 'OTX2', 'NPTX1', 'OTX1', 'IGFBP6', 'CRYM', 'WNT1', 'HES5', 'SRMS', 'GALNT3', 'EGR4', '…	ChEA (experimentally validated targets)	upregulated
EZH2_27294783_Chip-Seq_ESCs_Mouse	-1.5162	20.478	0.000215296	1.36263e-06	['BARHL1', 'PTPRT', 'SERPINA11', 'LAD1', 'FCGBP', 'TINAGL1', 'HPSE2', 'ITGB4', 'GPR68', 'FAM69C', 'IHH', 'RAX', 'CLEC14A', 'BEST2', 'NIPAL4', 'CYP26B1', 'SIX6', 'NETO1', 'DUOXA1', 'SIX3', 'FEZF2', 'FEZF1', 'HES7', 'FOXD3', 'EDN1', 'UNC5A', 'EPHA8', 'NHLRC4', 'MATK', 'SORCS3', 'MMP9', 'TM4SF1', 'ADRA2A', 'OVOL2', 'SHISA6', 'ACTA1', 'ADCYAP1', 'CYP26C1', 'DPPA3', 'CLDN7', 'LTB', 'SPATA18', 'LY6H', …	ChEA (experimentally validated targets)	upregulated
IRX3_human_tf_ARCHS4_coexpression	-1.51908	18.0365	0.00022105	6.97414e-06	['TFAP2A', 'IFITM10', 'ARHGAP8', 'CNTD2', 'IDUA', 'TACSTD2', 'FOXJ1', 'BICDL2', 'GATA3', 'VTCN1', 'EVPL', 'GRHL2', 'ALDH3B2', 'CLDN4', 'MLPH', 'CLDN3', 'AGR3', 'PLEKHN1', 'PKP3', 'SPATA18', 'CYP2F1', 'TJP3']	ARCHS4 (coexpressed genes)	upregulated
GATA3_human_tf_ARCHS4_coexpression	-1.53495	18.2249	0.00022105	6.97414e-06	['TFAP2A', 'ST14', 'IFITM10', 'ARHGAP8', 'TMEM30B', 'IDUA', 'TACSTD2', 'BICDL2', 'OVOL1', 'CYP4F22', 'EVPL', 'GRHL2', 'ALDH3B2', 'CLDN4', 'MLPH', 'CLDN3', 'P2RX2', 'SPTSSB', 'PKP3', 'AP1M2', 'TJP3', 'RBBP8NL']	ARCHS4 (coexpressed genes)	upregulated
SUZ12_27294783_Chip-Seq_ESCs_Mouse	-1.45232	18.7003	0.000323372	2.55833e-06	['BARHL1', 'PTPRT', 'LAD1', 'TINAGL1', 'HPSE2', 'GPR68', 'IHH', 'HSPB2', 'RAX', 'LAMC2', 'CLEC14A', 'BEST2', 'SHD', 'NIPAL4', 'CYP26B1', 'SIX6', 'FEZF2', 'FEZF1', 'HES7', 'FOXD3', 'EDN1', 'UNC5A', 'NHLRC4', 'MATK', 'TAP2', 'SHISA2', 'OVOL1', 'CBFA2T3', 'MMP9', 'VAV1', 'OVOL2', 'SHISA6', 'ADCYAP1', 'CYP26C1', 'SLCO4A1', 'DPPA3', 'CRISPLD2', 'CLDN7', 'PKP1', 'IRF6', 'PKP3', 'LTB', 'CRYAA', 'LRRC3B'…	ChEA (experimentally validated targets)	upregulated
BMI1_23680149_ChIP-Seq_NPCS_Mouse	-2.06205	25.0237	0.000565272	5.3665e-06	['BARHL1', 'HPSE2', 'IHH', 'ELAVL4', 'RAX', 'SIX6', 'HHEX', 'SIX3', 'FEZF2', 'FEZF1', 'FOXD3', 'CR2', 'EDN1', 'SLC30A3', 'OVOL1', 'CBFA2T3', 'TM4SF1', 'ADRA2A', 'OVOL2', 'ADCYAP1', 'CLDN3', 'CLDN7', 'PKP1', 'LCP1', 'SPATA18', 'SLC27A2', 'HMX2', 'SATB1', 'TMEM59L', 'WNT8B', 'GATA3', 'PTHLH', 'NHLH2', 'PROKR2', 'CYP4X1', 'NPY', 'PENK', 'NPTX1', 'GBP2', 'WNT1', 'ANKRD34B', 'GALNT3', 'TMEM30B', 'HTR1…	ChEA (experimentally validated targets)	upregulated
FOXE1_human_tf_ARCHS4_coexpression	-1.50167	16.0633	0.000672876	2.26138e-05	['FCGBP', 'CLIC3', 'TINAGL1', 'RAMP3', 'TMEM30B', 'TACSTD2', 'FAM189A2', 'KRT7', 'KRT5', 'EVPL', 'SCEL', 'IGHG1', 'KRT17', 'TRIM29', 'DUOXA1', 'LY6D', 'PKP1', 'RGL3', 'ANXA8', 'IRF6', 'KRT6A']	ARCHS4 (coexpressed genes)	upregulated
CREB3L4_human_tf_ARCHS4_coexpression	-1.56847	16.7779	0.000672876	2.26138e-05	['SPON2', 'ST14', 'SRMS', 'ARHGAP8', 'TMPRSS2', 'BICDL2', 'GATA3', 'GRHL2', 'BSPRY', 'ALDH3B2', 'CLDN4', 'AZGP1', 'MLPH', 'CLDN3', 'AGR2', 'AGR3', 'CYTL1', 'AP1M2', 'TJP3', 'SLC18A2', 'ZNF662']	ARCHS4 (coexpressed genes)	upregulated
HES2_human_tf_ARCHS4_coexpression	-1.85161	19.8065	0.000672876	2.26138e-05	['COL17A1', 'LAMB3', 'WNT7B', 'KRT5', 'KLK10', 'SERPINB5', 'PTHLH', 'GJB2', 'FAM83F', 'KRT17', 'GJB3', 'TRIM29', 'ADGRF4', 'KRT14', 'PKP1', 'ANXA8', 'IRF6', 'S100A14', 'PKP3', 'TNS4', 'KRT6A']	ARCHS4 (coexpressed genes)	upregulated
JARID2_20064375_ChIP-Seq_MESCs_Mouse	-2.00817	22.7501	0.00108547	1.20226e-05	['BARHL1', 'PTPRT', 'IHH', 'RAX', 'GPR176', 'CYP26B1', 'SIX6', 'NETO1', 'SIX3', 'FEZF2', 'CADPS2', 'DUSP2', 'SLC30A3', 'OVOL1', 'SORCS3', 'CBFA2T3', 'ADRA2A', 'OVOL2', 'CYP26C1', 'ASTL', 'PKP1', 'HMX2', 'KLHL14', 'SATB1', 'TMEM59L', 'TACSTD2', 'WNT8B', 'GATA3', 'ADCY8', 'PTHLH', 'NHLH2', 'IGSF21', 'NT5E', 'NPTX1', 'OTX1', 'WNT1', 'HES5', 'ANKRD34B', 'GALNT3', 'EGR4', 'TMEM30B', 'WNT7B', 'IQSEC3',…	ChEA (experimentally validated targets)	upregulated
SUZ12_18555785_ChIP-Seq_MESCs_Mouse	-2.12456	22.5261	0.00196305	2.48488e-05	['PTPRT', 'IHH', 'CLEC14A', 'GPR176', 'NETO1', 'DUOXA1', 'FEZF2', 'SLC18A2', 'FOXD3', 'CADPS2', 'EDN1', 'SLC30A3', 'TAP2', 'OVOL1', 'ADRA2A', 'OVOL2', 'POU3F4', 'SSTR5', 'PKP1', 'LRRC3B', 'LY6H', 'SATB1', 'TMEM59L', 'TACSTD2', 'SEZ6', 'TMPRSS2', 'ADCY8', 'PTHLH', 'IGSF21', 'HRH1', 'OTX2', 'NPTX1', 'OTX1', 'WNT1', 'HES5', 'SRMS', 'TMEM30B', 'IQSEC3', 'HTR1A', 'GRHL2', 'HEYL', 'NELL1', 'CYP26A1', '…	ChEA (experimentally validated targets)	upregulated
SSH3_human_tf_ARCHS4_coexpression	-1.52511	14.5961	0.00199417	6.97549e-05	['LAD1', 'ST14', 'TINAGL1', 'IDUA', 'ITGB4', 'TACSTD2', 'GATA3', 'EVPL', 'GRHL2', 'CLDN4', 'MLPH', 'DPP7', 'CLDN3', 'TRIM29', 'B3GNT3', 'MAL2', 'MYH14', 'PLEKHN1', 'PKP3', 'TJP3']	ARCHS4 (coexpressed genes)	upregulated
KLF4_human_tf_ARCHS4_coexpression	-1.5621	14.9501	0.00199417	6.97549e-05	['LAD1', 'FCGBP', 'ST14', 'CDSN', 'OVOL1', 'IL22RA1', 'CLDN4', 'CLDN3', 'TRIM29', 'SCNN1B', 'CLDN7', 'CA4', 'B3GNT3', 'CHP2', 'PKP1', 'MYH14', 'PKP3', 'VILL', 'HLA-DRB3', 'TJP3']	ARCHS4 (coexpressed genes)	upregulated
SUZ12_18974828_ChIP-Seq_MESCs_Mouse	-1.71186	17.0411	0.00333575	4.75028e-05	['PTPRT', 'LAD1', 'IHH', 'HSPB2', 'RAX', 'GPR176', 'SIX6', 'NETO1', 'PLAU', 'DUOXA1', 'SIX3', 'ME3', 'FEZF2', 'HES7', 'FOXD3', 'CADPS2', 'DUSP2', 'EDN1', 'SLC30A3', 'OVOL1', 'SORCS3', 'MMP9', 'ADRA2A', 'OVOL2', 'POU3F4', 'SSTR5', 'CLDN3', 'PKP1', 'LRRC3B', 'LY6H', 'SLC27A2', 'HMX2', 'KLHL14', 'LUZP2', 'SATB1', 'TACSTD2', 'SEZ6', 'PDGFB', 'TMPRSS2', 'GATA3', 'TULP1', 'ADCY8', 'NDRG1', 'PTHLH', 'NH…	ChEA (experimentally validated targets)	upregulated
SUZ12_18692474_ChIP-Seq_MESCs_Mouse	-1.78762	17.5636	0.00341761	5.4076e-05	['BARHL1', 'PTPRT', 'LAD1', 'VIPR2', 'ITGB4', 'IHH', 'RAX', 'GPR176', 'SIX6', 'NETO1', 'DUOXA1', 'SIX3', 'FEZF2', 'RSPO4', 'SLC18A2', 'HES7', 'FOXD3', 'CADPS2', 'DUSP2', 'EDN1', 'SLC30A3', 'UNC5A', 'EPHA8', 'OVOL1', 'SORCS3', 'VAV1', 'ADRA2A', 'POU3F4', 'SCNN1G', 'PKP1', 'LY6H', 'HMX2', 'KLHL14', 'LUZP2', 'SATB1', 'SLC1A1', 'TACSTD2', 'SEZ6', 'TMPRSS2', 'GATA3', 'ADCY8', 'PTHLH', 'NHLH2', 'IGSF21…	ChEA (experimentally validated targets)	upregulated
SUZ12_16625203_ChIP-ChIP_MESCs_Mouse	-2.5213	23.3664	0.00542565	9.44339e-05	['BARHL1', 'PTPRT', 'IHH', 'RAX', 'CXCL5', 'CHCHD2', 'SIX6', 'HHEX', 'NETO1', 'SIX3', 'HES7', 'CADPS2', 'DUSP2', 'EDN1', 'SLC30A3', 'EPHA8', 'TAP2', 'OVOL1', 'MMP9', 'POU3F4', 'PKP1', 'LY6H', 'HMX2', 'LUZP2', 'TACSTD2', 'SEZ6', 'TMPRSS2', 'GATA3', 'TULP1', 'ADCY8', 'PTHLH', 'NHLH2', 'NT5E', 'NPY', 'OTX2', 'NPTX1', 'OTX1', 'IGFBP6', 'WNT1', 'HES5', 'ST14', 'SRMS', 'GALNT3', 'EGR4', 'TMEM30B', 'HTR…	ChEA (experimentally validated targets)	upregulated
CREB3L3_human_tf_ARCHS4_coexpression	-1.50341	12.7727	0.00551639	0.000204311	['CCL25', 'SERPINA11', 'FCGBP', 'CBR1', 'SMIM24', 'GOLT1A', 'HPN', 'NR1I2', 'SLC1A1', 'IHH', 'CIDEB', 'ANO9', 'MAT1A', 'NAALADL1', 'IL22RA1', 'CDC42EP5', 'PAH', 'CLDN7', 'CHP2']	ARCHS4 (coexpressed genes)	upregulated
BATF_human_tf_ARCHS4_coexpression	-1.50282	12.7678	0.00551639	0.000204311	['IL32', 'GSDMD', 'DUSP2', 'SERPINB2', 'GPR68', 'HAPLN3', 'TNF', 'PSMB8', 'VAV1', 'NIPAL4', 'C15ORF48', 'DPP7', 'TRBC2', 'LCP1', 'GBP2', 'KCNN4', 'SLC15A3', 'HLA-DRB3', 'CH507-9B2.1']	ARCHS4 (coexpressed genes)	upregulated
NR4A1_human_tf_ARCHS4_coexpression	-1.48362	12.6047	0.00551639	0.000204311	['NAPSA', 'RAMP3', 'ARHGAP8', 'EGR4', 'IDUA', 'PDGFB', 'FAM189A2', 'C8ORF4', 'TMPRSS2', 'BICDL2', 'GRHL2', 'CPLX3', 'HEYL', 'C1ORF116', 'MLPH', 'CSRP1', 'CRISPLD2', 'ADGRF5', 'A2M']	ARCHS4 (coexpressed genes)	upregulated
JARID2_20075857_ChIP-Seq_MESCs_Mouse	-1.89089	16.799	0.00729779	0.000138566	['PTPRT', 'LAD1', 'TINAGL1', 'HPSE2', 'IHH', 'RAX', 'CYP26B1', 'SIX6', 'SIX3', 'FEZF2', 'FEZF1', 'HES7', 'FOXD3', 'SLC30A3', 'EPHA8', 'OVOL1', 'SORCS3', 'ADRA2A', 'SHISA6', 'NAALADL1', 'CLDN3', 'CYP26C1', 'PKP1', 'SPATA18', 'HMX2', 'TMEM59L', 'SEZ6', 'GATA3', 'TULP1', 'ADCY8', 'NHLH2', 'IGSF21', 'PROKR2', 'NT5E', 'TMEM125', 'NPTX1', 'OTX1', 'WNT1', 'CADM3', 'PLK5', 'GALNT3', 'EGR4', 'TMEM30B', 'W…	ChEA (experimentally validated targets)	upregulated
EZH2_18974828_ChIP-Seq_MESCs_Mouse	-2.00186	17.2894	0.00801176	0.000177476	['PTPRT', 'IHH', 'RAX', 'GPR176', 'SIX6', 'PLAU', 'SIX3', 'FEZF2', 'HES7', 'FOXD3', 'CR2', 'DUSP2', 'EDN1', 'SLC30A3', 'OVOL1', 'SORCS3', 'ADRA2A', 'OVOL2', 'CLDN3', 'PKP1', 'HMX2', 'KLHL14', 'TACSTD2', 'SEZ6', 'PDGFB', 'GATA3', 'TULP1', 'ADCY8', 'PTHLH', 'NHLH2', 'IGSF21', 'PROKR2', 'NT5E', 'NPY', 'OTX2', 'NPTX1', 'OTX1', 'WNT1', 'HES5', 'CADM3', 'SRMS', 'GALNT3', 'EGR4', 'TMEM30B', 'WNT7B', 'HT…	ChEA (experimentally validated targets)	upregulated
RNF2_18974828_ChIP-Seq_MESCs_Mouse	-1.99615	17.2401	0.00801176	0.000177476	['PTPRT', 'IHH', 'RAX', 'GPR176', 'SIX6', 'PLAU', 'SIX3', 'FEZF2', 'HES7', 'FOXD3', 'CR2', 'DUSP2', 'EDN1', 'SLC30A3', 'OVOL1', 'SORCS3', 'ADRA2A', 'OVOL2', 'CLDN3', 'PKP1', 'HMX2', 'KLHL14', 'TACSTD2', 'SEZ6', 'PDGFB', 'GATA3', 'TULP1', 'ADCY8', 'PTHLH', 'NHLH2', 'IGSF21', 'PROKR2', 'NT5E', 'NPY', 'OTX2', 'NPTX1', 'OTX1', 'WNT1', 'HES5', 'CADM3', 'SRMS', 'GALNT3', 'EGR4', 'TMEM30B', 'WNT7B', 'HT…	ChEA (experimentally validated targets)	upregulated
AR_human_tf_ARCHS4_coexpression	-1.51349	11.3133	0.0147649	0.000567102	['SRMS', 'ARHGAP8', 'GALNT3', 'HPN', 'IHH', 'TMPRSS2', 'RP11-438J1.1', 'EVPL', 'GRHL2', 'NDRG1', 'OVOL2', 'SSTR5', 'C1ORF116', 'MLPH', 'DPP7', 'NETO1', 'ACSS1', 'RBBP8NL']	ARCHS4 (coexpressed genes)	upregulated
PAX1_human_tf_ARCHS4_coexpression	-1.48209	11.0786	0.0147649	0.000567102	['ST14', 'SHC2', 'TLE2', 'LYNX1', 'CDSN', 'TMEM30B', 'LUZP2', 'GATA3', 'BSPRY', 'AES', 'CLDN4', 'EPGN', 'CSRP1', 'RAB19', 'RGL3', 'GPAA1P2', 'RAB17', 'CRB3']	ARCHS4 (coexpressed genes)	upregulated
EED_16625203_ChIP-ChIP_MESCs_Mouse	-2.63086	19.9081	0.0217898	0.000517163	['BARHL1', 'PTPRT', 'IHH', 'TACSTD2', 'SEZ6', 'RAX', 'TMPRSS2', 'GATA3', 'ADCY8', 'CXCL5', 'PTHLH', 'NHLH2', 'GNA14', 'NT5E', 'SIX6', 'NETO1', 'SIX3', 'NPTX1', 'OTX1', 'WNT1', 'HES5', 'HES7', 'SRMS', 'SLC30A3', 'EGR4', 'TMEM30B', 'HTR1A', 'OVOL1', 'MMP9', 'POU3F4', 'CYP26A1', 'CYP24A1', 'CLDN3', 'AGBL2', 'PKP1', 'LHX5', 'RGL3']	ChEA (experimentally validated targets)	upregulated
EZH2_23942234_ChIP-Seq_MYOBLASTS_AND_MYOTUBES_Mouse	-2.04375	14.8678	0.0271289	0.000692805	['VIPR2', 'ITGB4', 'FAM69C', 'IHH', 'SEZ6', 'PDGFB', 'ADCY8', 'PRSS21', 'SIX6', 'DUOXA1', 'NPTX1', 'FEZF2', 'WNT1', 'GALNT9', 'PLK5', 'LRRC24', 'SLC30A3', 'VWF', 'EGR4', 'UNC5A', 'EPHA8', 'WNT7B', 'SNAI3', 'SLC52A3', 'MYO7B', 'OVOL1', 'CBFA2T3', 'OVOL2', 'AES', 'NAALADL1', 'ACTA1', 'TTLL6', 'CYP26A1', 'CYP24A1', 'CRISPLD2', 'PPP1R1B', 'LHX5', 'TGFBI', 'LY6H', 'CRB3']	ChEA (experimentally validated targets)	upregulated
MTF2_20144788_ChIP-Seq_MESCs_Mouse	-1.19139	8.60521	0.0271289	0.000729732	['VIPR2', 'IHH', 'RAX', 'ZC3HAV1L', 'GPR176', 'TNS4', 'HES7', 'CADPS2', 'TLE2', 'SLC30A3', 'UNC5A', 'EPHA8', 'MATK', 'SHISA2', 'OVOL1', 'OVOL2', 'POU3F4', 'CLDN3', 'ASTL', 'SCNN1B', 'PKP1', 'LY6H', 'KANK4', 'SHC2', 'KLHL14', 'HPN', 'TMEM59L', 'SLC1A1', 'TACSTD2', 'PDGFB', 'GATA3', 'NDRG1', 'NHLH2', 'IGSF21', 'HRH1', 'OTX2', 'NPTX1', 'OTX1', 'IGFBP6', 'WNT1', 'ANKRD34B', 'CADM3', 'EGR4', 'HTR1A', …	ChEA (experimentally validated targets)	upregulated
IRF8_human_tf_ARCHS4_coexpression	-1.4876	9.68421	0.0328831	0.00148853	['DENND1C', 'CR2', 'DUSP2', 'SCT', 'LY75', 'TAP2', 'TNF', 'VAV1', 'PYCARD', 'BLNK', 'HLA-DRA', 'LCP1', 'KCNN4', 'DOCK2', 'SLC15A3', 'HLA-DRB3', 'CH507-9B2.1']	ARCHS4 (coexpressed genes)	upregulated
HNF4A_human_tf_ARCHS4_coexpression	-1.42647	9.28628	0.0328831	0.00148853	['CCL25', 'SERPINA11', 'FCGBP', 'GOLT1A', 'HPN', 'NR1I2', 'IHH', 'MAT1A', 'IL22RA1', 'PAH', 'EHHADH', 'CLDN7', 'B3GNT3', 'CHP2', 'MYH14', 'RAB17', 'A2M']	ARCHS4 (coexpressed genes)	upregulated
PITX1_human_tf_ARCHS4_coexpression	-1.63583	10.6492	0.0328831	0.00148853	['LAD1', 'SPRR3', 'TACSTD2', 'A2ML1', 'KLK10', 'EVPL', 'MTND4LP30', 'SCEL', 'GJB2', 'C1ORF116', 'TRIM29', 'DUOXA1', 'LY6D', 'ANXA8', 'S100A14', 'PLEKHN1', 'PKP3']	ARCHS4 (coexpressed genes)	upregulated
HLA-DRB3_human_tf_ARCHS4_coexpression	-1.54995	10.0901	0.0328831	0.00148853	['GSDMD', 'DENND1C', 'CR2', 'DUSP2', 'LY75', 'TAP2', 'PSMB8', 'VAV1', 'PYCARD', 'DPP7', 'BLNK', 'HLA-DRA', 'LCP1', 'KCNN4', 'DOCK2', 'SLC15A3', 'CH507-9B2.1']	ARCHS4 (coexpressed genes)	upregulated
HLA-DQB1_human_tf_ARCHS4_coexpression	-1.51218	9.84425	0.0328831	0.00148853	['GSDMD', 'DENND1C', 'CR2', 'DUSP2', 'LY75', 'TAP2', 'PSMB8', 'VAV1', 'C15ORF48', 'IGHG1', 'BLNK', 'HLA-DRA', 'LCP1', 'DOCK2', 'SLC15A3', 'HLA-DRB3', 'CH507-9B2.1']	ARCHS4 (coexpressed genes)	upregulated
HOPX_human_tf_ARCHS4_coexpression	-1.49245	9.71579	0.0328831	0.00148853	['IL32', 'SPRR3', 'CDSN', 'A2ML1', 'KLK10', 'EVPL', 'SERPINB5', 'C1ORF116', 'LCK', 'SIT1', 'TRIM29', 'DUOXA1', 'TRBC2', 'LY6D', 'PKP1', 'IL36RN', 'LTB']	ARCHS4 (coexpressed genes)	upregulated
GATA5_human_tf_ARCHS4_coexpression	-1.51772	9.88032	0.0328831	0.00148853	['CCL25', 'FCGBP', 'SMIM24', 'UCMA', 'NR1I2', 'SLC1A1', 'SLC52A3', 'IHH', 'CIDEB', 'ANO9', 'NAALADL1', 'CDC42EP5', 'CLDN7', 'CHP2', 'RAB17', 'S100A14', 'CRB3']	ARCHS4 (coexpressed genes)	upregulated
NFKB1_human_tf_ARCHS4_coexpression	-1.4624	9.52019	0.0328831	0.00148853	['DUSP2', 'SERPINB2', 'CXCL8', 'TAP2', 'HAPLN3', 'TNF', 'VAV1', 'NIPAL4', 'C15ORF48', 'LCP1', 'GBP2', 'KCNN4', 'DOCK2', 'SLC15A3', 'HLA-DRB3', 'TLR4', 'CH507-9B2.1']	ARCHS4 (coexpressed genes)	upregulated
ETS2_human_tf_ARCHS4_coexpression	-1.46276	9.52253	0.0328831	0.00148853	['GSDMD', 'LAD1', 'FCGBP', 'ST14', 'SERPINB2', 'CXCL8', 'NR1I2', 'CBFA2T3', 'NIPAL4', 'GNA15', 'HHEX', 'SLC17A9', 'MYH14', 'CYTL1', 'VILL', 'A2M', 'SLC15A3']	ARCHS4 (coexpressed genes)	upregulated
FOXA3_human_tf_ARCHS4_coexpression	-1.46659	9.54745	0.0328831	0.00148853	['SERPINA11', 'FCGBP', 'GOLT1A', 'HPN', 'NR1I2', 'IHH', 'MAT1A', 'IL22RA1', 'CDC42EP5', 'PAH', 'EHHADH', 'CLDN7', 'B3GNT3', 'AGR2', 'RAB17', 'AP1M2', 'TJP3']	ARCHS4 (coexpressed genes)	upregulated

## Sheet: vs H9 hESC-iMEF (Takashima)
term_name	zscore	combined_score	FDR	pvalue	overlapping_genes	gene_set_library	geneset
ZNF354B_human_tf_ARCHS4_coexpression	-1.69571	174.85	2.3743e-42	1.65457e-45	['NRSN1', 'HIST2H2AA4', 'HIST2H2AB', 'AP000769.1', 'RNY4P13', 'HIST2H2AC', 'METTL12', 'DNM1P47', 'POTEI', 'KYNU', 'TMEM107', 'HIST1H1D', 'HIST1H2AE', 'HIST1H1E', 'HIST1H2AD', 'RIMBP3C', 'HIST1H2AG', 'AC096921.2', 'HIST1H1B', 'HIST1H1C', 'HIST1H2AB', 'HIST1H2AM', 'CDCA4P4', 'HIST1H2AI', 'PLLP', 'HIST1H2AH', 'HIST1H2AK', 'HIST1H2AJ', 'HIST2H2BF', 'HIST2H2BE', 'HIST2H3A', 'HIST4H4', 'HIST1H2BF', 'HI…	ARCHS4 (coexpressed genes)	downregulated
HIST1H1D_human_tf_ARCHS4_coexpression	-1.75164	176.114	1.55115e-41	2.16188e-44	['NRSN1', 'HIST2H2AA4', 'HIST2H2AB', 'HIST2H2AC', 'DNM1P47', 'HIST1H2AE', 'HIST1H1E', 'HIST1H2AD', 'RIMBP3C', 'HIST3H2BB', 'HIST1H2AG', 'HIST3H2BA', 'HIST1H1C', 'HIST1H2AB', 'HIST1H2AM', 'HIST1H2AL', 'HIST1H2AI', 'PLLP', 'HIST1H2AH', 'HIST1H2AK', 'HIST1H2AJ', 'WDR74', 'HIST2H2BF', 'HIST2H2BE', 'HIST2H3A', 'HIST4H4', 'HIST1H2BF', 'HIST1H2BE', 'HIST1H2BH', 'HIST1H2BG', 'HIST1H2BB', 'HIST2H3D', 'PPE…	ARCHS4 (coexpressed genes)	downregulated
HIST1H1E_human_tf_ARCHS4_coexpression	-1.67383	164.025	1.32254e-40	2.76489e-43	['NRSN1', 'HIST2H2AA4', 'HIST2H2AB', 'HIST2H2AC', 'DNM1P47', 'HIST1H1D', 'HIST1H2AE', 'HIST1H2AD', 'RIMBP3C', 'HIST3H2BB', 'HIST1H2AG', 'HIST3H2BA', 'HIST1H1B', 'HIST1H1C', 'HIST1H2AB', 'HIST1H2AM', 'HIST1H2AL', 'PLLP', 'HIST1H2AH', 'HIST1H2AK', 'HIST1H2AJ', 'WDR74', 'HIST2H2BF', 'HIST2H2BE', 'HIST2H3A', 'HIST4H4', 'HIST1H2BF', 'HIST1H2BE', 'HIST1H2BH', 'HIST1H2BG', 'HIST1H2BB', 'HIST2H3D', 'PPEF…	ARCHS4 (coexpressed genes)	downregulated
HIST1H1B_human_tf_ARCHS4_coexpression	-1.67509	159.916	9.93156e-40	3.46048e-42	['NRSN1', 'HIST2H2AA4', 'HIST2H2AB', 'HIST2H2AC', 'HIST1H1D', 'HIST1H2AE', 'HIST1H1E', 'HIST1H2AD', 'RIMBP3C', 'HIST3H2BB', 'HIST1H2AG', 'HIST3H2BA', 'HIST1H1C', 'HIST1H2AB', 'HIST1H2AM', 'HIST1H2AL', 'HIST1H2AI', 'PLLP', 'HIST1H2AH', 'HIST1H2AK', 'HIST1H2AJ', 'WDR74', 'HIST2H2BF', 'HIST2H2BE', 'HIST2H3A', 'HIST4H4', 'HIST1H2BF', 'HIST1H2BE', 'HIST1H2BH', 'HIST1H2BG', 'HIST1H2BB', 'HIST2H3D', 'PP…	ARCHS4 (coexpressed genes)	downregulated
HIST1H1C_human_tf_ARCHS4_coexpression	-1.57829	150.675	9.93156e-40	3.46048e-42	['NRSN1', 'HIST2H2AA4', 'HIST2H2AB', 'HIST2H2AC', 'HIST1H1D', 'HIST1H2AE', 'HIST1H1E', 'HIST1H2AD', 'RIMBP3C', 'HIST3H2BB', 'HIST1H2AG', 'HIST3H2BA', 'HIST1H1B', 'HIST1H2AB', 'HIST1H2AM', 'HIST1H2AL', 'HIST1H2AI', 'PLLP', 'HIST1H2AH', 'HIST1H2AK', 'HIST1H2AJ', 'WDR74', 'HIST2H2BF', 'HIST2H2BE', 'HIST2H3A', 'HIST4H4', 'HIST1H2BF', 'HIST1H2BE', 'HIST1H2BH', 'HIST1H2BG', 'HIST1H2BB', 'HIST2H3D', 'PP…	ARCHS4 (coexpressed genes)	downregulated
ZNF75A_human_tf_ARCHS4_coexpression	-1.61265	145.911	1.21405e-37	5.07616e-40	['NRSN1', 'HIST2H2AA4', 'HIST2H2AB', 'RNY4P13', 'HIST2H2AC', 'METTL12', 'TMEM107', 'HIST1H2AE', 'HIST1H2AD', 'HIST3H2BB', 'HIST1H2AG', 'HIST1H1A', 'HIST1H1C', 'HIST1H2AB', 'HIST1H2AM', 'ZNF483', 'HIST1H2AI', 'PLLP', 'HIST1H2AH', 'HIST1H2AK', 'HIST2H2BF', 'HIST2H2BE', 'GBP1P1', 'HIST2H3A', 'HIST4H4', 'HIST1H2BF', 'HIST1H2BE', 'PFN1P2', 'HIST1H2BG', 'HIST1H2BB', 'HIST2H3D', 'PPEF2', 'HIST2H3C', 'HI…	ARCHS4 (coexpressed genes)	downregulated
CDC5L_human_tf_ARCHS4_coexpression	-1.62903	127.718	1.82996e-32	8.92663e-35	['HIST2H2AA4', 'RP11-354K4.1', 'HIST2H2AB', 'EFCAB12', 'RNY4P13', 'RP11-113I24.1', 'METTL12', 'TMEM107', 'HIST1H2AE', 'HIST3H2BB', 'HIST1H2AG', 'AMH', 'HIST1H1A', 'HIST1H1C', 'HIST1H2AB', 'HIST1H2AM', 'HIST1H2AH', 'WDR74', 'MTHFD2P1', 'HIST2H2BF', 'LRRC37A', 'GBP1P1', 'HIST2H3A', 'HIST4H4', 'HIST1H2BF', 'HIST1H2BG', 'RPSAP48', 'HIST1H2BB', 'HIST2H3D', 'PPEF2', 'HIST2H3C', 'HIST1H2BD', 'HIST1H2BC'…	ARCHS4 (coexpressed genes)	downregulated
DBP_human_tf_ARCHS4_coexpression	-1.77832	88.6342	3.60365e-20	2.26013e-22	['HIST1H2BN', 'GCM1', 'HIST2H2AA4', 'HEPACAM', 'RP11-354K4.1', 'HIST2H2AB', 'RNY4P13', 'RP11-113I24.1', 'RPS3AP46', 'HIST2H2AC', 'TNFSF13B', 'METTL12', 'HIST2H4A', 'TMEM107', 'HIST3H2BB', 'HIST1H2AG', 'HIST3H2BA', 'NIFKP4', 'SAMD12', 'RP1-34L19.1', 'KCNJ3', 'HIST1H3E', 'FAM83A', 'UBTFL11', 'LRRC69', 'ZNF483', 'RP1-34B20.21', 'ABC7-42418200C9.1', 'WDR74', 'MTHFD2P1', 'AC006509.7', 'HIST2H2BF', 'LR…	ARCHS4 (coexpressed genes)	downregulated
HES7_human_tf_ARCHS4_coexpression	-1.7474	87.0928	3.60365e-20	2.26013e-22	['HIST1H2BN', 'HIST1H2BO', 'HIST2H2AA4', 'HIST1H2BJ', 'HIST1H3J', 'METTL12', 'HIST2H4A', 'HIST1H3A', 'TMEM107', 'HIST1H3F', 'HIST1H2AE', 'HIST3H2BB', 'HIST1H3H', 'HIST1H2AG', 'HIST1H3I', 'HIST1H3B', 'HIST1H3C', 'HIST1H1A', 'HIST1H3E', 'HIST1H2AB', 'HIST1H2AM', 'RP1-34B20.21', 'HIST1H2AH', 'HIST1H2AK', 'WDR74', 'H2BFS', 'HIST2H2BF', 'GBP1P1', 'AC004386.4', 'HIST1H4B', 'FCGR2A', 'HIST2H3A', 'HIST4H…	ARCHS4 (coexpressed genes)	downregulated
SHOX_human_tf_ARCHS4_coexpression	-1.86912	82.0368	1.24574e-17	8.68114e-20	['CCNB3P1', 'RP11-484L7.1', 'GCM1', 'KCNG4', 'HEPACAM', 'RP11-354K4.1', 'LRTM1', 'AC073065.3', 'RP11-113I24.1', 'KB-1980E6.2', 'RPS3AP46', 'FAM60DP', 'NUGGC', 'TNFSF13B', 'NEUROD1', 'HMGN1P14', 'EEF1A1P31', 'CNR2', 'RP11-44D5.1', 'NIFKP4', 'FGF23', 'SRGAP1', 'RP1-34L19.1', 'KCNJ3', 'LRRC69', 'ABC7-42418200C9.1', 'RP11-93O17.2', 'MTHFD2P1', 'AC006509.7', 'PSG2', 'AC000367.1', 'RP4-569D19.5', 'LRRC…	ARCHS4 (coexpressed genes)	downregulated
GCM1_human_tf_ARCHS4_coexpression	-1.93899	81.37	7.76726e-17	5.954e-19	['CCNB3P1', 'RP11-484L7.1', 'HEPACAM', 'RP11-354K4.1', 'LRTM1', 'RP11-350G24.2', 'AC073065.3', 'AC002429.5', 'RP11-113I24.1', 'KB-1980E6.2', 'RPS3AP46', 'NUGGC', 'TNFSF13B', 'NEUROD1', 'HMGN1P14', 'EEF1A1P31', 'CNR2', 'NIFKP4', 'SRGAP1', 'RP1-34L19.1', 'KCNJ3', 'UBTFL11', 'LRRC69', 'CCBE1', 'ABC7-42418200C9.1', 'RP11-93O17.2', 'MTHFD2P1', 'AC006509.7', 'RP4-569D19.5', 'LRRC37A', 'GBP1P1', 'AC0043…	ARCHS4 (coexpressed genes)	downregulated
ZNF688_human_tf_ARCHS4_coexpression	-1.92651	77.1944	4.37474e-16	3.96318e-18	['RP11-484L7.1', 'GCM1', 'HEPACAM', 'RP11-354K4.1', 'LRTM1', 'RP11-350G24.2', 'AC073065.3', 'RP11-113I24.1', 'KB-1980E6.2', 'RPS3AP46', 'NUGGC', 'TNFSF13B', 'NEUROD1', 'HMGN1P14', 'EEF1A1P31', 'CNR2', 'NIFKP4', 'SRGAP1', 'RP1-34L19.1', 'KCNJ3', 'UBTFL11', 'LRRC69', 'CCBE1', 'ABC7-42418200C9.1', 'RP11-93O17.2', 'MTHFD2P1', 'AC006509.7', 'AC000367.1', 'RP4-569D19.5', 'LRRC37A', 'GBP1P1', 'AC004386.…	ARCHS4 (coexpressed genes)	downregulated
PPARA_human_tf_ARCHS4_coexpression	-1.90372	76.281	4.37474e-16	3.96318e-18	['RP11-484L7.1', 'GCM1', 'HEPACAM', 'RP11-354K4.1', 'LRTM1', 'AC073065.3', 'RP11-113I24.1', 'KB-1980E6.2', 'CYP3A5', 'RPS3AP46', 'FAM60DP', 'NUGGC', 'TNFSF13B', 'HMGN1P14', 'EEF1A1P31', 'CNR2', 'NIFKP4', 'FGF23', 'SRGAP1', 'PPIAL4G', 'KCNJ3', 'LRRC69', 'PCDH9', 'ABC7-42418200C9.1', 'RP11-93O17.2', 'MTHFD2P1', 'AC006509.7', 'PSG2', 'RP4-569D19.5', 'LRRC37A', 'GBP1P1', 'PCDHB1', 'AC008686.1', 'NPM1…	ARCHS4 (coexpressed genes)	downregulated
POU2F3_human_tf_ARCHS4_coexpression	-1.95746	71.1935	1.53217e-14	1.60157e-16	['CCNB3P1', 'RP11-484L7.1', 'GCM1', 'KCNG4', 'RP11-354K4.1', 'LRTM1', 'AC073065.3', 'AC002429.5', 'OLA1P3', 'RP11-113I24.1', 'KB-1980E6.2', 'RPS3AP46', 'HTN1', 'NUGGC', 'HMGN1P14', 'CNR2', 'HIST3H2BB', 'PDE6A', 'NIFKP4', 'SAMD12', 'SRGAP1', 'LDHAL6CP', 'PPIAL4G', 'RP1-34L19.1', 'UBTFL11', 'ABC7-42418200C9.1', 'RP11-93O17.2', 'MTHFD2P1', 'AC006509.7', 'OPRM1', 'LRRC37A', 'AC004386.4', 'PCDHB1', 'A…	ARCHS4 (coexpressed genes)	downregulated
ZNF333_human_tf_ARCHS4_coexpression	-1.83191	66.6273	1.53217e-14	1.60157e-16	['RP11-484L7.1', 'GCM1', 'AL023806.1', 'RP11-354K4.1', 'LRTM1', 'AC008072.1', 'AC073065.3', 'EFCAB12', 'OLA1P3', 'RP11-113I24.1', 'KB-1980E6.2', 'RPS3AP46', 'HTN1', 'NUGGC', 'AP002962.1', 'HTN3', 'HMGN1P14', 'RP11-749H20.3', 'RP1-76C18.1', 'CNR2', 'PATE4', 'KYNU', 'RP11-646I6.3', 'SRGAP1', 'LDHAL6CP', 'PPIAL4G', 'RP11-536C10.3', 'RP11-93O17.2', 'ABCA9', 'LHFPL5', 'MTHFD2P1', 'AC006509.7', 'OPRM1'…	ARCHS4 (coexpressed genes)	downregulated
NEUROD2_human_tf_ARCHS4_coexpression	-1.87067	64.6653	8.19781e-14	9.71169e-16	['SLC24A2', 'RP11-484L7.1', 'GCM1', 'HEPACAM', 'RP11-354K4.1', 'LRTM1', 'AC073065.3', 'RP11-113I24.1', 'FAM60DP', 'TNFSF13B', 'NEUROD1', 'HMGN1P14', 'EEF1A1P31', 'CNR2', 'MROH7', 'FGF23', 'SRGAP1', 'PPIAL4G', 'KCNJ3', 'LRRC69', 'PCDH9', 'ABC7-42418200C9.1', 'RP11-93O17.2', 'MTHFD2P1', 'AC006509.7', 'PSG2', 'RP4-569D19.5', 'GBP1P1', 'PCDHB1', 'AC008686.1', 'NPM1P40', 'RP11-43P5.1', 'RPSAP48', 'RP1…	ARCHS4 (coexpressed genes)	downregulated
PLAG1_human_tf_ARCHS4_coexpression	-1.83781	63.5294	8.19781e-14	9.71169e-16	['CCNB3P1', 'RP11-484L7.1', 'GCM1', 'HEPACAM', 'RP11-354K4.1', 'AC002429.5', 'OLA1P3', 'RP11-113I24.1', 'KB-1980E6.2', 'RPS3AP46', 'TNFSF13B', 'NEUROD1', 'METTL12', 'HMGN1P14', 'CNR2', 'HIST3H2BB', 'NIFKP4', 'SRGAP1', 'RP1-34L19.1', 'KCNJ3', 'UBTFL11', 'LRRC69', 'ABC7-42418200C9.1', 'RP11-93O17.2', 'MTHFD2P1', 'AC006509.7', 'RP4-569D19.5', 'LRRC37A', 'GBP1P1', 'FCGR2A', 'PCDHB1', 'AC008686.1', 'S…	ARCHS4 (coexpressed genes)	downregulated
EMX2_human_tf_ARCHS4_coexpression	-2.00596	65.7913	4.54557e-13	5.70176e-15	['CCNB3P1', 'RP11-484L7.1', 'GCM1', 'HEPACAM', 'RP11-354K4.1', 'LRTM1', 'RP11-350G24.2', 'RP11-113I24.1', 'RPS3AP46', 'TNFSF13B', 'HMGN1P14', 'EEF1A1P31', 'NIFKP4', 'SRGAP1', 'PPIAL4G', 'RP1-34L19.1', 'KCNJ3', 'UBTFL11', 'LRRC69', 'ABC7-42418200C9.1', 'KIAA1024L', 'RP11-93O17.2', 'MTHFD2P1', 'AC006509.7', 'RP4-569D19.5', 'LRRC37A', 'AC004386.4', 'PCDHB1', 'AC008686.1', 'NPM1P40', 'RP11-43P5.1', '…	ARCHS4 (coexpressed genes)	downregulated
ZNF480_human_tf_ARCHS4_coexpression	-1.87988	58.3908	2.4462e-12	3.23887e-14	['SULT1C2P1', 'AL023806.1', 'RGSL1', 'LECT2', 'AC008072.1', 'EFCAB12', 'OLA1P3', 'CYP3A5', 'HTN1', 'AP002962.1', 'HTN3', 'GRAMD4P3', 'RP11-749H20.3', 'RP1-76C18.1', 'RP1-274L7.4', 'PATE4', 'KYNU', 'RP11-646I6.3', 'LDHAL6CP', 'RP11-453N18.1', 'PPIAL4G', 'RP11-536C10.3', 'BMS1P17', 'ABCA9', 'LHFPL5', 'RP11-381O7.3', 'AC004076.7', 'OPRM1', 'POU5F2', 'SULT1B1', 'RPS4XP5', 'RP11-402K9.1', 'OR11A1', 'F…	ARCHS4 (coexpressed genes)	downregulated
PPP1R13L_human_tf_ARCHS4_coexpression	-1.66016	54.4498	8.17062e-12	5.70176e-15	['COL17A1', 'LAMA3', 'TACSTD2', 'HSPB1', 'LYPD3', 'CYP4F22', 'CST6', 'WNT6', 'CRACR2B', 'RNF39', 'S100A14', 'KRT6A', 'TFAP2A', 'CDSN', 'LAMB3', 'KRT7', 'GRHL3', 'TINCR', 'KRT5', 'CNFN', 'FOXP4', 'RHOD', 'CLDN4', 'BCAM', 'KRT19', 'C1ORF116', 'LPAR5', 'KRT17', 'PPDPF', 'GJB5', 'KRT14', 'LY6D', 'PKP1', 'RHCG', 'SERINC2', 'PTGES']	ARCHS4 (coexpressed genes)	upregulated
ZNF414_human_tf_ARCHS4_coexpression	-1.84294	54.1044	1.16029e-11	1.77884e-13	['RP11-484L7.1', 'GCM1', 'HEPACAM', 'RP11-354K4.1', 'LRTM1', 'RP11-350G24.2', 'AC073065.3', 'RP11-113I24.1', 'KB-1980E6.2', 'RPS3AP46', 'NUGGC', 'TNFSF13B', 'NEUROD1', 'HMGN1P14', 'EEF1A1P31', 'CNR2', 'NIFKP4', 'SRGAP1', 'RP1-34L19.1', 'KCNJ3', 'LRRC69', 'ABC7-42418200C9.1', 'RP11-93O17.2', 'MTHFD2P1', 'AC006509.7', 'RP4-569D19.5', 'LRRC37A', 'GBP1P1', 'PCDHB1', 'AC008686.1', 'RP11-43P5.1', 'RPSA…	ARCHS4 (coexpressed genes)	downregulated
HMX3_human_tf_ARCHS4_coexpression	-1.74959	51.3637	1.16029e-11	1.77884e-13	['HIST1H2BO', 'HIST1H2BJ', 'HIST1H3J', 'TAS2R20', 'HIST2H2AB', 'HIST2H4A', 'HIST1H1D', 'HIST1H3F', 'HIST1H2AE', 'BTLA', 'HIST1H1E', 'HIST1H2AD', 'HIST1H3G', 'HIST1H3H', 'HIST1H2AG', 'HIST3H2BA', 'HIST1H3I', 'HIST1H3B', 'HIST1H3C', 'HIST1H1B', 'HIST1H1C', 'HIST1H2AM', 'HIST1H2AL', 'RP1-34B20.21', 'HIST1H2AI', 'HIST1H2AK', 'HIST1H2AJ', 'HIST2H2BF', 'HIST2H3A', 'HIST1H4I', 'HIST1H2BH', 'HIST2H3D', '…	ARCHS4 (coexpressed genes)	downregulated
HMX2_human_tf_ARCHS4_coexpression	-1.67349	49.1298	1.16029e-11	1.77884e-13	['CBX5P1', 'HIST1H2BO', 'HIST1H2BJ', 'HIST1H3J', 'HIST2H2AB', 'HIST2H4A', 'HIST1H1D', 'HIST1H3F', 'HIST1H2AE', 'BTLA', 'HIST1H1E', 'HIST1H2AD', 'HIST1H3G', 'HIST1H3H', 'HIST1H2AG', 'HIST3H2BA', 'HIST1H3I', 'HIST1H3B', 'SLC18A1', 'HIST1H3C', 'HIST1H1B', 'HIST1H2AL', 'RP1-34B20.21', 'HIST1H2AI', 'HIST1H2AK', 'HIST1H2AJ', 'HIST2H2BF', 'HIST2H3A', 'HIST4H4', 'HIST1H4I', 'HIST1H2BH', 'HIST2H3D', 'HIST…	ARCHS4 (coexpressed genes)	downregulated
PRDM7_human_tf_ARCHS4_coexpression	-1.89443	52.4543	4.67054e-11	9.43872e-13	['SULT1C2P1', 'AL023806.1', 'RGSL1', 'LECT2', 'AC008072.1', 'EFCAB12', 'OLA1P3', 'CYP3A5', 'HTN1', 'AP002962.1', 'HTN3', 'RP11-749H20.3', 'RP1-76C18.1', 'RP1-274L7.4', 'PATE4', 'KYNU', 'RP11-646I6.3', 'AL365202.1', 'LDHAL6CP', 'RP11-453N18.1', 'PPIAL4G', 'RP11-536C10.3', 'BMS1P17', 'ABCA9', 'LHFPL5', 'OPRM1', 'POU5F2', 'SULT1B1', 'RPS4XP5', 'RP11-402K9.1', 'OR11A1', 'FSIP2', 'RP11-153M7.3']	ARCHS4 (coexpressed genes)	downregulated
ZNF471_human_tf_ARCHS4_coexpression	-1.8642	51.6174	4.67054e-11	9.43872e-13	['SULT1C2P1', 'AL023806.1', 'RGSL1', 'LECT2', 'AC008072.1', 'EFCAB12', 'OLA1P3', 'CYP3A5', 'HTN1', 'AP002962.1', 'HTN3', 'RP11-749H20.3', 'RP1-76C18.1', 'PATE4', 'KYNU', 'RP11-646I6.3', 'LDHAL6CP', 'RP11-453N18.1', 'PPIAL4G', 'RP11-536C10.3', 'ANKRD36C', 'BMS1P17', 'ABCA9', 'LHFPL5', 'RP11-381O7.3', 'OPRM1', 'POU5F2', 'SULT1B1', 'AL354822.1', 'RPS4XP5', 'OR11A1', 'FSIP2', 'RP11-153M7.3']	ARCHS4 (coexpressed genes)	downregulated
BPNT1_human_tf_ARCHS4_coexpression	-1.81886	50.3619	4.67054e-11	9.43872e-13	['RP11-484L7.1', 'GCM1', 'ETF1P2', 'KCNG4', 'HEPACAM', 'RP11-354K4.1', 'RP11-350G24.2', 'AC073065.3', 'RP11-113I24.1', 'KB-1980E6.2', 'FAM60DP', 'NUGGC', 'TNFSF13B', 'NEUROD1', 'HMGN1P14', 'EEF1A1P31', 'CNR2', 'NIFKP4', 'SRGAP1', 'RP1-34L19.1', 'KCNJ3', 'LRRC69', 'RP11-93O17.2', 'MTHFD2P1', 'RP4-569D19.5', 'GBP1P1', 'PCDHB1', 'AC008686.1', 'RP11-43P5.1', 'RPSAP48', 'RP11-358L22.2', 'MARCKSL1P2', …	ARCHS4 (coexpressed genes)	downregulated
ZNF780A_human_tf_ARCHS4_coexpression	-1.81798	50.3378	4.67054e-11	9.43872e-13	['SULT1C2P1', 'AL023806.1', 'LECT2', 'AC008072.1', 'EFCAB12', 'OLA1P3', 'CYP3A5', 'HTN1', 'BX004987.1', 'AP002962.1', 'HTN3', 'RP11-749H20.3', 'RP1-76C18.1', 'PATE4', 'KYNU', 'RP11-646I6.3', 'LDHAL6CP', 'RP11-453N18.1', 'PPIAL4G', 'RP11-536C10.3', 'BMS1P17', 'ABCA9', 'LHFPL5', 'OPRM1', 'POU5F2', 'SULT1B1', 'AL354822.1', 'RPS4XP5', 'PFN1P2', 'OR11A1', 'ANKRD20A8P', 'FSIP2', 'RP11-153M7.3']	ARCHS4 (coexpressed genes)	downregulated
ARID3A_human_tf_ARCHS4_coexpression	-1.78842	49.5191	4.67054e-11	9.43872e-13	['RP11-484L7.1', 'GCM1', 'KCNG4', 'HEPACAM', 'RP11-354K4.1', 'LRTM1', 'RP11-350G24.2', 'AC073065.3', 'KB-1980E6.2', 'RPS3AP46', 'FAM60DP', 'TNFSF13B', 'NEUROD1', 'HMGN1P14', 'EEF1A1P31', 'CNR2', 'NIFKP4', 'KCNJ3', 'LRRC69', 'ABC7-42418200C9.1', 'RP11-93O17.2', 'MTHFD2P1', 'AC006509.7', 'RP4-569D19.5', 'LRRC37A', 'GBP1P1', 'PCDHB1', 'AC008686.1', 'RP11-43P5.1', 'RPSAP48', 'RP11-358L22.2', 'MARCKSL…	ARCHS4 (coexpressed genes)	downregulated
MAFF_human_tf_ARCHS4_coexpression	-1.75516	48.5981	4.67054e-11	9.43872e-13	['HEPACAM', 'LRTM1', 'AC073065.3', 'RP11-113I24.1', 'FAM60DP', 'TNFSF13B', 'NEUROD1', 'HMGN1P14', 'EEF1A1P31', 'MROH7', 'FGF23', 'PPIAL4G', 'KCNJ3', 'LRRC69', 'PCDH9', 'RP11-93O17.2', 'SLC35G5', 'MTHFD2P1', 'TBR1', 'RP11-259G18.2', 'AC006509.7', 'PSG2', 'AC000367.1', 'RP4-569D19.5', 'LRRC37A', 'GBP1P1', 'HIST1H4B', 'PCDHB1', 'NPM1P40', 'RP11-43P5.1', 'RPSAP48', 'RP11-325O24.5', 'CTD-2062F14.2']	ARCHS4 (coexpressed genes)	downregulated
FOXP1_human_tf_ARCHS4_coexpression	-1.84817	51.1737	4.67054e-11	9.43872e-13	['RP11-484L7.1', 'KCNG4', 'HEPACAM', 'RP11-354K4.1', 'LRTM1', 'RP11-350G24.2', 'AC073065.3', 'RP11-113I24.1', 'KB-1980E6.2', 'FAM60DP', 'NUGGC', 'TNFSF13B', 'NEUROD1', 'HMGN1P14', 'EEF1A1P31', 'CNR2', 'NIFKP4', 'SRGAP1', 'KCNJ3', 'LRRC69', 'RP11-93O17.2', 'SLC35G5', 'MTHFD2P1', 'AC006509.7', 'RP4-569D19.5', 'GBP1P1', 'PCDHB1', 'AC008686.1', 'NPM1P40', 'RP11-43P5.1', 'RPSAP48', 'RP11-358L22.2', 'M…	ARCHS4 (coexpressed genes)	downregulated
ZNF638_human_tf_ARCHS4_coexpression	-1.56245	40.71	2.16809e-10	4.83476e-12	['SLC24A2', 'NRSN1', 'HIST2H2AA4', 'HIST2H2AB', 'AP000769.1', 'RNY4P13', 'BX004987.1', 'METTL12', 'HIST1H3A', 'TMEM107', 'PLCG2', 'HIST1H2AE', 'PRR26', 'HIST1H2AG', 'AMH', 'HIST1H2AB', 'FAM83A', 'ZNF483', 'TAS2R30', 'RP1-34B20.21', 'DST', 'PCDH9', 'PTCH2', 'WDR74', 'HIST2H2BF', 'HIST1H4B', 'FCGR2A', 'HIST4H4', 'PPEF2', 'HIST1H4E', 'ZNF354B', 'FSIP2']	ARCHS4 (coexpressed genes)	downregulated
MLLT3_human_tf_ARCHS4_coexpression	-1.88598	49.1396	2.16809e-10	4.83476e-12	['SLC24A2', 'RP11-484L7.1', 'GCM1', 'KCNG4', 'HEPACAM', 'RP11-354K4.1', 'RP11-350G24.2', 'AC073065.3', 'EFCAB12', 'RP11-113I24.1', 'KB-1980E6.2', 'FAM60DP', 'NUGGC', 'TNFSF13B', 'NEUROD1', 'HMGN1P14', 'CNR2', 'NIFKP4', 'SRGAP1', 'KCNJ3', 'LRRC69', 'ABC7-42418200C9.1', 'RP11-93O17.2', 'MTHFD2P1', 'AC006509.7', 'RP4-569D19.5', 'GBP1P1', 'PCDHB1', 'AC008686.1', 'RPSAP48', 'RP11-358L22.2', 'MARCKSL1P…	ARCHS4 (coexpressed genes)	downregulated
FOXD4L5_human_tf_ARCHS4_coexpression	-1.82365	47.5154	2.16809e-10	4.83476e-12	['SULT1C2P1', 'AL023806.1', 'RGSL1', 'LECT2', 'AC008072.1', 'EFCAB12', 'OLA1P3', 'CYP3A5', 'HTN1', 'BX004987.1', 'AP002962.1', 'HTN3', 'RP11-749H20.3', 'PATE4', 'KYNU', 'LDHAL6CP', 'RP11-453N18.1', 'PPIAL4G', 'RP11-536C10.3', 'BMS1P17', 'ABCA9', 'LHFPL5', 'RP11-381O7.3', 'OPRM1', 'POU5F2', 'SULT1B1', 'AL354822.1', 'RPS4XP5', 'OR11A1', 'ANKRD20A8P', 'FSIP2', 'RP11-153M7.3']	ARCHS4 (coexpressed genes)	downregulated
ATOH8_human_tf_ARCHS4_coexpression	-1.56039	43.2054	6.76284e-10	9.43872e-13	['RAMP3', 'HSPB6', 'EPAS1', 'HSPB2-C11ORF52', 'LRRC32', 'AQP1', 'ISLR', 'CYB5R3', 'RRAS', 'LDHD', 'CTSF', 'PAMR1', 'PRRX2', 'FN1', 'BGN', 'SHISA4', 'COPZ2', 'PCOLCE', 'SOD3', 'SORBS3', 'SMOC2', 'COL1A2', 'COL5A1', 'SMOC1', 'ADGRF5', 'MXRA8', 'SERPING1', 'ITGBL1', 'CD248', 'ZNF358', 'FMOD', 'GAS6', 'CRYAB']	ARCHS4 (coexpressed genes)	upregulated
TOX4_human_tf_ARCHS4_coexpression	-1.85322	45.3256	9.79352e-10	2.38866e-11	['RP11-484L7.1', 'GCM1', 'HEPACAM', 'RP11-627K11.3', 'RP11-354K4.1', 'LRTM1', 'RP11-350G24.2', 'RP11-113I24.1', 'KB-1980E6.2', 'GPR82', 'RPS3AP46', 'NUGGC', 'TNFSF13B', 'HMGN1P14', 'CNR2', 'NIFKP4', 'RP1-34L19.1', 'UBTFL11', 'RP11-687F6.4', 'ABC7-42418200C9.1', 'RP11-93O17.2', 'MTHFD2P1', 'AC006509.7', 'RP4-569D19.5', 'LRRC37A', 'GBP1P1', 'PCDHB1', 'RP11-43P5.1', 'SYCP3', 'RP11-358L22.2', 'MARCKS…	ARCHS4 (coexpressed genes)	downregulated
PRDM5_human_tf_ARCHS4_coexpression	-1.81042	44.2787	9.79352e-10	2.38866e-11	['SULT1C2P1', 'AL023806.1', 'RGSL1', 'LECT2', 'AC008072.1', 'EFCAB12', 'OLA1P3', 'HTN1', 'AP002962.1', 'HTN3', 'RP11-749H20.3', 'RP1-76C18.1', 'PATE4', 'KYNU', 'RP11-646I6.3', 'LDHAL6CP', 'RP11-453N18.1', 'PPIAL4G', 'ANKUB1', 'RP11-536C10.3', 'BMS1P17', 'ABCA9', 'LHFPL5', 'OPRM1', 'POU5F2', 'SULT1B1', 'RPS4XP5', 'PCDHB1', 'OR11A1', 'FSIP2', 'RP11-153M7.3']	ARCHS4 (coexpressed genes)	downregulated
ZNF233_human_tf_ARCHS4_coexpression	-1.94941	47.6781	9.79352e-10	2.38866e-11	['AC004980.9', 'AL023806.1', 'KCNG4', 'AC008072.1', 'AC073065.3', 'EFCAB12', 'OLA1P3', 'HTN1', 'NUGGC', 'AP002962.1', 'HTN3', 'RP11-749H20.3', 'RP1-76C18.1', 'RP1-274L7.4', 'PATE4', 'KYNU', 'RP11-646I6.3', 'LDHAL6CP', 'RP11-453N18.1', 'RP11-536C10.3', 'TAS2R31', 'ABCA9', 'LHFPL5', 'OPRM1', 'POU5F2', 'RPS4XP5', 'OR11A1', 'AC010287.1', 'SLC22A9', 'FSIP2', 'RP11-153M7.3']	ARCHS4 (coexpressed genes)	downregulated
OSR1_human_tf_ARCHS4_coexpression	-1.61804	42.1582	1.1547e-09	4.83476e-12	['ECM1', 'HSPB6', 'HTRA3', 'LRRC32', 'ISLR', 'CYB5R3', 'RRAS', 'CREB3L1', 'SMPD1', 'PAMR1', 'IGFBP5', 'IL1R1', 'FN1', 'BGN', 'COPZ2', 'PCOLCE', 'SOD3', 'SORBS3', 'COL1A1', 'COL3A1', 'COL1A2', 'COL5A1', 'AC104532.2', 'CERCAM', 'MXRA8', 'ITGBL1', 'SNAI2', 'CD248', 'FMOD', 'GAS6', 'VAMP5', 'KANK4']	ARCHS4 (coexpressed genes)	upregulated
OSR2_human_tf_ARCHS4_coexpression	-1.62066	42.2266	1.1547e-09	4.83476e-12	['IFITM3', 'ECM1', 'HTRA3', 'ISLR', 'CYB5R3', 'RRAS', 'CREB3L1', 'SMPD1', 'CTSF', 'PAMR1', 'IGFBP5', 'IL1R1', 'LUM', 'OSR1', 'PRRX2', 'FN1', 'COPZ2', 'PCOLCE', 'SOD3', 'SORBS3', 'COL1A1', 'SMOC2', 'COL1A2', 'COL5A1', 'CERCAM', 'MXRA8', 'SERPING1', 'ITGBL1', 'SNAI2', 'CD248', 'FMOD', 'GAS6']	ARCHS4 (coexpressed genes)	upregulated
FOXI1_human_tf_ARCHS4_coexpression	-1.62833	42.4263	1.1547e-09	4.83476e-12	['RAMP3', 'CRABP2', 'TACSTD2', 'HSPB1', 'KRT23', 'LYPD3', 'GATA3', 'VTCN1', 'PTH1R', 'CRIP1', 'RP11-295K3.1', 'MUC1', 'CRACR2B', 'CAPNS1', 'AGR2', 'EFHD1', 'S100A14', 'IRX3', 'FOXP4', 'RHOD', 'PAX2', 'FA2H', 'BCAM', 'KRT19', 'CLDN3', 'PPDPF', 'SCNN1B', 'PPP1R1B', 'INO80B-WBP1', 'VGLL1', 'TJP3', 'ATP6V1B1']	ARCHS4 (coexpressed genes)	upregulated
DLX3_human_tf_ARCHS4_coexpression	-1.63365	42.5649	1.1547e-09	4.83476e-12	['LGALS3BP', 'COL17A1', 'CLIC3', 'TACSTD2', 'IFI6', 'HSPB1', 'LYPD3', 'GATA3', 'VTCN1', 'CYP4F22', 'CST6', 'TRIM29', 'RBBP8NL', 'TFAP2A', 'CDSN', 'KRT34', 'GRHL3', 'TINCR', 'RHOD', 'CLDN4', 'BCAM', 'KRT19', 'CLDN3', 'GJB5', 'KRT14', 'LY6D', 'PKP1', 'SERINC2', 'XAGE2', 'PTGES', 'ATP6V1B1', 'LY6E']	ARCHS4 (coexpressed genes)	upregulated
NFATC4_human_tf_ARCHS4_coexpression	-1.57651	38.5579	4.27869e-09	2.38866e-11	['HTRA3', 'LRRC32', 'PTMS', 'ISLR', 'CYB5R3', 'RRAS', 'CREB3L1', 'PAMR1', 'IGFBP5', 'IL1R1', 'OSR1', 'PRRX2', 'FN1', 'BGN', 'NR2F1', 'COPZ2', 'PCOLCE', 'SOD3', 'SORBS3', 'COL1A1', 'COL3A1', 'COL1A2', 'COL5A1', 'CERCAM', 'MXRA8', 'ITGBL1', 'SNAI2', 'CD248', 'ZNF358', 'FMOD', 'GAS6']	ARCHS4 (coexpressed genes)	upregulated
CREB3L1_human_tf_ARCHS4_coexpression	-1.63495	39.9871	4.27869e-09	2.38866e-11	['ECM1', 'LRRC32', 'ISLR', 'CYB5R3', 'CSRP1', 'CAPNS1', 'RRAS', 'SMPD1', 'PAMR1', 'IGFBP5', 'IL1R1', 'OSR1', 'PRRX2', 'FN1', 'BGN', 'COPZ2', 'PCOLCE', 'SOD3', 'SORBS3', 'COL1A1', 'COL3A1', 'COL1A2', 'COL5A1', 'CDC42EP5', 'CERCAM', 'MXRA8', 'ITGBL1', 'SNAI2', 'TGFBI', 'GAS6', 'SERINC2']	ARCHS4 (coexpressed genes)	upregulated
KLF8_human_tf_ARCHS4_coexpression	-1.76158	40.3353	4.29471e-09	1.13727e-10	['SULT1C2P1', 'AL023806.1', 'LECT2', 'AC008072.1', 'EFCAB12', 'OLA1P3', 'HTN1', 'AP002962.1', 'HTN3', 'GRAMD4P3', 'RP11-749H20.3', 'RP1-274L7.4', 'PATE4', 'KYNU', 'RP11-646I6.3', 'LDHAL6CP', 'RP11-453N18.1', 'PPIAL4G', 'RP11-536C10.3', 'BMS1P17', 'ABCA9', 'LHFPL5', 'OPRM1', 'POU5F2', 'SULT1B1', 'RPS4XP5', 'RP11-402K9.1', 'OR11A1', 'FSIP2', 'RP11-153M7.3']	ARCHS4 (coexpressed genes)	downregulated
GON4L_human_tf_ARCHS4_coexpression	-1.79721	41.1512	4.29471e-09	1.13727e-10	['GCM1', 'HEPACAM', 'RP11-354K4.1', 'AC073065.3', 'RP11-113I24.1', 'CYP3A5', 'FAM60DP', 'TNFSF13B', 'HMGN1P14', 'DNM1P47', 'RP11-99A14.1', 'MROH7', 'FGF23', 'SRGAP1', 'PPIAL4G', 'RP1-34L19.1', 'KCNJ3', 'ENPP7P12', 'PCDH9', 'PSG2', 'RP4-569D19.5', 'LRRC37A', 'GBP1P1', 'PCDHB1', 'AC008686.1', 'NPM1P40', 'PFN1P2', 'RPSAP48', 'RP11-325O24.5', 'CTD-2062F14.2']	ARCHS4 (coexpressed genes)	downregulated
ZNF280D_human_tf_ARCHS4_coexpression	-1.82241	41.7281	4.29471e-09	1.13727e-10	['SULT1C2P1', 'AL023806.1', 'RGSL1', 'AC008072.1', 'EFCAB12', 'OLA1P3', 'CYP3A5', 'HTN1', 'NUGGC', 'AP002962.1', 'HTN3', 'RP11-749H20.3', 'PATE4', 'KYNU', 'RP11-646I6.3', 'LDHAL6CP', 'RP11-453N18.1', 'PPIAL4G', 'RP11-536C10.3', 'ANKRD36C', 'BMS1P17', 'ABCA9', 'LHFPL5', 'OPRM1', 'POU5F2', 'SULT1B1', 'RPS4XP5', 'OR11A1', 'FSIP2', 'RP11-153M7.3']	ARCHS4 (coexpressed genes)	downregulated
FOXD2_human_tf_ARCHS4_coexpression	-2.05053	43.8295	1.82457e-08	5.21307e-10	['RP11-484L7.1', 'GCM1', 'HEPACAM', 'RP11-354K4.1', 'LRTM1', 'RP11-113I24.1', 'KB-1980E6.2', 'RPS3AP46', 'FAM60DP', 'TNFSF13B', 'HMGN1P14', 'EEF1A1P31', 'NIFKP4', 'KCNJ3', 'UBTFL11', 'LRRC69', 'RP11-93O17.2', 'MTHFD2P1', 'AC006509.7', 'RP4-569D19.5', 'LRRC37A', 'GBP1P1', 'PCDHB1', 'AC008686.1', 'RP11-43P5.1', 'RPSAP48', 'RP11-358L22.2', 'MARCKSL1P2', 'CTD-2062F14.2']	ARCHS4 (coexpressed genes)	downregulated
NFX1_human_tf_ARCHS4_coexpression	-1.78732	38.2034	1.82457e-08	5.21307e-10	['SULT1C2P1', 'AL023806.1', 'LECT2', 'AC008072.1', 'EFCAB12', 'OLA1P3', 'CYP3A5', 'HTN1', 'AP002962.1', 'HTN3', 'RP11-749H20.3', 'PATE4', 'KYNU', 'RP11-646I6.3', 'SLC18A1', 'LDHAL6CP', 'RP11-453N18.1', 'PPIAL4G', 'RP11-536C10.3', 'BMS1P17', 'ABCA9', 'LHFPL5', 'OPRM1', 'POU5F2', 'SULT1B1', 'RPS4XP5', 'OR11A1', 'FSIP2', 'RP11-153M7.3']	ARCHS4 (coexpressed genes)	downregulated
ZC3H8_human_tf_ARCHS4_coexpression	-1.79812	38.4342	1.82457e-08	5.21307e-10	['CCNB3P1', 'RP11-484L7.1', 'KCNG4', 'OR7E94P', 'HEPACAM', 'RP11-354K4.1', 'LRTM1', 'AC073065.3', 'OLA1P3', 'KB-1980E6.2', 'FAM60DP', 'NUGGC', 'CNR2', 'NIFKP4', 'SRGAP1', 'PPIAL4G', 'RP1-34L19.1', 'KCNJ3', 'LRRC69', 'RP11-93O17.2', 'MTHFD2P1', 'AC006509.7', 'PSG2', 'RP4-569D19.5', 'PCDHB1', 'AC008686.1', 'NPM1P40', 'RPSAP48', 'RP11-325O24.5']	ARCHS4 (coexpressed genes)	downregulated
ZNF224_human_tf_ARCHS4_coexpression	-1.7704	35.2153	7.32892e-08	2.29827e-09	['SULT1C2P1', 'AL023806.1', 'LECT2', 'AC008072.1', 'EFCAB12', 'OLA1P3', 'HTN1', 'AP002962.1', 'HTN3', 'RP11-749H20.3', 'PATE4', 'KYNU', 'RP11-646I6.3', 'LDHAL6CP', 'RP11-453N18.1', 'RP11-536C10.3', 'BMS1P17', 'ABCA9', 'LHFPL5', 'OPRM1', 'POU5F2', 'SULT1B1', 'AL354822.1', 'RPS4XP5', 'ZPBP2', 'OR11A1', 'FSIP2', 'RP11-153M7.3']	ARCHS4 (coexpressed genes)	downregulated
ZNF302_human_tf_ARCHS4_coexpression	-1.8914	37.6221	7.32892e-08	2.29827e-09	['RP11-484L7.1', 'GCM1', 'HEPACAM', 'RP11-354K4.1', 'AC073065.3', 'RP11-113I24.1', 'FAM60DP', 'TNFSF13B', 'NEUROD1', 'HMGN1P14', 'FGF23', 'KCNJ3', 'LRRC69', 'RP11-93O17.2', 'MTHFD2P1', 'AC006509.7', 'PSG2', 'AC000367.1', 'RP4-569D19.5', 'LRRC37A', 'GBP1P1', 'PCDHB1', 'AC008686.1', 'NPM1P40', 'RPSAP48', 'RP11-325O24.5', 'RP11-358L22.2', 'CTD-2062F14.2']	ARCHS4 (coexpressed genes)	downregulated
MIXL1_human_tf_ARCHS4_coexpression	-1.82868	36.3744	7.32892e-08	2.29827e-09	['CCNB3P1', 'RP11-484L7.1', 'KCNG4', 'HEPACAM', 'RP11-217O12.1', 'RP11-354K4.1', 'LRTM1', 'AC073065.3', 'RP11-113I24.1', 'KB-1980E6.2', 'NUGGC', 'TNFSF13B', 'HMGN1P14', 'CNR2', 'NIFKP4', 'KCNJ3', 'LRRC69', 'RP11-93O17.2', 'MTHFD2P1', 'AC006509.7', 'AC000367.1', 'RP4-569D19.5', 'GBP1P1', 'PCDHB1', 'RPSAP48', 'RP11-358L22.2', 'MARCKSL1P2', 'RP11-153M7.3']	ARCHS4 (coexpressed genes)	downregulated
ZNF37A_human_tf_ARCHS4_coexpression	-1.78079	35.4219	7.32892e-08	2.29827e-09	['SULT1C2P1', 'AL023806.1', 'AC008072.1', 'EFCAB12', 'OLA1P3', 'CYP3A5', 'HTN1', 'AP002962.1', 'HTN3', 'RP11-749H20.3', 'PATE4', 'KYNU', 'RP11-646I6.3', 'LDHAL6CP', 'RP11-453N18.1', 'PPIAL4G', 'RP11-536C10.3', 'BMS1P17', 'ABCA9', 'LHFPL5', 'OPRM1', 'POU5F2', 'SULT1B1', 'AL354822.1', 'RPS4XP5', 'OR11A1', 'FSIP2', 'RP11-153M7.3']	ARCHS4 (coexpressed genes)	downregulated
SP6_human_tf_ARCHS4_coexpression	-1.59657	31.7575	2.19561e-07	2.29827e-09	['CRABP2', 'TACSTD2', 'IFI6', 'KRT23', 'LYPD3', 'VTCN1', 'WNT6', 'WNT11', 'MDK', 'TRIM29', 'RBBP8NL', 'UGT1A6', 'ODAM', 'IGF2', 'KRT7', 'GRHL3', 'TINCR', 'RHOD', 'CLDN4', 'BCAM', 'KRT19', 'TMEM54', 'VGLL1', 'XAGE2', 'KANK4', 'TJP3', 'PTGES', 'ATP6V1B1']	ARCHS4 (coexpressed genes)	upregulated
DSP_human_tf_ARCHS4_coexpression	-1.57815	31.3912	2.19561e-07	2.29827e-09	['COL17A1', 'LAMA3', 'TACSTD2', 'KRT23', 'LYPD3', 'CYP4F22', 'CST6', 'TRIM29', 'FABP5P7', 'RNF39', 'ITGB6', 'S100A14', 'KRT6A', 'TFAP2A', 'CDSN', 'LAMB3', 'GRHL3', 'KRT5', 'RHOD', 'BCAM', 'KRT19', 'C1ORF116', 'KRT17', 'GJB5', 'KRT14', 'LY6D', 'PKP1', 'SERINC2']	ARCHS4 (coexpressed genes)	upregulated
PRRX1_human_tf_ARCHS4_coexpression	-1.6019	31.8637	2.19561e-07	2.29827e-09	['HSPB6', 'HTRA3', 'LRRC32', 'ISLR', 'CREB3L1', 'PAMR1', 'IGFBP5', 'IL1R1', 'OSR1', 'PRRX2', 'FN1', 'BGN', 'COPZ2', 'PCOLCE', 'SOD3', 'COL1A1', 'SMOC2', 'COL3A1', 'COL1A2', 'COL5A1', 'FNDC1', 'CERCAM', 'MXRA8', 'ITGBL1', 'SNAI2', 'CD248', 'FMOD', 'GAS6']	ARCHS4 (coexpressed genes)	upregulated
PRRX2_human_tf_ARCHS4_coexpression	-1.60752	31.9753	2.19561e-07	2.29827e-09	['IFITM3', 'ECM1', 'LRRC32', 'ISLR', 'CYB5R3', 'RRAS', 'CREB3L1', 'SMPD1', 'PAMR1', 'IL1R1', 'LUM', 'IGFBP3', 'FN1', 'BGN', 'COPZ2', 'PCOLCE', 'SOD3', 'SORBS3', 'COL1A1', 'COL1A2', 'COL5A1', 'CERCAM', 'MXRA8', 'ITGBL1', 'SNAI2', 'CD248', 'TGFBI', 'GAS6']	ARCHS4 (coexpressed genes)	upregulated
OVOL1_human_tf_ARCHS4_coexpression	-1.57706	31.3695	2.19561e-07	2.29827e-09	['COL17A1', 'TACSTD2', 'KRT23', 'GATA3', 'CYP4F22', 'TRIM29', 'RNF39', 'S100A14', 'KRT6A', 'CDSN', 'GRHL3', 'TINCR', 'CNFN', 'RHOD', 'IL22RA1', 'CLDN4', 'KRT19', 'C1ORF116', 'CLDN3', 'TMEM54', 'KRT17', 'GJB5', 'KRT14', 'LY6D', 'PKP1', 'SERINC2', 'VGLL1', 'TJP3']	ARCHS4 (coexpressed genes)	upregulated
GRHL3_human_tf_ARCHS4_coexpression	-1.5425	30.6821	2.19561e-07	2.29827e-09	['COL17A1', 'SPRR3', 'ECM1', 'CRABP2', 'TACSTD2', 'KRT23', 'LYPD3', 'CYP4F22', 'TRIM29', 'FABP5P7', 'RNF39', 'S100A14', 'KRT6A', 'CDSN', 'TINCR', 'KRT5', 'CNFN', 'RHOD', 'CLDN4', 'KRT19', 'C1ORF116', 'KRT17', 'SCNN1B', 'GJB5', 'KRT14', 'LY6D', 'PKP1', 'RHCG']	ARCHS4 (coexpressed genes)	upregulated
TWIST1_human_tf_ARCHS4_coexpression	-1.53618	30.5564	2.19561e-07	2.29827e-09	['ECM1', 'HTRA3', 'LRRC32', 'ISLR', 'CYB5R3', 'RRAS', 'CREB3L1', 'PAMR1', 'IGFBP5', 'IL1R1', 'LUM', 'OSR1', 'PRRX2', 'FN1', 'BGN', 'COPZ2', 'PCOLCE', 'SOD3', 'COL1A1', 'COL3A1', 'COL1A2', 'COL5A1', 'MXRA8', 'ITGBL1', 'SNAI2', 'CD248', 'GAS6', 'PRRT4']	ARCHS4 (coexpressed genes)	upregulated
ZNF320_human_tf_ARCHS4_coexpression	-1.80788	33.351	2.91026e-07	9.73467e-09	['CCNB3P1', 'RP11-484L7.1', 'GCM1', 'RP11-354K4.1', 'LRTM1', 'RP11-350G24.2', 'AC073065.3', 'OLA1P3', 'RP11-113I24.1', 'KB-1980E6.2', 'NUGGC', 'RP11-507M3.1', 'GRAMD4P3', 'HMGN1P14', 'CNR2', 'NIFKP4', 'RP1-34L19.1', 'UBTFL11', 'ABC7-42418200C9.1', 'RP11-93O17.2', 'MTHFD2P1', 'AC006509.7', 'LRRC37A', 'GBP1P1', 'PCDHB1', 'AC008686.1', 'RP11-153M7.3']	ARCHS4 (coexpressed genes)	downregulated
SIX3_human_tf_ARCHS4_coexpression	-2.1164	39.0424	2.91026e-07	9.73467e-09	['CCNB3P1', 'RP11-484L7.1', 'GCM1', 'KCNG4', 'HEPACAM', 'RP11-354K4.1', 'AC073065.3', 'RP11-113I24.1', 'RPS3AP46', 'HMGN1P14', 'EEF1A1P31', 'NIFKP4', 'KCNJ3', 'RP11-93O17.2', 'MTHFD2P1', 'AC006509.7', 'RP4-569D19.5', 'LRRC37A', 'GBP1P1', 'PCDHB1', 'AC008686.1', 'NPM1P40', 'RPSAP48', 'RP11-325O24.5', 'RP11-358L22.2', 'MARCKSL1P2', 'CTD-2062F14.2']	ARCHS4 (coexpressed genes)	downregulated
ZNF621_human_tf_ARCHS4_coexpression	-1.79613	33.1343	2.91026e-07	9.73467e-09	['AL023806.1', 'AC008072.1', 'EFCAB12', 'OLA1P3', 'HTN1', 'AP002962.1', 'HTN3', 'GRAMD4P3', 'RP11-749H20.3', 'RP1-76C18.1', 'PATE4', 'KYNU', 'RP11-646I6.3', 'AL365202.1', 'SRGAP1', 'LDHAL6CP', 'RP11-453N18.1', 'RP11-536C10.3', 'ABCA9', 'LHFPL5', 'OPRM1', 'POU5F2', 'SULT1B1', 'RPS4XP5', 'OR11A1', 'FSIP2', 'RP11-153M7.3']	ARCHS4 (coexpressed genes)	downregulated
BARX2_human_tf_ARCHS4_coexpression	-1.56817	28.9289	8.71862e-07	9.73467e-09	['SPRR3', 'ECM1', 'CRABP2', 'TACSTD2', 'LYPD3', 'CYP4F22', 'CST6', 'WNT6', 'TRIM29', 'RNF39', 'S100A14', 'CDSN', 'GRHL3', 'TINCR', 'CNFN', 'IL22RA1', 'CLDN4', 'KRT19', 'C1ORF116', 'TMEM54', 'SCNN1B', 'KRT14', 'LY6D', 'PKP1', 'RHCG', 'TJP3', 'ATP6V1B1']	ARCHS4 (coexpressed genes)	upregulated
ZNF44_human_tf_ARCHS4_coexpression	-1.77005	30.1708	1.05152e-06	3.95692e-08	['AL023806.1', 'AC008072.1', 'EFCAB12', 'OLA1P3', 'HTN1', 'NUGGC', 'AP002962.1', 'HTN3', 'RP11-749H20.3', 'RP1-76C18.1', 'RP1-274L7.4', 'LDHAL6CP', 'RP11-453N18.1', 'PPIAL4G', 'RP11-536C10.3', 'BMS1P17', 'ABCA9', 'LHFPL5', 'POU5F2', 'RP11-131K17.1', 'SULT1B1', 'RPS4XP5', 'OR11A1', 'CCDC83', 'FSIP2', 'RP11-153M7.3']	ARCHS4 (coexpressed genes)	downregulated
ZNF667_human_tf_ARCHS4_coexpression	-1.72071	29.3299	1.05152e-06	3.95692e-08	['SULT1C2P1', 'AL023806.1', 'RGSL1', 'AC008072.1', 'EFCAB12', 'OLA1P3', 'HTN1', 'NUGGC', 'AP002962.1', 'HTN3', 'RP11-749H20.3', 'RP1-274L7.4', 'PATE4', 'RP11-646I6.3', 'LDHAL6CP', 'RP11-453N18.1', 'RP11-536C10.3', 'ABCA9', 'LHFPL5', 'OPRM1', 'POU5F2', 'RPS4XP5', 'RP11-402K9.1', 'OR11A1', 'FSIP2', 'RP11-153M7.3']	ARCHS4 (coexpressed genes)	downregulated
ZNF557_human_tf_ARCHS4_coexpression	-1.72162	29.3453	1.05152e-06	3.95692e-08	['RP11-484L7.1', 'GCM1', 'KCNG4', 'HEPACAM', 'RP11-354K4.1', 'LRTM1', 'AC073065.3', 'EFCAB12', 'RP11-113I24.1', 'KB-1980E6.2', 'NUGGC', 'TNFSF13B', 'METTL12', 'HMGN1P14', 'CNR2', 'NIFKP4', 'SRGAP1', 'RP1-34L19.1', 'RP11-93O17.2', 'MTHFD2P1', 'AC006509.7', 'PCDHB1', 'RPSAP48', 'RP11-358L22.2', 'MARCKSL1P2', 'RP11-153M7.3']	ARCHS4 (coexpressed genes)	downregulated
SSH1_human_tf_ARCHS4_coexpression	-1.62616	27.7183	1.05152e-06	3.95692e-08	['GCM1', 'HEPACAM', 'RP11-354K4.1', 'RP11-350G24.2', 'RP11-113I24.1', 'RPS3AP46', 'TNFSF13B', 'HMGN1P14', 'EEF1A1P31', 'NIFKP4', 'SRGAP1', 'KCNJ3', 'UBTFL11', 'CCBE1', 'ABC7-42418200C9.1', 'RP11-93O17.2', 'MTHFD2P1', 'RP4-569D19.5', 'LRRC37A', 'GBP1P1', 'PCDHB1', 'AC008686.1', 'RP11-43P5.1', 'SYCP3', 'RPSAP48', 'RP11-358L22.2']	ARCHS4 (coexpressed genes)	downregulated
BACH2_human_tf_ARCHS4_coexpression	-1.74359	29.7198	1.05152e-06	3.95692e-08	['RP11-484L7.1', 'GCM1', 'HEPACAM', 'RP11-354K4.1', 'LRTM1', 'RP11-113I24.1', 'NUGGC', 'TNFSF13B', 'HMGN1P14', 'CNR2', 'BTLA', 'SRGAP1', 'KCNJ3', 'FCRL3', 'RP11-93O17.2', 'SLC35G5', 'MTHFD2P1', 'AC006509.7', 'RP4-569D19.5', 'LRRC37A', 'GBP1P1', 'PCDHB1', 'AC008686.1', 'RPSAP48', 'MARCKSL1P2', 'CTD-2062F14.2']	ARCHS4 (coexpressed genes)	downregulated
ZNF26_human_tf_ARCHS4_coexpression	-1.68823	28.7763	1.05152e-06	3.95692e-08	['RP11-484L7.1', 'KCNG4', 'HEPACAM', 'AC073065.3', 'EFCAB12', 'OLA1P3', 'RP11-113I24.1', 'KB-1980E6.2', 'NUGGC', 'CNR2', 'KYNU', 'SRGAP1', 'PPIAL4G', 'RP1-34L19.1', 'KCNJ3', 'LRRC69', 'RP11-93O17.2', 'ABCA9', 'MTHFD2P1', 'AC006509.7', 'RP4-569D19.5', 'SULT1B1', 'PCDHB1', 'NPM1P40', 'FSIP2', 'RP11-153M7.3']	ARCHS4 (coexpressed genes)	downregulated
IRF6_human_tf_ARCHS4_coexpression	-1.48237	25.2674	3.15015e-06	3.95692e-08	['COL17A1', 'LAMA3', 'TACSTD2', 'KRT23', 'LYPD3', 'TRIM29', 'RNF39', 'ITGB6', 'S100A14', 'KRT6A', 'CDSN', 'LAMB3', 'GRHL3', 'KRT5', 'RHOD', 'CLDN4', 'KRT19', 'C1ORF116', 'TMEM54', 'GJB5', 'KRT14', 'LY6D', 'PKP1', 'RHCG', 'SERINC2', 'TJP3']	ARCHS4 (coexpressed genes)	upregulated
TCF21_human_tf_ARCHS4_coexpression	-1.63371	27.847	3.15015e-06	3.95692e-08	['HSPB6', 'EPAS1', 'HTRA3', 'LRRC32', 'AQP1', 'ISLR', 'CREB3L1', 'PAMR1', 'IGFBP5', 'IL1R1', 'OSR1', 'BGN', 'PCOLCE', 'SOD3', 'SORBS3', 'PAX2', 'COL3A1', 'BCAM', 'CDC42EP5', 'ADGRF5', 'MXRA8', 'SERPING1', 'SNAI2', 'CD248', 'FMOD', 'GAS6']	ARCHS4 (coexpressed genes)	upregulated
ZBTB20_human_tf_ARCHS4_coexpression	-1.66016	26.04	3.88112e-06	1.54163e-07	['RP11-484L7.1', 'OR7E94P', 'RP11-354K4.1', 'AC073065.3', 'EFCAB12', 'OLA1P3', 'RP11-113I24.1', 'GPR82', 'NUGGC', 'NEUROD1', 'GRAMD4P3', 'CNR2', 'SRGAP1', 'TAS2R50', 'ANKRD36C', 'ZNF483', 'ABC7-42418200C9.1', 'ABCA9', 'MTHFD2P1', 'AC006509.7', 'SULT1B1', 'GBP1P1', 'PCDHB1', 'FSIP2', 'RP11-153M7.3']	ARCHS4 (coexpressed genes)	downregulated
RHOXF2B_human_tf_ARCHS4_coexpression	-1.93854	30.4065	3.88112e-06	1.54163e-07	['RP11-484L7.1', 'GCM1', 'HEPACAM', 'RP11-354K4.1', 'LRTM1', 'RP11-113I24.1', 'RPS3AP46', 'TNFSF13B', 'HMGN1P14', 'CNR2', 'KCNJ3', 'LRRC69', 'CCBE1', 'RP11-93O17.2', 'MTHFD2P1', 'AC006509.7', 'RP4-569D19.5', 'GBP1P1', 'AC004386.4', 'PCDHB1', 'AC008686.1', 'SYCP3', 'RPSAP48', 'MARCKSL1P2', 'CTD-2062F14.2']	ARCHS4 (coexpressed genes)	downregulated
GATAD1_human_tf_ARCHS4_coexpression	-1.68674	26.457	3.88112e-06	1.54163e-07	['CCNB3P1', 'AL023806.1', 'OR7E94P', 'AC008072.1', 'AC073065.3', 'EFCAB12', 'OLA1P3', 'CYP3A5', 'HTN1', 'NUGGC', 'GRAMD4P3', 'RP11-749H20.3', 'CNR2', 'PATE4', 'KYNU', 'PPIAL4G', 'RP11-536C10.3', 'ABCA9', 'LHFPL5', 'POU5F2', 'SULT1B1', 'PCDHB1', 'OR11A1', 'FSIP2', 'RP11-153M7.3']	ARCHS4 (coexpressed genes)	downregulated
SNAI2_human_tf_ARCHS4_coexpression	-1.52655	23.9443	1.00416e-05	1.54163e-07	['COL17A1', 'HTRA3', 'LAMA3', 'LRRC32', 'ISLR', 'RRAS', 'CREB3L1', 'PAMR1', 'LAMB3', 'IL1R1', 'FN1', 'BGN', 'COPZ2', 'PCOLCE', 'KRT5', 'COL1A1', 'COL3A1', 'COL1A2', 'COL5A1', 'KRT14', 'MXRA8', 'ITGBL1', 'CD248', 'TGFBI', 'GAS6']	ARCHS4 (coexpressed genes)	upregulated
TP63_human_tf_ARCHS4_coexpression	-1.56516	24.5499	1.00416e-05	1.54163e-07	['COL17A1', 'LAMA3', 'TACSTD2', 'LYPD3', 'CST6', 'TRIM29', 'FABP5P7', 'ITGB6', 'S100A14', 'KRT6A', 'UGT1A6', 'TFAP2A', 'CDSN', 'LAMB3', 'GRHL3', 'KRT5', 'RHOD', 'C1ORF116', 'KRT17', 'GJB5', 'KRT14', 'LY6D', 'SNAI2', 'ACKR3', 'SERINC2']	ARCHS4 (coexpressed genes)	upregulated
GLIS2_human_tf_ARCHS4_coexpression	-1.53644	24.0994	1.00416e-05	1.54163e-07	['EPAS1', 'PTMS', 'ISLR', 'CYB5R3', 'CAPNS1', 'RRAS', 'CREB3L1', 'RPRML', 'FN1', 'BGN', 'PCOLCE', 'FOXP4', 'SOD3', 'SORBS3', 'COL1A1', 'COL1A2', 'COL5A1', 'PPDPF', 'SMOC1', 'MXRA8', 'ITGBL1', 'CD248', 'ZNF358', 'FMOD', 'GAS6']	ARCHS4 (coexpressed genes)	upregulated
RARG_human_tf_ARCHS4_coexpression	-1.55706	24.4229	1.00416e-05	1.54163e-07	['COL17A1', 'ECM1', 'CRABP2', 'TACSTD2', 'HSPB1', 'LYPD3', 'CYP4F22', 'CAPNS1', 'RRAS', 'TRIM29', 'CDSN', 'GRHL3', 'PCOLCE', 'KRT5', 'RHOD', 'KRT19', 'KRT17', 'GJB5', 'KRT14', 'MXRA8', 'LY6D', 'PKP1', 'CD248', 'GAS6', 'SERINC2']	ARCHS4 (coexpressed genes)	upregulated
ZNF429_human_tf_ARCHS4_coexpression	-1.76952	25.4262	1.11491e-05	5.74938e-07	['SULT1C2P1', 'AC004980.9', 'AL023806.1', 'BMS1P17', 'AC008072.1', 'ABCA9', 'LHFPL5', 'OPRM1', 'EFCAB12', 'OLA1P3', 'HTN1', 'NUGGC', 'POU5F2', 'AP002962.1', 'RP11-749H20.3', 'RP1-76C18.1', 'PATE4', 'RP11-646I6.3', 'OR11A1', 'LDHAL6CP', 'RP11-453N18.1', 'FSIP2', 'RP11-153M7.3', 'RP11-536C10.3']	ARCHS4 (coexpressed genes)	downregulated
SHPRH_human_tf_ARCHS4_coexpression	-1.75811	25.2623	1.11491e-05	5.74938e-07	['ANKRD36C', 'AL023806.1', 'AC008072.1', 'ABCA9', 'LHFPL5', 'AP000769.1', 'OPRM1', 'OLA1P3', 'HTN1', 'NUGGC', 'POU5F2', 'AP002962.1', 'HTN3', 'SULT1B1', 'RP11-749H20.3', 'KYNU', 'RP11-454F8.2', 'RP11-646I6.3', 'RP11-631M6.2', 'LDHAL6CP', 'RP11-453N18.1', 'FSIP2', 'RP11-153M7.3', 'RP11-536C10.3']	ARCHS4 (coexpressed genes)	downregulated
THAP6_human_tf_ARCHS4_coexpression	-1.89472	27.2252	1.11491e-05	5.74938e-07	['ZNF483', 'KCNG4', 'LHFPL5', 'MTHFD2P1', 'AC073065.3', 'OLA1P3', 'KB-1980E6.2', 'RP11-58E21.1', 'HTN1', 'NUGGC', 'POU5F2', 'AP002962.1', 'HTN3', 'BNIP3P37', 'RP11-749H20.3', 'PCDHB1', 'RP11-646I6.3', 'RP11-44D5.1', 'AL365202.1', 'LDHAL6CP', 'MARCKSL1P2', 'CTB-159G17.4', 'RP1-34L19.1', 'RP11-153M7.3']	ARCHS4 (coexpressed genes)	downregulated
ZNF268_human_tf_ARCHS4_coexpression	-1.75965	25.2844	1.11491e-05	5.74938e-07	['CCNB3P1', 'RP11-484L7.1', 'GCM1', 'KCNG4', 'RP11-93O17.2', 'RP11-354K4.1', 'LHFPL5', 'MTHFD2P1', 'AC073065.3', 'AC006509.7', 'EFCAB12', 'OLA1P3', 'RP11-113I24.1', 'KB-1980E6.2', 'NUGGC', 'LRRC37A', 'HMGN1P14', 'GBP1P1', 'CNR2', 'PCDHB1', 'AC008686.1', 'SRGAP1', 'RP1-34L19.1', 'RP11-153M7.3']	ARCHS4 (coexpressed genes)	downregulated
ONECUT3_human_tf_ARCHS4_coexpression	-1.797	25.8211	1.11491e-05	5.74938e-07	['CCNB3P1', 'RP11-484L7.1', 'WFDC11', 'KCNG4', 'HEPACAM', 'RP11-93O17.2', 'RP11-354K4.1', 'SLC35G5', 'MTHFD2P1', 'RP11-350G24.2', 'AC073065.3', 'RP11-113I24.1', 'KB-1980E6.2', 'NUGGC', 'TNFSF13B', 'GRAMD4P3', 'HMGN1P14', 'PCDHB1', 'AC008686.1', 'RP11-43P5.1', 'NIFKP4', 'SRGAP1', 'RP11-358L22.2', 'MARCKSL1P2']	ARCHS4 (coexpressed genes)	downregulated
ZNF527_human_tf_ARCHS4_coexpression	-1.78903	25.7066	1.11491e-05	5.74938e-07	['CCNB3P1', 'RP11-484L7.1', 'KCNG4', 'RP11-93O17.2', 'RP11-354K4.1', 'LRTM1', 'MTHFD2P1', 'AC073065.3', 'OPRM1', 'EFCAB12', 'OLA1P3', 'RP11-113I24.1', 'KB-1980E6.2', 'HTN1', 'NUGGC', 'CNR2', 'PCDHB1', 'RP11-646I6.3', 'ANKS4B', 'NIFKP4', 'SRGAP1', 'MARCKSL1P2', 'RP1-34L19.1', 'RP11-153M7.3']	ARCHS4 (coexpressed genes)	downregulated
PROX2_human_tf_ARCHS4_coexpression	-1.78138	25.5966	1.11491e-05	5.74938e-07	['SULT1C2P1', 'EIF3EP2', 'BMS1P17', 'AC008072.1', 'ABCA9', 'LHFPL5', 'OPRM1', 'OLA1P3', 'HTN1', 'AP002962.1', 'GRAMD4P3', 'SULT1B1', 'RP11-749H20.3', 'RP1-274L7.4', 'KYNU', 'ZPBP2', 'RP11-311B14.1', 'AC096921.2', 'ANKRD20A8P', 'LDHAL6CP', 'RP11-453N18.1', 'CCDC83', 'FSIP2', 'RP11-153M7.3']	ARCHS4 (coexpressed genes)	downregulated
ZNF519_human_tf_ARCHS4_coexpression	-1.77138	25.453	1.11491e-05	5.74938e-07	['AL023806.1', 'AC008072.1', 'ABCA9', 'LHFPL5', 'OPRM1', 'EFCAB12', 'OLA1P3', 'HTN1', 'POU5F2', 'AP002962.1', 'HTN3', 'SULT1B1', 'RP11-749H20.3', 'RPS4XP5', 'PATE4', 'KYNU', 'RP11-646I6.3', 'OR11A1', 'LDHAL6CP', 'RP11-453N18.1', 'PPIAL4G', 'FSIP2', 'RP11-153M7.3', 'RP11-536C10.3']	ARCHS4 (coexpressed genes)	downregulated
GPR155_human_tf_ARCHS4_coexpression	-1.73983	24.9996	1.11491e-05	5.74938e-07	['SLC24A2', 'CCNB3P1', 'ZNF483', 'AL023806.1', 'KCNG4', 'AC008072.1', 'ABCA9', 'LHFPL5', 'AC073065.3', 'EFCAB12', 'OLA1P3', 'KB-1980E6.2', 'HTN1', 'NUGGC', 'POU5F2', 'AP002962.1', 'RP11-749H20.3', 'RP1-274L7.4', 'PCDHB1', 'RP11-646I6.3', 'LDHAL6CP', 'MARCKSL1P2', 'FSIP2', 'RP11-153M7.3']	ARCHS4 (coexpressed genes)	downregulated
MEF2B_human_tf_ARCHS4_coexpression	-1.53834	22.1045	1.11491e-05	5.74938e-07	['HIST1H2AL', 'HIST1H2BO', 'RP1-34B20.21', 'HIST1H2AI', 'HIST1H3J', 'HIST1H2AK', 'CD180', 'HIST1H2AJ', 'HIST2H2AB', 'HIST2H2BF', 'HIST2H3A', 'HIST1H3F', 'BTLA', 'HIST1H1E', 'HIST1H3G', 'HIST1H3H', 'HIST1H4I', 'HIST1H2BH', 'HIST3H2BA', 'HIST1H4J', 'HIST2H3D', 'HIST1H3C', 'HIST2H3C', 'HIST1H2BC']	ARCHS4 (coexpressed genes)	downregulated
ZNF585A_human_tf_ARCHS4_coexpression	-1.75744	25.2526	1.11491e-05	5.74938e-07	['SULT1C2P1', 'AL023806.1', 'AC008072.1', 'ABCA9', 'LHFPL5', 'OPRM1', 'EFCAB12', 'OLA1P3', 'HTN1', 'POU5F2', 'AP002962.1', 'RP11-749H20.3', 'RP1-76C18.1', 'RPS4XP5', 'PATE4', 'KYNU', 'RP11-646I6.3', 'OR11A1', 'LDHAL6CP', 'RP11-453N18.1', 'PCDHA6', 'FSIP2', 'RP11-153M7.3', 'RP11-536C10.3']	ARCHS4 (coexpressed genes)	downregulated
POU6F2_human_tf_ARCHS4_coexpression	-1.7137	24.6242	1.11491e-05	5.74938e-07	['ZNF483', 'AL023806.1', 'KCNG4', 'AC008072.1', 'ABCA9', 'LHFPL5', 'AC002429.5', 'OPRM1', 'EFCAB12', 'OLA1P3', 'HTN1', 'NUGGC', 'HTN3', 'GRAMD4P3', 'RP11-749H20.3', 'RP1-76C18.1', 'PRR26', 'OR11A1', 'RP11-44D5.1', 'SRGAP1', 'RP11-722G7.1', 'FSIP2', 'RP11-153M7.3', 'RP11-536C10.3']	ARCHS4 (coexpressed genes)	downregulated
ZNF528_human_tf_ARCHS4_coexpression	-1.68587	24.2242	1.11491e-05	5.74938e-07	['RPL29P14', 'SULT1C2P1', 'AL023806.1', 'AC008072.1', 'ABCA9', 'LHFPL5', 'EFCAB12', 'OLA1P3', 'HTN1', 'POU5F2', 'AP002962.1', 'SULT1B1', 'RP11-749H20.3', 'RP1-76C18.1', 'RPS4XP5', 'PATE4', 'KYNU', 'RP11-646I6.3', 'OR11A1', 'LDHAL6CP', 'RP11-453N18.1', 'FSIP2', 'RP11-153M7.3', 'RP11-536C10.3']	ARCHS4 (coexpressed genes)	downregulated
ZNF773_human_tf_ARCHS4_coexpression	-1.72732	24.8198	1.11491e-05	5.74938e-07	['AL023806.1', 'KCNG4', 'AC008072.1', 'ABCA9', 'LHFPL5', 'AC073065.3', 'PCDHGB8P', 'EFCAB12', 'OLA1P3', 'KB-1980E6.2', 'HTN1', 'NUGGC', 'AP002962.1', 'HTN3', 'GRAMD4P3', 'RP11-749H20.3', 'RP1-76C18.1', 'PATE4', 'KYNU', 'OR11A1', 'LDHAL6CP', 'FSIP2', 'RP11-153M7.3', 'RP11-536C10.3']	ARCHS4 (coexpressed genes)	downregulated
PITX1_human_tf_ARCHS4_coexpression	-1.64789	23.6786	1.11491e-05	5.74938e-07	['LRRC69', 'RP11-484L7.1', 'GCM1', 'ABC7-42418200C9.1', 'HEPACAM', 'RP11-93O17.2', 'RP11-354K4.1', 'LRTM1', 'MTHFD2P1', 'AC006509.7', 'RP4-569D19.5', 'RP11-113I24.1', 'RPS3AP46', 'LRRC37A', 'HMGN1P14', 'GBP1P1', 'EEF1A1P31', 'PCDHB1', 'AC008686.1', 'RP11-43P5.1', 'RPSAP48', 'MARCKSL1P2', 'CTD-2062F14.2', 'KCNJ3']	ARCHS4 (coexpressed genes)	downregulated
ZNF611_human_tf_ARCHS4_coexpression	-1.7336	24.9101	1.11491e-05	5.74938e-07	['AL023806.1', 'KCNG4', 'AC008072.1', 'ABCA9', 'LHFPL5', 'AC073065.3', 'OPRM1', 'EFCAB12', 'OLA1P3', 'HTN1', 'NUGGC', 'POU5F2', 'RP11-749H20.3', 'RP1-76C18.1', 'RP1-274L7.4', 'PATE4', 'PCDHB1', 'OR11A1', 'AL365202.1', 'LDHAL6CP', 'PPIAL4G', 'FSIP2', 'RP11-153M7.3', 'RP11-536C10.3']	ARCHS4 (coexpressed genes)	downregulated
ZNF485_human_tf_ARCHS4_coexpression	-1.65718	23.812	1.11491e-05	5.74938e-07	['ZFHX3', 'OR7E94P', 'RP11-93O17.2', 'LRTM1', 'RP11-350G24.2', 'AC006509.7', 'AC000367.1', 'RP4-569D19.5', 'CYP4F11', 'RP11-113I24.1', 'RPS3AP46', 'AP002962.1', 'HTN3', 'HMGN1P14', 'RPS4XP5', 'RP11-402K9.1', 'PCDHB1', 'KYNU', 'HIST1H2AD', 'HIST1H3G', 'SIK1', 'HIST2H3D', 'RP11-453N18.1', 'RP11-153M7.3']	ARCHS4 (coexpressed genes)	downregulated
NELFE_K562_hg19	-1.81942	31.7701	2.10028e-05	2.60904e-08	['HIST1H2BO', 'HIST1H2BJ', 'HIST1H2BL', 'HIST2H2AB', 'HIST2H2AC', 'METTL12', 'HIST1H2AE', 'HIST1H1E', 'HIST1H2AD', 'HIST3H2BB', 'HIST1H3H', 'HIST1H2AG', 'HIST1H3B', 'HIST1H1C', 'HIST1H2AB', 'HIST1H2AM', 'HIST1H2AI', 'HIST1H2AH', 'ANKRD30BL', 'WDR74', 'HIST2H2BE', 'HIST1H4B', 'HIST1H2BF', 'HIST1H2BG', 'HIST1H4C', 'HIST1H4E', 'HIST1H2BD', 'HIST1H2BC']	ENCODE (experimentally validated targets)	downregulated
FOXF1_human_tf_ARCHS4_coexpression	-1.58308	22.7473	3.16879e-05	5.74938e-07	['ECM1', 'IGFBP5', 'IL1R1', 'EPAS1', 'MMP1', 'FN1', 'COPZ2', 'PCOLCE', 'COL1A1', 'COL3A1', 'COL1A2', 'CSRP1', 'COL5A1', 'ABLIM3', 'CREB3L1', 'SMPD1', 'SLCO2A1', 'MXRA8', 'SNAI2', 'CD248', 'TGFBI', 'GAS6', 'PAMR1', 'WLS']	ARCHS4 (coexpressed genes)	upregulated
FOXN1_human_tf_ARCHS4_coexpression	-1.53849	22.1066	3.16879e-05	5.74938e-07	['COL17A1', 'ECM1', 'CDSN', 'TACSTD2', 'KRT34', 'GRHL3', 'TINCR', 'KRT5', 'CNFN', 'CYP4F22', 'RHOD', 'CST6', 'FA2H', 'C1ORF116', 'KRT17', 'TRIM29', 'GJB5', 'KRT14', 'LY6D', 'RNF39', 'PKP1', 'S100A14', 'RHCG', 'KRT6A']	ARCHS4 (coexpressed genes)	upregulated
HAND1_human_tf_ARCHS4_coexpression	-1.52806	21.9567	3.16879e-05	5.74938e-07	['CRB2', 'LUM', 'IGFBP3', 'IGF2', 'GATA5', 'VTCN1', 'LRRC32', 'MRPL12', 'AQP1', 'PDLIM1', 'COL3A1', 'KRT19', 'WNT11', 'COL5A1', 'FRZB', 'MDK', 'CREB3L1', 'HAND2', 'PLSCR5', 'AC104532.2', 'RBPMS2', 'SNAI2', 'PRRT4', 'KANK4']	ARCHS4 (coexpressed genes)	upregulated
ZNF750_human_tf_ARCHS4_coexpression	-1.50683	21.6517	3.16879e-05	5.74938e-07	['COL17A1', 'SPRR3', 'ECM1', 'CDSN', 'TACSTD2', 'KRT23', 'GRHL3', 'TINCR', 'KRT5', 'CNFN', 'CYP4F22', 'CST6', 'FA2H', 'C1ORF116', 'KRT17', 'TRIM29', 'GJB5', 'KRT14', 'LY6D', 'RNF39', 'PKP1', 'S100A14', 'RHCG', 'KRT6A']	ARCHS4 (coexpressed genes)	upregulated
ZNF493_human_tf_ARCHS4_coexpression	-1.65126	21.6279	3.72305e-05	2.04962e-06	['RP11-484L7.1', 'GCM1', 'AL023806.1', 'OR7E94P', 'RP11-354K4.1', 'RP11-5N19.3', 'AC008072.1', 'ABCA9', 'LHFPL5', 'MTHFD2P1', 'EFCAB12', 'OLA1P3', 'HTN1', 'SULT1B1', 'BNIP3P37', 'PCDHB1', 'AC008686.1', 'RP11-646I6.3', 'RPSAP48', 'SRGAP1', 'PPIAL4G', 'FSIP2', 'RP11-153M7.3']	ARCHS4 (coexpressed genes)	downregulated
ZNF124_human_tf_ARCHS4_coexpression	-1.76053	23.0592	3.72305e-05	2.04962e-06	['SULT1C2P1', 'AL023806.1', 'AC008072.1', 'ABCA9', 'LHFPL5', 'OPRM1', 'EFCAB12', 'OLA1P3', 'HTN1', 'NUGGC', 'POU5F2', 'AP002962.1', 'RP11-749H20.3', 'RPS4XP5', 'KYNU', 'RP11-646I6.3', 'ENPP7P1', 'LDHAL6CP', 'RP11-453N18.1', 'CCDC83', 'FSIP2', 'RP11-153M7.3', 'RP11-536C10.3']	ARCHS4 (coexpressed genes)	downregulated
ZNF83_human_tf_ARCHS4_coexpression	-1.72642	22.6125	3.72305e-05	2.04962e-06	['RP11-484L7.1', 'SULT1C2P1', 'ANKRD36C', 'AL023806.1', 'AC008072.1', 'ABCA9', 'OLA1P3', 'HTN1', 'NUGGC', 'POU5F2', 'AP002962.1', 'GRAMD4P3', 'RP11-749H20.3', 'RP1-76C18.1', 'PATE4', 'PCDHB1', 'RP11-646I6.3', 'AL365202.1', 'LDHAL6CP', 'RP11-453N18.1', 'FSIP2', 'RP11-153M7.3', 'RP11-536C10.3']	ARCHS4 (coexpressed genes)	downregulated
ZNF530_human_tf_ARCHS4_coexpression	-1.72535	22.5983	3.72305e-05	2.04962e-06	['SULT1C2P1', 'AC004980.9', 'RP11-30L15.4', 'KCNG4', 'LRTM1', 'LHFPL5', 'AC004076.7', 'EFCAB12', 'OLA1P3', 'RP1-217P22.2', 'KB-1980E6.2', 'HTN1', 'RP11-749H20.3', 'RP1-76C18.1', 'RP11-497H16.7', 'RPS4XP5', 'PCDHB1', 'ZPBP2', 'GCSAML', 'AL365202.1', 'LDHAL6CP', 'RP11-453N18.1', 'RP11-805L22.2']	ARCHS4 (coexpressed genes)	downregulated
ZNF345_human_tf_ARCHS4_coexpression	-1.71026	22.4007	3.72305e-05	2.04962e-06	['CCNB3P1', 'AL023806.1', 'AC008072.1', 'ABCA9', 'LHFPL5', 'AC073065.3', 'OPRM1', 'EFCAB12', 'OLA1P3', 'KB-1980E6.2', 'HTN1', 'NUGGC', 'POU5F2', 'RP11-749H20.3', 'RPS4XP5', 'PCDHB1', 'RP11-646I6.3', 'OR11A1', 'AL365202.1', 'LDHAL6CP', 'FSIP2', 'RP11-153M7.3', 'RP11-536C10.3']	ARCHS4 (coexpressed genes)	downregulated
FBN1_human_tf_ARCHS4_coexpression	-1.5212	19.9244	0.00010128	2.04962e-06	['IL1R1', 'OSR1', 'PRRX2', 'FN1', 'BGN', 'COPZ2', 'PCOLCE', 'LRRC32', 'COL1A1', 'COL3A1', 'ISLR', 'COL1A2', 'COL5A1', 'RRAS', 'CREB3L1', 'CERCAM', 'MXRA8', 'ITGBL1', 'SNAI2', 'CD248', 'TGFBI', 'GAS6', 'PAMR1']	ARCHS4 (coexpressed genes)	upregulated
POU3F3_human_tf_ARCHS4_coexpression	-1.53214	20.0677	0.00010128	2.04962e-06	['CRB2', 'IRX1', 'CNTFR', 'BTBD17', 'TTYH1', 'ELAVL4', 'NR2F1', 'ATP1B2', 'DLK1', 'POU3F4', 'CLIP3', 'ARHGAP33', 'CACNG7', 'SOX1', 'PSD2', 'SMOC1', 'GDAP1L1', 'ZIC1', 'FXYD6', 'CTXN1', 'HES5', 'PRR36', 'LRRC4B']	ARCHS4 (coexpressed genes)	upregulated
TBX18_human_tf_ARCHS4_coexpression	-1.53847	20.1506	0.00010128	2.04962e-06	['OSR1', 'PRRX2', 'FN1', 'BGN', 'COPZ2', 'PCOLCE', 'LRRC32', 'SOD3', 'COL1A1', 'COL3A1', 'ISLR', 'COL1A2', 'COL5A1', 'RRAS', 'CREB3L1', 'ZNF703', 'MXRA8', 'ITGBL1', 'SNAI2', 'CD248', 'TGFBI', 'GAS6', 'PAMR1']	ARCHS4 (coexpressed genes)	upregulated
ZNF200_human_tf_ARCHS4_coexpression	-1.66616	19.7829	0.000109977	6.97414e-06	['CCNB3P1', 'GCM1', 'AL023806.1', 'AC008072.1', 'ABCA9', 'LHFPL5', 'AC073065.3', 'EFCAB12', 'OLA1P3', 'HTN1', 'RP11-507M3.1', 'AP002962.1', 'SULT1B1', 'BNIP3P37', 'RP11-749H20.3', 'KYNU', 'OR11A1', 'LDHAL6CP', 'PPIAL4G', 'FSIP2', 'RP11-153M7.3', 'RP11-536C10.3']	ARCHS4 (coexpressed genes)	downregulated
ZNF578_human_tf_ARCHS4_coexpression	-1.66721	19.7953	0.000109977	6.97414e-06	['RP11-484L7.1', 'GCM1', 'ABC7-42418200C9.1', 'RP11-93O17.2', 'RP11-354K4.1', 'CCDC168', 'MTHFD2P1', 'AC002429.5', 'RP11-113I24.1', 'KB-1980E6.2', 'RPS3AP46', 'HMGN1P14', 'GBP1P1', 'CNR2', 'PCDHB1', 'AC008686.1', 'RP11-43P5.1', 'RPSAP48', 'NIFKP4', 'RP1-34L19.1', 'CTD-2062F14.2', 'UBTFL11']	ARCHS4 (coexpressed genes)	downregulated
ZNF347_human_tf_ARCHS4_coexpression	-1.69382	20.1113	0.000109977	6.97414e-06	['AL023806.1', 'RP11-354K4.1', 'AC008072.1', 'ABCA9', 'LHFPL5', 'AC073065.3', 'EFCAB12', 'OLA1P3', 'KB-1980E6.2', 'GPR82', 'HTN1', 'GRAMD4P3', 'SULT1B1', 'RP11-749H20.3', 'CNR2', 'PCDHB1', 'SRGAP1', 'PPIAL4G', 'RP1-34L19.1', 'FSIP2', 'RP11-153M7.3', 'RP11-536C10.3']	ARCHS4 (coexpressed genes)	downregulated
ZNF717_human_tf_ARCHS4_coexpression	-1.70452	20.2383	0.000109977	6.97414e-06	['SULT1C2P1', 'AL023806.1', 'DST', 'BMS1P17', 'AC008072.1', 'RP11-420K10.1', 'ABCA9', 'RP11-381O7.3', 'OLA1P3', 'HTN1', 'BX004987.1', 'AP002962.1', 'AL354822.1', 'RP11-749H20.3', 'RP1-76C18.1', 'RPS4XP5', 'KYNU', 'ANKRD20A8P', 'LDHAL6CP', 'RP11-453N18.1', 'FSIP2', 'RP11-536C10.3']	ARCHS4 (coexpressed genes)	downregulated
TBX4_human_tf_ARCHS4_coexpression	-1.72176	20.443	0.000109977	6.97414e-06	['CCNB3P1', 'RP11-484L7.1', 'KCNG4', 'OR7E94P', 'KIAA1024L', 'LRTM1', 'AC006509.7', 'AC000367.1', 'CYP4F11', 'KB-1980E6.2', 'GPR82', 'NUGGC', 'AP002962.1', 'HTN3', 'HMGN1P14', 'RPS4XP5', 'RP11-402K9.1', 'CNR2', 'PCDHB1', 'KYNU', 'PBOV1', 'RP11-153M7.3']	ARCHS4 (coexpressed genes)	downregulated
ZNF555_human_tf_ARCHS4_coexpression	-1.73512	20.6016	0.000109977	6.97414e-06	['SULT1C2P1', 'ZNF483', 'AL023806.1', 'C9ORF131', 'AC008072.1', 'ABCA9', 'LHFPL5', 'OPRM1', 'EFCAB12', 'OLA1P3', 'GPR82', 'NUGGC', 'RP11-749H20.3', 'RP1-76C18.1', 'RP11-646I6.3', 'AC010287.1', 'AL365202.1', 'SRGAP1', 'LDHAL6CP', 'PBOV1', 'FSIP2', 'RP11-153M7.3']	ARCHS4 (coexpressed genes)	downregulated
TFAP4_human_tf_ARCHS4_coexpression	-1.74039	20.6642	0.000109977	6.97414e-06	['RP11-484L7.1', 'KCNG4', 'RP11-93O17.2', 'RP11-354K4.1', 'LHFPL5', 'MTHFD2P1', 'AC073065.3', 'OPRM1', 'EFCAB12', 'OLA1P3', 'RP11-58E21.1', 'NUGGC', 'GRAMD4P3', 'HMGN1P14', 'RP11-749H20.3', 'GBP1P1', 'CNR2', 'PCDHB1', 'RP11-646I6.3', 'PPIAL4G', 'RP1-34L19.1', 'RP11-153M7.3']	ARCHS4 (coexpressed genes)	downregulated
ZNF549_human_tf_ARCHS4_coexpression	-1.7459	20.7296	0.000109977	6.97414e-06	['SULT1C2P1', 'AL023806.1', 'OR7E94P', 'EIF3EP2', 'AC008072.1', 'ABCA9', 'LHFPL5', 'AC073065.3', 'OLA1P3', 'RP11-58E21.1', 'HTN1', 'NUGGC', 'POU5F2', 'RP11-749H20.3', 'RP1-274L7.4', 'RP11-646I6.3', 'AL365202.1', 'LDHAL6CP', 'RP11-453N18.1', 'FSIP2', 'RP11-153M7.3', 'RP11-536C10.3']	ARCHS4 (coexpressed genes)	downregulated
ZNF441_human_tf_ARCHS4_coexpression	-1.75521	20.8401	0.000109977	6.97414e-06	['SULT1C2P1', 'AL023806.1', 'TAS2R30', 'AC008072.1', 'ABCA9', 'LHFPL5', 'FAM217A', 'AC002429.5', 'OLA1P3', 'HTN1', 'POU5F2', 'AP002962.1', 'RP11-749H20.3', 'RPS4XP5', 'PATE4', 'IFNK', 'RP11-646I6.3', 'OR11A1', 'LDHAL6CP', 'RP11-453N18.1', 'FSIP2', 'RP11-536C10.3']	ARCHS4 (coexpressed genes)	downregulated
ZNF470_human_tf_ARCHS4_coexpression	-1.66464	19.7648	0.000109977	6.97414e-06	['AL023806.1', 'AC008072.1', 'ABCA9', 'LHFPL5', 'EFCAB12', 'OLA1P3', 'HTN1', 'POU5F2', 'AP002962.1', 'HTN3', 'SULT1B1', 'RP11-749H20.3', 'RPS4XP5', 'PATE4', 'KYNU', 'OR11A1', 'SRGAP1', 'LDHAL6CP', 'PPIAL4G', 'FSIP2', 'RP11-153M7.3', 'RP11-536C10.3']	ARCHS4 (coexpressed genes)	downregulated
ZNF684_human_tf_ARCHS4_coexpression	-1.9253	22.8597	0.000109977	6.97414e-06	['CCNB3P1', 'KCNG4', 'EIF3EP2', 'RP11-217O12.1', 'LHFPL5', 'AC002429.5', 'OLA1P3', 'RP1-217P22.2', 'KB-1980E6.2', 'RP11-58E21.1', 'GPR82', 'NUGGC', 'BNIP3P37', 'RP1-76C18.1', 'CNR2', 'PATE4', 'PCDHB1', 'RP11-646I6.3', 'AC010287.1', 'LDHAL6CP', 'PBOV1', 'RP1-34L19.1']	ARCHS4 (coexpressed genes)	downregulated
U2AF1L4_human_tf_ARCHS4_coexpression	-1.78989	21.2519	0.000109977	6.97414e-06	['CCNB3P1', 'GCM1', 'KCNG4', 'HEPACAM', 'RP11-93O17.2', 'RP11-354K4.1', 'LRTM1', 'MTHFD2P1', 'AC073065.3', 'RP11-113I24.1', 'KB-1980E6.2', 'NUGGC', 'TNFSF13B', 'GBP1P1', 'CNR2', 'AC008686.1', 'RP11-43P5.1', 'SLAMF6', 'NIFKP4', 'RP11-358L22.2', 'MARCKSL1P2', 'RP1-34L19.1']	ARCHS4 (coexpressed genes)	downregulated
CEBPB_GM12878_hg19	-1.90684	28.6406	0.000120695	2.99864e-07	['HIST1H2BM', 'HIST1H2BO', 'HIST1H2BJ', 'HIST1H3J', 'HIST1H2BI', 'CUL2', 'PTPN22', 'HIST2H2AC', 'TNFSF13B', 'HIST2H4A', 'HIST1H3F', 'HIST1H2AE', 'HIST1H2AD', 'HIST1H3G', 'HIST1H3H', 'HIST1H2AG', 'EIF2B1', 'HIST1H3B', 'HIST1H3C', 'HIST1H2AM', 'HIST1H2AI', 'HIST1H2AH', 'HIST1H2AJ', 'WDR74', 'LILRB1', 'HIST2H2BF', 'HIST2H2BE', 'HIST1H4B', 'HIST1H2BF', 'HIST1H4H', 'HIST1H4I', 'HIST1H2BH', 'HIST1H4J',…	ENCODE (experimentally validated targets)	downregulated
GRHL1_human_tf_ARCHS4_coexpression	-1.60243	19.0262	0.000249849	6.97414e-06	['SPRR3', 'CDSN', 'CMTM5', 'TACSTD2', 'KRT23', 'GRHL3', 'LYPD3', 'TINCR', 'CNFN', 'CYP4F22', 'CST6', 'C1ORF116', 'TRIM29', 'FABP5P7', 'GJB5', 'KRT14', 'LY6D', 'RNF39', 'PKP1', 'S100A14', 'RHCG', 'KRT6A']	ARCHS4 (coexpressed genes)	upregulated
NFIC_human_tf_ARCHS4_coexpression	-1.51588	17.9985	0.000249849	6.97414e-06	['LYNX1', 'HSPB6', 'EPAS1', 'BGN', 'SHISA4', 'COPZ2', 'PCOLCE', 'NR1D1', 'FOXP4', 'SOD3', 'SORBS3', 'SYT7', 'CYB5R3', 'CSRP1', 'CAPNS1', 'CREB3L1', 'TCEA3', 'LDHD', 'MXRA8', 'MAPRE3', 'CTSF', 'ZNF358']	ARCHS4 (coexpressed genes)	upregulated
SPDEF_human_tf_ARCHS4_coexpression	-1.52018	18.0496	0.000249849	6.97414e-06	['IRX3', 'TACSTD2', 'HSPB1', 'AC234582.1', 'GATA3', 'RHOD', 'SYT7', 'MUC1', 'CLDN4', 'BCAM', 'KRT19', 'C1ORF116', 'CLDN3', 'CRACR2B', 'TMEM54', 'CAPNS1', 'PPDPF', 'AGR2', 'EFHD1', 'AGR3', 'TJP3', 'RBBP8NL']	ARCHS4 (coexpressed genes)	upregulated
SCRT1_human_tf_ARCHS4_coexpression	-1.5454	18.349	0.000249849	6.97414e-06	['CNTFR', 'LINGO1', 'LYNX1', 'RAB3A', 'ATP1B2', 'TUBB4A', 'CLIP3', 'GPR162', 'CACNG7', 'PCSK1N', 'HRH3', 'PSD2', 'FAM131C', 'FAM163B', 'GDAP1L1', 'NPIPA3', 'GNG8', 'LHX5', 'MAPRE3', 'CTXN1', 'PRR36', 'LRRC4B']	ARCHS4 (coexpressed genes)	upregulated
EPAS1_human_tf_ARCHS4_coexpression	-1.56736	18.6097	0.000249849	6.97414e-06	['RAMP3', 'VWF', 'IL1R1', 'BGN', 'C8ORF4', 'LRRC32', 'SOD3', 'SORBS3', 'AQP1', 'C1ORF116', 'CYB5R3', 'CSRP1', 'RRAS', 'ABLIM3', 'SLCO2A1', 'ADGRF5', 'MXRA8', 'SERPING1', 'CD248', 'FMOD', 'GAS6', 'TGM2']	ARCHS4 (coexpressed genes)	upregulated
KRTAP5-1_human_tf_ARCHS4_coexpression	-1.56784	18.6155	0.000249849	6.97414e-06	['CDSN', 'IRX3', 'HSPB1', 'KRT34', 'AC234582.1', 'LYPD3', 'TINCR', 'GATA3', 'CYP4F22', 'CST6', 'RP11-295K3.1', 'FA2H', 'BCAM', 'OLFM2', 'CRACR2B', 'TRIM29', 'KRT14', 'LY6D', 'RNF39', 'PKP1', 'KRTAP2-3', 'PRR36']	ARCHS4 (coexpressed genes)	upregulated
TSHZ3_human_tf_ARCHS4_coexpression	-1.56815	18.6191	0.000249849	6.97414e-06	['IGFBP5', 'PEG3', 'IL1R1', 'PRRX2', 'FN1', 'BGN', 'PCOLCE', 'ADRA2A', 'COL1A1', 'COL3A1', 'ISLR', 'COL1A2', 'COL5A1', 'CREB3L1', 'SMPD1', 'MXRA8', 'ITGBL1', 'SNAI2', 'CD248', 'TGFBI', 'GAS6', 'PAMR1']	ARCHS4 (coexpressed genes)	upregulated
BNC1_human_tf_ARCHS4_coexpression	-1.56827	18.6206	0.000249849	6.97414e-06	['COL17A1', 'LAMB3', 'LAMA3', 'FN1', 'TACSTD2', 'KRT7', 'GRHL3', 'KRT5', 'RHOD', 'EPGN', 'C1ORF116', 'KRT17', 'TRIM29', 'GJB5', 'KRT14', 'PKP1', 'SNAI2', 'ITGB6', 'S100A14', 'SERINC2', 'KANK4', 'KRT6A']	ARCHS4 (coexpressed genes)	upregulated
ZSCAN18_human_tf_ARCHS4_coexpression	-1.59207	18.9031	0.000249849	6.97414e-06	['CNTFR', 'LINGO1', 'RAB3A', 'TTYH1', 'PTH1R', 'ATP1B2', 'TUBB4A', 'CLIP3', 'ARHGAP33', 'GPR162', 'CACNG7', 'PCSK1N', 'PSD2', 'GDAP1L1', 'ZIC1', 'NPIPA3', 'MAPRE3', 'FXYD6', 'CTXN1', 'HES5', 'PRR36', 'LRRC4B']	ARCHS4 (coexpressed genes)	upregulated
GLIS1_human_tf_ARCHS4_coexpression	-1.47577	17.5223	0.000249849	6.97414e-06	['PRRX2', 'FN1', 'BGN', 'COPZ2', 'PCOLCE', 'SORBS3', 'COL1A1', 'COL1A2', 'CYB5R3', 'CSRP1', 'COL5A1', 'RRAS', 'CREB3L1', 'SMPD1', 'CERCAM', 'MXRA8', 'ITGBL1', 'SNAI2', 'CD248', 'TGFBI', 'GAS6', 'PAMR1']	ARCHS4 (coexpressed genes)	upregulated
EHF_human_tf_ARCHS4_coexpression	-1.46874	17.4389	0.000249849	6.97414e-06	['TACSTD2', 'KRT23', 'GRHL3', 'LYPD3', 'CNFN', 'MUC1', 'CLDN4', 'KRT19', 'CLDN3', 'TMEM54', 'TRIM29', 'SCNN1B', 'LCN2', 'AGR2', 'LY6D', 'RNF39', 'PKP1', 'S100A14', 'RHCG', 'SERINC2', 'TJP3', 'KRT6A']	ARCHS4 (coexpressed genes)	upregulated
ZNF652_human_tf_ARCHS4_coexpression	-1.54477	16.5243	0.000321295	2.26138e-05	['RP11-484L7.1', 'ZNF483', 'ABC7-42418200C9.1', 'RP11-93O17.2', 'RP11-354K4.1', 'SLC30A4', 'MTHFD2P1', 'AP000769.1', 'OLA1P3', 'POU5F2', 'LRRC37A', 'NEUROD1', 'SULT1B1', 'HMGN1P14', 'GBP1P1', 'EEF1A1P31', 'PCDHB1', 'SYCP3', 'NIFKP4', 'SAMD12', 'RP11-358L22.2']	ARCHS4 (coexpressed genes)	downregulated
NEUROD1_human_tf_ARCHS4_coexpression	-1.55867	16.6731	0.000321295	2.26138e-05	['LRRC69', 'SLC24A2', 'RP11-484L7.1', 'GCM1', 'ABC7-42418200C9.1', 'HEPACAM', 'RP11-354K4.1', 'LRTM1', 'MTHFD2P1', 'AC073065.3', 'RP11-113I24.1', 'TNFSF13B', 'HMGN1P14', 'GBP1P1', 'PCDHB1', 'IAPP', 'RPSAP48', 'SAMD12', 'MARCKSL1P2', 'RP1-34L19.1', 'KCNJ3']	ARCHS4 (coexpressed genes)	downregulated
ZNF562_human_tf_ARCHS4_coexpression	-1.56575	16.7488	0.000321295	2.26138e-05	['AL023806.1', 'AC008072.1', 'ABCA9', 'LHFPL5', 'EFCAB12', 'OLA1P3', 'CYP3A5', 'HTN1', 'POU5F2', 'AP002962.1', 'SULT1B1', 'RP11-749H20.3', 'KYNU', 'OR11A1', 'SRGAP1', 'LDHAL6CP', 'RP11-453N18.1', 'PPIAL4G', 'FSIP2', 'RP11-153M7.3', 'RP11-536C10.3']	ARCHS4 (coexpressed genes)	downregulated
VSX1_human_tf_ARCHS4_coexpression	-1.70827	18.2732	0.000321295	2.26138e-05	['SULT1C2P1', 'KCNG4', 'OR7E94P', 'ABCA9', 'LHFPL5', 'AC073065.3', 'AC002429.5', 'OPRM1', 'OLA1P3', 'RP1-217P22.2', 'KB-1980E6.2', 'GPR82', 'NUGGC', 'POU5F2', 'RP11-749H20.3', 'PATE4', 'OR11A1', 'AL365202.1', 'SRGAP1', 'RP11-722G7.1', 'RP11-153M7.3']	ARCHS4 (coexpressed genes)	downregulated
ZNF426_human_tf_ARCHS4_coexpression	-1.65271	17.6789	0.000321295	2.26138e-05	['ZNF483', 'AL023806.1', 'RP11-217O12.1', 'AC008072.1', 'ABCA9', 'LHFPL5', 'AC073065.3', 'EFCAB12', 'OLA1P3', 'KB-1980E6.2', 'HTN1', 'NUGGC', 'RP11-749H20.3', 'CNR2', 'PATE4', 'PCDHB1', 'AL365202.1', 'SRGAP1', 'LDHAL6CP', 'RP11-153M7.3', 'RP11-536C10.3']	ARCHS4 (coexpressed genes)	downregulated
HOXA5_human_tf_ARCHS4_coexpression	-1.82615	19.5342	0.000321295	2.26138e-05	['P2RY12', 'RP11-484L7.1', 'CCBE1', 'RP11-93O17.2', 'RP11-354K4.1', 'LRTM1', 'MTHFD2P1', 'AC006509.7', 'RP4-569D19.5', 'RP11-113I24.1', 'HOXD10', 'RPS3AP46', 'TNFSF13B', 'HMGN1P14', 'GBP1P1', 'CNR2', 'PCDHB1', 'AC008686.1', 'RPSAP48', 'RP11-358L22.2', 'MARCKSL1P2']	ARCHS4 (coexpressed genes)	downregulated
ZNF486_human_tf_ARCHS4_coexpression	-1.68665	18.042	0.000321295	2.26138e-05	['CCNB3P1', 'AC008072.1', 'LHFPL5', 'AC073065.3', 'OPRM1', 'EFCAB12', 'OLA1P3', 'KB-1980E6.2', 'HTN1', 'NUGGC', 'POU5F2', 'RP11-749H20.3', 'ZNF729', 'RPS4XP5', 'PCDHB1', 'ZFP42', 'RP11-646I6.3', 'AL365202.1', 'LDHAL6CP', 'RP11-453N18.1', 'RP11-153M7.3']	ARCHS4 (coexpressed genes)	downregulated
ZNF430_human_tf_ARCHS4_coexpression	-1.70693	18.2589	0.000321295	2.26138e-05	['CCNB3P1', 'RP11-484L7.1', 'RAD17P2', 'KCNG4', 'EIF3EP2', 'LHFPL5', 'AC073065.3', 'OLA1P3', 'KB-1980E6.2', 'RP11-58E21.1', 'HTN1', 'NUGGC', 'AP002962.1', 'GRAMD4P3', 'CNR2', 'PCDHB1', 'RP11-646I6.3', 'AL365202.1', 'LDHAL6CP', 'RP1-34L19.1', 'RP11-153M7.3']	ARCHS4 (coexpressed genes)	downregulated
DEPDC5_human_tf_ARCHS4_coexpression	-1.61854	17.3135	0.000321295	2.26138e-05	['ANKRD36C', 'AL023806.1', 'FCRL3', 'CD180', 'AC008072.1', 'RP11-420K10.1', 'OLA1P3', 'HTN1', 'RP11-235E17.2', 'POU5F2', 'AP002962.1', 'AL354822.1', 'RP11-749H20.3', 'DNM1P47', 'KYNU', 'RP11-646I6.3', 'RP11-1070B7.3', 'LDHAL6CP', 'RP11-453N18.1', 'FSIP2', 'RP11-536C10.3']	ARCHS4 (coexpressed genes)	downregulated
ZNF442_human_tf_ARCHS4_coexpression	-1.75273	18.7488	0.000321295	2.26138e-05	['CCNB3P1', 'KCNG4', 'ABCA9', 'LHFPL5', 'AC073065.3', 'AP000769.1', 'EFCAB12', 'OLA1P3', 'HTN1', 'NUGGC', 'POU5F2', 'RP11-749H20.3', 'RP1-274L7.4', 'PCDHB1', 'RP11-646I6.3', 'AL365202.1', 'SRGAP1', 'LDHAL6CP', 'RP11-453N18.1', 'RP11-722G7.1', 'RP11-153M7.3']	ARCHS4 (coexpressed genes)	downregulated
MEIS3_human_tf_ARCHS4_coexpression	-1.56605	16.752	0.000648112	2.26138e-05	['CNTFR', 'LINGO1', 'TFAP2B', 'RAB3A', 'PTMS', 'CLIP3', 'ARHGAP33', 'CACNG7', 'OLFM2', 'PCSK1N', 'HRH3', 'PSD2', 'FAM163B', 'GDAP1L1', 'ZIC1', 'NPIPA3', 'MAPRE3', 'ZNF358', 'CTXN1', 'PRR36', 'LRRC4B']	ARCHS4 (coexpressed genes)	upregulated
KLF9_human_tf_ARCHS4_coexpression	-1.55227	16.6046	0.000648112	2.26138e-05	['LYNX1', 'MYBPC2', 'HSPB6', 'IL1R1', 'EPAS1', 'PGAM2', 'SHISA4', 'NR1D1', 'TUBB4A', 'MYOM2', 'AQP1', 'SMOC2', 'CSRP1', 'MB', 'TCEA3', 'TNNT3', 'LDHD', 'ADGRF5', 'SMYD1', 'CTSF', 'CRYAB']	ARCHS4 (coexpressed genes)	upregulated
GATA3_human_tf_ARCHS4_coexpression	-1.54209	16.4956	0.000648112	2.26138e-05	['TFAP2A', 'CRABP2', 'IRX3', 'TACSTD2', 'HSPB1', 'LYPD3', 'LDOC1', 'CYP4F22', 'RHOD', 'RP11-295K3.1', 'MUC1', 'CLDN4', 'BCAM', 'KRT19', 'CLDN3', 'CRACR2B', 'PPDPF', 'EFHD1', 'ACKR3', 'TJP3', 'RBBP8NL']	ARCHS4 (coexpressed genes)	upregulated
MEOX2_human_tf_ARCHS4_coexpression	-1.47733	15.803	0.000648112	2.26138e-05	['CRABP2', 'HSPB6', 'OSR1', 'BGN', 'NR2F1', 'PCOLCE', 'NR2F2', 'MEOX1', 'AQP1', 'PTMS', 'SMOC2', 'COL3A1', 'ISLR', 'COL5A1', 'FNDC1', 'QPCT', 'TNNT3', 'SLCO2A1', 'ALDH1A1', 'FMOD', 'KANK4']	ARCHS4 (coexpressed genes)	upregulated
TFAP2A_human_tf_ARCHS4_coexpression	-1.5157	16.2134	0.000648112	2.26138e-05	['LGALS3BP', 'COL17A1', 'LAMB3', 'IRX3', 'TACSTD2', 'HSPB1', 'LYPD3', 'TINCR', 'GATA3', 'VTCN1', 'NR2F2', 'RHOD', 'KRT17', 'TRIM29', 'ZNF703', 'PKP1', 'SNAI2', 'S100A14', 'SERINC2', 'FOLR1', 'PTGES']	ARCHS4 (coexpressed genes)	upregulated
MST1R_human_tf_ARCHS4_coexpression	-1.47644	15.7934	0.000648112	2.26138e-05	['LGALS3BP', 'COL17A1', 'FCGBP', 'LAMB3', 'TACSTD2', 'KRT7', 'MSLN', 'RHOD', 'IL22RA1', 'FA2H', 'MUC1', 'CLDN4', 'KRT19', 'C1ORF116', 'CLDN3', 'TMEM54', 'CDC42EP5', 'TRIM29', 'AGR2', 'SERINC2', 'TJP3']	ARCHS4 (coexpressed genes)	upregulated
OLIG1_human_tf_ARCHS4_coexpression	-1.42601	15.254	0.000648112	2.26138e-05	['LINGO1', 'LYNX1', 'TMEM132E', 'CMTM5', 'PLEKHB1', 'EBF4', 'ATP1B2', 'TUBB4A', 'CLIP3', 'GPR162', 'CACNG7', 'OLFM2', 'PCSK1N', 'PSD2', 'FAM163B', 'SMOC1', 'EFHD1', 'FXYD6', 'CTSF', 'CRYAB', 'LRRC4B']	ARCHS4 (coexpressed genes)	upregulated
NEUROG1_human_tf_ARCHS4_coexpression	-1.51956	16.2546	0.000648112	2.26138e-05	['TCP10L', 'PPP1R14A', 'LINGO1', 'AL034550.1', 'TMEM132E', 'BTBD17', 'WFIKKN1', 'CHRNA4', 'CABP7', 'ELAVL4', 'RTN4RL2', 'CBFA2T3', 'SYT7', 'PTMS', 'KIF19', 'HRH3', 'MDK', 'LHX5', 'RPRML', 'GFY', 'CTXN1']	ARCHS4 (coexpressed genes)	upregulated
FOXF2_human_tf_ARCHS4_coexpression	-1.59998	17.1149	0.000648112	2.26138e-05	['HTRA3', 'PRRX2', 'FN1', 'BGN', 'NR2F1', 'PCOLCE', 'NR2F2', 'LRRC32', 'SOD3', 'MT-ATP8', 'CYB5R3', 'RRAS', 'FRZB', 'ZNF703', 'MXRA8', 'CCL2', 'SNAI2', 'ZNF503', 'AC037459.4', 'CD248', 'PAMR1']	ARCHS4 (coexpressed genes)	upregulated
IRX5_human_tf_ARCHS4_coexpression	-1.69057	18.0839	0.000648112	2.26138e-05	['IRX1', 'TFAP2A', 'CNTFR', 'CRABP2', 'NPFF', 'TACSTD2', 'HSPB1', 'GATA3', 'VTCN1', 'RHOD', 'MUC1', 'CLDN4', 'BCAM', 'KRT19', 'CRACR2B', 'LMX1A', 'PPDPF', 'RNF39', 'NPIPA3', 'HES5', 'ATP6V1B1']	ARCHS4 (coexpressed genes)	upregulated
SUZ12_27294783_Chip-Seq_ESCs_Mouse	-1.47832	19.9663	0.000769915	1.36263e-06	['BARHL1', 'CPNE5', 'HPSE2', 'HSPB2', 'RAX', 'PTH1R', 'DUSP15', 'LRRC32', 'NRGN', 'CYP26B1', 'SIX6', 'SOX1', 'ANPEP', 'ZIC1', 'EFHD1', 'BAHCC1', 'KCNH2', 'LMO1', 'IGFBP5', 'IL1R1', 'IGFBP3', 'OSR1', 'MUM1L1', 'SHISA4', 'RTN4RL2', 'ATP1B2', 'DUSP26', 'CBFA2T3', 'PAX2', 'NR5A1', 'COL2A1', 'LMX1A', 'HAND2', 'HAND1', 'PKP1', 'ERP27', 'HOXB2', 'HOXB1', 'DPEP3', 'RBPJL', 'CRABP2', 'CHRNA4', 'EPAS1', 'C…	ChEA (experimentally validated targets)	upregulated
TRIM28_21343339_ChIP-Seq_HEK293_Human	-3.611	46.6664	0.000769915	2.4403e-06	['KRT19', 'SIX6', 'COL5A1', 'FNDC1', 'LUM', 'EPAS1', 'IRX3', 'IGFBP3', 'LDHD', 'C8ORF4', 'CRIP1', 'PTGES']	ChEA (experimentally validated targets)	upregulated
ZNF385C_human_tf_ARCHS4_coexpression	-1.79678	17.1961	0.000893735	6.97549e-05	['CCNB3P1', 'AL023806.1', 'KCNG4', 'ABCA9', 'LHFPL5', 'AC073065.3', 'OPRM1', 'EFCAB12', 'OLA1P3', 'HTN1', 'NUGGC', 'RP11-749H20.3', 'RP1-76C18.1', 'RP1-274L7.4', 'PCDHB1', 'MROH7', 'LDHAL6CP', 'PPIAL4G', 'RP11-153M7.3', 'RP11-536C10.3']	ARCHS4 (coexpressed genes)	downregulated
ZNF140_human_tf_ARCHS4_coexpression	-1.5599	14.9291	0.000893735	6.97549e-05	['AL023806.1', 'RP11-217O12.1', 'AC008072.1', 'AC004076.7', 'OPRM1', 'OLA1P3', 'CARF', 'RGPD1', 'HTN1', 'POU5F2', 'TATDN1P1', 'RP11-749H20.3', 'PATE4', 'ZPBP2', 'OR11A1', 'AL365202.1', 'LDHAL6CP', 'RP11-453N18.1', 'CCDC83', 'RP11-484D2.3']	ARCHS4 (coexpressed genes)	downregulated
MSX1_human_tf_ARCHS4_coexpression	-1.57603	15.0834	0.000893735	6.97549e-05	['LRRC69', 'CCNB3P1', 'RP11-381E24.4', 'HEPACAM', 'PSG2', 'RP4-613B23.5', 'RP4-569D19.5', 'KB-1980E6.2', 'FAM60DP', 'LRRC37A', 'RP11-507M3.1', 'GBP1P1', 'PCDHB1', 'AC008686.1', 'NPM1P40', 'RPSAP48', 'HIST1H4C', 'FGF23', 'PPIAL4G', 'KCNJ3']	ARCHS4 (coexpressed genes)	downregulated
ZNF675_human_tf_ARCHS4_coexpression	-1.58375	15.1573	0.000893735	6.97549e-05	['AL023806.1', 'OR7E94P', 'AC008072.1', 'ABCA9', 'LHFPL5', 'AC073065.3', 'EFCAB12', 'OLA1P3', 'GPR82', 'HTN1', 'NUGGC', 'RP11-507M3.1', 'FAR2P1', 'RP11-749H20.3', 'PCDHB1', 'OR11A1', 'LDHAL6CP', 'FSIP2', 'RP11-153M7.3', 'RP11-536C10.3']	ARCHS4 (coexpressed genes)	downregulated
ZNF382_human_tf_ARCHS4_coexpression	-1.64178	15.7127	0.000893735	6.97549e-05	['CCNB3P1', 'AL023806.1', 'KCNG4', 'OR7E94P', 'AC008072.1', 'ABCA9', 'LHFPL5', 'AC073065.3', 'EFCAB12', 'OLA1P3', 'KB-1980E6.2', 'HTN1', 'NUGGC', 'RP11-749H20.3', 'PCDHB1', 'AC010287.1', 'AL365202.1', 'LDHAL6CP', 'FSIP2', 'RP11-153M7.3']	ARCHS4 (coexpressed genes)	downregulated
ZNF419_human_tf_ARCHS4_coexpression	-1.66196	15.9058	0.000893735	6.97549e-05	['CCNB3P1', 'RP11-484L7.1', 'KCNG4', 'OR7E94P', 'HEPACAM', 'MTHFD2P1', 'AC073065.3', 'RP4-569D19.5', 'OLA1P3', 'KB-1980E6.2', 'GPR82', 'NUGGC', 'CNR2', 'PCDHB1', 'AC008686.1', 'NPM1P40', 'RP11-44D5.1', 'SRGAP1', 'RP1-34L19.1', 'KCNJ3']	ARCHS4 (coexpressed genes)	downregulated
ZNF19_human_tf_ARCHS4_coexpression	-1.66518	15.9367	0.000893735	6.97549e-05	['CCNB3P1', 'AL023806.1', 'AC008072.1', 'ABCA9', 'AC073065.3', 'EFCAB12', 'OLA1P3', 'HTN1', 'NUGGC', 'RP11-749H20.3', 'RP1-76C18.1', 'PATE4', 'PCDHB1', 'OR11A1', 'MROH7', 'PPIAL4G', 'RP1-34L19.1', 'FSIP2', 'RP11-153M7.3', 'RP11-536C10.3']	ARCHS4 (coexpressed genes)	downregulated
ZNF626_human_tf_ARCHS4_coexpression	-1.69703	16.2414	0.000893735	6.97549e-05	['CCNB3P1', 'KCNG4', 'RP11-217O12.1', 'ABCA9', 'LHFPL5', 'OPRM1', 'OLA1P3', 'KB-1980E6.2', 'GPR82', 'NUGGC', 'POU5F2', 'RP11-749H20.3', 'RP1-76C18.1', 'PCDHB1', 'RP11-646I6.3', 'AL365202.1', 'LDHAL6CP', 'RP11-722G7.1', 'RP1-34L19.1', 'RP11-153M7.3']	ARCHS4 (coexpressed genes)	downregulated
ZNF99_human_tf_ARCHS4_coexpression	-1.74773	16.7267	0.000893735	6.97549e-05	['CCNB3P1', 'RP11-484L7.1', 'KCNG4', 'OR7E94P', 'RP11-354K4.1', 'MTHFD2P1', 'AC073065.3', 'OPRM1', 'EFCAB12', 'OLA1P3', 'KB-1980E6.2', 'NUGGC', 'CNR2', 'PCDHB1', 'RP11-44D5.1', 'NIFKP4', 'SRGAP1', 'RP11-358L22.2', 'MARCKSL1P2', 'RP1-34L19.1']	ARCHS4 (coexpressed genes)	downregulated
ZNF250_human_tf_ARCHS4_coexpression	-1.75851	16.8298	0.000893735	6.97549e-05	['CCNB3P1', 'KCNG4', 'TAS2R31', 'AC008072.1', 'LHFPL5', 'AC073065.3', 'OLA1P3', 'RP1-217P22.2', 'KB-1980E6.2', 'CARF', 'NUGGC', 'RP11-749H20.3', 'RP1-76C18.1', 'RPS4XP5', 'PCDHB1', 'RP11-646I6.3', 'AL365202.1', 'SRGAP1', 'RP11-453N18.1', 'RP11-805L22.2']	ARCHS4 (coexpressed genes)	downregulated
SMAD2_human_tf_ARCHS4_coexpression	-1.56266	14.9555	0.000893735	6.97549e-05	['AL023806.1', 'AC008072.1', 'ABCA9', 'LHFPL5', 'AC073065.3', 'EFCAB12', 'OLA1P3', 'HTN1', 'POU5F2', 'AP002962.1', 'SULT1B1', 'RP11-749H20.3', 'RPS4XP5', 'KYNU', 'OR11A1', 'LDHAL6CP', 'RP11-453N18.1', 'FSIP2', 'RP11-153M7.3', 'RP11-536C10.3']	ARCHS4 (coexpressed genes)	downregulated
LARP6_human_tf_ARCHS4_coexpression	-1.50522	14.4058	0.00163867	6.97549e-05	['LYNX1', 'RAB3A', 'PLEKHB1', 'FN1', 'PCOLCE', 'TUBB4A', 'CLIP3', 'COL1A1', 'CACNG7', 'COL1A2', 'CSRP1', 'CREB3L1', 'CERCAM', 'MXRA8', 'ITGBL1', 'MAPRE3', 'CD248', 'NPTX1', 'GAS6', 'PAMR1']	ARCHS4 (coexpressed genes)	upregulated
PAX9_human_tf_ARCHS4_coexpression	-1.51408	14.4905	0.00163867	6.97549e-05	['SPRR3', 'ECM1', 'C2ORF40', 'TACSTD2', 'GRHL3', 'LYPD3', 'CNFN', 'RHOD', 'CACNG6', 'KRT19', 'C1ORF116', 'TRIM29', 'SCNN1B', 'LY6D', 'RNF39', 'PKP1', 'S100A14', 'RHCG', 'TJP3', 'CFAP77']	ARCHS4 (coexpressed genes)	upregulated
ZBTB7C_human_tf_ARCHS4_coexpression	-1.52806	14.6243	0.00163867	6.97549e-05	['FCGBP', 'C2ORF40', 'TACSTD2', 'LYPD3', 'CST6', 'CACNG6', 'FA2H', 'MUC1', 'CLDN4', 'CLDN3', 'KIF19', 'TMEM54', 'TRIM29', 'SCNN1B', 'AGR2', 'LY6D', 'AGR3', 'SERINC2', 'TJP3', 'CFAP77']	ARCHS4 (coexpressed genes)	upregulated
PLEK2_human_tf_ARCHS4_coexpression	-1.49888	14.3451	0.00163867	6.97549e-05	['LGALS3BP', 'COL17A1', 'LAMB3', 'LAMA3', 'KRT7', 'KRT5', 'RHOD', 'CST3', 'CLDN4', 'KRT19', 'ASTL', 'TMEM54', 'RRAS', 'KRT17', 'GJB5', 'KRT14', 'S100A6', 'S100A4', 'SERINC2', 'KRT6A']	ARCHS4 (coexpressed genes)	upregulated
HOXC8_human_tf_ARCHS4_coexpression	-1.54304	14.7677	0.00163867	6.97549e-05	['HSPB6', 'PRRX2', 'HSPB2-C11ORF52', 'FN1', 'SHISA4', 'COPZ2', 'PCOLCE', 'COL1A1', 'ISLR', 'COL1A2', 'CYB5R3', 'COL5A1', 'CREB3L1', 'ZNF703', 'CERCAM', 'MXRA8', 'ITGBL1', 'CD248', 'TGFBI', 'GAS6']	ARCHS4 (coexpressed genes)	upregulated
MEOX1_human_tf_ARCHS4_coexpression	-1.57252	15.0498	0.00163867	6.97549e-05	['TMEM132C', 'RAMP3', 'VWF', 'HSPB6', 'HTRA3', 'HSPB2-C11ORF52', 'LRRC32', 'SOD3', 'ADRA2A', 'AQP1', 'SMOC2', 'BCAM', 'ISLR', 'WNT11', 'CYB5R3', 'ABLIM3', 'PPDPF', 'FMOD', 'SERINC2', 'KANK4']	ARCHS4 (coexpressed genes)	upregulated
BARHL2_human_tf_ARCHS4_coexpression	-1.64102	15.7054	0.00163867	6.97549e-05	['CNTFR', 'LINGO1', 'CHRNA4', 'CABP7', 'ELAVL4', 'LDOC1', 'TUBB4A', 'CLIP3', 'ARHGAP33', 'GPR162', 'CACNG7', 'HRH3', 'FAM131C', 'GDAP1L1', 'ZIC1', 'GNG8', 'GFY', 'CTXN1', 'PRR36', 'LRRC4B']	ARCHS4 (coexpressed genes)	upregulated
FOXC2_human_tf_ARCHS4_coexpression	-1.47868	14.1517	0.00163867	6.97549e-05	['VWF', 'FN1', 'BGN', 'COPZ2', 'PCOLCE', 'LRRC32', 'COL1A1', 'COL1A2', 'CYB5R3', 'CSRP1', 'COL5A1', 'RRAS', 'CREB3L1', 'MXRA8', 'TIMP3', 'ITGBL1', 'SNAI2', 'CD248', 'TGFBI', 'GAS6']	ARCHS4 (coexpressed genes)	upregulated
KLF5_human_tf_ARCHS4_coexpression	-1.47246	14.0922	0.00163867	6.97549e-05	['COL17A1', 'FCGBP', 'TACSTD2', 'GRHL3', 'IL22RA1', 'CLDN4', 'KRT19', 'C1ORF116', 'CLDN3', 'TMEM54', 'CDC42EP5', 'TRIM29', 'ANPEP', 'AGR2', 'LY6D', 'PKP1', 'AGR3', 'S100A14', 'SERINC2', 'TJP3']	ARCHS4 (coexpressed genes)	upregulated
TBX5_human_tf_ARCHS4_coexpression	-1.49981	14.3539	0.00163867	6.97549e-05	['IFITM3', 'ECM1', 'IGFBP5', 'IL1R1', 'LUM', 'EPAS1', 'PRRX2', 'FN1', 'COPZ2', 'PCOLCE', 'COL1A1', 'COL3A1', 'COL1A2', 'COL5A1', 'CREB3L1', 'MXRA8', 'SNAI2', 'CD248', 'GAS6', 'PAMR1']	ARCHS4 (coexpressed genes)	upregulated
ZIC4_human_tf_ARCHS4_coexpression	-1.5418	14.7559	0.00163867	6.97549e-05	['CRB2', 'CNTFR', 'LINGO1', 'RAB3A', 'BTBD17', 'WFIKKN1', 'TTYH1', 'ATP1B2', 'TUBB4A', 'DLK1', 'CLIP3', 'GPR162', 'CACNG7', 'SOX1', 'MDK', 'MAPRE3', 'CTXN1', 'GALNT9', 'PRR36', 'LRRC4B']	ARCHS4 (coexpressed genes)	upregulated
STAT5A_K562_hg19	-1.91899	22.2045	0.00195453	9.43672e-06	['HIST1H2AM', 'HIST1H2BO', 'HIST1H2AI', 'HIST1H3J', 'HIST1H2BL', 'FABP5P3', 'CA1', 'HIST2H3A', 'HIST1H2AE', 'HIST1H1E', 'HIST1H3H', 'HIST1H4I', 'HIST1H2BG', 'HIST1H4C', 'HIST1H3B', 'HIST2H3C', 'HIST1H2BC', 'FAM83A']	ENCODE (experimentally validated targets)	downregulated
TAF7_K562_hg19	-1.76941	20.4228	0.00195453	9.71197e-06	['HIST1H2BN', 'HIST1H2BO', 'HIST1H2BJ', 'HIST1H3J', 'HIST1H2BL', 'HIST2H2AB', 'FABP5P3', 'CYP3A5', 'HIST2H2AC', 'METTL12', 'HIST1H1D', 'HIST1H3F', 'HIST1H2AE', 'HIST1H1E', 'HIST1H2AD', 'HIST1H3H', 'HIST1H2AG', 'EIF2B1', 'HIST1H3B', 'HIST1H1B', 'HIST1H1C', 'HIST1H2AB', 'HIST1H2AM', 'HIST1H2AL', 'HIST1H2AI', 'HIST1H2AH', 'ANKRD30BL', 'HIST1H2AK', 'WDR74', 'HIST2H2BE', 'HIST1H4B', 'HIST1H2BF', 'HIST…	ENCODE (experimentally validated targets)	downregulated
EZH2_27304074_Chip-Seq_ESCs_Mouse	-2.15281	24.3762	0.00234257	1.20918e-05	['RBPJL', 'HPSE2', 'TACSTD2', 'RAX', 'GATA5', 'WNT8B', 'LYPD3', 'GATA3', 'PTH1R', 'DUSP15', 'WNT6', 'HTR6', 'CYP26B1', 'WNT11', 'SOX1', 'PSD2', 'FRZB', 'SLITRK3', 'ZIC1', 'EFHD1', 'RPRML', 'NPTX1', 'LMO1', 'IRX1', 'TMEM132C', 'TMEM132E', 'IGFBP5', 'WNT3A', 'IRX3', 'OSR1', 'NR2F1', 'NR2F2', 'DLK1', 'PAX2', 'ADRA2A', 'NR5A1', 'OLFM2', 'COL2A1', 'LMX1A', 'HAND2', 'HAND1', 'PKP1', 'LHX5', 'HOXB2']	ChEA (experimentally validated targets)	upregulated
RNF2_27304074_Chip-Seq_ESCs_Mouse	-1.73627	19.0217	0.00234257	1.74621e-05	['BARHL1', 'HPSE2', 'RAX', 'HSPB1', 'DUSP15', 'CYP26B1', 'SIX6', 'SOX1', 'CSRP1', 'PSD2', 'CREB3L1', 'ZIC1', 'EFHD1', 'BAHCC1', 'LMO1', 'IGFBP5', 'IGFBP3', 'OSR1', 'RTN4RL2', 'ATP1B2', 'FOXP4', 'PAX2', 'ADRA2A', 'APBB1IP', 'NR5A1', 'OLFM2', 'COL2A1', 'LMX1A', 'HAND2', 'HAND1', 'PKP1', 'HOXB2', 'CRB2', 'CABP7', 'EPAS1', 'TACSTD2', 'GATA5', 'WNT8B', 'WNT6', 'WNT11', 'SLITRK3', 'GNG8', 'RPRML', 'NPT…	ChEA (experimentally validated targets)	upregulated
SUZ12_18692474_ChIP-Seq_MEFs_Mouse	-2.00975	21.895	0.00234257	1.85623e-05	['BARHL1', 'RAX', 'FGF3', 'HTR6', 'SIX6', 'SOX1', 'ZIC1', 'IGFBP5', 'EDN3', 'OSR1', 'DUSP26', 'PAX2', 'ADRA2A', 'POU3F4', 'NR5A1', 'COL2A1', 'HAND2', 'SLCO2A1', 'HAND1', 'PKP1', 'HOXB1', 'RHCG', 'GAS6', 'VAMP5', 'CHRNA4', 'EPAS1', 'CRABP1', 'TACSTD2', 'GATA5', 'GATA3', 'WNT6', 'WNT11', 'FRZB', 'NNAT', 'NPTX1', 'HES5', 'IRX1', 'WNT3A', 'IRX3', 'HTR1D', 'IGF2', 'NR2F1', 'NR2F2', 'SOD3', 'DLK1', 'GA…	ChEA (experimentally validated targets)	upregulated
ZC3H6_human_tf_ARCHS4_coexpression	-1.49439	12.6962	0.00234549	0.000204311	['CCNB3P1', 'ANKRD36C', 'ZNF483', 'KCNG4', 'ABCA9', 'AC073065.3', 'AP000769.1', 'AC006509.7', 'EFCAB12', 'OLA1P3', 'HTN1', 'AP002962.1', 'SULT1B1', 'RP11-749H20.3', 'PATE4', 'LDHAL6CP', 'PPIAL4G', 'FSIP2', 'RP11-153M7.3']	ARCHS4 (coexpressed genes)	downregulated
ZNF500_human_tf_ARCHS4_coexpression	-1.69085	14.3653	0.00234549	0.000204311	['CCNB3P1', 'RP11-484L7.1', 'KCNG4', 'LRTM1', 'MTHFD2P1', 'AC073065.3', 'AC006509.7', 'EFCAB12', 'OLA1P3', 'KB-1980E6.2', 'NUGGC', 'CNR2', 'PCDHB1', 'AC008686.1', 'RP11-44D5.1', 'NIFKP4', 'SRGAP1', 'MARCKSL1P2', 'RP11-153M7.3']	ARCHS4 (coexpressed genes)	downregulated
REL_human_tf_ARCHS4_coexpression	-1.51655	12.8844	0.00234549	0.000204311	['AL023806.1', 'AC008072.1', 'ABCA9', 'LHFPL5', 'AP000769.1', 'OLA1P3', 'CYP3A5', 'HTN1', 'POU5F2', 'AP002962.1', 'SULT1B1', 'RP11-749H20.3', 'KYNU', 'LDHAL6CP', 'RP11-453N18.1', 'PPIAL4G', 'FSIP2', 'RP11-153M7.3', 'RP11-536C10.3']	ARCHS4 (coexpressed genes)	downregulated
DR1_human_tf_ARCHS4_coexpression	-1.4247	12.1041	0.00234549	0.000204311	['GCM1', 'ABC7-42418200C9.1', 'RP11-93O17.2', 'RP11-354K4.1', 'RP11-64D22.1', 'MTHFD2P1', 'DAPP1', 'RP11-113I24.1', 'RPS3AP46', 'NUGGC', 'LRRC37A', 'HMGN1P14', 'GBP1P1', 'CNR2', 'PCDHB1', 'AC008686.1', 'RP11-43P5.1', 'NIFKP4', 'UBTFL11']	ARCHS4 (coexpressed genes)	downregulated
ZNF280B_human_tf_ARCHS4_coexpression	-1.53337	13.0273	0.00234549	0.000204311	['RP11-484L7.1', 'RP11-217O12.1', 'RP11-93O17.2', 'RP11-354K4.1', 'LRTM1', 'MTHFD2P1', 'AC073065.3', 'AC006509.7', 'RP4-569D19.5', 'RP11-113I24.1', 'FOXP2', 'NEUROD1', 'HMGN1P14', 'GBP1P1', 'CNR2', 'PCDHB1', 'IAPP', 'SYCP3', 'MARCKSL1P2']	ARCHS4 (coexpressed genes)	downregulated
SCAPER_human_tf_ARCHS4_coexpression	-1.55158	13.182	0.00234549	0.000204311	['ANKRD36C', 'ZNF483', 'RP1-37M3.8', 'KCNG4', 'LHFPL5', 'NDUFA9P1', 'OPRM1', 'OLA1P3', 'RP1-217P22.2', 'CARF', 'HTN1', 'AP002962.1', 'RP11-749H20.3', 'RP1-76C18.1', 'PATE4', 'RP11-646I6.3', 'RP11-631M6.2', 'AC159540.14', 'LDHAL6CP']	ARCHS4 (coexpressed genes)	downregulated
ZNF571_human_tf_ARCHS4_coexpression	-1.50377	12.7758	0.00234549	0.000204311	['CDCA4P4', 'SULT1C2P1', 'NMNAT1P3', 'AL023806.1', 'MAGEB17', 'PRDX3P4', 'LHFPL5', 'OLA1P3', 'RP11-122L4.2', 'HTN1', 'HNRNPA1P29', 'POU5F2', 'AP002962.1', 'RP11-749H20.3', 'ZPBP2', 'OR11A1', 'RP11-453N18.1', 'RP11-722G7.1', 'RP11-536C10.3']	ARCHS4 (coexpressed genes)	downregulated
ZNF100_human_tf_ARCHS4_coexpression	-1.57157	13.3519	0.00234549	0.000204311	['CCNB3P1', 'RP11-484L7.1', 'KCNG4', 'RP11-93O17.2', 'RP11-354K4.1', 'LHFPL5', 'MTHFD2P1', 'AC073065.3', 'AC006509.7', 'OLA1P3', 'KB-1980E6.2', 'RP11-58E21.1', 'NUGGC', 'RP11-749H20.3', 'CNR2', 'PCDHB1', 'RP11-646I6.3', 'AL365202.1', 'RP11-153M7.3']	ARCHS4 (coexpressed genes)	downregulated
ZNF660_human_tf_ARCHS4_coexpression	-1.58567	13.4716	0.00234549	0.000204311	['AC004980.9', 'ZNF483', 'KCNG4', 'RP11-217O12.1', 'ABCA9', 'LHFPL5', 'OPRM1', 'EFCAB12', 'OLA1P3', 'GPR82', 'HTN1', 'NUGGC', 'RP11-749H20.3', 'RP1-76C18.1', 'CNR2', 'PCDHB1', 'RP11-646I6.3', 'AL365202.1', 'RP11-153M7.3']	ARCHS4 (coexpressed genes)	downregulated
CRX_human_tf_ARCHS4_coexpression	-1.63513	13.8919	0.00234549	0.000204311	['CCNB3P1', 'RP11-484L7.1', 'AL023806.1', 'KCNG4', 'RP11-354K4.1', 'LRTM1', 'AC073065.3', 'EFCAB12', 'OLA1P3', 'KB-1980E6.2', 'CPLX4', 'NUGGC', 'HTN3', 'CNR2', 'PCDHB1', 'PDE6A', 'MARCKSL1P2', 'RP1-34L19.1', 'RP11-153M7.3']	ARCHS4 (coexpressed genes)	downregulated
ZNF529_human_tf_ARCHS4_coexpression	-1.66721	14.1644	0.00234549	0.000204311	['AC008072.1', 'ABCA9', 'LHFPL5', 'OPRM1', 'OLA1P3', 'KB-1980E6.2', 'HTN1', 'NUGGC', 'POU5F2', 'AP002962.1', 'RP11-749H20.3', 'PATE4', 'PCDHB1', 'RP11-646I6.3', 'LDHAL6CP', 'RP11-722G7.1', 'FSIP2', 'RP11-153M7.3', 'RP11-536C10.3']	ARCHS4 (coexpressed genes)	downregulated
ZFP14_human_tf_ARCHS4_coexpression	-1.68529	14.318	0.00234549	0.000204311	['CCNB3P1', 'KCNG4', 'OR7E94P', 'EIF3EP2', 'AC073065.3', 'OPRM1', 'EFCAB12', 'OLA1P3', 'KB-1980E6.2', 'GPR82', 'NUGGC', 'RP1-76C18.1', 'PCDHB1', 'SRGAP1', 'LDHAL6CP', 'PBOV1', 'RP1-34L19.1', 'FSIP2', 'RP11-153M7.3']	ARCHS4 (coexpressed genes)	downregulated
ZNF568_human_tf_ARCHS4_coexpression	-1.68828	14.3434	0.00234549	0.000204311	['RP11-484L7.1', 'KCNG4', 'EIF3EP2', 'ABCA9', 'LHFPL5', 'AC073065.3', 'OPRM1', 'OLA1P3', 'RP1-217P22.2', 'KB-1980E6.2', 'RP11-58E21.1', 'HTN1', 'NUGGC', 'POU5F2', 'RP11-749H20.3', 'PCDHB1', 'AL365202.1', 'LDHAL6CP', 'MARCKSL1P2']	ARCHS4 (coexpressed genes)	downregulated
EZH2_27294783_Chip-Seq_ESCs_Mouse	-1.50325	15.7853	0.0028936	2.75144e-05	['BARHL1', 'FCGBP', 'RAB3A', 'CPNE5', 'HPSE2', 'DPYS', 'RAX', 'HSPB1', 'PTH1R', 'DUSP15', 'LRRC32', 'CYP26B1', 'SIX6', 'SOX1', 'CREB3L1', 'ZIC1', 'EFHD1', 'TIMP3', 'WLS', 'LMO1', 'IGFBP5', 'IGFBP3', 'OSR1', 'RTN4RL2', 'PAX2', 'ADRA2A', 'APBB1IP', 'NR5A1', 'COL2A1', 'LMX1A', 'HAND2', 'HAND1', 'HOXB2', 'HOXB1', 'CRB2', 'RBPJL', 'CABP7', 'EPAS1', 'TACSTD2', 'WNT8B', 'LYPD3', 'GATA3', 'CACNG6', 'WNT6…	ChEA (experimentally validated targets)	upregulated
EZH2_B cell_hg19	-1.63139	20.0018	0.00383998	4.73487e-06	['CNTFR', 'C2ORF40', 'CPNE5', 'HSPB6', 'DUSP15', 'LRRC32', 'MYOM2', 'PTMS', 'HTR6', 'PSD2', 'MDK', 'CREB3L1', 'ANPEP', 'RBPMS2', 'TIMP3', 'MADCAM1', 'BAHCC1', 'KCNH2', 'LMO1', 'IGFBP5', 'FOXH1', 'SHISA4', 'COPZ2', 'RTN4RL2', 'EBF4', 'ATP1B2', 'DUSP26', 'ADRA2A', 'OLFM2', 'CLDN3', 'COL2A1', 'FNDC1', 'HAND1', 'CERCAM', 'RHCG', 'GAS6', 'CRABP2', 'TTYH1', 'CABP7', 'CRABP1', 'LAMA3', 'GATA5', 'NOXO1',…	ENCODE (experimentally validated targets)	upregulated
PITX1_human_tf_ARCHS4_coexpression	-1.63101	13.8568	0.00401065	0.000204311	['SPRR3', 'ECM1', 'TACSTD2', 'GRHL3', 'LYPD3', 'CNFN', 'MRPL12', 'RHOD', 'SRM', 'KRT19', 'C1ORF116', 'TRIM29', 'PPDPF', 'LY6D', 'RNF39', 'S100A14', 'RHCG', 'SERINC2', 'PTGES']	ARCHS4 (coexpressed genes)	upregulated
IRX3_human_tf_ARCHS4_coexpression	-1.47661	12.5451	0.00401065	0.000204311	['TFAP2A', 'TFAP2B', 'TACSTD2', 'HSPB1', 'GATA3', 'VTCN1', 'DUSP26', 'GADD45G', 'RP11-295K3.1', 'CACNG6', 'MUC1', 'CLDN4', 'BCAM', 'KRT19', 'CLDN3', 'CRACR2B', 'PPDPF', 'AGR3', 'TJP3']	ARCHS4 (coexpressed genes)	upregulated
SOX2_human_tf_ARCHS4_coexpression	-1.47062	12.4942	0.00401065	0.000204311	['CRB2', 'IRX1', 'TMEM132C', 'TTYH1', 'NR2F1', 'NR2F2', 'ATP1B2', 'RPS4Y1', 'MT-ATP8', 'POU3F4', 'CACNG7', 'SOX1', 'MDK', 'SMOC1', 'ZIC1', 'RBPMS2', 'SRY', 'CTXN1', 'LRRC4B']	ARCHS4 (coexpressed genes)	upregulated
TBX3_human_tf_ARCHS4_coexpression	-1.45477	12.3595	0.00401065	0.000204311	['IGFBP5', 'IL1R1', 'EPAS1', 'FN1', 'PCOLCE', 'COL1A1', 'BCAM', 'C1ORF116', 'COL1A2', 'CSRP1', 'COL5A1', 'CAPNS1', 'CREB3L1', 'MXRA8', 'SNAI2', 'CD248', 'GAS6', 'SERINC2', 'PAMR1']	ARCHS4 (coexpressed genes)	upregulated
MKX_human_tf_ARCHS4_coexpression	-1.44516	12.2779	0.00401065	0.000204311	['IGFBP5', 'IGFBP3', 'PRRX2', 'FN1', 'COPZ2', 'KRT34', 'PCOLCE', 'COL1A1', 'COL1A2', 'COL5A1', 'RRAS', 'PSG4', 'CREB3L1', 'CERCAM', 'MXRA8', 'ITGBL1', 'CD248', 'GAS6', 'PAMR1']	ARCHS4 (coexpressed genes)	upregulated
RAPGEF3_human_tf_ARCHS4_coexpression	-1.44327	12.2618	0.00401065	0.000204311	['LYNX1', 'RAMP3', 'VWF', 'HSPB6', 'EPAS1', 'PLEKHB1', 'SORBS3', 'AQP1', 'FA2H', 'SMOC2', 'BCAM', 'CSRP1', 'ADGRF5', 'CERCAM', 'EFHD1', 'CTSF', 'ZNF358', 'FMOD', 'CRYAB']	ARCHS4 (coexpressed genes)	upregulated
SOX8_human_tf_ARCHS4_coexpression	-1.4214	12.076	0.00401065	0.000204311	['CNTFR', 'LINGO1', 'TMEM132E', 'TTYH1', 'CMTM5', 'PLEKHB1', 'EBF4', 'ATP1B2', 'CLIP3', 'GPR162', 'CACNG7', 'OLFM2', 'PCSK1N', 'PSD2', 'SMOC1', 'EFHD1', 'FXYD6', 'CRYAB', 'LRRC4B']	ARCHS4 (coexpressed genes)	upregulated
SOX1_human_tf_ARCHS4_coexpression	-1.41373	12.0109	0.00401065	0.000204311	['CRB2', 'IRX1', 'CNTFR', 'BTBD17', 'TTYH1', 'NR2F1', 'DLK1', 'POU3F4', 'ARHGAP33', 'CACNG7', 'COL2A1', 'MDK', 'PPDPF', 'SMOC1', 'ZIC1', 'FXYD6', 'HES5', 'PRR36', 'LRRC4B']	ARCHS4 (coexpressed genes)	upregulated
NR2F1_human_tf_ARCHS4_coexpression	-1.47662	12.5452	0.00401065	0.000204311	['CRB2', 'IRX1', 'CNTFR', 'TTYH1', 'NR2F2', 'ATP1B2', 'PTMS', 'POU3F4', 'CLIP3', 'CACNG7', 'SOX1', 'LMX1A', 'NNAT', 'ZIC1', 'ZNF503', 'HES5', 'PRR36', 'WLS', 'LRRC4B']	ARCHS4 (coexpressed genes)	upregulated
GBX2_human_tf_ARCHS4_coexpression	-1.40443	11.9318	0.00401065	0.000204311	['BARHL1', 'CRB2', 'IRX1', 'CNTFR', 'BTBD17', 'TTYH1', 'CRABP1', 'NR2F1', 'PTMS', 'POU3F4', 'CACNG7', 'ZNF80', 'COL1A2', 'SOX1', 'MDK', 'ZIC1', 'ZNF358', 'WLS', 'LRRC4B']	ARCHS4 (coexpressed genes)	upregulated
HES5_human_tf_ARCHS4_coexpression	-1.81708	15.4377	0.00401065	0.000204311	['CRB2', 'IRX1', 'CNTFR', 'BTBD17', 'TTYH1', 'NR2F1', 'NR2F2', 'PTH1R', 'DLK1', 'CTB-63M22.1', 'POU3F4', 'SOX1', 'COL2A1', 'MDK', 'PPDPF', 'ZIC1', 'RPRML', 'CTXN1', 'LRRC4B']	ARCHS4 (coexpressed genes)	upregulated
NR1D1_human_tf_ARCHS4_coexpression	-1.39362	11.84	0.00401065	0.000204311	['RBPJL', 'LYNX1', 'RAB3A', 'KLK1', 'PLEKHB1', 'SHISA4', 'ATP1B2', 'TICAM1', 'TUBB4A', 'SYT7', 'NRGN', 'IL22RA1', 'CLIP3', 'CTRL', 'FAM163B', 'MAPRE3', 'NPTX1', 'CTSF', 'ATP6V0C']	ARCHS4 (coexpressed genes)	upregulated
EED_16625203_ChIP-ChIP_MESCs_Mouse	-2.68385	26.0686	0.00545225	6.04846e-05	['BARHL1', 'CNTFR', 'EPAS1', 'CRABP1', 'TACSTD2', 'RAX', 'GATA5', 'GATA3', 'FGF3', 'HTR6', 'SIX6', 'HRH3', 'FRZB', 'SLITRK3', 'ZIC1', 'EFHD1', 'NPTX1', 'HES5', 'IRX1', 'IGFBP5', 'WNT3A', 'IRX3', 'OSR1', 'IGF2', 'RTN4RL2', 'EBF4', 'NR2F2', 'DLK1', 'PAX2', 'POU3F4', 'GADD45G', 'CLDN3', 'COL2A1', 'LMX1A', 'SLCO2A1', 'HAND1', 'PKP1', 'LHX5', 'HOXB2', 'HOXB1']	ChEA (experimentally validated targets)	upregulated
BAZ2B_human_tf_ARCHS4_coexpression	-1.46112	10.9219	0.00594008	0.000567102	['ANKRD36C', 'AL023806.1', 'OR7E94P', 'ABCA9', 'LHFPL5', 'AP000769.1', 'OLA1P3', 'HTN1', 'POU5F2', 'AP002962.1', 'SULT1B1', 'RP11-749H20.3', 'PATE4', 'RP11-646I6.3', 'LDHAL6CP', 'FSIP2', 'RP11-153M7.3', 'RP11-536C10.3']	ARCHS4 (coexpressed genes)	downregulated
ZNF28_human_tf_ARCHS4_coexpression	-1.47105	10.9961	0.00594008	0.000567102	['AC004980.9', 'AC012513.4', 'KCNG4', 'KNOP1P2', 'LHFPL5', 'AC002429.5', 'OPRM1', 'OLA1P3', 'NUGGC', 'POU5F2', 'AP002962.1', 'RP4-814D15.1', 'RP11-767L7.1', 'RP11-99A14.1', 'RP11-646I6.3', 'AL365202.1', 'LDHAL6CP', 'RP11-153M7.3']	ARCHS4 (coexpressed genes)	downregulated
ZNF284_human_tf_ARCHS4_coexpression	-1.54692	11.5632	0.00594008	0.000567102	['ATP8A2P2', 'KCNG4', 'RGSL1', 'RP11-354K4.1', 'LRTM1', 'RP11-64D22.1', 'MTHFD2P1', 'AC073065.3', 'KB-1980E6.2', 'FOXP2', 'NUGGC', 'HMGN1P14', 'PCDHB1', 'RP11-43P5.1', 'NIFKP4', 'AL365202.1', 'RP11-358L22.2', 'MARCKSL1P2']	ARCHS4 (coexpressed genes)	downregulated
ZNF829_human_tf_ARCHS4_coexpression	-1.54827	11.5733	0.00594008	0.000567102	['CCNB3P1', 'RP11-484L7.1', 'KCNG4', 'LHFPL5', 'AC073065.3', 'EFCAB12', 'OLA1P3', 'KB-1980E6.2', 'HTN1', 'NUGGC', 'HTN3', 'GRAMD4P3', 'RPS4XP5', 'PCDHB1', 'SRGAP1', 'LDHAL6CP', 'FSIP2', 'RP11-153M7.3']	ARCHS4 (coexpressed genes)	downregulated
ZNF624_human_tf_ARCHS4_coexpression	-1.56002	11.6611	0.00594008	0.000567102	['RP1-37M3.8', 'EIF3EP2', 'LHFPL5', 'NDUFA9P1', 'OPRM1', 'OLA1P3', 'RP1-217P22.2', 'CARF', 'POU5F2', 'RP11-749H20.3', 'ZPBP2', 'GCSAML', 'RP11-646I6.3', 'AL365202.1', 'SRGAP1', 'LDHAL6CP', 'CCDC83', 'RP11-153M7.3']	ARCHS4 (coexpressed genes)	downregulated
TLX2_human_tf_ARCHS4_coexpression	-1.31757	9.84883	0.00594008	0.000567102	['HIST2H2AA4', 'HIST1H4L', 'HIST1H2BL', 'CBSL', 'HIST2H2AB', 'WDR74', 'HIST2H2BF', 'HIST2H2AC', 'HIST2H4A', 'HIST1H3A', 'HIST2H3A', 'HIST1H4J', 'HIST2H3D', 'PPEF2', 'HIST1H4D', 'HIST2H3C', 'FAM83A', 'ZNF354B']	ARCHS4 (coexpressed genes)	downregulated
ZNF701_human_tf_ARCHS4_coexpression	-1.57631	11.7829	0.00594008	0.000567102	['AC005086.3', 'AL023806.1', 'SLC30A4', 'AC008072.1', 'LHFPL5', 'RP11-139K1.2', 'OLA1P3', 'RP1-217P22.2', 'POU5F2', 'AP002962.1', 'RP11-749H20.3', 'RPS4XP5', 'RP11-646I6.3', 'SLAMF6', 'AL365202.1', 'LDHAL6CP', 'RP11-453N18.1', 'RP11-153M7.3']	ARCHS4 (coexpressed genes)	downregulated
ZNF674_human_tf_ARCHS4_coexpression	-1.57901	11.803	0.00594008	0.000567102	['CCNB3P1', 'KCNG4', 'LHFPL5', 'AC073065.3', 'EFCAB12', 'OLA1P3', 'KB-1980E6.2', 'GPR82', 'HTN1', 'NUGGC', 'RP1-76C18.1', 'CNR2', 'PCDHB1', 'PDE6A', 'RP11-44D5.1', 'AL365202.1', 'PBOV1', 'RP11-153M7.3']	ARCHS4 (coexpressed genes)	downregulated
ZNF425_human_tf_ARCHS4_coexpression	-1.64431	12.2912	0.00594008	0.000567102	['KCNG4', 'AC073065.3', 'OPRM1', 'EFCAB12', 'RP1-217P22.2', 'KB-1980E6.2', 'NUGGC', 'POU5F2', 'RP11-507M3.1', 'RP1-76C18.1', 'RP11-402K9.1', 'CNR2', 'PCDHB1', 'B3GALT2', 'RP11-646I6.3', 'AL365202.1', 'RP11-805L22.2', 'RP11-153M7.3']	ARCHS4 (coexpressed genes)	downregulated
ZNF234_human_tf_ARCHS4_coexpression	-1.64905	12.3266	0.00594008	0.000567102	['CCNB3P1', 'KCNG4', 'KIAA1024L', 'ABCA9', 'AC073065.3', 'OLA1P3', 'KB-1980E6.2', 'GPR82', 'HTN1', 'NUGGC', 'POU5F2', 'RP11-646I6.3', 'RP11-44D5.1', 'LDHAL6CP', 'RP11-358L22.2', 'MARCKSL1P2', 'RP1-34L19.1', 'RP11-153M7.3']	ARCHS4 (coexpressed genes)	downregulated
ZNF835_human_tf_ARCHS4_coexpression	-1.72348	12.8829	0.00594008	0.000567102	['RP11-484L7.1', 'KCNG4', 'EIF3EP2', 'RP11-354K4.1', 'MTHFD2P1', 'AC073065.3', 'EFCAB12', 'OLA1P3', 'RP1-217P22.2', 'KB-1980E6.2', 'NUGGC', 'CNR2', 'PCDHB1', 'RP11-646I6.3', 'NIFKP4', 'RP11-358L22.2', 'MARCKSL1P2', 'RP1-34L19.1']	ARCHS4 (coexpressed genes)	downregulated
POU1F1_human_tf_ARCHS4_coexpression	-1.43305	10.712	0.00594008	0.000567102	['HIST1H2BM', 'HIST1H2AL', 'HIST1H2BI', 'HIST1H2BL', 'SLC35G5', 'AC006509.7', 'HOXD10', 'HIST2H2BE', 'PLCG2', 'HIST1H2BF', 'NPM1P40', 'HIST1H2BB', 'NFYAP1', 'RP11-325O24.5', 'FGF23', 'HIST1H2BD', 'KCNJ3', 'HIST1H2BC']	ARCHS4 (coexpressed genes)	downregulated
SUZ12_NT2-D1_hg19	-1.80744	20.0566	0.00614822	1.51621e-05	['BARHL1', 'CNTFR', 'HPSE2', 'CABP7', 'EPAS1', 'FGF3', 'CYP26B1', 'SIX6', 'SOX1', 'ZIC1', 'ZNF503', 'NPTX1', 'BAHCC1', 'TFAP2A', 'TMEM132E', 'EDN3', 'WNT3A', 'IRX3', 'IGFBP3', 'OSR1', 'NR2F1', 'RTN4RL2', 'NR2F2', 'ARID3C', 'FOXP4', 'PAX2', 'COL2A1', 'LMX1A', 'HAND2', 'HAND1', 'LHX5', 'HOXB2']	ENCODE (experimentally validated targets)	upregulated
ZBTB33_SK-N-SH_hg19	-1.73399	17.376	0.00681668	4.44642e-05	['HIST2H2AB', 'HIST2H2AC', 'METTL12', 'TMEM107', 'HIST1H1D', 'HIST1H2AE', 'HIST1H1E', 'HIST1H2AD', 'HIST3H2BB', 'HIST1H2AG', 'HIST1H1B', 'HIST1H1C', 'HIST1H2AB', 'HIST1H2AM', 'HIST1H2AL', 'HIST1H2AI', 'HIST1H2AH', 'HIST1H2AK', 'HIST1H2AJ', 'WDR74', 'HIST2H2BE', 'HIST4H4', 'HIST1H2BF', 'HIST1H2BE', 'HIST1H2BH', 'HIST1H2BG', 'HIST1H2BB', 'HIST1H2BD', 'HIST1H2BC', 'HIST1H2BN', 'HIST1H2BM', 'HIST1H2B…	ENCODE (experimentally validated targets)	downregulated
MEF2A_K562_hg19	-1.92881	19.071	0.00681668	5.08075e-05	['HIST1H2BN', 'HIST1H2BM', 'HIST1H2AI', 'ANKRD30BL', 'HIST1H2AK', 'HIST1H2BL', 'HIST1H2AJ', 'HIST2H2AB', 'WDR74', 'TAS2R13', 'SPATA2', 'HIST2H2BE', 'HIST2H2AC', 'HIST1H1E', 'HIST1H3H', 'HIST1H3B', 'HIST1H4D', 'HIST1H4E', 'HIST1H2BD', 'HIST1H2BC', 'HIST1H2AB']	ENCODE (experimentally validated targets)	downregulated
BCLAF1_K562_hg19	-1.74792	16.9405	0.00710579	6.17895e-05	['HIST1H2BN', 'HIST1H2BM', 'HIST1H2BO', 'HIST2H2AA4', 'HIST1H2BJ', 'HIST1H3J', 'HIST1H2BL', 'HIST2H2AB', 'CYP3A5', 'HIST2H2AC', 'HIST1H3A', 'HIST1H1D', 'HIST1H3F', 'HIST1H2AE', 'HIST1H1E', 'HIST1H2AD', 'HIST3H2BB', 'HIST1H3H', 'HIST1H2AG', 'HIST1H3B', 'HIST1H1B', 'HIST1H1C', 'HIST1H2AB', 'HIST1H2AM', 'HIST1H2AL', 'HIST1H2AI', 'HIST1H2AH', 'HIST1H2AK', 'HIST1H2AJ', 'WDR74', 'HIST2H2BF', 'HIST2H2BE…	ENCODE (experimentally validated targets)	downregulated
NHLH1_human_tf_ARCHS4_coexpression	-1.49156	11.1494	0.0094495	0.000567102	['TCP10L', 'CNTFR', 'LINGO1', 'BTBD17', 'WFIKKN1', 'CHRNA4', 'CABP7', 'CRABP1', 'ELAVL4', 'RTN4RL2', 'KIF19', 'MDK', 'NNAT', 'GDAP1L1', 'NPIPA3', 'GNG8', 'LHX5', 'CTXN1']	ARCHS4 (coexpressed genes)	upregulated
NKX6-2_human_tf_ARCHS4_coexpression	-1.43669	10.7393	0.0094495	0.000567102	['LINGO1', 'LYNX1', 'RAB3A', 'PLEKHB1', 'ATP1B2', 'TUBB4A', 'CLIP3', 'FA2H', 'GPR162', 'CACNG7', 'PSD2', 'ZIC1', 'CERCAM', 'EFHD1', 'MAPRE3', 'CTXN1', 'CRYAB', 'LRRC4B']	ARCHS4 (coexpressed genes)	upregulated
FEZF2_human_tf_ARCHS4_coexpression	-1.77185	13.2446	0.0094495	0.000567102	['CRB2', 'CDSN', 'BTBD17', 'WFIKKN1', 'NOXO1', 'MSLN', 'MEOX1', 'DLK1', 'CTB-63M22.1', 'GADD45G', 'SOX1', 'PPDPF', 'SMOC1', 'ZIC1', 'NPIPA3', 'LHX5', 'CTXN1', 'HES5']	ARCHS4 (coexpressed genes)	upregulated
HES4_human_tf_ARCHS4_coexpression	-1.74731	13.0611	0.0094495	0.000567102	['CRB2', 'IRX1', 'WFIKKN1', 'TTYH1', 'DLK1', 'CTB-63M22.1', 'SRM', 'SOX1', 'COL2A1', 'MDK', 'PPDPF', 'ZIC1', 'ZNF703', 'ZNF503', 'RPRML', 'CTXN1', 'HES5', 'LRRC4B']	ARCHS4 (coexpressed genes)	upregulated
HOXD8_human_tf_ARCHS4_coexpression	-1.40496	10.502	0.0094495	0.000567102	['TFAP2A', 'CLEC18B', 'COPZ2', 'PCOLCE', 'NR2F2', 'PTH1R', 'LRRC32', 'PAX2', 'COL3A1', 'BCAM', 'ISLR', 'HAND2', 'ZNF703', 'MXRA8', 'TIMP3', 'SNAI2', 'ZNF503', 'ATP6V1B1']	ARCHS4 (coexpressed genes)	upregulated
CREB3L4_human_tf_ARCHS4_coexpression	-1.50487	11.2488	0.0094495	0.000567102	['CRABP2', 'AMHR2', 'IRX3', 'HSPB1', 'GATA3', 'AC006011.4', 'MUC1', 'CLDN4', 'BCAM', 'KRT19', 'CLDN3', 'CRACR2B', 'PPDPF', 'AGR2', 'EFHD1', 'AGR3', 'TJP3', 'ZNF662']	ARCHS4 (coexpressed genes)	upregulated
SOX12_human_tf_ARCHS4_coexpression	-1.5344	11.4696	0.0094495	0.000567102	['CNTFR', 'LINGO1', 'ELAVL4', 'NR2F1', 'LDOC1', 'PTMS', 'POU3F4', 'ARHGAP33', 'CACNG7', 'MDK', 'PPDPF', 'GDAP1L1', 'ZIC1', 'LHX5', 'ZNF358', 'CTXN1', 'PRR36', 'LRRC4B']	ARCHS4 (coexpressed genes)	upregulated
HOXD3_human_tf_ARCHS4_coexpression	-1.55478	11.6219	0.0094495	0.000567102	['OSR1', 'LMOD1', 'NR2F1', 'PCOLCE', 'DUSP15', 'MRPL12', 'MEOX1', 'SORBS3', 'PTCHD3P1', 'PAX2', 'PTMS', 'COL3A1', 'RPS16', 'ZNF703', 'ZNF503', 'HOXB2', 'ZNF358', 'KANK4']	ARCHS4 (coexpressed genes)	upregulated
FOXE1_human_tf_ARCHS4_coexpression	-1.43423	10.7208	0.0094495	0.000567102	['LGALS3BP', 'FCGBP', 'ECM1', 'CLIC3', 'RAMP3', 'EPAS1', 'TACSTD2', 'KRT7', 'GRHL3', 'KRT5', 'IGHG1', 'KRT17', 'FNDC1', 'TRIM29', 'SLCO2A1', 'LY6D', 'PKP1', 'KRT6A']	ARCHS4 (coexpressed genes)	upregulated
NFIX_human_tf_ARCHS4_coexpression	-1.36437	10.1986	0.0094495	0.000567102	['LYNX1', 'MYBPC2', 'HSPB6', 'PLEKHB1', 'SHISA4', 'ATP1B2', 'SORBS3', 'TUBB4A', 'CLIP3', 'OLFM2', 'CSRP1', 'TCEA3', 'CERCAM', 'MXRA8', 'MAPRE3', 'CTSF', 'ZNF358', 'CRYAB']	ARCHS4 (coexpressed genes)	upregulated
GRHL2_human_tf_ARCHS4_coexpression	-1.40335	10.49	0.0094495	0.000567102	['TFAP2A', 'IRX3', 'TACSTD2', 'HSPB1', 'GRHL3', 'GATA3', 'VTCN1', 'RHOD', 'MUC1', 'CLDN4', 'BCAM', 'KRT19', 'C1ORF116', 'CLDN3', 'TRIM29', 'AGR2', 'AGR3', 'TJP3']	ARCHS4 (coexpressed genes)	upregulated
ZIC1_human_tf_ARCHS4_coexpression	-1.41544	10.5804	0.0094495	0.000567102	['CRB2', 'IRX1', 'CNTFR', 'TMEM132C', 'RAB3A', 'ATP1B2', 'TUBB4A', 'CLIP3', 'GPR162', 'CACNG7', 'COL1A2', 'SOX1', 'PSD2', 'MAPRE3', 'NPTX1', 'CTXN1', 'PRR36', 'LRRC4B']	ARCHS4 (coexpressed genes)	upregulated
ELF5_human_tf_ARCHS4_coexpression	-1.59736	11.9402	0.0094495	0.000567102	['CRB2', 'LMO1', 'TFAP2A', 'CRABP2', 'IFI6', 'HSPB1', 'KRT23', 'AC234582.1', 'GATA3', 'VTCN1', 'SOD3', 'MUC1', 'CLDN4', 'KRT19', 'CLDN3', 'CRACR2B', 'EFHD1', 'TSPYL5']	ARCHS4 (coexpressed genes)	upregulated
DNAJC2_21179169_ChIP-ChIP_NT2_Human	-2.18406	19.067	0.0127503	0.000161652	['TCP10L', 'FCGBP', 'RAMP3', 'CRABP2', 'DPYS', 'LAMA3', 'ELAVL4', 'NOXO1', 'CSF2RB', 'LYPD3', 'MSLN', 'CACNG7', 'CYP26B1', 'ISLR', 'ANPEP', 'TIMP3', 'UTY', 'KCNN4', 'PPP1R14A', 'TFAP2B', 'CDSN', 'IGFBP5', 'RHBDD2', 'WNT3A', 'IRX3', 'OSR1', 'NPFF', 'COPZ2', 'NR1D1', 'CBFA2T3', 'SORBS3', 'SSTR5', 'GPR162', 'MMP11', 'OLFM2', 'FAP', 'PPP1R1B', 'CD248', 'GAS6', 'SERINC2', 'RAMP1']	ChEA (experimentally validated targets)	upregulated
DMC1_human_tf_ARCHS4_coexpression	-1.67778	10.9223	0.0137809	0.00148853	['CCNB3P1', 'KCNG4', 'RP11-354K4.1', 'LHFPL5', 'MTHFD2P1', 'AC006509.7', 'OPRM1', 'OLA1P3', 'KB-1980E6.2', 'NUGGC', 'GBP1P1', 'AC004386.4', 'CNR2', 'PCDHB1', 'HIST3H2BB', 'AC010287.1', 'RP11-153M7.3']	ARCHS4 (coexpressed genes)	downregulated
AIRE_human_tf_ARCHS4_coexpression	-1.65458	10.7712	0.0137809	0.00148853	['ZNF483', 'KCNG4', 'AC073065.3', 'OPRM1', 'EFCAB12', 'OLA1P3', 'KB-1980E6.2', 'GPR82', 'NUGGC', 'POU5F2', 'RP1-76C18.1', 'PCDHB1', 'OR11A1', 'AC010287.1', 'SRGAP1', 'PBOV1', 'RP1-34L19.1']	ARCHS4 (coexpressed genes)	downregulated
ZNF619_human_tf_ARCHS4_coexpression	-1.57173	10.2319	0.0137809	0.00148853	['AC005086.3', 'OR7E94P', 'EIF3EP2', 'C9ORF131', 'AC008072.1', 'OPRM1', 'OLA1P3', 'KB-1980E6.2', 'GPR82', 'HTN1', 'NUGGC', 'POU5F2', 'RP11-749H20.3', 'RP1-76C18.1', 'CNR2', 'AC004019.10', 'LDHAL6CP']	ARCHS4 (coexpressed genes)	downregulated
ZBTB37_human_tf_ARCHS4_coexpression	-1.36161	8.86405	0.0137809	0.00148853	['AL023806.1', 'AC008072.1', 'ABCA9', 'LHFPL5', 'AP000769.1', 'EFCAB12', 'OLA1P3', 'HTN1', 'POU5F2', 'SULT1B1', 'RP11-749H20.3', 'KYNU', 'TMEM14EP', 'LDHAL6CP', 'RP11-453N18.1', 'FSIP2', 'RP11-536C10.3']	ARCHS4 (coexpressed genes)	downregulated
ZNF788_human_tf_ARCHS4_coexpression	-1.43223	9.32374	0.0137809	0.00148853	['CCNB3P1', 'AL023806.1', 'KCNG4', 'OR7E94P', 'ABCA9', 'LHFPL5', 'AC073065.3', 'OLA1P3', 'KB-1980E6.2', 'GPR82', 'HTN1', 'RP11-507M3.1', 'SULT1B1', 'RP11-749H20.3', 'CNR2', 'RP1-34L19.1', 'RP11-153M7.3']	ARCHS4 (coexpressed genes)	downregulated
ZNF445_human_tf_ARCHS4_coexpression	-1.46785	9.55564	0.0137809	0.00148853	['AL023806.1', 'OR7E94P', 'AC008072.1', 'ABCA9', 'AC073065.3', 'EFCAB12', 'OLA1P3', 'HTN1', 'SULT1B1', 'RP11-749H20.3', 'KYNU', 'SRGAP1', 'PPIAL4G', 'RP1-34L19.1', 'FSIP2', 'RP11-153M7.3', 'RP11-536C10.3']	ARCHS4 (coexpressed genes)	downregulated
AHDC1_human_tf_ARCHS4_coexpression	-1.48388	9.65997	0.0137809	0.00148853	['LRRC69', 'HEPACAM', 'RP11-93O17.2', 'RP11-354K4.1', 'MTHFD2P1', 'AC006509.7', 'RP11-113I24.1', 'FAM60DP', 'HMGN1P14', 'GBP1P1', 'PCDHB1', 'AC008686.1', 'NPM1P40', 'RP11-43P5.1', 'RPSAP48', 'RP11-325O24.5', 'KCNJ3']	ARCHS4 (coexpressed genes)	downregulated
CTCFL_human_tf_ARCHS4_coexpression	-1.48764	9.68451	0.0137809	0.00148853	['AL023806.1', 'AC008072.1', 'ABCA9', 'LHFPL5', 'EFCAB12', 'OLA1P3', 'HTN1', 'BX004987.1', 'AP002962.1', 'AL354822.1', 'RP11-749H20.3', 'PATE4', 'OR11A1', 'ANKRD20A8P', 'LDHAL6CP', 'RP11-153M7.3', 'RP11-536C10.3']	ARCHS4 (coexpressed genes)	downregulated
ZNF546_human_tf_ARCHS4_coexpression	-1.5907	10.3554	0.0137809	0.00148853	['CCNB3P1', 'RP11-484L7.1', 'WFDC11', 'OR7E94P', 'MTHFD2P1', 'AC073065.3', 'EFCAB12', 'OLA1P3', 'NUGGC', 'GBP1P1', 'FCGR2A', 'PCDHB1', 'AC008686.1', 'RP11-99A14.1', 'HIST1H2BE', 'HIST3H2BB', 'RP1-34L19.1']	ARCHS4 (coexpressed genes)	downregulated
RGS9_human_tf_ARCHS4_coexpression	-1.49827	9.75367	0.0137809	0.00148853	['CCNB3P1', 'ZNF483', 'KCNG4', 'LRTM1', 'MTHFD2P1', 'AC073065.3', 'EFCAB12', 'OLA1P3', 'KB-1980E6.2', 'NUGGC', 'POU5F2', 'NEUROD1', 'GBP1P1', 'CNR2', 'PCDHB1', 'ANKS4B', 'PDE6A']	ARCHS4 (coexpressed genes)	downregulated
ZNF781_human_tf_ARCHS4_coexpression	-1.50304	9.78474	0.0137809	0.00148853	['ANKRD36C', 'AC004980.9', 'AC002429.5', 'RPL17P19', 'AC016549.1', 'POU5F2', 'RP11-749H20.3', 'RP1-76C18.1', 'RPS4XP5', 'RP11-646I6.3', 'OR11A1', 'RP11-631M6.2', 'AL365202.1', 'SRGAP1', 'LDHAL6CP', 'RP11-453N18.1', 'CCDC83']	ARCHS4 (coexpressed genes)	downregulated
ZNF570_human_tf_ARCHS4_coexpression	-1.50381	9.78972	0.0137809	0.00148853	['CCNB3P1', 'RP11-484L7.1', 'KCNG4', 'SLC30A4', 'MTHFD2P1', 'AC073065.3', 'AC002429.5', 'OPRM1', 'OLA1P3', 'KB-1980E6.2', 'NUGGC', 'RP1-274L7.4', 'CNR2', 'PCDHB1', 'RP11-342F17.1', 'AL365202.1', 'RP11-722G7.1']	ARCHS4 (coexpressed genes)	downregulated
ZNF559_human_tf_ARCHS4_coexpression	-1.55104	10.0972	0.0137809	0.00148853	['AC004980.9', 'EIF3EP2', 'TAS2R12', 'TAS2R13', 'OLA1P3', 'POU5F2', 'HTN3', 'RP11-749H20.3', 'RP1-76C18.1', 'PATE4', 'RP11-646I6.3', 'OR11A1', 'AL365202.1', 'LDHAL6CP', 'RP11-453N18.1', 'RP11-153M7.3', 'RP11-687F6.4']	ARCHS4 (coexpressed genes)	downregulated
FOXD4_human_tf_ARCHS4_coexpression	-1.55921	10.1504	0.0137809	0.00148853	['KCNG4', 'PCDH9', 'HEPACAM', 'RP11-93O17.2', 'TBR1', 'AC006509.7', 'PSG2', 'RP4-569D19.5', 'RP11-113I24.1', 'FAM60DP', 'RTN4RL1', 'NPM1P40', 'RPSAP48', 'RPL36AP53', 'RP11-325O24.5', 'KCNJ3', 'ENPP7P12']	ARCHS4 (coexpressed genes)	downregulated
ZNF2_human_tf_ARCHS4_coexpression	-1.56861	10.2116	0.0137809	0.00148853	['RP11-484L7.1', 'KCNG4', 'RP11-354K4.1', 'MTHFD2P1', 'AC073065.3', 'KB-1980E6.2', 'RP11-58E21.1', 'NUGGC', 'POU5F2', 'NEUROD1', 'BNIP3P37', 'CNR2', 'PCDHB1', 'RP11-44D5.1', 'RP11-358L22.2', 'MARCKSL1P2', 'RP11-805L22.2']	ARCHS4 (coexpressed genes)	downregulated
ZNF70_human_tf_ARCHS4_coexpression	-1.56974	10.219	0.0137809	0.00148853	['CCNB3P1', 'RP11-484L7.1', 'KCNG4', 'RP11-93O17.2', 'RP11-354K4.1', 'MTHFD2P1', 'OLA1P3', 'KB-1980E6.2', 'NUGGC', 'GRAMD4P3', 'GBP1P1', 'CNR2', 'PCDHB1', 'NIFKP4', 'SRGAP1', 'RP1-34L19.1', 'RP11-153M7.3']	ARCHS4 (coexpressed genes)	downregulated
ZNF793_human_tf_ARCHS4_coexpression	-1.5741	10.2473	0.0137809	0.00148853	['CCNB3P1', 'KCNG4', 'OR7E94P', 'ABCA9', 'LHFPL5', 'AC073065.3', 'EFCAB12', 'OLA1P3', 'NUGGC', 'GRAMD4P3', 'BNIP3P37', 'CNR2', 'PCDHB1', 'SRGAP1', 'RP1-34L19.1', 'FSIP2', 'RP11-153M7.3']	ARCHS4 (coexpressed genes)	downregulated
MEIS1_human_tf_ARCHS4_coexpression	-1.58242	10.3015	0.0137809	0.00148853	['RP11-484L7.1', 'AC012513.4', 'RP11-217O12.1', 'RP11-354K4.1', 'LRTM1', 'TAS2R12', 'MTHFD2P1', 'RP11-113I24.1', 'RP1-217P22.2', 'NUGGC', 'C1ORF111', 'NEUROD1', 'PCDHB1', 'GCSAML', 'RP11-358L22.2', 'MARCKSL1P2', 'RP11-805L22.2']	ARCHS4 (coexpressed genes)	downregulated
MEF2C_GM12878_hg19	-1.90829	16.8742	0.0145352	0.000144449	['HIST1H2AL', 'WDR74', 'ZPBP2', 'HIST1H1D', 'HIST1H2AE', 'HIST1H1E', 'HIST1H2BG', 'HIST1H3B', 'HIST1H1B', 'HIST1H2BD', 'HIST1H1C', 'HIST1H2BC', 'HIST1H2AB']	ENCODE (experimentally validated targets)	downregulated
[truncated: 58 more rows]

## Sheet: vs 2iL+Go HNES1 hESC 
term_name	zscore	combined_score	FDR	pvalue	overlapping_genes	gene_set_library	geneset
[truncated: 292 more rows]

## Sheet: vs XAV939 HNES1 hESC
term_name	zscore	combined_score	FDR	pvalue	overlapping_genes	gene_set_library	log10P	geneset
[truncated: 832 more rows]

## Sheet: vs H1 hESC-iMEF
term_name	zscore	combined_score	FDR	pvalue	overlapping_genes	gene_set_library	geneset
[truncated: 94 more rows]

## Sheet: vs TesR1 H9 hESC
term_name	zscore	combined_score	FDR	pvalue	overlapping_genes	gene_set_library	geneset
[truncated: 115 more rows]

[truncated: 2 more sheets: vs AMIQ hESC-hAEC-CM, vs AMIQ hESC-iMEF-CM]
