# Supplementary material for: The human amniotic epithelium confers a bias to differentiate toward the neuroectoderm lineage in human embryonic stem cells
Source: eLife. 2022 Jul 11;11:e68035. doi: 10.7554/eLife.68035 (PMC9313526; doi:10.7554/eLife.68035)
Supplement: Supplementary file 5. [file elife-68035-supp5.xlsx]

## Sheet: Hoja1
Antibody	Source
Mouse anti-Oct3/4	BD Biosciences Cat# 611202, RRID:AB_398736
Rabbit anti-Oct4	Abcam Cat# ab19857, RRID:AB_445175
Rabbit anti-Nanog	PeproTech Cat# 500-P236-100ug, RRID:AB_1268274
Rabbit anti-Sox2	Abcam Cat# ab97959, RRID:AB_2341193
Rabbit anti-Sox2	Millipore Cat# AB5603, RRID:AB_2286686
Mouse anti-Tra 1–60	Abcam Cat#Ab16288, RRID:AB_778563
Mouse anti-E-cadherin	BD Biosciences Cat#610181, RRID:AB_3975
Mouse anti-Gapdh	GeneTex Cat# GTX78213, RRID:AB_625368
Mouse anti-Akt	Cell Signaling Technology Cat# 2920, RRID:AB_1147620
Mouse anti-p44/42 MAPK (Erk1/2)	Cell Signaling Technology Cat# 4696, RRID:AB_390780
Mouse anti-Stat3	Cell Signaling Technology Cat# 9139, RRID:AB_331757
Mouse anti-AP-2alpha (Tfap2c)	Santa Cruz Biotechnology Cat# sc-12726, RRID:AB_667767
Mouse anti-Human BLIMP1/PRDM1	R and D Systems Cat# MAB36081, RRID:AB_10718104
Rabbit anti-Stella	Abcam Cat# ab19878, RRID:AB_2246120
Rabbit anti-Pax6	Abcam Cat# ab195045, RRID:AB_2750924
Mouse anti-Nestin	GeneTex Cat# GTX30671, RRID:AB_625325
Rabbit anti-Map2	GeneTex Cat# GTX133109, RRID:AB_2886830
Rat anti-Ctip2	Abcam Cat# ab18465, RRID:AB_2064130
Mouse anti-Gad67	Millipore Cat# MAB5406, RRID:AB_2278725)
Mouse anti-Calretinin	Millipore Cat# MAB1568, RRID:AB_94259
Rabbit anti-Foxp2	Abcam Cat# ab16046, RRID:AB_2107107
Rabbit anti-Human Chorionic Gonadotropin	Agilent Cat# N1534, RRID:AB_2631227
Goat Anti-Mouse Alexa Fluor 488	Thermo Fisher Scientific Cat#A-11029, RRID:AB_2534088
Goat Anti-Rabbit Alexa Fluor 568	Thermo Fisher Scientific Cat#A-11036, RRID:AB_10563566
Goat Anti-Rabbit Alexa Fluor 488	Thermo Fisher Scientific Cat# A-11034, RRID:AB_2576217
Goat Anti-Mouse Alexa Fluor 568	Thermo Fisher Scientific Cat# A-11031, RRID:AB_144696
Goat Anti-Rat Alexa Fluor 488	Thermo Fisher Scientific Cat# A-11006, RRID:AB_2534074
